# Supplementary material for: Single-cell transcriptomics of vomeronasal neuroepithelium reveals a differential endoplasmic reticulum environment amongst neuronal subtypes
Source: eLife. 2024 Dec 13;13:RP98250. doi: 10.7554/eLife.98250 (PMC11643622; doi:10.7554/eLife.98250)
Supplement: Figure 1—figure supplement 1—source data 1. — The comparison of each cluster is separated in sheets. [file elife-98250-fig1-figsupp1-data1.xlsx]

## Sheet: 1-Endothelial-2 male vs female
Gene	p value	Average log2 fold change	Fraction of cells expressing the gene in male cluster	Fraction of cells expressing the gene in female cluster	Adjusted p value
Pfdn5	0.00096379	1.04724	1	0.737	1
Fryl	0.0011699	2.23124	0.833	0.526	1
Fyttd1	0.00118167	2.89769	0.667	0.211	1
Acer2	0.00141276	1.58835	0.833	0.368	1
Itm2a	0.00211194	-2.06819	0.389	0.737	1
Scaf1	0.00228847	3.87131	0.5	0.053	1
Sema6d	0.00255605	-3.94589	0	0.421	1
Nhsl2	0.00255605	-3.73781	0	0.421	1
Nfkbia	0.00276386	1.31123	0.944	0.632	1
Smarca5	0.00288202	2.76043	0.611	0.158	1
Actg1	0.00288551	1.46432	0.944	0.842	1
Leprotl1	0.00328801	-3.28831	0.111	0.579	1
B3gat3	0.00334372	3.7826	0.389	0	1
Slc16a9	0.00335236	-3.67994	0.056	0.474	1
Fam193b	0.00443602	3.63451	0.444	0.053	1
Cnih4	0.00450243	-1.77847	0.111	0.632	1
Galnt15	0.00492815	1.56531	0.833	0.421	1
Gclc	0.00503154	3.07111	0.444	0.053	1
Cdh13	0.00505844	-2.19831	0.167	0.632	1
Sat1	0.00539604	0.941435	0.944	0.421	1
Ubb	0.00542924	0.8644	0.944	1	1
9530068E07Rik	0.00545885	-4.10921	0	0.368	1
Dnajb11	0.00630537	1.7352	0.667	0.263	1
Kmt2b	0.00748133	5.2127	0.333	0	1
Eif2s3y	0.00748133	3.87217	0.333	0	1
Ubc	0.00763681	1.49526	0.889	0.737	1
Tspyl1	0.00772753	-2.98823	0.056	0.421	1
Serpinh1	0.00776688	-1.82856	0.333	0.737	1
Commd6	0.00803725	-2.9587	0.111	0.474	1
Tsc22d3	0.00849581	2.84094	0.5	0.105	1
Plpp3	0.00859362	-1.91942	0.5	0.842	1
Myl12b	0.00940704	1.36345	0.833	0.526	1
Hnrnpk	0.00948995	-1.1726	0.5	0.789	1
Zfand6	0.00979372	-3.15658	0.056	0.421	1
Gimap1	0.0107919	-2.07414	0.278	0.632	1
Cd59a	0.0113218	-3.77094	0	0.316	1
Alg14	0.0113218	-3.42836	0	0.316	1
Fto	0.0113218	-3.58144	0	0.316	1
Lars	0.0113218	-3.16564	0	0.316	1
Pin4	0.0114159	-2.62999	0.167	0.526	1
Idnk	0.0117717	2.19657	0.5	0.105	1
Dnlz	0.0120615	3.38912	0.389	0.053	1
Tmem176a	0.01344	-1.52962	0.389	0.737	1
Tcf25	0.0134801	-1.73111	0.333	0.684	1
Tns1	0.0135814	3.18037	0.389	0.053	1
Vps53	0.0135814	4.19108	0.389	0.053	1
Per1	0.0136177	3.68475	0.444	0.105	1
BC005624	0.0137964	-2.66552	0.111	0.474	1
Rtl8a	0.0138184	-2.30706	0.056	0.421	1
Dstn	0.0140855	-1.19112	0.611	0.842	1
Top1	0.014679	1.78167	0.722	0.421	1
Itga6	0.0146981	-1.32651	0.556	0.895	1
Il13ra1	0.0151682	3.31517	0.444	0.105	1
Palmd	0.0151682	3.52227	0.389	0.105	1
Ier5l	0.0152143	2.21274	0.611	0.211	1
Chtop	0.015268	3.0674	0.389	0.053	1
Dennd5a	0.015268	3.70876	0.389	0.053	1
Tcim	0.015268	2.75295	0.333	0.053	1
Hmox2	0.0154193	2.52547	0.556	0.211	1
Tcp1	0.0154193	2.41804	0.556	0.211	1
H3f3b	0.0155793	0.714548	0.889	0.842	1
Tax1bp1	0.015652	2.44704	0.611	0.316	1
Cry2	0.0162636	4.279	0.278	0	1
Vps16	0.0162636	3.96572	0.278	0	1
Hspa12b	0.0162636	4.78653	0.278	0	1
Zpld2	0.0162636	4.11626	0.278	0	1
Gpn3	0.0162636	3.54867	0.278	0	1
Pde7b	0.0162636	3.40979	0.278	0	1
Dazap1	0.0162636	3.58138	0.278	0	1
Atp11a	0.0162636	3.19042	0.278	0	1
Myo9a	0.0162636	3.23985	0.278	0	1
Bag5	0.0162636	3.86875	0.278	0	1
N6amt1	0.0162636	4.15868	0.278	0	1
Cystm1	0.0162636	4.97786	0.222	0	1
Sntb2	0.016324	1.96006	0.667	0.316	1
Rplp1	0.0169311	0.555804	0.944	0.789	1
Rpa3	0.0169623	2.20767	0.556	0.211	1
Ppp1cb	0.0169779	-2.67223	0.167	0.526	1
0610010K14Rik	0.0171364	2.90051	0.389	0.053	1
Ssbp2	0.0171364	2.52614	0.389	0.053	1
Ing1	0.0171364	-2.46232	0.056	0.368	1
Fam172a	0.0171364	-3.1268	0.056	0.368	1
Mndal	0.0174811	1.38259	0.778	0.526	1
Vcam1	0.0175998	2.71727	0.667	0.368	1
Rtn3	0.0182269	2.55447	0.667	0.474	1
Dab2	0.0186951	-1.80284	0.167	0.526	1
Gbp4	0.0187416	2.98604	0.444	0.105	1
Fgl2	0.0187868	-2.07678	0.111	0.474	1
Grn	0.0191335	-1.88334	0.444	0.737	1
Cyth2	0.0192025	2.22299	0.389	0.053	1
Rnps1	0.0192025	-2.82672	0.056	0.368	1
Orai1	0.0194787	2.01424	0.667	0.316	1
Clec14a	0.0202876	-1.13307	0.722	0.842	1
Tmem60	0.020346	-2.57635	0.167	0.474	1
Ndfip1	0.0204708	-1.67531	0.278	0.632	1
Pglyrp1	0.02077	-2.93534	0.111	0.474	1
Timp3	0.0208068	-1.45579	0.444	0.737	1
Nipbl	0.020925	1.77313	0.667	0.368	1
Itgb1	0.0219955	-1.69247	0.611	0.947	1
Psma4	0.0224165	1.03316	0.778	0.526	1
Adam10	0.0225042	-0.783647	0.389	0.737	1
Itga5	0.0225901	-1.57495	0.167	0.526	1
Acad9	0.0228982	-2.60447	0	0.263	1
Pdik1l	0.0228982	-2.97074	0	0.263	1
Mxra8	0.0228982	-3.06233	0	0.263	1
Smurf1	0.0228982	-2.89853	0	0.263	1
Mbd4	0.0228982	-2.77277	0	0.263	1
Tmem135	0.0228982	-2.83097	0	0.263	1
Ikzf5	0.0228982	-4.11624	0	0.263	1
Ube2g2	0.0228982	-3.09599	0	0.263	1
Cog8	0.0228982	-3.69307	0	0.263	1
Apex1	0.0228982	-3.88034	0	0.263	1
Morc2a	0.0228982	-3.76638	0	0.263	1
9930111J21Rik2	0.0228982	-3.2312	0	0.263	1
Glis2	0.0228982	-3.18829	0	0.263	1
Commd10	0.0228982	-3.0255	0	0.263	1
Polr2a	0.0229333	2.89274	0.444	0.158	1
Sfpq	0.0232923	-2.41398	0.278	0.579	1
Tsen15	0.0239959	-2.3335	0.056	0.368	1
Wwp1	0.0247595	3.8941	0.333	0.053	1
Baiap2	0.0247595	3.02009	0.333	0.053	1
Fbln5	0.0247595	3.6443	0.333	0.053	1
Golgb1	0.0268802	1.87964	0.556	0.211	1
Cox4i1	0.0270777	0.678768	0.889	0.737	1
Mecom	0.0270841	0.608801	0.111	0.526	1
Ufm1	0.0274523	2.69423	0.556	0.263	1
Thap3	0.027759	2.69836	0.333	0.053	1
Exoc7	0.027759	3.10723	0.333	0.053	1
Cbx5	0.027759	2.50988	0.333	0.053	1
Gorasp2	0.028148	-2.42022	0.111	0.421	1
Ctnnal1	0.028148	-2.32358	0.111	0.421	1
Txndc17	0.0285158	-1.63169	0.389	0.684	1
Rassf3	0.0297225	-2.36807	0.167	0.474	1
Btg3	0.0297496	-1.76529	0.167	0.526	1
Rpl39	0.0298059	-0.49123	1	0.947	1
Rab11a	0.0299441	1.67238	0.667	0.474	1
Cdkn2aip	0.0310667	2.47707	0.333	0.053	1
Cers5	0.0310667	2.73836	0.333	0.053	1
Slc3a2	0.0316012	0.721808	0.944	0.684	1
Avpi1	0.0324299	3.07328	0.389	0.105	1
Zranb2	0.0331201	-1.87273	0.056	0.368	1
Phf5a	0.0336567	2.25552	0.444	0.158	1
Vps29	0.0342165	-2.51937	0.111	0.421	1
Endod1	0.0342165	-2.48561	0.111	0.421	1
Dusp12	0.0345485	3.79528	0.222	0	1
Apip	0.0345485	2.1598	0.222	0	1
Fam122b	0.0345485	2.98707	0.222	0	1
Mtmr1	0.0345485	3.2705	0.222	0	1
Hspa4l	0.0345485	2.94614	0.222	0	1
Pfn2	0.0345485	3.21568	0.222	0	1
Hs2st1	0.0345485	2.96711	0.222	0	1
Lyrm2	0.0345485	2.75585	0.222	0	1
Tdrd7	0.0345485	4.27313	0.222	0	1
Pakap.2	0.0345485	2.98549	0.222	0	1
Cpt2	0.0345485	2.98248	0.222	0	1
Zfp512	0.0345485	3.07751	0.222	0	1
Grsf1	0.0345485	3.78442	0.222	0	1
Shroom3	0.0345485	2.75145	0.222	0	1
Oasl1	0.0345485	3.99115	0.222	0	1
Acad12	0.0345485	3.66592	0.222	0	1
Brap	0.0345485	3.45234	0.222	0	1
Bcl7a	0.0345485	3.33846	0.222	0	1
Usp12	0.0345485	3.64724	0.222	0	1
Fiz1	0.0345485	3.11152	0.222	0	1
Cep44	0.0345485	2.88961	0.222	0	1
Arhgap10	0.0345485	3.42418	0.222	0	1
Usp10	0.0345485	2.89275	0.222	0	1
Usp54	0.0345485	3.67235	0.222	0	1
Bcl2l2	0.0345485	2.88637	0.222	0	1
Bin3	0.0345485	3.4183	0.222	0	1
Hmg20a	0.0345485	2.97325	0.222	0	1
Cish	0.0345485	3.96972	0.222	0	1
Rnf135	0.0345485	3.31895	0.222	0	1
Tob1	0.0345485	2.74648	0.222	0	1
Myl4	0.0345485	3.48987	0.222	0	1
Sap30bp	0.0345485	3.24618	0.222	0	1
Nup153	0.0345485	3.90573	0.222	0	1
Isca2	0.0345485	3.13491	0.222	0	1
Mroh1	0.0345485	4.78808	0.222	0	1
Rangap1	0.0345485	3.682	0.222	0	1
Thap7	0.0345485	2.506	0.222	0	1
Zdhhc8	0.0345485	4.13708	0.222	0	1
Zbtb11	0.0345485	2.89593	0.222	0	1
Riox2	0.0345485	2.32764	0.222	0	1
Arhgdig	0.0345485	4.71734	0.222	0	1
Ddx3y	0.0345485	2.91693	0.222	0	1
Cpsf7	0.0345485	3.06147	0.222	0	1
Frat2	0.0345485	3.48255	0.222	0	1
Btrc	0.0345485	2.71885	0.222	0	1
Rab11fip2	0.0345485	3.21463	0.222	0	1
Csf2ra	0.0345485	2.14526	0.222	0	1
Sqor	0.0345485	3.30808	0.167	0	1
Vim	0.0346532	0.928227	0.944	0.895	1
Prpf38b	0.0347071	2.15829	0.333	0.053	1
Ramac	0.0347071	2.21492	0.333	0.053	1
R3hdm4	0.0347071	2.57691	0.333	0.053	1
H2ax	0.0347071	2.7619	0.333	0.053	1
Cnot1	0.0358424	2.71482	0.389	0.105	1
Timm23	0.0358424	2.06766	0.389	0.105	1
Pkd1	0.0358424	3.52545	0.389	0.105	1
Zfpl1	0.0358424	2.24146	0.389	0.105	1
Col4a1	0.0360069	-3.08697	0.5	0.789	1
Dpy19l4	0.03666	-3.22448	0.056	0.316	1
Stoml2	0.03666	-2.98674	0.056	0.316	1
Pex14	0.03666	-2.57943	0.056	0.316	1
Gcn1	0.03666	-2.96576	0.056	0.316	1
Bet1	0.03666	-3.84793	0.056	0.316	1
Tmem43	0.03666	-3.78454	0.056	0.316	1
Mosmo	0.03666	-2.9156	0.056	0.316	1
Cnksr3	0.03666	-2.30368	0.056	0.316	1
Adarb1	0.03666	-3.02833	0.056	0.316	1
Fgd6	0.03666	-3.12559	0.056	0.316	1
Jmy	0.03666	-3.42974	0.056	0.316	1
Twsg1	0.03666	-3.3651	0.056	0.316	1
Glod4	0.0369275	2.42301	0.444	0.158	1
Diaph1	0.0369275	2.2519	0.444	0.158	1
Uaca	0.0369927	1.93393	0.611	0.316	1
Stx7	0.038662	-2.36583	0.167	0.421	1
Pabpn1	0.0387058	2.34779	0.333	0.053	1
Hacd4	0.0390019	-2.51231	0.167	0.474	1
Rp9	0.0390019	-1.34005	0.167	0.474	1
Stub1	0.0391862	1.80816	0.667	0.421	1
Cebpd	0.0391862	2.15314	0.611	0.421	1
Fkbp1a	0.0394097	-1.3443	0.5	0.684	1
Wdfy3	0.0395564	2.44974	0.389	0.105	1
BC004004	0.0395564	2.51722	0.389	0.105	1
Eapp	0.0404652	2.23685	0.444	0.158	1
Fign	0.0408477	-2.27395	0.056	0.316	1
Tfpi	0.0408477	-2.33722	0.056	0.316	1
Tm7sf3	0.0408477	-2.48994	0.056	0.316	1
Scaper	0.0408477	-2.44094	0.056	0.316	1
Cd300lg	0.0408477	-2.58114	0.056	0.316	1
Bace2	0.0413698	-1.29615	0.056	0.421	1
Atp6v0a2	0.0413698	-1.2676	0.111	0.421	1
Rnf13	0.0415328	-2.48009	0.111	0.368	1
H2-Q7	0.0423308	1.85682	0.667	0.421	1
Pdcd6ip	0.0425977	-1.54173	0.167	0.474	1
Tmed7	0.0425977	-1.37597	0.167	0.474	1
Tmod2	0.0425977	-1.88194	0.167	0.421	1
mt-Nd4l	0.0428224	-2.12784	0.611	0.842	1
Gm12216	0.0430893	2.31121	0.333	0.053	1
Mrps5	0.0435922	2.1517	0.389	0.105	1
Nsmce1	0.0435922	3.02422	0.389	0.105	1
Rac1	0.0437153	-0.978254	0.611	0.789	1
Ubl7	0.0442861	2.41004	0.444	0.158	1
Slc25a5	0.0450565	-1.44426	0.222	0.526	1
Eif4h	0.0451694	1.63282	0.556	0.368	1
Nck2	0.0454048	-3.15871	0	0.211	1
Ipo9	0.0454048	-3.93101	0	0.211	1
Soat1	0.0454048	-2.51814	0	0.211	1
Plekha3	0.0454048	-2.88851	0	0.211	1
Pex16	0.0454048	-2.68255	0	0.211	1
Ddx27	0.0454048	-3.15329	0	0.211	1
Mtm1	0.0454048	-2.54949	0	0.211	1
Chm	0.0454048	-2.97449	0	0.211	1
Bche	0.0454048	-2.54388	0	0.211	1
Snx27	0.0454048	-2.60531	0	0.211	1
Gstm5	0.0454048	-2.36491	0	0.211	1
Pgm1	0.0454048	-2.76834	0	0.211	1
C1qc	0.0454048	-3.62872	0	0.211	1
Hsd17b11	0.0454048	-3.88107	0	0.211	1
Mios	0.0454048	-3.40885	0	0.211	1
Ccdc126	0.0454048	-2.95082	0	0.211	1
Xpc	0.0454048	-2.58805	0	0.211	1
Eif4e3	0.0454048	-2.75529	0	0.211	1
Tubgcp5	0.0454048	-3.23436	0	0.211	1
Ctsc	0.0454048	-4.18051	0	0.211	1
Tspan15	0.0454048	-4.80759	0	0.211	1
Prdm4	0.0454048	-3.65432	0	0.211	1
Tmtc3	0.0454048	-2.74855	0	0.211	1
Mettl1	0.0454048	-2.64141	0	0.211	1
Pcid2	0.0454048	-2.61799	0	0.211	1
Nid2	0.0454048	-3.00849	0	0.211	1
Chmp7	0.0454048	-2.68455	0	0.211	1
Ednrb	0.0454048	-3.26397	0	0.211	1
Abcc4	0.0454048	-2.78247	0	0.211	1
Tbcel	0.0454048	-2.74046	0	0.211	1
Pml	0.0454048	-2.63869	0	0.211	1
Rai1	0.0454048	-2.8805	0	0.211	1
Tmem98	0.0454048	-3.06315	0	0.211	1
Aoc3	0.0454048	-4.74155	0	0.211	1
Atxn7l3	0.0454048	-2.83756	0	0.211	1
Pde4d	0.0454048	-3.30826	0	0.211	1
Atxn3	0.0454048	-2.69246	0	0.211	1
Trio	0.0454048	-2.59459	0	0.211	1
Gart	0.0454048	-3.76546	0	0.211	1
C4b	0.0454048	-3.3809	0	0.211	1
Nfya	0.0454048	-2.70628	0	0.211	1
Pik3c3	0.0454048	-3.34214	0	0.211	1
Hars2	0.0454048	-2.42009	0	0.211	1
Grk5	0.0454048	-2.70016	0	0.211	1
Cfh	0.0455289	-1.20403	0.278	0.579	1
Rcbtb2	0.04647	-2.03757	0.167	0.474	1
Klf2	0.0472775	2.21365	0.667	0.579	1
Micu1	0.0478853	1.542	0.333	0.053	1
Oaz2	0.0479703	1.45071	0.389	0.105	1
Asap1	0.048062	-1.60421	0.333	0.632	1
Hjurp	0.0489218	1.98381	0.5	0.263	1
Eid1	0.049523	-0.905114	0.611	0.842	1
Rhob	0.049523	1.16111	0.833	0.632	1
Mtss1	0.0497511	-1.97117	0.111	0.421	1
Magt1	0.0502944	-2.83624	0.111	0.368	1
Pisd	0.0502944	-2.33676	0.111	0.368	1
Atp2c1	0.0502944	-2.29341	0.111	0.368	1
Nlk	0.0502944	-2.10202	0.111	0.368	1
Mdfic	0.0504468	-3.08607	0.056	0.316	1
Parvb	0.0504468	-1.94965	0.056	0.316	1
Ndufa12	0.0506949	1.63847	0.667	0.368	1
Eef2	0.0516653	0.449676	0.944	0.842	1
Ssr2	0.0521595	-2.56043	0.222	0.474	1
Ndufs6	0.0521944	0.844302	0.778	0.526	1
Nudt21	0.0527122	1.90004	0.389	0.105	1
Dph3	0.0527122	2.43402	0.389	0.105	1
Usp7	0.0527122	1.65623	0.389	0.105	1
Synj2bp	0.0543545	1.65918	0.5	0.211	1
Top2b	0.0548198	1.67773	0.611	0.316	1
Hmgb1	0.0550659	-0.532564	0.833	0.842	1
Anapc16	0.055107	-1.34415	0.167	0.474	1
Rnpep	0.0551892	-2.27667	0.167	0.421	1
St6galnac4	0.0552115	2.90796	0.278	0.053	1
Nceh1	0.0552115	3.93705	0.278	0.053	1
Fbxw9	0.0552115	2.47775	0.278	0.053	1
Abhd5	0.0552115	3.13902	0.278	0.053	1
Ryk	0.0552263	-2.66024	0.111	0.368	1
Id1	0.0557696	1.2727	0.833	0.684	1
Cyp4b1	0.0559149	-1.48618	0.056	0.316	1
Nrp2	0.0559442	-1.16191	0.333	0.632	1
Rps10	0.0567133	-0.666535	0.778	0.842	1
Rpl17	0.0572452	0.675057	0.889	0.842	1
Cox5b	0.0572629	0.91524	0.778	0.579	1
Rapgef6	0.0575766	2.48247	0.556	0.316	1
Ube2d2a	0.057782	1.44628	0.556	0.263	1
Mprip	0.0588307	-1.00944	0.333	0.684	1
Fxyd5	0.059416	-0.774308	0.833	0.947	1
Lsm7	0.0595122	-1.68454	0.111	0.421	1
Adgra2	0.0595122	-1.3778	0.111	0.421	1
Nxpe2	0.0595122	-1.60584	0.111	0.421	1
Ifi47	0.0595122	-1.16218	0.111	0.421	1
Ptms	0.0598052	0.803036	0.833	0.684	1
Lamb1	0.0602724	-1.53182	0.333	0.632	1
Crlf2	0.0604523	2.96273	0.333	0.105	1
Scamp1	0.0605549	-2.41639	0.111	0.368	1
Atf7	0.0605549	-2.49151	0.111	0.368	1
Ifitm2	0.0613436	0.708623	0.944	0.789	1
Kdr	0.0614306	-0.93024	0.556	0.789	1
Gmfg	0.061502	2.4433	0.278	0.053	1
Wdr37	0.061502	2.27992	0.278	0.053	1
Minpp1	0.061502	2.58109	0.278	0.053	1
Proser2	0.0618681	-1.43585	0.056	0.316	1
Fbn1	0.0618681	-1.68556	0.056	0.316	1
Fam32a	0.0618681	-1.36497	0.056	0.316	1
Myzap	0.0618681	-1.57707	0.056	0.316	1
Togaram1	0.0618681	-1.61557	0.056	0.316	1
Tubb6	0.0618681	-1.28928	0.056	0.316	1
Drap1	0.0621395	-1.83413	0.278	0.579	1
Cmtm8	0.0622222	-1.56441	0.222	0.526	1
Wac	0.0622222	-1.49675	0.222	0.526	1
Ctsz	0.0632887	0.835723	0.667	0.368	1
Arpc5	0.0637271	-1.02617	0.278	0.632	1
Lama4	0.0650428	-1.45597	0.167	0.474	1
Ssb	0.0652967	0.941133	0.722	0.526	1
Rab3gap1	0.065447	-2.05766	0.167	0.421	1
Ralgds	0.065447	-1.82038	0.167	0.421	1
Naa38	0.065447	-1.67723	0.167	0.421	1
Afdn	0.0656203	-1.44568	0.389	0.632	1
Cracr2b	0.065806	1.0528	0.722	0.474	1
Bms1	0.0663027	-2.02247	0.111	0.368	1
Amfr	0.0663027	-2.71291	0.111	0.368	1
Cartpt	0.0663386	4.74167	0.278	0	1
Sh3bp4	0.0664628	2.04713	0.333	0.105	1
Tap1	0.0664628	2.50985	0.333	0.105	1
Tpm1	0.0669976	-1.27668	0.278	0.579	1
Tm2d2	0.0672717	-1.12067	0.222	0.526	1
Elk4	0.0672717	2.56821	0.5	0.263	1
Baz2b	0.0672717	-1.65688	0.278	0.474	1
Rpl23a	0.067699	-0.735956	0.833	0.842	1
Wapl	0.0682437	1.54424	0.444	0.158	1
Gulp1	0.0683364	-1.37594	0.056	0.316	1
Bik	0.0683364	-0.511575	0.056	0.316	1
Nrip1	0.0683364	-0.797451	0.056	0.316	1
Timm8a1	0.0683745	2.00829	0.278	0.053	1
Ciart	0.0683745	2.19078	0.278	0.053	1
Cttnbp2nl	0.0683745	1.88865	0.278	0.053	1
Gja4	0.0683745	2.45563	0.278	0.053	1
Tufm	0.0683745	1.93131	0.278	0.053	1
Pck2	0.0683745	2.18762	0.278	0.053	1
Rpain	0.0683745	1.88592	0.278	0.053	1
Ptrh2	0.0683745	2.50187	0.278	0.053	1
Mrps23	0.0683745	2.32566	0.278	0.053	1
Slc45a4	0.0683745	3.05125	0.278	0.053	1
Ring1	0.0683745	2.55971	0.278	0.053	1
Morf4l1	0.0686044	0.808923	0.889	0.632	1
Ubald2	0.0692001	0.896998	0.5	0.211	1
Rpn1	0.0705397	-1.22754	0.167	0.474	1
Anxa11	0.0705397	-0.859567	0.167	0.474	1
Nab1	0.0708116	2.00486	0.389	0.158	1
Slco2a1	0.0708487	-1.60975	0.389	0.684	1
Pear1	0.0711379	-1.86081	0.167	0.421	1
Ppp1r11	0.0711379	-1.80132	0.167	0.421	1
Srsf5	0.0716598	1.42669	0.778	0.632	1
Sod1	0.0716598	1.01548	0.778	0.632	1
Zbtb37	0.0723236	2.02311	0.167	0	1
Thnsl1	0.0723236	2.81325	0.167	0	1
Nacc2	0.0723236	1.63797	0.167	0	1
Qsox2	0.0723236	2.8758	0.167	0	1
Med27	0.0723236	3.62369	0.167	0	1
Dolk	0.0723236	2.10414	0.167	0	1
Tor1a	0.0723236	2.30828	0.167	0	1
Pdk1	0.0723236	4.00898	0.167	0	1
C1qtnf4	0.0723236	3.80581	0.167	0	1
Accs	0.0723236	2.48653	0.167	0	1
Cstf3	0.0723236	2.83945	0.167	0	1
Hdc	0.0723236	3.03067	0.167	0	1
Tmem127	0.0723236	3.1298	0.167	0	1
Snta1	0.0723236	2.60779	0.167	0	1
Ube2v1	0.0723236	2.92651	0.167	0	1
Zbp1	0.0723236	4.50991	0.167	0	1
Cables2	0.0723236	2.15083	0.167	0	1
Ogfr	0.0723236	3.90416	0.167	0	1
Polr3k	0.0723236	3.03542	0.167	0	1
Gripap1	0.0723236	2.1205	0.167	0	1
Pqbp1	0.0723236	2.60477	0.167	0	1
Rbmx2	0.0723236	2.8255	0.167	0	1
Cetn4	0.0723236	2.50041	0.167	0	1
Sclt1	0.0723236	2.84088	0.167	0	1
Smg5	0.0723236	2.08902	0.167	0	1
Wdr47	0.0723236	2.83667	0.167	0	1
Fam241a	0.0723236	2.57988	0.167	0	1
Ankrd13c	0.0723236	4.9232	0.167	0	1
Fancg	0.0723236	3.18287	0.167	0	1
Ptpn3	0.0723236	2.78474	0.167	0	1
Megf9	0.0723236	2.91903	0.167	0	1
Slc35d1	0.0723236	3.22745	0.167	0	1
Mknk1	0.0723236	2.9732	0.167	0	1
Ccdc163	0.0723236	2.83817	0.167	0	1
Toe1	0.0723236	2.85023	0.167	0	1
Dmap1	0.0723236	3.77556	0.167	0	1
Mfsd2a	0.0723236	3.77167	0.167	0	1
Map3k6	0.0723236	3.42841	0.167	0	1
Zfp46	0.0723236	2.70122	0.167	0	1
Noc2l	0.0723236	2.90733	0.167	0	1
Fndc4	0.0723236	3.26757	0.167	0	1
Tbc1d19	0.0723236	2.77254	0.167	0	1
Fgfrl1	0.0723236	2.79557	0.167	0	1
Ficd	0.0723236	2.45198	0.167	0	1
Mlxip	0.0723236	1.95052	0.167	0	1
Rilpl2	0.0723236	2.96438	0.167	0	1
Slc12a9	0.0723236	1.63067	0.167	0	1
Cyth3	0.0723236	4.10683	0.167	0	1
Usp42	0.0723236	2.84592	0.167	0	1
Lmtk2	0.0723236	3.20815	0.167	0	1
Zkscan14	0.0723236	2.09683	0.167	0	1
Klhdc10	0.0723236	2.93002	0.167	0	1
Ptcd3	0.0723236	3.28533	0.167	0	1
Gcfc2	0.0723236	3.88532	0.167	0	1
Exoc6b	0.0723236	3.11495	0.167	0	1
Itfg2	0.0723236	2.63547	0.167	0	1
Zfp524	0.0723236	2.9599	0.167	0	1
Inafm1	0.0723236	3.59176	0.167	0	1
Map3k10	0.0723236	2.53667	0.167	0	1
Dyrk1b	0.0723236	3.9771	0.167	0	1
Pdcd2l	0.0723236	2.17498	0.167	0	1
Dhdh	0.0723236	1.83545	0.167	0	1
Hps5	0.0723236	3.31858	0.167	0	1
Mtmr10	0.0723236	2.25112	0.167	0	1
Acer3	0.0723236	4.6964	0.167	0	1
Apbb1	0.0723236	1.97039	0.167	0	1
Mical2	0.0723236	2.20753	0.167	0	1
Chid1	0.0723236	2.41568	0.167	0	1
Rmnd1	0.0723236	2.48414	0.167	0	1
Adat2	0.0723236	4.01076	0.167	0	1
Ado	0.0723236	3.02638	0.167	0	1
Xab2	0.0723236	2.8875	0.167	0	1
Galnt7	0.0723236	1.88168	0.167	0	1
Clgn	0.0723236	2.65064	0.167	0	1
Dhps	0.0723236	2.06086	0.167	0	1
Ces2g	0.0723236	2.80829	0.167	0	1
Dynlrb2	0.0723236	3.63344	0.167	0	1
Kctd6	0.0723236	2.82607	0.167	0	1
Gnpnat1	0.0723236	2.99959	0.167	0	1
Polr3d	0.0723236	3.71258	0.167	0	1
Dmtn	0.0723236	2.81352	0.167	0	1
Serp2	0.0723236	1.95874	0.167	0	1
Rap2a	0.0723236	3.16134	0.167	0	1
Zfp26	0.0723236	2.14679	0.167	0	1
Acad8	0.0723236	2.4866	0.167	0	1
Parp6	0.0723236	2.39421	0.167	0	1
Hyal1	0.0723236	1.6321	0.167	0	1
Qars	0.0723236	2.89973	0.167	0	1
Tbc1d10a	0.0723236	3.72471	0.167	0	1
Mpg	0.0723236	1.6302	0.167	0	1
Ubtd2	0.0723236	2.21744	0.167	0	1
Tgtp2	0.0723236	3.27654	0.167	0	1
Pmp22	0.0723236	2.44348	0.167	0	1
Cyb5d2	0.0723236	2.0994	0.167	0	1
Abr	0.0723236	3.98049	0.167	0	1
P3h4	0.0723236	2.2165	0.167	0	1
Gga3	0.0723236	2.82797	0.167	0	1
Tmem94	0.0723236	3.01386	0.167	0	1
H4c3	0.0723236	1.82118	0.167	0	1
Habp4	0.0723236	3.33022	0.167	0	1
Btbd6	0.0723236	3.11572	0.167	0	1
Zfp386	0.0723236	2.87988	0.167	0	1
Wdyhv1	0.0723236	2.0061	0.167	0	1
Pla2g6	0.0723236	2.92309	0.167	0	1
Csrnp2	0.0723236	2.11502	0.167	0	1
Fetub	0.0723236	3.76489	0.167	0	1
Senp5	0.0723236	2.7734	0.167	0	1
Dop1b	0.0723236	3.31437	0.167	0	1
Vps26c	0.0723236	2.64939	0.167	0	1
Zfp52	0.0723236	3.45943	0.167	0	1
Kctd5	0.0723236	2.1283	0.167	0	1
Amdhd2	0.0723236	2.13693	0.167	0	1
Haghl	0.0723236	2.60526	0.167	0	1
H2-DMa	0.0723236	2.40214	0.167	0	1
Rsph9	0.0723236	2.51172	0.167	0	1
Dpp9	0.0723236	2.99106	0.167	0	1
Kdm5d	0.0723236	2.73618	0.167	0	1
Uty	0.0723236	3.23452	0.167	0	1
Osbpl1a	0.0723236	3.40519	0.167	0	1
Gramd3	0.0723236	2.78709	0.167	0	1
Isoc1	0.0723236	2.67845	0.167	0	1
Snx32	0.0723236	4.60583	0.167	0	1
Scyl1	0.0723236	3.56122	0.167	0	1
Cutc	0.0723236	2.72808	0.167	0	1
Kazald1	0.0723236	3.26891	0.167	0	1
Afap1l2	0.0723236	3.33166	0.167	0	1
Trub1	0.0723236	2.84639	0.167	0	1
Snca	0.0723236	1.47269	0.111	0	1
Abi3bp	0.0723236	2.74689	0.111	0	1
mt-Nd6	0.0724926	-2.61301	0.111	0.368	1
Creg1	0.0726536	2.47118	0.5	0.263	1
Ppa2	0.0729571	2.34761	0.333	0.105	1
Grcc10	0.0729571	1.99328	0.333	0.105	1
Sirt7	0.0729571	2.11469	0.333	0.105	1
Uchl1	0.073868	4.0267	0.333	0.105	1
Trafd1	0.0748338	0.939584	0.5	0.211	1
Anxa7	0.0749498	1.43752	0.611	0.368	1
Aplp2	0.0751182	0.740554	0.889	0.842	1
Mrps24	0.0754539	-1.74472	0.278	0.526	1
Hspg2	0.0754635	-1.16194	0.556	0.789	1
Nifk	0.0758661	1.59853	0.278	0.053	1
Ckap5	0.0758661	2.0084	0.278	0.053	1
Lrrc57	0.0758661	2.08199	0.278	0.053	1
Ube3c	0.0758661	2.03069	0.278	0.053	1
Fscn1	0.0758661	1.94015	0.278	0.053	1
Wtip	0.0758661	2.32936	0.278	0.053	1
Mau2	0.0758661	2.07079	0.278	0.053	1
Fyco1	0.0758661	2.32007	0.278	0.053	1
Jade2	0.0758661	1.81405	0.278	0.053	1
Dhrs7b	0.0758661	2.18135	0.278	0.053	1
Wrnip1	0.0758661	1.92455	0.278	0.053	1
Ncaph2	0.0758661	3.56663	0.278	0.053	1
Slc39a13	0.0758661	-2.86166	0.056	0.263	1
Mad2l2	0.0758661	-2.67107	0.056	0.263	1
Smim20	0.0758661	-3.11661	0.056	0.263	1
Slc37a3	0.0758661	-2.77294	0.056	0.263	1
Necap1	0.0758661	-2.5851	0.056	0.263	1
Lemd3	0.0758661	-2.14593	0.056	0.263	1
Trappc11	0.0758661	-1.94684	0.056	0.263	1
Slc12a4	0.0758661	-2.71719	0.056	0.263	1
Ist1	0.0758661	-3.0301	0.056	0.263	1
Ugp2	0.0758661	-2.74949	0.056	0.263	1
Cdyl	0.0758661	-2.24446	0.056	0.263	1
Tgfbi	0.0758661	-3.5019	0.056	0.263	1
Cpsf2	0.0758661	-3.04969	0.056	0.263	1
Gga1	0.0758661	-2.46299	0.056	0.263	1
Enpp4	0.0758661	-3.54746	0.056	0.263	1
Imp3	0.0759848	0.84554	0.667	0.421	1
Pdzd2	0.0764119	2.07819	0.444	0.211	1
Mtch1	0.0766468	-0.764147	0.556	0.842	1
Kif1b	0.0770893	-1.01092	0.111	0.421	1
Mib1	0.0772281	-1.779	0.167	0.421	1
Psmc5	0.0783831	-1.17563	0.222	0.526	1
Dynll1	0.0790869	-0.815548	0.778	0.789	1
Rbbp8	0.0791478	-1.55373	0.111	0.368	1
Ube2f	0.0799616	2.08974	0.333	0.105	1
Ppp3cc	0.0799616	2.25562	0.333	0.105	1
Dgkh	0.0799616	2.09893	0.333	0.105	1
Birc2	0.0799616	2.27756	0.333	0.105	1
Vamp2	0.0799616	3.09671	0.333	0.105	1
Eif4a3	0.0799616	1.88812	0.333	0.105	1
Fra10ac1	0.0799616	2.79096	0.333	0.105	1
Atp6v0e	0.0804473	-0.954866	0.333	0.632	1
March2	0.0804473	-0.92554	0.333	0.632	1
Ube2n	0.0804473	1.41861	0.611	0.368	1
Anapc5	0.0811393	1.53453	0.611	0.421	1
Ext2	0.0812448	-2.33631	0.278	0.526	1
B230219D22Rik	0.0821749	-1.00916	0.333	0.579	1
Tgfb1	0.0826767	0.667972	0.167	0.474	1
Napa	0.0826767	2.96345	0.444	0.211	1
Wbp11	0.0834762	-1.01001	0.278	0.579	1
Bax	0.0834762	1.53833	0.556	0.316	1
Cycs	0.0837367	-1.52004	0.167	0.421	1
Crtap	0.0837367	-1.72261	0.167	0.421	1
Smarcd2	0.0838132	2.29853	0.389	0.158	1
Nek7	0.0839815	-1.49695	0.222	0.474	1
Papss1	0.0839815	-1.42777	0.222	0.474	1
Cfdp1	0.0839815	-1.85464	0.222	0.474	1
Kdm1a	0.0840144	1.26896	0.278	0.053	1
Plpbp	0.0840144	1.66396	0.278	0.053	1
Zfpm1	0.0840144	1.72132	0.278	0.053	1
Ddx52	0.0840144	1.57194	0.278	0.053	1
Sptlc1	0.0840144	1.55635	0.278	0.053	1
Casp8ap2	0.0840144	-2.5134	0.056	0.263	1
Ccdc90b	0.0840144	-3.0346	0.056	0.263	1
Gfod2	0.0840144	-2.26796	0.056	0.263	1
Fem1b	0.0840144	-1.86582	0.056	0.263	1
Ggps1	0.0840144	-2.07834	0.056	0.263	1
Ophn1	0.0840144	-2.27362	0.056	0.211	1
D8Ertd738e	0.0841396	-1.45244	0.444	0.684	1
Guk1	0.0844749	1.35061	0.5	0.263	1
Serpinb6a	0.0846941	1.12819	0.722	0.579	1
mt-Nd2	0.0860052	-1.73228	0.944	1	1
Hip1	0.0862679	-0.775192	0.333	0.632	1
Pnkd	0.0862679	1.11665	0.611	0.368	1
Eif1ax	0.0862916	-1.61471	0.111	0.368	1
Snx3	0.0865382	-1.07656	0.444	0.737	1
Rexo2	0.0869307	1.81395	0.611	0.421	1
Eif3h	0.0871682	-0.995878	0.389	0.684	1
Ctsl	0.0874693	-1.01381	0.556	0.842	1
Vps4b	0.0875032	2.35955	0.333	0.105	1
Chd6	0.0875032	2.54817	0.333	0.105	1
Tet2	0.0875032	1.80212	0.333	0.105	1
Ppp1r35	0.0875032	1.84924	0.333	0.105	1
Samm50	0.0875032	2.28695	0.333	0.105	1
Mfap1a	0.0875032	-3.00472	0.111	0.316	1
Mpv17	0.0875032	-2.08049	0.111	0.316	1
Vcl	0.0875032	-3.75785	0.111	0.316	1
Ndufb8	0.0886361	1.2391	0.667	0.579	1
Col3a1	0.0889799	-4.45583	0	0.158	1
Pid1	0.0889799	-2.31879	0	0.158	1
Slc35f5	0.0889799	-1.98595	0	0.158	1
Zfp281	0.0889799	-2.45033	0	0.158	1
Nr5a2	0.0889799	-2.7626	0	0.158	1
Abl2	0.0889799	-2.36823	0	0.158	1
Nme7	0.0889799	-3.41026	0	0.158	1
Rcsd1	0.0889799	-2.30696	0	0.158	1
Trp53bp2	0.0889799	-2.3606	0	0.158	1
Dclre1c	0.0889799	-2.17841	0	0.158	1
Tmem203	0.0889799	-2.42744	0	0.158	1
Setx	0.0889799	-3.81718	0	0.158	1
Trub2	0.0889799	-3.45668	0	0.158	1
Lhx6	0.0889799	-2.69667	0	0.158	1
Agps	0.0889799	-2.18347	0	0.158	1
Kbtbd4	0.0889799	-2.5057	0	0.158	1
Pmepa1	0.0889799	-2.18619	0	0.158	1
Gm14295	0.0889799	-2.19986	0	0.158	1
Fam217b	0.0889799	-2.67955	0	0.158	1
Wdr13	0.0889799	-1.90306	0	0.158	1
Tspan7	0.0889799	-4.56725	0	0.158	1
Zdhhc9	0.0889799	-3.43693	0	0.158	1
Nexmif	0.0889799	-1.98162	0	0.158	1
Magee1	0.0889799	-3.38324	0	0.158	1
Mbtps2	0.0889799	-2.31305	0	0.158	1
Fat4	0.0889799	-2.12318	0	0.158	1
Sf3b4	0.0889799	-3.47559	0	0.158	1
Miga1	0.0889799	-2.26415	0	0.158	1
Fktn	0.0889799	-2.60797	0	0.158	1
Fkbp15	0.0889799	-4.39997	0	0.158	1
Tusc1	0.0889799	-2.47617	0	0.158	1
Mast2	0.0889799	-2.23795	0	0.158	1
Tmem39b	0.0889799	-2.15667	0	0.158	1
Emc1	0.0889799	-3.85579	0	0.158	1
Zfp513	0.0889799	-1.85984	0	0.158	1
Nsd2	0.0889799	-2.14089	0	0.158	1
Fam193a	0.0889799	-2.65363	0	0.158	1
Usp46	0.0889799	-2.63675	0	0.158	1
Sart3	0.0889799	-2.66713	0	0.158	1
Kdm2b	0.0889799	-2.05151	0	0.158	1
Mettl27	0.0889799	-2.16124	0	0.158	1
3110082I17Rik	0.0889799	-2.05217	0	0.158	1
Col1a2	0.0889799	-5.84866	0	0.158	1
Rnf181	0.0889799	-2.01422	0	0.158	1
Dera	0.0889799	-2.47645	0	0.158	1
Ttc23	0.0889799	-2.74892	0	0.158	1
Me3	0.0889799	-2.23099	0	0.158	1
Clpb	0.0889799	-3.34639	0	0.158	1
Cog7	0.0889799	-2.93855	0	0.158	1
Inpp5f	0.0889799	-2.77728	0	0.158	1
Inpp5a	0.0889799	-2.79481	0	0.158	1
Specc1l	0.0889799	-1.87589	0	0.158	1
1600002K03Rik	0.0889799	-1.82432	0	0.158	1
Apba3	0.0889799	-3.2544	0	0.158	1
D10Wsu102e	0.0889799	-1.93596	0	0.158	1
Dcn	0.0889799	-4.69021	0	0.158	1
Rbms2	0.0889799	-2.36449	0	0.158	1
Ing2	0.0889799	-3.30273	0	0.158	1
Sap30	0.0889799	-1.83069	0	0.158	1
Naf1	0.0889799	-1.60954	0	0.158	1
Hmox1	0.0889799	-2.14064	0	0.158	1
Zswim4	0.0889799	-2.3406	0	0.158	1
G430095P16Rik	0.0889799	-2.97598	0	0.158	1
Slc7a6	0.0889799	-3.01374	0	0.158	1
Def8	0.0889799	-3.46222	0	0.158	1
Adk	0.0889799	-2.38178	0	0.158	1
Peli2	0.0889799	-2.60522	0	0.158	1
Naa16	0.0889799	-2.27322	0	0.158	1
Vps26b	0.0889799	-2.33395	0	0.158	1
Hyou1	0.0889799	-2.65935	0	0.158	1
Apoa1	0.0889799	-2.82813	0	0.158	1
Ptpn9	0.0889799	-2.96781	0	0.158	1
Prtg	0.0889799	-4.28792	0	0.158	1
Pccb	0.0889799	-2.43513	0	0.158	1
Nudt16	0.0889799	-2.27428	0	0.158	1
Efemp1	0.0889799	-3.96185	0	0.158	1
Cpeb4	0.0889799	-2.50856	0	0.158	1
Ntn1	0.0889799	-2.70515	0	0.158	1
Cxcl16	0.0889799	-1.78719	0	0.158	1
Tada2a	0.0889799	-2.19319	0	0.158	1
Col1a1	0.0889799	-6.34337	0	0.158	1
Dcakd	0.0889799	-1.99467	0	0.158	1
Akr1c14	0.0889799	-3.10262	0	0.158	1
Cdkal1	0.0889799	-2.35718	0	0.158	1
Iars	0.0889799	-1.96913	0	0.158	1
Zfp712	0.0889799	-2.51403	0	0.158	1
Rasgrf2	0.0889799	-2.67998	0	0.158	1
Msh3	0.0889799	-2.87963	0	0.158	1
Mrps27	0.0889799	-3.8156	0	0.158	1
Mier3	0.0889799	-2.19519	0	0.158	1
Itga2	0.0889799	-2.96477	0	0.158	1
Prkar2b	0.0889799	-2.47773	0	0.158	1
Ttc9	0.0889799	-2.99753	0	0.158	1
Prkaa1	0.0889799	-2.5582	0	0.158	1
Dgat1	0.0889799	-2.44896	0	0.158	1
Lrrc14	0.0889799	-1.66976	0	0.158	1
5031439G07Rik	0.0889799	-2.53069	0	0.158	1
Lrrk2	0.0889799	-2.59161	0	0.158	1
Acvr1b	0.0889799	-2.12045	0	0.158	1
Coro7	0.0889799	-1.78771	0	0.158	1
Snai2	0.0889799	-1.80397	0	0.158	1
Tbccd1	0.0889799	-1.9935	0	0.158	1
Gtpbp8	0.0889799	-1.82643	0	0.158	1
Map3k4	0.0889799	-2.17571	0	0.158	1
Spaca6	0.0889799	-2.3897	0	0.158	1
Tnfrsf12a	0.0889799	-2.50256	0	0.158	1
Neurl1b	0.0889799	-2.48755	0	0.158	1
Ergic1	0.0889799	-2.05847	0	0.158	1
Zfp955a	0.0889799	-2.47845	0	0.158	1
Mdc1	0.0889799	-2.71616	0	0.158	1
Pot1b	0.0889799	-2.73756	0	0.158	1
Mllt1	0.0889799	-2.09538	0	0.158	1
Rab31	0.0889799	-1.83156	0	0.158	1
Mtpap	0.0889799	-2.34095	0	0.158	1
Pdgfrb	0.0889799	-4.23826	0	0.158	1
Pcyox1l	0.0889799	-2.22113	0	0.158	1
Acsl5	0.0889799	-1.97942	0	0.158	1
Ddx21	0.0893516	-0.28312	0.167	0.474	1
Coq10b	0.0893516	2.39971	0.444	0.211	1
Dhrs7	0.0893516	1.55674	0.444	0.211	1
Cd93	0.0893955	-0.87486	0.611	0.895	1
Lsm4	0.0896487	1.2441	0.556	0.316	1
E2f4	0.0900541	0.562725	0.389	0.105	1
Itih5	0.0900887	-0.80882	0.667	0.895	1
Degs1	0.0905683	-1.79894	0.222	0.474	1
Cenpb	0.0906824	-1.08424	0.167	0.421	1
Lamtor3	0.0906824	-1.47998	0.167	0.421	1
Csrp1	0.0909443	1.91276	0.5	0.263	1
Skil	0.0909443	1.4972	0.5	0.263	1
Ube2e3	0.0909443	-2.52184	0.278	0.474	1
Casp8	0.0910043	2.08011	0.389	0.158	1
Dcaf8	0.0910043	2.02534	0.389	0.158	1
Slc30a1	0.0910043	2.0503	0.389	0.158	1
Ube4a	0.0910043	1.85404	0.389	0.158	1
Alas1	0.0910043	2.48534	0.389	0.158	1
Hspa8	0.0910318	0.545216	0.889	0.789	1
Ythdf1	0.0928571	-1.94644	0.056	0.263	1
Gata2	0.0928571	-2.15837	0.056	0.263	1
Nop16	0.0928571	-1.6427	0.056	0.263	1
Endou	0.0928571	-1.95152	0.056	0.263	1
Akap8	0.0928571	-2.21387	0.056	0.263	1
Cpe	0.0932386	-0.779785	0.389	0.684	1
Ddx46	0.0939076	1.3777	0.5	0.316	1
Acsl4	0.0939474	-1.10464	0.111	0.368	1
Wls	0.0939474	-1.22611	0.111	0.368	1
Arhgef2	0.0940141	1.12719	0.5	0.211	1
Abcb1a	0.0944714	-0.214769	0.833	0.947	1
Emcn	0.0953178	-0.728431	0.667	0.842	1
Stim2	0.0956084	2.39645	0.333	0.105	1
Pigt	0.0956084	-2.65586	0.111	0.316	1
Prkar2a	0.0956084	-1.65075	0.111	0.316	1
Trabd	0.0956084	-2.28673	0.111	0.316	1
Selenof	0.0965914	0.41149	0.889	0.737	1
Igfbp4	0.0965914	1.34499	0.889	0.737	1
Ctla2a	0.0970091	-0.295351	0.778	0.895	1
Mtln	0.0975644	-1.74881	0.222	0.474	1
Cd63	0.0975644	-2.3795	0.222	0.474	1
Mdh1	0.0975644	2.30958	0.444	0.263	1
Clca3a1	0.0978063	1.25752	0.5	0.263	1
Rnf10	0.0978063	1.64837	0.5	0.263	1
Tiprl	0.0986834	1.56306	0.389	0.158	1
Epn1	0.0986834	1.75211	0.389	0.158	1
Timm44	0.0986834	2.17397	0.389	0.158	1
Dicer1	0.0986834	2.24278	0.389	0.158	1
Ankrd17	0.0986834	-2.00951	0.167	0.368	1
Angpt2	0.0986834	-1.83914	0.167	0.368	1
Mpc2	0.0987281	0.790629	0.667	0.526	1
Nr2f2	0.0989281	-0.914013	0.389	0.579	1
Ssu72	0.0989281	1.21529	0.556	0.421	1
Atp5g2	0.0994926	0.603055	0.722	0.684	1
Gnas	0.100113	-0.451413	0.833	0.842	1
Brd7	0.100808	-0.89141	0.278	0.526	1
Rbm26	0.101221	1.14891	0.5	0.211	1
Edn1	0.101239	1.71559	0.556	0.368	1
Upp2	0.102139	-0.153355	0.111	0.368	1
Camk2n1	0.102139	-1.16043	0.111	0.368	1
Cat	0.102432	-1.75493	0.056	0.263	1
Gabpb1	0.102432	-1.53572	0.056	0.263	1
Msl2	0.102432	-1.68663	0.056	0.263	1
Cbll1	0.102432	-2.18157	0.056	0.263	1
Ppm1f	0.102432	-2.07898	0.056	0.263	1
Pgm5	0.102432	-1.6703	0.056	0.263	1
Pdcd11	0.102432	-2.00014	0.056	0.263	1
Psenen	0.102662	-1.21613	0.444	0.684	1
Ube2l6	0.104304	1.73108	0.333	0.105	1
Ube4b	0.104304	1.4521	0.333	0.105	1
Ndufaf2	0.104304	1.42663	0.333	0.105	1
Arl6	0.104304	1.4891	0.333	0.105	1
Akap8l	0.104304	1.4056	0.333	0.105	1
Ctsf	0.104304	1.71271	0.333	0.105	1
Tifa	0.104304	-2.32538	0.111	0.316	1
Sgcb	0.104304	-1.81234	0.111	0.316	1
Golga3	0.104304	-2.77738	0.111	0.316	1
Frmd4b	0.104304	-1.75011	0.111	0.316	1
Emc8	0.104304	-2.96675	0.111	0.316	1
Tmem167	0.104986	-1.0832	0.222	0.474	1
Tbcb	0.105076	0.82884	0.556	0.211	1
Gbp3	0.105076	2.04095	0.5	0.263	1
Tmem234	0.105318	-0.849568	0.444	0.737	1
Reep3	0.105318	-0.89561	0.444	0.737	1
Ier2	0.105318	1.59172	0.667	0.526	1
Gpi1	0.105792	0.692748	0.611	0.368	1
Hprt	0.105792	-1.30564	0.389	0.579	1
Gbp2	0.105961	-1.92413	0.167	0.421	1
H2-Q4	0.106395	0.849566	0.667	0.421	1
Itsn2	0.106871	2.30489	0.389	0.158	1
Slc48a1	0.106871	2.09777	0.389	0.158	1
Prrc2b	0.109512	1.01572	0.667	0.474	1
Lgmn	0.109872	0.46977	0.667	0.368	1
Iqgap1	0.11022	0.920627	0.889	0.842	1
Gata3	0.110888	-1.09107	0.111	0.368	1
Tmod3	0.111095	-0.733239	0.5	0.737	1
Ash1l	0.112009	-1.48521	0.222	0.421	1
Luc7l2	0.112012	1.13819	0.611	0.316	1
Churc1	0.112768	2.18645	0.5	0.263	1
Phax	0.112768	1.37379	0.5	0.263	1
Prdm1	0.112776	-1.09326	0.056	0.263	1
Washc3	0.112776	-1.23544	0.056	0.263	1
Edc4	0.112776	-0.961177	0.056	0.263	1
Phf23	0.112776	-1.0864	0.056	0.263	1
Asah1	0.112849	1.42762	0.444	0.263	1
Fkbp9	0.113029	-1.32527	0.333	0.632	1
Atrx	0.113029	-1.57565	0.389	0.579	1
Zcrb1	0.113508	1.06144	0.611	0.421	1
Spr	0.113616	1.0042	0.333	0.105	1
Raf1	0.113616	1.37018	0.333	0.105	1
Wdr43	0.113616	1.72029	0.333	0.105	1
Trp53i11	0.113616	-2.34864	0.111	0.316	1
Lix1l	0.113616	-1.92079	0.111	0.316	1
Pigyl	0.113616	-1.86104	0.111	0.316	1
Ndufb6	0.114331	-1.35136	0.167	0.421	1
Zfp445	0.114331	-1.24092	0.167	0.421	1
Ide	0.114331	-1.06413	0.167	0.421	1
Upf1	0.115588	1.76046	0.389	0.158	1
Nme1	0.115588	1.31104	0.389	0.158	1
Abracl	0.115588	-2.17463	0.167	0.368	1
Golga7	0.115588	-1.7	0.167	0.368	1
Arpc3	0.115771	0.301192	0.889	0.684	1
Ddrgk1	0.115797	1.41497	0.556	0.368	1
Ecm1	0.115817	-1.9194	0.278	0.526	1
C1d	0.115817	1.94152	0.5	0.316	1
mt-Nd5	0.116382	-0.490486	0.722	0.895	1
Usp25	0.118095	-1.72793	0.333	0.526	1
Prom1	0.118912	3.62895	0.222	0	1
Msrb2	0.118912	2.22214	0.222	0.053	1
Prrg1	0.118912	2.17579	0.222	0.053	1
Las1l	0.118912	2.84966	0.222	0.053	1
Pla2g12a	0.118912	2.86564	0.222	0.053	1
Grhpr	0.118912	2.40366	0.222	0.053	1
Nfyc	0.118912	2.77624	0.222	0.053	1
Errfi1	0.118912	2.19965	0.222	0.053	1
Fes	0.118912	2.60643	0.222	0.053	1
Ppme1	0.118912	2.46873	0.222	0.053	1
Rrp8	0.118912	3.47412	0.222	0.053	1
Atp6v1b2	0.118912	2.48584	0.222	0.053	1
Aktip	0.118912	2.3389	0.222	0.053	1
Mphosph6	0.118912	3.52291	0.222	0.053	1
Phf7	0.118912	2.54933	0.222	0.053	1
Slc7a7	0.118912	2.90341	0.222	0.053	1
Acot13	0.118912	2.78389	0.222	0.053	1
Eif2ak2	0.118912	2.55425	0.222	0.053	1
Tmem252	0.118912	3.10883	0.222	0.053	1
Rbp1	0.11954	-0.920829	0.5	0.684	1
Cd55	0.120219	-0.682412	0.111	0.368	1
Ubl3	0.120497	1.4413	0.444	0.211	1
Tpi1	0.120497	1.55371	0.444	0.211	1
Sult1a1	0.120497	1.68189	0.444	0.211	1
Sap30l	0.120497	1.78931	0.444	0.211	1
Crebbp	0.120497	-1.54492	0.222	0.421	1
Rbm42	0.120897	1.73583	0.5	0.263	1
Pfn1	0.12216	-0.999077	0.611	0.737	1
Serf2	0.122209	0.683996	0.889	0.632	1
Jun	0.122209	1.05517	0.833	0.684	1
Rnase4	0.123213	-0.974397	0.111	0.421	1
Akap12	0.123571	0.745088	0.333	0.105	1
Fnta	0.123571	1.15689	0.333	0.105	1
Raph1	0.123571	-1.59104	0.111	0.316	1
Mid2	0.123571	-1.53953	0.111	0.316	1
Aph1a	0.123571	-1.76249	0.111	0.316	1
Dnajb4	0.123571	-1.69452	0.111	0.316	1
Kdm7a	0.123571	-1.63928	0.111	0.316	1
Tbc1d15	0.123571	-2.69672	0.111	0.316	1
Cs	0.123571	-1.4712	0.111	0.316	1
Mfap3	0.123571	-1.78557	0.111	0.316	1
Fam91a1	0.123571	-2.66472	0.111	0.316	1
Golga1	0.123926	-0.810658	0.056	0.263	1
Arl5a	0.123926	-0.552163	0.056	0.263	1
Pwwp3a	0.123926	-0.700395	0.056	0.263	1
Kpna3	0.123926	-1.07011	0.056	0.263	1
Cep162	0.123926	-1.15977	0.056	0.263	1
Ankfy1	0.123926	-1.12315	0.056	0.263	1
Znhit3	0.123926	-1.12978	0.056	0.263	1
Mrpl16	0.123926	-1.23552	0.056	0.263	1
Tmem147	0.123953	-1.16063	0.278	0.526	1
Dusp1	0.124125	0.684258	0.778	0.526	1
Suds3	0.124855	1.61965	0.389	0.158	1
Atp6v1a	0.124855	1.43811	0.389	0.158	1
Dnajc10	0.124855	-2.19143	0.167	0.368	1
Etfa	0.124855	-1.92036	0.167	0.368	1
Otulin	0.124855	-1.63718	0.167	0.368	1
Hhex	0.124855	-1.78444	0.167	0.368	1
Fth1	0.124898	0.383102	1	0.947	1
Strap	0.124987	-1.58401	0.444	0.579	1
Tmem14c	0.126213	1.04609	0.556	0.316	1
Emc10	0.127195	1.00327	0.667	0.526	1
Zbtb20	0.12747	0.971743	0.833	0.579	1
Sec62	0.12747	0.226703	0.778	0.632	1
Ppp3ca	0.128668	0.84824	0.611	0.368	1
Btg2	0.129008	0.982065	0.611	0.421	1
Ddx6	0.129008	1.35203	0.611	0.421	1
Nbdy	0.129478	-1.64294	0.278	0.474	1
Bola3	0.12996	-1.07056	0.222	0.474	1
Emp3	0.12996	-1.0483	0.222	0.474	1
Epb41l2	0.12996	-1.15442	0.222	0.474	1
Pttg1ip	0.12996	-1.78288	0.222	0.474	1
Tcf12	0.12996	-0.874735	0.222	0.474	1
Rab5c	0.12996	-0.878382	0.222	0.474	1
Ripk1	0.130154	1.06572	0.111	0.368	1
Tcf7l2	0.130154	-0.547814	0.111	0.368	1
Rassf1	0.130154	1.87388	0.333	0.158	1
Ccnt2	0.130642	2.52342	0.278	0.105	1
Chd7	0.130642	3.76861	0.278	0.105	1
Jkamp	0.130642	2.11519	0.278	0.105	1
Ptpa	0.131495	2.86597	0.222	0.053	1
Fnbp4	0.131495	2.77037	0.222	0.053	1
Vps39	0.131495	1.98434	0.222	0.053	1
Prex1	0.131495	2.33708	0.222	0.053	1
Magi3	0.131495	2.56596	0.222	0.053	1
Abcd3	0.131495	1.96975	0.222	0.053	1
Shb	0.131495	1.94029	0.222	0.053	1
Ints11	0.131495	2.75887	0.222	0.053	1
Cox18	0.131495	2.387	0.222	0.053	1
Trpv4	0.131495	2.68879	0.222	0.053	1
Polb	0.131495	2.20848	0.222	0.053	1
Atp13a1	0.131495	2.98458	0.222	0.053	1
Gadd45gip1	0.131495	1.70552	0.222	0.053	1
Pdlim2	0.131495	2.30774	0.222	0.053	1
Fam118b	0.131495	2.0683	0.222	0.053	1
Glb1	0.131495	3.68693	0.222	0.053	1
Sfi1	0.131495	2.57333	0.222	0.053	1
Trim37	0.131495	2.20043	0.222	0.053	1
Vps41	0.131495	1.93734	0.222	0.053	1
Txndc15	0.131495	2.07879	0.222	0.053	1
Ylpm1	0.131495	2.63885	0.222	0.053	1
Mrpl39	0.131495	1.98837	0.222	0.053	1
Rhot2	0.131495	3.6816	0.222	0.053	1
Map3k8	0.131495	2.13629	0.222	0.053	1
Dmxl1	0.131495	1.85081	0.222	0.053	1
Cdk2ap2	0.131495	2.64267	0.222	0.053	1
Fstl5	0.131495	5.0476	0.167	0.053	1
Rpl14	0.131739	0.51223	0.889	0.789	1
Sdf4	0.131907	-0.50136	0.5	0.789	1
Vamp5	0.131907	0.808146	0.722	0.579	1
Tap2	0.131953	1.63401	0.556	0.368	1
Dlc1	0.132529	-0.962822	0.278	0.526	1
Nmt1	0.132529	-0.325429	0.278	0.526	1
Ddx50	0.132529	2.02414	0.5	0.316	1
Tmed4	0.132625	-0.61734	0.167	0.421	1
Gm11808	0.13377	0.636524	0.778	0.579	1
Nsfl1c	0.134194	0.926201	0.333	0.105	1
Atad1	0.134194	0.559409	0.333	0.105	1
R3hdm1	0.134194	-1.47869	0.111	0.316	1
Fam3c	0.134194	-1.4768	0.111	0.316	1
Rwdd4a	0.134194	-1.13861	0.111	0.316	1
Derl2	0.134194	-1.36427	0.111	0.316	1
Csf2rb	0.134194	-2.42574	0.111	0.316	1
Mgrn1	0.134194	-2.08049	0.111	0.316	1
Synj1	0.134194	-1.30444	0.111	0.316	1
Smad2	0.134194	-1.45874	0.111	0.316	1
Cd9	0.134543	-0.768644	0.722	0.842	1
Clpx	0.134691	2.40287	0.389	0.158	1
Cobll1	0.134691	-2.06517	0.167	0.368	1
Arrb1	0.134691	-1.8989	0.167	0.368	1
Hexa	0.134691	-1.64251	0.167	0.368	1
Cdk7	0.134691	-1.46361	0.167	0.368	1
Ppp6r3	0.134691	-1.40819	0.167	0.368	1
Gna11	0.134758	-0.784766	0.278	0.579	1
Mpzl1	0.134758	1.15008	0.556	0.316	1
Ndufc2	0.137094	0.832113	0.611	0.368	1
U2af1	0.137352	1.56882	0.611	0.421	1
Sh3bgrl3	0.137714	-0.575318	0.667	0.842	1
Nfix	0.138524	-0.5203	0.222	0.526	1
Pcm1	0.138524	1.23413	0.5	0.263	1
Ctnnbip1	0.138974	-2.32175	0.222	0.421	1
Tnrc6b	0.138974	-1.4522	0.222	0.421	1
Mrtfb	0.139239	-1.40938	0.222	0.474	1
H2-Q6	0.139239	-1.06756	0.222	0.474	1
Nsmce4a	0.139239	1.72487	0.444	0.263	1
Rpl3	0.140075	0.482436	0.944	0.789	1
Rpl29	0.140451	0.246188	0.889	0.947	1
Fam171a1	0.140661	1.08277	0.556	0.368	1
Tgs1	0.140715	2.96572	0.333	0.158	1
Tial1	0.140715	2.19837	0.333	0.158	1
Ppp4r3a	0.140715	1.65673	0.333	0.158	1
Txn2	0.141557	-0.527746	0.278	0.526	1
2510039O18Rik	0.142344	2.56792	0.278	0.105	1
Nr1h2	0.142344	2.23182	0.278	0.105	1
Mfhas1	0.142344	2.07797	0.278	0.105	1
Ube2v2	0.142344	2.06458	0.278	0.105	1
Oard1	0.142344	1.71252	0.278	0.105	1
Cct5	0.142584	-1.10251	0.167	0.421	1
Cav1	0.143584	-1.08072	0.667	0.737	1
Scand1	0.143643	0.725447	0.667	0.526	1
Lrrc8c	0.143744	0.859068	0.556	0.316	1
Cav2	0.1449	-0.68171	0.5	0.632	1
Rab23	0.145087	3.89413	0.222	0.053	1
Inpp1	0.145087	2.28103	0.222	0.053	1
Mrpl44	0.145087	3.65485	0.222	0.053	1
Frmd4a	0.145087	2.16556	0.222	0.053	1
Nup214	0.145087	1.83104	0.222	0.053	1
Stxbp1	0.145087	2.06085	0.222	0.053	1
Zgpat	0.145087	1.86308	0.222	0.053	1
Triqk	0.145087	1.46138	0.222	0.053	1
Tnip2	0.145087	1.96027	0.222	0.053	1
Pom121	0.145087	1.55393	0.222	0.053	1
Sertad3	0.145087	1.58574	0.222	0.053	1
Nrbf2	0.145087	1.28467	0.222	0.053	1
Ube2d1	0.145087	1.57577	0.222	0.053	1
Prmt2	0.145087	1.84712	0.222	0.053	1
Rnf126	0.145087	1.2908	0.222	0.053	1
Nedd1	0.145087	1.94393	0.222	0.053	1
Hpf1	0.145087	1.87198	0.222	0.053	1
Thap11	0.145087	1.63273	0.222	0.053	1
Cep57	0.145087	2.71605	0.222	0.053	1
2300009A05Rik	0.145087	2.01938	0.222	0.053	1
Ddx56	0.145087	2.18322	0.222	0.053	1
Ttc19	0.145087	2.78287	0.222	0.053	1
Mnt	0.145087	2.47292	0.222	0.053	1
Zfp652	0.145087	1.72273	0.222	0.053	1
Grk6	0.145087	1.97356	0.222	0.053	1
March6	0.145087	2.23415	0.222	0.053	1
Polr3h	0.145087	2.51847	0.222	0.053	1
Phf10	0.145087	2.5453	0.222	0.053	1
Afg3l2	0.145087	1.94382	0.222	0.053	1
Fbxl15	0.145087	2.3469	0.222	0.053	1
Upf3b	0.145116	-1.54943	0.167	0.368	1
Nfyb	0.145116	-1.60107	0.167	0.368	1
Ckap4	0.145116	-1.33873	0.167	0.368	1
Ptgs1	0.14551	-1.74672	0.111	0.316	1
Ptbp2	0.14551	-1.36289	0.111	0.316	1
Pan3	0.14551	0.913366	0.111	0.316	1
B3gnt3	0.14551	-2.23192	0.111	0.316	1
Inka1	0.14551	-1.34478	0.111	0.316	1
Rnf215	0.14551	-1.69995	0.111	0.316	1
Adamts10	0.14551	-1.6115	0.111	0.316	1
Xpnpep1	0.14551	-0.98424	0.111	0.316	1
Tmbim4	0.146105	1.27159	0.611	0.421	1
Prdx1	0.146217	-0.742798	0.611	0.737	1
Rsbn1l	0.148049	0.94658	0.5	0.263	1
Srsf9	0.148049	-1.51369	0.278	0.474	1
Gfy	0.148438	4.49532	0.222	0.053	1
mt-Nd4	0.148915	-1.24849	1	0.947	1
Mgat4b	0.148995	1.25442	0.444	0.211	1
Ppp1cc	0.148995	-0.910544	0.222	0.421	1
Gna13	0.148995	-1.53778	0.222	0.421	1
Lamb2	0.148995	0.673764	0.389	0.211	1
Arpc4	0.14902	-0.418065	0.222	0.474	1
Dbnl	0.14902	-1.36406	0.222	0.474	1
Prnp	0.14902	2.31397	0.444	0.263	1
BC028528	0.14902	1.26903	0.444	0.263	1
Saysd1	0.14902	1.2937	0.444	0.263	1
Commd1	0.14902	1.41778	0.444	0.263	1
Kdm2a	0.14902	1.95327	0.444	0.263	1
Itga1	0.149803	1.31113	0.556	0.368	1
Gngt2	0.150639	-1.18281	0.389	0.579	1
Cltb	0.150639	1.46838	0.556	0.474	1
St13	0.15105	-0.243132	0.278	0.526	1
A830018L16Rik	0.151502	1.67509	0.111	0	1
Slco5a1	0.151502	3.08563	0.111	0	1
Lactb2	0.151502	1.85935	0.111	0	1
Fam135a	0.151502	1.51639	0.111	0	1
Prim2	0.151502	2.39535	0.111	0	1
Ecrg4	0.151502	4.63136	0.111	0	1
Rftn2	0.151502	1.98986	0.111	0	1
Wdr12	0.151502	3.10589	0.111	0	1
Lancl1	0.151502	1.0936	0.111	0	1
Acsl3	0.151502	1.951	0.111	0	1
Fbxo36	0.151502	2.78872	0.111	0	1
Usp40	0.151502	2.63266	0.111	0	1
Ackr3	0.151502	4.27119	0.111	0	1
Edem3	0.151502	1.07918	0.111	0	1
Nmnat2	0.151502	2.57444	0.111	0	1
Klhl20	0.151502	2.62009	0.111	0	1
Gorab	0.151502	1.99419	0.111	0	1
Ccdc181	0.151502	3.22775	0.111	0	1
Ppox	0.151502	3.00757	0.111	0	1
Nit1	0.151502	1.87821	0.111	0	1
Cnst	0.151502	2.02535	0.111	0	1
Susd4	0.151502	2.88185	0.111	0	1
Flvcr1	0.151502	1.26287	0.111	0	1
Rd3	0.151502	1.84413	0.111	0	1
Irf6	0.151502	2.37564	0.111	0	1
Meig1	0.151502	2.59622	0.111	0	1
Optn	0.151502	1.52065	0.111	0	1
Ankrd16	0.151502	1.09874	0.111	0	1
Trdmt1	0.151502	1.5283	0.111	0	1
St8sia6	0.151502	3.57007	0.111	0	1
Stam	0.151502	1.8597	0.111	0	1
Nebl	0.151502	3.106	0.111	0	1
Pip4k2a	0.151502	3.60592	0.111	0	1
Snapc4	0.151502	2.44276	0.111	0	1
Cacfd1	0.151502	2.9167	0.111	0	1
Sardh	0.151502	2.62617	0.111	0	1
Tsc1	0.151502	1.78275	0.111	0	1
Crat	0.151502	1.27229	0.111	0	1
Fam102a	0.151502	1.36292	0.111	0	1
Traf1	0.151502	3.54194	0.111	0	1
Ly75	0.151502	2.52581	0.111	0	1
Scn3a	0.151502	2.12086	0.111	0	1
Clp1	0.151502	2.36268	0.111	0	1
Pacsin3	0.151502	1.68683	0.111	0	1
1110051M20Rik	0.151502	1.83694	0.111	0	1
Cd44	0.151502	4.36768	0.111	0	1
Pdhx	0.151502	2.47192	0.111	0	1
Nat10	0.151502	2.80382	0.111	0	1
Arl14ep	0.151502	2.57207	0.111	0	1
Kif18a	0.151502	1.89999	0.111	0	1
Zfp770	0.151502	2.07861	0.111	0	1
Ccdc9b	0.151502	3.97252	0.111	0	1
Rpap1	0.151502	2.84877	0.111	0	1
Tmem87a	0.151502	1.76117	0.111	0	1
Ell3	0.151502	2.27139	0.111	0	1
Shf	0.151502	2.23366	0.111	0	1
Ap4e1	0.151502	3.59474	0.111	0	1
Atrn	0.151502	2.78362	0.111	0	1
1700037H04Rik	0.151502	1.34053	0.111	0	1
Ovol2	0.151502	4.32249	0.111	0	1
Rbm12	0.151502	1.09534	0.111	0	1
Aar2	0.151502	3.18791	0.111	0	1
Slc12a5	0.151502	1.69622	0.111	0	1
Snai1	0.151502	2.00743	0.111	0	1
Dok5	0.151502	3.66777	0.111	0	1
Prickle3	0.151502	3.97673	0.111	0	1
Dipk2b	0.151502	2.23132	0.111	0	1
Usp11	0.151502	3.16845	0.111	0	1
3830403N18Rik	0.151502	2.78413	0.111	0	1
Slc9a6	0.151502	1.26539	0.111	0	1
Haus7	0.151502	1.77041	0.111	0	1
Slc6a8	0.151502	1.09591	0.111	0	1
Mtcp1	0.151502	1.49748	0.111	0	1
Zmym3	0.151502	2.57227	0.111	0	1
Brwd3	0.151502	2.31426	0.111	0	1
Cldn34c1	0.151502	2.80099	0.111	0	1
Zcchc18	0.151502	1.70862	0.111	0	1
Nxt2	0.151502	1.532	0.111	0	1
Tsr2	0.151502	1.77282	0.111	0	1
Car5b	0.151502	1.43272	0.111	0	1
Mid1	0.151502	2.51746	0.111	0	1
Pkia	0.151502	2.64129	0.111	0	1
Zfand1	0.151502	2.21197	0.111	0	1
Mgst2	0.151502	1.78133	0.111	0	1
E130311K13Rik	0.151502	1.64775	0.111	0	1
Tiparp	0.151502	2.74173	0.111	0	1
Zbtb7b	0.151502	1.00693	0.111	0	1
Flad1	0.151502	2.3309	0.111	0	1
Cks1b	0.151502	3.11177	0.111	0	1
Chd1l	0.151502	2.21632	0.111	0	1
Gdap2	0.151502	2.85167	0.111	0	1
Tent5c	0.151502	2.49421	0.111	0	1
Ttf2	0.151502	1.52955	0.111	0	1
Dclre1b	0.151502	2.79467	0.111	0	1
Dph5	0.151502	1.10274	0.111	0	1
Synpo2	0.151502	3.07711	0.111	0	1
Ank2	0.151502	2.77212	0.111	0	1
Mcub	0.151502	1.43534	0.111	0	1
Tbck	0.151502	2.44125	0.111	0	1
Trp53inp1	0.151502	2.36305	0.111	0	1
Orc3	0.151502	1.86063	0.111	0	1
C9orf72	0.151502	1.48117	0.111	0	1
Nfx1	0.151502	1.96305	0.111	0	1
Enho	0.151502	1.77046	0.111	0	1
Galt	0.151502	1.87316	0.111	0	1
Zbtb5	0.151502	1.40049	0.111	0	1
Coro2a	0.151502	2.18518	0.111	0	1
Plppr1	0.151502	3.53314	0.111	0	1
Cdk5rap2	0.151502	2.3667	0.111	0	1
Haus6	0.151502	3.1437	0.111	0	1
Cyp2j9	0.151502	2.39061	0.111	0	1
Cyb5rl	0.151502	1.85878	0.111	0	1
9930104L06Rik	0.151502	1.87538	0.111	0	1
Oscp1	0.151502	2.43274	0.111	0	1
Azin2	0.151502	1.72582	0.111	0	1
Mecr	0.151502	1.93404	0.111	0	1
Rpa2	0.151502	2.48027	0.111	0	1
Hmgcl	0.151502	2.4138	0.111	0	1
Pramef8	0.151502	2.14732	0.111	0	1
Casz1	0.151502	2.94894	0.111	0	1
Spsb1	0.151502	2.56454	0.111	0	1
Megf6	0.151502	4.66523	0.111	0	1
Pank4	0.151502	1.753	0.111	0	1
Dvl1	0.151502	2.50249	0.111	0	1
B3galt6	0.151502	2.21842	0.111	0	1
Dbf4	0.151502	1.9553	0.111	0	1
Kcnh2	0.151502	2.20203	0.111	0	1
Agap3	0.151502	1.09921	0.111	0	1
Actr3b	0.151502	2.56084	0.111	0	1
Slc35f6	0.151502	2.39419	0.111	0	1
Fgfr3	0.151502	2.7719	0.111	0	1
Cep135	0.151502	2.47819	0.111	0	1
Adgrl3	0.151502	4.44805	0.111	0	1
Klhl8	0.151502	2.07771	0.111	0	1
Gm17655	0.151502	2.69106	0.111	0	1
Ift81	0.151502	4.55565	0.111	0	1
Dnah10	0.151502	1.73171	0.111	0	1
Psph	0.151502	2.42887	0.111	0	1
Tbl2	0.151502	3.56187	0.111	0	1
Tmem184a	0.151502	1.70699	0.111	0	1
Nudt1	0.151502	1.86774	0.111	0	1
Ptcd1	0.151502	2.31475	0.111	0	1
Ing3	0.151502	2.17934	0.111	0	1
Cyren	0.151502	2.55755	0.111	0	1
Zfp777	0.151502	2.39236	0.111	0	1
Chchd6	0.151502	2.17332	0.111	0	1
Zxdc	0.151502	2.6899	0.111	0	1
Slc25a26	0.151502	1.76189	0.111	0	1
Crbn	0.151502	1.93564	0.111	0	1
Thumpd3	0.151502	1.74795	0.111	0	1
Atp2b2	0.151502	1.70343	0.111	0	1
Tamm41	0.151502	1.52055	0.111	0	1
Syn2	0.151502	1.84399	0.111	0	1
Mkrn2	0.151502	1.86821	0.111	0	1
Cecr2	0.151502	1.47421	0.111	0	1
Gpr162	0.151502	2.51583	0.111	0	1
Kcna6	0.151502	0.85145	0.111	0	1
Tead4	0.151502	2.15082	0.111	0	1
Recql	0.151502	1.87583	0.111	0	1
Lrmp	0.151502	1.32687	0.111	0	1
Klhl42	0.151502	4.48664	0.111	0	1
Vmn1r65	0.151502	2.63846	0.111	0	1
Zfp667	0.151502	2.0017	0.111	0	1
Ccdc9	0.151502	2.50428	0.111	0	1
Zc3h4	0.151502	1.87458	0.111	0	1
Opa3	0.151502	1.85401	0.111	0	1
Mark4	0.151502	2.38729	0.111	0	1
Bloc1s3	0.151502	1.75785	0.111	0	1
Smg9	0.151502	2.07222	0.111	0	1
Zfp428	0.151502	3.15721	0.111	0	1
Irgq	0.151502	1.33692	0.111	0	1
Lipe	0.151502	2.87822	0.111	0	1
Ceacam1	0.151502	2.6728	0.111	0	1
Akt2	0.151502	2.41598	0.111	0	1
Zfp84	0.151502	1.52501	0.111	0	1
Zfp74	0.151502	3.56258	0.111	0	1
Hamp	0.151502	6.65672	0.111	0	1
Nup62	0.151502	2.68101	0.111	0	1
Fuz	0.151502	1.35485	0.111	0	1
Cpt1c	0.151502	1.73031	0.111	0	1
Saal1	0.151502	2.22871	0.111	0	1
Lins1	0.151502	1.69489	0.111	0	1
Sema4b	0.151502	2.54539	0.111	0	1
Ankrd42	0.151502	1.74584	0.111	0	1
Pak1	0.151502	1.0412	0.111	0	1
Ucp2	0.151502	1.16851	0.111	0	1
Trpc2	0.151502	2.56511	0.111	0	1
Fam160a2	0.151502	2.09536	0.111	0	1
Trim66	0.151502	2.95281	0.111	0	1
Ctr9	0.151502	1.94363	0.111	0	1
Btbd10	0.151502	1.44805	0.111	0	1
Ccp110	0.151502	1.46693	0.111	0	1
Sbk1	0.151502	1.5916	0.111	0	1
Slx1b	0.151502	1.63702	0.111	0	1
Orai3	0.151502	1.1007	0.111	0	1
Fgfr2	0.151502	1.90235	0.111	0	1
Deaf1	0.151502	2.42332	0.111	0	1
Cend1	0.151502	3.12776	0.111	0	1
Tnfrsf23	0.151502	1.78333	0.111	0	1
LTO1	0.151502	1.76671	0.111	0	1
Mical1	0.151502	2.44099	0.111	0	1
Mcm9	0.151502	2.95064	0.111	0	1
Asf1a	0.151502	2.20306	0.111	0	1
Pkib	0.151502	2.61416	0.111	0	1
Ascc1	0.151502	1.75159	0.111	0	1
Unc5b	0.151502	2.82003	0.111	0	1
Ank3	0.151502	2.36537	0.111	0	1
Chchd10	0.151502	3.11074	0.111	0	1
Sppl2b	0.151502	3.15699	0.111	0	1
Gadd45b	0.151502	3.84953	0.111	0	1
Slc39a3	0.151502	2.49581	0.111	0	1
Atcay	0.151502	2.3707	0.111	0	1
Zfp938	0.151502	1.0851	0.111	0	1
Hcfc2	0.151502	3.09642	0.111	0	1
Polr3b	0.151502	1.8832	0.111	0	1
Cep290	0.151502	1.33209	0.111	0	1
Pawr	0.151502	2.49887	0.111	0	1
D930020B18Rik	0.151502	4.43887	0.111	0	1
Zbtb39	0.151502	2.64199	0.111	0	1
Pym1	0.151502	2.03924	0.111	0	1
Arhgef18	0.151502	4.45686	0.111	0	1
Thap1	0.151502	1.63185	0.111	0	1
Fut10	0.151502	2.6505	0.111	0	1
Tma16	0.151502	2.18825	0.111	0	1
Ints10	0.151502	1.25713	0.111	0	1
Lzts1	0.151502	2.43497	0.111	0	1
Mef2b	0.151502	2.92983	0.111	0	1
Mast3	0.151502	3.21794	0.111	0	1
Map1s	0.151502	1.86106	0.111	0	1
Myo9b	0.151502	2.43464	0.111	0	1
Slc27a1	0.151502	2.29778	0.111	0	1
Tom1	0.151502	2.63881	0.111	0	1
Usp38	0.151502	1.52154	0.111	0	1
Ccdc130	0.151502	1.51858	0.111	0	1
Phkb	0.151502	2.22366	0.111	0	1
Rbl2	0.151502	2.1489	0.111	0	1
Rrad	0.151502	2.29341	0.111	0	1
Nol3	0.151502	2.03898	0.111	0	1
Slc7a6os	0.151502	1.98344	0.111	0	1
Adat1	0.151502	1.27441	0.111	0	1
Klhdc4	0.151502	2.12353	0.111	0	1
Tubb3	0.151502	1.49575	0.111	0	1
Tarbp1	0.151502	1.52843	0.111	0	1
Fam107a	0.151502	2.53389	0.111	0	1
Cadps	0.151502	1.84383	0.111	0	1
Ndst2	0.151502	3.86996	0.111	0	1
Dcp1a	0.151502	2.44361	0.111	0	1
Rft1	0.151502	1.52299	0.111	0	1
Oxnad1	0.151502	1.0645	0.111	0	1
Cdhr1	0.151502	2.72733	0.111	0	1
Tssk4	0.151502	1.69172	0.111	0	1
Zmym2	0.151502	2.80963	0.111	0	1
Fgf9	0.151502	2.45701	0.111	0	1
Atp8a2	0.151502	2.37533	0.111	0	1
Slc39a14	0.151502	1.10428	0.111	0	1
Tdrd3	0.151502	2.30152	0.111	0	1
Lmo7	0.151502	4.5241	0.111	0	1
Cep126	0.151502	1.15287	0.111	0	1
1700012B09Rik	0.151502	3.50387	0.111	0	1
Qtrt1	0.151502	1.52417	0.111	0	1
Timm29	0.151502	2.79693	0.111	0	1
St14	0.151502	2.26706	0.111	0	1
Tirap	0.151502	2.60087	0.111	0	1
Zw10	0.151502	2.95128	0.111	0	1
Atm	0.151502	3.36499	0.111	0	1
Dnaja4	0.151502	2.76292	0.111	0	1
Man2c1	0.151502	2.55283	0.111	0	1
Cyp1a1	0.151502	2.23614	0.111	0	1
Cln6	0.151502	1.51088	0.111	0	1
Rab27a	0.151502	1.97662	0.111	0	1
Gsta4	0.151502	1.95633	0.111	0	1
Ooep	0.151502	3.2226	0.111	0	1
Plod2	0.151502	1.74741	0.111	0	1
Clstn2	0.151502	2.24967	0.111	0	1
Dnajc13	0.151502	2.4513	0.111	0	1
Mrpl3	0.151502	2.63781	0.111	0	1
Aste1	0.151502	2.30986	0.111	0	1
Ccdc71	0.151502	1.43613	0.111	0	1
P4htm	0.151502	3.45818	0.111	0	1
Plxnb1	0.151502	1.82901	0.111	0	1
Ccdc117	0.151502	2.63183	0.111	0	1
Ccdc85a	0.151502	1.71182	0.111	0	1
Pank3	0.151502	1.41472	0.111	0	1
Tenm2	0.151502	2.76842	0.111	0	1
Zfp672	0.151502	2.43317	0.111	0	1
H2bu2	0.151502	2.46636	0.111	0	1
Tmem11	0.151502	2.56676	0.111	0	1
Mapk7	0.151502	1.97448	0.111	0	1
Specc1	0.151502	2.67442	0.111	0	1
Neurl4	0.151502	4.47804	0.111	0	1
Dlg4	0.151502	4.51778	0.111	0	1
Med11	0.151502	1.75992	0.111	0	1
Unc119	0.151502	1.4783	0.111	0	1
Slfn3	0.151502	2.08745	0.111	0	1
Acaca	0.151502	1.76295	0.111	0	1
Tspoap1	0.151502	1.31957	0.111	0	1
Gm45716	0.151502	2.32362	0.111	0	1
Stxbp4	0.151502	1.42126	0.111	0	1
Dlx3	0.151502	0.943454	0.111	0	1
Srcin1	0.151502	1.56781	0.111	0	1
Ccdc43	0.151502	3.09309	0.111	0	1
Fmnl1	0.151502	2.13927	0.111	0	1
Tsen54	0.151502	1.1079	0.111	0	1
Unk	0.151502	2.50694	0.111	0	1
Fbf1	0.151502	2.87358	0.111	0	1
Usp36	0.151502	1.10047	0.111	0	1
Bahcc1	0.151502	1.89253	0.111	0	1
Nploc4	0.151502	2.56466	0.111	0	1
Hist1h2ap	0.151502	2.36635	0.111	0	1
Tbc1d7	0.151502	1.34184	0.111	0	1
Fam8a1	0.151502	1.97915	0.111	0	1
Ptpdc1	0.151502	2.51584	0.111	0	1
Wnk2	0.151502	1.67754	0.111	0	1
B4galt7	0.151502	2.59711	0.111	0	1
Spock1	0.151502	3.89746	0.111	0	1
Gm49359	0.151502	2.07572	0.111	0	1
Ptdss1	0.151502	2.11067	0.111	0	1
Ap3b1	0.151502	1.87093	0.111	0	1
Gm10260	0.151502	1.98228	0.111	0	1
Ccdc125	0.151502	2.65182	0.111	0	1
Adi1	0.151502	2.01825	0.111	0	1
Eipr1	0.151502	1.482	0.111	0	1
Atxn7l1	0.151502	2.7607	0.111	0	1
Foxg1	0.151502	2.82278	0.111	0	1
G2e3	0.151502	1.64161	0.111	0	1
Prorp	0.151502	2.57533	0.111	0	1
Mthfd1	0.151502	1.94077	0.111	0	1
Gphn	0.151502	1.58557	0.111	0	1
Acot1	0.151502	2.0246	0.111	0	1
Ift43	0.151502	2.00362	0.111	0	1
Angel1	0.151502	1.06543	0.111	0	1
Ptpn21	0.151502	2.22899	0.111	0	1
Itpk1	0.151502	2.50273	0.111	0	1
Bcl11b	0.151502	2.31149	0.111	0	1
Pacs2	0.151502	1.08014	0.111	0	1
Ttc33	0.151502	2.4526	0.111	0	1
Spef2	0.151502	1.41959	0.111	0	1
Cpq	0.151502	2.6998	0.111	0	1
Samd12	0.151502	2.17842	0.111	0	1
Lratd2	0.151502	2.35197	0.111	0	1
Them6	0.151502	4.67103	0.111	0	1
Zc3h3	0.151502	2.90705	0.111	0	1
Zfp623	0.151502	2.22456	0.111	0	1
Nrbp2	0.151502	1.77198	0.111	0	1
Hgh1	0.151502	2.57555	0.111	0	1
Apol9b	0.151502	3.04699	0.111	0	1
Nptxr	0.151502	2.11984	0.111	0	1
Mrtfa	0.151502	2.36531	0.111	0	1
Tcf20	0.151502	2.73415	0.111	0	1
Trmu	0.151502	2.47506	0.111	0	1
Cerk	0.151502	1.59393	0.111	0	1
Tbc1d22a	0.151502	2.6667	0.111	0	1
Kif21a	0.151502	3.05415	0.111	0	1
Cntn1	0.151502	3.39047	0.111	0	1
Asb8	0.151502	2.72053	0.111	0	1
Lalba	0.151502	1.44249	0.111	0	1
Asic1	0.151502	2.42208	0.111	0	1
Slc4a8	0.151502	1.97326	0.111	0	1
Krt90	0.151502	3.06484	0.111	0	1
Smim22	0.151502	2.36226	0.111	0	1
Snap29	0.151502	1.25746	0.111	0	1
Smpd4	0.151502	2.35541	0.111	0	1
Prodh	0.151502	2.22762	0.111	0	1
Camk2n2	0.151502	1.7005	0.111	0	1
Xxylt1	0.151502	2.61328	0.111	0	1
Paxbp1	0.151502	3.17427	0.111	0	1
Dynlt1a	0.151502	3.12109	0.111	0	1
Acat2	0.151502	2.53083	0.111	0	1
Wdr27	0.151502	2.61496	0.111	0	1
Zfp51	0.151502	1.52477	0.111	0	1
Zfp942	0.151502	2.38662	0.111	0	1
Ift140	0.151502	2.35982	0.111	0	1
Axin1	0.151502	2.76649	0.111	0	1
Def6	0.151502	1.76978	0.111	0	1
Fance	0.151502	3.1816	0.111	0	1
Umodl1	0.151502	3.06207	0.111	0	1
Cfb	0.151502	2.80848	0.111	0	1
Ttbk1	0.151502	1.29083	0.111	0	1
Cul9	0.151502	3.2341	0.111	0	1
Satb1	0.151502	1.86457	0.111	0	1
Stap2	0.151502	2.36329	0.111	0	1
Kdm4b	0.151502	2.55166	0.111	0	1
Fer	0.151502	1.27648	0.111	0	1
Epb41l3	0.151502	2.63189	0.111	0	1
Camkmt	0.151502	2.38921	0.111	0	1
Gm3550	0.151502	2.72543	0.111	0	1
1700066B19Rik	0.151502	2.63984	0.111	0	1
Spink10	0.151502	2.81025	0.111	0	1
Me2	0.151502	2.06047	0.111	0	1
Kcng2	0.151502	2.38039	0.111	0	1
1810055G02Rik	0.151502	1.89701	0.111	0	1
Ssh3	0.151502	2.5341	0.111	0	1
Rps6ka4	0.151502	2.68279	0.111	0	1
Naa40	0.151502	1.04497	0.111	0	1
Wdr74	0.151502	2.55278	0.111	0	1
Gng3	0.151502	2.7641	0.111	0	1
Sdhaf2	0.151502	1.0841	0.111	0	1
Vps37c	0.151502	2.99007	0.111	0	1
Vldlr	0.151502	1.70352	0.111	0	1
Ranbp6	0.151502	1.76428	0.111	0	1
Dusp5	0.151502	2.79131	0.111	0	1
Sfxn4	0.151502	2.22883	0.111	0	1
Lhx2	0.151502	0.685432	0.056	0	1
Vmn1r35	0.151502	4.28818	0.056	0	1
Epsti1	0.151502	0.799275	0.056	0	1
Trim12a	0.151922	1.78246	0.333	0.158	1
Derl1	0.151922	2.77797	0.333	0.158	1
Zfp395	0.152275	-2.54848	0	0.211	1
Ccdc80	0.152275	-2.72293	0	0.211	1
Cab39	0.152275	-1.80966	0.056	0.211	1
Rabl6	0.152275	-2.29924	0.056	0.211	1
Orc4	0.152275	-2.585	0.056	0.211	1
Rbm10	0.152275	-2.79734	0.056	0.211	1
Rap2b	0.152275	-2.07752	0.056	0.211	1
Arfip1	0.152275	-1.89707	0.056	0.211	1
Map3k7	0.152275	-2.23488	0.056	0.211	1
Dcaf10	0.152275	-2.20476	0.056	0.211	1
Hsdl2	0.152275	-2.23067	0.056	0.211	1
Mtap	0.152275	-1.98286	0.056	0.211	1
Steap4	0.152275	-1.87021	0.056	0.211	1
Nfkbib	0.152275	-2.41612	0.056	0.211	1
Ano8	0.152275	-2.45663	0.056	0.211	1
Ddhd1	0.152275	-2.80244	0.056	0.211	1
Ppp2r3d	0.152275	-2.1869	0.056	0.211	1
Med31	0.152275	-1.64181	0.056	0.211	1
Usp32	0.152275	-2.29471	0.056	0.211	1
Cdk13	0.152275	-2.04737	0.056	0.211	1
Srek1ip1	0.152275	-2.52044	0.056	0.211	1
Rdh11	0.152275	-3.17644	0.056	0.211	1
Mapk12	0.152275	-2.51203	0.056	0.211	1
Hira	0.152275	-2.95249	0.056	0.211	1
Lnpep	0.152275	-2.40251	0.056	0.211	1
Ehmt2	0.152275	-2.39686	0.056	0.211	1
Foxn2	0.152275	-2.9582	0.056	0.211	1
Iws1	0.152275	-2.90264	0.056	0.211	1
Tacc1	0.152456	0.538557	0.722	0.474	1
Rps19	0.152996	0.440909	0.944	0.842	1
Ywhag	0.153108	-1.14336	0.167	0.421	1
Ggta1	0.153108	2.67783	0.389	0.211	1
Snrnp48	0.153108	2.20989	0.389	0.211	1
Slfn5	0.153842	0.82029	0.611	0.526	1
Aebp1	0.154801	-1.29036	0.444	0.632	1
Smc1a	0.154801	1.01053	0.611	0.474	1
Lin7c	0.154835	2.04311	0.278	0.105	1
Taz	0.154835	1.41879	0.278	0.105	1
Taf12	0.154835	1.82659	0.278	0.105	1
Uso1	0.154835	1.82354	0.278	0.105	1
1500011B03Rik	0.154835	2.22933	0.278	0.105	1
Dguok	0.154835	1.95439	0.278	0.105	1
Txnrd1	0.154835	1.73235	0.278	0.105	1
Cfap36	0.154835	2.10576	0.278	0.105	1
Nek9	0.154835	1.84924	0.278	0.105	1
Socs1	0.154835	1.76081	0.278	0.105	1
Lrch3	0.154835	2.56753	0.278	0.105	1
Gnl1	0.154835	2.07402	0.278	0.105	1
Ctnnb1	0.154994	-0.93138	0.611	0.737	1
Lamtor5	0.155215	-1.07742	0.333	0.632	1
Tmem256	0.155279	-0.840521	0.389	0.632	1
Ap1ar	0.156147	-2.06894	0.167	0.368	1
Maea	0.156147	-2.31667	0.167	0.368	1
Limd1	0.156147	-1.32446	0.167	0.368	1
Dennd5b	0.157543	-1.08855	0.111	0.316	1
Ggact	0.157543	-1.36271	0.111	0.316	1
mt-Nd3	0.157561	-1.65354	0.889	0.947	1
Wdr26	0.158067	-0.917811	0.278	0.474	1
Tgm2	0.158067	-1.1555	0.278	0.474	1
Ski	0.158067	-1.47283	0.278	0.474	1
Crk	0.158067	-1.06987	0.278	0.474	1
Mrpl14	0.158067	-1.45625	0.278	0.474	1
Erh	0.159318	-1.31604	0.222	0.474	1
H2-M3	0.159318	-0.936896	0.222	0.474	1
Zc3h7a	0.159318	1.65363	0.444	0.263	1
Arl2	0.159559	0.713397	0.444	0.211	1
Larp4	0.159559	-1.05416	0.222	0.421	1
Fh1	0.159731	1.03734	0.222	0.053	1
Ttf1	0.159731	1.14666	0.222	0.053	1
Slc9a8	0.159731	1.52857	0.222	0.053	1
Fbrsl1	0.159731	1.25752	0.222	0.053	1
Suclg2	0.159731	1.36769	0.222	0.053	1
Pex5	0.159731	1.34884	0.222	0.053	1
Rhog	0.159731	1.75511	0.222	0.053	1
Hddc2	0.159731	0.972939	0.222	0.053	1
Mex3d	0.159731	1.64016	0.222	0.053	1
Hmgxb4	0.159731	1.33067	0.222	0.053	1
Kctd2	0.159731	1.9632	0.222	0.053	1
Eef1e1	0.159731	1.2206	0.222	0.053	1
Mylip	0.159731	1.31358	0.222	0.053	1
Mctp1	0.159731	1.52068	0.222	0.053	1
Gpsm3	0.159731	1.35453	0.222	0.053	1
Pcdh1	0.159731	1.15665	0.222	0.053	1
Unc93b1	0.159731	1.60217	0.222	0.053	1
Slco1a4	0.15977	0.750157	0.722	0.526	1
Chmp5	0.161021	0.925836	0.5	0.316	1
Nop10	0.161674	0.67929	0.667	0.526	1
Kdelr1	0.163084	-1.46395	0.333	0.526	1
Cox6a1	0.163196	1.07838	0.611	0.526	1
Fam76a	0.163797	1.68037	0.333	0.158	1
Sae1	0.163797	1.4663	0.333	0.158	1
Tmem9b	0.163797	2.00797	0.333	0.158	1
Polr2c	0.164212	0.672518	0.167	0.421	1
Bcl2l1	0.164212	1.58003	0.389	0.211	1
Piezo1	0.164212	1.50231	0.389	0.211	1
Atp5g3	0.164285	-0.920156	0.444	0.632	1
Adgrl4	0.164669	-1.36005	0.667	0.895	1
Actb	0.165906	0.635344	0.889	0.789	1
Igfbp7	0.166787	-0.875628	0.944	1	1
Arhgdia	0.166859	-0.559969	0.5	0.789	1
Cop1	0.167459	-2.10049	0.056	0.211	1
Zbtb43	0.167459	-1.51641	0.056	0.211	1
Epc2	0.167459	-1.75209	0.056	0.211	1
Mfap1b	0.167459	-1.48874	0.056	0.211	1
Naa10	0.167459	-1.96813	0.056	0.211	1
Eps15	0.167459	-1.96049	0.056	0.211	1
Pwp1	0.167459	-1.4239	0.056	0.211	1
Tdrp	0.167459	-2.66475	0.056	0.211	1
Plat	0.167459	-2.83256	0.056	0.211	1
Spata13	0.167459	-2.08438	0.056	0.211	1
Cops3	0.167459	-2.42672	0.056	0.211	1
Helz	0.167459	-2.01037	0.056	0.211	1
Mterf3	0.167459	-1.76533	0.056	0.211	1
Mzt2	0.167459	-1.71138	0.056	0.211	1
Tmem173	0.167459	-2.21738	0.056	0.211	1
Reg3g	0.167459	-2.50978	0.056	0.158	1
Mob1a	0.167803	-1.59316	0.167	0.368	1
Naxd	0.167803	-0.363364	0.167	0.368	1
Mrpl13	0.167803	-2.28849	0.167	0.368	1
Cox20	0.168141	1.4627	0.278	0.105	1
Zfp106	0.168141	2.20864	0.278	0.105	1
Ap2a1	0.168141	1.76572	0.278	0.105	1
Cgnl1	0.168141	2.05381	0.278	0.105	1
Peli1	0.168141	1.60992	0.278	0.105	1
Tvp23b	0.168141	1.48182	0.278	0.105	1
Susd6	0.168141	1.32487	0.278	0.105	1
Ckb	0.168141	2.76718	0.278	0.105	1
Pmm1	0.168141	1.75843	0.278	0.105	1
Parl	0.168141	1.45739	0.278	0.105	1
Yy1	0.16859	-0.974474	0.278	0.474	1
Synm	0.169987	-2.027	0.222	0.368	1
2900026A02Rik	0.170144	-0.333026	0.222	0.474	1
Gclm	0.170144	1.22124	0.444	0.263	1
Elf1	0.170144	1.49844	0.444	0.263	1
Smagp	0.170144	1.55234	0.389	0.263	1
Syngr2	0.170315	-1.09176	0.111	0.316	1
Ninj1	0.170315	-1.56221	0.111	0.316	1
Naga	0.170315	-1.34949	0.111	0.316	1
Bnip3l	0.170625	0.449233	0.778	0.632	1
Impad1	0.17068	-1.11362	0.222	0.421	1
Txnip	0.173218	0.832268	0.833	0.684	1
Tra2b	0.173462	0.983748	0.556	0.316	1
Pbx1	0.173462	-1.01455	0.333	0.526	1
Ttc28	0.173462	-1.48731	0.333	0.526	1
Wdr83os	0.173462	-0.906163	0.333	0.526	1
Rsrp1	0.1742	1.01373	0.667	0.421	1
Cnnm3	0.174871	-1.83566	0	0.105	1
Mars2	0.174871	-2.0337	0	0.105	1
1700066M21Rik	0.174871	-1.77905	0	0.105	1
Carf	0.174871	-2.42588	0	0.105	1
Dgkd	0.174871	-2.04894	0	0.105	1
Col6a3	0.174871	-2.91037	0	0.105	1
Fcgr2b	0.174871	-3.14315	0	0.105	1
Nr1i3	0.174871	-1.78952	0	0.105	1
Adamts4	0.174871	-2.8537	0	0.105	1
Vangl2	0.174871	-1.39229	0	0.105	1
Atp1a2	0.174871	-3.1245	0	0.105	1
Aim2	0.174871	-1.50555	0	0.105	1
Coq8a	0.174871	-1.48454	0	0.105	1
Hlx	0.174871	-1.60766	0	0.105	1
Traf5	0.174871	-1.43284	0	0.105	1
Taf3	0.174871	-1.81402	0	0.105	1
Fpgs	0.174871	-1.37189	0	0.105	1
Ccdc73	0.174871	-3.25422	0	0.105	1
Elp4	0.174871	-1.97502	0	0.105	1
Zfyve19	0.174871	-3.02191	0	0.105	1
Ndufaf1	0.174871	-1.45729	0	0.105	1
Tmem62	0.174871	-1.96454	0	0.105	1
Tubgcp4	0.174871	-2.00262	0	0.105	1
Rnf24	0.174871	-1.79146	0	0.105	1
Rassf2	0.174871	-2.24785	0	0.105	1
Zswim3	0.174871	-1.27096	0	0.105	1
Trp53rkb	0.174871	-2.1683	0	0.105	1
Cse1l	0.174871	-1.74445	0	0.105	1
Hdac6	0.174871	-1.95893	0	0.105	1
Rap2c	0.174871	-2.02422	0	0.105	1
Prrg3	0.174871	-1.84254	0	0.105	1
Bhlhb9	0.174871	-1.25401	0	0.105	1
Tbc1d8b	0.174871	-1.23029	0	0.105	1
Siah1b	0.174871	-1.76754	0	0.105	1
Pld1	0.174871	-1.7964	0	0.105	1
Pcdh18	0.174871	-2.01314	0	0.105	1
Slc33a1	0.174871	-1.26613	0	0.105	1
Tlr2	0.174871	-1.59417	0	0.105	1
Sh3d19	0.174871	-2.12713	0	0.105	1
Ctsk	0.174871	-3.74272	0	0.105	1
Sgms2	0.174871	-1.23227	0	0.105	1
Npnt	0.174871	-2.20138	0	0.105	1
Fpgt	0.174871	-1.79151	0	0.105	1
2610301B20Rik	0.174871	-2.85202	0	0.105	1
Ints8	0.174871	-2.12724	0	0.105	1
Mdn1	0.174871	-1.3988	0	0.105	1
Rars2	0.174871	-1.8933	0	0.105	1
Pars2	0.174871	-2.80759	0	0.105	1
Cdkn2c	0.174871	-3.1217	0	0.105	1
Hectd3	0.174871	-1.39964	0	0.105	1
Szt2	0.174871	-1.78362	0	0.105	1
Cdc20	0.174871	-2.14046	0	0.105	1
Snip1	0.174871	-1.57844	0	0.105	1
Tmem35b	0.174871	-1.47476	0	0.105	1
Zfp362	0.174871	-1.97115	0	0.105	1
S100pbp	0.174871	-1.86883	0	0.105	1
Ptpru	0.174871	-2.25908	0	0.105	1
Eya3	0.174871	-1.26407	0	0.105	1
Selenon	0.174871	-2.01539	0	0.105	1
C1qb	0.174871	-2.79313	0	0.105	1
C1qa	0.174871	-3.10568	0	0.105	1
Lzic	0.174871	-1.75732	0	0.105	1
Crygn	0.174871	-2.43693	0	0.105	1
Xrcc2	0.174871	-1.4245	0	0.105	1
Cenpa	0.174871	-1.52576	0	0.105	1
5730480H06Rik	0.174871	-1.80978	0	0.105	1
N4bp2	0.174871	-1.98586	0	0.105	1
Ppat	0.174871	-1.58334	0	0.105	1
Bmp2k	0.174871	-1.98609	0	0.105	1
Rpap2	0.174871	-2.11493	0	0.105	1
Dgkq	0.174871	-1.73882	0	0.105	1
Tfip11	0.174871	-1.50123	0	0.105	1
Usp30	0.174871	-1.47722	0	0.105	1
Tbx3	0.174871	-2.92167	0	0.105	1
Rbm19	0.174871	-1.90874	0	0.105	1
Mphosph9	0.174871	-1.40564	0	0.105	1
Snrnp35	0.174871	-2.04002	0	0.105	1
Gtf2h3	0.174871	-1.89943	0	0.105	1
Tpst1	0.174871	-2.03946	0	0.105	1
Map11	0.174871	-2.10849	0	0.105	1
Brat1	0.174871	-1.2216	0	0.105	1
Zfp12	0.174871	-1.54993	0	0.105	1
Tfpi2	0.174871	-1.82835	0	0.105	1
Ahcyl2	0.174871	-1.50266	0	0.105	1
Casp2	0.174871	-2.22597	0	0.105	1
Tcaf2	0.174871	-1.64584	0	0.105	1
Ezh2	0.174871	-1.54901	0	0.105	1
Zfp398	0.174871	-1.4884	0	0.105	1
Repin1	0.174871	-1.41385	0	0.105	1
Vmn1r13	0.174871	-2.91929	0	0.105	1
Lancl2	0.174871	-2.24117	0	0.105	1
Smarcad1	0.174871	-2.01308	0	0.105	1
Prdm5	0.174871	-2.63131	0	0.105	1
Eif2ak3	0.174871	-1.66581	0	0.105	1
Polr1a	0.174871	-2.34804	0	0.105	1
Isy1	0.174871	-2.89813	0	0.105	1
Il17rc	0.174871	-2.85061	0	0.105	1
Csgalnact2	0.174871	-1.99702	0	0.105	1
Foxm1	0.174871	-1.6111	0	0.105	1
Rdh13	0.174871	-1.91162	0	0.105	1
Peg3	0.174871	-2.16223	0	0.105	1
Ccdc61	0.174871	-1.59887	0	0.105	1
Dmac2	0.174871	-2.43396	0	0.105	1
Zfp780b	0.174871	-2.00071	0	0.105	1
Zfp850	0.174871	-1.43113	0	0.105	1
Plekhg2	0.174871	-2.16082	0	0.105	1
Kcnk6	0.174871	-1.89718	0	0.105	1
Fxyd1	0.174871	-2.15181	0	0.105	1
AI987944	0.174871	-2.22863	0	0.105	1
Flt3l	0.174871	-2.15736	0	0.105	1
Gys1	0.174871	-1.49048	0	0.105	1
Prmt3	0.174871	-1.82381	0	0.105	1
Abhd17c	0.174871	-1.47776	0	0.105	1
Trim5	0.174871	-1.42364	0	0.105	1
Dcun1d3	0.174871	-1.21866	0	0.105	1
Gga2	0.174871	-2.56344	0	0.105	1
Hirip3	0.174871	-1.95832	0	0.105	1
Zfp629	0.174871	-3.43041	0	0.105	1
Kat8	0.174871	-1.76394	0	0.105	1
Epm2a	0.174871	-1.57415	0	0.105	1
L3mbtl3	0.174871	-2.08263	0	0.105	1
Lama2	0.174871	-4.14604	0	0.105	1
Amd2	0.174871	-1.58201	0	0.105	1
Zbtb24	0.174871	-1.96094	0	0.105	1
Gopc	0.174871	-1.52618	0	0.105	1
Col6a2	0.174871	-1.95082	0	0.105	1
Gatd3a	0.174871	-1.61905	0	0.105	1
2610008E11Rik	0.174871	-2.00162	0	0.105	1
Mier2	0.174871	-2.05551	0	0.105	1
Sirt6	0.174871	-1.75964	0	0.105	1
Appl2	0.174871	-1.88903	0	0.105	1
Uhrf1bp1l	0.174871	-1.40533	0	0.105	1
Lum	0.174871	-4.07018	0	0.105	1
Krr1	0.174871	-2.02249	0	0.105	1
Pnpla6	0.174871	-2.43197	0	0.105	1
Champ1	0.174871	-1.98672	0	0.105	1
Bag4	0.174871	-1.60341	0	0.105	1
Brf2	0.174871	-2.78988	0	0.105	1
Tll1	0.174871	-1.41527	0	0.105	1
Pgpep1	0.174871	-1.20886	0	0.105	1
Zfp617	0.174871	-2.23896	0	0.105	1
Cacna1a	0.174871	-2.86449	0	0.105	1
Hook2	0.174871	-3.52287	0	0.105	1
Tnpo2	0.174871	-1.94856	0	0.105	1
Nod2	0.174871	-1.6015	0	0.105	1
Ogfod1	0.174871	-1.51122	0	0.105	1
Prmt7	0.174871	-1.57622	0	0.105	1
Cdh3	0.174871	-1.27302	0	0.105	1
Mon1b	0.174871	-3.76772	0	0.105	1
Banp	0.174871	-3.29823	0	0.105	1
Ntpcr	0.174871	-1.71526	0	0.105	1
Pard3	0.174871	-1.78268	0	0.105	1
Plau	0.174871	-1.64793	0	0.105	1
Lrmda	0.174871	-1.84118	0	0.105	1
Gm9780	0.174871	-1.53939	0	0.105	1
Actr8	0.174871	-1.68156	0	0.105	1
Vstm4	0.174871	-2.92137	0	0.105	1
Gmpr2	0.174871	-1.77521	0	0.105	1
Fdft1	0.174871	-1.97189	0	0.105	1
Kif13b	0.174871	-1.79628	0	0.105	1
Ints9	0.174871	-1.86086	0	0.105	1
Alkbh8	0.174871	-2.19979	0	0.105	1
Fut4	0.174871	-3.34339	0	0.105	1
Zfp426	0.174871	-1.95659	0	0.105	1
Nrgn	0.174871	-1.75514	0	0.105	1
Ubash3b	0.174871	-1.23191	0	0.105	1
Mpzl3	0.174871	-1.56205	0	0.105	1
Tagln	0.174871	-2.92134	0	0.105	1
Dixdc1	0.174871	-2.10909	0	0.105	1
Alg9	0.174871	-1.52876	0	0.105	1
Islr	0.174871	-2.92114	0	0.105	1
Adpgk	0.174871	-1.69502	0	0.105	1
Glce	0.174871	-1.68928	0	0.105	1
Ints14	0.174871	-1.58162	0	0.105	1
Leo1	0.174871	-1.66606	0	0.105	1
Col12a1	0.174871	-2.11111	0	0.105	1
Sh3bgrl2	0.174871	-1.52358	0	0.105	1
Acad11	0.174871	-2.08333	0	0.105	1
Parp3	0.174871	-2.02106	0	0.105	1
Dusp18	0.174871	-1.39892	0	0.105	1
Ascc2	0.174871	-1.769	0	0.105	1
Nf2	0.174871	-1.74248	0	0.105	1
Tns3	0.174871	-1.63945	0	0.105	1
Cnrip1	0.174871	-1.48767	0	0.105	1
Pnpt1	0.174871	-2.894	0	0.105	1
Lcp2	0.174871	-1.72153	0	0.105	1
Cdkn2aipnl	0.174871	-1.19138	0	0.105	1
Gemin5	0.174871	-1.53544	0	0.105	1
Natd1	0.174871	-1.34856	0	0.105	1
Mfap4	0.174871	-4.05731	0	0.105	1
Arhgap44	0.174871	-2.77143	0	0.105	1
Ctns	0.174871	-1.59122	0	0.105	1
Rph3al	0.174871	-1.68965	0	0.105	1
Gosr1	0.174871	-1.73395	0	0.105	1
Ksr1	0.174871	-2.75414	0	0.105	1
Ccl8	0.174871	-2.92746	0	0.105	1
Rad51d	0.174871	-1.41067	0	0.105	1
Nme2	0.174871	-1.54227	0	0.105	1
Tbkbp1	0.174871	-1.70519	0	0.105	1
Ghdc	0.174871	-2.22697	0	0.105	1
Gjc1	0.174871	-3.34348	0	0.105	1
Cdc27	0.174871	-2.10876	0	0.105	1
Cdr2l	0.174871	-1.75691	0	0.105	1
Trim65	0.174871	-2.21286	0	0.105	1
Cygb	0.174871	-3.8473	0	0.105	1
Sgsh	0.174871	-1.42847	0	0.105	1
Notum	0.174871	-1.70092	0	0.105	1
Dcxr	0.174871	-1.81762	0	0.105	1
Fasn	0.174871	-3.74232	0	0.105	1
Heatr1	0.174871	-2.21348	0	0.105	1
Zkscan4	0.174871	-2.11427	0	0.105	1
H4c8	0.174871	-1.90159	0	0.105	1
H3c6	0.174871	-1.5194	0	0.105	1
H4c1	0.174871	-1.21169	0	0.105	1
Aspn	0.174871	-4.29862	0	0.105	1
Ctla2b	0.174871	-2.05493	0	0.105	1
Zfp58	0.174871	-1.59379	0	0.105	1
Zfp87	0.174871	-1.92695	0	0.105	1
Zfp748	0.174871	-1.80513	0	0.105	1
Nr2f1	0.174871	-2.32845	0	0.105	1
Naip2	0.174871	-2.5255	0	0.105	1
Fst	0.174871	-2.48888	0	0.105	1
Dtd2	0.174871	-2.09399	0	0.105	1
Mipol1	0.174871	-1.76032	0	0.105	1
Six4	0.174871	-1.57968	0	0.105	1
Dnal1	0.174871	-1.38776	0	0.105	1
Batf	0.174871	-2.35655	0	0.105	1
Gpr68	0.174871	-2.89975	0	0.105	1
Tmem251	0.174871	-1.99386	0	0.105	1
Vrk1	0.174871	-1.2042	0	0.105	1
Cdca7l	0.174871	-1.81088	0	0.105	1
Wdr70	0.174871	-1.72855	0	0.105	1
Pop1	0.174871	-2.04861	0	0.105	1
Bop1	0.174871	-3.3543	0	0.105	1
Rrp7a	0.174871	-1.75362	0	0.105	1
Prpf40b	0.174871	-1.75402	0	0.105	1
Aaas	0.174871	-1.6606	0	0.105	1
Trap1	0.174871	-1.39943	0	0.105	1
Adcy9	0.174871	-1.43835	0	0.105	1
Tfap4	0.174871	-1.39156	0	0.105	1
Spidr	0.174871	-1.97975	0	0.105	1
Vpreb1	0.174871	-2.21652	0	0.105	1
Eif2b5	0.174871	-3.99824	0	0.105	1
Apod	0.174871	-4.73362	0	0.105	1
Timmdc1	0.174871	-1.95713	0	0.105	1
Slc35a5	0.174871	-1.82295	0	0.105	1
Itsn1	0.174871	-2.01236	0	0.105	1
C2cd2	0.174871	-2.04496	0	0.105	1
Zfp40	0.174871	-1.50556	0	0.105	1
Wdr4	0.174871	-1.61948	0	0.105	1
Notch3	0.174871	-3.48759	0	0.105	1
Trim39	0.174871	-2.41639	0	0.105	1
Ptk7	0.174871	-1.75318	0	0.105	1
Vmac	0.174871	-2.01262	0	0.105	1
Fbxl17	0.174871	-1.47304	0	0.105	1
Mtcl1	0.174871	-1.08456	0	0.105	1
Impact	0.174871	-2.19076	0	0.105	1
B4galt6	0.174871	-1.70359	0	0.105	1
Gypc	0.174871	-1.8443	0	0.105	1
Tmco6	0.174871	-3.05368	0	0.105	1
Pcdhb7	0.174871	-1.20168	0	0.105	1
Piezo2	0.174871	-2.15446	0	0.105	1
Zfp516	0.174871	-1.92725	0	0.105	1
Zdhhc24	0.174871	-1.32701	0	0.105	1
Macrod1	0.174871	-1.37095	0	0.105	1
Spindoc	0.174871	-2.80707	0	0.105	1
2700081O15Rik	0.174871	-1.60255	0	0.105	1
Cyb561a3	0.174871	-1.97202	0	0.105	1
Ms4a7	0.174871	-2.65209	0	0.105	1
Ric1	0.174871	-3.44693	0	0.105	1
Prkg1	0.174871	-1.5391	0	0.105	1
Entpd7	0.174871	-1.69829	0	0.105	1
Slf2	0.174871	-1.41782	0	0.105	1
Tlx1	0.174871	-1.77754	0	0.105	1
Calhm2	0.174871	-2.23565	0	0.105	1
Psmb3	0.17493	-0.696587	0.389	0.632	1
Tspan4	0.17493	0.190186	0.611	0.421	1
Eva1b	0.175099	-1.04749	0.389	0.579	1
Exosc8	0.175108	-2.50683	0.111	0.263	1
Camta1	0.175108	-1.77265	0.111	0.263	1
Bloc1s4	0.175108	-2.13796	0.111	0.263	1
Crlf3	0.175108	-1.63938	0.111	0.263	1
Rab12	0.175108	-2.06319	0.111	0.263	1
Tmx2	0.175465	1.04776	0.222	0.053	1
Gnl2	0.175465	0.527703	0.222	0.053	1
Zc3h12a	0.175465	0.272011	0.222	0.053	1
Prpf31	0.175465	0.962001	0.222	0.053	1
Itpripl2	0.175465	0.534715	0.222	0.053	1
Nufip1	0.175465	-0.969047	0.222	0.053	1
Map2k1	0.175465	0.980475	0.222	0.053	1
Flt4	0.175465	-0.568511	0.222	0.053	1
Aggf1	0.175465	-0.941551	0.222	0.053	1
Hsf1	0.175465	1.19541	0.222	0.053	1
Wrb	0.175465	0.523005	0.222	0.053	1
Lims2	0.175465	1.34057	0.222	0.053	1
mt-Nd1	0.176307	-1.02878	1	1	1
Heca	0.176358	1.66705	0.333	0.158	1
Arl2bp	0.176358	1.65743	0.333	0.158	1
3830406C13Rik	0.176358	1.63004	0.333	0.158	1
Ifi35	0.176358	1.70074	0.333	0.158	1
Rnaseh2c	0.176358	1.90818	0.333	0.158	1
Mrpl18	0.179631	-0.411477	0.222	0.526	1
Immt	0.180101	-0.992012	0.167	0.368	1
Ino80b	0.180101	-1.0248	0.167	0.368	1
Tmem160	0.180101	-0.258567	0.167	0.368	1
Mgat2	0.180101	-1.1808	0.167	0.368	1
Snrpd1	0.180121	0.954892	0.556	0.474	1
Psap	0.180309	0.789675	0.944	0.737	1
Cd47	0.180438	0.626581	0.778	0.632	1
Lmna	0.181365	1.01879	0.722	0.474	1
Grrp1	0.181365	0.493246	0.722	0.474	1
Gabarapl2	0.181365	1.37346	0.667	0.526	1
Pycr2	0.182288	1.51592	0.278	0.105	1
Rbm17	0.182288	1.78556	0.278	0.105	1
Ehmt1	0.182288	2.29871	0.278	0.105	1
C1qtnf12	0.182288	1.33567	0.278	0.105	1
Tmem33	0.182288	1.27214	0.278	0.105	1
Pold3	0.182288	2.07431	0.278	0.105	1
Spock2	0.182288	1.50252	0.278	0.105	1
Tax1bp3	0.182288	1.49371	0.278	0.105	1
Ccnd3	0.182288	2.84779	0.278	0.105	1
Sncaip	0.182288	2.59023	0.278	0.105	1
Ro60	0.182372	-1.01522	0.222	0.421	1
Thbd	0.182372	-1.77615	0.222	0.421	1
Gcsh	0.182372	-1.27881	0.222	0.421	1
Msi2	0.182372	-1.07273	0.222	0.421	1
Rab1a	0.182443	-1.03625	0.278	0.526	1
Mrpl57	0.182443	1.24601	0.5	0.316	1
Sugt1	0.182443	1.37662	0.5	0.316	1
Sh3glb1	0.183728	-0.759994	0.611	0.737	1
Usp50	0.183753	-1.61577	0.056	0.211	1
Sms	0.183753	-1.56611	0.056	0.211	1
Tacc2	0.183753	-1.35544	0.056	0.211	1
Ddx10	0.183753	-1.40697	0.056	0.211	1
Pelp1	0.183753	-1.38417	0.056	0.211	1
Psme3	0.183753	-1.87208	0.056	0.211	1
Pxdn	0.183753	-2.24973	0.056	0.211	1
Fam111a	0.183753	-1.60544	0.056	0.211	1
Tmem131	0.183847	-1.5983	0.111	0.316	1
Tanc1	0.183847	0.226427	0.111	0.316	1
Myadm	0.183847	-1.16863	0.111	0.316	1
H2-T22	0.184325	0.53537	0.556	0.316	1
Pum2	0.184325	-1.04872	0.333	0.526	1
Wwtr1	0.185727	-0.953689	0.389	0.579	1
Mitd1	0.188224	1.75974	0.389	0.211	1
Ppp4c	0.188224	1.81221	0.389	0.211	1
Myo6	0.188224	1.92456	0.389	0.211	1
Rpp30	0.188224	1.30073	0.389	0.211	1
Adss	0.189623	2.22418	0.333	0.158	1
[truncated: 8,218 more rows]

## Sheet: 2 Neutrophils-male vs female
Gene	p value	Average log2 fold change	Fraction of cells expressing the gene in male cluster	Fraction of cells expressing the gene in female cluster	Adjusted p value
S100a9	0.000291112	-1.22428	0.898	0.959	1
Man2b1	0.000511522	1.63172	0.441	0.122	1
Lilr4b	0.000513758	-1.18482	0.237	0.571	1
Sh3bp1	0.000711094	2.74832	0.322	0.061	1
Hspa8	0.000803411	1.15014	0.61	0.347	1
Tle5	0.000809204	2.80726	0.305	0.061	1
Eif2s3y	0.000901517	6.26272	0.203	0	1
S100a8	0.00119359	-0.982023	0.898	0.959	1
Rbms1	0.0012034	-2.12792	0.169	0.429	1
Cdkn1b	0.00151043	1.94993	0.424	0.143	1
S100a6	0.00152653	-0.784644	0.729	0.918	1
Cd300c2	0.00175313	0.957947	0.729	0.531	1
Cd33	0.00183075	1.26802	0.627	0.388	1
Ypel3	0.00191166	0.775221	0.831	0.653	1
H2bc4	0.00200447	1.78269	0.458	0.184	1
Taldo1	0.00235808	0.905	0.831	0.612	1
Sipa1	0.0025454	2.83505	0.254	0.041	1
Zfp281	0.00262843	-0.961386	0.085	0.347	1
Rps18	0.00267459	1.19167	0.508	0.245	1
Daglb	0.00269573	5.71879	0.169	0	1
Tex261	0.00269573	5.60402	0.169	0	1
Yif1a	0.00269573	5.74368	0.169	0	1
Psmc2	0.00277101	2.90361	0.22	0.02	1
Park7	0.00310596	2.81823	0.271	0.061	1
Gnb2	0.00322528	0.891284	0.695	0.49	1
Plek	0.00327805	-0.756105	0.525	0.796	1
Lgals3	0.00334416	-2.13099	0.119	0.347	1
Npepps	0.00335743	-3.0385	0.017	0.184	1
Pilrb2	0.00339172	1.92131	0.356	0.122	1
Dhrs7	0.00366714	1.48359	0.356	0.122	1
Cxcl2	0.00414021	-0.835809	0.695	0.816	1
Dync1i2	0.00437391	2.904	0.203	0.02	1
Sfpq	0.00460965	2.76431	0.254	0.061	1
Eml4	0.0046213	5.72855	0.153	0	1
Mrps14	0.00468372	2.57799	0.203	0.02	1
Rps13	0.00510231	0.694138	0.814	0.714	1
Clec4d	0.00519865	-0.685214	0.458	0.714	1
Ybx1	0.00538695	1.21827	0.542	0.327	1
Bcl7b	0.00607506	-5.40343	0	0.122	1
Smarca4	0.00607506	-5.96699	0	0.122	1
Il18	0.00607506	-5.5247	0	0.122	1
Ppp2r1a	0.00610309	-3.4768	0.017	0.163	1
Ifngr1	0.00633264	1.29863	0.475	0.265	1
Gsap	0.00644256	1.97392	0.288	0.082	1
Lst1	0.00709231	0.760238	0.814	0.653	1
Srgn	0.00726664	-0.476434	1	1	1
Rps15	0.00731749	0.807687	0.644	0.49	1
Marcksl1	0.00746131	-0.868831	0.407	0.694	1
Clec2d	0.00750733	1.34572	0.475	0.265	1
Anxa11	0.00755574	-1.00959	0.119	0.347	1
Sqor	0.00788591	5.22783	0.136	0	1
Ddost	0.00788591	5.16586	0.136	0	1
Rfc2	0.00788591	5.45304	0.136	0	1
Ngdn	0.00788591	5.33716	0.136	0	1
Stag1	0.00788591	5.55015	0.136	0	1
Mrps7	0.00788591	5.18686	0.136	0	1
4930453N24Rik	0.00788591	5.52537	0.136	0	1
Ddx3y	0.00788591	5.61103	0.136	0	1
S100a11	0.0080263	-0.663769	0.949	0.898	1
Rps27l	0.00808977	1.35172	0.407	0.184	1
Ppp1cc	0.00908031	2.45316	0.237	0.061	1
Mrpl33	0.0092336	-1.17944	0.356	0.551	1
Ptgs2	0.00953087	-1.54038	0.22	0.429	1
Vim	0.00967865	-1.25772	0.153	0.388	1
Dmxl2	0.00976597	-1.33073	0.186	0.429	1
Ptpn22	0.0100317	3.98314	0.169	0.02	1
Cd164	0.0101285	-2.16277	0.068	0.245	1
Emp3	0.0102607	-1.66566	0.085	0.265	1
Vdac1	0.0103779	3.33517	0.169	0.02	1
H2-Q10	0.0103903	-1.37113	0.339	0.551	1
Phf14	0.0107347	-2.68447	0.034	0.184	1
Anxa2	0.010949	-1.06397	0.458	0.612	1
Tspo	0.0110075	-0.777336	0.661	0.816	1
Obp2a	0.0110974	-1.4816	0.051	0.122	1
Ndufb6	0.0116889	1.94308	0.237	0.061	1
Spg21	0.0120388	2.58296	0.203	0.041	1
Pbx2	0.0123519	2.25503	0.237	0.061	1
Il15	0.012687	-1.7783	0.034	0.184	1
Cops5	0.0127216	-4.73963	0	0.102	1
Kdm6a	0.0127216	-5.27197	0	0.102	1
Cd9	0.0128382	-0.818332	0.695	0.878	1
Steap4	0.0128812	-3.58463	0.017	0.143	1
Tmem127	0.0131132	-2.14498	0.034	0.184	1
Adipor2	0.0131895	-2.63167	0.051	0.204	1
Evi2	0.0133817	-3.05248	0.017	0.143	1
Fam131c	0.013406	3.90956	0.068	0	1
Emd	0.0134108	5.3794	0.119	0	1
Trappc3	0.0134108	5.19707	0.119	0	1
St3gal5	0.0134108	5.51608	0.119	0	1
Mphosph10	0.0134108	5.54687	0.119	0	1
Pex7	0.0134108	5.15636	0.119	0	1
Psmd7	0.0134108	4.91957	0.119	0	1
Pibf1	0.0134108	5.0785	0.119	0	1
Scamp2	0.0134108	5.60179	0.119	0	1
Igf2r	0.0134108	5.45445	0.119	0	1
Cxcr2	0.0136864	-0.679311	0.542	0.755	1
Chmp4b	0.0138314	-0.782326	0.525	0.714	1
Gngt2	0.0139298	0.601431	0.746	0.51	1
Trim30d	0.014603	-1.03608	0.186	0.408	1
Fam111a	0.0149405	-1.76725	0.085	0.265	1
Med21	0.0152405	2.37756	0.22	0.061	1
Snrpb	0.0155574	1.3583	0.373	0.163	1
Zswim4	0.0155596	-2.15868	0.017	0.143	1
Rab11b	0.0158102	1.2988	0.322	0.122	1
3110082I17Rik	0.0161601	1.98344	0.203	0.041	1
mt-Nd1	0.016286	-0.881718	0.407	0.694	1
Rpl38	0.0164058	0.775378	0.831	0.735	1
Rpl36	0.0170378	0.71615	0.746	0.592	1
Utp3	0.0172783	3.04399	0.153	0.02	1
Sfxn5	0.0172967	-1.9159	0.051	0.204	1
Birc3	0.0175313	1.41461	0.237	0.061	1
Nsa2	0.017816	-1.74471	0.051	0.204	1
Slc25a11	0.0178623	2.86498	0.153	0.02	1
Idnk	0.0179477	2.39038	0.22	0.061	1
Plin2	0.0179991	1.41948	0.237	0.061	1
Ifitm1	0.0184576	-0.721727	0.644	0.857	1
Csk	0.0190032	1.36889	0.339	0.143	1
H2az2	0.0193813	1.868	0.305	0.143	1
Arl4c	0.0199785	1.75259	0.22	0.061	1
Ndufab1	0.0200322	2.29932	0.186	0.041	1
Vamp8	0.020045	0.733585	0.661	0.469	1
Tob1	0.0203748	2.47123	0.153	0.02	1
Rhoh	0.0207096	-2.1591	0.034	0.163	1
Ndufb8	0.020839	1.61225	0.305	0.122	1
Grina	0.020891	-0.467328	0.695	0.857	1
Ccnt1	0.0210492	2.55526	0.153	0.02	1
Wfdc17	0.0211027	-1.32231	0.237	0.449	1
Exosc4	0.0213936	-2.32354	0.034	0.163	1
Suco	0.021461	-1.56754	0.102	0.286	1
Cmpk1	0.0216305	1.91594	0.22	0.061	1
Phf5a	0.0218487	2.20319	0.186	0.041	1
Rpl15	0.0227342	0.828428	0.525	0.347	1
Nucks1	0.0227653	4.95043	0.102	0	1
Sh3glb2	0.0227653	4.86341	0.102	0	1
Ptpa	0.0227653	4.83849	0.102	0	1
Rprd1b	0.0227653	5.03806	0.102	0	1
Yipf1	0.0227653	4.95276	0.102	0	1
Ino80b	0.0227653	5.13453	0.102	0	1
Polr2i	0.0227653	5.34929	0.102	0	1
Uchl3	0.0227653	4.96253	0.102	0	1
Rbm5	0.0227653	4.90978	0.102	0	1
Fam120a	0.0227653	4.6184	0.102	0	1
Ldah	0.0227653	4.79703	0.102	0	1
Mrpl28	0.0227653	4.67924	0.102	0	1
Cyp4f13	0.0227653	4.98433	0.102	0	1
Gsto1	0.0227653	5.0053	0.102	0	1
Tmem14c	0.0236205	0.937018	0.475	0.265	1
Cox20	0.023807	1.7886	0.186	0.041	1
Zfhx3	0.0239496	2.1901	0.237	0.082	1
Rpl41	0.0242954	0.309269	0.966	0.98	1
Siglece	0.0243688	1.06465	0.475	0.286	1
Itgb1bp1	0.0244009	-2.18924	0.051	0.184	1
Tma7	0.0244011	1.01108	0.492	0.388	1
Ndufv2	0.0244927	1.76177	0.186	0.041	1
Rps21	0.0247308	0.624816	0.915	0.816	1
Prpf40a	0.0250237	1.51487	0.254	0.082	1
Pbxip1	0.0250933	1.16598	0.339	0.143	1
Pdap1	0.0251955	1.05156	0.186	0.041	1
Bmp2k	0.0252551	-1.10629	0.068	0.224	1
Coq10b	0.0261534	1.55377	0.288	0.122	1
Per1	0.0261534	1.78172	0.288	0.122	1
Dad1	0.0262364	1.1694	0.356	0.163	1
Lyz2	0.0265817	-0.9907	0.136	0.327	1
Mrpl44	0.0266836	-5.06287	0	0.082	1
Ctse	0.0266836	-4.74178	0	0.082	1
Jade1	0.0266836	-4.55094	0	0.082	1
Wdr77	0.0266836	-4.98204	0	0.082	1
Hsdl2	0.0266836	-4.54089	0	0.082	1
Tpcn2	0.0266836	-5.2414	0	0.082	1
Myo18a	0.0266836	-4.93111	0	0.082	1
Tob2	0.0266836	-5.27709	0	0.082	1
Lpp	0.0266836	-5.29073	0	0.082	1
Rpl7l1	0.0266836	-4.86228	0	0.082	1
Zc3h12a	0.026739	1.67209	0.288	0.122	1
Btbd10	0.0269399	-3.15856	0.017	0.122	1
Ndufa1	0.0269664	1.46856	0.356	0.184	1
Cd44	0.0271929	-0.77139	0.559	0.694	1
Picalm	0.0272134	-0.667011	0.559	0.755	1
Ints12	0.0274179	-2.0004	0.051	0.184	1
Rest	0.0274179	-2.21544	0.051	0.184	1
Rpl27	0.0274338	0.563442	0.746	0.531	1
Cox6a1	0.0275658	0.949973	0.441	0.265	1
Ibtk	0.0279542	-2.68977	0.017	0.122	1
Mnt	0.0279542	-2.59564	0.017	0.122	1
Otulinl	0.0283676	1.06221	0.305	0.122	1
Wdr1	0.0284238	1.81653	0.237	0.082	1
Clic1	0.0285728	-0.579267	0.695	0.816	1
Elof1	0.0286257	3.86639	0.136	0.02	1
Mrps24	0.0289799	0.942814	0.288	0.102	1
Pde1b	0.0290014	-2.61354	0.017	0.122	1
Gpank1	0.0290014	-2.73481	0.017	0.122	1
Rgs1	0.0291184	1.99777	0.237	0.082	1
Upf2	0.0294627	2.95769	0.169	0.041	1
Prxl2b	0.0294943	1.82474	0.254	0.102	1
Kctd12	0.0297938	-0.760886	0.22	0.429	1
E2f4	0.0300821	-2.34766	0.017	0.122	1
Ppard	0.0300821	-2.74659	0.017	0.122	1
Atp5j	0.0302281	0.897739	0.542	0.449	1
Fyb	0.0302726	0.884435	0.441	0.245	1
Smim4	0.0303166	2.26747	0.169	0.041	1
Hdc	0.0305708	-0.615886	0.695	0.837	1
Ninj1	0.0309306	0.788428	0.695	0.592	1
0610009B22Rik	0.0315567	3.03543	0.136	0.02	1
Col4a3bp	0.0315567	2.51245	0.136	0.02	1
Fibp	0.0315567	2.69155	0.136	0.02	1
Ifit1bl2	0.0316372	-1.5257	0.051	0.184	1
Rgs10	0.0319444	2.03702	0.203	0.061	1
Atp5g1	0.0319444	1.98259	0.203	0.061	1
Dnajc15	0.0320883	2.19131	0.169	0.041	1
Xpa	0.0325893	2.54129	0.136	0.02	1
Med8	0.033007	2.31148	0.169	0.041	1
Nfkbiz	0.0331837	-0.732284	0.322	0.531	1
Skil	0.0335935	0.798746	0.678	0.49	1
Rb1cc1	0.033816	2.24247	0.22	0.082	1
Hnrnpa2b1	0.0338176	1.09033	0.407	0.245	1
Cox7a2l	0.0338237	1.64443	0.254	0.102	1
Dda1	0.033948	2.15753	0.169	0.041	1
Rpl6	0.0340388	0.878903	0.593	0.469	1
Dazap2	0.0342089	0.957402	0.525	0.306	1
Syf2	0.0344819	-0.967471	0.322	0.49	1
Spcs2	0.0346305	1.42179	0.305	0.143	1
Chtop	0.0347415	2.40072	0.136	0.02	1
Cnot6l	0.0347415	2.50601	0.136	0.02	1
Igsf8	0.034912	2.20674	0.169	0.041	1
Prdx6	0.0352099	0.747085	0.525	0.327	1
Wfdc21	0.035352	-0.982197	0.153	0.327	1
Pnpla7	0.0353827	1.70574	0.254	0.102	1
Mrps33	0.0355075	1.06263	0.339	0.163	1
Reep5	0.0358063	1.08557	0.508	0.347	1
I830077J02Rik	0.0358458	-1.66524	0.068	0.204	1
Ankrd13a	0.0358624	2.34514	0.136	0.02	1
Tyrobp	0.0358937	-0.234214	0.983	1	1
Hnrnpa3	0.036204	1.36721	0.288	0.122	1
Pgk1	0.0362143	-0.901547	0.169	0.367	1
Il4ra	0.0367775	-1.16673	0.186	0.367	1
Pi16	0.0367889	-1.84689	0.068	0.204	1
St3gal1	0.037014	1.98197	0.136	0.02	1
Cnbp	0.0372275	0.907271	0.373	0.204	1
Rps11	0.037676	0.645224	0.661	0.531	1
Ginm1	0.0379451	1.92341	0.169	0.041	1
Pin1	0.0379451	2.02498	0.169	0.041	1
Sema4d	0.0379451	1.30075	0.169	0.041	1
Ankrd44	0.0381313	0.785741	0.305	0.122	1
Rbis	0.0381481	1.47653	0.203	0.061	1
0610012G03Rik	0.0381481	1.25662	0.203	0.061	1
Mrpl57	0.038368	1.25333	0.305	0.143	1
Fbxo11	0.0384719	-1.30581	0.051	0.184	1
Retnlg	0.0385602	0.142519	0.254	0.469	1
Hspa14	0.0386636	4.67716	0.085	0	1
Lpcat4	0.0386636	4.53963	0.085	0	1
C1galt1c1	0.0386636	4.35611	0.085	0	1
Mycbp	0.0386636	4.71924	0.085	0	1
Yrdc	0.0386636	4.81065	0.085	0	1
Pgm2	0.0386636	4.62862	0.085	0	1
Gtf3a	0.0386636	4.90543	0.085	0	1
Bpgm	0.0386636	4.38209	0.085	0	1
Zfp865	0.0386636	4.62266	0.085	0	1
Bcl7c	0.0386636	4.4464	0.085	0	1
1700021F05Rik	0.0386636	4.64766	0.085	0	1
Hmg20b	0.0386636	4.61912	0.085	0	1
Elavl3	0.0386636	4.31708	0.085	0	1
1110032A03Rik	0.0386636	4.82649	0.085	0	1
Arid3b	0.0386636	4.91205	0.085	0	1
Ankfy1	0.0386636	4.38556	0.085	0	1
Hmgcs1	0.0386636	4.58741	0.085	0	1
Adam17	0.0386636	4.81481	0.085	0	1
Atad2	0.0386636	4.33	0.085	0	1
Creld2	0.0386636	4.46785	0.085	0	1
Mfsd5	0.0386636	4.38268	0.085	0	1
Ranbp1	0.0386636	4.68107	0.085	0	1
Slc49a4	0.0386636	5.06132	0.085	0	1
Ltn1	0.0386636	4.61382	0.085	0	1
Mrpl21	0.0386636	4.61077	0.085	0	1
Lamtor2	0.0392634	1.40843	0.322	0.163	1
U2surp	0.0400894	1.60328	0.169	0.041	1
R3hdm4	0.0401464	1.61938	0.288	0.143	1
Ptp4a2	0.0408367	1.47906	0.322	0.163	1
Mark3	0.0419402	-2.16085	0.034	0.143	1
Clk1	0.0422903	0.742509	0.492	0.286	1
Hras	0.0423617	2.01736	0.186	0.061	1
Med15	0.043255	-0.948034	0.034	0.143	1
Zfp36	0.0433548	-0.480001	0.763	0.837	1
Ppp1r15a	0.0436007	-0.559336	0.322	0.51	1
Nfkbid	0.0436604	0.859098	0.508	0.347	1
Rbm3	0.0438438	0.671378	0.593	0.469	1
Slc2a1	0.0441281	-1.65602	0.119	0.265	1
Txnip	0.0443544	0.728672	0.627	0.51	1
Cxcl10	0.0446045	-0.839268	0.034	0.143	1
Irak3	0.0446045	-1.62495	0.034	0.143	1
Capg	0.0456461	-2.67571	0.051	0.163	1
Emilin2	0.0457628	-1.3153	0.237	0.388	1
Sell	0.0458021	-1.5565	0.085	0.224	1
Ywhah	0.0459614	1.16586	0.305	0.143	1
Prdx2	0.0459894	-1.50864	0.034	0.143	1
Ier3	0.0463707	-0.527566	0.542	0.735	1
Aplp2	0.0472116	1.33227	0.288	0.143	1
Abr	0.0472807	1.26777	0.407	0.265	1
Il1rap	0.0474534	-1.48057	0.102	0.245	1
Ndufb5	0.0479669	1.41194	0.271	0.122	1
Gpx1	0.0480707	0.640886	0.627	0.408	1
Tet3	0.0482525	2.26544	0.153	0.041	1
Yme1l1	0.0487694	3.52184	0.119	0.02	1
Sdhaf2	0.0487694	3.19986	0.119	0.02	1
Narf	0.0488679	-1.91612	0.034	0.143	1
Mif	0.0488869	-1.49723	0.203	0.347	1
Ppp3ca	0.049133	1.35386	0.288	0.143	1
Taf12	0.0493659	-1.94249	0.068	0.184	1
Calr4	0.0495498	4.90337	0.102	0	1
Tmem160	0.0496019	2.34498	0.153	0.041	1
Lamtor4	0.0496535	1.51467	0.356	0.204	1
H3f3b	0.0497197	0.375209	1	1	1
Phf21a	0.0498525	-1.30588	0.068	0.204	1
Hprt	0.050346	2.76449	0.119	0.02	1
Rnf166	0.050346	3.16226	0.119	0.02	1
Chchd1	0.050346	2.63084	0.119	0.02	1
Gpr65	0.050346	2.93062	0.119	0.02	1
Wdr33	0.050346	2.61243	0.119	0.02	1
Sgk1	0.0503629	-1.52854	0.034	0.143	1
Phb2	0.0504721	1.56371	0.186	0.061	1
Rnf187	0.0504721	1.65953	0.186	0.061	1
Mdm2	0.0506423	-2.00247	0.068	0.184	1
Sp3	0.0509828	-1.42118	0.051	0.163	1
Fpr2	0.0509828	-1.99323	0.051	0.163	1
B3gnt8	0.0509828	2.25827	0.153	0.041	1
Ssr1	0.0509828	2.03472	0.153	0.041	1
Rbm42	0.0515316	1.16324	0.22	0.082	1
Fosl2	0.0518221	-0.973154	0.22	0.408	1
Fgl2	0.0518805	-0.919312	0.441	0.633	1
Ccnt2	0.0519652	2.7659	0.119	0.02	1
Ssr3	0.0519652	3.06964	0.119	0.02	1
2510039O18Rik	0.0519652	2.68964	0.119	0.02	1
Etfb	0.0519652	2.65881	0.119	0.02	1
Lyl1	0.0519652	2.67517	0.119	0.02	1
Lypla1	0.0520002	-3.03975	0.017	0.102	1
Ccdc115	0.0520002	-2.74285	0.017	0.102	1
Sgms2	0.0520002	-3.20885	0.017	0.102	1
Sertad3	0.0520002	-3.4841	0.017	0.102	1
Ric8a	0.0520002	-3.02104	0.017	0.102	1
Stard3	0.0520002	-3.3719	0.017	0.102	1
Ctsb	0.0520642	-0.649853	0.373	0.551	1
Pcif1	0.0523788	0.999313	0.254	0.102	1
Ubr3	0.0523958	2.18529	0.153	0.041	1
Srsf9	0.0523958	2.66866	0.153	0.041	1
Lsm12	0.0527092	-1.10533	0.085	0.224	1
Gapdh	0.052765	-0.595404	0.627	0.714	1
Ndufa8	0.0534135	1.1752	0.322	0.163	1
Tcea1	0.0536277	2.34165	0.119	0.02	1
Aco2	0.0536277	2.46084	0.119	0.02	1
Ppm1b	0.0536277	2.64692	0.119	0.02	1
Chuk	0.0536277	2.39655	0.119	0.02	1
Cdk12	0.0538414	2.04936	0.153	0.041	1
Marf1	0.0538414	2.07995	0.153	0.041	1
Apc	0.0538414	2.42777	0.153	0.041	1
Trp53inp1	0.0539065	-2.61206	0.017	0.102	1
N4bp2	0.0539065	-2.63016	0.017	0.102	1
Zkscan3	0.0539065	-2.77536	0.017	0.102	1
Gxylt1	0.0539065	-2.64053	0.017	0.102	1
Aamp	0.0539103	1.37778	0.22	0.082	1
Pfdn2	0.0542242	1.39692	0.271	0.122	1
Mrps18c	0.0543266	1.75834	0.186	0.061	1
Slc3a2	0.0543266	1.63273	0.186	0.061	1
Nrd1	0.0545659	1.81473	0.203	0.082	1
Rtn4	0.0545673	-1.1028	0.186	0.347	1
Cox17	0.054595	0.658892	0.644	0.51	1
Mfsd14b	0.0553201	2.26115	0.153	0.041	1
Slc25a3	0.0553241	0.685881	0.441	0.265	1
Hmgb1	0.0562734	1.0097	0.407	0.245	1
Zmynd11	0.0563801	1.34535	0.22	0.082	1
Atg9a	0.0564504	-5.52392	0	0.061	1
Psmd1	0.0564504	-5.01312	0	0.061	1
Irf6	0.0564504	-4.33934	0	0.061	1
Otud1	0.0564504	-4.76531	0	0.061	1
Cdk16	0.0564504	-5.27351	0	0.061	1
Taf1	0.0564504	-4.06643	0	0.061	1
Rbbp7	0.0564504	-4.30105	0	0.061	1
Muc1	0.0564504	-4.47378	0	0.061	1
Lysmd1	0.0564504	-4.51852	0	0.061	1
Fmo5	0.0564504	-4.47487	0	0.061	1
Sass6	0.0564504	-4.62536	0	0.061	1
Tifa	0.0564504	-4.54994	0	0.061	1
Dpysl5	0.0564504	-4.43063	0	0.061	1
Myl2	0.0564504	-4.47313	0	0.061	1
Pptc7	0.0564504	-5.33506	0	0.061	1
Lrch4	0.0564504	-4.22816	0	0.061	1
Zfp467	0.0564504	-4.2452	0	0.061	1
Setd5	0.0564504	-4.25918	0	0.061	1
Ybx3	0.0564504	-4.54917	0	0.061	1
Vmn1r85	0.0564504	-4.33596	0	0.061	1
Bloc1s3	0.0564504	-4.70657	0	0.061	1
Il18bp	0.0564504	-4.60473	0	0.061	1
Gcc2	0.0564504	-4.97206	0	0.061	1
Wdr18	0.0564504	-4.28828	0	0.061	1
Polr3b	0.0564504	-4.10855	0	0.061	1
Pcid2	0.0564504	-4.44653	0	0.061	1
Pcm1	0.0564504	-4.52077	0	0.061	1
Nacc1	0.0564504	-4.74719	0	0.061	1
Taf1c	0.0564504	-4.83412	0	0.061	1
Slc7a5	0.0564504	-4.38206	0	0.061	1
Ap3m1	0.0564504	-4.5414	0	0.061	1
Pafah1b2	0.0564504	-4.37258	0	0.061	1
Map2k1	0.0564504	-4.41213	0	0.061	1
Taf15	0.0564504	-4.28429	0	0.061	1
Kcnj2	0.0564504	-4.5313	0	0.061	1
Atxn3	0.0564504	-4.62956	0	0.061	1
Ly6d	0.0564504	-4.43975	0	0.061	1
Apol8	0.0564504	-5.295	0	0.061	1
Dnm1l	0.0564504	-4.55731	0	0.061	1
Ncbp2	0.0564504	-4.37697	0	0.061	1
Zbtb11	0.0564504	-4.60104	0	0.061	1
Cldn9	0.0564504	-3.88508	0	0.061	1
Rsph1	0.0564504	-4.07652	0	0.061	1
Pik3c3	0.0564504	-4.36167	0	0.061	1
Fam13b	0.0564504	-4.11063	0	0.061	1
Ctnna1	0.0564504	-4.04585	0	0.061	1
Sh3glb1	0.0567826	-0.608934	0.441	0.633	1
Emg1	0.0568325	1.83905	0.153	0.041	1
Glyr1	0.0568325	1.8637	0.153	0.041	1
Atp5l	0.056951	0.604493	0.814	0.755	1
Dnajc19	0.0570861	2.10357	0.119	0.02	1
Cd81	0.057831	1.51801	0.237	0.102	1
Dctn3	0.0578511	1.26727	0.305	0.163	1
Chil1	0.0578944	-3.31968	0.017	0.102	1
Heatr1	0.0578944	-2.42343	0.017	0.102	1
Psmd8	0.058163	0.886396	0.254	0.102	1
Supt4a	0.058173	-0.601718	0.407	0.592	1
Ankra2	0.0583791	1.835	0.153	0.041	1
Ap2m1	0.0583791	1.78825	0.153	0.041	1
Itsn2	0.0584237	1.44117	0.186	0.061	1
Rnf149	0.0587639	-0.384458	0.814	0.959	1
Ap4s1	0.0588837	2.08844	0.119	0.02	1
Slc25a28	0.0588837	2.28112	0.119	0.02	1
Sap18	0.0590692	1.46154	0.237	0.102	1
Clec4e	0.0591981	-0.727317	0.424	0.592	1
Snx20	0.0593681	0.752468	0.644	0.49	1
Calm1	0.0597048	0.686294	0.831	0.673	1
Eif6	0.0597855	1.72202	0.203	0.082	1
Txnl4a	0.0599606	1.85028	0.153	0.041	1
Rit1	0.0599785	-2.13163	0.017	0.102	1
D5Ertd579e	0.0599785	-1.96368	0.017	0.102	1
Gatd1	0.0599785	-2.19227	0.017	0.102	1
Prpf8	0.0599785	-2.11119	0.017	0.102	1
Kansl2	0.0599785	-2.16128	0.017	0.102	1
Cpsf6	0.0607281	0.898496	0.119	0.02	1
Fxr2	0.0607281	2.08	0.119	0.02	1
Rogdi	0.0607281	1.54334	0.119	0.02	1
Aldh3b1	0.0607281	1.3047	0.119	0.02	1
Cpsf7	0.0607281	1.96802	0.119	0.02	1
Lcn2	0.0608399	-2.08238	0.203	0.347	1
Taf10	0.0610327	0.759029	0.441	0.265	1
Ndufc2	0.0611532	1.0892	0.203	0.082	1
Eed	0.0615774	1.62953	0.153	0.041	1
Mrps16	0.0615774	1.42221	0.153	0.041	1
Safb2	0.0616117	-1.39443	0.119	0.245	1
Arhgap9	0.0619213	1.52361	0.254	0.122	1
Sec61a1	0.0621244	-1.79795	0.017	0.102	1
Ly6e	0.0624817	0.49153	0.814	0.714	1
Dock8	0.0627743	1.44208	0.186	0.061	1
Prdm1	0.0632301	1.99823	0.153	0.041	1
Cuta	0.0639664	1.58423	0.203	0.082	1
Sf3b5	0.0644995	1.141	0.288	0.143	1
Glipr2	0.0646806	-1.52859	0.085	0.204	1
Sec11a	0.0649193	1.51075	0.153	0.041	1
Slirp	0.0649193	1.64175	0.153	0.041	1
mt-Nd4	0.0654002	-1.14215	0.593	0.755	1
Dnajc5	0.065777	-1.46412	0.102	0.224	1
Fam174a	0.0658209	1.43325	0.186	0.061	1
Dcdc2a	0.0659052	1.57557	0.017	0	1
Cnot11	0.0659293	4.31112	0.068	0	1
Mrps9	0.0659293	4.13412	0.068	0	1
Ndufs1	0.0659293	4.79687	0.068	0	1
Rpe	0.0659293	4.32069	0.068	0	1
Pmpca	0.0659293	4.11215	0.068	0	1
Ola1	0.0659293	4.2572	0.068	0	1
Selenoh	0.0659293	4.70685	0.068	0	1
Immp1l	0.0659293	3.96604	0.068	0	1
Aqr	0.0659293	4.52002	0.068	0	1
Chac1	0.0659293	4.3862	0.068	0	1
Atrn	0.0659293	5.0987	0.068	0	1
Ralgapb	0.0659293	4.53106	0.068	0	1
Araf	0.0659293	4.67704	0.068	0	1
Fmr1	0.0659293	4.09488	0.068	0	1
Hsd17b10	0.0659293	5.25104	0.068	0	1
4932438A13Rik	0.0659293	4.03711	0.068	0	1
Fnip2	0.0659293	4.82777	0.068	0	1
Ppid	0.0659293	4.20284	0.068	0	1
Pmvk	0.0659293	4.76878	0.068	0	1
Sort1	0.0659293	4.52938	0.068	0	1
Tspan5	0.0659293	4.39299	0.068	0	1
Ift74	0.0659293	4.01867	0.068	0	1
Usp1	0.0659293	4.38474	0.068	0	1
Mxd4	0.0659293	4.01173	0.068	0	1
Brdt	0.0659293	3.97654	0.068	0	1
Ficd	0.0659293	4.40123	0.068	0	1
Pop5	0.0659293	4.05514	0.068	0	1
Psph	0.0659293	3.91206	0.068	0	1
Sh2b2	0.0659293	4.59357	0.068	0	1
Chst12	0.0659293	4.65974	0.068	0	1
Prss2	0.0659293	4.42149	0.068	0	1
Trnt1	0.0659293	4.05405	0.068	0	1
Sympk	0.0659293	4.6512	0.068	0	1
Emsy	0.0659293	4.11379	0.068	0	1
Stim1	0.0659293	4.40023	0.068	0	1
Trim34a	0.0659293	4.50514	0.068	0	1
Bccip	0.0659293	4.36779	0.068	0	1
Ebf3	0.0659293	4.34815	0.068	0	1
Tnni2	0.0659293	4.71455	0.068	0	1
Ppfia1	0.0659293	3.65623	0.068	0	1
Map7	0.0659293	4.25961	0.068	0	1
Retn	0.0659293	4.79456	0.068	0	1
Coprs	0.0659293	4.30262	0.068	0	1
Colgalt1	0.0659293	4.50671	0.068	0	1
4921524J17Rik	0.0659293	3.97052	0.068	0	1
Nudt21	0.0659293	4.05468	0.068	0	1
Rfwd3	0.0659293	4.42475	0.068	0	1
Dnajc9	0.0659293	4.40213	0.068	0	1
Samd8	0.0659293	3.95746	0.068	0	1
Mettl6	0.0659293	4.16739	0.068	0	1
Tsc22d1	0.0659293	3.70405	0.068	0	1
Stt3a	0.0659293	4.01311	0.068	0	1
Zpr1	0.0659293	4.27122	0.068	0	1
Cul5	0.0659293	4.09203	0.068	0	1
Rcn2	0.0659293	4.52211	0.068	0	1
Ccpg1os	0.0659293	3.98025	0.068	0	1
Hmgn3	0.0659293	3.59168	0.068	0	1
Ppp2r3d	0.0659293	4.40058	0.068	0	1
Ogdh	0.0659293	3.96849	0.068	0	1
Fam114a2	0.0659293	4.07634	0.068	0	1
Mfap3	0.0659293	4.11308	0.068	0	1
Srebf1	0.0659293	4.41146	0.068	0	1
Psmg4	0.0659293	4.79663	0.068	0	1
Rasa1	0.0659293	4.60475	0.068	0	1
Dnmt3a	0.0659293	4.39434	0.068	0	1
Odc1	0.0659293	4.53705	0.068	0	1
Ahr	0.0659293	4.46875	0.068	0	1
Jkamp	0.0659293	4.20865	0.068	0	1
Eif2s1	0.0659293	4.37083	0.068	0	1
6030458C11Rik	0.0659293	4.11684	0.068	0	1
Kif21a	0.0659293	3.87873	0.068	0	1
Itgb7	0.0659293	4.99613	0.068	0	1
Dgkg	0.0659293	4.68334	0.068	0	1
Nubp2	0.0659293	4.93681	0.068	0	1
Ss18	0.0659293	4.50282	0.068	0	1
Stk32a	0.0659293	4.23171	0.068	0	1
Fen1	0.0659293	3.9835	0.068	0	1
Cyp2a5	0.0659293	3.58342	0.051	0	1
Klf3	0.0661598	-0.858399	0.136	0.286	1
Gabarapl2	0.066979	0.50931	0.458	0.286	1
Timm10b	0.0678576	-0.562102	0.407	0.571	1
Gmfb	0.0696295	-2.46724	0.034	0.122	1
Hp	0.0698875	-0.395712	0.339	0.531	1
Xpr1	0.0699136	1.81342	0.203	0.082	1
Sumo1	0.0699782	-0.79186	0.271	0.449	1
Ip6k1	0.0701819	1.00673	0.22	0.082	1
Wbp1l	0.0711792	1.22266	0.254	0.122	1
Alox5	0.0714693	1.48739	0.203	0.082	1
Ptma	0.0715474	0.594717	0.712	0.531	1
Soat2	0.0717466	-2.19561	0.034	0.122	1
mt-Co1	0.0717557	-0.830093	0.746	0.857	1
Sec61b	0.0719643	0.586678	0.542	0.408	1
Gnb1	0.0719798	0.44945	0.508	0.347	1
Rock1	0.072204	-0.200961	0.153	0.306	1
Lamp1	0.07259	1.21841	0.254	0.122	1
Braf	0.0730533	1.31139	0.203	0.082	1
Ap2s1	0.0730533	1.43516	0.203	0.082	1
Mylip	0.0730533	1.17923	0.203	0.082	1
Rpl31	0.0734302	-1.16163	0.203	0.327	1
Xaf1	0.0740964	-0.873983	0.203	0.367	1
Ripor2	0.0751095	-1.33453	0.068	0.184	1
Basp1	0.0752726	-0.765202	0.356	0.531	1
Selenon	0.075432	1.9622	0.22	0.102	1
Cirbp	0.0754922	1.26797	0.339	0.224	1
Vasp	0.0755444	0.568936	0.661	0.571	1
Tpi1	0.0757966	-1.38672	0.085	0.204	1
Cox6c	0.0760215	0.809738	0.559	0.469	1
Bag1	0.0760697	0.881236	0.39	0.245	1
Sft2d1	0.0763073	1.34869	0.203	0.082	1
Rbm7	0.0774574	1.22121	0.186	0.061	1
Isg20	0.077833	-0.644507	0.475	0.694	1
Ndufb4	0.0782163	0.784327	0.322	0.163	1
Strbp	0.0782375	2.56145	0.136	0.041	1
Gca	0.0782375	2.44438	0.136	0.041	1
Pam16	0.0782375	2.46267	0.136	0.041	1
Casp8	0.078416	-1.97961	0.034	0.122	1
Cul1	0.078416	-1.96353	0.034	0.122	1
Emc7	0.0786091	1.38795	0.22	0.102	1
Rbbp6	0.0787548	1.70242	0.169	0.061	1
Slc6a6	0.0787818	-0.871898	0.288	0.429	1
Cnih4	0.07893	1.01013	0.305	0.163	1
Ddx6	0.0798556	-0.852505	0.339	0.469	1
Micos13	0.079991	1.17107	0.254	0.122	1
Scand1	0.0801446	0.523292	0.61	0.469	1
Hsbp1	0.080147	-0.860834	0.153	0.286	1
Arpp19	0.0802741	0.587953	0.627	0.531	1
Paip2	0.080343	1.12869	0.305	0.163	1
Ltb	0.0803481	-0.275254	0.407	0.592	1
Smpdl3a	0.0806307	-0.650913	0.068	0.184	1
Uqcrc2	0.0806307	1.91757	0.169	0.061	1
Vsir	0.0806464	1.10191	0.288	0.143	1
Xrn1	0.0807482	-1.79397	0.034	0.122	1
Snap23	0.081033	-0.491409	0.339	0.551	1
Spop	0.0817066	0.503686	0.271	0.122	1
Pnrc1	0.0821062	-0.510663	0.678	0.796	1
Dnajc8	0.0821285	0.921813	0.288	0.143	1
Rdx	0.0824822	1.84456	0.136	0.041	1
Gosr2	0.0825428	-1.26581	0.068	0.184	1
Mettl23	0.0825428	1.87239	0.169	0.061	1
Nr4a1	0.0825466	1.06157	0.424	0.265	1
Rpl8	0.0826556	0.546389	0.661	0.592	1
Atp5j2	0.0826676	1.04896	0.356	0.224	1
Ugcg	0.0827043	3.16102	0.102	0.02	1
Gatad1	0.0827043	2.85355	0.102	0.02	1
Zc3h13	0.0827043	3.02887	0.102	0.02	1
Smarcd2	0.0827043	2.89336	0.102	0.02	1
Rnps1	0.0827043	2.64608	0.102	0.02	1
Vps52	0.0827043	2.45851	0.102	0.02	1
Cd274	0.0827043	2.8801	0.102	0.02	1
Ell2	0.0828189	-1.18839	0.085	0.204	1
Sf3b1	0.0829485	0.796688	0.492	0.347	1
Srsf3	0.0831181	1.18166	0.254	0.122	1
Was	0.0835721	-1.71887	0.051	0.143	1
Cdc42se1	0.0838925	1.19045	0.288	0.163	1
Sys1	0.0840298	0.948786	0.356	0.224	1
Tmsb10	0.0847176	0.853602	0.373	0.204	1
Taf7	0.0852897	1.54194	0.22	0.102	1
Acbd3	0.0852969	2.49303	0.102	0.02	1
Sf3a3	0.0852969	2.44809	0.102	0.02	1
Malsu1	0.0852969	2.72274	0.102	0.02	1
Klra2	0.0852969	2.54098	0.102	0.02	1
Cdk17	0.0852969	2.69261	0.102	0.02	1
Ing1	0.0852969	2.82486	0.102	0.02	1
Banp	0.0852969	2.71347	0.102	0.02	1
Mcrip1	0.0852969	2.37951	0.102	0.02	1
Ermp1	0.0852969	2.57449	0.102	0.02	1
Ndufb3	0.0853784	0.974729	0.237	0.102	1
Ier2	0.0863216	-0.435704	0.424	0.612	1
Hmgb2	0.0863216	0.934834	0.559	0.449	1
Larp4b	0.0865229	2.09824	0.186	0.082	1
Uqcr11	0.0868086	0.682844	0.356	0.224	1
Zzz3	0.0869117	1.8203	0.136	0.041	1
Cisd2	0.0870297	1.41841	0.22	0.102	1
Ndufa4	0.0876025	0.8751	0.424	0.286	1
Vbp1	0.0879548	2.27383	0.102	0.02	1
Cd72	0.0879548	3.38787	0.102	0.02	1
Rps6ka1	0.0879548	2.44225	0.102	0.02	1
Dnajc2	0.0879548	2.17886	0.102	0.02	1
Hadhb	0.0879548	2.30861	0.102	0.02	1
Lias	0.0879548	2.3211	0.102	0.02	1
Ciao2a	0.0879548	2.2841	0.102	0.02	1
Pitpnc1	0.0879548	2.65667	0.102	0.02	1
H2-M10.5	0.0879548	3.00846	0.085	0.02	1
Ndufs6	0.0879938	1.1964	0.254	0.122	1
Rhoc	0.0880844	-1.63394	0.034	0.122	1
Ufd1	0.0885003	1.62074	0.169	0.061	1
Rplp2	0.0890366	0.455168	0.678	0.612	1
Bud31	0.0891975	1.84373	0.136	0.041	1
Mrpl58	0.0891975	1.69819	0.136	0.041	1
Sqstm1	0.0894862	1.11728	0.271	0.143	1
Mrpl20	0.0896694	1.10099	0.254	0.122	1
Jaml	0.0905245	0.94623	0.203	0.082	1
Upp1	0.0905615	-0.433045	0.068	0.184	1
Mia2	0.0905696	-1.21075	0.119	0.245	1
Cnot3	0.0906791	2.24138	0.102	0.02	1
Dync1li1	0.0906791	2.06947	0.102	0.02	1
Lipa	0.0906791	2.07109	0.102	0.02	1
Btg1	0.090774	-0.261121	0.881	0.959	1
Hnrnpu	0.0922082	1.71705	0.254	0.143	1
9930111J21Rik2	0.0923553	-0.498985	0.119	0.245	1
Zc3hav1	0.0927873	-0.993359	0.153	0.286	1
Cers2	0.0932671	-1.65586	0.034	0.122	1
Fcgr1	0.0932671	-1.23414	0.034	0.122	1
Miip	0.0934709	2.14638	0.102	0.02	1
Parp12	0.0934709	2.27677	0.102	0.02	1
Upf1	0.0934709	1.8066	0.102	0.02	1
Ntpcr	0.0934709	2.25567	0.102	0.02	1
Gpd1l	0.0934709	2.13037	0.102	0.02	1
Sp2	0.0934709	1.97958	0.102	0.02	1
Actr3	0.0936266	-0.593922	0.339	0.551	1
Stx16	0.0939141	1.74899	0.136	0.041	1
Pithd1	0.0939141	0.991606	0.136	0.041	1
Lasp1	0.0939141	1.61359	0.136	0.041	1
Ifit3b	0.0939773	-0.789295	0.407	0.531	1
Sec61g	0.0941217	0.796601	0.424	0.306	1
Irak2	0.0943318	1.58452	0.186	0.082	1
Tsc22d3	0.0944741	1.68312	0.271	0.143	1
Plp2	0.0946583	-1.51573	0.136	0.245	1
Trappc2l	0.0947997	1.39573	0.169	0.061	1
Map4k2	0.0947997	1.32719	0.169	0.061	1
Scp2	0.0949032	1.02756	0.288	0.163	1
Trim26	0.0951239	-1.72873	0.051	0.143	1
Abhd5	0.0959488	-1.04844	0.034	0.122	1
Pgam1	0.0959835	-0.927311	0.237	0.388	1
BC005537	0.0960117	0.829068	0.237	0.102	1
Acadl	0.0963313	2.05588	0.102	0.02	1
Bola1	0.0963313	1.74087	0.102	0.02	1
Sf3a2	0.0963313	1.65874	0.102	0.02	1
Nrn1l	0.0963313	1.4222	0.102	0.02	1
Trak1	0.0963313	1.72933	0.102	0.02	1
Foxn3	0.0963313	1.92251	0.102	0.02	1
Kdm3b	0.0963313	1.87561	0.102	0.02	1
Rnf114	0.0964701	1.37777	0.237	0.122	1
Sh3bgrl3	0.0967652	0.393465	0.847	0.816	1
Fam104a	0.0968856	-0.690917	0.271	0.449	1
Cyb5r1	0.0969776	0.946202	0.169	0.061	1
Smarca5	0.0969776	1.35064	0.169	0.061	1
Purb	0.0974079	1.25428	0.254	0.143	1
Slc25a20	0.0975811	-1.54725	0.051	0.143	1
Ndel1	0.097674	-0.750866	0.305	0.449	1
Ptprc	0.0977929	0.29154	0.864	0.694	1
Ifit1	0.0978017	-0.690781	0.525	0.612	1
Mapkapk2	0.0978829	-1.05238	0.119	0.245	1
Nr3c1	0.0979301	-0.994364	0.102	0.224	1
Rpl3	0.0981958	0.710105	0.288	0.143	1
Znhit1	0.0982968	-0.714405	0.136	0.286	1
Tomm7	0.098783	0.578535	0.61	0.49	1
Tbc1d20	0.0988286	1.55896	0.136	0.041	1
Samm50	0.0988286	0.995922	0.136	0.041	1
Zfp451	0.0992612	1.15999	0.102	0.02	1
Ivns1abp	0.0992612	0.918037	0.102	0.02	1
Ggh	0.0992612	1.49349	0.102	0.02	1
Zyg11b	0.0992612	1.55296	0.102	0.02	1
Tdg	0.0992612	1.50814	0.102	0.02	1
Tspan3	0.0992612	1.73688	0.102	0.02	1
Psmd3	0.0992612	1.79239	0.102	0.02	1
Nckap1l	0.0992612	1.76365	0.102	0.02	1
Phf1	0.0992612	1.73639	0.102	0.02	1
H2aj	0.0993064	0.161583	0.61	0.449	1
Casp4	0.099835	-1.87421	0.068	0.163	1
Rps23	0.100088	0.253889	0.746	0.571	1
Anxa7	0.100089	-1.54182	0.051	0.143	1
Mrpl32	0.100089	-1.2721	0.051	0.143	1
Arf6	0.100094	0.828412	0.271	0.122	1
Gbp7	0.100551	-1.00945	0.085	0.204	1
Phip	0.100551	-0.662756	0.085	0.204	1
Mrps21	0.101556	0.853619	0.339	0.184	1
Klhl24	0.101944	2.01284	0.203	0.102	1
Ltc4s	0.102003	1.37011	0.22	0.102	1
Ifnar1	0.102648	-1.51778	0.051	0.143	1
Emc6	0.102696	1.53939	0.186	0.082	1
Hcar2	0.103264	-0.810307	0.288	0.449	1
Abcg1	0.103672	0.765311	0.237	0.102	1
Ndufs3	0.103946	1.19885	0.136	0.041	1
Psmd4	0.103999	1.36752	0.203	0.102	1
Cmpk2	0.104017	-1.01234	0.136	0.265	1
Cstdc4	0.105258	-1.5059	0.051	0.143	1
Hectd1	0.105394	0.556835	0.373	0.224	1
Prex1	0.105949	1.15637	0.237	0.122	1
Pdcd6	0.105949	1.10744	0.237	0.122	1
Anapc11	0.106092	0.932574	0.169	0.061	1
Fkbp3	0.106583	1.55173	0.136	0.041	1
Apoe	0.106592	1.60147	0.254	0.143	1
Chd7	0.107032	-0.417975	0.237	0.388	1
Gorasp2	0.107369	-3.12442	0.017	0.082	1
Zfx	0.107369	-2.73361	0.017	0.082	1
Pum1	0.107369	-3.36399	0.017	0.082	1
Eif3d	0.107369	-2.96663	0.017	0.082	1
Arid2	0.107369	-2.75067	0.017	0.082	1
Rpl3l	0.107369	-2.36756	0.017	0.082	1
Mad2l1bp	0.107369	-3.03064	0.017	0.082	1
Ganab	0.107369	-3.50335	0.017	0.082	1
Ppp1r15b	0.107921	-1.3948	0.051	0.143	1
Ubap2l	0.107931	1.21366	0.237	0.122	1
Ndst1	0.10812	1.1223	0.22	0.102	1
Herpud1	0.108259	1.95001	0.153	0.061	1
Nlrp3	0.108977	-0.409526	0.288	0.469	1
Gng5	0.109738	-0.380646	0.831	0.959	1
Laptm4a	0.109845	0.828144	0.254	0.122	1
Ppp1r11	0.109845	0.487247	0.254	0.122	1
Rsrc2	0.110223	0.780308	0.22	0.102	1
Pstpip1	0.110367	-0.660481	0.237	0.388	1
Macroh2a1	0.110453	1.05325	0.254	0.143	1
Errfi1	0.111119	-2.60704	0.017	0.082	1
Vmn2r36	0.111119	-2.15799	0.017	0.082	1
Ceacam1	0.111119	-3.0061	0.017	0.082	1
H2az1	0.111417	0.860371	0.492	0.408	1
Rps15a	0.111792	0.906228	0.627	0.592	1
Gbp2	0.111809	-0.562041	0.119	0.245	1
Cox6b1	0.111901	0.593328	0.61	0.449	1
Tfeb	0.112037	-1.39925	0.068	0.163	1
Hnrnpab	0.112357	1.13075	0.22	0.102	1
Eif4h	0.11332	2.00216	0.153	0.061	1
Bcl2a1b	0.113404	0.668161	0.559	0.408	1
Ube2r2	0.113407	-1.12885	0.051	0.143	1
Tgfbrap1	0.11356	4.79762	0.051	0	1
Rnf25	0.11356	3.99644	0.051	0	1
Pigc	0.11356	4.04899	0.051	0	1
Fcgr2b	0.11356	4.02904	0.051	0	1
Alyref2	0.11356	4.10425	0.051	0	1
Fmn2	0.11356	3.50133	0.051	0	1
Scn3a	0.11356	4.22332	0.051	0	1
Slc39a13	0.11356	4.30957	0.051	0	1
1110051M20Rik	0.11356	3.83843	0.051	0	1
Hsd17b12	0.11356	3.6812	0.051	0	1
Dnajc24	0.11356	4.13573	0.051	0	1
Scg5	0.11356	2.88624	0.051	0	1
Vps18	0.11356	4.07939	0.051	0	1
Vps39	0.11356	4.39405	0.051	0	1
Ctdspl2	0.11356	4.00627	0.051	0	1
Mrps5	0.11356	4.16233	0.051	0	1
Sec23b	0.11356	3.63223	0.051	0	1
Trp53inp2	0.11356	4.34305	0.051	0	1
Ift52	0.11356	3.88462	0.051	0	1
Stau1	0.11356	4.11728	0.051	0	1
Cstf1	0.11356	3.86697	0.051	0	1
Zgpat	0.11356	4.16517	0.051	0	1
Polr3k	0.11356	3.42598	0.051	0	1
Slc35a2	0.11356	4.01121	0.051	0	1
Cask	0.11356	3.97705	0.051	0	1
Gpc3	0.11356	3.96067	0.051	0	1
Armcx1	0.11356	3.9296	0.051	0	1
Armcx3	0.11356	3.83881	0.051	0	1
Map3k15	0.11356	3.97042	0.051	0	1
Kcnmb2	0.11356	4.10544	0.051	0	1
Proser1	0.11356	3.74849	0.051	0	1
Vmn2r7	0.11356	3.9123	0.051	0	1
Ubqln4	0.11356	3.39298	0.051	0	1
Mtx1	0.11356	3.45778	0.051	0	1
Otud7b	0.11356	3.85109	0.051	0	1
Chd1l	0.11356	3.84721	0.051	0	1
Cept1	0.11356	3.6099	0.051	0	1
Larp7	0.11356	3.77306	0.051	0	1
Tbck	0.11356	4.03794	0.051	0	1
Trmt10a	0.11356	3.9394	0.051	0	1
Wwp1	0.11356	3.998	0.051	0	1
Orc3	0.11356	3.69748	0.051	0	1
Nfx1	0.11356	4.01471	0.051	0	1
Ncbp1	0.11356	4.03935	0.051	0	1
Frmd3	0.11356	3.18077	0.051	0	1
Plaa	0.11356	3.71548	0.051	0	1
Pgm1	0.11356	4.36425	0.051	0	1
Ipo13	0.11356	3.42287	0.051	0	1
Ppie	0.11356	3.99239	0.051	0	1
Inpp5b	0.11356	3.8955	0.051	0	1
Oscp1	0.11356	4.19741	0.051	0	1
Sfn	0.11356	3.12432	0.051	0	1
Gale	0.11356	3.94472	0.051	0	1
A430005L14Rik	0.11356	3.97114	0.051	0	1
Faap20	0.11356	4.11525	0.051	0	1
Ints11	0.11356	4.10954	0.051	0	1
Agap3	0.11356	4.14705	0.051	0	1
Cenpa	0.11356	4.0434	0.051	0	1
Eif2b4	0.11356	3.68278	0.051	0	1
Prr14l	0.11356	4.23648	0.051	0	1
Acox3	0.11356	3.79614	0.051	0	1
Sdad1	0.11356	3.74869	0.051	0	1
Idua	0.11356	3.9175	0.051	0	1
Hip1r	0.11356	3.67856	0.051	0	1
Ogfod2	0.11356	3.8943	0.051	0	1
Mepce	0.11356	3.75885	0.051	0	1
Dync1i1	0.11356	3.94886	0.051	0	1
C1galt1	0.11356	4.31302	0.051	0	1
Tmem168	0.11356	4.54269	0.051	0	1
Pot1a	0.11356	3.94861	0.051	0	1
Zfp800	0.11356	4.31861	0.051	0	1
Smarcad1	0.11356	3.88508	0.051	0	1
Mrpl19	0.11356	3.48803	0.051	0	1
Tmem43	0.11356	4.24177	0.051	0	1
Eif4e3	0.11356	4.08673	0.051	0	1
Ttll3	0.11356	4.14626	0.051	0	1
Atp2b2	0.11356	3.24731	0.051	0	1
Tapbpl	0.11356	3.94183	0.051	0	1
Magohb	0.11356	4.3852	0.051	0	1
Prpf31	0.11356	3.52241	0.051	0	1
Blvrb	0.11356	4.29784	0.051	0	1
Zdhhc13	0.11356	3.62116	0.051	0	1
Tm2d3	0.11356	3.46317	0.051	0	1
Aamdc	0.11356	4.14269	0.051	0	1
Numa1	0.11356	4.20625	0.051	0	1
Itpripl2	0.11356	4.41403	0.051	0	1
Nfatc2ip	0.11356	3.84573	0.051	0	1
Cd2bp2	0.11356	4.11918	0.051	0	1
Tbc1d10b	0.11356	3.96653	0.051	0	1
Tial1	0.11356	3.53502	0.051	0	1
Plekha1	0.11356	4.41523	0.051	0	1
Mapk1ip1	0.11356	3.98386	0.051	0	1
Pde7b	0.11356	3.94648	0.051	0	1
Epb41l2	0.11356	4.18061	0.051	0	1
Tcf3	0.11356	3.77408	0.051	0	1
Rtcb	0.11356	4.09028	0.051	0	1
Mon2	0.11356	4.09955	0.051	0	1
Zbtb39	0.11356	4.26958	0.051	0	1
Col4a2	0.11356	3.6515	0.051	0	1
Fnta	0.11356	4.02935	0.051	0	1
Hpf1	0.11356	3.83183	0.051	0	1
Otud4	0.11356	4.11448	0.051	0	1
Wdr83	0.11356	3.85543	0.051	0	1
Vps35	0.11356	3.91603	0.051	0	1
Mt2	0.11356	4.19504	0.051	0	1
Csnk2a2	0.11356	4.25939	0.051	0	1
Zfp1	0.11356	4.63876	0.051	0	1
Cfdp1	0.11356	4.21092	0.051	0	1
Kars	0.11356	4.03491	0.051	0	1
Ctu2	0.11356	3.85566	0.051	0	1
Rbm34	0.11356	3.99301	0.051	0	1
Shld2	0.11356	3.6205	0.051	0	1
Naa30	0.11356	4.2646	0.051	0	1
Vmn2r88	0.11356	3.748	0.051	0	1
Dhrs1	0.11356	4.28434	0.051	0	1
Nop9	0.11356	3.99372	0.051	0	1
Adamdec1	0.11356	4.72333	0.051	0	1
Xpo7	0.11356	3.91865	0.051	0	1
Jrkl	0.11356	3.87398	0.051	0	1
Zfp560	0.11356	3.86354	0.051	0	1
Zfp809	0.11356	3.72942	0.051	0	1
Ets1	0.11356	3.81216	0.051	0	1
Tmem218	0.11356	3.52252	0.051	0	1
Ift46	0.11356	3.55621	0.051	0	1
Mpzl3	0.11356	3.95201	0.051	0	1
Idh3a	0.11356	3.45976	0.051	0	1
Clpx	0.11356	3.89826	0.051	0	1
Polr2m	0.11356	3.76838	0.051	0	1
Slc25a36	0.11356	4.4775	0.051	0	1
Bsn	0.11356	3.39315	0.051	0	1
Prkar2a	0.11356	3.5752	0.051	0	1
Ano10	0.11356	3.71192	0.051	0	1
Bcl11a	0.11356	3.21925	0.051	0	1
Bod1	0.11356	3.52936	0.051	0	1
Ccnjl	0.11356	3.96208	0.051	0	1
Mprip	0.11356	3.78982	0.051	0	1
Dhrs7b	0.11356	3.73404	0.051	0	1
Tmem11	0.11356	3.26645	0.051	0	1
Pik3r6	0.11356	3.98572	0.051	0	1
0610010K14Rik	0.11356	4.58927	0.051	0	1
Rabep1	0.11356	3.59839	0.051	0	1
Atp2a3	0.11356	4.24675	0.051	0	1
Timm22	0.11356	4.08846	0.051	0	1
Blmh	0.11356	3.81591	0.051	0	1
2610507B11Rik	0.11356	3.81166	0.051	0	1
Pnpo	0.11356	4.06865	0.051	0	1
Rundc1	0.11356	4.44111	0.051	0	1
Plekhm1	0.11356	4.55173	0.051	0	1
Tlk2	0.11356	3.78313	0.051	0	1
Chrm3	0.11356	4.09828	0.051	0	1
Eci2	0.11356	4.02194	0.051	0	1
Cdyl	0.11356	3.72867	0.051	0	1
Cltb	0.11356	3.68125	0.051	0	1
Rfesd	0.11356	4.08632	0.051	0	1
Zfp131	0.11356	3.92191	0.051	0	1
Fam49a	0.11356	4.44511	0.051	0	1
Srp54a	0.11356	4.32647	0.051	0	1
Ppp2r3c	0.11356	3.68231	0.051	0	1
Rdh11	0.11356	3.85987	0.051	0	1
Vipas39	0.11356	4.16988	0.051	0	1
Atg2b	0.11356	3.4527	0.051	0	1
Apopt1	0.11356	3.90247	0.051	0	1
Jag2	0.11356	4.12708	0.051	0	1
Zfr	0.11356	3.9534	0.051	0	1
Fam91a1	0.11356	4.08016	0.051	0	1
Kcnq3	0.11356	3.82532	0.051	0	1
Fbxl6	0.11356	3.58959	0.051	0	1
Slc39a4	0.11356	4.20722	0.051	0	1
Parvg	0.11356	3.90414	0.051	0	1
Ddx23	0.11356	3.44811	0.051	0	1
Slc4a8	0.11356	3.22697	0.051	0	1
Dgcr6	0.11356	3.92219	0.051	0	1
Tmem181a	0.11356	3.56381	0.051	0	1
Rps6ka2	0.11356	3.94249	0.051	0	1
1600012H06Rik	0.11356	3.82065	0.051	0	1
Spsb3	0.11356	3.78418	0.051	0	1
Zfp523	0.11356	3.39307	0.051	0	1
Agpat1	0.11356	4.43016	0.051	0	1
Vars	0.11356	4.1205	0.051	0	1
D17H6S53E	0.11356	4.18169	0.051	0	1
Slc29a1	0.11356	3.9503	0.051	0	1
Rsph9	0.11356	4.02274	0.051	0	1
2310039H08Rik	0.11356	3.94984	0.051	0	1
Clpp	0.11356	3.46792	0.051	0	1
Gpr108	0.11356	3.6313	0.051	0	1
Fbxl17	0.11356	4.10482	0.051	0	1
Slc30a6	0.11356	3.83974	0.051	0	1
Strn	0.11356	4.63935	0.051	0	1
Ccny	0.11356	4.69126	0.051	0	1
Usp14	0.11356	4.13091	0.051	0	1
Tpgs2	0.11356	3.73465	0.051	0	1
Hdac3	0.11356	4.31377	0.051	0	1
Me2	0.11356	3.61756	0.051	0	1
Rce1	0.11356	3.49769	0.051	0	1
Flrt1	0.11356	3.38387	0.051	0	1
Abhd17b	0.11356	4.22001	0.051	0	1
Cemip2	0.11356	4.39999	0.051	0	1
Stambpl1	0.11356	3.98399	0.051	0	1
Cpn1	0.11356	3.55234	0.051	0	1
Slf2	0.11356	3.8573	0.051	0	1
Fbxw4	0.11356	4.75746	0.051	0	1
Cacul1	0.11356	4.24819	0.051	0	1
C1qtnf4	0.11356	3.6791	0.034	0	1
Cntnap2	0.11356	2.92728	0.034	0	1
Vmn1r35	0.11356	2.77867	0.034	0	1
Pgp	0.113969	1.41021	0.186	0.082	1
Ppp2r5a	0.114524	-1.14327	0.119	0.224	1
Mpc1	0.114757	0.999662	0.373	0.245	1
Sap30	0.114774	1.69902	0.203	0.102	1
Atp7a	0.114972	-2.20247	0.017	0.082	1
Ubap1	0.114972	-2.9101	0.017	0.082	1
Zfp68	0.114972	-2.20277	0.017	0.082	1
Uspl1	0.114972	-2.23905	0.017	0.082	1
Metap2	0.114972	-2.21968	0.017	0.082	1
Ap3b1	0.114972	-2.2259	0.017	0.082	1
Hhex	0.114972	-2.28481	0.017	0.082	1
Mrpl30	0.115261	0.633532	0.339	0.204	1
Arl6ip1	0.115439	0.635707	0.39	0.265	1
Lamp2	0.115462	-0.34679	0.322	0.51	1
AB124611	0.115469	-0.85781	0.22	0.327	1
Srsf5	0.115513	0.391144	0.627	0.51	1
Prr14	0.116231	-1.10227	0.051	0.143	1
Lrrc25	0.116565	-0.533528	0.356	0.51	1
Acod1	0.116877	-0.378526	0.441	0.612	1
C1d	0.117236	-1.33626	0.068	0.163	1
Fus	0.11804	-0.723041	0.305	0.469	1
Cdk9	0.118282	1.17944	0.237	0.122	1
Gdi1	0.118565	1.8869	0.153	0.061	1
Pgls	0.118565	1.96939	0.153	0.061	1
Ncoa2	0.118929	-1.65331	0.017	0.082	1
Pam	0.118929	-1.5181	0.017	0.082	1
Rab22a	0.118929	-1.79581	0.017	0.082	1
Mtm1	0.118929	-1.72745	0.017	0.082	1
Pi4k2b	0.118929	-1.7561	0.017	0.082	1
Kbtbd7	0.118929	-2.11898	0.017	0.082	1
Ubl7	0.118929	-1.98095	0.017	0.082	1
Spag7	0.118929	-2.05299	0.017	0.082	1
Nmt1	0.118929	-1.93989	0.017	0.082	1
Chkb	0.118929	-1.96374	0.017	0.082	1
Dgkz	0.119323	-0.327524	0.102	0.224	1
Mpp7	0.119323	1.61287	0.203	0.102	1
Zdhhc18	0.12013	-1.04997	0.136	0.265	1
Mknk2	0.120443	1.08262	0.237	0.122	1
Ifih1	0.120588	1.45731	0.254	0.143	1
Ccndbp1	0.121258	1.72448	0.153	0.061	1
Ddx50	0.121258	1.52375	0.153	0.061	1
Arpc2	0.121453	-0.325415	0.661	0.857	1
2010300C02Rik	0.122141	-3.03352	0	0.041	1
Maip1	0.122141	-4.11143	0	0.041	1
Kctd18	0.122141	-4.09716	0	0.041	1
Yod1	0.122141	-5.00927	0	0.041	1
Ppox	0.122141	-3.6083	0	0.041	1
Cd48	0.122141	-3.76611	0	0.041	1
Nhlh1	0.122141	-3.22397	0	0.041	1
Ifi214	0.122141	-3.71428	0	0.041	1
Trdmt1	0.122141	-4.00854	0	0.041	1
Thnsl1	0.122141	-3.60183	0	0.041	1
Phpt1	0.122141	-3.34774	0	0.041	1
Gtf3c4	0.122141	-3.74092	0	0.041	1
Psmd5	0.122141	-4.35815	0	0.041	1
Scai	0.122141	-4.27916	0	0.041	1
Kif5c	0.122141	-4.50939	0	0.041	1
Fap	0.122141	-4.24308	0	0.041	1
Zdhhc5	0.122141	-4.01324	0	0.041	1
Ambra1	0.122141	-3.81018	0	0.041	1
Ankrd63	0.122141	-2.61729	0	0.041	1
Secisbp2l	0.122141	-3.69668	0	0.041	1
Mcts2	0.122141	-3.47887	0	0.041	1
Tti1	0.122141	-4.16676	0	0.041	1
Slc32a1	0.122141	-3.90155	0	0.041	1
Prickle3	0.122141	-3.71608	0	0.041	1
Rhox8	0.122141	-4.09915	0	0.041	1
Tmem185a	0.122141	-3.76803	0	0.041	1
Stard8	0.122141	-4.26839	0	0.041	1
Nceh1	0.122141	-3.14159	0	0.041	1
Rusc1	0.122141	-4.10906	0	0.041	1
Rab13	0.122141	-4.04456	0	0.041	1
Ints3	0.122141	-4.29999	0	0.041	1
S100a5	0.122141	-2.90382	0	0.041	1
Pex11b	0.122141	-4.27926	0	0.041	1
Rbm15	0.122141	-4.24943	0	0.041	1
Wdr47	0.122141	-4.45329	0	0.041	1
F3	0.122141	-4.12124	0	0.041	1
Usp33	0.122141	-3.67149	0	0.041	1
Zfp462	0.122141	-4.0885	0	0.041	1
Coa7	0.122141	-3.34223	0	0.041	1
Pdzk1ip1	0.122141	-4.00118	0	0.041	1
Ifnlr1	0.122141	-3.18835	0	0.041	1
Emc1	0.122141	-3.59721	0	0.041	1
Casp9	0.122141	-3.88482	0	0.041	1
Kazn	0.122141	-4.05356	0	0.041	1
Mad2l2	0.122141	-3.73836	0	0.041	1
Camta1	0.122141	-3.04173	0	0.041	1
Tec	0.122141	-3.99261	0	0.041	1
Igfbp7	0.122141	-3.622	0	0.041	1
Uba6	0.122141	-4.57825	0	0.041	1
Sec31a	0.122141	-4.28257	0	0.041	1
Btbd8	0.122141	-3.58712	0	0.041	1
Golga3	0.122141	-4.24888	0	0.041	1
Micall2	0.122141	-4.22839	0	0.041	1
Olfr460	0.122141	-4.06971	0	0.041	1
Casp2	0.122141	-4.05454	0	0.041	1
Zfp212	0.122141	-3.75478	0	0.041	1
Tmem176b	0.122141	-3.7126	0	0.041	1
Vmn1r27	0.122141	-3.12	0	0.041	1
Kdm3a	0.122141	-4.47285	0	0.041	1
Pcyox1	0.122141	-3.36635	0	0.041	1
Gmcl1	0.122141	-4.08216	0	0.041	1
H1f10	0.122141	-3.71673	0	0.041	1
Cfap100	0.122141	-3.95058	0	0.041	1
Uba3	0.122141	-4.25363	0	0.041	1
Vhl	0.122141	-4.26144	0	0.041	1
Bicra	0.122141	-3.22832	0	0.041	1
Arhgap35	0.122141	-3.90314	0	0.041	1
Slc1a5	0.122141	-4.35851	0	0.041	1
Zfp574	0.122141	-3.64903	0	0.041	1
Zfp60	0.122141	-3.50491	0	0.041	1
Sipa1l3	0.122141	-4.51759	0	0.041	1
Kmt2b	0.122141	-3.82402	0	0.041	1
Ap2a1	0.122141	-4.05619	0	0.041	1
Arrb1	0.122141	-4.15028	0	0.041	1
Clpb	0.122141	-3.95389	0	0.041	1
Sh2b1	0.122141	-3.73791	0	0.041	1
Sec23ip	0.122141	-4.23241	0	0.041	1
Dmbt1	0.122141	-2.20439	0	0.041	1
Cd151	0.122141	-3.4546	0	0.041	1
Reps1	0.122141	-3.63061	0	0.041	1
L3mbtl3	0.122141	-4.3672	0	0.041	1
Sec63	0.122141	-3.76872	0	0.041	1
Pcdh15	0.122141	-3.73031	0	0.041	1
Gatd3a	0.122141	-5.18304	0	0.041	1
Apba3	0.122141	-4.20767	0	0.041	1
Prdm4	0.122141	-3.96007	0	0.041	1
Nt5dc3	0.122141	-4.09895	0	0.041	1
Rnf41	0.122141	-3.86715	0	0.041	1
Timm44	0.122141	-3.45634	0	0.041	1
Arhgef7	0.122141	-5.03559	0	0.041	1
Ddhd2	0.122141	-3.97022	0	0.041	1
Brf2	0.122141	-3.63794	0	0.041	1
Dusp26	0.122141	-3.86739	0	0.041	1
Tti2	0.122141	-3.9331	0	0.041	1
Map1s	0.122141	-3.9114	0	0.041	1
Arhgap10	0.122141	-3.42659	0	0.041	1
Smad1	0.122141	-3.5785	0	0.041	1
Rspry1	0.122141	-3.92279	0	0.041	1
Atmin	0.122141	-3.52277	0	0.041	1
Pgbd5	0.122141	-3.59166	0	0.041	1
Oxnad1	0.122141	-4.00658	0	0.041	1
Sftpd	0.122141	-3.95673	0	0.041	1
Supt16	0.122141	-4.31445	0	0.041	1
Rab2b	0.122141	-4.52584	0	0.041	1
Tinf2	0.122141	-4.06228	0	0.041	1
Ebpl	0.122141	-3.35249	0	0.041	1
Dok2	0.122141	-3.28955	0	0.041	1
Rb1	0.122141	-3.58843	0	0.041	1
Uggt2	0.122141	-3.49432	0	0.041	1
Jam3	0.122141	-4.11775	0	0.041	1
Dcps	0.122141	-3.93676	0	0.041	1
Cadm1	0.122141	-4.20987	0	0.041	1
Smad3	0.122141	-3.41307	0	0.041	1
Nudt16	0.122141	-4.01681	0	0.041	1
Atp2c1	0.122141	-3.69667	0	0.041	1
Abhd14a	0.122141	-5.0588	0	0.041	1
Rnf123	0.122141	-4.40038	0	0.041	1
Mapk9	0.122141	-4.10238	0	0.041	1
Plscr3	0.122141	-3.79042	0	0.041	1
Tlcd2	0.122141	-3.9747	0	0.041	1
Xylt2	0.122141	-3.84978	0	0.041	1
Scrn2	0.122141	-3.79836	0	0.041	1
Ormdl3	0.122141	-3.7473	0	0.041	1
Atxn7l3	0.122141	-3.6252	0	0.041	1
Mapt	0.122141	-4.1748	0	0.041	1
Cep95	0.122141	-4.17218	0	0.041	1
Cdc42ep4	0.122141	-4.7716	0	0.041	1
Cep131	0.122141	-3.65621	0	0.041	1
Rfng	0.122141	-4.10687	0	0.041	1
Exoc2	0.122141	-3.89799	0	0.041	1
Faf2	0.122141	-3.71147	0	0.041	1
Rgs14	0.122141	-4.16853	0	0.041	1
Zfp738	0.122141	-3.43368	0	0.041	1
Cbll1	0.122141	-4.13893	0	0.041	1
Scfd1	0.122141	-3.62889	0	0.041	1
Klhl28	0.122141	-4.14668	0	0.041	1
Sav1	0.122141	-3.88545	0	0.041	1
Sgpp1	0.122141	-4.16962	0	0.041	1
Map3k9	0.122141	-4.17969	0	0.041	1
Galc	0.122141	-4.0605	0	0.041	1
Nrde2	0.122141	-4.15829	0	0.041	1
Dicer1	0.122141	-3.74358	0	0.041	1
Cplane1	0.122141	-3.29782	0	0.041	1
Ropn1l	0.122141	-3.73311	0	0.041	1
Ly6h	0.122141	-4.80774	0	0.041	1
Sharpin	0.122141	-4.0408	0	0.041	1
Arfgap3	0.122141	-3.54382	0	0.041	1
Fkbp11	0.122141	-3.98963	0	0.041	1
Parn	0.122141	-4.12366	0	0.041	1
Hspa13	0.122141	-3.32164	0	0.041	1
Gart	0.122141	-3.95683	0	0.041	1
Prdm15	0.122141	-4.17364	0	0.041	1
Zfp51	0.122141	-4.25563	0	0.041	1
Zfp598	0.122141	-3.68167	0	0.041	1
Mapk8ip3	0.122141	-3.60351	0	0.041	1
Ddah2	0.122141	-3.34543	0	0.041	1
Aif1	0.122141	-3.84488	0	0.041	1
Rrp36	0.122141	-3.94423	0	0.041	1
Plin3	0.122141	-3.77452	0	0.041	1
Tnfsf9	0.122141	-4.62133	0	0.041	1
Wdr43	0.122141	-4.22469	0	0.041	1
Prkd3	0.122141	-3.72716	0	0.041	1
Morn2	0.122141	-4.22615	0	0.041	1
Spata24	0.122141	-4.05138	0	0.041	1
B3gat3	0.122141	-4.14755	0	0.041	1
Ms4a6c	0.122141	-3.87274	0	0.041	1
Hpse2	0.122141	-3.47407	0	0.041	1
Nfkb2	0.122141	-4.36742	0	0.041	1
Fam45a	0.122141	-4.05842	0	0.041	1
Vmn2r121	0.122141	-2.39231	0	0.02	1
Vmn1r75	0.122141	-1.48773	0	0.02	1
Srsf7	0.122275	0.769523	0.254	0.122	1
Rpl32	0.12257	0.479003	0.627	0.531	1
Akirin2	0.122992	-1.75415	0.017	0.082	1
Lrrc41	0.122992	-1.62191	0.017	0.082	1
Agrn	0.122992	-1.13031	0.017	0.082	1
Man2a1	0.122992	-1.49857	0.017	0.082	1
Mlf2	0.12367	1.05538	0.186	0.082	1
Ube2f	0.123998	1.51088	0.153	0.061	1
Igsf6	0.124252	0.899269	0.407	0.286	1
Il1b	0.124398	-0.115046	1	1	1
Dip2b	0.125387	-1.17481	0.068	0.163	1
Trappc1	0.125517	2.30295	0.119	0.041	1
Atp6v1f	0.126001	0.651749	0.525	0.408	1
Lmo4	0.126409	1.53448	0.203	0.102	1
Med12l	0.126787	1.48546	0.153	0.061	1
G0s2	0.127408	0.64905	0.508	0.388	1
C5ar1	0.127692	-0.428631	0.559	0.694	1
Med7	0.128226	0.824347	0.22	0.102	1
Zfp106	0.129624	1.16046	0.153	0.061	1
Pik3r5	0.129624	1.35941	0.153	0.061	1
Mxi1	0.129624	1.45516	0.153	0.061	1
Trem3	0.129654	0.949788	0.407	0.286	1
mt-Atp8	0.131061	-1.35795	0.068	0.163	1
Atpif1	0.131092	1.16749	0.305	0.204	1
Gnaq	0.131437	1.01422	0.254	0.143	1
Atp1a3	0.131997	2.33346	0.119	0.041	1
Polr2a	0.131997	2.27712	0.119	0.041	1
Tent2	0.131997	1.85776	0.119	0.041	1
Nsmce4a	0.132511	1.49916	0.153	0.061	1
Usp2	0.132511	1.45197	0.153	0.061	1
Sltm	0.132511	1.42438	0.153	0.061	1
Ubxn4	0.133065	-1.06486	0.119	0.224	1
Bach1	0.133065	-1.10102	0.119	0.224	1
Hexb	0.133148	1.42868	0.305	0.204	1
Pim1	0.133214	0.23291	0.949	0.755	1
Cep83	0.134063	1.1185	0.237	0.122	1
Slc16a6	0.134351	-0.738693	0.051	0.143	1
Rpn1	0.135333	1.86177	0.119	0.041	1
Mgat4b	0.135333	1.91316	0.119	0.041	1
Tubb2b	0.135333	1.94177	0.119	0.041	1
Tut4	0.135446	1.70984	0.153	0.061	1
Thrap3	0.135446	1.41568	0.153	0.061	1
Ddx46	0.135446	1.41464	0.153	0.061	1
Ccnl2	0.135778	1.40519	0.237	0.143	1
Pxn	0.135824	0.798234	0.339	0.224	1
Selenow	0.136362	1.23671	0.203	0.102	1
Tmed9	0.136362	1.03621	0.203	0.102	1
Zmym5	0.136386	-2.04611	0.034	0.102	1
Vdac3	0.13669	1.13806	0.186	0.082	1
B430306N03Rik	0.136933	-0.66535	0.068	0.163	1
Srp14	0.137379	0.938857	0.407	0.367	1
Actg1	0.137958	0.608312	0.864	0.837	1
Ppic	0.138007	-1.63638	0.068	0.122	1
Fuca1	0.138136	1.09709	0.237	0.143	1
Cdkn1a	0.1383	-1.08703	0.153	0.265	1
Arap1	0.138432	1.42364	0.153	0.061	1
Mrpl14	0.138432	1.06695	0.153	0.061	1
Hspe1	0.138733	2.01123	0.119	0.041	1
Vmn1r37	0.139735	4.70068	0.085	0	1
Inpp4a	0.139735	2.33498	0.085	0.02	1
Stom	0.139735	4.41361	0.085	0.02	1
Madd	0.139735	3.34102	0.085	0.02	1
Rbck1	0.139735	2.41231	0.085	0.02	1
Ankrd13c	0.139735	2.88921	0.085	0.02	1
Mknk1	0.139735	2.74627	0.085	0.02	1
Letm1	0.139735	2.40934	0.085	0.02	1
Stim2	0.139735	2.36635	0.085	0.02	1
Lair1	0.139735	2.96531	0.085	0.02	1
Xpo6	0.139735	2.33991	0.085	0.02	1
Chmp1a	0.139735	2.84884	0.085	0.02	1
Msl2	0.139735	2.21798	0.085	0.02	1
Trf	0.139735	2.39217	0.085	0.02	1
Klhdc2	0.139735	2.3362	0.085	0.02	1
Tmem251	0.139735	2.44911	0.085	0.02	1
Vps51	0.139735	3.10491	0.085	0.02	1
Adgb	0.140233	-1.84931	0.034	0.102	1
Prr13	0.140649	1.05564	0.254	0.143	1
Gadd45g	0.141306	-1.22445	0.136	0.245	1
Mydgf	0.141469	1.12265	0.153	0.061	1
mt-Atp6	0.141655	-0.849846	0.78	0.898	1
Prr5l	0.14167	-1.06135	0.085	0.184	1
Fam76a	0.142199	1.66729	0.119	0.041	1
Coro1c	0.142199	1.56224	0.119	0.041	1
Ncf1	0.14246	0.683199	0.508	0.408	1
Mark2	0.143786	-0.867862	0.136	0.245	1
Ino80	0.143951	2.06877	0.085	0.02	1
Alg5	0.143951	1.93382	0.085	0.02	1
Wipi2	0.143951	2.30896	0.085	0.02	1
Tm7sf3	0.143951	2.13928	0.085	0.02	1
Cebpg	0.143951	2.14145	0.085	0.02	1
Myo6	0.143951	2.28587	0.085	0.02	1
Rmnd5b	0.143951	2.56276	0.085	0.02	1
Glod4	0.143951	2.05741	0.085	0.02	1
Syngr2	0.143951	2.05934	0.085	0.02	1
Auh	0.143951	2.23139	0.085	0.02	1
Isca1	0.143951	2.31438	0.085	0.02	1
Btbd7	0.143951	2.23769	0.085	0.02	1
Rps19bp1	0.143951	2.61996	0.085	0.02	1
Fyttd1	0.143951	1.96999	0.085	0.02	1
Fkbp5	0.143951	2.14681	0.085	0.02	1
Cpt1a	0.143951	2.69192	0.085	0.02	1
Pdzd8	0.143951	2.00004	0.085	0.02	1
Nfatc3	0.144162	-2.32297	0.034	0.102	1
Mical1	0.144216	0.993442	0.203	0.102	1
Fth1	0.145296	-0.449751	1	1	1
Pnpla2	0.145437	1.13765	0.254	0.143	1
Brd7	0.145731	1.53366	0.119	0.041	1
Gpbp1	0.145731	1.61552	0.119	0.041	1
Vrk1	0.145731	1.7443	0.119	0.041	1
Pigp	0.145731	1.51792	0.119	0.041	1
Ndufa11	0.145731	1.81635	0.119	0.041	1
Wsb1	0.146018	1.37055	0.169	0.082	1
Cebpb	0.14607	0.363346	0.949	0.898	1
Krit1	0.146119	-0.858608	0.068	0.163	1
Notch2	0.146909	-0.25035	0.102	0.224	1
Ostc	0.146909	1.02165	0.203	0.102	1
Pdcd5	0.146909	1.01357	0.203	0.102	1
Tomm22	0.147294	0.633111	0.39	0.265	1
Gns	0.148176	-2.12945	0.034	0.102	1
Apip	0.148264	2.00752	0.085	0.02	1
Snrpb2	0.148264	2.42754	0.085	0.02	1
Ppdpf	0.148264	2.16367	0.085	0.02	1
Papss1	0.148264	2.30743	0.085	0.02	1
Thoc2l	0.148264	1.93369	0.085	0.02	1
Oat	0.148264	2.17942	0.085	0.02	1
Commd4	0.148264	2.27273	0.085	0.02	1
Spock1	0.148264	2.3206	0.085	0.02	1
Ncoa1	0.148264	1.8644	0.085	0.02	1
Ubr5	0.148264	1.98654	0.085	0.02	1
Rpp21	0.148264	2.28976	0.085	0.02	1
H4c9	0.149283	-0.491547	0.068	0.163	1
Edem2	0.14933	1.52354	0.119	0.041	1
Mtus1	0.14933	1.71239	0.119	0.041	1
Usp38	0.14933	1.50009	0.119	0.041	1
Nck1	0.14933	1.51639	0.119	0.041	1
Serpinb6a	0.14933	1.71633	0.119	0.041	1
Arl11	0.149641	1.01259	0.203	0.102	1
Lrg1	0.149666	-0.461342	0.542	0.694	1
Ndufs7	0.150004	0.413103	0.271	0.143	1
Dbi	0.150885	0.527575	0.153	0.061	1
Mapkap1	0.150885	1.15596	0.153	0.061	1
Eif3i	0.151974	1.46437	0.169	0.082	1
Bcl2a1d	0.151974	1.35422	0.169	0.082	1
Sypl	0.151974	1.62539	0.169	0.082	1
Asah1	0.152135	1.11095	0.22	0.122	1
Srpr	0.152274	-1.41189	0.034	0.102	1
Cbx4	0.152274	-1.62214	0.034	0.102	1
Rab24	0.152274	-2.03356	0.034	0.102	1
Zfp622	0.1525	-0.651334	0.068	0.163	1
Tor2a	0.152675	1.81169	0.085	0.02	1
Ank2	0.152675	1.83883	0.085	0.02	1
Hnrnpr	0.152675	1.95398	0.085	0.02	1
Swap70	0.152675	1.94299	0.085	0.02	1
Washc4	0.152675	1.94923	0.085	0.02	1
Tmc6	0.152675	1.64519	0.085	0.02	1
Brix1	0.152675	2.05496	0.085	0.02	1
Mga	0.152996	1.3418	0.119	0.041	1
Mrpl24	0.152996	1.18929	0.119	0.041	1
Prdm2	0.152996	0.770662	0.119	0.041	1
Dpf2	0.152996	1.72179	0.119	0.041	1
Trim12c	0.153214	0.765311	0.407	0.306	1
Btbd19	0.153491	-0.863851	0.085	0.184	1
Atp5pb	0.15529	-0.438685	0.288	0.449	1
Ube2e3	0.156458	-1.60736	0.034	0.102	1
Zdhhc9	0.156458	-1.93978	0.034	0.102	1
Impa1	0.156458	-1.4351	0.034	0.102	1
Rnf220	0.156458	-1.31642	0.034	0.102	1
Amfr	0.156458	-1.40911	0.034	0.102	1
Hpcal1	0.156458	-1.67625	0.034	0.102	1
Taf11	0.156458	-1.62115	0.034	0.102	1
Itgal	0.156608	-0.103792	0.305	0.51	1
Ppm1g	0.15673	1.27116	0.119	0.041	1
Ube3a	0.15673	1.48984	0.119	0.041	1
Camkk1	0.15673	1.17511	0.119	0.041	1
Ldb1	0.15673	1.37871	0.119	0.041	1
Map4k4	0.157186	1.94879	0.085	0.02	1
Ino80d	0.157186	1.58077	0.085	0.02	1
Ctdsp1	0.157186	1.58511	0.085	0.02	1
P2ry13	0.157186	1.66955	0.085	0.02	1
Rnpc3	0.157186	1.34973	0.085	0.02	1
Slc31a1	0.157186	1.8448	0.085	0.02	1
Tia1	0.157186	1.58731	0.085	0.02	1
Crbn	0.157186	1.56881	0.085	0.02	1
Josd2	0.157186	1.58684	0.085	0.02	1
Zfp646	0.157186	1.79175	0.085	0.02	1
Ddx39	0.157186	1.58331	0.085	0.02	1
Wdr61	0.157186	1.45072	0.085	0.02	1
Vps53	0.157186	1.68811	0.085	0.02	1
Zfp148	0.157186	1.50467	0.085	0.02	1
Abhd16a	0.157186	1.46695	0.085	0.02	1
Dpysl3	0.157186	0.82321	0.085	0.02	1
Gpbp1l1	0.157423	0.419621	0.153	0.061	1
Nfkbib	0.157423	0.874492	0.153	0.061	1
Tkt	0.157423	1.2512	0.153	0.061	1
H2-Eb1	0.157423	0.586147	0.153	0.061	1
Myl12a	0.15757	0.453279	0.627	0.51	1
Arhgap25	0.157957	0.76027	0.271	0.163	1
Klf13	0.157957	1.07658	0.271	0.163	1
Ssb	0.158112	1.51404	0.169	0.082	1
Pdia6	0.158112	1.41363	0.169	0.082	1
Sidt2	0.158153	1.17629	0.237	0.143	1
Mgat4a	0.1583	-1.76938	0.068	0.143	1
Pafah1b1	0.158392	0.943992	0.339	0.245	1
Rsbn1l	0.159372	0.430512	0.237	0.122	1
Ifit2	0.159372	0.994896	0.237	0.122	1
Gadd45b	0.159467	0.380228	0.627	0.51	1
Msra	0.159676	-0.581976	0.085	0.184	1
Timm23	0.160279	1.10316	0.22	0.122	1
Uimc1	0.160533	0.619301	0.119	0.041	1
Arhgap5	0.160533	0.594562	0.119	0.041	1
Rbm18	0.160729	-1.42676	0.034	0.102	1
Zfp384	0.160729	-1.40177	0.034	0.102	1
Sdf2l1	0.160729	-1.26437	0.034	0.102	1
Lemd2	0.160729	-1.62745	0.034	0.102	1
Dtx4	0.160729	-1.93688	0.034	0.102	1
Ubl5	0.160787	0.158753	0.763	0.612	1
Orai1	0.160803	0.992596	0.237	0.143	1
Mvb12a	0.161251	1.2417	0.169	0.082	1
Rnf4	0.161796	1.66079	0.085	0.02	1
Rev3l	0.161796	1.2101	0.085	0.02	1
Psmd6	0.161796	1.08653	0.085	0.02	1
Med4	0.161796	0.923559	0.085	0.02	1
Secisbp2	0.161796	1.36725	0.085	0.02	1
Abcf1	0.161796	1.22901	0.085	0.02	1
Uqcrb	0.161825	0.898524	0.288	0.184	1
Ptpn6	0.162105	-1.01471	0.39	0.469	1
mt-Co3	0.1629	-1.06038	0.847	0.898	1
Calm3	0.163806	0.716083	0.407	0.306	1
Rhog	0.163937	-0.607233	0.458	0.551	1
Akt2	0.164173	0.858236	0.153	0.061	1
Tbpl1	0.164405	1.18221	0.119	0.041	1
Tubb5	0.164405	1.06701	0.119	0.041	1
Cct2	0.164405	-1.54833	0.051	0.122	1
Bcl6	0.165087	-1.8537	0.034	0.102	1
Atg12	0.165087	-1.30862	0.034	0.102	1
Cmip	0.165351	1.61092	0.136	0.061	1
Ncf2	0.165564	0.523297	0.678	0.653	1
Snu13	0.165584	0.909593	0.271	0.163	1
Pnrc2	0.166047	-0.736377	0.085	0.184	1
Bhlhe40	0.16686	-0.657223	0.271	0.367	1
Ppig	0.167669	1.38296	0.169	0.082	1
Hnrnpd	0.167669	1.20561	0.169	0.082	1
Pcf11	0.167669	1.21426	0.169	0.082	1
Lsm6	0.167669	1.32494	0.169	0.082	1
mt-Co2	0.1683	-0.72522	0.763	0.898	1
Gm36028	0.168343	0.637736	0.085	0.041	1
Dcun1d5	0.168348	0.963505	0.119	0.041	1
Med10	0.168348	1.22947	0.119	0.041	1
Id2	0.168748	1.35746	0.22	0.122	1
Il10rb	0.168952	-0.595355	0.136	0.265	1
Ldha	0.169314	-0.522164	0.288	0.429	1
St8sia4	0.169533	-0.893955	0.034	0.102	1
Cers6	0.169533	-1.3117	0.034	0.102	1
Pygo2	0.169533	-0.20178	0.034	0.102	1
Pacsin2	0.169533	-0.948743	0.034	0.102	1
Rpl19	0.170395	0.423335	0.763	0.694	1
Gnas	0.17118	0.934172	0.322	0.204	1
Limd2	0.172053	0.83592	0.305	0.204	1
Rhof	0.17236	1.22827	0.119	0.041	1
Tor3a	0.17236	-1.54325	0.051	0.122	1
Trip11	0.17236	-1.89255	0.051	0.122	1
Samd4b	0.172635	2.01286	0.136	0.061	1
Mitd1	0.172635	-1.75532	0.068	0.143	1
Abi3	0.17267	0.574256	0.424	0.286	1
Tmem167	0.173574	0.64554	0.356	0.224	1
Kmt2c	0.174069	-0.964007	0.034	0.102	1
Mapk6	0.174069	-0.843174	0.034	0.102	1
Nt5e	0.174069	-0.651277	0.034	0.102	1
H2-Aa	0.174069	-0.945112	0.034	0.102	1
Mfsd6	0.174278	0.896561	0.169	0.082	1
Hmgn2	0.176366	-1.43001	0.068	0.143	1
Daxx	0.176366	-1.33887	0.068	0.143	1
Psme1	0.176733	0.804595	0.373	0.265	1
Ubl4a	0.178695	-0.70208	0.034	0.102	1
Utrn	0.178695	-0.776872	0.034	0.102	1
Hmox1	0.178695	-0.678433	0.034	0.102	1
Treml2	0.178695	-0.320136	0.034	0.102	1
Tuba1a	0.17882	0.707122	0.322	0.204	1
Pmaip1	0.180157	1.7859	0.136	0.061	1
Fndc3b	0.180157	-1.25433	0.068	0.143	1
Ran	0.180294	1.06801	0.237	0.143	1
Pfn1	0.180413	-0.189018	0.915	0.918	1
Tmod3	0.180557	0.540492	0.22	0.122	1
Romo1	0.180853	1.48063	0.186	0.102	1
Cdc42ep3	0.180853	1.62668	0.186	0.102	1
Sp100	0.181161	0.603402	0.458	0.367	1
Ndufb9	0.183392	0.515189	0.525	0.429	1
Trim30b	0.184379	-0.585392	0.305	0.408	1
Smc3	0.184828	-1.46021	0.051	0.122	1
Jmjd1c	0.186333	0.742419	0.339	0.224	1
Snx18	0.186518	-0.773161	0.22	0.347	1
Rchy1	0.186687	0.889424	0.22	0.122	1
Hcst	0.186806	0.631191	0.39	0.286	1
Ddit3	0.187047	-0.859895	0.186	0.286	1
Ddx39b	0.18792	1.5201	0.136	0.061	1
Rps24	0.18795	0.37492	0.78	0.694	1
Selenos	0.18795	0.877459	0.288	0.184	1
Klf6	0.188002	-0.461598	0.356	0.49	1
Zfand3	0.188075	1.17769	0.169	0.082	1
Egln3	0.189128	-1.47418	0.051	0.122	1
Stat6	0.190102	-1.1745	0.085	0.163	1
AA467197	0.190403	0.165501	0.39	0.265	1
Cct5	0.190814	1.27732	0.186	0.102	1
Med30	0.191136	1.41473	0.203	0.122	1
Znfx1	0.191647	0.83319	0.169	0.082	1
Ap1s2	0.191892	1.688	0.136	0.061	1
Lamtor5	0.191892	1.26254	0.136	0.061	1
Clcn4	0.191892	1.49817	0.136	0.061	1
Sik3	0.191892	1.27705	0.136	0.061	1
1110065P20Rik	0.191892	-1.19145	0.068	0.143	1
Oaz1	0.192159	0.41452	0.746	0.735	1
Chic2	0.192192	0.933334	0.237	0.143	1
Pbx1	0.192192	-1.09807	0.153	0.245	1
Oasl1	0.192668	-0.546149	0.356	0.49	1
Rpl14	0.19298	0.182662	0.525	0.367	1
Mrps28	0.193502	-1.10288	0.051	0.122	1
Cox7c	0.194061	0.825876	0.441	0.408	1
Mxd1	0.194094	-0.29161	0.61	0.735	1
Rpl10a	0.194177	-0.67471	0.237	0.347	1
Eid1	0.194223	1.27139	0.186	0.102	1
Ppp2r5c	0.194223	1.10667	0.186	0.102	1
Kcmf1	0.195926	-1.1779	0.068	0.143	1
Eif4ebp2	0.195934	-1.06383	0.102	0.184	1
Unc119	0.196167	0.915144	0.22	0.122	1
Cox7a2	0.197596	0.470661	0.661	0.571	1
Eif3j1	0.19795	-1.01048	0.051	0.122	1
Tfe3	0.19795	-1.1864	0.051	0.122	1
Zbtb24	0.19795	-0.709743	0.051	0.122	1
Ddt	0.19795	-0.863661	0.051	0.122	1
Laptm5	0.198073	0.268664	0.864	0.776	1
Ctsd	0.19879	-0.392027	0.441	0.551	1
Myo9b	0.19894	0.784849	0.169	0.082	1
Mcmdc2	0.199983	3.3489	0.034	0	1
Vwa3b	0.199983	2.8934	0.034	0	1
Nrp2	0.199983	2.49546	0.034	0	1
Fzd5	0.199983	4.0424	0.034	0	1
Atic	0.199983	3.37182	0.034	0	1
Rhbdd1	0.199983	3.31711	0.034	0	1
A630001G21Rik	0.199983	3.83119	0.034	0	1
Hjurp	0.199983	3.23541	0.034	0	1
3110009E18Rik	0.199983	2.88102	0.034	0	1
Rabif	0.199983	3.28852	0.034	0	1
Nek7	0.199983	4.18579	0.034	0	1
Tor1aip2	0.199983	3.62103	0.034	0	1
Tada1	0.199983	3.37285	0.034	0	1
Uhmk1	0.199983	3.14131	0.034	0	1
Pigm	0.199983	3.49963	0.034	0	1
Ifi203	0.199983	3.25425	0.034	0	1
Efcab2	0.199983	3.70199	0.034	0	1
Pycr2	0.199983	2.56393	0.034	0	1
Fam71a	0.199983	4.33011	0.034	0	1
Nmt2	0.199983	3.32193	0.034	0	1
Rpp38	0.199983	2.87516	0.034	0	1
Frmd4a	0.199983	3.04313	0.034	0	1
Sec61a2	0.199983	3.48213	0.034	0	1
Il15ra	0.199983	4.01529	0.034	0	1
Psd4	0.199983	3.80206	0.034	0	1
Ehmt1	0.199983	2.92293	0.034	0	1
Nsmf	0.199983	2.75079	0.034	0	1
Bmyc	0.199983	3.3465	0.034	0	1
Abo	0.199983	2.99698	0.034	0	1
Surf1	0.199983	3.27348	0.034	0	1
Ttf1	0.199983	3.40915	0.034	0	1
Urm1	0.199983	3.23029	0.034	0	1
Lrrc8a	0.199983	3.01861	0.034	0	1
Tor1b	0.199983	3.16333	0.034	0	1
Ptges2	0.199983	3.91253	0.034	0	1
Lrsam1	0.199983	4.10339	0.034	0	1
Gapvd1	0.199983	4.13998	0.034	0	1
Rif1	0.199983	3.38631	0.034	0	1
Stam2	0.199983	3.6229	0.034	0	1
Fmnl2	0.199983	3.24319	0.034	0	1
Mettl5	0.199983	2.91312	0.034	0	1
Dcaf17	0.199983	3.81605	0.034	0	1
Hat1	0.199983	3.28566	0.034	0	1
Rbm45	0.199983	3.56278	0.034	0	1
Cwc22	0.199983	3.25861	0.034	0	1
Tmx2	0.199983	3.97769	0.034	0	1
Mybpc3	0.199983	3.57193	0.034	0	1
Ext2	0.199983	2.93535	0.034	0	1
Hipk3	0.199983	3.39577	0.034	0	1
Ccdc34	0.199983	3.46336	0.034	0	1
Stard9	0.199983	3.71244	0.034	0	1
Ckmt1	0.199983	3.73776	0.034	0	1
Ell3	0.199983	3.20797	0.034	0	1
Ndufaf5	0.199983	3.12627	0.034	0	1
Smim26	0.199983	3.64438	0.034	0	1
Kiz	0.199983	2.90112	0.034	0	1
Psmf1	0.199983	3.39952	0.034	0	1
Pxmp4	0.199983	3.11054	0.034	0	1
Ada	0.199983	3.19718	0.034	0	1
Tomm34	0.199983	3.61431	0.034	0	1
Pigt	0.199983	3.16217	0.034	0	1
Trp53rkb	0.199983	2.89883	0.034	0	1
Rae1	0.199983	3.30519	0.034	0	1
Ndp	0.199983	2.68662	0.034	0	1
Zbtb33	0.199983	3.11418	0.034	0	1
Mospd1	0.199983	3.68444	0.034	0	1
Mmgt1	0.199983	3.26075	0.034	0	1
Htatsf1	0.199983	3.56687	0.034	0	1
F8a	0.199983	3.53531	0.034	0	1
Brwd3	0.199983	3.53945	0.034	0	1
Timm8a1	0.199983	3.36216	0.034	0	1
Tceal1	0.199983	3.45464	0.034	0	1
Tmsb15b2	0.199983	3.13207	0.034	0	1
Rnf128	0.199983	1.64652	0.034	0	1
Nbdy	0.199983	2.69169	0.034	0	1
Trappc2	0.199983	3.52681	0.034	0	1
Zc2hc1a	0.199983	2.35792	0.034	0	1
Armc1	0.199983	3.39732	0.034	0	1
Mtfr1	0.199983	3.64818	0.034	0	1
Spata5	0.199983	3.23031	0.034	0	1
Ankrd50	0.199983	3.35016	0.034	0	1
Mfsd1	0.199983	3.58983	0.034	0	1
Trim2	0.199983	3.75248	0.034	0	1
Etv3	0.199983	3.47083	0.034	0	1
Adam15	0.199983	3.1353	0.034	0	1
S100a1	0.199983	3.85585	0.034	0	1
Tchh	0.199983	3.58533	0.034	0	1
Tars2	0.199983	2.86209	0.034	0	1
Anp32e	0.199983	2.79635	0.034	0	1
Polr3gl	0.199983	3.26807	0.034	0	1
Phtf1	0.199983	3.80548	0.034	0	1
Gstm1	0.199983	3.38403	0.034	0	1
Ap1ar	0.199983	2.94263	0.034	0	1
Arhgef38	0.199983	2.42538	0.034	0	1
Znhit6	0.199983	3.28181	0.034	0	1
Mcoln3	0.199983	2.64087	0.034	0	1
Ccnc	0.199983	3.71935	0.034	0	1
Rragd	0.199983	2.33798	0.034	0	1
Hint2	0.199983	3.17641	0.034	0	1
Abitram	0.199983	2.91103	0.034	0	1
Bspry	0.199983	2.98992	0.034	0	1
Dnajc6	0.199983	2.83108	0.034	0	1
Pomgnt1	0.199983	3.41354	0.034	0	1
Dmap1	0.199983	3.52479	0.034	0	1
Ccdc28b	0.199983	2.98016	0.034	0	1
Tmem222	0.199983	3.79023	0.034	0	1
Gpatch3	0.199983	2.7831	0.034	0	1
Lin28a	0.199983	3.41557	0.034	0	1
Ubxn11	0.199983	3.81301	0.034	0	1
Plod1	0.199983	3.61023	0.034	0	1
Mtor	0.199983	2.86565	0.034	0	1
Dbf4	0.199983	3.94758	0.034	0	1
Pclo	0.199983	2.91674	0.034	0	1
Ube3c	0.199983	3.28009	0.034	0	1
Mpv17	0.199983	2.98439	0.034	0	1
Depdc5	0.199983	2.69286	0.034	0	1
Fam193a	0.199983	3.22152	0.034	0	1
Nop14	0.199983	3.28328	0.034	0	1
Lrpap1	0.199983	3.84913	0.034	0	1
Tada2b	0.199983	2.99682	0.034	0	1
Lap3	0.199983	3.41369	0.034	0	1
Anapc4	0.199983	3.30178	0.034	0	1
Noa1	0.199983	3.69201	0.034	0	1
Naaa	0.199983	2.8224	0.034	0	1
Nup54	0.199983	3.83454	0.034	0	1
Rasgef1b	0.199983	3.09684	0.034	0	1
Abcg3	0.199983	3.21943	0.034	0	1
Pus1	0.199983	3.39811	0.034	0	1
Hps4	0.199983	3.77411	0.034	0	1
Ssh1	0.199983	2.76564	0.034	0	1
Oas1g	0.199983	3.60199	0.034	0	1
Tctn1	0.199983	3.64884	0.034	0	1
Anapc7	0.199983	3.32281	0.034	0	1
Bcl7a	0.199983	2.86962	0.034	0	1
Zfp664	0.199983	2.98053	0.034	0	1
Stx2	0.199983	4.05097	0.034	0	1
Sfswap	0.199983	2.83719	0.034	0	1
Rhbdd2	0.199983	3.15867	0.034	0	1
Dtx2	0.199983	3.54406	0.034	0	1
Ap1s1	0.199983	3.46714	0.034	0	1
Pop7	0.199983	3.49567	0.034	0	1
Taf6	0.199983	2.92543	0.034	0	1
Zfp157	0.199983	3.56798	0.034	0	1
Ints1	0.199983	2.89036	0.034	0	1
Psmg3	0.199983	3.87153	0.034	0	1
Iqce	0.199983	3.44636	0.034	0	1
Cyth3	0.199983	3.60101	0.034	0	1
Usp42	0.199983	3.50298	0.034	0	1
Lmtk2	0.199983	3.51183	0.034	0	1
Zfp655	0.199983	3.13298	0.034	0	1
Mtif3	0.199983	3.51085	0.034	0	1
Mios	0.199983	3.49809	0.034	0	1
Cped1	0.199983	3.65744	0.034	0	1
Snd1	0.199983	3.36419	0.034	0	1
Cyren	0.199983	3.5374	0.034	0	1
Trim24	0.199983	2.89554	0.034	0	1
Zfp398	0.199983	3.27291	0.034	0	1
Zfp282	0.199983	3.46914	0.034	0	1
Zfp777	0.199983	3.59576	0.034	0	1
Lrrc61	0.199983	3.21143	0.034	0	1
Hibadh	0.199983	3.16686	0.034	0	1
Kbtbd2	0.199983	3.26457	0.034	0	1
Fam13a	0.199983	2.77151	0.034	0	1
Rmnd5a	0.199983	2.98318	0.034	0	1
Rnf103	0.199983	2.69116	0.034	0	1
Wbp1	0.199983	3.11484	0.034	0	1
Add2	0.199983	2.97332	0.034	0	1
Fam136a	0.199983	3.41626	0.034	0	1
Rab43	0.199983	3.91378	0.034	0	1
Nr2c2	0.199983	3.56145	0.034	0	1
Frmd4b	0.199983	3.24962	0.034	0	1
Shq1	0.199983	3.86721	0.034	0	1
Lrrn1	0.199983	2.87454	0.034	0	1
Emc3	0.199983	3.08894	0.034	0	1
Sec13	0.199983	3.27727	0.034	0	1
Syn2	0.199983	2.97052	0.034	0	1
Cacna1c	0.199983	2.70935	0.034	0	1
Nop2	0.199983	3.57871	0.034	0	1
Vamp1	0.199983	3.08594	0.034	0	1
Ndufa9	0.199983	2.42684	0.034	0	1
Clec12a	0.199983	3.37438	0.034	0	1
H4f16	0.199983	3.65228	0.034	0	1
Dera	0.199983	3.02633	0.034	0	1
Ints13	0.199983	3.6262	0.034	0	1
Leng9	0.199983	4.13513	0.034	0	1
Fiz1	0.199983	3.61841	0.034	0	1
Zfp444	0.199983	3.09645	0.034	0	1
Vmn1r73	0.199983	3.55435	0.034	0	1
Zfp329	0.199983	4.10172	0.034	0	1
Ccdc9	0.199983	3.85908	0.034	0	1
Zc3h4	0.199983	3.8698	0.034	0	1
Prkd2	0.199983	3.38832	0.034	0	1
Cd3eap	0.199983	3.18505	0.034	0	1
Pvr	0.199983	3.05255	0.034	0	1
Smg9	0.199983	3.42536	0.034	0	1
Snrpa	0.199983	2.54612	0.034	0	1
Map4k1	0.199983	2.45645	0.034	0	1
Zfp30	0.199983	2.26427	0.034	0	1
U2af1l4	0.199983	3.31443	0.034	0	1
Cpeb1	0.199983	3.08422	0.034	0	1
Crebzf	0.199983	3.39446	0.034	0	1
Pak1	0.199983	3.10437	0.034	0	1
Stard10	0.199983	2.91488	0.034	0	1
Tub	0.199983	3.45923	0.034	0	1
Trim66	0.199983	2.77365	0.034	0	1
Ctr9	0.199983	3.13752	0.034	0	1
Mical2	0.199983	3.89866	0.034	0	1
D430042O09Rik	0.199983	3.32672	0.034	0	1
AI467606	0.199983	3.66787	0.034	0	1
Zfp553	0.199983	2.82893	0.034	0	1
Vkorc1	0.199983	2.81646	0.034	0	1
9430038I01Rik	0.199983	3.73096	0.034	0	1
Inpp5a	0.199983	3.5818	0.034	0	1
Slc25a22	0.199983	3.55068	0.034	0	1
Cdkn1c	0.199983	3.3241	0.034	0	1
Dhcr7	0.199983	3.09361	0.034	0	1
Ano1	0.199983	3.08917	0.034	0	1
Akap12	0.199983	4.09524	0.034	0	1
Ccdc170	0.199983	2.36823	0.034	0	1
Myb	0.199983	3.34794	0.034	0	1
Vnn3	0.199983	4.231	0.034	0	1
Nt5dc1	0.199983	3.80714	0.034	0	1
Fig4	0.199983	3.74496	0.034	0	1
Ostm1	0.199983	3.49632	0.034	0	1
Fabp7	0.199983	3.98974	0.034	0	1
Mcu	0.199983	3.88402	0.034	0	1
Cdh23	0.199983	3.194	0.034	0	1
Gnaz	0.199983	3.01634	0.034	0	1
Mbd3	0.199983	2.48795	0.034	0	1
Matk	0.199983	3.77119	0.034	0	1
Fbxo7	0.199983	3.22785	0.034	0	1
Nedd1	0.199983	4.03175	0.034	0	1
Cradd	0.199983	3.15912	0.034	0	1
Dcn	0.199983	3.40162	0.034	0	1
Syt1	0.199983	2.76511	0.034	0	1
D930020B18Rik	0.199983	3.44145	0.034	0	1
Dtx3	0.199983	3.62604	0.034	0	1
Tubgcp3	0.199983	3.9407	0.034	0	1
Tfdp1	0.199983	2.86097	0.034	0	1
Plat	0.199983	2.82046	0.034	0	1
Nrg1	0.199983	2.4438	0.034	0	1
Tex15	0.199983	3.63419	0.034	0	1
Eri1	0.199983	3.33102	0.034	0	1
Micu3	0.199983	2.70549	0.034	0	1
Stox2	0.199983	2.9954	0.034	0	1
Cep44	0.199983	2.97322	0.034	0	1
Hmgxb4	0.199983	3.87454	0.034	0	1
Zfp330	0.199983	3.16061	0.034	0	1
Mri1	0.199983	3.4299	0.034	0	1
Gadd45gip1	0.199983	3.44003	0.034	0	1
Syce2	0.199983	3.16355	0.034	0	1
Mast1	0.199983	3.30999	0.034	0	1
Ripor1	0.199983	4.15352	0.034	0	1
Edc4	0.199983	3.47833	0.034	0	1
Cog4	0.199983	3.58217	0.034	0	1
Ddx19a	0.199983	3.36405	0.034	0	1
Piezo1	0.199983	3.66643	0.034	0	1
Def8	0.199983	3.17613	0.034	0	1
Afg3l1	0.199983	3.57624	0.034	0	1
Rhou	0.199983	2.40669	0.034	0	1
Fezf2	0.199983	3.3731	0.034	0	1
Oxsm	0.199983	3.21377	0.034	0	1
Saysd1	0.199983	3.31634	0.034	0	1
Actr8	0.199983	3.26801	0.034	0	1
Dcp1a	0.199983	3.41042	0.034	0	1
Ccser2	0.199983	3.04188	0.034	0	1
Sh2d4b	0.199983	3.34063	0.034	0	1
Osgep	0.199983	3.21752	0.034	0	1
Rnase6	0.199983	2.95612	0.034	0	1
Zfp219	0.199983	3.21618	0.034	0	1
Oxa1l	0.199983	3.07877	0.034	0	1
Dhrs4	0.199983	3.04078	0.034	0	1
Mdp1	0.199983	3.96165	0.034	0	1
Ints6	0.199983	3.93294	0.034	0	1
Fdft1	0.199983	3.33073	0.034	0	1
Hmbox1	0.199983	2.98606	0.034	0	1
Fbxo16	0.199983	2.39756	0.034	0	1
Elp3	0.199983	3.23307	0.034	0	1
R3hcc1	0.199983	3.42125	0.034	0	1
Tnfrsf10b	0.199983	3.46291	0.034	0	1
Cog3	0.199983	3.81298	0.034	0	1
Serp2	0.199983	3.22182	0.034	0	1
Klf5	0.199983	3.66803	0.034	0	1
Tpm3-rs7	0.199983	3.09486	0.034	0	1
Mtmr2	0.199983	3.68517	0.034	0	1
Mre11a	0.199983	3.15326	0.034	0	1
9530077C05Rik	0.199983	3.02622	0.034	0	1
Ncapd3	0.199983	4.24397	0.034	0	1
Siae	0.199983	2.7446	0.034	0	1
Spa17	0.199983	2.67687	0.034	0	1
Hmbs	0.199983	3.49156	0.034	0	1
Ccdc84	0.199983	3.68652	0.034	0	1
Zbtb16	0.199983	3.16129	0.034	0	1
Fbxo22	0.199983	2.68354	0.034	0	1
Edc3	0.199983	3.40109	0.034	0	1
Adpgk	0.199983	3.33802	0.034	0	1
Parp6	0.199983	3.01732	0.034	0	1
Csnk1g1	0.199983	3.11577	0.034	0	1
Tmod2	0.199983	2.41485	0.034	0	1
Zfp949	0.199983	3.20858	0.034	0	1
Rbm15b	0.199983	3.29067	0.034	0	1
Tcta	0.199983	3.44205	0.034	0	1
Dhx30	0.199983	3.03869	0.034	0	1
Cspg5	0.199983	2.72518	0.034	0	1
Gadl1	0.199983	3.47992	0.034	0	1
Cmc1	0.199983	3.70448	0.034	0	1
Ss18l2	0.199983	3.02371	0.034	0	1
Exosc7	0.199983	3.36617	0.034	0	1
Drg1	0.199983	2.90066	0.034	0	1
Dusp18	0.199983	3.7842	0.034	0	1
Polm	0.199983	2.79423	0.034	0	1
Tmed4	0.199983	2.77373	0.034	0	1
Tns3	0.199983	3.60545	0.034	0	1
Ehbp1	0.199983	4.08081	0.034	0	1
Papolg	0.199983	2.69718	0.034	0	1
Mtif2	0.199983	3.02169	0.034	0	1
Hba-a2	0.199983	3.51182	0.034	0	1
Lsm11	0.199983	3.30804	0.034	0	1
Cdkn2aipnl	0.199983	3.52875	0.034	0	1
Sco1	0.199983	3.08857	0.034	0	1
Slc25a35	0.199983	2.49796	0.034	0	1
Wrap53	0.199983	3.51578	0.034	0	1
Acadvl	0.199983	3.06167	0.034	0	1
Rpain	0.199983	2.97966	0.034	0	1
4930563E22Rik	0.199983	3.94951	0.034	0	1
Nxn	0.199983	3.25819	0.034	0	1
Dusp14	0.199983	3.3237	0.034	0	1
Dhrs11	0.199983	3.76794	0.034	0	1
Ppm1d	0.199983	3.13264	0.034	0	1
Bcas3	0.199983	3.50537	0.034	0	1
Cuedc1	0.199983	3.48369	0.034	0	1
Phb	0.199983	3.3129	0.034	0	1
Cbx1	0.199983	3.16852	0.034	0	1
Lrrc46	0.199983	2.78248	0.034	0	1
Krt19	0.199983	3.22149	0.034	0	1
Mlx	0.199983	3.78432	0.034	0	1
Retreg3	0.199983	3.73015	0.034	0	1
Psme3	0.199983	3.6057	0.034	0	1
Eftud2	0.199983	2.98772	0.034	0	1
Dcaf7	0.199983	3.13626	0.034	0	1
Nol11	0.199983	3.64141	0.034	0	1
Helz	0.199983	3.29655	0.034	0	1
Prkca	0.199983	3.51105	0.034	0	1
Kctd2	0.199983	2.69421	0.034	0	1
Nup85	0.199983	3.51622	0.034	0	1
Gga3	0.199983	3.85415	0.034	0	1
Llgl2	0.199983	2.75743	0.034	0	1
Srp68	0.199983	3.33341	0.034	0	1
Cbx8	0.199983	3.58354	0.034	0	1
Sgsh	0.199983	3.54893	0.034	0	1
Dus1l	0.199983	3.39524	0.034	0	1
Mtr	0.199983	3.25476	0.034	0	1
H4c4	0.199983	2.62323	0.034	0	1
Tubb2a	0.199983	3.79592	0.034	0	1
Fars2	0.199983	3.51739	0.034	0	1
Id4	0.199983	3.11728	0.034	0	1
Cxcl14	0.199983	2.84684	0.034	0	1
Zfp87	0.199983	3.29883	0.034	0	1
Nsun2	0.199983	2.95161	0.034	0	1
Ccdc127	0.199983	3.44978	0.034	0	1
Mctp1	0.199983	3.90655	0.034	0	1
Xrcc4	0.199983	3.58178	0.034	0	1
Atg10	0.199983	2.5346	0.034	0	1
Jmy	0.199983	3.45263	0.034	0	1
Sv2c	0.199983	3.27815	0.034	0	1
Rad17	0.199983	2.89499	0.034	0	1
Ak6	0.199983	3.53092	0.034	0	1
Gapt	0.199983	3.36378	0.034	0	1
Ccno	0.199983	3.50502	0.034	0	1
Paip1	0.199983	3.2106	0.034	0	1
4833420G17Rik	0.199983	2.62444	0.034	0	1
Hs1bp3	0.199983	4.10982	0.034	0	1
Kcns3	0.199983	2.48778	0.034	0	1
Asap2	0.199983	3.64168	0.034	0	1
Taf1b	0.199983	3.25739	0.034	0	1
Trappc12	0.199983	3.79429	0.034	0	1
Scin	0.199983	3.08741	0.034	0	1
Cfl2	0.199983	2.69069	0.034	0	1
Dnaaf2	0.199983	3.17854	0.034	0	1
Dcaf5	0.199983	3.34587	0.034	0	1
Acot1	0.199983	3.27298	0.034	0	1
Ltbp2	0.199983	3.67365	0.034	0	1
Samd15	0.199983	3.57468	0.034	0	1
Alkbh1	0.199983	3.86529	0.034	0	1
Zfp839	0.199983	3.57129	0.034	0	1
Lifr	0.199983	3.63735	0.034	0	1
Lmbrd2	0.199983	4.07958	0.034	0	1
Ebag9	0.199983	2.77195	0.034	0	1
Utp23	0.199983	3.42011	0.034	0	1
Mrpl13	0.199983	2.74156	0.034	0	1
Zhx2	0.199983	3.365	0.034	0	1
Zfat	0.199983	3.61409	0.034	0	1
Cyhr1	0.199983	3.3655	0.034	0	1
Pdxp	0.199983	3.77201	0.034	0	1
Fam227a	0.199983	2.48589	0.034	0	1
Rangap1	0.199983	3.58725	0.034	0	1
Rrp7a	0.199983	2.74967	0.034	0	1
Rtl6	0.199983	4.03331	0.034	0	1
Fam118a	0.199983	3.32186	0.034	0	1
Ppp6r2	0.199983	3.56177	0.034	0	1
Sco2	0.199983	3.16656	0.034	0	1
Arsa	0.199983	3.08847	0.034	0	1
Mcrs1	0.199983	2.79806	0.034	0	1
Bcdin3d	0.199983	3.24512	0.034	0	1
Krt83	0.199983	2.99964	0.034	0	1
Atf7	0.199983	3.55037	0.034	0	1
Eef2kmt	0.199983	3.37636	0.034	0	1
Pmm2	0.199983	3.5542	0.034	0	1
Dexi	0.199983	3.52879	0.034	0	1
3110001I22Rik	0.199983	3.63297	0.034	0	1
Pdxdc1	0.199983	3.70878	0.034	0	1
Dgcr2	0.199983	3.55494	0.034	0	1
Slc25a1	0.199983	3.49014	0.034	0	1
Tango2	0.199983	3.09717	0.034	0	1
Opa1	0.199983	3.19847	0.034	0	1
Muc4	0.199983	3.7578	0.034	0	1
Lrch3	0.199983	3.6289	0.034	0	1
Pdia5	0.199983	3.97223	0.034	0	1
Ccdc58	0.199983	3.15025	0.034	0	1
Dzip3	0.199983	3.61275	0.034	0	1
Btg3	0.199983	3.86292	0.034	0	1
Psmg1	0.199983	3.92428	0.034	0	1
B3galt5	0.199983	3.67637	0.034	0	1
Vmn1r231	0.199983	3.15685	0.034	0	1
Zfp983	0.199983	2.69528	0.034	0	1
Mrps34	0.199983	3.02195	0.034	0	1
Rab40c	0.199983	3.3782	0.034	0	1
Mapk14	0.199983	3.86263	0.034	0	1
Wiz	0.199983	2.81745	0.034	0	1
Ppt2	0.199983	3.18822	0.034	0	1
Gabbr1	0.199983	2.81809	0.034	0	1
Slc25a27	0.199983	3.04495	0.034	0	1
Klc4	0.199983	3.26499	0.034	0	1
Zfp119b	0.199983	4.10106	0.034	0	1
Slc25a23	0.199983	3.25673	0.034	0	1
Msh6	0.199983	3.48207	0.034	0	1
Uty	0.199983	3.74427	0.034	0	1
Thoc1	0.199983	3.33724	0.034	0	1
Slc39a6	0.199983	3.11509	0.034	0	1
Mocos	0.199983	3.50237	0.034	0	1
Sap130	0.199983	3.36284	0.034	0	1
Pkd2l2	0.199983	3.49156	0.034	0	1
Pfdn1	0.199983	3.29421	0.034	0	1
Pggt1b	0.199983	3.82968	0.034	0	1
Prrc1	0.199983	3.22006	0.034	0	1
Grpel2	0.199983	3.16398	0.034	0	1
Lman1	0.199983	3.78699	0.034	0	1
Tubb6	0.199983	3.69925	0.034	0	1
Cep192	0.199983	3.22484	0.034	0	1
Rnmt	0.199983	3.0412	0.034	0	1
Mex3c	0.199983	3.37983	0.034	0	1
Coro1b	0.199983	3.33914	0.034	0	1
Znhit2	0.199983	3.23131	0.034	0	1
Ppp2r5b	0.199983	2.99852	0.034	0	1
Men1	0.199983	3.57663	0.034	0	1
Nrxn2	0.199983	2.24401	0.034	0	1
Stip1	0.199983	3.16606	0.034	0	1
Lrrc10b	0.199983	2.20837	0.034	0	1
Ms4a6b	0.199983	2.56117	0.034	0	1
Carnmt1	0.199983	3.25754	0.034	0	1
Mbl2	0.199983	2.23924	0.034	0	1
Fra10ac1	0.199983	3.28714	0.034	0	1
R3hcc1l	0.199983	3.24425	0.034	0	1
Erlin1	0.199983	4.11834	0.034	0	1
Nolc1	0.199983	2.55479	0.034	0	1
Mfsd13a	0.199983	3.74235	0.034	0	1
Gsto2	0.199983	2.36851	0.034	0	1
[truncated: 6,543 more rows]

## Sheet: 3 OECs - male vs female
Gene	p value	Average log2 fold change	Fraction of cells expressing the gene in male cluster	Fraction of cells expressing the gene in female cluster	Adjusted p value
Ddx3y	1.12909e-06	4.88926	0.432	0	0.0246763
Pfdn1	1.26439e-05	1.13975	0.815	0.512	0.276333
Tmem223	1.33357e-05	1.78764	0.741	0.415	0.291452
H3f3b	1.55351e-05	0.603762	0.951	0.854	0.339519
Erlec1	2.17863e-05	2.69423	0.543	0.195	0.476139
Fus	2.36958e-05	1.16207	0.778	0.463	0.517872
Tra2b	2.91805e-05	1.84749	0.654	0.341	0.637739
Ssr2	4.11504e-05	0.996651	0.802	0.488	0.899341
Smc1a	4.37123e-05	1.74981	0.593	0.244	0.955333
mt-Nd4	4.47843e-05	-0.628509	1	1	0.978762
H2bu2	4.83145e-05	1.3801	0.753	0.341	1
Tspan7	4.86543e-05	2.488	0.531	0.171	1
Sfrp5	5.40007e-05	1.76255	0.667	0.317	1
Snu13	7.09409e-05	1.12877	0.79	0.415	1
Eif2s3y	8.32781e-05	4.10457	0.309	0	1
Resf1	9.39387e-05	2.26759	0.494	0.146	1
Selenof	0.000128089	0.693448	0.938	0.756	1
Phlda3	0.000137748	0.969871	0.815	0.512	1
Psmb6	0.000166877	1.03322	0.827	0.512	1
Atxn10	0.000179492	1.49327	0.642	0.317	1
Bmyc	0.000189504	1.07776	0.827	0.585	1
Hnrnpa3	0.000218322	1.15036	0.765	0.463	1
Nfkbia	0.000257266	1.24056	0.802	0.561	1
Mrfap1	0.000259084	0.765688	0.802	0.537	1
Saraf	0.000296252	0.84069	0.852	0.634	1
Eci1	0.000321823	1.5646	0.63	0.317	1
Faf2	0.000329748	2.00825	0.519	0.195	1
Ppp1r14b	0.00034163	1.36656	0.728	0.439	1
Klf9	0.000399209	1.31219	0.716	0.439	1
Ifngr1	0.000413657	1.73521	0.593	0.268	1
Cd63	0.000464111	0.546266	0.914	0.756	1
Hmbs	0.000514193	3.24687	0.37	0.098	1
Mtch1	0.000528715	0.744709	0.877	0.659	1
Pmepa1	0.000529248	0.687747	0.926	0.829	1
Papss1	0.000542671	1.10953	0.728	0.463	1
Lamp2	0.000547061	0.988291	0.79	0.537	1
Tmed7	0.000558976	0.905391	0.642	0.293	1
Erh	0.000559194	1.07732	0.667	0.366	1
Hmgcr	0.000565843	0.620634	0.568	0.268	1
Lpar1	0.000593377	0.768122	0.79	0.537	1
Fez1	0.000600708	0.987756	0.691	0.439	1
Ubxn1	0.000622696	0.636711	0.827	0.537	1
Ube2e1	0.000625129	1.7184	0.519	0.195	1
Trappc13	0.000636485	3.33235	0.346	0.073	1
Pcyt2	0.000665352	1.24625	0.556	0.22	1
Hdgf	0.000682786	0.866827	0.741	0.537	1
Ifitm2	0.00070522	0.757427	0.901	0.756	1
Csrp1	0.00072892	0.856732	0.889	0.683	1
Idi1	0.000776414	1.62794	0.58	0.317	1
Sh3glb1	0.000780172	0.63321	0.753	0.488	1
Nptn	0.00080696	1.42558	0.691	0.39	1
Smox	0.000835927	1.81363	0.543	0.268	1
Herpud1	0.000839234	1.21794	0.765	0.512	1
Sec62	0.00084731	0.705158	0.852	0.683	1
Dbp	0.000896735	1.35007	0.654	0.341	1
Eif3f	0.000933964	1.12929	0.827	0.512	1
H1f2	0.00103013	0.962731	0.691	0.463	1
Arpc5	0.00103616	0.998857	0.765	0.488	1
Gatm	0.00106682	2.37962	0.383	0.098	1
Cp	0.0010759	1.41179	0.63	0.39	1
Ddx60	0.00109825	-2.21074	0.074	0.293	1
Mocs2	0.00111853	0.818614	0.852	0.634	1
Hsd17b11	0.00112067	1.18464	0.667	0.366	1
Selenos	0.00112535	0.924598	0.827	0.585	1
Rps5	0.00116425	-0.607226	0.926	0.902	1
C1d	0.00117171	1.43651	0.543	0.268	1
Tkt	0.00119658	0.709607	0.802	0.512	1
Neurl4	0.0012088	-3.08383	0.049	0.244	1
Leprotl1	0.00122753	0.675496	0.469	0.171	1
Ostf1	0.00124954	0.91213	0.58	0.317	1
Slc22a17	0.00126941	0.836481	0.741	0.439	1
Erg28	0.0012877	1.23961	0.654	0.341	1
Atf4	0.00130974	1.14809	0.556	0.268	1
Dhrs7	0.00132645	1.69696	0.58	0.293	1
Calr	0.00141499	0.757108	0.827	0.585	1
Sdf2l1	0.0014654	2.01027	0.444	0.171	1
Sc5d	0.00150352	1.61054	0.519	0.268	1
Bcl3	0.00150832	-2.26405	0.025	0.195	1
Mboat7	0.00154436	2.73625	0.321	0.073	1
Mbd3	0.00155034	1.34295	0.556	0.293	1
Klf15	0.00157866	2.11673	0.42	0.146	1
Fam49b	0.00161274	2.3456	0.383	0.122	1
Tasor	0.00163224	2.6551	0.37	0.122	1
Ift20	0.00163409	0.945502	0.753	0.488	1
Ppp1r10	0.00166256	1.13063	0.469	0.171	1
Bcar3	0.00167523	1.84445	0.469	0.22	1
Rnf215	0.00169255	0.677548	0.716	0.439	1
Tesc	0.00170049	-1.72699	0.333	0.561	1
mt-Co2	0.00173152	-0.57514	1	1	1
Pcmtd1	0.00173571	1.8421	0.519	0.268	1
Ergic3	0.00173984	0.64814	0.802	0.585	1
Rabac1	0.00175947	0.777541	0.864	0.61	1
Mat2b	0.00176472	1.32697	0.506	0.244	1
Cops5	0.00178457	1.02734	0.481	0.195	1
Pdcd11	0.00179518	2.22615	0.296	0.049	1
Pum2	0.00180137	1.74615	0.506	0.244	1
Tle5	0.00187412	0.655311	0.84	0.512	1
Tomm5	0.00187436	1.25101	0.593	0.341	1
Sucla2	0.00188098	1.26383	0.568	0.293	1
Parl	0.00192721	1.16848	0.506	0.22	1
Triobp	0.00206487	2.5563	0.259	0.024	1
Gstp1	0.0020904	0.707484	0.617	0.366	1
Taf1d	0.00209203	1.8277	0.568	0.268	1
H3f3a	0.00210161	0.452477	0.926	0.805	1
Rras	0.00216653	1.01968	0.617	0.341	1
Srsf7	0.00217703	1.28197	0.704	0.415	1
Araf	0.00229926	1.85931	0.506	0.244	1
Smim10l1	0.00234005	1.33241	0.691	0.415	1
Por	0.00240657	1.63972	0.605	0.366	1
Acadsb	0.00245461	2.15674	0.42	0.171	1
Krt10	0.00246086	1.57425	0.469	0.195	1
Srsf4	0.00246291	2.10162	0.395	0.146	1
Clmn	0.00251724	-1.68281	0.185	0.439	1
Csnk1g2	0.00258516	1.65025	0.481	0.22	1
Prkacb	0.002687	2.23016	0.395	0.146	1
Pdcd2l	0.00272486	1.8939	0.284	0.049	1
1110012L19Rik	0.00280878	1.99681	0.346	0.098	1
Aldh7a1	0.00280906	0.927497	0.667	0.39	1
Vim	0.00281691	0.54171	0.963	0.854	1
Sec22b	0.00286704	1.49766	0.469	0.22	1
Zmiz1	0.00294287	0.854029	0.568	0.293	1
Asrgl1	0.00301713	1.09716	0.765	0.488	1
Gnb2	0.00302743	0.433941	0.914	0.707	1
Pcna	0.00303266	1.62089	0.494	0.244	1
Gcsh	0.00311592	1.211	0.568	0.293	1
Degs1	0.00318358	0.822249	0.765	0.488	1
Ramac	0.00321462	1.355	0.519	0.268	1
Erf	0.00322846	1.64045	0.432	0.146	1
Strap	0.00324858	0.355024	0.679	0.415	1
H2-Q4	0.00326104	0.695577	0.593	0.341	1
Psmd6	0.00326568	0.897497	0.667	0.366	1
Tnrc6c	0.00327741	1.54294	0.519	0.268	1
Galnt11	0.00329394	1.34108	0.346	0.098	1
Hnrnpd	0.00329695	0.937936	0.679	0.39	1
Asb7	0.00332368	-2.4486	0.062	0.244	1
Cpne2	0.00336934	1.70219	0.58	0.341	1
Clta	0.00337216	0.63956	0.802	0.561	1
Evi5	0.00350771	0.987475	0.691	0.463	1
Tulp2	0.00352188	-2.86782	0.025	0.171	1
Xrn2	0.00354299	1.65422	0.568	0.341	1
Ebna1bp2	0.00357832	0.681209	0.593	0.341	1
Rtkn	0.00358064	1.74662	0.457	0.195	1
Fnta	0.00363716	0.684419	0.765	0.561	1
Dnpep	0.00367825	1.16022	0.519	0.268	1
BC005624	0.00386328	1.04	0.593	0.366	1
Sqor	0.00387711	2.11363	0.37	0.146	1
Stx8	0.00397615	1.26154	0.543	0.293	1
Use1	0.0039852	1.09448	0.654	0.39	1
Extl3	0.00398828	-2.29003	0.062	0.244	1
Tmed10	0.00399993	0.343144	0.877	0.659	1
Tubb5	0.00401111	0.834242	0.802	0.512	1
Foxo3	0.0040119	2.91709	0.222	0.024	1
mt-Nd5	0.00403084	-0.732316	0.938	0.927	1
Plin3	0.00411056	1.006	0.679	0.439	1
Phb	0.00417208	2.19025	0.383	0.146	1
Cisd1	0.004184	0.905115	0.679	0.439	1
Psmb8	0.00419469	0.735204	0.802	0.585	1
Arhgdia	0.004224	0.652752	0.679	0.366	1
Emc7	0.00427111	0.554395	0.852	0.61	1
Sf3b6	0.00434193	0.950062	0.827	0.537	1
Rgcc	0.00440948	0.679653	0.815	0.61	1
Stat3	0.0044916	0.27301	0.704	0.463	1
A930004D18Rik	0.00454884	-3.72535	0	0.098	1
Zfp758	0.00454884	-2.85442	0	0.098	1
Pcdhb18	0.00454884	-3.56703	0	0.098	1
Slc9a3r2	0.00454943	1.29129	0.593	0.366	1
Igfbp4	0.00457161	0.665735	0.815	0.561	1
Apmap	0.00457504	3.63507	0.259	0.024	1
H2-M3	0.00459289	2.45969	0.222	0.024	1
Bsg	0.00459968	0.54927	0.901	0.756	1
Rlbp1	0.00473971	2.54002	0.358	0.146	1
Ccnt2	0.00480776	2.22606	0.259	0.049	1
Gpatch8	0.00490244	1.86956	0.457	0.22	1
Pstk	0.00490451	1.94625	0.333	0.098	1
Atp1a1	0.00498658	1.69755	0.667	0.463	1
Msl3l2	0.00501801	2.66592	0.173	0	1
Mcf2l	0.00514628	-1.93094	0.111	0.317	1
Gclm	0.005155	1.84504	0.481	0.268	1
Brd7	0.00520464	1.41991	0.432	0.195	1
Morf4l2	0.00522534	1.15012	0.58	0.341	1
Nck2	0.00534282	2.6617	0.247	0.049	1
2310009A05Rik	0.00534418	0.715857	0.617	0.317	1
Rhoa	0.00538217	0.466495	0.877	0.707	1
Srp72	0.00539099	1.0266	0.556	0.293	1
Scrn1	0.00543095	0.10116	0.704	0.366	1
Carns1	0.00549586	3.99324	0.21	0.024	1
Rhbdd2	0.00564536	1.96136	0.296	0.073	1
Clcn3	0.00576888	1.3207	0.642	0.488	1
Jund	0.00577271	0.488456	0.877	0.732	1
Tcea1	0.00582839	1.10588	0.617	0.39	1
Hacd2	0.00586766	2.20127	0.284	0.073	1
Eif1b	0.0059275	0.623255	0.877	0.683	1
Akap9	0.00594513	1.17374	0.519	0.293	1
Srsf3	0.00607986	0.803459	0.815	0.61	1
Nfia	0.00613188	0.93899	0.667	0.463	1
Zdhhc6	0.00614487	2.32343	0.284	0.073	1
Ccn2	0.00614756	-1.26541	0.222	0.024	1
Zfand6	0.00617967	0.712921	0.741	0.463	1
Dlst	0.0061983	2.12227	0.395	0.171	1
Nudcd2	0.00620145	1.71902	0.432	0.195	1
Sypl	0.00624984	1.8313	0.42	0.195	1
Lman1	0.00629029	1.34023	0.654	0.39	1
Alg5	0.0063439	1.29082	0.543	0.268	1
Acaa2	0.00636441	0.438276	0.827	0.634	1
Adra2c	0.00643031	1.10337	0.444	0.22	1
Map1lc3b	0.00660159	0.426027	0.877	0.634	1
Arl8a	0.0067326	0.847869	0.58	0.317	1
Cib1	0.00680583	1.26161	0.457	0.195	1
Rpl37a	0.00682749	-0.626262	0.914	0.951	1
Gga1	0.00684983	2.78616	0.296	0.098	1
Cyren	0.00688036	-3.31732	0.074	0.244	1
Syap1	0.00689216	0.237214	0.358	0.146	1
Tmem59	0.0068924	0.530895	0.84	0.634	1
March2	0.00702778	0.818647	0.63	0.39	1
Fdps	0.0071216	0.699686	0.728	0.537	1
P4hb	0.00713486	1.08543	0.704	0.439	1
Btf3l4	0.00717584	2.27535	0.247	0.049	1
Zfand5	0.00725537	1.1591	0.568	0.317	1
Mmp17	0.007298	1.09373	0.506	0.293	1
Rbm25	0.00730883	0.598913	0.63	0.341	1
Triqk	0.00736961	1.86877	0.309	0.098	1
Nsdhl	0.00740538	1.44844	0.506	0.268	1
Cyp2j6	0.00741827	0.706089	0.852	0.61	1
Pla2g12a	0.00748282	1.87232	0.383	0.171	1
Fgd4	0.00753108	1.96108	0.247	0.049	1
Ctsf	0.00755683	1.57609	0.395	0.146	1
Gtf2b	0.00757787	1.50052	0.531	0.317	1
Obp2a	0.00758295	-6.362	0	0.073	1
Gal3st1	0.00763023	0.623296	0.765	0.488	1
Set	0.00764845	0.482629	0.765	0.512	1
Ube2n	0.00778891	0.653962	0.765	0.537	1
Gemin7	0.00801246	0.805493	0.457	0.22	1
Ppa1	0.00801246	-0.632126	0.457	0.22	1
Gm11808	0.00802607	-1.45095	0.556	0.683	1
Hsp90b1	0.00808647	0.717812	0.877	0.683	1
Arf4	0.00812342	0.740259	0.753	0.488	1
Flna	0.00815663	1.61535	0.543	0.341	1
Ociad1	0.00817826	0.921439	0.58	0.366	1
Ube2b	0.00818494	1.18903	0.63	0.39	1
Arl3	0.0081971	0.780808	0.778	0.585	1
As3mt	0.00820993	1.0777	0.506	0.244	1
Mt1	0.00825269	0.54583	0.926	0.805	1
Ehd1	0.00825307	1.44364	0.383	0.171	1
Ppp1r15a	0.00833483	0.630563	0.556	0.341	1
Gpd2	0.00836177	1.19859	0.568	0.341	1
Slc25a5	0.00845927	0.814341	0.753	0.585	1
Vps36	0.00846338	1.4907	0.481	0.268	1
Rhobtb2	0.00847474	-2.92197	0.012	0.122	1
Twf1	0.0085452	0.907548	0.556	0.293	1
Jtb	0.00856413	0.753528	0.667	0.415	1
Mknk2	0.00857277	2.84117	0.198	0.024	1
Slc25a16	0.00862895	1.61887	0.284	0.073	1
Phlpp1	0.00869168	2.55226	0.259	0.073	1
Rsbn1l	0.00871454	1.43032	0.481	0.244	1
Vcl	0.00879027	1.07376	0.543	0.293	1
Cd47	0.00879794	0.141985	0.778	0.512	1
Ppp1r7	0.00881268	0.206305	0.395	0.171	1
Mrpl54	0.008899	0.820129	0.63	0.39	1
Coq3	0.00907804	-2.81934	0.037	0.171	1
Nedd8	0.0090982	0.523031	0.84	0.61	1
Synm	0.00915755	1.75777	0.333	0.122	1
Plscr2	0.00917549	0.555588	0.79	0.561	1
Rasa3	0.00934713	0.922828	0.519	0.268	1
Ddit4	0.00936726	1.19099	0.37	0.171	1
Hspa9	0.00938366	0.819608	0.667	0.439	1
Arvcf	0.0094182	0.174276	0.654	0.39	1
Layn	0.0094391	2.33137	0.235	0.049	1
N6amt1	0.00949602	1.49898	0.42	0.195	1
Psmd12	0.00949991	1.30897	0.531	0.317	1
Mrpl13	0.00957187	1.12167	0.605	0.39	1
Csnk2a2	0.0095792	1.93849	0.407	0.195	1
Nudcd3	0.00960416	0.975559	0.593	0.341	1
Tmem17	0.00972326	-3.04659	0.062	0.22	1
Zfyve21	0.00979746	0.620299	0.741	0.463	1
Smim19	0.00989479	0.642624	0.605	0.39	1
Cdv3	0.0100815	2.03199	0.358	0.146	1
Snrpb	0.0100824	0.736006	0.815	0.561	1
Itm2b	0.0101062	0.160038	0.938	0.927	1
Aplp2	0.0101107	0.307244	0.827	0.61	1
S100a4	0.0101369	0.679363	0.815	0.683	1
Rab4a	0.010311	2.19099	0.321	0.122	1
1700025G04Rik	0.0103631	0.425113	0.309	0.098	1
Rpl41	0.0104366	-0.620035	0.963	0.976	1
Ngly1	0.01046	3.0738	0.309	0.122	1
Tmem9	0.0105121	-0.360033	0.37	0.146	1
mt-Cytb	0.0105196	-0.37292	0.988	1	1
H2-T23	0.0105557	1.68304	0.506	0.317	1
Pcbp4	0.0105997	1.16103	0.654	0.463	1
Dip2b	0.0107359	1.00325	0.506	0.293	1
Mrpl14	0.0107991	0.817717	0.63	0.366	1
Psmd10	0.0108048	1.63326	0.309	0.098	1
Acaa1a	0.0108445	0.90273	0.63	0.39	1
Serhl	0.0108589	1.34851	0.395	0.171	1
Smim22	0.0109119	-1.41537	0.074	0.244	1
Fam171a1	0.0109185	-2.59851	0.025	0.146	1
Clec2d	0.0109727	-1.87672	0.049	0.195	1
Mfsd5	0.0111474	2.50893	0.235	0.049	1
Scand1	0.0112005	0.95282	0.753	0.488	1
Psmd7	0.0112724	0.415061	0.802	0.537	1
Klhdc2	0.0112882	0.880568	0.531	0.293	1
Gatad2b	0.0113	1.31509	0.457	0.22	1
Csrnp2	0.0113199	-2.77557	0.025	0.146	1
Gprin3	0.0113528	3.04436	0.185	0.024	1
Tex9	0.0113528	3.43341	0.185	0.024	1
Kdelr2	0.0114064	1.14768	0.605	0.366	1
Mrpl10	0.0114131	2.06065	0.321	0.122	1
Thap12	0.0114848	0.269433	0.506	0.268	1
Hmgn2	0.0114917	0.458758	0.432	0.195	1
Mtch2	0.0115193	0.136402	0.593	0.366	1
Cacybp	0.0115639	0.855441	0.642	0.439	1
Rex1bd	0.0116236	0.745968	0.79	0.585	1
Eif6	0.0117196	0.127728	0.58	0.341	1
Cenpb	0.0117196	0.964598	0.568	0.366	1
Sept5	0.0117344	-1.94958	0.025	0.146	1
Slc9a3r1	0.0117774	0.537045	0.79	0.634	1
Ttc1	0.0118421	1.54599	0.395	0.195	1
Snx1	0.0118453	1.32817	0.531	0.317	1
Lpcat2	0.011854	0.964263	0.654	0.488	1
Cmpk1	0.0119024	0.478173	0.605	0.341	1
Ankra2	0.0119141	0.419031	0.42	0.22	1
Tank	0.0119162	2.21977	0.259	0.073	1
Haus8	0.0119162	1.8429	0.259	0.073	1
Fam133b	0.0119598	1.99244	0.407	0.195	1
Polr2m	0.0120439	0.636638	0.679	0.439	1
Foxd3	0.0122287	0.660211	0.864	0.683	1
Igbp1	0.0122357	1.55804	0.444	0.244	1
Mapk3	0.0122731	0.312684	0.802	0.561	1
Pten	0.0123113	0.720061	0.58	0.341	1
Prxl2a	0.012408	1.19316	0.642	0.415	1
Zfp91.1	0.0124996	1.07351	0.42	0.195	1
Timm23	0.0126809	1.15323	0.617	0.439	1
Emp2	0.0126965	0.549876	0.753	0.488	1
Rgs6	0.012734	-2.14983	0.049	0.195	1
Ric8a	0.0127437	1.74848	0.309	0.098	1
Matn4	0.0128048	0.403248	0.864	0.683	1
Eif2b2	0.0129263	1.76027	0.346	0.146	1
Hmgb3	0.0129769	2.30812	0.222	0.049	1
Grina	0.013097	0.791353	0.753	0.488	1
Hmgn5	0.0132082	2.17677	0.247	0.073	1
Sbds	0.0132234	0.634021	0.63	0.439	1
Exosc3	0.01327	0.557781	0.383	0.171	1
Sec23b	0.0132741	2.52259	0.296	0.122	1
Cct6a	0.0133504	1.34765	0.568	0.341	1
Snx13	0.0133542	2.01222	0.309	0.122	1
Ttc9b	0.0134217	-0.656382	0.037	0.171	1
Il18bp	0.0134217	-1.83002	0.037	0.171	1
Tssc4	0.013433	1.8697	0.346	0.146	1
Rpp30	0.0134699	1.35816	0.37	0.146	1
Rbmx	0.0136631	1.52781	0.333	0.122	1
Rnf126	0.0136929	1.18947	0.346	0.146	1
Slc49a4	0.0137069	1.28284	0.395	0.195	1
Lsm10	0.0137518	2.32976	0.272	0.098	1
Gopc	0.013803	-0.818773	0.074	0.244	1
Xrcc5	0.013808	2.66356	0.247	0.073	1
Hivep2	0.0138228	2.40692	0.284	0.098	1
Grik3	0.013839	1.15749	0.63	0.415	1
Ankmy2	0.0139236	0.84976	0.272	0.073	1
Sri	0.0139671	0.256904	0.716	0.463	1
Flot1	0.0140003	0.940025	0.765	0.561	1
Farp2	0.0140634	1.81468	0.235	0.049	1
Lurap1l	0.0140634	1.36806	0.235	0.049	1
Zfpl1	0.0140675	1.61451	0.395	0.171	1
Myc	0.014106	2.86825	0.136	0	1
Rfc4	0.014106	2.46139	0.136	0	1
Brd2	0.0141412	0.306464	0.605	0.39	1
Sept7	0.0141933	0.160846	0.84	0.659	1
Ypel3	0.0142818	0.449638	0.852	0.585	1
Taf13	0.0143178	0.584601	0.753	0.561	1
Metap2	0.0144019	0.612453	0.815	0.561	1
Oat	0.0144097	0.544549	0.852	0.634	1
Emc6	0.0144379	0.136944	0.642	0.439	1
Dcaf12l1	0.0145031	-3.53869	0	0.073	1
Cdkl5	0.0145031	-2.90625	0	0.073	1
Trim45	0.0145031	-1.95066	0	0.073	1
Cnksr1	0.0145031	-2.83915	0	0.073	1
Plin1	0.0145031	-3.55779	0	0.073	1
Adat2	0.0145031	-3.21237	0	0.073	1
Atp5b	0.0145466	0.291508	0.889	0.683	1
Ncam1	0.0146565	0.63074	0.877	0.707	1
Tlr2	0.0147437	-2.63853	0.062	0.22	1
Sptlc2	0.0147503	1.3737	0.37	0.171	1
Parn	0.0147527	2.36929	0.247	0.073	1
Erbb3	0.0148132	0.500127	0.741	0.512	1
Pfdn5	0.0148141	-0.579423	0.889	0.805	1
Tpgs1	0.0149836	0.946325	0.531	0.293	1
Mrps18a	0.0149836	0.387729	0.519	0.317	1
Trim44	0.0151405	1.20367	0.457	0.268	1
Morf4l1	0.0151425	0.195694	0.889	0.707	1
Haghl	0.0151523	-0.111074	0.568	0.293	1
Hspa5	0.01521	0.439173	0.926	0.683	1
Gata2	0.0153378	0.526942	0.444	0.22	1
Smarcd1	0.0153945	0.858297	0.519	0.293	1
Ncln	0.0154138	2.71265	0.247	0.073	1
Trappc8	0.0154344	2.14351	0.21	0.049	1
Bach1	0.0154518	0.860026	0.432	0.22	1
Lonp2	0.0156004	1.22203	0.444	0.244	1
Mcmbp	0.0156487	1.13243	0.383	0.171	1
Eepd1	0.0156636	1.58646	0.407	0.195	1
Pbxip1	0.0158111	0.376473	0.506	0.268	1
Cct2	0.0158512	0.428724	0.642	0.439	1
H1f10	0.0159367	1.57489	0.346	0.146	1
Ebpl	0.0159657	1.73008	0.383	0.195	1
Aco1	0.0159684	2.13996	0.309	0.122	1
Ccdc47	0.0159692	0.474302	0.691	0.488	1
Rida	0.015994	0.341119	0.481	0.244	1
Yrdc	0.0160079	0.755924	0.222	0.049	1
Pnkd	0.0160457	0.983222	0.58	0.366	1
Mtdh	0.016101	0.172423	0.802	0.61	1
Mif	0.01619	0.543336	0.864	0.634	1
Nde1	0.0163088	0.785318	0.481	0.268	1
Mlec	0.016382	0.775751	0.543	0.317	1
Tubb4b	0.0164144	0.882985	0.778	0.561	1
Ppp1r18	0.0164289	0.571066	0.444	0.22	1
Ppp2r2a	0.0164596	1.23712	0.531	0.317	1
Nckap1	0.0165379	0.866362	0.469	0.268	1
Mcat	0.0165635	2.24923	0.21	0.049	1
Kras	0.0165851	0.995407	0.556	0.366	1
Hnrnpr	0.0165989	1.03671	0.506	0.293	1
Rcc2	0.0166062	1.15171	0.494	0.268	1
Ybx1	0.0166789	0.555336	0.84	0.683	1
Jpt1	0.0167307	0.37493	0.679	0.366	1
Klf2	0.0167916	1.22281	0.519	0.317	1
Lrrcc1	0.0168146	2.18193	0.247	0.073	1
Tenm3	0.0168231	0.98747	0.58	0.366	1
Col11a1	0.0168625	0.887499	0.852	0.683	1
Npc1	0.016872	0.689245	0.519	0.268	1
Tmem47	0.0169201	0.684716	0.642	0.366	1
H2-D1	0.0169849	0.450345	0.938	0.756	1
Golga7	0.0171837	0.759354	0.63	0.39	1
Hnrnpdl	0.0172703	0.827325	0.617	0.39	1
Ywhab	0.0172866	0.244626	0.802	0.537	1
Fuca1	0.0172988	0.719524	0.778	0.537	1
Cuedc1	0.0173233	2.34001	0.284	0.098	1
Tm9sf4	0.0174071	0.972358	0.407	0.195	1
Eif4b	0.0174319	1.06609	0.432	0.22	1
Izumo4	0.0174979	1.84951	0.346	0.146	1
Pdha1	0.0175022	0.648945	0.543	0.341	1
Tvp23b	0.0175022	0.939256	0.543	0.341	1
Rcn1	0.0175057	0.308297	0.79	0.61	1
Fign	0.0175443	0.397852	0.605	0.366	1
Cfl1	0.017627	0.421936	0.827	0.732	1
Cryzl2	0.0177184	0.475179	0.457	0.22	1
Zhx1	0.0177684	1.30519	0.383	0.195	1
Vps29	0.0178925	0.942787	0.617	0.439	1
Slc26a2	0.0179051	-1.33038	0.086	0.244	1
Rhoq	0.0179373	1.75379	0.247	0.073	1
Rps10	0.0179986	-0.550254	0.815	0.805	1
Tpm3	0.0180234	1.07288	0.642	0.512	1
Matn2	0.0180912	0.542881	0.901	0.683	1
Rsf1	0.0181254	1.70052	0.444	0.268	1
Gsta4	0.0181696	0.601338	0.605	0.39	1
Kpna3	0.0181815	1.80404	0.21	0.049	1
Ddrgk1	0.0181903	1.00933	0.778	0.61	1
Ankrd12	0.0182092	0.696888	0.531	0.366	1
Atp1b2	0.0182113	0.537631	0.877	0.659	1
Nup214	0.0182212	2.72758	0.235	0.073	1
Drap1	0.0182311	0.42642	0.815	0.61	1
Rdx	0.0183585	0.587725	0.765	0.561	1
Klf7	0.018372	1.3535	0.543	0.366	1
Odc1	0.0184691	0.755395	0.494	0.293	1
Ank	0.0184714	2.09856	0.333	0.146	1
Dtd1	0.0184784	1.4205	0.444	0.244	1
Ninj1	0.0184944	0.925971	0.679	0.488	1
Psmc4	0.0185786	0.95569	0.58	0.39	1
Pfkl	0.0185786	0.589947	0.58	0.39	1
Eif4h	0.0186104	0.76854	0.642	0.415	1
Sptssa	0.0186179	0.468894	0.741	0.561	1
Anp32b	0.0187741	0.773601	0.679	0.488	1
Rbbp6	0.0187883	0.359253	0.531	0.293	1
Rnf41	0.0187951	-1.51979	0.086	0.244	1
Acss2	0.0188247	-0.517203	0.358	0.146	1
Trp53rka	0.0190412	2.63166	0.21	0.049	1
Ppp1ca	0.0190575	0.383619	0.691	0.463	1
Selenow	0.0190731	-0.726889	0.877	0.854	1
Mt2	0.0191322	1.12467	0.605	0.439	1
Rpl28	0.0191514	-0.589179	0.926	0.854	1
Nfkbil1	0.0191564	1.32767	0.284	0.098	1
1110038F14Rik	0.0192567	0.804795	0.556	0.341	1
Jun	0.019308	0.498983	0.877	0.659	1
Coprs	0.0193605	1.19589	0.37	0.171	1
Dlg4	0.0194144	2.17433	0.173	0.024	1
Mrps12	0.0194159	0.71673	0.753	0.488	1
Dr1	0.0194842	1.78176	0.21	0.049	1
Aars	0.0195428	1.81002	0.272	0.098	1
Dicer1	0.0195428	-0.548993	0.272	0.098	1
Pank3	0.0195636	1.34454	0.407	0.22	1
Mbnl2	0.0196232	0.667095	0.741	0.463	1
Zranb1	0.0196543	1.49706	0.395	0.22	1
Ankrd16	0.0198082	4.25896	0.123	0	1
Tctn1	0.0198082	2.93204	0.123	0	1
Zfp444	0.0198082	2.88598	0.123	0	1
Zfp84	0.0198082	3.0144	0.123	0	1
Pck2	0.0198082	2.73291	0.123	0	1
Mroh1	0.0198082	2.5764	0.123	0	1
Abcc1	0.0198082	3.08431	0.123	0	1
Gtpbp8	0.0198082	2.5775	0.123	0	1
9130008F23Rik	0.0198082	2.59232	0.123	0	1
Rbm18	0.0198956	0.199291	0.346	0.122	1
1110065P20Rik	0.0202856	0.478076	0.63	0.366	1
Ppp1r12c	0.0202924	2.54469	0.259	0.098	1
Micu2	0.0203477	1.93748	0.272	0.098	1
Xpnpep1	0.020459	1.2256	0.42	0.22	1
Ubxn6	0.0204668	0.671934	0.568	0.366	1
Rrm2b	0.0205922	1.90695	0.321	0.146	1
Smndc1	0.0206429	1.44708	0.333	0.146	1
Rilpl1	0.0206631	1.20502	0.296	0.098	1
Nop53	0.0207687	0.152113	0.457	0.268	1
Lifr	0.0207687	0.889522	0.457	0.268	1
Exoc3	0.0208206	1.62569	0.457	0.293	1
Puf60	0.0208511	-0.31652	0.617	0.366	1
Eif2b1	0.0208678	1.47568	0.21	0.049	1
Ilf2	0.0209306	0.966366	0.309	0.122	1
Clic1	0.0210452	0.40403	0.815	0.634	1
Sf3a3	0.021049	0.118288	0.407	0.195	1
Mboat2	0.0211203	0.474966	0.877	0.683	1
Mag	0.0212601	0.397713	0.778	0.537	1
Rlim	0.0213328	1.87977	0.296	0.122	1
Vps8	0.0215853	2.64512	0.198	0.049	1
Bloc1s2	0.0216791	1.36323	0.321	0.122	1
Sumo3	0.0217677	0.732771	0.543	0.317	1
Ier3	0.0218897	0.953134	0.654	0.488	1
Trappc6b	0.0219571	0.893356	0.556	0.366	1
Sgta	0.0219633	0.57562	0.63	0.463	1
App	0.0220009	0.502213	0.951	0.683	1
Gdpd1	0.0220067	2.48909	0.284	0.098	1
P2rx4	0.0220688	0.739044	0.432	0.22	1
Cstf2	0.0220909	2.79006	0.198	0.049	1
Atf7	0.022119	2.17628	0.235	0.073	1
Ubqln4	0.0222059	-1.54711	0.111	0.268	1
Pdzd4	0.0222218	-1.94633	0.086	0.244	1
Ss18l2	0.0222916	0.598193	0.63	0.439	1
Tusc3	0.0222956	1.08415	0.556	0.366	1
Shisa5	0.0224095	2.49428	0.469	0.293	1
Rnf8	0.0224525	1.57682	0.222	0.049	1
Dym	0.0226068	-2.12213	0.099	0.244	1
Zfp710	0.0226073	-2.9641	0.049	0.171	1
Vwc2	0.0226251	0.858249	0.63	0.439	1
Gpm6a	0.0226396	1.3619	0.358	0.171	1
Ndfip2	0.0227237	0.624892	0.728	0.488	1
Mia3	0.0227592	0.997724	0.519	0.341	1
Wdcp	0.022783	-2.93302	0.062	0.195	1
Anp32e	0.0228013	0.830815	0.531	0.341	1
Txnrd2	0.0228347	-2.5028	0.123	0.293	1
Cdc42ep3	0.0229129	1.01476	0.407	0.195	1
Brix1	0.0229248	0.949161	0.321	0.122	1
Ece1	0.0230534	1.18363	0.617	0.39	1
Gadd45a	0.0230791	2.45901	0.16	0.024	1
Tlnrd1	0.0230791	3.16531	0.16	0.024	1
Jrkl	0.0230791	2.40985	0.16	0.024	1
Vcpkmt	0.0230791	2.99257	0.16	0.024	1
Erc1	0.0231331	2.38387	0.198	0.049	1
Ctf1	0.0231331	2.74224	0.198	0.049	1
Mosmo	0.0232073	0.90252	0.395	0.195	1
Cd2ap	0.0232797	0.966964	0.481	0.317	1
Tox	0.0233643	0.161719	0.21	0.049	1
Pon2	0.023505	0.198362	0.704	0.512	1
1110032A03Rik	0.0235162	0.971505	0.568	0.341	1
Ssr4	0.0235439	0.297921	0.864	0.659	1
Psmd11	0.0236153	0.788668	0.617	0.415	1
F8a	0.0236771	2.40451	0.16	0.024	1
Pdzrn3	0.0237218	-2.50996	0.111	0.268	1
Dnajc3	0.0237625	0.456979	0.79	0.61	1
Gsdme	0.0238523	1.01332	0.346	0.146	1
Eif2b3	0.0238896	2.48444	0.284	0.122	1
Hcn2	0.0238936	1.1395	0.21	0.049	1
Aph1a	0.0238952	0.993625	0.556	0.341	1
Eif3h	0.0240204	0.384139	0.802	0.512	1
Reep1	0.0240428	-5.58433	0.012	0.098	1
Urb1	0.0240428	-2.82933	0.012	0.098	1
Yif1b	0.0240587	0.879047	0.481	0.293	1
Ech1	0.0241713	0.614646	0.778	0.585	1
Ndufa2	0.0243574	-0.692931	0.802	0.829	1
Alyref	0.0244308	0.558116	0.593	0.366	1
Msrb1	0.0244308	0.77543	0.593	0.366	1
March5	0.0244547	1.04414	0.481	0.268	1
Dnajb6	0.0244799	0.398801	0.691	0.463	1
Pdia4	0.0244877	0.623559	0.79	0.585	1
Hnrnpa2b1	0.0244884	0.569203	0.852	0.659	1
Ppfia2	0.0246596	-1.64983	0.062	0.195	1
Pibf1	0.0247764	3.10841	0.198	0.049	1
Nr2c1	0.0247764	-1.78457	0.099	0.244	1
Dcaf8	0.0249202	0.942137	0.432	0.244	1
Itih5	0.0249385	1.12302	0.556	0.39	1
Tcea3	0.0250478	-5.19417	0.012	0.098	1
Nsun5	0.0250478	-2.69269	0.012	0.098	1
Ppm1h	0.0250478	-3.21901	0.012	0.098	1
9930111J21Rik2	0.0250478	-2.61333	0.012	0.098	1
Rfx2	0.0250478	-3.83438	0.012	0.098	1
Zfp330	0.0252004	1.69078	0.321	0.146	1
Dnajc5	0.0253274	0.958881	0.432	0.244	1
Echs1	0.0253366	0.379402	0.654	0.488	1
Gjc3	0.0253865	1.09464	0.654	0.463	1
Ptpn1	0.025391	1.27822	0.37	0.195	1
Mapk1ip1l	0.0255391	2.85969	0.222	0.073	1
Jmjd8	0.0255519	-0.846421	0.074	0.22	1
Mkks	0.0255524	1.86311	0.16	0.024	1
Crlf2	0.0255524	2.55197	0.16	0.024	1
Matr3	0.0256365	0.861356	0.605	0.366	1
Rplp2	0.0256542	-0.410373	0.938	0.829	1
Rsu1	0.0257572	0.588077	0.654	0.463	1
Ppp3ca	0.0258696	0.607411	0.741	0.463	1
Rbp1	0.0258947	1.92072	0.383	0.22	1
Utp23	0.0259023	-0.973879	0.123	0.293	1
Atf5	0.0259903	-0.760444	0.235	0.439	1
Anxa5	0.0260662	0.224504	0.901	0.78	1
Ampd3	0.0260889	-2.47214	0.012	0.098	1
Ankrd29	0.0260889	-3.51513	0.012	0.098	1
Tnc	0.0261524	-2.09696	0.136	0.293	1
Olfml3	0.0262725	1.81992	0.296	0.122	1
Unc80	0.0263186	1.74835	0.272	0.098	1
Tpm4	0.0263706	1.02674	0.531	0.366	1
Borcs6	0.0264539	1.25219	0.407	0.22	1
Ccdc22	0.0265199	1.90781	0.198	0.049	1
Eif4ebp1	0.0265643	-0.763361	0.136	0.317	1
Csnk1e	0.026578	0.875051	0.494	0.293	1
Mpc1	0.0268717	0.253838	0.84	0.756	1
Chchd7	0.0268836	1.71202	0.346	0.171	1
Chd7	0.0268836	1.98941	0.346	0.171	1
Copa	0.0269587	0.972515	0.543	0.366	1
Tspyl3	0.0271672	-1.8441	0.012	0.098	1
Slc25a30	0.0271672	-2.09321	0.012	0.098	1
Rnf145	0.0272232	1.79174	0.383	0.22	1
Ppp3cc	0.0272928	1.52067	0.21	0.049	1
Cuta	0.0272969	0.776327	0.728	0.561	1
Ahcyl1	0.0273485	1.37018	0.444	0.244	1
Dpp9	0.0273602	1.23735	0.272	0.098	1
1700088E04Rik	0.0273691	-1.39346	0.062	0.195	1
G0s2	0.0273734	0.686727	0.531	0.341	1
Pgm3	0.0273737	2.29583	0.247	0.098	1
Wbp4	0.0273939	1.00758	0.593	0.39	1
Arntl	0.0274263	-3.09711	0.025	0.122	1
Tbc1d9	0.0274263	-2.27002	0.025	0.122	1
Znrf3	0.0274263	-4.81925	0.025	0.122	1
Nrn1l	0.0275453	-3.27062	0.037	0.122	1
Zcrb1	0.0277475	0.177064	0.667	0.488	1
Acad9	0.0277551	1.96244	0.272	0.122	1
Slc27a4	0.0277698	2.20732	0.111	0	1
Entpd6	0.0277698	2.47549	0.111	0	1
Fam220a.1	0.0277698	2.82398	0.111	0	1
Ebf3	0.0277698	2.16985	0.111	0	1
Polrmt	0.0277698	2.04739	0.111	0	1
Ap5m1	0.0277698	2.40616	0.111	0	1
Riok2	0.0277698	2.26635	0.111	0	1
Nfya	0.0277698	2.28729	0.111	0	1
Txnip	0.027906	1.27562	0.358	0.195	1
Nme1	0.02804	0.854443	0.691	0.512	1
Nrbp2	0.0281572	0.677066	0.617	0.415	1
Ptov1	0.0282311	0.327332	0.778	0.585	1
Tango6	0.0282838	-1.63278	0.012	0.098	1
Vegfb	0.0283265	0.953076	0.568	0.415	1
B9d1	0.0283418	1.00642	0.432	0.244	1
Khdc4	0.0283684	1.92938	0.198	0.049	1
Net1	0.0283684	1.66317	0.198	0.049	1
Tead1	0.0283897	0.934995	0.506	0.293	1
Slain2	0.028431	1.9664	0.235	0.073	1
Fam89a	0.0285493	0.902773	0.481	0.293	1
Aldoa	0.0286572	0.371272	0.827	0.634	1
Ppia	0.0287339	0.182087	0.963	0.927	1
Mdm4	0.0288294	1.25282	0.284	0.098	1
Nectin3	0.0289455	-1.66289	0.136	0.293	1
Ptprz1	0.0289753	1.25579	0.704	0.537	1
Msmo1	0.0293092	0.273014	0.654	0.463	1
Spr	0.0293227	0.783014	0.593	0.415	1
Tspan18	0.0293852	0.743606	0.691	0.561	1
Cpq	0.0294845	0.423942	0.679	0.488	1
Zmiz2	0.0295952	2.70581	0.222	0.073	1
Scyl1	0.0296519	1.37555	0.407	0.22	1
Hsf2	0.0296615	-1.97135	0.099	0.244	1
Tm2d2	0.0296615	0.516912	0.654	0.488	1
Zcchc24	0.0297039	0.62521	0.593	0.341	1
Lmna	0.0298001	0.450005	0.716	0.512	1
Nab1	0.029859	1.64734	0.358	0.195	1
Clasp1	0.0298728	1.30934	0.395	0.22	1
Mlycd	0.0299065	0.558498	0.296	0.122	1
Sema3f	0.0299375	-1.81482	0.049	0.171	1
Ptp4a2	0.0299405	0.828692	0.667	0.439	1
Cited2	0.0299611	1.71652	0.284	0.122	1
Zfand1	0.0300428	2.30408	0.185	0.049	1
Chchd3	0.0303045	-0.583498	0.568	0.341	1
Rnf114	0.0303268	1.30404	0.198	0.049	1
Wars	0.0303317	-3.02133	0.062	0.195	1
Ufl1	0.0305598	1.28892	0.37	0.195	1
Igsf11	0.0306247	1.27023	0.481	0.341	1
Spint2	0.0306615	-0.537134	0.062	0.171	1
Tsc22d3	0.0308572	0.666079	0.457	0.244	1
Rnf14	0.0308585	1.55518	0.346	0.171	1
Lgals3	0.0309983	0.809321	0.58	0.415	1
Wrn	0.031005	1.47453	0.198	0.049	1
Asah1	0.0310185	0.279734	0.654	0.463	1
Osbpl1a	0.0310295	0.647304	0.568	0.39	1
Kbtbd2	0.031086	1.85524	0.272	0.122	1
Btbd10	0.0311582	1.96007	0.296	0.146	1
Bfsp2	0.0313434	-1.28594	0.037	0.146	1
Acbd7	0.0313613	-1.96932	0.136	0.293	1
Zfp39	0.0314284	-1.53092	0.025	0.122	1
Aqr	0.0317023	1.87634	0.321	0.171	1
Il18	0.0320217	0.466254	0.259	0.098	1
Serinc3	0.0320581	0.368313	0.753	0.537	1
Ppp4r3a	0.0321529	2.42721	0.222	0.073	1
Cops7a	0.0321607	1.22912	0.432	0.244	1
Ube2a	0.0322388	1.07813	0.519	0.366	1
Usp34	0.0323534	1.36604	0.407	0.244	1
Atp5e	0.0324177	-0.408805	0.938	0.829	1
Acat2	0.0324646	1.00572	0.37	0.171	1
Tmsb4x	0.0324735	-0.662107	0.877	0.927	1
Cdkl2	0.0325014	-1.75517	0.049	0.171	1
Tuba1c	0.0325039	-1.58222	0.025	0.122	1
Dut	0.0326424	-0.845452	0.148	0.317	1
Ppp2ca	0.032716	0.197319	0.704	0.488	1
Lrrfip1	0.0327308	3.16484	0.148	0.024	1
Optn	0.0327308	2.62734	0.148	0.024	1
Casp3	0.0327308	3.11458	0.148	0.024	1
Abhd2	0.0328145	2.23666	0.198	0.024	1
2300009A05Rik	0.0328211	2.0511	0.222	0.073	1
Ralb	0.0328823	2.28112	0.185	0.049	1
Dap	0.0330084	1.138	0.37	0.171	1
Mbtps1	0.0330285	1.24502	0.346	0.171	1
Sertad1	0.0332787	0.823476	0.432	0.268	1
Pafah1b1	0.0333263	0.713871	0.667	0.488	1
Cers2	0.0333495	0.680014	0.716	0.537	1
Kif2a	0.0334733	1.81855	0.296	0.146	1
March8	0.0334844	1.33568	0.321	0.146	1
Cmtm7	0.0335012	2.49135	0.222	0.073	1
Rassf8	0.0335012	-1.42355	0.123	0.268	1
Heyl	0.0335657	3.13274	0.148	0.024	1
Sp2	0.0335657	2.43585	0.148	0.024	1
Rab7	0.0335797	0.498973	0.728	0.512	1
Gpm6b	0.0337079	0.396468	0.914	0.829	1
Bmpr2	0.0337087	1.66141	0.407	0.22	1
Slc4a4	0.0337662	0.564915	0.716	0.512	1
Ahcyl2	0.0339082	-0.826796	0.506	0.634	1
Mrpl32	0.0339246	1.29012	0.407	0.244	1
Ppic	0.0339632	1.16663	0.444	0.195	1
Ctdsp2	0.0339785	0.345511	0.667	0.439	1
Cmip	0.0339854	1.93034	0.247	0.098	1
Gtf2e2	0.0341184	1.81395	0.272	0.122	1
Tmx3	0.0341606	0.276028	0.543	0.341	1
Rab20	0.0341679	0.843341	0.358	0.171	1
Rbbp5	0.0344189	1.92076	0.148	0.024	1
Ints2	0.0344189	2.59911	0.148	0.024	1
Ap4s1	0.034593	1.3059	0.469	0.293	1
Ahi1	0.0346835	0.58496	0.519	0.341	1
Nit1	0.0347121	2.12487	0.309	0.146	1
Eif4a1	0.0347473	0.381114	0.765	0.585	1
Dhcr7	0.0348215	0.613159	0.235	0.073	1
Akap7	0.0348977	1.58367	0.222	0.073	1
Dynlrb1	0.0349015	0.593114	0.827	0.585	1
Cdk9	0.034989	1.75583	0.383	0.195	1
Wdr18	0.0351551	0.39859	0.321	0.171	1
Lrrfip2	0.0351551	1.69771	0.321	0.171	1
Pdrg1	0.0351922	0.78758	0.531	0.341	1
Slc1a2	0.035207	1.33702	0.296	0.122	1
Nfic	0.0352226	0.23858	0.827	0.561	1
Rer1	0.0352293	0.382111	0.716	0.537	1
Ufsp2	0.0352625	1.41922	0.358	0.195	1
Sbsn	0.0352905	1.98502	0.148	0.024	1
Dnajb9	0.0353069	0.839475	0.432	0.244	1
Tcta	0.0353645	-1.26462	0.16	0.317	1
Phax	0.0355014	0.589616	0.593	0.39	1
Tmem106b	0.0355675	0.955842	0.58	0.366	1
Wdr1	0.0356716	1.09175	0.568	0.415	1
Prps1	0.0358741	1.47602	0.333	0.171	1
Pcca	0.0359026	0.390486	0.259	0.098	1
Agpat5	0.0359091	0.669525	0.407	0.22	1
Rassf2	0.0359235	2.0056	0.333	0.195	1
Scg3	0.0359386	0.870604	0.691	0.488	1
Irf2bp2	0.0359468	1.87721	0.309	0.146	1
Kdm3b	0.0359486	2.12199	0.185	0.049	1
Cnn3	0.0359507	0.293823	0.877	0.732	1
Smim8	0.0359701	0.49986	0.531	0.317	1
Msh2	0.0361808	1.74558	0.148	0.024	1
Taf15	0.0362181	0.921531	0.444	0.244	1
Psat1	0.0363297	0.622476	0.679	0.488	1
Ctnnbip1	0.036434	0.680628	0.691	0.488	1
Keap1	0.036438	1.49732	0.358	0.195	1
Tmed5	0.0365185	1.01944	0.457	0.293	1
Wdr83	0.0365869	1.48323	0.259	0.098	1
Akirin2	0.0366884	0.682892	0.42	0.22	1
Tcaim	0.0367522	2.24731	0.185	0.049	1
mt-Atp6	0.0369134	-0.412822	1	1	1
Tmem199	0.0369632	-0.240025	0.235	0.073	1
Orc4	0.0370854	0.780366	0.222	0.073	1
Dhx29	0.0370854	1.25183	0.222	0.073	1
Smdt1	0.0371019	-0.906257	0.852	0.854	1
Rsl1d1	0.0371545	0.383784	0.506	0.293	1
Appl1	0.0372045	1.35092	0.37	0.195	1
Tmco3	0.0372635	0.113268	0.42	0.22	1
Ensa	0.0372798	0.872709	0.469	0.293	1
Tbrg1	0.0373375	0.51683	0.691	0.463	1
Smc3	0.0374015	0.564379	0.605	0.439	1
Retreg1	0.0376491	0.550347	0.593	0.439	1
Ndufv2	0.0378602	0.804689	0.704	0.512	1
Parp14	0.0379175	0.412336	0.383	0.195	1
Tmbim4	0.0379869	0.95449	0.679	0.463	1
Dyrk1a	0.0379911	-0.115284	0.284	0.122	1
Tecr	0.0382672	0.50309	0.864	0.707	1
Snapc2	0.0384053	1.63247	0.185	0.049	1
Tap2	0.0384101	0.60087	0.593	0.415	1
Kif1b	0.0386365	0.333855	0.716	0.488	1
Stt3a	0.038712	1.21818	0.432	0.244	1
Ndrg2	0.0387457	0.181401	0.889	0.732	1
Bmp2k	0.0387987	2.01776	0.259	0.122	1
Ints7	0.0388956	1.56954	0.099	0	1
Ddb2	0.0388956	3.68817	0.099	0	1
Dtwd1	0.0388956	1.93992	0.099	0	1
3300002I08Rik	0.0388956	2.72961	0.099	0	1
Fgd1	0.0388956	3.29413	0.099	0	1
Etfbkmt	0.0388956	2.4261	0.099	0	1
Plekhf1	0.0388956	3.74405	0.099	0	1
Zfp592	0.0388956	2.54047	0.099	0	1
Ap3b2	0.0388956	1.72596	0.099	0	1
Usp35	0.0388956	1.87121	0.099	0	1
Dcun1d2	0.0388956	2.20197	0.099	0	1
Atxn1	0.0388956	4.71487	0.099	0	1
Sfxn4	0.0388956	3.78925	0.099	0	1
Sqle	0.0389332	0.981428	0.494	0.366	1
Fnip2	0.0389676	1.72503	0.148	0.024	1
Oxld1	0.0389676	1.92448	0.148	0.024	1
H1f4	0.0389676	2.17909	0.148	0.024	1
Ap1s1	0.0391984	1.54631	0.309	0.146	1
Fh1	0.0392645	0.633196	0.481	0.268	1
Ddx21	0.0393761	1.39216	0.284	0.122	1
Fbxo3	0.0395072	1.10867	0.519	0.341	1
Gabra1	0.0395553	0.993643	0.469	0.293	1
Gatd1	0.0396123	1.46829	0.247	0.098	1
Lmbrd1	0.039692	0.882537	0.568	0.366	1
Nsfl1c	0.0398169	0.646714	0.58	0.366	1
Mrpl21	0.0399641	0.843345	0.494	0.317	1
Lyplal1	0.0401213	1.7311	0.185	0.049	1
Ripk2	0.0401213	2.14718	0.185	0.049	1
Spcs3	0.0401286	0.766292	0.383	0.22	1
Mgme1	0.0401776	2.24323	0.259	0.098	1
Vcpip1	0.0402155	1.49959	0.272	0.122	1
Fgfrl1	0.0402261	2.2324	0.21	0.073	1
Plscr4	0.0402494	0.596613	0.642	0.439	1
Snrpb2	0.0402558	1.46084	0.407	0.244	1
Ube2s	0.0403416	0.638379	0.617	0.439	1
Pofut1	0.0403683	1.86461	0.247	0.098	1
Mindy2	0.0403772	0.88088	0.556	0.415	1
Zdhhc3	0.0404091	1.21644	0.407	0.268	1
Gpr37l1	0.0404275	0.394626	0.889	0.78	1
Bccip	0.0405167	0.982904	0.42	0.268	1
Irak1	0.0407421	1.32767	0.481	0.317	1
Nedd9	0.0408185	1.41194	0.358	0.195	1
Sgcd	0.0408782	1.40337	0.407	0.244	1
Amd1	0.0409645	1.11785	0.37	0.195	1
Dmap1	0.0410034	1.65257	0.185	0.049	1
Pi4ka	0.0410037	1.31594	0.333	0.171	1
Numb	0.0412135	1.10248	0.444	0.268	1
Prkaca	0.0413116	0.141798	0.407	0.22	1
Hnrnpu	0.0413609	0.509053	0.667	0.39	1
Cops6	0.0414858	0.176881	0.667	0.488	1
Csnk1g3	0.0418356	0.175051	0.321	0.146	1
Ednrb	0.0419172	2.0715	0.247	0.098	1
Mpc2	0.0419519	0.352461	0.852	0.61	1
1700021F05Rik	0.0419765	-0.859439	0.309	0.146	1
G6pc3	0.0420588	0.776535	0.383	0.22	1
Mrps10	0.0421492	1.80191	0.358	0.195	1
Pdzd2	0.0421492	1.92101	0.346	0.22	1
Eif3k	0.0424363	-0.611067	0.753	0.707	1
Slc35b4	0.0425511	3.54891	0.173	0.049	1
Lrrc75a	0.0425511	2.75383	0.173	0.049	1
Arl6ip5	0.0425634	0.928332	0.556	0.39	1
Hmgb1	0.0425988	0.315502	0.877	0.707	1
Dnajc10	0.0426143	1.70775	0.42	0.244	1
Arf5	0.0428113	0.600436	0.79	0.61	1
Manf	0.0428113	0.409462	0.778	0.634	1
Actg1	0.0428162	0.405291	0.864	0.805	1
Uba2	0.0428324	0.577843	0.556	0.341	1
Rapgef1	0.0429652	1.64132	0.148	0.024	1
Brpf3	0.0429652	1.08614	0.148	0.024	1
Fam98c	0.0432085	1.9444	0.272	0.122	1
Naa35	0.0432085	1.40208	0.272	0.122	1
Papola	0.0432628	0.690105	0.42	0.244	1
Pin4	0.0434348	0.847359	0.556	0.341	1
Ppp1r21	0.0435028	2.70244	0.173	0.049	1
Actl6a	0.0435054	0.731303	0.296	0.122	1
Mpp5	0.0435161	1.4796	0.247	0.098	1
Kcna1	0.043629	0.574325	0.852	0.61	1
Rnf220	0.0437661	0.651536	0.346	0.171	1
Cdc16	0.0437934	1.32076	0.333	0.171	1
Rab8a	0.0437934	1.35417	0.333	0.171	1
Asl	0.0439856	-2.10702	0.173	0.317	1
Fbxo32	0.0440171	-0.356556	0.148	0.024	1
Kdm4b	0.0440171	0.727377	0.148	0.024	1
Xylt1	0.0441098	-0.363232	0.494	0.293	1
Tm4sf1	0.0441679	1.15964	0.309	0.146	1
Sf3b3	0.0442604	-1.37352	0.198	0.341	1
Gpcpd1	0.0443615	1.72343	0.222	0.073	1
Gm14295	0.0446978	1.64473	0.185	0.049	1
Gar1	0.0447743	1.44783	0.272	0.122	1
Larp7	0.0447856	1.25774	0.407	0.244	1
Pgrmc1	0.0448523	0.912914	0.617	0.488	1
Rpl3	0.0449669	0.401997	0.914	0.78	1
Erlin2	0.0450225	1.83402	0.296	0.146	1
Ubap2l	0.0450466	1.90993	0.432	0.268	1
Fech	0.0450942	0.55656	0.358	0.171	1
Nop9	0.0452398	1.49436	0.222	0.073	1
Yaf2	0.0452583	0.964464	0.42	0.244	1
Med10	0.0452694	1.0909	0.469	0.317	1
Ccs	0.0454764	0.496951	0.506	0.293	1
Arid4b	0.0456285	1.45018	0.395	0.244	1
Ostc	0.0458693	0.151843	0.778	0.585	1
Rab31	0.0459237	0.961527	0.481	0.293	1
Rps20	0.0460686	-0.459058	0.938	0.951	1
Ssb	0.0461888	0.41836	0.815	0.585	1
Tsacc	0.0462727	2.40007	0.136	0.024	1
Abca5	0.0462727	2.5444	0.136	0.024	1
Smug1	0.0462727	3.34498	0.136	0.024	1
Acy3	0.0462727	2.12273	0.136	0.024	1
Prpf31	0.0463877	1.2803	0.272	0.122	1
Ttc14	0.0464288	0.420724	0.469	0.293	1
Dync1h1	0.0464288	0.911954	0.469	0.293	1
Bet1l	0.0464744	1.01901	0.37	0.195	1
Msl3	0.046522	2.3076	0.259	0.122	1
Ltbp3	0.0467638	0.242837	0.481	0.268	1
Rtcb	0.0468291	0.851107	0.519	0.293	1
H1f0	0.0468546	1.07999	0.407	0.244	1
Rbm34	0.0468687	1.53875	0.247	0.098	1
Mrps25	0.0469962	1.02822	0.531	0.366	1
Pigp	0.0471005	0.248287	0.679	0.537	1
Tbc1d7	0.0472052	0.424506	0.37	0.195	1
Zzef1	0.0472126	0.618986	0.272	0.122	1
Tmem127	0.0472562	-1.96494	0.111	0.244	1
Neurl3	0.0472956	-1.86413	0	0.049	1
Sp100	0.0472956	-1.6808	0	0.049	1
Ecel1	0.0472956	-1.71648	0	0.049	1
Inpp5d	0.0472956	-1.94342	0	0.049	1
Ankmy1	0.0472956	-3.68271	0	0.049	1
Wnk3	0.0472956	-2.20676	0	0.049	1
Fcrls	0.0472956	-1.91741	0	0.049	1
AC163616.1	0.0472956	-2.19488	0	0.049	1
Cd53	0.0472956	-1.93246	0	0.049	1
Egf	0.0472956	-3.07667	0	0.049	1
Lyn	0.0472956	-2.35778	0	0.049	1
Rbm12b1	0.0472956	-1.72546	0	0.049	1
Alpl	0.0472956	-1.83226	0	0.049	1
Tnfrsf25	0.0472956	-2.12035	0	0.049	1
Fam185a	0.0472956	-2.51948	0	0.049	1
Cryba4	0.0472956	-1.63011	0	0.049	1
Tmem119	0.0472956	-1.9524	0	0.049	1
Plbd1	0.0472956	-2.51269	0	0.049	1
Ckm	0.0472956	-4.36756	0	0.049	1
Zfp108	0.0472956	-1.94289	0	0.049	1
Gmfg	0.0472956	-2.01242	0	0.049	1
Siglech	0.0472956	-1.96603	0	0.049	1
Ust	0.0472956	-2.05319	0	0.049	1
Itgb2	0.0472956	-2.14519	0	0.049	1
Defb1	0.0472956	-5.4694	0	0.049	1
Slc9a5	0.0472956	-2.2143	0	0.049	1
Urb2	0.0472956	-1.61474	0	0.049	1
Gm49355	0.0472956	-1.49602	0	0.049	1
Ccnb1ip1	0.0472956	-3.2446	0	0.049	1
Ang	0.0472956	-1.93864	0	0.049	1
Ap1g2	0.0472956	-1.51345	0	0.049	1
Bud13	0.0472956	-1.99642	0	0.049	1
Ube2cbp	0.0472956	-2.96872	0	0.049	1
Nbeal2	0.0472956	-2.09742	0	0.049	1
Gfpt2	0.0472956	-2.60958	0	0.049	1
Gdf9	0.0472956	-3.3446	0	0.049	1
Tnfrsf13b	0.0472956	-2.20977	0	0.049	1
Evi2a	0.0472956	-4.44549	0	0.049	1
Wfdc17	0.0472956	-1.96936	0	0.049	1
Aoc2	0.0472956	-1.76487	0	0.049	1
Itga2b	0.0472956	-1.57274	0	0.049	1
Akr1c13	0.0472956	-2.46413	0	0.049	1
H3c1	0.0472956	-2.54285	0	0.049	1
Cage1	0.0472956	-2.48	0	0.049	1
Vash1	0.0472956	-4.19553	0	0.049	1
Tc2n	0.0472956	-3.11242	0	0.049	1
Jrk	0.0472956	-2.66198	0	0.049	1
Eppk1	0.0472956	-1.69034	0	0.049	1
Rac2	0.0472956	-2.39238	0	0.049	1
Tmem41a	0.0472956	-2.89642	0	0.049	1
Dnajc28	0.0472956	-2.6691	0	0.049	1
Pcdhga11	0.0472956	-4.81028	0	0.049	1
Gramd3	0.0472956	-1.50511	0	0.049	1
F830016B08Rik	0.0472956	-2.04668	0	0.049	1
Col17a1	0.0472956	-1.85003	0	0.049	1
Tmem213	0.0472956	-1.83857	0	0.024	1
Mettl7a1	0.0473001	0.807261	0.358	0.171	1
Wfs1	0.0474335	2.59657	0.136	0.024	1
Gas2	0.0474335	1.93326	0.136	0.024	1
Kremen1	0.0474335	3.30024	0.136	0.024	1
Cpeb4	0.0474335	1.9865	0.136	0.024	1
Ptdss2	0.0474975	1.12795	0.321	0.171	1
Ppp1r2	0.0476336	0.609847	0.667	0.537	1
Pde6d	0.0476927	0.643855	0.457	0.268	1
Gtf3c1	0.04774	1.50291	0.247	0.098	1
Mvd	0.047804	0.763474	0.321	0.146	1
Trappc2l	0.0478228	-0.128452	0.593	0.415	1
Mob1b	0.0479604	1.6876	0.235	0.098	1
Tbc1d19	0.0481997	2.03303	0.309	0.171	1
Hadh	0.0483451	0.692534	0.679	0.463	1
Arpc1b	0.0484624	0.208107	0.938	0.902	1
C1qtnf1	0.0486188	2.33788	0.136	0.024	1
Cxxc1	0.0488348	0.792553	0.407	0.22	1
Psmb3	0.0488466	0.392002	0.79	0.585	1
Ubald1	0.048864	1.87982	0.235	0.098	1
Kifc3	0.0488994	-2.35807	0.173	0.317	1
Rnpepl1	0.0489992	1.44732	0.309	0.171	1
Ercc1	0.0490006	1.44765	0.296	0.146	1
Pld3	0.0493159	-0.546666	0.494	0.268	1
Aldh2	0.0493257	0.371061	0.889	0.756	1
Rnf7	0.0494789	0.108843	0.827	0.634	1
Birc2	0.0494828	0.904406	0.42	0.244	1
Khk	0.0497379	1.06439	0.42	0.22	1
mt-Co3	0.0497555	-0.357586	1	1	1
Xpa	0.0498216	1.02594	0.383	0.22	1
Sh3bp4	0.0498288	2.32912	0.136	0.024	1
Inip	0.0498288	2.34267	0.136	0.024	1
Stat5a	0.0498288	2.12178	0.136	0.024	1
Impad1	0.0499528	0.831604	0.568	0.39	1
Rnf2	0.0501201	1.47725	0.21	0.073	1
Trim33	0.0501412	0.497125	0.358	0.195	1
Srsf10	0.0501948	0.615287	0.494	0.317	1
Foxo1	0.0503772	0.790715	0.568	0.341	1
Brd9	0.0505844	1.23773	0.469	0.293	1
Tcf3	0.0506602	1.01237	0.333	0.171	1
Zfp113	0.051064	-2.70694	0.062	0.171	1
Isca1	0.051113	1.91427	0.21	0.073	1
Gsk3a	0.0511194	0.924442	0.457	0.293	1
Ppfia1	0.051363	-1.66812	0.247	0.366	1
Rbbp4	0.0514377	0.514205	0.63	0.488	1
Sept10	0.0515261	1.46274	0.296	0.146	1
Micos10	0.0515988	0.469522	0.716	0.463	1
Xaf1	0.0516118	0.766245	0.654	0.512	1
Gdi1	0.051723	1.72231	0.358	0.195	1
Plpp2	0.0518068	-0.967953	0.222	0.073	1
Slc35a2	0.051886	0.745716	0.321	0.146	1
Mafg	0.051886	-0.119689	0.321	0.146	1
Ptn	0.0521919	0.359447	0.914	0.854	1
Ints1	0.0522518	2.45208	0.198	0.073	1
Ogfr	0.0523481	1.88499	0.321	0.171	1
Atp6v0b	0.0523695	0.542035	0.79	0.659	1
Pycr2	0.0523923	1.70108	0.346	0.195	1
Necap2	0.0523923	1.3246	0.346	0.195	1
Zcchc9	0.0523923	1.02074	0.346	0.195	1
Usp14	0.0524073	0.733347	0.395	0.22	1
Tmem98	0.052425	1.29707	0.272	0.122	1
Serf1	0.0524398	0.900872	0.568	0.415	1
Mgll	0.0525294	0.308243	0.358	0.195	1
Arhgef40	0.052593	0.890878	0.457	0.293	1
Ywhaq	0.0528392	0.400418	0.802	0.61	1
Gnas	0.0528525	0.248722	0.914	0.854	1
Pym1	0.0529052	1.98026	0.173	0.049	1
Tmem165	0.0529253	0.882727	0.519	0.366	1
Fnbp4	0.0529327	-0.432959	0.185	0.049	1
Fmc1	0.0530792	0.394898	0.741	0.561	1
Ggnbp2	0.0530889	0.947463	0.494	0.341	1
Gin1	0.0531482	1.35148	0.21	0.073	1
Kmt2b	0.0531482	1.07312	0.21	0.073	1
Nnat	0.0532584	0.120957	0.247	0.098	1
Axin1	0.0533022	2.51638	0.198	0.073	1
Pdia3	0.0534735	0.339122	0.889	0.732	1
Gpn2	0.0536113	1.51722	0.136	0.024	1
Supt5	0.0536411	0.192574	0.432	0.22	1
Tmem128	0.0538108	0.790983	0.494	0.317	1
Arfrp1	0.0538467	0.719037	0.346	0.171	1
Alg14	0.0538959	0.628573	0.543	0.39	1
Gdi2	0.0540068	0.268513	0.667	0.488	1
Nsmaf	0.0540476	1.78868	0.173	0.049	1
Pcdh7	0.0540476	1.89436	0.173	0.049	1
Med13	0.0540484	-1.58718	0.247	0.39	1
Limch1	0.054102	0.245735	0.457	0.293	1
Smu1	0.0542603	0.698316	0.457	0.268	1
Banf1	0.0542603	-1.03335	0.457	0.268	1
Ddx46	0.054266	1.49052	0.272	0.122	1
Rap2b	0.0542813	0.386065	0.469	0.293	1
Nf1	0.0543408	0.976854	0.407	0.244	1
Chadl	0.0543513	0.280825	0.778	0.537	1
Zfp945	0.0543702	2.48449	0.198	0.073	1
Tmem256	0.0543936	0.212119	0.802	0.634	1
Sar1b	0.0544404	0.129726	0.691	0.561	1
Mgp	0.0544557	4.19756	0.037	0	1
Stk35	0.0544803	2.62167	0.086	0	1
1700003F12Rik	0.0544803	2.1156	0.086	0	1
Szt2	0.0544803	3.48048	0.086	0	1
Trim62	0.0544803	1.63645	0.086	0	1
Kdr	0.0544803	1.63448	0.086	0	1
Eln	0.0544803	2.14194	0.086	0	1
Zfp566	0.0544803	2.28294	0.086	0	1
Aldh16a1	0.0544803	1.90192	0.086	0	1
Tcim	0.0544803	3.52703	0.086	0	1
Unk	0.0544803	2.14437	0.086	0	1
Bahcc1	0.0544803	2.01176	0.086	0	1
Npb	0.0544803	2.44979	0.086	0	1
Narf	0.0544803	1.93207	0.086	0	1
Scgn	0.0544803	2.74344	0.086	0	1
B4galt7	0.0544803	1.99995	0.086	0	1
Fastkd3	0.0544803	2.1139	0.086	0	1
Zfp760	0.0544803	1.45657	0.086	0	1
Rab26	0.0544803	2.51689	0.086	0	1
Wdr90	0.0544803	2.35491	0.086	0	1
Syngap1	0.0544803	2.16079	0.086	0	1
Uty	0.0544803	2.36569	0.086	0	1
AW554918	0.0544803	2.28377	0.086	0	1
Nfatc1	0.0544803	2.11989	0.086	0	1
Ranbp6	0.0544803	2.50048	0.086	0	1
Scamp2	0.0545756	0.881294	0.58	0.39	1
Fbxl14	0.0546265	0.119934	0.086	0.22	1
Elp3	0.0549243	-1.93607	0.062	0.171	1
Gnl3	0.0550621	0.886907	0.296	0.146	1
Herpud2	0.0550621	1.07911	0.296	0.146	1
Lin37	0.0552106	1.43405	0.173	0.049	1
Ftl1-ps1	0.0552179	2.00386	0.284	0.146	1
Dennd4c	0.0554559	2.22095	0.198	0.073	1
Cdc42	0.0555855	0.266875	0.864	0.707	1
Hsbp1	0.055821	-0.552885	0.815	0.78	1
Mrps26	0.0559002	0.404515	0.37	0.195	1
Pkia	0.0560829	0.410184	0.494	0.317	1
B2m	0.0562241	-0.39701	0.901	0.854	1
Dek	0.0562601	0.279719	0.691	0.463	1
Med8	0.0564331	0.884759	0.457	0.293	1
Abhd8	0.056473	1.52836	0.259	0.122	1
Myl9	0.0564834	0.780098	0.63	0.463	1
Msl2	0.0565597	-2.56681	0.111	0.244	1
Sub1	0.056561	0.585785	0.716	0.512	1
Ntrk2	0.0566697	0.533819	0.864	0.585	1
Nae1	0.0567206	0.813235	0.358	0.195	1
Hprt	0.056733	-0.535555	0.481	0.293	1
Fmr1	0.0567723	0.780703	0.407	0.244	1
Megf6	0.0567981	-1.1728	0.074	0.195	1
Arl6	0.0570357	0.166226	0.383	0.22	1
Nr1h2	0.0570574	0.504093	0.395	0.244	1
Eloa	0.0572258	0.869787	0.247	0.098	1
Pbrm1	0.057236	0.642938	0.556	0.366	1
Tab2	0.0574675	0.804922	0.58	0.366	1
Gulp1	0.0575179	0.23681	0.519	0.341	1
Cuedc2	0.057587	0.41762	0.852	0.707	1
Ilf3	0.0576488	1.06753	0.284	0.122	1
Utp3	0.0576708	1.18499	0.407	0.268	1
Acat1	0.0578089	0.898673	0.642	0.463	1
Rcn3	0.0579518	0.486267	0.593	0.39	1
Hnrnpab	0.0580011	1.01657	0.531	0.415	1
Mrpl34	0.0580243	0.652737	0.543	0.341	1
Dnm2	0.0580431	0.867768	0.284	0.146	1
Kcnmb4	0.0581318	0.605912	0.568	0.366	1
Yipf4	0.0582962	0.855885	0.568	0.415	1
Stx4a	0.0583227	1.05084	0.469	0.317	1
Gramd1b	0.0583383	0.687163	0.617	0.366	1
Hnrnpa0	0.0585666	0.754035	0.593	0.488	1
Mat2a	0.058644	0.200131	0.691	0.512	1
Ddx24	0.058644	0.216468	0.691	0.512	1
Mbnl1	0.0588473	0.432092	0.469	0.268	1
Kifap3	0.0590005	1.00957	0.556	0.415	1
Ndufa12	0.0590617	0.197756	0.79	0.585	1
Kif3a	0.0591759	-0.383504	0.506	0.341	1
Ciao2b	0.0591972	0.25039	0.444	0.268	1
Mmadhc	0.059281	0.747594	0.346	0.195	1
Pex5l	0.0592999	1.10817	0.247	0.098	1
Nectin2	0.0593466	-2.74799	0.049	0.146	1
Hddc2	0.0593531	0.342919	0.432	0.244	1
Ndufb4	0.0593993	0.451433	0.889	0.634	1
Scd1	0.059768	0.304843	0.914	0.805	1
Atp2a2	0.0598756	0.473688	0.593	0.415	1
Mid1ip1	0.0599167	0.404849	0.778	0.585	1
Ipo8	0.0599197	3.60167	0.16	0.049	1
Cyb5d2	0.0599197	2.65369	0.16	0.049	1
Rmi1	0.0599197	2.23336	0.16	0.049	1
Top1	0.0599576	0.773966	0.679	0.488	1
Dlat	0.0599926	1.44761	0.284	0.146	1
Hsd17b4	0.0600958	0.705981	0.617	0.439	1
Slc35f5	0.0601154	-0.926753	0.272	0.122	1
Fabp5	0.0602607	0.483511	0.877	0.78	1
Usf1	0.060401	0.134442	0.309	0.146	1
Rpl24	0.060695	-0.357354	0.938	0.902	1
Celf1	0.0607252	1.41313	0.358	0.22	1
Taf12	0.0607437	1.115	0.296	0.146	1
Asph	0.0607475	1.41716	0.383	0.244	1
Lrif1	0.0608116	1.32625	0.21	0.073	1
Col12a1	0.0612514	0.502688	0.815	0.659	1
Eprs	0.0612722	0.83211	0.556	0.39	1
Ramp2	0.0614123	0.512268	0.704	0.561	1
Mrpl48	0.0614223	0.163326	0.58	0.39	1
Acaca	0.0616389	0.990343	0.395	0.22	1
Gadd45g	0.0618351	2.49359	0.247	0.122	1
Kidins220	0.0618994	0.774364	0.321	0.146	1
Cdkn2aip	0.0619683	0.773798	0.235	0.098	1
Atic	0.0619777	1.32206	0.21	0.073	1
Zwint	0.062051	1.29257	0.346	0.195	1
Sdhd	0.062097	0.896165	0.481	0.317	1
Bglap3	0.0621319	-4.0516	0.148	0.195	1
Bbip1	0.0621453	1.04672	0.605	0.439	1
Sept11	0.0621532	0.796579	0.333	0.171	1
Mmgt2	0.0621989	0.13635	0.457	0.293	1
Glt8d1	0.0622445	0.550973	0.605	0.39	1
Cdc27	0.0623987	-3.2162	0.099	0.22	1
Pcm1	0.0624218	0.764565	0.531	0.366	1
Acyp2	0.0624558	0.512573	0.716	0.463	1
Emd	0.0627025	0.55352	0.407	0.22	1
Dxo	0.0630868	1.34494	0.235	0.098	1
Tuba1b	0.0631536	0.216906	0.815	0.61	1
Gnptg	0.0631552	1.01069	0.395	0.244	1
Mettl24	0.0631622	1.10634	0.21	0.073	1
Ttc3	0.0632422	0.418558	0.691	0.512	1
Ablim2	0.0633302	-4.62932	0.037	0.122	1
Zscan29	0.0633764	-1.50445	0.062	0.171	1
Ttpal	0.0633764	-1.25181	0.062	0.171	1
Slc29a3	0.0633764	-0.498901	0.062	0.171	1
Aamdc	0.0633821	0.543668	0.63	0.463	1
Tmed1	0.0633834	0.820852	0.494	0.317	1
Emc1	0.0634933	2.23518	0.222	0.098	1
Zfp513	0.0635725	2.72217	0.198	0.073	1
Reep5	0.063742	0.482798	0.778	0.585	1
Mrps17	0.0637557	0.647916	0.605	0.439	1
Tacc2	0.0640031	1.32167	0.358	0.195	1
Tmem237	0.0641806	0.989888	0.469	0.317	1
Rcl1	0.0642218	0.575404	0.235	0.098	1
Taf9b	0.0642369	-2.07217	0.173	0.341	1
Trappc3	0.0647039	0.750247	0.58	0.415	1
Usp1	0.0647738	1.92574	0.259	0.122	1
Tmem159	0.0647738	1.20015	0.259	0.122	1
Dhx38	0.0648084	1.50027	0.198	0.073	1
Tlcd1	0.0649344	0.32533	0.531	0.366	1
Tex261	0.0649868	0.984621	0.494	0.366	1
Plscr1	0.0650915	1.04616	0.333	0.171	1
Nsun2	0.0650915	1.17001	0.333	0.171	1
Exosc7	0.0651047	1.44791	0.284	0.146	1
Thoc7	0.0651643	0.676862	0.63	0.439	1
Samd4	0.0651651	0.728878	0.679	0.512	1
Mrpl17	0.0651963	0.29558	0.679	0.439	1
Zfp687	0.0652353	2.23566	0.123	0.024	1
Odf2l	0.0652353	2.08974	0.123	0.024	1
3110021N24Rik	0.0652353	2.32375	0.123	0.024	1
Ajap1	0.0652353	2.61487	0.123	0.024	1
Cptp	0.0652353	2.2451	0.123	0.024	1
Wdr19	0.0652353	2.68996	0.123	0.024	1
Tfb2m	0.0652741	1.74284	0.16	0.049	1
Rcc1l	0.0652741	2.72298	0.16	0.049	1
Macrod2	0.0652855	1.40851	0.173	0.049	1
Flrt1	0.0652855	1.58376	0.16	0.049	1
Mllt6	0.0653737	1.28107	0.235	0.098	1
Anapc13	0.0654318	0.57458	0.654	0.463	1
Lage3	0.0657276	-0.297786	0.519	0.341	1
Ralgps1	0.0657619	-2.62034	0.049	0.146	1
Pdgfa	0.065831	0.796218	0.63	0.463	1
Akr1b10	0.0658788	1.54197	0.259	0.122	1
Mpg	0.06591	1.02527	0.346	0.195	1
Plekha3	0.0660641	1.68233	0.198	0.073	1
Gne	0.0660641	1.12059	0.198	0.073	1
Fkbp14	0.0661691	1.33015	0.284	0.146	1
Ankrd28	0.0662918	-1.96885	0.099	0.22	1
Fmnl2	0.0663335	0.519681	0.432	0.268	1
St7	0.0664222	-0.530762	0.062	0.171	1
Cda	0.066429	0.877819	0.531	0.341	1
Hmgn3	0.066439	0.376865	0.852	0.659	1
Atp5j	0.0665178	0.197107	0.901	0.756	1
Hps3	0.0666727	2.02747	0.16	0.049	1
Zfp821	0.0666727	1.93835	0.16	0.049	1
Nphp1	0.0667333	1.30701	0.37	0.22	1
Dclre1a	0.0668423	3.92679	0.123	0.024	1
Trap1	0.0669026	0.307401	0.296	0.146	1
Dtx3l	0.0669026	-1.95344	0.198	0.341	1
Slc25a25	0.0670107	-3.6826	0.037	0.122	1
Cldn34c1	0.0670107	-2.35093	0.037	0.122	1
Vps4a	0.0671133	1.06304	0.333	0.171	1
Ccdc102a	0.0673397	1.17102	0.198	0.073	1
Ndufv1	0.067353	0.484687	0.691	0.537	1
Irak1bp1	0.067421	0.994971	0.407	0.244	1
Nagk	0.067427	0.277408	0.543	0.39	1
Coa3	0.0676157	0.499044	0.568	0.39	1
Cep162	0.0676206	2.30468	0.185	0.073	1
Max	0.0677122	0.934055	0.37	0.22	1
Actr3	0.0677159	-0.13303	0.556	0.341	1
Arhgef10	0.0677159	0.367232	0.531	0.39	1
Prpsap2	0.0677285	0.965495	0.235	0.098	1
Abca1	0.0678184	-1.62938	0.531	0.61	1
Soat1	0.0680889	0.788334	0.21	0.073	1
Man2c1	0.0680958	2.10114	0.16	0.049	1
Psmb2	0.0682173	0.414365	0.84	0.707	1
Gpt2	0.0682216	0.704296	0.728	0.537	1
Gpbp1	0.0682313	0.706424	0.481	0.317	1
Zswim8	0.0683548	0.664807	0.358	0.22	1
Rspry1	0.0683855	0.961523	0.321	0.171	1
Rad52	0.0684817	2.15763	0.123	0.024	1
Etv5	0.0684817	1.91218	0.123	0.024	1
Nampt	0.0685341	1.08798	0.309	0.171	1
Rnf167	0.0685817	0.303717	0.309	0.146	1
Tlk2	0.0685872	-0.293334	0.123	0.268	1
Cpt1c	0.0686356	2.02992	0.198	0.073	1
Sumo1	0.0686511	0.521812	0.704	0.561	1
Gusb	0.0688437	1.15622	0.346	0.171	1
Nktr	0.0688537	0.91855	0.556	0.39	1
Prmt7	0.0691779	-2.24079	0.049	0.146	1
Ik	0.0692714	1.073	0.519	0.341	1
Them4	0.0692875	1.1899	0.259	0.122	1
Dennd5a	0.0694193	0.783984	0.506	0.341	1
Nxn	0.0694427	0.837914	0.321	0.171	1
Uri1	0.0694694	0.880788	0.37	0.244	1
Dtymk	0.0698127	0.150377	0.58	0.366	1
Cog4	0.069885	0.428517	0.333	0.195	1
Pex7	0.0699648	1.07643	0.346	0.195	1
Pitpna	0.0700782	0.498759	0.642	0.488	1
Zfp62	0.0701527	-1.10193	0.235	0.098	1
Tnfaip6	0.070154	2.17178	0.123	0.024	1
Dazap2	0.0701815	0.489176	0.519	0.341	1
Rpl36	0.0701939	-0.502386	0.938	0.902	1
Tsnax	0.0703144	0.170098	0.704	0.512	1
Zmat5	0.0703196	0.804804	0.457	0.293	1
Atp6v1a	0.0705158	1.02121	0.494	0.317	1
Aen	0.0706683	0.74783	0.21	0.073	1
Rad1	0.0706683	0.74934	0.21	0.073	1
Snx12	0.0706894	1.14639	0.309	0.171	1
Ino80c	0.0707302	1.7017	0.222	0.098	1
Sin3b	0.070751	0.506158	0.654	0.439	1
Prxl2b	0.070751	-1.2795	0.556	0.634	1
Pcdh10	0.0708583	2.17665	0.272	0.146	1
Atp5pb	0.070866	0.109046	0.852	0.707	1
Tagln2	0.0709023	-0.599669	0.543	0.317	1
Pigs	0.070919	-0.967127	0.16	0.293	1
Sec22a	0.070919	1.38761	0.247	0.122	1
Atp9a	0.0709392	1.80852	0.333	0.195	1
Phlpp2	0.0709398	-0.849931	0.049	0.146	1
Auh	0.0710098	1.01842	0.346	0.195	1
St3gal6	0.0712888	1.37552	0.198	0.073	1
Phf14	0.0713166	-0.182147	0.407	0.244	1
Ncbp2	0.071378	0.714384	0.494	0.341	1
Magt1	0.0714433	0.449011	0.556	0.366	1
Hadhb	0.0716159	0.550251	0.691	0.537	1
Htra2	0.0716394	0.858887	0.259	0.122	1
Prkrip1	0.0716763	1.76279	0.185	0.073	1
Gm14305	0.0717878	1.27293	0.309	0.171	1
Ints12	0.0718597	2.00965	0.123	0.024	1
B3gat2	0.0721777	0.656569	0.383	0.244	1
Serbp1	0.0721781	0.242418	0.815	0.61	1
Usp48	0.0721952	1.76278	0.259	0.146	1
Stmn2	0.0722827	-1.53401	0.309	0.39	1
Fam149b	0.0724198	0.95645	0.296	0.146	1
Ywhaz	0.0725087	0.250702	0.728	0.537	1
Btbd6	0.0725158	1.43673	0.16	0.049	1
Nalcn	0.0726466	1.26725	0.198	0.073	1
Tmem246	0.0726951	0.666991	0.321	0.171	1
Eif1	0.0727503	0.24164	0.951	0.878	1
Txnl4a	0.0727595	0.764432	0.519	0.366	1
Adam23	0.0728355	0.320605	0.815	0.634	1
Gpc1	0.0728599	-3.103	0.037	0.122	1
Kansl1l	0.0728603	1.05972	0.284	0.146	1
Rock1	0.0730053	0.43452	0.568	0.439	1
Cutc	0.0730718	1.91129	0.185	0.073	1
AB124611	0.0731303	-4.1971	0.012	0.073	1
Eml6	0.0731303	-2.34328	0.012	0.073	1
Ahnak2	0.0731303	-2.49411	0.012	0.073	1
Coq2	0.0732126	0.880957	0.457	0.293	1
Lcorl	0.0732236	-1.86855	0.099	0.22	1
Morc2a	0.0732236	-1.81711	0.099	0.22	1
Paip2	0.0732469	0.313543	0.815	0.585	1
Otud1	0.0732879	1.56139	0.222	0.098	1
Cd3eap	0.0732879	1.54131	0.222	0.098	1
Arhgef2	0.0733273	1.33913	0.21	0.073	1
2510009E07Rik	0.0733534	2.31947	0.247	0.122	1
Bad	0.0733885	0.233589	0.556	0.39	1
Tmed9	0.0734071	0.161995	0.704	0.537	1
Pigv	0.0735993	2.50499	0.123	0.024	1
Pcdh17	0.0737496	0.253688	0.506	0.317	1
Prima1	0.0738359	1.52904	0.37	0.22	1
Sema4d	0.073939	-0.520279	0.136	0.268	1
Nudt3	0.0740359	0.815236	0.444	0.293	1
Creb3l1	0.0740392	-2.43458	0.025	0.098	1
Hnrnph3	0.0740971	0.714107	0.506	0.341	1
Rab9	0.0741049	0.223925	0.642	0.439	1
Plekho1	0.0741423	0.817745	0.309	0.146	1
Aspscr1	0.0743733	1.25796	0.272	0.146	1
Ltn1	0.0743733	1.37659	0.272	0.146	1
Arl1	0.0747541	0.328949	0.704	0.561	1
Pls3	0.0749318	0.847354	0.321	0.171	1
Kcnj16	0.0752873	-1.05345	0.235	0.39	1
Thrap3	0.0753188	0.565932	0.346	0.195	1
Rnf187	0.0753448	-0.138844	0.58	0.39	1
A130010J15Rik	0.0753731	1.65988	0.123	0.024	1
Metap1	0.0753731	1.63874	0.123	0.024	1
Hmgxb4	0.0754256	1.64707	0.198	0.073	1
Rps29	0.0754384	-0.566576	0.988	0.951	1
Creb1	0.0755909	1.37271	0.16	0.049	1
Sbno2	0.0757425	0.547136	0.321	0.146	1
Cdc42ep5	0.0759067	0.802351	0.395	0.244	1
Afg3l1	0.0759207	1.2002	0.222	0.098	1
Tmem117	0.0759207	1.43513	0.222	0.098	1
Hecw2	0.0759891	-2.76749	0.012	0.073	1
Morc4	0.0759891	-4.75846	0.012	0.073	1
Plch1	0.0759891	-1.88174	0.012	0.073	1
Tspan5	0.0759891	-2.15294	0.012	0.073	1
1700003E16Rik	0.0759891	-2.87501	0.012	0.073	1
Itgam	0.0759891	-1.92117	0.012	0.073	1
Plxnc1	0.0759891	-3.06116	0.012	0.073	1
Tbrg4	0.0759891	-3.86854	0.012	0.073	1
Rsrc1	0.076206	0.604895	0.383	0.22	1
Sftpd	0.0763409	2.07702	0.012	0	1
Fdxr	0.0763599	1.17984	0.358	0.195	1
Cdh19	0.0763704	0.454127	0.802	0.61	1
F11r	0.0764101	1.55005	0.074	0	1
Garnl3	0.0764101	1.91692	0.074	0	1
Alg13	0.0764101	1.91227	0.074	0	1
Spata5	0.0764101	1.54308	0.074	0	1
Tmem39b	0.0764101	1.60169	0.074	0	1
Zfp982	0.0764101	1.60701	0.074	0	1
Pex10	0.0764101	1.45829	0.074	0	1
Rbm19	0.0764101	1.80284	0.074	0	1
Irs3	0.0764101	2.07017	0.074	0	1
Ap5z1	0.0764101	2.35703	0.074	0	1
Fbxl18	0.0764101	2.61113	0.074	0	1
Cttnbp2	0.0764101	1.5952	0.074	0	1
Ttc26	0.0764101	2.62971	0.074	0	1
Ndnf	0.0764101	1.84787	0.074	0	1
Dusp16	0.0764101	1.94083	0.074	0	1
Sinhcaf	0.0764101	1.42682	0.074	0	1
Zswim9	0.0764101	1.38218	0.074	0	1
Ercc2	0.0764101	1.55435	0.074	0	1
Zfp941	0.0764101	2.22082	0.074	0	1
Tmem200a	0.0764101	3.09009	0.074	0	1
Nek3	0.0764101	1.9966	0.074	0	1
Grid1	0.0764101	1.25053	0.074	0	1
Tyk2	0.0764101	1.52379	0.074	0	1
Igsf9b	0.0764101	2.16748	0.074	0	1
Dixdc1	0.0764101	1.66461	0.074	0	1
Milr1	0.0764101	1.69268	0.074	0	1
Hid1	0.0764101	1.47416	0.074	0	1
H2bc6	0.0764101	2.82991	0.074	0	1
Shc3	0.0764101	1.54821	0.074	0	1
Cks2	0.0764101	1.79552	0.074	0	1
Sh3yl1	0.0764101	1.58245	0.074	0	1
Lsmem1	0.0764101	1.40766	0.074	0	1
Cmbl	0.0764101	1.57149	0.074	0	1
Mief1	0.0764101	1.71583	0.074	0	1
Ypel1	0.0764101	2.12533	0.074	0	1
Shd	0.0764101	2.60305	0.074	0	1
Kdm5d	0.0764101	3.00108	0.074	0	1
Pomc	0.0764101	-3.39673	0.025	0.098	1
Mab21l1	0.0764101	2.57426	0.062	0	1
Ccl4	0.0764101	1.37344	0.062	0	1
Poll	0.0764473	-0.794493	0.049	0.146	1
Nkap	0.0767947	1.47382	0.272	0.146	1
Maf	0.0768159	0.287723	0.691	0.463	1
Tm7sf3	0.0768877	0.433482	0.642	0.439	1
Cadm4	0.0769649	0.375894	0.914	0.805	1
Blvra	0.0769689	-1.04677	0.395	0.244	1
Mast2	0.0769868	-1.64044	0.037	0.122	1
Morn4	0.0769868	-3.30099	0.037	0.122	1
Ola1	0.0771117	0.399346	0.432	0.268	1
Iars2	0.0771328	2.02081	0.247	0.122	1
Slc25a44	0.0771679	1.45657	0.16	0.049	1
Ccdc28a	0.0771816	1.18755	0.123	0.024	1
Chga	0.0772892	-0.1595	0.099	0.098	1
Itfg2	0.0773919	2.26367	0.185	0.073	1
Wdr12	0.0774687	0.165476	0.21	0.073	1
Fxr2	0.0776214	1.2894	0.284	0.146	1
Socs3	0.0777513	0.587848	0.654	0.537	1
Cbx3	0.0779388	0.122208	0.79	0.61	1
Sptan1	0.078137	0.326452	0.58	0.439	1
Mpz	0.0782745	0.230497	0.914	0.78	1
Tma7	0.0782837	0.353797	0.753	0.634	1
Polr3h	0.0785305	0.563374	0.617	0.463	1
Tmf1	0.0786891	1.04654	0.333	0.195	1
Ptprb	0.0788425	-2.89702	0.025	0.098	1
Fam91a1	0.0788515	1.32823	0.296	0.171	1
Qser1	0.0788773	2.11013	0.185	0.073	1
Mrpl19	0.0788773	1.86697	0.185	0.073	1
Dpp3	0.0788773	1.81334	0.185	0.073	1
Atxn7l3b	0.0789035	0.487602	0.827	0.634	1
Zfp984	0.0789384	-1.49974	0.012	0.073	1
Ncf1	0.0789384	-1.92932	0.012	0.073	1
Blm	0.0789384	-2.84713	0.012	0.073	1
Hinfp	0.0789384	-1.98406	0.012	0.073	1
Slc22a5	0.0789384	-2.30958	0.012	0.073	1
Zfp748	0.0789384	-1.50844	0.012	0.073	1
Rwdd2b	0.0789384	-1.98234	0.012	0.073	1
Spink10	0.0789384	-1.17755	0.012	0.073	1
Mpp7	0.0790254	1.14391	0.123	0.024	1
Tfpi	0.0791205	-1.10922	0.037	0.122	1
Zfp410	0.0791205	-2.61322	0.037	0.122	1
Sel1l	0.0791942	0.838154	0.494	0.341	1
Opa3	0.0792037	0.60853	0.235	0.098	1
Col9a3	0.0792624	0.389845	0.679	0.512	1
Polr2l	0.0794275	0.525709	0.42	0.268	1
Psmc2	0.0794957	0.227043	0.63	0.439	1
Trim35	0.0795639	0.110616	0.543	0.39	1
Ndufs2	0.0797001	0.780632	0.654	0.463	1
Mast3	0.0800141	1.52736	0.222	0.098	1
Spryd3	0.0804023	0.93118	0.16	0.049	1
Nsun4	0.0809048	0.702455	0.123	0.024	1
Mcm4	0.0809048	0.977316	0.123	0.024	1
Rps21	0.080912	-0.209715	0.963	0.902	1
Uqcrfs1	0.0809592	-0.257254	0.642	0.463	1
Dpysl3	0.0810693	1.60729	0.247	0.122	1
Hnrnpl	0.0811533	0.550707	0.58	0.415	1
Fcgrt	0.0812884	-0.144894	0.704	0.512	1
Wdr5	0.0813021	-0.53075	0.037	0.122	1
Parp11	0.0813021	-1.68565	0.037	0.122	1
Serp2	0.0813021	-1.17852	0.037	0.122	1
Cables2	0.0813376	-1.66089	0.025	0.098	1
Wdr59	0.0813376	-2.18559	0.025	0.098	1
Tmem170	0.0813376	-1.51336	0.025	0.098	1
Fxyd2	0.0813376	-1.73604	0.025	0.098	1
Arpc1a	0.0814756	0.216465	0.901	0.78	1
Srebf2	0.0816154	0.951277	0.519	0.366	1
Smpdl3a	0.0817876	0.529662	0.704	0.537	1
Luc7l	0.0818305	1.74441	0.272	0.146	1
Sppl2a	0.081867	0.88228	0.407	0.244	1
Apoe	0.0818876	0.215319	1	1	1
Zfp335	0.0819802	-1.34268	0.012	0.073	1
Rab3b	0.0819802	-1.21865	0.012	0.073	1
Nupl2	0.0819802	-1.22121	0.012	0.073	1
Dse	0.0819802	-1.17681	0.012	0.073	1
2310030G06Rik	0.0819802	-1.13215	0.012	0.073	1
Stac	0.0819802	-1.25655	0.012	0.073	1
Aarsd1	0.0819802	-1.13459	0.012	0.073	1
Fam20a	0.0819802	0.143073	0.012	0.073	1
Zfp85	0.0819802	0.259842	0.012	0.073	1
Fam228b	0.0819802	-0.331024	0.012	0.073	1
Tusc1	0.0820603	0.610976	0.16	0.049	1
Zfp775	0.0820603	-0.172015	0.16	0.049	1
Tdrkh	0.0820603	-1.6067	0.086	0.195	1
Anapc5	0.0821979	0.743968	0.568	0.415	1
Pabpn1	0.0823147	1.28192	0.309	0.171	1
Glo1	0.0823659	0.236003	0.741	0.61	1
Vps52	0.0824172	1.53598	0.247	0.122	1
Tmem121	0.0824206	0.737473	0.358	0.22	1
Ube2r2	0.0829379	0.315501	0.654	0.439	1
Klf13	0.0829379	0.597457	0.63	0.488	1
Adprhl2	0.0830455	0.107138	0.259	0.122	1
Ccnq	0.0830592	0.647881	0.481	0.317	1
Nr2c2ap	0.0832068	0.452706	0.321	0.171	1
Slc25a28	0.0832068	0.865009	0.321	0.171	1
Ormdl3	0.0832319	-1.32762	0.358	0.195	1
Rps11	0.0832829	-0.341061	0.963	0.878	1
Yipf6	0.0833631	0.799523	0.235	0.098	1
Slc25a27	0.0833631	1.08296	0.235	0.098	1
Stox2	0.0833657	1.23045	0.321	0.195	1
Gstz1	0.0834183	1.32389	0.333	0.195	1
Smarca2	0.0834433	0.893009	0.444	0.293	1
Serp1	0.0834999	0.406803	0.506	0.293	1
Ptpn3	0.0835323	-1.73765	0.037	0.122	1
Nceh1	0.0836977	0.30852	0.519	0.366	1
Pde4dip	0.08372	-1.04857	0.173	0.293	1
Tbc1d23	0.083746	1.61406	0.16	0.049	1
Acvr2a	0.083746	-0.994124	0.086	0.195	1
Pex3	0.0837832	2.02775	0.247	0.122	1
3830406C13Rik	0.0837832	1.30918	0.247	0.122	1
Ss18l1	0.0838963	-1.4204	0.025	0.098	1
Fam118b	0.0838963	-2.61473	0.025	0.098	1
Nsg1	0.0839449	-0.725726	0.185	0.366	1
Eif3g	0.0841341	0.713936	0.481	0.317	1
Skp1a	0.0842342	0.244914	0.728	0.512	1
Clcn4	0.0842558	0.813602	0.556	0.415	1
Per1	0.084447	1.63168	0.272	0.146	1
Chmp6	0.0844472	0.903593	0.321	0.171	1
Timm17b	0.0845459	-0.323631	0.444	0.293	1
Ap3d1	0.0847883	0.667767	0.235	0.098	1
Rc3h2	0.0848164	1.51593	0.309	0.171	1
Fbxo6	0.0848371	0.594056	0.272	0.122	1
Vwa1	0.0849707	0.15971	0.889	0.707	1
Crtc2	0.0850252	1.82963	0.21	0.098	1
Fam160b1	0.0850252	2.65331	0.21	0.098	1
Dhdds	0.0850527	1.58183	0.185	0.073	1
Apobec3	0.0850527	1.55502	0.185	0.073	1
Bckdha	0.0850772	0.647582	0.296	0.171	1
Rars	0.0851116	0.506253	0.284	0.122	1
Jdp2	0.0852151	-1.46269	0.235	0.366	1
Pmvk	0.0852377	0.32797	0.63	0.463	1
Fbxo7	0.0852858	0.210526	0.568	0.415	1
Pigx	0.0853121	1.20715	0.383	0.244	1
Calm2	0.0854159	-0.55751	0.864	0.854	1
Ly96	0.0854596	-1.33115	0.086	0.195	1
Rabep1	0.0854862	0.979257	0.432	0.293	1
Egfl8	0.0857325	0.357879	0.84	0.683	1
Spef1	0.0858118	-1.87555	0.037	0.122	1
Amigo1	0.0858118	-1.63759	0.037	0.122	1
Mxi1	0.0863301	0.680993	0.543	0.415	1
Ctsz	0.0863444	0.492617	0.642	0.512	1
Plec	0.0863523	0.570627	0.58	0.366	1
Nhlrc3	0.0865199	-1.24063	0.025	0.098	1
Exo5	0.0865199	-2.33045	0.025	0.098	1
Zfp518b	0.0865199	-0.972148	0.025	0.098	1
Dysf	0.0865199	-1.07168	0.025	0.098	1
C1rl	0.0865199	-3.6302	0.025	0.098	1
Fmnl3	0.0865199	-1.00624	0.025	0.098	1
Trappc11	0.086528	2.16949	0.21	0.098	1
Eid2b	0.0866562	1.72899	0.185	0.073	1
Rictor	0.0866562	2.69246	0.185	0.073	1
Taok3	0.0868512	1.29596	0.346	0.22	1
Arl2bp	0.0868936	0.642981	0.457	0.293	1
1810058I24Rik	0.0869976	0.783801	0.654	0.512	1
Macroh2a1	0.0869976	0.684925	0.654	0.512	1
Naa15	0.0870976	1.5507	0.321	0.195	1
Vps13d	0.0872014	-2.36377	0.086	0.195	1
Zfp318	0.0872192	2.55783	0.235	0.122	1
Thoc2	0.087235	1.06174	0.42	0.268	1
Ttc28	0.0874503	1.04974	0.407	0.268	1
Gnptab	0.0874531	1.75981	0.148	0.049	1
Gpsm2	0.0876338	0.921669	0.519	0.39	1
Fam104a	0.0877737	0.473254	0.716	0.537	1
Txnl1	0.0877737	0.214576	0.716	0.537	1
Tatdn1	0.0880521	1.75984	0.21	0.098	1
Tgds	0.0881413	-0.146636	0.037	0.122	1
Zfp148	0.0882777	0.927587	0.346	0.195	1
Ndufaf1	0.0882839	1.46224	0.185	0.073	1
Mxd4	0.0883069	1.33357	0.519	0.341	1
Ggct	0.08842	0.987462	0.358	0.22	1
Grik2	0.0884984	0.904043	0.272	0.146	1
Setd2	0.0884984	1.67458	0.272	0.146	1
Atad3a	0.0885668	1.00421	0.259	0.122	1
Afap1l2	0.0886365	-0.19105	0.457	0.317	1
Xrn1	0.0886723	2.48914	0.235	0.122	1
Cd9	0.0887114	0.339341	0.938	0.902	1
Lamtor5	0.0887453	0.328334	0.691	0.488	1
Arl8b	0.0888697	1.2864	0.383	0.268	1
Bnip1	0.0889717	0.707417	0.16	0.049	1
Pcdhb9	0.0889717	-2.07464	0.086	0.195	1
Pros1	0.088983	0.179822	0.469	0.366	1
Lactb2	0.0889995	0.893322	0.296	0.171	1
Luc7l3	0.0890919	1.11203	0.519	0.366	1
Efna4	0.0892093	-0.594021	0.025	0.098	1
Evi5l	0.0892093	-1.00362	0.025	0.098	1
Nacad	0.0892093	-0.99287	0.025	0.098	1
Ciart	0.0892824	2.22979	0.148	0.049	1
Tbc1d4	0.0892824	2.34289	0.148	0.049	1
Panx1	0.0892824	2.08935	0.148	0.049	1
Ralgapa1	0.0892824	1.76813	0.148	0.049	1
Asap2	0.0893652	0.253756	0.506	0.317	1
Ptpra	0.0894154	0.607491	0.519	0.341	1
Maip1	0.0894315	1.03771	0.247	0.122	1
Cntfr	0.0894715	0.899839	0.395	0.244	1
Crebzf	0.0895978	1.77872	0.21	0.098	1
Secisbp2l	0.0896949	0.605935	0.506	0.341	1
Sdc4	0.0897788	0.486709	0.864	0.634	1
Nipsnap1	0.0899362	1.30006	0.185	0.073	1
Saysd1	0.0901137	-0.473105	0.494	0.317	1
Ddit3	0.090371	2.88514	0.259	0.146	1
Arid5a	0.0906498	0.825594	0.198	0.073	1
Tbc1d9b	0.0907654	-1.57209	0.333	0.439	1
Tmem185b	0.0907709	-0.865456	0.086	0.195	1
Tmem189	0.0908167	0.691239	0.346	0.195	1
mt-Co1	0.0908259	-0.295534	1	1	1
Pgpep1	0.0908904	1.16954	0.247	0.122	1
Zfhx3	0.0909376	0.632814	0.457	0.317	1
Ppm1l	0.0910126	-2.10418	0.074	0.171	1
Scube1	0.0910126	-1.09918	0.074	0.171	1
St3gal4	0.0911425	1.93564	0.148	0.049	1
Pfas	0.0911425	2.08822	0.148	0.049	1
Tmem161b	0.0911425	2.66003	0.148	0.049	1
Nfkb2	0.0911425	1.71829	0.148	0.049	1
Hmox1	0.0911652	1.61076	0.21	0.098	1
Rpl27a	0.0912564	-0.443786	0.938	0.878	1
Tnfaip1	0.0913401	0.768893	0.309	0.171	1
Fam76a	0.0914109	0.825873	0.444	0.293	1
Pnn	0.0914109	0.894284	0.444	0.293	1
Nme7	0.0916069	0.488502	0.654	0.488	1
Apba3	0.0916134	-2.22065	0.111	0.22	1
Slc29a1	0.0916944	0.82018	0.296	0.171	1
3110009E18Rik	0.0917513	1.50966	0.111	0.024	1
Prune1	0.0917513	2.64584	0.111	0.024	1
Zkscan5	0.0917513	2.15641	0.111	0.024	1
Pias4	0.0917513	1.81202	0.111	0.024	1
Lpar6	0.0917513	2.07707	0.111	0.024	1
L3mbtl2	0.0917513	3.61746	0.111	0.024	1
D17H6S53E	0.0917513	1.98379	0.111	0.024	1
Vegfa	0.0917513	1.93141	0.111	0.024	1
Ttc7	0.0917513	3.24482	0.111	0.024	1
Pkd2l2	0.0917513	1.8543	0.111	0.024	1
Rtp1	0.0919503	-0.137215	0.025	0.024	1
Rpl36a-ps1	0.0919656	-0.77327	0.025	0.098	1
Irgm2	0.0919929	-1.55882	0.185	0.317	1
Ppp1r35	0.092108	0.534882	0.346	0.195	1
Bnip3	0.0921653	3.00386	0.247	0.146	1
Art3	0.092194	0.464591	0.815	0.707	1
Gpr137b	0.0922071	1.43336	0.309	0.195	1
Col5a2	0.0922098	0.606386	0.494	0.341	1
Sirt7	0.0922961	-0.881734	0.099	0.22	1
Susd6	0.0925298	1.75171	0.383	0.268	1
Mef2a	0.0925697	0.847436	0.383	0.244	1
Cd2bp2	0.0925934	-1.08218	0.136	0.268	1
Kdelr3	0.0925993	1.31518	0.16	0.049	1
Comt	0.0926833	-0.154428	0.741	0.585	1
Mpzl1	0.0927547	1.43312	0.21	0.098	1
Ttc23	0.0927547	1.55883	0.21	0.098	1
Npm1	0.0928297	0.164863	0.778	0.634	1
Ndufa10	0.092856	0.477544	0.58	0.39	1
Ufc1	0.0929269	0.455253	0.654	0.537	1
Usp42	0.0929651	-1.65534	0.074	0.171	1
Pfkfb3	0.0930337	1.86184	0.148	0.049	1
Rmnd5b	0.0930663	1.57103	0.296	0.171	1
Hnrnpk	0.093254	0.381625	0.84	0.732	1
Cdk12	0.093469	1.75602	0.358	0.22	1
P4ha1	0.0935753	0.749806	0.494	0.317	1
Crip1	0.0937764	0.268957	0.914	0.854	1
Trappc4	0.0937828	0.377727	0.642	0.512	1
Cotl1	0.0938694	0.456594	0.444	0.317	1
Klf6	0.093915	0.411424	0.667	0.488	1
Pcmt1	0.093962	-0.174659	0.494	0.39	1
Msi1	0.0939661	2.85468	0.111	0.024	1
Cenpw	0.0939661	2.58913	0.111	0.024	1
Mcoln1	0.0939661	1.50316	0.111	0.024	1
Slc45a4	0.0939661	1.90295	0.111	0.024	1
Aifm1	0.0944545	0.691539	0.296	0.171	1
Wdr77	0.0944571	-0.91534	0.086	0.195	1
Car11	0.0944571	-0.714387	0.086	0.195	1
Elovl6	0.0945614	-0.101988	0.543	0.39	1
Nadk2	0.0949561	1.44499	0.148	0.049	1
Rilpl2	0.0949662	0.427201	0.37	0.22	1
Flot2	0.0949662	0.568703	0.37	0.22	1
Actn4	0.0950276	0.87885	0.58	0.415	1
Zup1	0.095043	1.81344	0.185	0.073	1
Tmem251	0.095043	2.25459	0.185	0.073	1
Ncor1	0.0951635	0.451586	0.642	0.415	1
Txndc9	0.0959309	0.726446	0.519	0.366	1
Tpst2	0.0960788	1.00453	0.358	0.22	1
Gtf2f1	0.0960788	0.727836	0.358	0.22	1
Slc9a8	0.0962235	1.94741	0.111	0.024	1
AW146154	0.0962235	2.02128	0.111	0.024	1
Mon1a	0.0962235	1.55335	0.111	0.024	1
Nle1	0.0962235	1.53371	0.111	0.024	1
Wdr20	0.0962235	1.50442	0.111	0.024	1
Wdr27	0.0962235	2.26512	0.111	0.024	1
Tcn2	0.0963255	0.377627	0.568	0.366	1
Paxbp1	0.0965812	1.24975	0.222	0.098	1
Csmd1	0.096807	0.673182	0.605	0.439	1
Hif1a	0.0969039	0.163249	0.42	0.268	1
Dusp1	0.0969039	1.03438	0.407	0.293	1
Snx7	0.0969187	-1.84542	0.16	0.293	1
Wdyhv1	0.0969187	1.10042	0.247	0.122	1
Fam120a	0.097019	-0.931859	0.235	0.366	1
Zfp871	0.0970705	1.45791	0.272	0.146	1
Tmem205	0.0971436	0.312189	0.802	0.683	1
Chpf	0.0971866	0.642367	0.593	0.415	1
Nfkbib	0.0972059	0.987805	0.407	0.268	1
Mrpl4	0.0972059	0.12811	0.407	0.268	1
Cyp4v3	0.0973932	0.194585	0.198	0.073	1
Coq10b	0.0975868	1.00932	0.37	0.22	1
Cdk5rap2	0.0976568	-1.50299	0.136	0.244	1
Asap1	0.0976777	0.986373	0.383	0.244	1
Avl9	0.0978055	1.40481	0.235	0.122	1
Cndp2	0.0980742	-0.118666	0.37	0.195	1
Cox7a2l	0.0982588	0.33728	0.667	0.463	1
Sfr1	0.0982846	-0.113201	0.753	0.537	1
Agpat3	0.0983453	-0.186544	0.58	0.439	1
Pgrmc2	0.0984076	0.292603	0.333	0.171	1
Mrpl3	0.0984231	0.361671	0.42	0.293	1
Ccdc134	0.0985242	2.50291	0.111	0.024	1
Ubc	0.0985539	0.375738	0.864	0.756	1
Carmil1	0.0985747	1.21741	0.185	0.073	1
Ubxn4	0.0985909	0.269864	0.691	0.561	1
Cdipt	0.0987466	0.962008	0.358	0.22	1
Cherp	0.0988965	1.83429	0.148	0.049	1
Kif3c	0.0988965	3.22438	0.148	0.049	1
Ndufs1	0.0989186	0.841628	0.37	0.22	1
Wnk4	0.0990548	1.0238	0.284	0.171	1
Pet100	0.0990563	0.679822	0.642	0.463	1
Maged2	0.0991164	0.406032	0.704	0.561	1
Sarnp	0.0991218	0.546692	0.679	0.512	1
Ttc8	0.0992125	1.876	0.259	0.146	1
Ifngr2	0.0992125	1.47119	0.259	0.146	1
Mycbp2	0.0994505	0.164835	0.42	0.268	1
Ccdc13	0.0995534	1.08433	0.395	0.244	1
Rhob	0.0997732	1.03619	0.543	0.366	1
Lims1	0.100251	0.206244	0.593	0.39	1
Camk2g	0.100532	1.45461	0.284	0.171	1
Gng12	0.100818	0.883681	0.481	0.341	1
Aqp4	0.100844	3.93037	0.062	0.024	1
Kif16b	0.100869	1.37459	0.111	0.024	1
Nars	0.100905	0.189408	0.63	0.439	1
Tcp11l1	0.100915	2.4664	0.148	0.049	1
Slc25a26	0.100915	1.51128	0.148	0.049	1
Qpctl	0.100915	1.57927	0.148	0.049	1
Usp54	0.100915	2.04491	0.148	0.049	1
Bysl	0.100915	1.88025	0.148	0.049	1
Stoml1	0.101038	1.6711	0.21	0.098	1
Commd6	0.101055	0.321546	0.543	0.415	1
Ldb1	0.101144	1.22144	0.309	0.171	1
Xiap	0.101348	0.701869	0.407	0.244	1
Praf2	0.101599	0.522408	0.272	0.146	1
Xpo1	0.101599	1.66942	0.272	0.146	1
Rps24	0.101629	-0.529288	0.951	0.927	1
Tipin	0.101633	0.749508	0.432	0.268	1
Rnf170	0.101646	-0.31456	0.247	0.122	1
Tubb2a	0.101949	1.30087	0.321	0.195	1
AU022252	0.101997	-0.862082	0.123	0.244	1
Ascc2	0.102189	-0.800948	0.086	0.195	1
Ppme1	0.10221	-2.60729	0.111	0.22	1
Ivns1abp	0.102285	0.80789	0.42	0.293	1
Mdm2	0.102309	2.03323	0.259	0.146	1
Rbm39	0.102361	0.215592	0.864	0.732	1
Egln1	0.102568	0.665697	0.444	0.317	1
Zfyve16	0.102966	2.19587	0.148	0.049	1
Ttyh1	0.103112	0.230427	0.914	0.829	1
S100a13	0.103205	0.106238	0.864	0.683	1
Pou3f1	0.103257	1.55501	0.111	0.024	1
Abi3bp	0.103257	2.24529	0.111	0.024	1
Taz	0.103538	1.75315	0.284	0.171	1
Mageh1	0.103755	0.606677	0.432	0.293	1
Afap1	0.104027	1.15175	0.346	0.22	1
Sap30l	0.104027	1.38397	0.346	0.22	1
Cfap36	0.104065	0.189461	0.568	0.39	1
Zfp61	0.104068	1.30505	0.185	0.073	1
Socs6	0.104068	1.74035	0.185	0.073	1
Slc38a9	0.104198	-0.8989	0.086	0.195	1
Opa1	0.104301	1.55633	0.235	0.122	1
Rnf130	0.104537	0.33481	0.654	0.463	1
Cnih1	0.104578	0.372534	0.531	0.366	1
Slc20a2	0.104899	-0.822012	0.16	0.293	1
Crebrf	0.104924	-0.183905	0.395	0.244	1
Ncapg2	0.105051	0.428743	0.148	0.049	1
Zc3h14	0.105206	0.915145	0.519	0.39	1
Mrpl27	0.1053	0.179975	0.568	0.39	1
Rbbp9	0.105611	0.897438	0.383	0.268	1
Haus4	0.10569	1.73876	0.111	0.024	1
Zfp810	0.10569	1.17974	0.111	0.024	1
Osbpl2	0.106239	-0.341908	0.086	0.195	1
Ergic2	0.106267	0.169468	0.42	0.293	1
Klhl42	0.106285	1.10999	0.21	0.098	1
Usp3	0.106285	1.41707	0.21	0.098	1
Npas3	0.106285	1.58791	0.21	0.098	1
Suclg1	0.106302	0.678044	0.58	0.488	1
Ucp2	0.106306	0.877341	0.469	0.317	1
Smim26	0.106487	0.807935	0.444	0.317	1
Gkap1	0.106764	0.439672	0.667	0.537	1
Egr2	0.107095	2.14943	0.173	0.073	1
Mnt	0.107095	1.5973	0.173	0.073	1
Zc3h13	0.107217	0.881344	0.358	0.244	1
Bfar	0.107217	0.610462	0.358	0.244	1
Casz1	0.107504	1.94975	0.037	0	1
Tmem37	0.107509	1.44633	0.062	0	1
Fmn2	0.107509	1.35366	0.062	0	1
Bend7	0.107509	1.45052	0.062	0	1
1700007K13Rik	0.107509	1.25749	0.062	0	1
Chgb	0.107509	1.92608	0.062	0	1
Zhx3	0.107509	2.23969	0.062	0	1
Rnf113a1	0.107509	1.2891	0.062	0	1
Slc25a53	0.107509	1.20916	0.062	0	1
Kcne1l	0.107509	1.77786	0.062	0	1
Bbs7	0.107509	1.16187	0.062	0	1
Trim46	0.107509	3.03341	0.062	0	1
H2ac18	0.107509	1.01076	0.062	0	1
Dclre1b	0.107509	2.18727	0.062	0	1
Zbtb5	0.107509	1.0452	0.062	0	1
Slc35d1	0.107509	1.95965	0.062	0	1
Ccdc163	0.107509	1.83201	0.062	0	1
Dhrs3	0.107509	2.1611	0.062	0	1
Cenpa	0.107509	1.36008	0.062	0	1
Trmt44	0.107509	1.43646	0.062	0	1
Fam47e	0.107509	1.31067	0.062	0	1
Ccdc158	0.107509	1.63332	0.062	0	1
Cabp1	0.107509	2.40184	0.062	0	1
Rbak	0.107509	0.728027	0.062	0	1
Nap1l5	0.107509	1.04424	0.062	0	1
Lrrn1	0.107509	0.5443	0.062	0	1
Hdhd5	0.107509	3.05325	0.062	0	1
Gpr162	0.107509	0.654814	0.062	0	1
Fam234b	0.107509	0.86114	0.062	0	1
Gm45844	0.107509	1.33967	0.062	0	1
BC024978	0.107509	1.3788	0.062	0	1
Nars2	0.107509	1.12302	0.062	0	1
Aqp11	0.107509	1.07471	0.062	0	1
Dgat2	0.107509	1.43035	0.062	0	1
Xndc1	0.107509	2.28371	0.062	0	1
Mgmt	0.107509	1.873	0.062	0	1
Mcm9	0.107509	1.08598	0.062	0	1
Gm4924	0.107509	1.36712	0.062	0	1
Gas6	0.107509	3.13112	0.062	0	1
Zfp882	0.107509	1.72059	0.062	0	1
Ndrg4	0.107509	0.984745	0.062	0	1
Rrad	0.107509	1.27396	0.062	0	1
Tm9sf1	0.107509	2.04552	0.062	0	1
Arhgap42	0.107509	1.33478	0.062	0	1
Hyls1	0.107509	0.94958	0.062	0	1
Msantd2	0.107509	2.00722	0.062	0	1
Olfr889	0.107509	1.49993	0.062	0	1
Abcg4	0.107509	0.937453	0.062	0	1
2810021J22Rik	0.107509	2.58101	0.062	0	1
Efnb3	0.107509	1.72937	0.062	0	1
Vmo1	0.107509	1.45481	0.062	0	1
Rab11fip4	0.107509	1.27792	0.062	0	1
Pfkp	0.107509	2.51581	0.062	0	1
Zfp729b	0.107509	1.8955	0.062	0	1
Fkbp1b	0.107509	1.55782	0.062	0	1
Nol10	0.107509	1.48403	0.062	0	1
Scin	0.107509	1.75045	0.062	0	1
Slc38a6	0.107509	1.21786	0.062	0	1
Zfyve26	0.107509	1.13834	0.062	0	1
Egflam	0.107509	2.22205	0.062	0	1
Gsdmd	0.107509	1.31817	0.062	0	1
Itga5	0.107509	1.71971	0.062	0	1
H2-Q6	0.107509	2.05565	0.062	0	1
Zfp119b	0.107509	1.31485	0.062	0	1
Ticam1	0.107509	1.63024	0.062	0	1
Adrb2	0.107509	1.74255	0.062	0	1
Rasgrp2	0.107509	1.05599	0.062	0	1
Mbl2	0.107509	1.90962	0.062	0	1
Dlx5	0.107509	0.952655	0.049	0	1
Syt1	0.107509	1.3483	0.049	0	1
Kcmf1	0.10754	0.493999	0.481	0.366	1
Fam222b	0.107591	-1.24066	0.074	0.171	1
Chmp7	0.107675	1.02123	0.235	0.122	1
Rtl8a	0.107694	-1.04057	0.296	0.439	1
Sumo2	0.107863	0.11302	0.877	0.756	1
Snx21	0.107878	1.94698	0.296	0.195	1
Brk1	0.107925	0.236845	0.667	0.512	1
Emc10	0.108248	0.223741	0.79	0.537	1
Ifrd1	0.108501	0.64256	0.469	0.366	1
Gns	0.108568	0.984236	0.37	0.268	1
Ulk2	0.108731	1.46701	0.259	0.146	1
Kmt2c	0.108782	0.236648	0.346	0.195	1
Gm5617	0.108782	0.778902	0.346	0.195	1
Gstt1	0.108788	0.221156	0.605	0.439	1
Tep1	0.108793	-1.72218	0.062	0.146	1
Paip1	0.108989	1.27282	0.42	0.293	1
Ifit1	0.109191	0.675569	0.691	0.561	1
Pex14	0.109268	1.17758	0.296	0.171	1
Acap2	0.109268	0.670052	0.296	0.171	1
Kantr	0.10932	0.712573	0.148	0.049	1
Rusc1	0.10932	1.01247	0.148	0.049	1
Nbas	0.10932	1.183	0.148	0.049	1
Sema4a	0.109373	0.722573	0.37	0.244	1
Btbd2	0.109415	1.75321	0.247	0.146	1
Aup1	0.109421	1.58276	0.296	0.195	1
Acox3	0.109519	0.661605	0.272	0.146	1
Sh3bgrl	0.109555	1.30038	0.519	0.366	1
Gng8	0.109573	-1.48701	0.568	0.61	1
Vps45	0.109764	1.62739	0.284	0.171	1
Leng1	0.109801	1.32234	0.185	0.073	1
Ptger1	0.109821	-1.24201	0.074	0.171	1
Rdh14	0.109824	-0.59432	0.346	0.22	1
Zdhhc18	0.109901	1.75935	0.21	0.098	1
Crcp	0.109901	1.11076	0.21	0.098	1
Sntb2	0.11044	0.123321	0.543	0.39	1
Anxa6	0.110524	0.91322	0.444	0.317	1
Eef1b2	0.110532	0.31396	0.852	0.659	1
Nolc1	0.110621	0.229038	0.333	0.195	1
Ralbp1	0.110689	1.09523	0.506	0.366	1
Rita1	0.110694	1.04931	0.111	0.024	1
Zfp235	0.110694	0.603214	0.111	0.024	1
Acads	0.110751	0.344267	0.346	0.244	1
Apobec1	0.110974	-1.3082	0.099	0.195	1
Rpl23	0.110999	-0.347149	0.951	0.902	1
Smad4	0.111067	0.551771	0.432	0.268	1
Tmem185a	0.111074	1.61074	0.173	0.073	1
Nvl	0.111102	1.54525	0.247	0.146	1
Srd5a2	0.111135	1.2357	0.235	0.122	1
Tob2	0.11116	1.80939	0.272	0.146	1
Elp6	0.11122	-1.57827	0.062	0.146	1
Josd2	0.111644	0.802766	0.654	0.537	1
Hibch	0.111652	1.15366	0.247	0.122	1
Fut8	0.111652	1.05666	0.247	0.122	1
Ash2l	0.111745	0.943733	0.21	0.098	1
Ift27	0.111804	0.513209	0.469	0.293	1
Calm1	0.111866	0.387494	0.914	0.756	1
Pnpla8	0.112016	-0.181283	0.506	0.366	1
Rragc	0.112019	0.468239	0.407	0.268	1
B230217C12Rik	0.112167	-0.869376	0.148	0.268	1
Oasl2	0.112177	0.797329	0.494	0.341	1
Ap2s1	0.112181	-0.324267	0.642	0.439	1
Pex2	0.112189	0.125784	0.519	0.366	1
Ckb	0.112219	0.117816	0.951	0.902	1
Mrps28	0.112303	0.613614	0.556	0.415	1
Gng11	0.11238	-0.375395	0.519	0.415	1
Tcf12	0.112404	0.876516	0.321	0.195	1
Lamp1	0.112479	0.193641	0.914	0.78	1
Ccny	0.112561	-0.707138	0.222	0.341	1
Tmem9b	0.112681	0.857712	0.383	0.268	1
Vma21	0.112685	0.570661	0.494	0.39	1
Commd1	0.112717	0.618322	0.654	0.488	1
Fam8a1	0.11282	0.243391	0.272	0.146	1
Tsn	0.112954	0.289994	0.667	0.537	1
Uqcrc2	0.112954	0.33689	0.667	0.537	1
Tsg101	0.112974	0.311361	0.519	0.39	1
Vta1	0.112974	0.808911	0.519	0.39	1
Cpeb2	0.113049	0.833368	0.37	0.22	1
C4b	0.113181	-0.70028	0.815	0.756	1
Rdh10	0.113264	0.687943	0.111	0.024	1
Pmpcb	0.113282	0.347096	0.432	0.293	1
Akirin1	0.113303	0.287446	0.346	0.195	1
Coq5	0.113356	0.951375	0.309	0.171	1
Rrp8	0.113392	1.08061	0.247	0.122	1
Pkd1	0.113657	-1.74848	0.185	0.317	1
Stk3	0.11369	-1.65606	0.062	0.146	1
Pcif1	0.113874	0.109158	0.457	0.317	1
Alx3	0.11424	0.506962	0.691	0.512	1
Echdc2	0.114392	-1.96699	0.074	0.171	1
Ctnnd1	0.114398	0.12551	0.481	0.293	1
Ube2v2	0.114398	0.289939	0.469	0.317	1
Pcgf5	0.114626	1.65294	0.284	0.171	1
Ift57	0.114894	0.695805	0.407	0.268	1
Emc4	0.115021	0.187652	0.543	0.415	1
Tfdp2	0.115061	1.43654	0.272	0.171	1
Slc35b2	0.115203	0.730008	0.593	0.463	1
Fxr1	0.115253	-1.23306	0.272	0.39	1
Tbpl1	0.115507	1.06609	0.21	0.098	1
Eif3d	0.115584	0.787742	0.481	0.366	1
Per3	0.115611	1.70629	0.383	0.268	1
Isca2	0.115622	-0.302822	0.42	0.244	1
Nudt16l1	0.115801	1.90875	0.222	0.122	1
Guk1	0.115811	0.308094	0.63	0.439	1
Osbpl9	0.115873	0.254341	0.346	0.22	1
Bcdin3d	0.116203	-1.99344	0.062	0.146	1
Asxl2	0.116489	1.37963	0.235	0.122	1
Ppp1r8	0.116733	-0.762502	0.074	0.171	1
G2e3	0.116733	2.10858	0.136	0.049	1
Larp1	0.116765	1.36465	0.395	0.268	1
Htatip2	0.116883	2.54637	0.198	0.098	1
Dctn6	0.116969	0.944072	0.481	0.366	1
[truncated: 9,779 more rows]

## Sheet: 4 Fibroblasts-male vs female
Gene	p value	Average log2 fold change	Fraction of cells expressing the gene in male cluster	Fraction of cells expressing the gene in female cluster	Adjusted p value
Ddx3y	5.42312e-10	5.57371	0.541	0	1.18522e-05
Glul	5.67722e-08	1.67759	0.837	0.449	0.00124076
Ccn2	1.01528e-07	2.14992	0.837	0.531	0.00221889
Tsc22d3	1.42456e-07	1.87799	0.745	0.306	0.00311337
Sgk1	3.33206e-07	2.5356	0.643	0.224	0.00728221
Arid5b	5.84397e-07	1.49258	0.796	0.51	0.012772
Ccn1	6.71671e-07	1.64023	0.867	0.592	0.0146794
Eif2s3y	5.48966e-06	4.42084	0.337	0	0.119976
Dynll1	5.96147e-06	-0.8188	0.898	0.939	0.130288
Rbpms	6.01654e-06	1.49437	0.776	0.531	0.131492
Ubb	6.8004e-06	0.571906	0.969	0.898	0.148623
Per1	9.29686e-06	2.89624	0.439	0.082	0.203183
Twist1	5.09506e-05	1.09444	0.806	0.51	1
Ubc	5.78775e-05	0.816946	0.949	0.776	1
Ckap4	7.6477e-05	-1.10089	0.582	0.776	1
Ociad2	8.50712e-05	3.52335	0.327	0.041	1
Ccdc85b	9.95526e-05	1.05744	0.816	0.551	1
Eif4b	0.000101415	2.04989	0.48	0.143	1
Fibin	0.000126648	1.7994	0.408	0.082	1
Grina	0.000143669	1.27146	0.735	0.469	1
Rplp2	0.000179758	-0.492012	0.939	0.939	1
Ephx1	0.00018394	1.32562	0.531	0.204	1
Txnip	0.000203651	1.04371	0.786	0.49	1
Creb3l1	0.000214874	-1.76669	0.276	0.531	1
Anxa7	0.000229733	1.41958	0.622	0.306	1
Iah1	0.000253278	0.949854	0.643	0.286	1
Rgcc	0.000259223	2.2139	0.439	0.143	1
Sag	0.000273565	-3.41407	0.01	0.163	1
Klhdc8b	0.000297469	3.87256	0.265	0.02	1
Sfswap	0.000311763	3.44531	0.265	0.02	1
Atp1a2	0.000322186	1.41786	0.449	0.143	1
Rps2	0.000384412	-0.522373	0.949	0.939	1
Map1lc3b	0.000400479	0.721436	0.888	0.776	1
Angptl7	0.000418209	1.91273	0.5	0.224	1
Trub2	0.000434809	-3.79474	0	0.122	1
Zeb2	0.000453561	-1.38979	0.337	0.592	1
Klf15	0.000488811	2.7093	0.286	0.041	1
Fbln7	0.000518582	4.43226	0.214	0	1
Per3	0.000519821	1.41458	0.571	0.224	1
Dbp	0.000525008	0.732759	0.827	0.49	1
Gadd45b	0.000547884	0.799455	0.694	0.367	1
Sord	0.000556874	1.89281	0.49	0.224	1
Rgs2	0.000630995	2.49858	0.316	0.061	1
Arrdc3	0.000641624	1.49044	0.48	0.184	1
Lima1	0.000657055	0.873624	0.827	0.612	1
Cys1	0.000687597	1.40625	0.51	0.204	1
Pigp	0.000694688	1.10293	0.704	0.469	1
Rad21	0.000699278	1.28806	0.51	0.204	1
Thbs1	0.00071106	1.92981	0.459	0.163	1
Ctdspl	0.000712225	1.28758	0.622	0.327	1
Klf9	0.000712621	0.791397	0.939	0.694	1
Atp5g1	0.000712989	-0.912442	0.796	0.816	1
Actn4	0.000717907	0.99389	0.776	0.51	1
Ctsk	0.000794798	0.671621	0.908	0.796	1
Aldh1a1	0.000827885	2.17668	0.408	0.143	1
Nbl1	0.00085131	0.931486	0.929	0.776	1
Zyx	0.000853228	1.23885	0.643	0.367	1
Fst	0.00087294	1.60112	0.582	0.286	1
Rbm3	0.000886223	-0.640182	0.878	0.918	1
Sypl	0.000897524	1.44396	0.388	0.102	1
Cnn2	0.000942116	0.985086	0.765	0.571	1
Vasp	0.000963048	0.258656	0.418	0.122	1
Itih5	0.000964101	0.165204	0.592	0.327	1
Smarca2	0.000967744	0.758618	0.827	0.551	1
Phf2	0.000997023	3.09671	0.235	0.02	1
Megf10	0.0010115	-2.66341	0.01	0.143	1
Rora	0.00101595	0.927061	0.541	0.245	1
Htt	0.00112667	-2.64309	0.051	0.224	1
Trappc9	0.00114171	3.17209	0.235	0.02	1
Rps11	0.00114405	-0.419895	0.959	0.959	1
Cnot6l	0.00115019	1.60315	0.367	0.102	1
Tmem18	0.00116974	3.37216	0.224	0.02	1
Rspo1	0.00117626	2.22052	0.367	0.122	1
Abhd8	0.00117818	1.84541	0.429	0.163	1
Mmp13	0.00120937	-2.62225	0.061	0.245	1
Clu	0.00121044	1.65888	0.653	0.429	1
Spp1	0.00130439	-2.4006	0.061	0.245	1
Tgfb1i1	0.00131396	1.13224	0.653	0.408	1
Hpgd	0.001329	-2.29065	0.071	0.265	1
Ubqln4	0.00134048	-2.48502	0.041	0.204	1
Slitrk6	0.00137738	-4.30653	0	0.102	1
Rin2	0.00141609	0.685192	0.582	0.286	1
Ier3	0.00142724	0.862248	0.786	0.571	1
Cmbl	0.00147164	1.80534	0.378	0.122	1
Krtcap2	0.00148295	-0.71052	0.806	0.878	1
1110012L19Rik	0.00158561	1.59219	0.306	0.061	1
Csrp1	0.00164292	0.989893	0.786	0.551	1
Sec61g	0.00165416	-0.446099	0.939	0.898	1
Actg1	0.00165692	0.561841	0.98	0.898	1
Bmp7	0.00167273	1.09157	0.388	0.122	1
Rps17	0.00167643	-0.468121	0.918	0.918	1
Islr	0.00170638	0.572706	0.857	0.633	1
Man1a2	0.00175192	0.58322	0.551	0.265	1
Plin3	0.00180908	1.39054	0.449	0.184	1
Ebag9	0.00182654	2.69661	0.245	0.041	1
Srf	0.00183783	3.06337	0.214	0.02	1
Plekhh2	0.00184988	2.62637	0.276	0.061	1
P2ry14	0.00186869	1.43615	0.449	0.184	1
Map3k8	0.00191364	2.25017	0.255	0.041	1
Bglap	0.00200418	0.186662	0.051	0.224	1
Tmtc4	0.00208218	3.76125	0.173	0	1
Dtna	0.0021484	2.62783	0.214	0.02	1
C1qtnf2	0.00220261	1.38948	0.418	0.163	1
Rbp1	0.00228527	0.847019	0.857	0.694	1
Gfpt2	0.00229518	2.97396	0.245	0.041	1
Kdm5c	0.00234283	-1.65253	0.112	0.306	1
Farp2	0.0024546	-4.40513	0.01	0.122	1
Gnao1	0.00259303	0.676831	0.469	0.163	1
Ibsp	0.00261281	-2.34781	0.071	0.245	1
Zfp608	0.00262723	2.14928	0.276	0.061	1
Lgals9	0.00271953	0.967739	0.418	0.163	1
Arap2	0.00274675	2.52433	0.235	0.041	1
Kmt2e	0.00281648	1.05498	0.735	0.51	1
Fyttd1	0.00284846	1.59059	0.439	0.204	1
Dnajc1	0.0028619	0.712176	0.663	0.408	1
Rpl41	0.00287101	-0.329154	0.98	0.939	1
Igfbp5	0.0028799	1.00017	0.898	0.694	1
Apool	0.00292412	3.79793	0.163	0	1
Adrb2	0.00294708	-2.80549	0.01	0.122	1
Kif1c	0.00297706	2.47968	0.296	0.082	1
Grn	0.00299008	0.724989	0.847	0.612	1
Nudt16	0.00305912	-3.11891	0.02	0.143	1
Gpm6b	0.00324081	1.00971	0.551	0.286	1
Kbtbd7	0.00327	-2.22884	0.051	0.204	1
Aplp1	0.00327212	3.12088	0.163	0.02	1
Hspa5	0.00329639	-0.739257	0.878	0.878	1
Zfp462	0.00330059	1.52345	0.276	0.061	1
Ppp1r12a	0.00330578	1.29375	0.724	0.449	1
Extl2	0.00332175	2.2188	0.265	0.061	1
Megf8	0.00334498	2.26252	0.204	0.02	1
Rcan2	0.00334796	3.30336	0.194	0.02	1
Pdgfra	0.00336	0.698707	0.857	0.735	1
Cpm	0.00346132	2.86876	0.255	0.061	1
Abl1	0.00348523	1.30006	0.408	0.163	1
S1pr3	0.00353519	1.2952	0.398	0.143	1
Actn1	0.00359106	0.893796	0.776	0.633	1
Tmx4	0.00365017	1.75048	0.388	0.163	1
Lox	0.0036637	-0.825513	0.633	0.776	1
Flywch2	0.00372216	1.94045	0.265	0.061	1
Bglap2	0.00376795	-1.13563	0.061	0.224	1
Tmem204	0.00378139	1.43866	0.459	0.224	1
Il34	0.00379301	1.86322	0.265	0.061	1
Igsf8	0.00393079	1.29335	0.612	0.367	1
Wnk4	0.0039416	2.10932	0.286	0.082	1
Satb2	0.00394731	-3.12427	0.031	0.163	1
Gstp1	0.0039856	1.01668	0.571	0.306	1
Grk6	0.00399343	2.5783	0.194	0.02	1
Rrbp1	0.00402144	-0.777353	0.837	0.837	1
Pink1	0.00403627	1.07471	0.582	0.347	1
Sptan1	0.00405261	0.432489	0.622	0.388	1
Ptprz1	0.00406937	-2.19071	0.02	0.143	1
Gnpda2	0.00408236	1.13505	0.5	0.245	1
Slc49a4	0.0041408	1.50674	0.469	0.245	1
Nr1d2	0.00421023	0.768372	0.622	0.347	1
Abca1	0.00422038	0.710247	0.52	0.245	1
Tsc2	0.00427398	2.42532	0.224	0.041	1
Prokr1	0.00436763	-3.78142	0	0.082	1
Arntl	0.00436763	-3.5784	0	0.082	1
Slc36a2	0.00436763	-3.58891	0	0.082	1
Rbp4	0.00436763	-4.62892	0	0.082	1
Ypel3	0.00436796	0.844735	0.857	0.735	1
Camk2n1	0.00437554	0.507361	0.735	0.612	1
Tmem65	0.00442816	0.983737	0.418	0.163	1
Nrip1	0.00442816	1.25181	0.418	0.163	1
Rprd2	0.00448799	1.39344	0.265	0.061	1
Slco3a1	0.00451517	0.737826	0.551	0.327	1
Per2	0.00457193	1.62347	0.265	0.061	1
Tnc	0.00464876	-2.11493	0.082	0.245	1
Sem1	0.00465636	-0.666868	0.918	0.918	1
Tmem47	0.00472661	1.27283	0.5	0.265	1
Manf	0.00481624	-1.00377	0.724	0.816	1
Lrpap1	0.00494992	0.608208	0.816	0.571	1
Amn1	0.0049686	3.5845	0.184	0.02	1
Pik3r1	0.0049996	0.897422	0.673	0.429	1
Fam193b	0.00511445	2.06521	0.224	0.041	1
Nrbp2	0.00514986	1.35291	0.51	0.286	1
Daam1	0.00517349	3.014	0.245	0.061	1
Vcl	0.00518138	0.734031	0.776	0.531	1
Rab6b	0.00518726	1.42104	0.327	0.102	1
Col12a1	0.00552403	-0.30159	0.52	0.224	1
Nsmce1	0.00557486	1.98975	0.337	0.122	1
Dpep1	0.00559695	1.16232	0.602	0.408	1
Nip7	0.00563644	-1.26317	0.184	0.388	1
Scarf2	0.0056577	0.791919	0.724	0.531	1
Bpgm	0.0056718	1.38368	0.602	0.408	1
Plekhb2	0.00572008	3.04719	0.143	0	1
Ptges3l	0.00572008	3.04485	0.143	0	1
Rfx3	0.00572008	3.52946	0.143	0	1
Ptprs	0.00573178	0.55933	0.714	0.429	1
Yaf2	0.00574141	1.255	0.49	0.245	1
Sec61b	0.0057871	-0.526623	0.806	0.837	1
Nfat5	0.00579405	0.863714	0.541	0.286	1
Itm2c	0.00580342	0.540548	0.857	0.755	1
Slc7a2	0.00585806	1.22125	0.571	0.327	1
Tmem42	0.00586622	-2.28058	0.092	0.245	1
Snai1	0.00590254	-1.72251	0.071	0.224	1
Tomm34	0.00591411	1.02622	0.418	0.184	1
Fip1l1	0.00600262	1.053	0.418	0.184	1
Fuca1	0.00603089	0.651744	0.816	0.592	1
Kctd10	0.00603285	1.28525	0.449	0.204	1
Mrps17	0.00610189	1.36919	0.531	0.347	1
S100a4	0.00612943	-1.42687	0.347	0.551	1
Entr1	0.00624249	1.46094	0.337	0.122	1
Col24a1	0.00629809	1.68787	0.306	0.102	1
Tpm1	0.00631478	0.655502	0.898	0.755	1
Me1	0.00634302	2.26597	0.214	0.041	1
Klf6	0.00651814	1.02201	0.684	0.51	1
Ssr4	0.00652268	-0.581097	0.888	0.878	1
Mmp16	0.0065362	-2.45462	0.133	0.306	1
Rps28	0.00664327	-0.306549	0.959	0.939	1
Rdh10	0.00664628	1.66791	0.378	0.163	1
Palld	0.00667501	0.779192	0.694	0.531	1
Cemip	0.00669697	0.290924	0.388	0.143	1
Btg2	0.00671367	0.943433	0.796	0.612	1
Pdlim2	0.00687382	0.74507	0.765	0.592	1
Kmt2b	0.0069731	2.59725	0.204	0.041	1
Aldh3a1	0.00697388	1.75367	0.316	0.102	1
Mxd4	0.0070537	0.583474	0.786	0.571	1
Enpp5	0.00715356	1.59881	0.398	0.184	1
Dld	0.00722441	-1.01004	0.224	0.449	1
Mtmr9	0.00727451	1.70426	0.214	0.041	1
Dync2h1	0.00728313	1.29597	0.255	0.061	1
Cygb	0.00730797	0.634953	0.684	0.469	1
Car13	0.00738823	-0.671334	0.235	0.449	1
a	0.00754812	2.58231	0.204	0.041	1
Rras	0.00759407	0.567905	0.786	0.551	1
Cbr1	0.0076499	1.14274	0.408	0.184	1
Sec14l1	0.00768048	1.94212	0.337	0.143	1
Alkbh3	0.00768459	1.50434	0.255	0.061	1
Stk17b	0.00770423	1.35999	0.561	0.388	1
Tmem37	0.00774022	0.632416	0.816	0.592	1
Acta2	0.00775151	1.26877	0.694	0.551	1
Tmem158	0.00785895	1.15226	0.49	0.265	1
Mrvi1	0.00790268	1.6542	0.327	0.122	1
Coq10b	0.00790629	1.27469	0.48	0.265	1
Lrrn1	0.00793125	-5.15765	0.01	0.102	1
Armc6	0.00793125	-3.45898	0.01	0.102	1
Abhd18	0.00797154	3.69207	0.133	0	1
Pdss2	0.00797154	2.97953	0.133	0	1
Gmpr2	0.00810876	2.21271	0.235	0.061	1
Fkbp5	0.0081653	2.50026	0.204	0.041	1
Spg21	0.00824643	0.948817	0.633	0.408	1
Ccnh	0.00833211	1.43305	0.306	0.102	1
Tmcc1	0.00844678	1.6075	0.296	0.102	1
Rpl38	0.00848764	-0.215091	0.949	0.959	1
Anapc2	0.00849799	1.82047	0.327	0.143	1
Cirbp	0.00850309	0.603695	0.776	0.51	1
Cgref1	0.00850726	-3.03715	0.031	0.143	1
Adgra2	0.0085995	0.980705	0.663	0.408	1
Otulinl	0.00869332	1.07314	0.51	0.306	1
Gtf2e2	0.00871248	2.15349	0.265	0.082	1
Usp22	0.00874667	1.51669	0.306	0.102	1
Mier2	0.00881818	-2.39479	0.01	0.102	1
Fosl2	0.00883164	1.53954	0.418	0.224	1
Rnf10	0.00888329	0.647433	0.592	0.327	1
Tcp11l2	0.00889095	1.39583	0.408	0.204	1
Fbxl22	0.00889586	2.34041	0.173	0.02	1
Nampt	0.00893201	1.15845	0.5	0.265	1
Strn4	0.00902868	1.83515	0.306	0.122	1
Nr4a1	0.00907288	1.16485	0.551	0.347	1
Col25a1	0.00913294	-2.12678	0.01	0.102	1
Ephb1	0.00913294	-2.22291	0.01	0.102	1
Runx3	0.00924111	-3.13371	0.031	0.143	1
Foxp2	0.00924111	-2.85412	0.031	0.143	1
Pcmt1	0.00926316	-0.102399	0.541	0.286	1
Nr2f1	0.00934229	0.49059	0.439	0.184	1
Aatf	0.00948735	-2.17634	0.051	0.184	1
Atp6v1a	0.00962336	1.05795	0.439	0.224	1
Slf2	0.00967695	1.43691	0.173	0.02	1
Armcx5	0.0097047	2.76007	0.163	0.02	1
Dmp1	0.00971233	-1.56813	0.051	0.184	1
Dctn2	0.00985575	0.43479	0.694	0.449	1
Gna13	0.00988915	-0.64636	0.214	0.429	1
Mbnl2	0.00998216	0.678636	0.724	0.571	1
Kank1	0.0100325	1.45926	0.367	0.163	1
Snrpf	0.0100612	-0.692465	0.704	0.735	1
Plekha3	0.0100669	1.33036	0.286	0.102	1
Clock	0.0101031	-1.57175	0.184	0.347	1
Gpx1	0.0101279	0.473523	0.908	0.776	1
St3gal1	0.0101766	-1.85647	0.051	0.184	1
Snx18	0.0101806	0.965139	0.367	0.163	1
Bmp8a	0.0102853	-2.4853	0.02	0.122	1
Mllt1	0.0102905	-2.00058	0.041	0.163	1
Chmp7	0.0102967	2.38224	0.204	0.041	1
Ssb	0.0105131	0.776253	0.714	0.531	1
Macf1	0.0105815	0.581813	0.612	0.388	1
Zbtb18	0.0105904	-0.708815	0.031	0.143	1
Hadhb	0.0105904	1.16166	0.459	0.245	1
Zfp618	0.0106606	-1.60811	0.051	0.184	1
Fam174a	0.0106831	0.387214	0.612	0.429	1
Mrpl46	0.0106928	2.29172	0.194	0.041	1
Klf2	0.0107071	1.06935	0.755	0.551	1
Myo1e	0.0107294	1.17183	0.5	0.286	1
Selenbp1	0.0107539	1.06967	0.49	0.286	1
Tgfb2	0.0107927	1.10369	0.378	0.143	1
Plekhh3	0.0108141	2.28992	0.235	0.061	1
Zfyve19	0.011029	2.63984	0.163	0.02	1
Rps12	0.011029	-0.413215	0.949	0.918	1
Lrrc40	0.0110869	3.11636	0.122	0	1
Mettl27	0.0110869	2.78614	0.122	0	1
Clstn2	0.0110869	3.42964	0.122	0	1
Ctc1	0.0110869	3.13756	0.122	0	1
Rundc3a	0.0110869	4.19584	0.122	0	1
Cst6	0.0110869	4.06884	0.122	0	1
Ddx5	0.0111407	0.496261	0.918	0.898	1
Nexn	0.0111945	1.30908	0.429	0.224	1
Gpx4	0.0111993	0.36769	0.949	0.816	1
Rpl12	0.0112375	-0.524048	0.878	0.898	1
Sipa1	0.0112647	2.50389	0.163	0.02	1
Wbp2	0.0114986	1.1253	0.459	0.265	1
Gucy1b1	0.0115048	3.26089	0.163	0.02	1
Scap	0.0115428	1.25603	0.327	0.143	1
Rpl27	0.0115456	-0.390575	0.939	0.878	1
Abca8a	0.0115511	3.32535	0.194	0.041	1
Alox5ap	0.0115613	0.963387	0.255	0.082	1
Sgcb	0.0117536	1.19131	0.449	0.245	1
Lama2	0.0117618	0.182392	0.541	0.306	1
Podnl1	0.0117931	-1.76041	0.031	0.143	1
Flot2	0.0118106	0.926703	0.439	0.224	1
Ube2k	0.0118832	-0.860166	0.469	0.694	1
Cacna2d1	0.0119269	1.22491	0.388	0.184	1
Epha3	0.0119732	0.665426	0.612	0.388	1
Dhps	0.0122099	1.48564	0.286	0.102	1
Klhl7	0.0122195	-1.19517	0.173	0.347	1
Hsd17b11	0.0122333	0.486402	0.765	0.49	1
Rps19	0.0122553	-0.519189	0.939	0.959	1
Igfbp4	0.0122622	0.603906	0.99	1	1
Ip6k2	0.0122991	2.54742	0.265	0.102	1
Bccip	0.0123727	-0.998096	0.347	0.51	1
Rps13	0.0123917	-0.343823	0.939	0.918	1
Rab3il1	0.0124683	0.651588	0.367	0.163	1
Itih2	0.0125114	1.79037	0.163	0.02	1
Cnn3	0.0126004	0.527828	0.929	0.755	1
Cox6b1	0.0126004	-0.544898	0.888	0.837	1
Arpc1a	0.0126313	0.711312	0.612	0.408	1
Crebzf	0.0126653	1.52746	0.235	0.061	1
Utp15	0.0127096	2.09923	0.194	0.041	1
Rps10	0.0127472	-0.64003	0.878	0.857	1
Itgb8	0.012798	2.11128	0.224	0.061	1
Ly6e	0.0128325	0.552011	0.827	0.735	1
Igfbp2	0.0128998	0.553197	0.786	0.612	1
Dgkd	0.0129623	-1.5476	0.082	0.224	1
Axl	0.0129995	0.529996	0.755	0.531	1
Akr1b3	0.0130648	0.904158	0.388	0.163	1
Htra1	0.0130704	0.672952	0.888	0.714	1
Mt2	0.0131455	2.01729	0.316	0.122	1
Cgrrf1	0.0131866	0.967218	0.469	0.224	1
Lman1	0.0132056	-0.787715	0.684	0.755	1
Rusc2	0.0132271	0.544267	0.398	0.184	1
Arhgef12	0.0133212	0.821461	0.673	0.429	1
Gpx3	0.0133714	-1.07333	0.133	0.306	1
Klhl24	0.0134109	1.12134	0.398	0.184	1
Bckdk	0.0134423	1.19212	0.337	0.143	1
Nid1	0.0134989	0.367361	0.755	0.571	1
Cpe	0.0135126	0.339924	0.969	0.857	1
Lrrk1	0.0135807	1.22543	0.367	0.163	1
Fam76b	0.0136586	1.49779	0.255	0.082	1
Map1lc3a	0.0137141	0.595739	0.898	0.714	1
H2ax	0.0138106	1.61315	0.235	0.061	1
Hipk3	0.0138417	1.10261	0.337	0.143	1
Ivd	0.0139039	1.29858	0.265	0.082	1
2310022B05Rik	0.0139055	1.11119	0.388	0.184	1
Slc5a3	0.0139518	1.72011	0.306	0.122	1
Chrna1	0.0139753	-3.78715	0	0.061	1
Nudt17	0.0139753	-3.82525	0	0.061	1
Rhbdl2	0.0139753	-4.48995	0	0.061	1
Hdhd5	0.0139753	-3.75815	0	0.061	1
Kcnk6	0.0139753	-3.49206	0	0.061	1
Gins2	0.0139753	-3.10969	0	0.061	1
Mvd	0.0139753	-2.74386	0	0.061	1
Ostn	0.0139753	-2.97962	0	0.061	1
Zfp760	0.0139753	-3.76388	0	0.061	1
Rttn	0.0139753	-3.55916	0	0.061	1
Smc3	0.0139991	-1.04182	0.337	0.531	1
Pip5k1c	0.0140504	-1.38486	0.122	0.286	1
Rpl23a	0.0140994	-0.522006	0.888	0.898	1
H1f0	0.0141362	0.796337	0.602	0.367	1
Fbxo33	0.0142948	1.28037	0.286	0.102	1
Fam241a	0.0143424	2.70587	0.214	0.061	1
Lims2	0.0143501	1.50425	0.255	0.082	1
Nrep	0.0143779	0.891621	0.531	0.327	1
Tbl1x	0.014428	1.29999	0.429	0.245	1
Uba2	0.0144714	0.237826	0.52	0.286	1
Sirt7	0.014503	1.03445	0.296	0.102	1
Angel2	0.0145146	1.23276	0.398	0.204	1
Fam214a	0.0145429	2.85097	0.153	0.02	1
Ctdsp2	0.0145817	0.727408	0.724	0.571	1
Rflnb	0.0147538	1.39393	0.51	0.327	1
Ubac2	0.0148281	1.40211	0.255	0.082	1
Nptn	0.0148288	0.41711	0.878	0.735	1
Stard3	0.0148345	1.24733	0.265	0.082	1
Ror2	0.0149788	1.00657	0.286	0.102	1
Ly6a	0.0149988	0.556817	0.776	0.612	1
Crtc2	0.015056	1.97666	0.194	0.041	1
Parn	0.015056	1.7715	0.194	0.041	1
Sort1	0.0150779	2.34943	0.184	0.041	1
Chn1	0.015167	2.75317	0.153	0.02	1
Abhd4	0.0152045	1.55223	0.276	0.102	1
Atp9a	0.0152239	1.19862	0.378	0.184	1
Ndufa6	0.0152614	0.474944	0.776	0.592	1
Sbno1	0.0153106	0.992075	0.388	0.184	1
Lrrc45	0.0153389	2.30612	0.194	0.041	1
Tubb3	0.0153938	3.97424	0.092	0	1
Ndp	0.0153943	2.57302	0.112	0	1
Rbmx2	0.0153943	2.68393	0.112	0	1
Dcp1a	0.0153943	3.17863	0.112	0	1
Tfeb	0.0153943	2.80589	0.112	0	1
Uty	0.0153943	2.64287	0.112	0	1
Pdgfrl	0.0154956	0.60102	0.622	0.388	1
Ercc1	0.0155681	1.15394	0.265	0.082	1
Ccar1	0.0156132	1.22725	0.449	0.265	1
Vwa5a	0.0156304	0.364298	0.367	0.163	1
Lrrfip1	0.0158113	1.26054	0.469	0.265	1
Brd3	0.0158113	0.855523	0.469	0.265	1
Atp1b3	0.0158774	0.827823	0.745	0.612	1
Dtd2	0.0159263	1.35381	0.316	0.143	1
Hsp90ab1	0.0161247	-0.223935	0.959	0.918	1
Nfkbia	0.0161553	0.996974	0.714	0.49	1
Ltbp2	0.0161921	1.2724	0.541	0.347	1
Pex16	0.016216	1.40042	0.194	0.041	1
Frmd4b	0.016216	1.66555	0.194	0.041	1
Odf2	0.0162646	2.12413	0.184	0.041	1
Vsig10	0.0162646	2.30743	0.184	0.041	1
Col26a1	0.0163131	0.98332	0.449	0.245	1
Cacnb2	0.0164865	2.25487	0.153	0.02	1
Tmem191c	0.0164865	1.82022	0.153	0.02	1
Gle1	0.0166878	1.21396	0.286	0.102	1
Mbd6	0.0166878	0.940246	0.286	0.102	1
H6pd	0.0166967	1.53259	0.276	0.102	1
Arid2	0.0167562	0.836167	0.388	0.163	1
Mta1	0.01713	1.58946	0.316	0.143	1
Ugp2	0.0171715	-0.735117	0.316	0.51	1
Ano6	0.0171715	1.10827	0.439	0.265	1
Csnk1a1	0.0172657	0.707039	0.755	0.551	1
Hmgn3	0.0173058	0.723366	0.684	0.49	1
Aldh2	0.0173087	0.632037	0.847	0.673	1
Cacna1g	0.0173219	-0.149502	0.51	0.306	1
H2-M3	0.017432	1.06956	0.337	0.143	1
Epb41l3	0.0174347	0.928544	0.255	0.082	1
Cebpd	0.0174593	1.04133	0.673	0.592	1
Ppan	0.0175948	-2.11395	0.061	0.184	1
Coq7	0.0177184	1.6882	0.296	0.122	1
Nudt3	0.0177219	0.830077	0.306	0.122	1
Col23a1	0.0177748	0.452764	0.551	0.347	1
Psd3	0.0177855	1.09153	0.224	0.061	1
Ang	0.0179057	1.60942	0.153	0.02	1
Flot1	0.0179921	0.714682	0.541	0.327	1
Uap1l1	0.0180024	1.82512	0.214	0.061	1
Naglu	0.0180368	1.71236	0.276	0.102	1
Pth1r	0.0180897	-2.02587	0.122	0.265	1
Nupr1	0.0181162	0.625944	0.888	0.837	1
Ino80	0.0181986	-1.71511	0.092	0.224	1
Atad1	0.0183112	1.45588	0.388	0.204	1
Wdr86	0.0184176	0.56531	0.5	0.245	1
Ciapin1	0.0184358	0.560538	0.194	0.041	1
Egflam	0.0184822	0.266025	0.316	0.122	1
Rbms1	0.0185341	0.501733	0.745	0.531	1
Pcnt	0.0185398	2.31178	0.184	0.041	1
Stx18	0.0185483	-1.27358	0.245	0.388	1
Ift80	0.0185849	1.53235	0.255	0.082	1
Ube2b	0.0186023	0.720692	0.745	0.612	1
Spry4	0.0186327	1.9341	0.214	0.061	1
Ddx19a	0.0187351	-0.861557	0.153	0.327	1
C1ra	0.0187812	0.421183	0.786	0.633	1
Mgst1	0.0191204	0.680563	0.663	0.469	1
Tap2	0.0191327	1.027	0.449	0.265	1
Mbd1	0.0191915	1.04437	0.245	0.082	1
2210016F16Rik	0.0191959	1.08635	0.357	0.163	1
Maff	0.0192822	2.01948	0.214	0.061	1
Slc25a36	0.0193506	1.22158	0.306	0.122	1
Filip1l	0.0194727	1.4515	0.265	0.102	1
Lars2	0.0195027	0.82738	0.582	0.347	1
Vps4a	0.0195159	0.98124	0.337	0.143	1
Wif1	0.0195653	-3.30924	0.082	0.204	1
mt-Co2	0.0197046	-0.104662	1	1	1
Man2b1	0.0197281	0.480293	0.357	0.163	1
Rngtt	0.0198154	1.95286	0.204	0.061	1
Pcp4	0.0198632	3.32341	0.347	0.184	1
Crabp1	0.0199001	0.559	0.561	0.327	1
Itpkb	0.0199253	0.872123	0.296	0.102	1
Pcm1	0.0199536	0.803716	0.592	0.367	1
Eefsec	0.0199597	2.21112	0.143	0.02	1
Homer2	0.0199597	2.76028	0.143	0.02	1
Gtf3c6	0.0200809	-1.48079	0.163	0.306	1
Srsf5	0.0201148	0.504351	0.755	0.612	1
Purb	0.0202414	1.40689	0.48	0.306	1
Bptf	0.0202821	0.971318	0.571	0.429	1
Gpatch1	0.0203869	2.43486	0.173	0.041	1
Crlf2	0.0203912	-1.31869	0.163	0.306	1
Rft1	0.0205132	2.0358	0.204	0.061	1
Ezh1	0.020524	1.50937	0.286	0.122	1
Smim19	0.0206416	0.811467	0.5	0.286	1
Ssbp4	0.0206474	-0.978045	0.449	0.571	1
Ran	0.0206555	-0.665655	0.673	0.714	1
Hyou1	0.0206909	-1.67648	0.112	0.245	1
Mmp19	0.0207069	1.77791	0.184	0.041	1
Pptc7	0.0207884	-1.53492	0.143	0.286	1
Eef2	0.0208085	0.43892	0.929	0.776	1
Ldah	0.020837	1.59252	0.296	0.122	1
Tspan13	0.0209179	0.881884	0.571	0.367	1
Stmn2	0.021082	2.89142	0.02	0	1
Gstm1	0.0211585	0.758327	0.745	0.51	1
Plekhn1	0.021243	2.24971	0.143	0.02	1
Apaf1	0.021243	2.15632	0.143	0.02	1
Elavl3	0.0213466	3.86342	0.071	0	1
Rnf25	0.0213492	3.36049	0.102	0	1
Cyp27a1	0.0213492	2.39916	0.102	0	1
Kcnj13	0.0213492	3.41583	0.102	0	1
Plekha6	0.0213492	2.86421	0.102	0	1
Cyp7b1	0.0213492	2.90069	0.102	0	1
Actr3b	0.0213492	2.59362	0.102	0	1
Zfand2a	0.0213492	2.54139	0.102	0	1
Lmtk2	0.0213492	2.82763	0.102	0	1
N4bp2l1	0.0213492	2.57619	0.102	0	1
Mansc4	0.0213492	3.02338	0.102	0	1
Susd2	0.0213492	3.95909	0.102	0	1
Cilp2	0.0213492	3.25812	0.102	0	1
Slco2a1	0.0213492	4.39755	0.102	0	1
Gm5141	0.0213492	2.84549	0.102	0	1
Them6	0.0213492	2.84648	0.102	0	1
Prr5	0.0213492	2.84392	0.102	0	1
Kdm5d	0.0213492	2.25765	0.102	0	1
Dhx30	0.0214029	1.16878	0.357	0.163	1
Tsc22d1	0.021467	0.492854	0.847	0.714	1
Matn2	0.0215272	0.714824	0.571	0.347	1
Plk2	0.0215479	1.81824	0.347	0.184	1
Hspe1	0.0216061	-0.629091	0.694	0.755	1
Pnp	0.021648	0.233778	0.612	0.388	1
Pibf1	0.0216865	-1.64049	0.061	0.184	1
Rgmb	0.0216945	0.673169	0.367	0.163	1
Fxyd6	0.0217749	0.957941	0.51	0.327	1
Cpeb4	0.0218011	1.36779	0.245	0.082	1
Dynlt3	0.0219514	0.940179	0.531	0.327	1
Kdelr2	0.0221216	-0.856651	0.765	0.816	1
Usp42	0.0221379	2.32501	0.143	0.02	1
B3galnt2	0.0221379	2.77005	0.143	0.02	1
Enah	0.0222989	0.516358	0.408	0.204	1
Apcdd1	0.0222989	-0.20321	0.408	0.204	1
Sae1	0.0224871	0.809162	0.378	0.184	1
1500011B03Rik	0.022587	1.25279	0.357	0.163	1
Bri3	0.0225892	0.644793	0.786	0.673	1
Ehd4	0.0226825	1.45981	0.265	0.102	1
Tmem86a	0.0226825	1.33397	0.265	0.102	1
Trp53bp2	0.0227365	2.06924	0.204	0.061	1
Wee1	0.0227365	1.90992	0.204	0.061	1
Bambi	0.0227389	-1.51502	0.245	0.388	1
Btbd2	0.0228351	1.59094	0.214	0.061	1
Frmd8	0.0228565	0.797282	0.245	0.082	1
Tgm2	0.0229258	1.13663	0.52	0.327	1
Serpinh1	0.0229349	-0.331823	0.949	0.959	1
Nav3	0.0229451	-2.42331	0.041	0.143	1
Faap100	0.0230655	-2.97825	0.061	0.184	1
Iffo2	0.0230655	1.90974	0.143	0.02	1
Mecr	0.0230915	1.15602	0.184	0.041	1
Pdrg1	0.0230998	-0.889972	0.48	0.633	1
Wls	0.0231572	0.531566	0.816	0.694	1
Slc39a13	0.0231816	-1.28229	0.235	0.388	1
Morc2a	0.0232199	1.30424	0.214	0.061	1
Immp1l	0.0232801	0.730281	0.429	0.224	1
P4ha2	0.0232896	-1.43653	0.224	0.388	1
Serinc3	0.0233692	0.517945	0.806	0.612	1
Rnf19b	0.0235418	1.72379	0.143	0.02	1
Tm4sf1	0.0235516	0.442221	0.806	0.653	1
Rpl35a	0.0235619	-0.234297	0.969	0.939	1
St6galnac6	0.0235846	0.855372	0.245	0.082	1
Rpp40	0.0235893	-2.53583	0.01	0.082	1
Ppp3cb	0.0237527	-1.24474	0.204	0.367	1
Rpl32	0.0238092	-0.316767	0.969	0.898	1
Hic1	0.0239378	-0.249718	0.184	0.041	1
Casp6	0.0240064	0.898369	0.214	0.061	1
Miga1	0.0240266	1.72337	0.143	0.02	1
Mpv17l2	0.0240899	0.484994	0.265	0.102	1
Ier5	0.0240921	1.20276	0.337	0.163	1
Rheb	0.0242312	0.513831	0.806	0.694	1
Ets1	0.0242731	-1.75827	0.051	0.163	1
Sfpq	0.0243244	0.529914	0.694	0.49	1
Mettl21a	0.0243325	2.35105	0.204	0.061	1
Il12a	0.0244066	-3.47359	0.01	0.082	1
Unc5c	0.0244066	-2.51925	0.01	0.082	1
Gtf2ird2	0.0244066	-2.66037	0.01	0.082	1
Cntnap1	0.0244066	-2.59019	0.01	0.082	1
Col11a2	0.0244066	-3.00225	0.01	0.082	1
Rab23	0.0245341	1.61873	0.173	0.041	1
Mfsd1	0.0247624	1.11634	0.316	0.143	1
Ugdh	0.0247624	-0.850755	0.204	0.367	1
Tubb6	0.0247719	1.19431	0.357	0.184	1
Ahnak	0.0247815	0.301994	0.898	0.776	1
Pim1	0.0248036	-0.956034	0.173	0.327	1
Slc25a51	0.0249584	1.23483	0.367	0.204	1
Akip1	0.0250222	1.53468	0.143	0.02	1
Sh3yl1	0.0250222	1.14181	0.143	0.02	1
Dusp18	0.0252003	-2.08436	0.041	0.143	1
Spon2	0.0252483	-2.90297	0.01	0.082	1
Adat1	0.0252483	-3.26189	0.01	0.082	1
Gmppa	0.0253095	-0.93499	0.184	0.347	1
Slc26a11	0.0253458	-1.99445	0.051	0.163	1
Aopep	0.0253638	0.655933	0.541	0.347	1
Mettl7a1	0.025421	1.06547	0.551	0.367	1
Rundc1	0.025424	-2.67528	0.031	0.122	1
Mfap1b	0.0254246	0.981291	0.327	0.143	1
Gstt2	0.0254461	1.83209	0.173	0.041	1
Thy1	0.025543	0.896858	0.531	0.327	1
Nme3	0.0255696	-2.7145	0.02	0.102	1
Iigp1	0.0257432	1.08222	0.653	0.551	1
Tbrg1	0.0257626	-0.805031	0.633	0.735	1
Itpripl2	0.0257693	1.13861	0.337	0.163	1
Ccdc152	0.0257932	-1.70156	0.041	0.143	1
Kremen1	0.0258091	1.71357	0.316	0.143	1
Rpl19	0.0259364	-0.239475	0.969	0.98	1
Cog5	0.0259415	1.34236	0.235	0.082	1
Elmsan1	0.0260247	1.76168	0.204	0.061	1
Aldh3a2	0.0260767	-1.78532	0.102	0.224	1
Shc2	0.0260806	-3.16594	0.031	0.122	1
C1qb	0.0261136	-2.27653	0.01	0.041	1
Rpp38	0.026115	-2.3782	0.01	0.082	1
Scfd2	0.026115	-2.17433	0.01	0.082	1
Adamts3	0.026115	-2.17959	0.01	0.082	1
Aif1	0.026115	-2.43716	0.01	0.082	1
Kctd17	0.0261166	1.50591	0.337	0.163	1
Psma5	0.026285	0.756131	0.704	0.571	1
Fam149b	0.0262933	0.904098	0.245	0.082	1
Rps6	0.0263025	-0.523139	0.888	0.816	1
Ch25h	0.0263382	-1.84055	0.133	0.265	1
Hspb8	0.0263867	1.56465	0.255	0.102	1
Sult1a1	0.0266567	1.06346	0.286	0.122	1
Samd14	0.0267353	-1.4481	0.163	0.306	1
mt-Nd4	0.0269142	-0.307614	1	1	1
Epha7	0.0270763	-2.43743	0.02	0.102	1
Cpxm1	0.0271194	0.641973	0.827	0.694	1
Ccdc12	0.027272	-0.920887	0.388	0.531	1
Zfp1	0.0273597	1.36745	0.204	0.061	1
Fhl2	0.0275296	1.26343	0.429	0.245	1
Cavin1	0.0275971	0.360293	0.684	0.429	1
Plxdc1	0.0276126	1.28035	0.235	0.082	1
Xndc1	0.0276449	-1.61368	0.041	0.143	1
Klhl5	0.0278195	1.26213	0.286	0.122	1
Slc1a2	0.0279046	2.26517	0.133	0.02	1
Hfe	0.0279104	0.840998	0.357	0.163	1
Slbp	0.0279437	1.2082	0.265	0.102	1
Rbm27	0.028148	1.29509	0.316	0.163	1
Slc35b1	0.0281976	-0.818066	0.357	0.51	1
Prcp	0.0282165	-0.950236	0.122	0.265	1
Arih2	0.0282822	1.5909	0.204	0.061	1
Camta2	0.0282822	1.47835	0.204	0.061	1
Limk2	0.0282871	-1.7808	0.041	0.143	1
Matn4	0.0283382	0.551652	0.327	0.143	1
Irs2	0.0284196	1.24801	0.398	0.245	1
Ckap5	0.0284235	1.36614	0.306	0.143	1
Stx17	0.028517	-1.16589	0.112	0.245	1
Irx5	0.028659	-2.33409	0.02	0.102	1
Sp7	0.028659	-3.03486	0.02	0.102	1
Srek1	0.0287648	1.11325	0.388	0.204	1
Col4a5	0.0288958	-0.277725	0.439	0.224	1
Ubqln2	0.0289537	1.51146	0.224	0.082	1
Gfra1	0.0289916	-1.90125	0.112	0.245	1
Smarcad1	0.0290334	1.89004	0.163	0.041	1
Lmo7	0.029048	1.31701	0.367	0.184	1
Dnaja2	0.0290492	0.6096	0.684	0.469	1
Cln3	0.0290735	2.19298	0.133	0.02	1
Rpl8	0.0290887	-0.360294	0.949	0.898	1
Trp53inp1	0.0293411	0.63596	0.296	0.122	1
Tnrc6a	0.0294372	-0.758246	0.439	0.592	1
Col13a1	0.0294396	-1.77574	0.071	0.184	1
Epyc	0.0294799	-2.52409	0.02	0.102	1
Fetub	0.0294856	1.57562	0.398	0.265	1
Egr2	0.029569	2.51084	0.163	0.041	1
Lrsam1	0.0295878	2.00538	0.092	0	1
Chgb	0.0295878	1.95869	0.092	0	1
Lama5	0.0295878	2.81542	0.092	0	1
Cd1d1	0.0295878	2.79352	0.092	0	1
Fbxo46	0.0295878	3.0845	0.092	0	1
Ccdc138	0.0295878	2.56701	0.092	0	1
Inpp4b	0.0295878	2.71943	0.092	0	1
Atp8a2	0.0295878	2.64216	0.092	0	1
Dmtn	0.0295878	1.76827	0.092	0	1
Lacc1	0.0295878	2.58831	0.092	0	1
AW209491	0.0295878	2.25174	0.092	0	1
Slc35d2	0.0295878	2.56781	0.092	0	1
BC067074	0.0295878	2.56797	0.092	0	1
Dtnb	0.0295878	2.29963	0.092	0	1
Six4	0.0295878	2.75678	0.092	0	1
Nrtn	0.0295878	5.34884	0.092	0	1
Nedd4l	0.0295878	2.76993	0.092	0	1
Chsy3	0.0295878	-1.96304	0.031	0.122	1
Foxg1	0.0295878	2.79108	0.082	0	1
Ly6h	0.0295878	1.96312	0.082	0	1
Arsi	0.0296101	-1.75164	0.041	0.143	1
Traf5	0.0296736	2.61806	0.133	0.02	1
Aven	0.0296736	2.12275	0.133	0.02	1
Ccar2	0.0296736	1.88618	0.133	0.02	1
Cyb5a	0.0297544	0.411426	0.918	0.816	1
Dennd4a	0.0299221	1.25727	0.173	0.041	1
Cdkn1c	0.0299349	0.569502	0.592	0.429	1
Cdk2ap1	0.0299584	-1.01316	0.327	0.449	1
Col5a3	0.0299749	-1.85311	0.153	0.286	1
Rassf9	0.0300107	-2.19633	0.071	0.184	1
Hcfc2	0.0302843	2.13409	0.133	0.02	1
Acad11	0.0302843	1.89952	0.133	0.02	1
Col5a1	0.0303623	-0.444244	0.816	0.837	1
Cbx1	0.0304177	0.956977	0.602	0.469	1
Apobec3	0.0306035	0.883728	0.347	0.163	1
Dynlrb1	0.0306112	0.507917	0.765	0.612	1
Tmem50a	0.0306136	0.407174	0.898	0.796	1
Slit2	0.0306402	-0.704715	0.357	0.551	1
Map6	0.0306658	1.70437	0.163	0.041	1
Nkd2	0.0308084	0.877404	0.48	0.286	1
Ddr2	0.0308597	0.924431	0.663	0.49	1
Zfp251	0.0309058	1.9899	0.133	0.02	1
Tjp1	0.0310504	0.557806	0.582	0.367	1
Slc43a3	0.0311364	1.11526	0.286	0.122	1
Zfp458	0.0311823	-1.7516	0.02	0.102	1
Tbc1d24	0.0311823	-1.99163	0.02	0.102	1
Eml1	0.0312122	1.14999	0.204	0.061	1
Dusp1	0.0314403	0.803025	0.714	0.633	1
Dag1	0.031451	0.331356	0.653	0.449	1
Msrb3	0.0314537	0.957747	0.459	0.286	1
Creg1	0.0314678	0.902273	0.541	0.388	1
Ccdc90b	0.0315739	-1.01646	0.184	0.327	1
Msrb1	0.031637	0.394262	0.469	0.265	1
Ttll7	0.0317973	2.09814	0.163	0.041	1
Lmod1	0.0318212	1.04813	0.459	0.286	1
Tox4	0.0319841	1.21046	0.255	0.102	1
Pank2	0.0320168	1.1041	0.286	0.122	1
Dgcr6	0.0320798	1.1108	0.48	0.306	1
Tpgs1	0.0321114	0.857563	0.388	0.224	1
Gna12	0.0321233	1.07712	0.306	0.143	1
Idh3g	0.0323754	0.974205	0.347	0.184	1
Brd4	0.0327563	0.943466	0.469	0.265	1
Arel1	0.0327725	0.934293	0.204	0.061	1
Rpl22l1	0.0328797	-0.359061	0.908	0.898	1
Coprs	0.0329644	1.84985	0.163	0.041	1
Pear1	0.0330957	1.45623	0.337	0.163	1
Rpl21	0.0331146	-0.331766	0.959	0.939	1
Rpe	0.0333072	0.762316	0.204	0.061	1
Pcgf5	0.0333773	1.38351	0.286	0.122	1
Emx2	0.0335024	0.928762	0.133	0.02	1
Guk1	0.0335771	0.791022	0.48	0.306	1
Zfp871	0.0337387	0.891507	0.357	0.184	1
Serhl	0.03381	1.30805	0.224	0.082	1
Foxp4	0.03381	1.52007	0.224	0.082	1
Naaladl2	0.0338306	1.65482	0.194	0.061	1
Cpeb1	0.0338493	0.93976	0.204	0.061	1
Stx12	0.0338966	0.796448	0.408	0.224	1
Fermt2	0.0340499	0.628642	0.806	0.653	1
Eif5a2	0.03418	0.54735	0.133	0.02	1
Paqr7	0.03418	0.579858	0.133	0.02	1
Mxd1	0.0342126	0.941488	0.235	0.082	1
Hgsnat	0.0343619	1.06751	0.429	0.224	1
Frmpd4	0.0343905	1.7651	0.194	0.061	1
Pfn1	0.0344077	-0.340966	0.908	0.878	1
Eid1	0.0345302	0.608392	0.847	0.776	1
Bmp4	0.0345536	0.395089	0.551	0.347	1
Trnp1	0.0348015	2.10679	0.316	0.163	1
Tusc3	0.0349725	0.412254	0.633	0.49	1
Mgp	0.0351481	0.345253	0.929	0.878	1
Ccdc28b	0.0351807	1.23955	0.316	0.143	1
Ecm2	0.0352794	-1.78534	0.204	0.347	1
Omp	0.0353634	3.23935	0.143	0.082	1
Igfbp7	0.0353714	0.346391	0.918	0.776	1
Acbd4	0.0353943	1.21179	0.276	0.122	1
Pbx3	0.0354615	1.74605	0.265	0.122	1
Pdlim7	0.0355008	0.93229	0.531	0.367	1
Tmed5	0.0355239	1.26664	0.327	0.184	1
Sspn	0.0355587	0.346679	0.531	0.306	1
Fgfrl1	0.0357046	0.765592	0.408	0.204	1
Ldhb	0.0357765	0.737161	0.684	0.531	1
Sept4	0.0359118	1.94873	0.255	0.102	1
Rps4x	0.0359277	-0.414203	0.969	0.959	1
Eln	0.0361013	-1.11508	0.612	0.653	1
4930453N24Rik	0.0361545	0.728572	0.347	0.163	1
H2-K1	0.0362033	0.647007	0.888	0.714	1
Pak1	0.036265	-1.22303	0.071	0.184	1
Nme1	0.0362728	-1.14903	0.49	0.612	1
Clmn	0.0366108	2.59765	0.122	0.02	1
Psmd13	0.0368887	0.601512	0.551	0.347	1
Rbm34	0.0369476	-1.49095	0.071	0.184	1
Evc2	0.0370457	0.973141	0.224	0.082	1
Rps15	0.0371705	-0.416113	0.929	0.898	1
Rab5a	0.0371839	0.722962	0.52	0.286	1
S100z	0.0371878	0.467108	0.061	0.02	1
Taok3	0.0372496	0.822705	0.286	0.122	1
Tent2	0.0372496	1.09989	0.286	0.122	1
Jak1	0.0372895	0.451001	0.765	0.551	1
Spint2	0.0373425	1.62511	0.153	0.041	1
Glipr1	0.0373667	2.44648	0.122	0.02	1
Retreg1	0.0374048	1.5237	0.276	0.122	1
Rab2b	0.0376398	1.43796	0.245	0.102	1
Gjc1	0.0376926	1.38427	0.306	0.143	1
Tuba1c	0.0377927	0.160986	0.663	0.449	1
Cebpzos	0.0378755	-1.27684	0.224	0.347	1
Gnai2	0.0378942	0.320402	0.929	0.857	1
Insig1	0.0380067	1.13301	0.163	0.041	1
Ahcyl1	0.0380834	0.688356	0.531	0.347	1
Pgm5	0.0381359	3.66784	0.122	0.02	1
Itm2b	0.0381676	0.205247	0.99	1	1
Reep4	0.0382807	1.37472	0.214	0.082	1
Reck	0.0383125	0.736059	0.439	0.245	1
Lpl	0.0384498	-0.210042	0.643	0.388	1
Tsr2	0.0384756	-1.28026	0.102	0.224	1
Lsg1	0.0385353	1.28959	0.194	0.061	1
Kif5b	0.0386605	0.279429	0.806	0.592	1
Sil1	0.038741	1.25242	0.245	0.102	1
Pex19	0.03886	0.354591	0.418	0.204	1
Timm22	0.0388655	0.435641	0.357	0.163	1
Tmem30b	0.0389185	2.45687	0.122	0.02	1
Rusc1	0.0389702	1.81595	0.153	0.041	1
L3mbtl3	0.0389758	1.27724	0.276	0.122	1
9530068E07Rik	0.0390979	0.738743	0.694	0.571	1
Ppm1b	0.0391205	0.876673	0.327	0.163	1
Tagln2	0.0391263	-0.586816	0.439	0.592	1
Yy1	0.0391701	0.321166	0.5	0.306	1
Sec23ip	0.0393017	1.27339	0.245	0.102	1
Sap18	0.0393068	0.339777	0.673	0.51	1
Atp2a2	0.0393248	0.656323	0.786	0.673	1
Fbxo30	0.0394675	1.54078	0.214	0.082	1
Pkm	0.0394983	0.516537	0.786	0.612	1
Lztfl1	0.0395118	1.21864	0.276	0.122	1
Fam13c	0.0396764	2.59126	0.153	0.041	1
Fem1a	0.0397147	2.98554	0.122	0.02	1
Fbxw7	0.0397948	0.623582	0.194	0.061	1
Mta3	0.0397948	1.5038	0.194	0.061	1
Fryl	0.0398719	1.2124	0.286	0.143	1
Rtf2	0.0400105	1.14563	0.408	0.265	1
Cped1	0.040152	0.661323	0.714	0.551	1
3110009E18Rik	0.0403935	2.22367	0.153	0.041	1
Negr1	0.0404139	1.79393	0.184	0.061	1
Iqsec1	0.0404651	0.690233	0.449	0.245	1
Dstn	0.0406685	0.546201	0.949	0.857	1
Rnaseh2b	0.0406853	1.46153	0.214	0.082	1
Alad	0.0407646	0.731036	0.163	0.041	1
Mapre1	0.0408832	0.558242	0.633	0.49	1
Atrn	0.0409004	0.359943	0.235	0.082	1
Clp1	0.0410067	2.92823	0.082	0	1
Zfp770	0.0410067	2.13631	0.082	0	1
Fndc10	0.0410067	2.44089	0.082	0	1
Ppp2r2c	0.0410067	1.63202	0.082	0	1
Cttnbp2	0.0410067	2.86837	0.082	0	1
Trim66	0.0410067	2.03339	0.082	0	1
Lca5	0.0410067	2.55476	0.082	0	1
Mlh1	0.0410067	2.3265	0.082	0	1
Trarg1	0.0410067	2.73476	0.082	0	1
Cdc14b	0.0410067	2.43879	0.082	0	1
Eppk1	0.0410067	2.45803	0.082	0	1
Carns1	0.0410067	2.77255	0.082	0	1
Slc25a33	0.041089	1.25178	0.194	0.061	1
Igtp	0.041089	1.11881	0.194	0.061	1
Rpl39	0.0411218	-0.268693	0.969	0.939	1
Casp8ap2	0.0411506	0.879042	0.224	0.082	1
Traf7	0.0411507	0.832605	0.357	0.184	1
Rpl36al	0.0412587	-0.68101	0.653	0.735	1
Hacd4	0.0412965	1.01901	0.52	0.367	1
Tnks	0.0413061	1.64691	0.214	0.082	1
Shfl	0.0413061	1.42348	0.214	0.082	1
Ptcd2	0.0413061	1.18235	0.214	0.082	1
Lrrc49	0.04148	1.06202	0.163	0.041	1
Cthrc1	0.04148	-0.181412	0.163	0.041	1
Dusp12	0.0416313	-1.78355	0.092	0.204	1
Ddx46	0.0416751	-1.10792	0.163	0.306	1
Aox3	0.0417875	1.07585	0.612	0.49	1
Frem2	0.0419906	0.810411	0.48	0.306	1
Iscu	0.0420632	0.459064	0.755	0.612	1
Msmo1	0.0424213	-2.10079	0.051	0.143	1
Chrm3	0.0424213	-2.56546	0.051	0.143	1
Rpl3	0.0425325	-0.201473	0.939	0.898	1
Nav2	0.0425418	0.890293	0.347	0.163	1
Ptges2	0.0426109	1.76239	0.153	0.041	1
Adam22	0.0426109	1.94369	0.153	0.041	1
Prxl2b	0.0426659	1.88612	0.398	0.224	1
Trp53i11	0.0427423	0.369008	0.327	0.163	1
Med4	0.042813	0.695849	0.245	0.102	1
Tnik	0.0429749	1.60934	0.235	0.102	1
Tapt1	0.0430392	1.94602	0.122	0.02	1
Kptn	0.0430392	1.80438	0.122	0.02	1
Ppp2r5a	0.0430719	0.216896	0.398	0.204	1
1190007I07Rik	0.0430972	0.837042	0.194	0.061	1
Bicral	0.0433726	1.82189	0.153	0.041	1
Cdkn1b	0.0435412	0.794979	0.429	0.245	1
1810013L24Rik	0.0437715	0.702463	0.286	0.122	1
Hspa1b	0.0438277	1.24634	0.327	0.163	1
Tmem175	0.0438284	1.82944	0.184	0.061	1
Dis3l2	0.0439062	1.40199	0.122	0.02	1
C1qtnf4	0.0440116	1.0769	0.327	0.184	1
Ppib	0.0440486	-0.367522	0.949	0.939	1
Magt1	0.0442654	-0.911413	0.245	0.408	1
Rps20	0.0442706	-0.271332	0.959	0.939	1
Cx3cl1	0.0442906	0.836627	0.439	0.265	1
Dohh	0.0443196	1.25134	0.286	0.143	1
Map1a	0.0445397	1.67121	0.184	0.061	1
Mt1	0.0446469	2.16173	0.449	0.327	1
Plaa	0.0447878	1.49099	0.122	0.02	1
Marveld1	0.0447896	-0.178613	0.439	0.265	1
Zhx3	0.0447975	1.12834	0.296	0.143	1
Dpysl3	0.0449063	0.709067	0.612	0.469	1
Ndel1	0.0450417	0.658448	0.388	0.204	1
Fcgrt	0.04518	0.235803	0.908	0.816	1
Eif3h	0.0453684	0.390651	0.847	0.612	1
Arpc4	0.0453837	0.690328	0.551	0.367	1
Actr2	0.0454499	-1.17611	0.439	0.551	1
Snrpc	0.0456385	0.75767	0.48	0.286	1
Nid2	0.0456602	0.128465	0.398	0.204	1
Rmdn3	0.0456843	0.945584	0.122	0.02	1
Bloc1s3	0.0456843	1.24293	0.122	0.02	1
St6galnac2	0.0456843	1.11083	0.122	0.02	1
Mfsd8	0.045727	1.93089	0.153	0.041	1
Mtor	0.045727	1.59994	0.153	0.041	1
Rnf168	0.0458342	-1.60721	0.061	0.163	1
Col4a3	0.0458688	-2.82734	0	0.041	1
Lypd1	0.0458688	-2.81633	0	0.041	1
Ildr2	0.0458688	-3.59217	0	0.041	1
Igsf9	0.0458688	-2.72411	0	0.041	1
Itgb6	0.0458688	-2.71535	0	0.041	1
Slc4a10	0.0458688	-3.58444	0	0.041	1
Zfp341	0.0458688	-2.55907	0	0.041	1
Usp27x	0.0458688	-3.55962	0	0.041	1
Tmem28	0.0458688	-2.66662	0	0.041	1
Gdpd2	0.0458688	-2.72793	0	0.041	1
Il2rg	0.0458688	-2.71483	0	0.041	1
Dmrtc1a	0.0458688	-2.72996	0	0.041	1
Nrk	0.0458688	-3.38326	0	0.041	1
Sema4a	0.0458688	-2.45186	0	0.041	1
Wdr78	0.0458688	-2.44332	0	0.041	1
Ipp	0.0458688	-2.64816	0	0.041	1
Slc2a9	0.0458688	-2.20169	0	0.041	1
Vmn2r17	0.0458688	-1.48676	0	0.041	1
Mphosph9	0.0458688	-2.36832	0	0.041	1
Lfng	0.0458688	-2.99872	0	0.041	1
Tmem229a	0.0458688	-2.51535	0	0.041	1
E330009J07Rik	0.0458688	-3.02971	0	0.041	1
Vmn1r9	0.0458688	-2.03188	0	0.041	1
M1ap	0.0458688	-2.21335	0	0.041	1
Abcc9	0.0458688	-2.62246	0	0.041	1
Il11	0.0458688	-2.85618	0	0.041	1
Vmn2r53	0.0458688	-2.77588	0	0.041	1
Zscan18	0.0458688	-2.85663	0	0.041	1
Ctu1	0.0458688	-5.43314	0	0.041	1
Iqck	0.0458688	-2.60507	0	0.041	1
Trappc3l	0.0458688	-2.54615	0	0.041	1
Arhgap45	0.0458688	-3.06895	0	0.041	1
Slc26a10	0.0458688	-2.67745	0	0.041	1
Arhgap9	0.0458688	-2.96804	0	0.041	1
Myo16	0.0458688	-2.65496	0	0.041	1
Gm10282	0.0458688	-3.00721	0	0.041	1
Cdt1	0.0458688	-2.38591	0	0.041	1
Tmem254a	0.0458688	-2.36869	0	0.041	1
Ephx2	0.0458688	-2.86218	0	0.041	1
Hemk1	0.0458688	-2.80811	0	0.041	1
Entpd3	0.0458688	-2.93445	0	0.041	1
Fem1al	0.0458688	-2.75843	0	0.041	1
Gdf9	0.0458688	-2.68613	0	0.041	1
Rnasek	0.0458688	-2.382	0	0.041	1
Pitpnm3	0.0458688	-2.69289	0	0.041	1
Brip1	0.0458688	-2.57026	0	0.041	1
Klhl11	0.0458688	-2.17938	0	0.041	1
Dnaic2	0.0458688	-3.21842	0	0.041	1
Tepsin	0.0458688	-2.34153	0	0.041	1
Fam228b	0.0458688	-2.59912	0	0.041	1
Greb1	0.0458688	-3.42855	0	0.041	1
Rhpn1	0.0458688	-3.10581	0	0.041	1
Pdxp	0.0458688	-2.80349	0	0.041	1
Zbed4	0.0458688	-2.03241	0	0.041	1
Col2a1	0.0458688	-3.70155	0	0.041	1
Krt79	0.0458688	-2.54383	0	0.041	1
Espl1	0.0458688	-2.48311	0	0.041	1
Eaf2	0.0458688	-2.72881	0	0.041	1
Dnajc28	0.0458688	-3.01981	0	0.041	1
Rps6ka2	0.0458688	-2.82625	0	0.041	1
Zfp472	0.0458688	-2.60058	0	0.041	1
Mpeg1	0.0458688	-3.03519	0	0.041	1
Lpxn	0.0458688	-2.33838	0	0.041	1
Ina	0.0458688	-1.8366	0	0.041	1
Plekhs1	0.0458688	-3.30742	0	0.041	1
Aida	0.0459214	0.387566	0.459	0.265	1
Col18a1	0.0461851	0.265551	0.776	0.592	1
Rsrc2	0.0463275	0.492104	0.571	0.388	1
Prelp	0.046343	0.906086	0.541	0.388	1
Lgr5	0.0464291	1.08996	0.347	0.184	1
Ppp3r1	0.0464291	-0.922126	0.245	0.388	1
Cpne7	0.0465353	1.57625	0.153	0.041	1
Mpp5	0.0465353	1.56387	0.153	0.041	1
Got1	0.0465669	1.0568	0.214	0.082	1
Rfc2	0.0465669	-1.93722	0.133	0.245	1
Clip1	0.0465963	1.25752	0.418	0.265	1
Cfh	0.0466436	-0.875565	0.224	0.367	1
Irf2bp1	0.0469125	-1.02911	0.153	0.286	1
Egln2	0.0469935	0.769097	0.347	0.184	1
Smim10l1	0.0469995	0.37283	0.622	0.408	1
E130114P18Rik	0.047023	-1.95879	0.051	0.143	1
Rbbp7	0.0471467	0.444489	0.663	0.49	1
Ntn4	0.0472247	0.67106	0.327	0.163	1
Pygo1	0.0472411	0.742832	0.245	0.102	1
Sav1	0.0472876	0.746417	0.408	0.245	1
Rbm8a	0.0473194	0.598743	0.541	0.388	1
Etv5	0.0473556	1.63721	0.153	0.041	1
Arhgef7	0.0474777	1.10014	0.255	0.122	1
Mtif2	0.0474832	1.46781	0.184	0.061	1
Tmem259	0.0474884	0.534868	0.429	0.224	1
Csnk2a2	0.0475491	0.995906	0.388	0.224	1
Mrpl52	0.0476938	-0.540728	0.704	0.776	1
Gsta4	0.047694	0.644448	0.582	0.469	1
0610012G03Rik	0.047694	-0.63209	0.51	0.612	1
Prkag1	0.0478118	0.666798	0.327	0.163	1
Ifit3b	0.0478266	0.848817	0.408	0.245	1
Abcf1	0.0478484	-0.787723	0.378	0.51	1
Cbx6	0.0478591	0.738103	0.653	0.51	1
Wdfy3	0.0481572	1.45534	0.235	0.102	1
Ppt1	0.0482565	0.557044	0.459	0.286	1
Rnf20	0.0483179	-1.87495	0.143	0.265	1
Ifi27	0.0483704	0.503147	0.867	0.796	1
Uimc1	0.0483765	0.684363	0.224	0.082	1
Hspb1	0.0484959	1.37789	0.459	0.306	1
Gpr108	0.048548	1.21622	0.286	0.143	1
Plekhf1	0.0485749	0.913806	0.245	0.102	1
Dyrk1a	0.04868	1.50696	0.214	0.082	1
Prcc	0.0490328	1.47998	0.153	0.041	1
Khnyn	0.0490328	1.33443	0.153	0.041	1
Ifngr1	0.0490664	0.503449	0.643	0.531	1
Pkn1	0.0494021	0.700918	0.214	0.082	1
Fam3a	0.0494456	2.42503	0.255	0.122	1
Fbxw9	0.0494555	-1.13526	0.061	0.163	1
Cdc42ep3	0.0494949	0.251094	0.653	0.469	1
Cacna1d	0.0495874	0.778132	0.459	0.265	1
Taz	0.0499401	1.71065	0.245	0.102	1
Exoc8	0.0499805	-1.43924	0.051	0.143	1
Cyb561a3	0.0499805	-1.84174	0.051	0.143	1
Efemp1	0.0499903	0.178764	0.653	0.469	1
Tbc1d15	0.0500086	1.0433	0.378	0.224	1
Nedd9	0.0500848	1.0263	0.398	0.245	1
Rnf130	0.0502396	0.587023	0.663	0.449	1
Rbm33	0.0503543	1.67723	0.204	0.082	1
Lamc1	0.0504692	0.20021	0.816	0.633	1
Prxl2a	0.0505027	0.853927	0.347	0.184	1
Med30	0.0505982	0.892528	0.439	0.265	1
Casp4	0.0506132	1.98661	0.173	0.061	1
Mbd2	0.0507071	0.628846	0.612	0.449	1
Tars2	0.0507688	-2.44669	0.041	0.122	1
Ttc4	0.0507952	-2.16521	0.173	0.286	1
Selenop	0.0507993	0.413236	0.837	0.735	1
Sept8	0.0508403	0.643504	0.327	0.163	1
Aspa	0.0508731	1.54819	0.214	0.082	1
Apbb2	0.0509062	0.773175	0.49	0.306	1
Klf3	0.0509487	0.818406	0.418	0.265	1
Dctn1	0.0510695	1.0991	0.429	0.265	1
Lsm5	0.0511772	-0.767775	0.378	0.531	1
Arhgap17	0.0512506	1.13738	0.265	0.122	1
Ctsl	0.051348	0.16496	0.929	0.857	1
Fzd2	0.0515785	0.488247	0.643	0.469	1
Nub1	0.0515824	1.09282	0.316	0.163	1
Cabin1	0.0515824	1.08663	0.316	0.163	1
Sptbn1	0.0515839	0.362091	0.867	0.633	1
Plcl1	0.0516223	1.47644	0.214	0.082	1
Iqsec2	0.0516418	1.37112	0.153	0.041	1
Serpine2	0.0516873	-2.676	0.541	0.633	1
Anxa11	0.0517382	1.37538	0.449	0.327	1
Plxnb2	0.0517458	1.09786	0.408	0.245	1
Ttc21b	0.0520375	-2.72987	0.051	0.143	1
Cep95	0.0520375	-1.0485	0.051	0.143	1
Golga4	0.052096	0.261283	0.327	0.163	1
Lclat1	0.0522041	1.31866	0.184	0.061	1
Zkscan3	0.0522204	1.24999	0.316	0.163	1
Polr2g	0.0522672	0.715575	0.551	0.347	1
Erlin2	0.0522873	1.02588	0.306	0.163	1
Ndst1	0.0523946	0.298117	0.49	0.327	1
Birc6	0.0523946	-0.820287	0.388	0.531	1
P3h4	0.0524219	-1.02348	0.296	0.429	1
Upf3b	0.0524372	1.18255	0.286	0.143	1
Cep290	0.0525369	1.01414	0.153	0.041	1
Cpsf1	0.0525369	1.17772	0.153	0.041	1
Sirpa	0.0525623	-1.69354	0.092	0.204	1
Mak16	0.052783	-2.4622	0.112	0.224	1
Celf1	0.0529053	0.497397	0.469	0.265	1
Mrpl44	0.0530278	1.42148	0.184	0.061	1
Aspscr1	0.0530486	0.47347	0.255	0.102	1
Hspa4l	0.0530924	2.426	0.112	0.02	1
Insc	0.0530924	-1.8709	0.051	0.143	1
Hnrnpab	0.0532329	-0.540623	0.622	0.714	1
Zmym5	0.0532495	0.817215	0.418	0.265	1
Mrps10	0.0533636	-1.03079	0.143	0.265	1
Tgfbrap1	0.0536765	0.707834	0.276	0.122	1
Snx1	0.0537902	1.04528	0.286	0.143	1
Cxcl14	0.0538547	1.38107	0.235	0.102	1
Cspg4	0.0538614	-0.55944	0.153	0.286	1
Atg10	0.0539591	1.6653	0.173	0.061	1
Cox5a	0.0541261	-0.793846	0.755	0.776	1
Ankrd63	0.054165	2.33021	0.112	0.02	1
B3galt6	0.054165	-1.71889	0.051	0.143	1
Adck2	0.054165	-0.106521	0.051	0.143	1
Hspb6	0.054165	2.40736	0.112	0.02	1
Frg1	0.0542231	0.796393	0.398	0.224	1
Pias2	0.0542271	1.16811	0.204	0.082	1
Vps37a	0.0542303	0.995296	0.245	0.102	1
Hmces	0.054366	1.16908	0.153	0.041	1
Bcl7c	0.0545154	0.564186	0.673	0.531	1
Glmp	0.054546	0.931631	0.531	0.347	1
Cnot6	0.0545869	0.822591	0.418	0.245	1
Rnf115	0.0546851	0.524384	0.327	0.163	1
Fam3c	0.0548284	-0.997665	0.418	0.531	1
Crkl	0.0548315	-0.446162	0.082	0.184	1
Cited2	0.0548525	0.414934	0.612	0.49	1
Plppr3	0.0549677	2.03662	0.143	0.041	1
Flcn	0.0549677	1.82747	0.143	0.041	1
Hat1	0.0549743	0.798559	0.245	0.102	1
Thoc1	0.0549743	-1.67114	0.163	0.265	1
Cd164	0.0550727	-0.601349	0.571	0.653	1
Ptgs2	0.0552556	2.00533	0.112	0.02	1
Mab21l1	0.0552556	1.88339	0.112	0.02	1
Tvp23a	0.0552556	2.18509	0.112	0.02	1
Eif2ak3	0.0553003	0.936674	0.153	0.041	1
Cinp	0.0553455	-0.114136	0.286	0.122	1
Fam43a	0.0553489	1.44955	0.316	0.184	1
Rnase4	0.055359	0.552898	0.765	0.571	1
Ahi1	0.0553638	1.2122	0.235	0.102	1
Cpsf3	0.0553638	1.32487	0.235	0.102	1
Sh3bgrl	0.0553897	0.535275	0.724	0.633	1
Atat1	0.0553941	-2.29728	0.041	0.122	1
Ago3	0.055508	1.65981	0.214	0.082	1
Wdsub1	0.0555098	0.827169	0.316	0.163	1
Esr1	0.0555645	0.900028	0.184	0.061	1
Slc50a1	0.0555848	-0.73838	0.602	0.673	1
Vamp4	0.0556118	0.875371	0.306	0.163	1
Pdcd6ip	0.0557404	-0.379688	0.327	0.469	1
Tlr2	0.0558444	-1.87567	0.122	0.245	1
Acvrl1	0.0559364	2.16636	0.143	0.041	1
Sfrp4	0.0561064	-0.703912	0.153	0.286	1
Gm2000	0.056108	-1.06235	0.327	0.429	1
Tnfsf12	0.0561261	0.505587	0.694	0.49	1
Rpl15	0.0562747	-0.215712	0.949	0.918	1
Preb	0.0563137	1.15005	0.214	0.082	1
Pawr	0.0563137	1.13173	0.214	0.082	1
Ppp2r3c	0.0563137	0.911767	0.214	0.082	1
Gm6710	0.0563645	1.88857	0.112	0.02	1
Coq3	0.0563645	1.93797	0.112	0.02	1
Ccdc136	0.0563645	1.79923	0.112	0.02	1
Il17ra	0.0563645	1.68753	0.112	0.02	1
Aph1b	0.0563645	1.60936	0.112	0.02	1
Wdr55	0.0563645	2.89124	0.112	0.02	1
Lmna	0.0564209	0.367093	0.878	0.796	1
Slc23a2	0.0564881	0.497747	0.245	0.102	1
H2-T23	0.0565656	0.560784	0.663	0.531	1
Rbm15b	0.056588	1.38014	0.173	0.061	1
Rnd2	0.056588	1.57694	0.173	0.061	1
Arl5c	0.0566037	-1.87118	0.041	0.122	1
Wdr27	0.0566037	-2.49901	0.041	0.122	1
Eny2	0.0566325	0.422415	0.694	0.551	1
Anp32a	0.0566619	-0.626096	0.459	0.592	1
Stx7	0.0566951	0.641313	0.378	0.224	1
Cebpz	0.0567763	-1.22771	0.255	0.388	1
Rps9	0.0567965	-0.235559	0.959	0.878	1
Spcs1	0.0568502	0.534974	0.837	0.714	1
Ppp1r1a	0.0568841	1.59302	0.051	0	1
Tsga10	0.0568858	2.13554	0.071	0	1
Pgap1	0.0568858	2.14176	0.071	0	1
Coq8a	0.0568858	2.2684	0.071	0	1
Irf6	0.0568858	1.83956	0.071	0	1
Tcp11l1	0.0568858	1.49038	0.071	0	1
Ralgapa2	0.0568858	2.42775	0.071	0	1
Zfp335	0.0568858	2.10991	0.071	0	1
Dclk2	0.0568858	2.75484	0.071	0	1
H4c14	0.0568858	2.14088	0.071	0	1
Tspan2	0.0568858	2.00392	0.071	0	1
Coro2a	0.0568858	1.99388	0.071	0	1
Slc24a2	0.0568858	1.64016	0.071	0	1
Rims3	0.0568858	2.3722	0.071	0	1
AU040320	0.0568858	2.04651	0.071	0	1
Cnpy1	0.0568858	2.21307	0.071	0	1
Pxmp2	0.0568858	2.38348	0.071	0	1
Rita1	0.0568858	2.34054	0.071	0	1
Gpr162	0.0568858	1.96666	0.071	0	1
Kcna5	0.0568858	2.32834	0.071	0	1
Parp11	0.0568858	2.01069	0.071	0	1
Opa3	0.0568858	2.04924	0.071	0	1
Zfp94	0.0568858	2.35793	0.071	0	1
Phldb3	0.0568858	2.44235	0.071	0	1
Grin2d	0.0568858	2.32366	0.071	0	1
Slco2b1	0.0568858	3.1136	0.071	0	1
Lyrm1	0.0568858	2.14446	0.071	0	1
Mtmr7	0.0568858	1.90071	0.071	0	1
Pgbd5	0.0568858	1.62339	0.071	0	1
Zbtb16	0.0568858	2.03157	0.071	0	1
Fam81a	0.0568858	1.39829	0.071	0	1
Filip1	0.0568858	3.62458	0.071	0	1
Ccdc117	0.0568858	1.91098	0.071	0	1
Cox10	0.0568858	2.56608	0.071	0	1
Tubg2	0.0568858	1.79415	0.071	0	1
Sgtb	0.0568858	1.92512	0.071	0	1
Letmd1	0.0568858	2.14858	0.071	0	1
Clcn2	0.0568858	2.27674	0.071	0	1
Zbtb11	0.0568858	2.34307	0.071	0	1
Mkx	0.0568858	2.90102	0.071	0	1
Pcdhb16	0.0568858	1.64562	0.071	0	1
Nrxn2	0.0568858	1.65824	0.071	0	1
Vsnl1	0.0568858	2.05624	0.061	0	1
Ltbp3	0.0569029	0.35598	0.816	0.673	1
Arl4d	0.0569193	1.80607	0.143	0.041	1
Tef	0.0571335	0.620874	0.52	0.327	1
Ankrd10	0.0571562	1.2132	0.367	0.204	1
Sdk1	0.0572091	0.607746	0.153	0.041	1
Gm973	0.0573005	1.49289	0.286	0.143	1
Slc29a3	0.057329	-2.48348	0.071	0.163	1
Slc43a2	0.0574877	1.61577	0.173	0.061	1
Ripor3	0.0574918	1.58438	0.112	0.02	1
Mpp2	0.0574918	2.09799	0.112	0.02	1
Dock10	0.0574973	0.701956	0.255	0.102	1
Tesk1	0.0576897	1.05869	0.306	0.163	1
Fam20b	0.0576948	-1.66394	0.082	0.184	1
Jarid2	0.0576948	-1.76659	0.082	0.184	1
Fgfr3	0.0578353	-2.26596	0.041	0.122	1
Hectd3	0.0579164	1.72672	0.143	0.041	1
Aff1	0.0580715	0.590754	0.327	0.163	1
Usp10	0.0581839	0.649673	0.153	0.041	1
Insr	0.0582015	1.31985	0.184	0.061	1
Cwc27	0.0583454	1.44354	0.204	0.082	1
Susd6	0.0584755	0.714706	0.367	0.204	1
Amdhd2	0.058488	1.22674	0.235	0.102	1
F11r	0.0586378	1.52046	0.112	0.02	1
Sdad1	0.0586378	-1.29954	0.051	0.143	1
Slc25a37	0.0586378	1.58054	0.112	0.02	1
Chodl	0.0586378	-0.93938	0.051	0.143	1
Spata24	0.0586378	1.48352	0.112	0.02	1
Ypel4	0.0589281	1.6723	0.143	0.041	1
Uba5	0.0590884	-0.983615	0.306	0.449	1
Sipa1l3	0.059089	-1.88192	0.041	0.122	1
Otud4	0.0591033	0.836141	0.184	0.061	1
Cldnd1	0.0592162	0.603792	0.51	0.347	1
Lxn	0.0593041	0.686978	0.378	0.224	1
Enho	0.0593227	2.20982	0.173	0.061	1
Itch	0.0593258	-0.942797	0.224	0.347	1
Ctbp2	0.059329	0.479158	0.367	0.184	1
Calr	0.0593644	-0.570574	0.898	0.857	1
Vgll3	0.0593836	0.811646	0.418	0.265	1
Ccnd2	0.0594665	-0.567687	0.612	0.653	1
Gask1b	0.0595226	-0.970624	0.357	0.469	1
Tmem185b	0.0598028	2.05414	0.112	0.02	1
Tbc1d8b	0.0598028	1.45213	0.112	0.02	1
Rhno1	0.0598028	1.53741	0.112	0.02	1
Slc7a7	0.0598028	1.38493	0.112	0.02	1
Nme2	0.0598028	-1.38188	0.051	0.143	1
Btbd6	0.0598028	1.32778	0.112	0.02	1
Bscl2	0.05992	0.841163	0.378	0.204	1
Eif4h	0.0599305	0.383043	0.663	0.449	1
Rasl11a	0.0600166	-1.0032	0.184	0.061	1
Tomm40	0.0601858	-0.942597	0.224	0.367	1
Sgce	0.0602788	0.416214	0.602	0.408	1
Tob1	0.0603705	0.96686	0.49	0.347	1
Itgb1bp1	0.0605017	0.856513	0.367	0.204	1
Dock5	0.0605042	-1.09042	0.112	0.224	1
Klf13	0.0605775	0.506135	0.602	0.469	1
Rabggtb	0.0605961	-1.02777	0.255	0.367	1
mt-Atp6	0.060681	-0.148816	1	0.98	1
Poglut1	0.0606813	-2.44522	0.082	0.184	1
Nit1	0.0607399	0.864553	0.265	0.122	1
Hsp90aa1	0.0608261	0.407572	0.745	0.633	1
Ddx47	0.0609261	-1.31113	0.153	0.265	1
Impact	0.0609477	0.815072	0.347	0.184	1
Zfp637	0.0609838	0.485747	0.388	0.224	1
Plekha8	0.0609868	-1.44999	0.051	0.143	1
Bmp5	0.0609868	1.3863	0.112	0.02	1
Inhbb	0.0609955	1.669	0.143	0.041	1
Fli1	0.0609955	1.50372	0.143	0.041	1
Ube2l6	0.0611899	0.851621	0.367	0.204	1
Hmgb2	0.0611899	0.46699	0.367	0.204	1
Igip	0.061206	1.48721	0.173	0.061	1
Dtymk	0.061312	-0.866007	0.439	0.531	1
Xpc	0.0613256	0.922259	0.378	0.224	1
Trrap	0.0615265	1.01914	0.265	0.122	1
Coq2	0.0616304	1.24136	0.316	0.184	1
Car11	0.0618242	1.34417	0.204	0.082	1
Slc25a23	0.0618242	1.20502	0.204	0.082	1
Ucp2	0.0618785	-0.169174	0.184	0.061	1
Plin2	0.0618846	0.848214	0.367	0.204	1
Pfn2	0.0620207	0.600749	0.469	0.265	1
Kazn	0.0620515	1.57798	0.143	0.041	1
Akap8	0.0620619	0.788441	0.245	0.102	1
Nfxl1	0.0620735	-2.84857	0.031	0.102	1
Eif3e	0.0621694	0.28026	0.694	0.51	1
Pigm	0.0621902	2.14118	0.112	0.02	1
Ctu2	0.0621902	1.07553	0.112	0.02	1
Nsun3	0.0621902	1.06028	0.112	0.02	1
Lix1	0.0621902	1.51745	0.112	0.02	1
Tfe3	0.0622519	-1.006	0.163	0.286	1
Rps3	0.0623643	-0.27714	0.949	0.918	1
2310009B15Rik	0.062526	-0.99918	0.204	0.347	1
Phldb1	0.0627048	0.847762	0.378	0.224	1
Chpt1	0.0628195	0.422016	0.571	0.408	1
Dtd1	0.0628868	0.497199	0.418	0.245	1
Zranb1	0.0629193	0.709132	0.48	0.306	1
Yipf2	0.0629863	-1.8225	0.041	0.122	1
Rprd1b	0.0630345	2.21999	0.224	0.102	1
Jmy	0.0631037	0.714086	0.327	0.163	1
Dcaf17	0.0631159	0.723221	0.214	0.082	1
Lmbr1	0.0631226	1.37918	0.143	0.041	1
Fbrsl1	0.0631226	1.4382	0.143	0.041	1
Mief2	0.0631226	1.1873	0.143	0.041	1
Gm38394	0.0631386	1.46568	0.173	0.061	1
Ppp2r3a	0.0631386	1.31671	0.173	0.061	1
Map3k4	0.0631386	1.20991	0.173	0.061	1
F830016B08Rik	0.0631386	1.03852	0.173	0.061	1
Pitpnb	0.0631409	0.719075	0.5	0.306	1
Atxn1	0.0631559	0.936786	0.337	0.184	1
Pepd	0.0632773	-1.14155	0.112	0.224	1
Tecr	0.0632975	0.612926	0.704	0.592	1
Psen2	0.0633736	0.53097	0.378	0.204	1
Acp5	0.0634132	1.18613	0.112	0.02	1
Pbxip1	0.0634782	0.960163	0.602	0.51	1
Bbc3	0.0635509	-2.60504	0.031	0.102	1
Nup88	0.0635595	-1.05477	0.173	0.286	1
St13	0.0635764	0.35244	0.735	0.51	1
Sft2d2	0.0636969	0.576272	0.357	0.184	1
Ccdc25	0.0636969	0.426287	0.357	0.184	1
Spata6	0.0640026	1.72938	0.194	0.082	1
Naa60	0.0640988	1.06155	0.286	0.143	1
Ube3b	0.0641237	1.43538	0.173	0.061	1
Actr8	0.0641237	1.80472	0.173	0.061	1
Adh1	0.0642089	1.72705	0.143	0.041	1
Mrps12	0.0642865	-0.673879	0.459	0.531	1
Def8	0.0643317	-1.51797	0.041	0.122	1
Psat1	0.0643317	-1.6641	0.041	0.122	1
Sun2	0.0646207	1.35569	0.265	0.143	1
Cystm1	0.0648477	0.583111	0.184	0.102	1
Fkbp8	0.0648621	0.577302	0.602	0.429	1
Cop1	0.0648779	1.58249	0.316	0.163	1
Engase	0.0650572	-2.36482	0.031	0.102	1
Pwwp2a	0.0651214	1.39878	0.173	0.061	1
Atad2b	0.0651214	0.932062	0.173	0.061	1
Zfp787	0.0651763	0.883688	0.235	0.102	1
Timm23	0.0651872	-0.868056	0.418	0.51	1
Tmem203	0.0652219	-0.762982	0.255	0.122	1
Sbno2	0.0653092	0.808296	0.398	0.245	1
Dhx8	0.0653106	1.1265	0.143	0.041	1
Ccdc112	0.0653106	1.7937	0.143	0.041	1
Ccdc107	0.0654344	0.868207	0.51	0.388	1
Kpnb1	0.0655236	0.614678	0.378	0.204	1
Ube4b	0.0656666	1.38222	0.224	0.102	1
Nek9	0.0656967	0.792506	0.286	0.143	1
Fth1	0.0659401	0.253827	1	1	1
Zfp266	0.0660199	0.959817	0.296	0.163	1
Nfkbil1	0.0660993	0.911369	0.296	0.143	1
Cradd	0.0661318	1.43795	0.173	0.061	1
Slc36a4	0.0661318	1.2739	0.173	0.061	1
Nsg1	0.0661825	0.395342	0.704	0.51	1
Laptm4a	0.0662214	0.149346	0.969	0.898	1
Cd302	0.0663374	0.180291	0.908	0.837	1
Slc31a1	0.0664179	-0.778612	0.204	0.347	1
Alkal2	0.0664278	0.637848	0.143	0.041	1
Atp5e	0.0664301	-0.268828	0.918	0.878	1
Chchd10	0.0665247	1.14407	0.306	0.163	1
Baz1a	0.0665928	-2.08761	0.031	0.102	1
Thumpd2	0.0665928	-1.79292	0.031	0.102	1
Kdelr3	0.0666636	-0.577163	0.531	0.633	1
Pdk2	0.0668524	1.55794	0.194	0.082	1
Gnb4	0.0669036	0.719284	0.337	0.184	1
Mrpl9	0.0669201	1.38864	0.255	0.122	1
Apoe	0.0670155	0.431798	0.847	0.755	1
Selenoi	0.0670938	-0.733627	0.041	0.122	1
Lrba	0.0671552	1.37457	0.173	0.061	1
Naa30	0.067191	-1.63561	0.071	0.163	1
Dcun1d1	0.0671947	0.721731	0.245	0.102	1
Wtip	0.0672059	0.995852	0.418	0.286	1
Slc39a6	0.0672722	-0.206311	0.265	0.122	1
Rrp7a	0.0673272	-1.11725	0.163	0.286	1
Tufm	0.0673638	1.99186	0.163	0.061	1
Bace1	0.0674422	0.370435	0.48	0.286	1
Heatr5b	0.0675608	1.36825	0.143	0.041	1
Rex1bd	0.0675726	-0.476439	0.653	0.735	1
Atn1	0.0675942	0.622439	0.398	0.224	1
Chd3	0.0676644	0.419692	0.653	0.449	1
Ackr4	0.0676757	0.926893	0.276	0.143	1
Sdhaf2	0.0677186	0.703178	0.327	0.184	1
Htra2	0.0677827	1.06571	0.255	0.122	1
Manbal	0.0677849	0.854746	0.48	0.347	1
Ctbp1	0.0678613	-0.530225	0.571	0.673	1
Psmb4	0.0678709	0.378212	0.776	0.612	1
Hnrnpul1	0.0679984	-0.793772	0.306	0.449	1
Oga	0.0681739	0.97815	0.347	0.204	1
Fzd4	0.0685109	-1.19585	0.041	0.122	1
Cog1	0.0687096	0.620898	0.143	0.041	1
Emd	0.0687272	0.77762	0.408	0.245	1
Fgfr1op2	0.0687336	-1.01363	0.449	0.571	1
Cybrd1	0.0687499	0.483386	0.235	0.102	1
Maf	0.0688346	0.454778	0.704	0.571	1
Lsm6	0.0688977	-0.728217	0.469	0.551	1
Dipk1b	0.0689194	0.911126	0.398	0.245	1
Serpinb6a	0.0691689	0.529573	0.714	0.592	1
Tmem263	0.0692906	0.617007	0.327	0.163	1
Ddx21	0.0693649	-1.13524	0.194	0.306	1
Glrx2	0.0695546	0.68929	0.51	0.347	1
Pamr1	0.0697225	0.643162	0.347	0.204	1
Casp12	0.0697841	0.7708	0.48	0.327	1
Agpat4	0.0698163	-0.102572	0.388	0.245	1
Prkd3	0.0698355	0.780077	0.286	0.143	1
Tex264	0.0698552	0.568911	0.531	0.327	1
Sf3a3	0.0698901	0.140232	0.316	0.143	1
Wwtr1	0.070088	0.541862	0.551	0.367	1
Tmed1	0.070136	-0.281119	0.49	0.306	1
Grik5	0.0702224	1.38265	0.276	0.143	1
Rpl23	0.0702706	-0.282836	0.969	0.918	1
Inmt	0.0704075	1.58572	0.429	0.306	1
Olfml1	0.0704102	1.04705	0.408	0.286	1
Zfp938	0.0705922	1.87318	0.163	0.061	1
S100a10	0.0706993	-0.462009	0.673	0.735	1
Bcl2l2	0.0708138	1.15702	0.194	0.082	1
Saraf	0.0709063	0.761637	0.673	0.551	1
Ttc7	0.0709234	3.95305	0.102	0.02	1
Dctn6	0.0709914	0.52581	0.582	0.408	1
Dmd	0.0710553	0.97976	0.143	0.041	1
Mia2	0.0710741	0.315496	0.408	0.265	1
Rbm45	0.0712392	-2.58479	0.02	0.082	1
Jade1	0.0712657	0.467678	0.316	0.163	1
Gemin2	0.0713796	-1.86699	0.031	0.102	1
Ccdc134	0.0713796	-1.71824	0.031	0.102	1
Arhgap12	0.0713798	0.788872	0.173	0.061	1
Oat	0.0715309	0.360134	0.857	0.653	1
Retreg3	0.0716409	0.744857	0.265	0.122	1
Krtcap3	0.071769	-2.60735	0	0.061	1
Sp100	0.071769	-5.22924	0.01	0.061	1
Mlph	0.071769	-2.66403	0.01	0.061	1
Pask	0.071769	-3.25	0.01	0.061	1
Cd244a	0.071769	-3.36889	0.01	0.061	1
Hcar1	0.071769	-2.28812	0.01	0.061	1
Rab19	0.071769	-2.26056	0.01	0.061	1
Tmem202	0.071769	-3.20427	0.01	0.061	1
Foxd1	0.071769	-3.72628	0.01	0.061	1
Sumf2	0.0718125	-1.09111	0.163	0.286	1
Psmd1	0.0719173	-0.623985	0.378	0.531	1
Cd82	0.0719185	1.32217	0.286	0.163	1
Mmgt2	0.071922	0.550669	0.439	0.265	1
Nr4a3	0.072002	2.21097	0.133	0.041	1
Pdlim5	0.0720032	0.646189	0.5	0.367	1
Lbh	0.0720995	1.19236	0.347	0.204	1
Nhlrc2	0.0721614	1.44106	0.224	0.102	1
Ccdc71	0.0722526	1.11127	0.143	0.041	1
Nabp2	0.0723067	0.400189	0.388	0.204	1
Raph1	0.0724198	0.289609	0.286	0.143	1
Rasl11b	0.0724198	0.859944	0.286	0.143	1
Rilpl1	0.0724831	0.967637	0.235	0.102	1
Tmem141	0.0728655	1.6271	0.194	0.082	1
Tspyl4	0.0728655	1.47732	0.194	0.082	1
Fech	0.0728721	0.387293	0.398	0.224	1
Tagln	0.0729456	0.405506	0.755	0.592	1
Pex11g	0.0730365	-0.495823	0.031	0.102	1
Slc10a7	0.0730365	-1.65957	0.031	0.102	1
Fam49a	0.0730365	-1.44365	0.031	0.102	1
Smagp	0.0730365	-1.68955	0.031	0.102	1
Tuba1b	0.0730978	-0.446652	0.673	0.673	1
Wiz	0.0731308	1.05179	0.224	0.102	1
Apba3	0.0732479	-1.67178	0.071	0.163	1
Pinx1	0.0732479	-2.61174	0.071	0.163	1
Kansl3	0.0732985	0.931998	0.286	0.143	1
Adm	0.0733034	0.218295	0.204	0.082	1
Srebf2	0.0736648	-1.40241	0.143	0.245	1
Cdc5l	0.0737414	0.7458	0.439	0.286	1
Nebl	0.0737836	1.84885	0.102	0.02	1
Socs7	0.0737836	1.80844	0.102	0.02	1
Arhgef17	0.0738474	0.443281	0.357	0.204	1
Sgcd	0.0739095	-0.265378	0.194	0.082	1
Tead3	0.0739095	1.21553	0.194	0.082	1
Dpy19l3	0.073935	-0.972117	0.082	0.184	1
Rapgef4	0.074099	-2.49973	0.01	0.061	1
Fsip1	0.074099	-2.17048	0.01	0.061	1
3300002I08Rik	0.074099	-2.08185	0.01	0.061	1
Tnfrsf25	0.074099	-2.58589	0.01	0.061	1
Gtpbp10	0.074099	-2.44604	0.01	0.061	1
Fgd5	0.074099	-2.16798	0.01	0.061	1
Dedd2	0.074099	-2.07393	0.01	0.061	1
Gas2	0.074099	-1.91679	0.01	0.061	1
Gch1	0.074099	-2.69524	0.01	0.061	1
Zfp426	0.074099	-2.98433	0.01	0.061	1
Serpinb1a	0.074099	-2.04792	0.01	0.061	1
Ncald	0.074099	-2.03165	0.01	0.061	1
Fam174b	0.0741108	1.3503	0.224	0.102	1
Znhit6	0.074191	0.720382	0.5	0.347	1
Arnt	0.0742507	0.561041	0.327	0.163	1
Nfu1	0.0742507	0.492615	0.469	0.306	1
Sec22a	0.074334	0.490201	0.204	0.082	1
Spire1	0.074334	0.56724	0.204	0.082	1
Synpo2	0.0743719	0.707211	0.265	0.122	1
D630045J12Rik	0.0744277	-1.10212	0.041	0.122	1
Utp20	0.0744277	-0.500803	0.041	0.122	1
Elp1	0.0745113	1.88132	0.133	0.041	1
Birc2	0.0745378	0.358149	0.296	0.143	1
Srpx	0.0746241	0.288426	0.48	0.286	1
Usf1	0.074666	1.26156	0.214	0.102	1
Tent4a	0.0746891	0.673572	0.173	0.061	1
Atp9b	0.0746967	1.0683	0.143	0.041	1
Vdr	0.0747248	-2.13019	0.031	0.102	1
AW554918	0.0747248	-0.8288	0.031	0.102	1
Pcyox1l	0.0747248	-1.94046	0.031	0.102	1
Zbtb7c	0.0747248	-2.23124	0.031	0.102	1
Ttc3	0.0747578	0.688367	0.582	0.388	1
Ndufs4	0.0747943	0.283217	0.704	0.592	1
Atp2b4	0.0749032	0.683409	0.5	0.306	1
Bckdha	0.0750178	0.874401	0.255	0.122	1
Cyp26b1	0.0750599	1.04289	0.327	0.184	1
Tcf7	0.0750797	-2.39176	0.02	0.082	1
H2bc6	0.0750797	-2.40312	0.02	0.082	1
Arxes2	0.0750931	1.65593	0.163	0.061	1
Dhx16	0.0750931	1.42506	0.163	0.061	1
Pdk1	0.0752487	2.21539	0.102	0.02	1
Polg2	0.0752487	1.50093	0.102	0.02	1
Zfp825	0.0752487	2.214	0.102	0.02	1
Prune2	0.0752487	3.14799	0.102	0.02	1
Bst2	0.0753772	0.478063	0.796	0.755	1
Yif1b	0.075472	0.544066	0.582	0.388	1
Slc25a4	0.0754756	0.374614	0.959	0.857	1
Parp14	0.0755517	1.29384	0.276	0.143	1
Amacr	0.0759439	0.353862	0.143	0.041	1
Cenpq	0.0759439	0.858911	0.143	0.041	1
Mrpl10	0.0761031	0.347232	0.224	0.102	1
Hbegf	0.0764448	-1.55569	0.031	0.102	1
Pcmtd2	0.0764712	1.10667	0.276	0.143	1
Cpa6	0.0764906	-2.07212	0.01	0.061	1
Tyw3	0.0764906	-1.94763	0.01	0.061	1
Pex10	0.0764906	-2.3029	0.01	0.061	1
Pex1	0.0764906	-2.11845	0.01	0.061	1
Zfp619	0.0764906	-1.96842	0.01	0.061	1
Lefty1	0.0765397	0.290864	0.245	0.122	1
Myo9b	0.0765397	1.21148	0.245	0.122	1
Larp4b	0.0765769	0.216004	0.306	0.143	1
Fam49b	0.0767015	-1.50148	0.143	0.245	1
Prph	0.0767361	1.82731	0.082	0.02	1
Ccdc28a	0.0767375	1.78379	0.102	0.02	1
Kctd9	0.0767375	1.5613	0.102	0.02	1
Hspg2	0.0768346	-0.734141	0.735	0.571	1
Slc35c1	0.0770624	-1.95288	0.02	0.082	1
Eif2ak4	0.0770624	-2.09546	0.02	0.082	1
Fam107a	0.0770624	-1.96812	0.02	0.082	1
Leng9	0.0770916	-1.55689	0.071	0.163	1
Hddc3	0.0770916	-1.468	0.071	0.163	1
Aff4	0.0771124	0.690671	0.5	0.367	1
Txndc5	0.077156	0.226874	0.714	0.51	1
Taf13	0.0771874	0.384884	0.265	0.122	1
Hacl1	0.077208	0.620783	0.143	0.041	1
Rnf38	0.0774299	1.46944	0.163	0.061	1
Ginm1	0.0778547	-0.795172	0.561	0.633	1
Trap1	0.0781388	1.1612	0.224	0.102	1
Lancl1	0.078145	1.31302	0.255	0.143	1
Arglu1	0.0781664	-0.746289	0.622	0.673	1
Sh3rf3	0.0781969	-1.36233	0.031	0.102	1
Tirap	0.0781969	-1.50251	0.031	0.102	1
Prtn3	0.0782501	1.74589	0.102	0.02	1
Sv2c	0.0782501	1.7029	0.102	0.02	1
Stk32a	0.0782501	2.35231	0.102	0.02	1
mt-Nd2	0.0782792	-0.297045	0.98	1	1
Prpf3	0.0784088	1.79467	0.133	0.041	1
Pcid2	0.0784088	1.5801	0.133	0.041	1
Uaca	0.0785382	0.790137	0.306	0.163	1
Fnbp1	0.078764	0.769128	0.347	0.204	1
Rerg	0.0788589	0.495335	0.357	0.204	1
Cenpf	0.0789447	-1.18559	0.01	0.061	1
Fam120c	0.0789447	-1.69044	0.01	0.061	1
Tmem154	0.0789447	-1.34931	0.01	0.061	1
Nos3	0.0789447	-1.81218	0.01	0.061	1
Aasdh	0.0789447	-1.3647	0.01	0.061	1
Pctp	0.0789447	-1.61409	0.01	0.061	1
Arl10	0.0789447	-0.323743	0.01	0.061	1
Wnt10b	0.0789447	-1.80439	0.01	0.061	1
Supt16	0.0790409	-0.777468	0.245	0.388	1
Endod1	0.0790587	0.271753	0.316	0.163	1
Rab25	0.0790852	1.59502	0.041	0	1
Ddx59	0.0790877	-2.18739	0.02	0.082	1
Epm2a	0.0790877	-1.73573	0.02	0.082	1
Fbxl8	0.0790877	-1.71963	0.02	0.082	1
Tmem267	0.0790877	-2.24665	0.02	0.082	1
Prelid3a	0.0790877	-1.77332	0.02	0.082	1
Smarcal1	0.0790877	1.97834	0.061	0	1
Rab7b	0.0790877	1.86262	0.061	0	1
Opn3	0.0790877	2.24066	0.061	0	1
Fam71a	0.0790877	3.15961	0.061	0	1
Echdc3	0.0790877	2.52731	0.061	0	1
Zbtb26	0.0790877	2.53542	0.061	0	1
Scn9a	0.0790877	1.95693	0.061	0	1
Ccdc73	0.0790877	1.85056	0.061	0	1
Rem1	0.0790877	2.1744	0.061	0	1
Syn1	0.0790877	1.45671	0.061	0	1
Armcx6	0.0790877	2.22568	0.061	0	1
Pex5l	0.0790877	2.4662	0.061	0	1
Ccdc39	0.0790877	1.83784	0.061	0	1
Plk4	0.0790877	2.32233	0.061	0	1
Mcoln3	0.0790877	3.04161	0.061	0	1
Spaca1	0.0790877	2.55845	0.061	0	1
Pakap.2	0.0790877	1.54129	0.061	0	1
Pank4	0.0790877	1.9582	0.061	0	1
Nupl2	0.0790877	2.02075	0.061	0	1
Adgrl3	0.0790877	1.50733	0.061	0	1
Rpap2	0.0790877	2.06896	0.061	0	1
Gm20696	0.0790877	1.85695	0.061	0	1
Vamp1	0.0790877	1.34868	0.061	0	1
Bicd1	0.0790877	1.55328	0.061	0	1
Sptbn4	0.0790877	1.26185	0.061	0	1
Fcgbp	0.0790877	1.51919	0.061	0	1
Tulp2	0.0790877	1.77772	0.061	0	1
Pgpep1l	0.0790877	1.51133	0.061	0	1
Cep85l	0.0790877	2.89433	0.061	0	1
Fam184a	0.0790877	1.91965	0.061	0	1
Adamts14	0.0790877	1.64075	0.061	0	1
Gm4924	0.0790877	1.54881	0.061	0	1
Syt1	0.0790877	2.19257	0.061	0	1
Rab11fip1	0.0790877	1.41379	0.061	0	1
Gm10643	0.0790877	2.13929	0.061	0	1
Fam92b	0.0790877	1.90022	0.061	0	1
Sgcg	0.0790877	4.76677	0.061	0	1
Cntn5	0.0790877	2.57587	0.061	0	1
Igsf9b	0.0790877	1.84978	0.061	0	1
Gadl1	0.0790877	1.14872	0.061	0	1
B3gnt2	0.0790877	1.10902	0.061	0	1
Bcl11a	0.0790877	1.73365	0.061	0	1
Zkscan6	0.0790877	1.80077	0.061	0	1
Gga3	0.0790877	1.79422	0.061	0	1
Zfp65	0.0790877	2.07771	0.061	0	1
Efcab10	0.0790877	3.6678	0.061	0	1
Crppa	0.0790877	2.53463	0.061	0	1
Gpr135	0.0790877	1.57865	0.061	0	1
Kcnk10	0.0790877	1.902	0.061	0	1
Csrnp2	0.0790877	1.11728	0.061	0	1
Tmem186	0.0790877	2.07016	0.061	0	1
Ypel1	0.0790877	1.60677	0.061	0	1
Slc7a4	0.0790877	1.76734	0.061	0	1
Cxadr	0.0790877	1.67242	0.061	0	1
Pacrg	0.0790877	1.98616	0.061	0	1
Cyp39a1	0.0790877	2.44912	0.061	0	1
Srbd1	0.0790877	1.93699	0.061	0	1
Celf4	0.0790877	2.20685	0.061	0	1
Ecscr	0.0790877	3.16443	0.061	0	1
Gldc	0.0790877	2.25818	0.061	0	1
1110017D15Rik	0.0790877	0.921614	0.051	0	1
Pde1c	0.0790877	0.928412	0.051	0	1
Kif5a	0.0790877	1.55566	0.051	0	1
Gna14	0.0793142	2.2105	0.194	0.082	1
Serp1	0.0793907	-0.875967	0.418	0.531	1
Gata3	0.0794114	0.808713	0.327	0.184	1
Gls	0.0794289	0.139811	0.582	0.367	1
Vkorc1	0.07965	-0.389899	0.622	0.694	1
Cttn	0.0796771	0.817827	0.418	0.306	1
Ncoa3	0.0797317	1.19753	0.265	0.143	1
Mfsd6	0.079787	1.46728	0.102	0.02	1
Chst7	0.079787	1.56138	0.102	0.02	1
Fbxo44	0.079787	1.63253	0.102	0.02	1
Samd1	0.079787	1.87454	0.102	0.02	1
Slc38a7	0.079787	1.52836	0.102	0.02	1
Plcxd3	0.079787	1.53579	0.102	0.02	1
Adsl	0.079787	1.47725	0.102	0.02	1
Seh1l	0.0798395	1.45349	0.214	0.102	1
Wfdc18	0.0799476	-5.12657	0	0.02	1
Prdx4	0.0800697	0.526793	0.622	0.449	1
Sppl2a	0.0800773	0.121703	0.449	0.306	1
Lamb2	0.0802467	0.280915	0.5	0.327	1
Rplp0	0.0803424	-0.243878	0.959	0.878	1
Ptma	0.0803553	-0.33068	0.959	0.898	1
Stra6	0.0804328	0.225284	0.194	0.082	1
Klhl28	0.0804328	1.22379	0.194	0.082	1
Gnai3	0.0804513	-0.676891	0.306	0.449	1
Tceanc2	0.0804658	-2.0577	0.061	0.143	1
Nudt22	0.0805015	1.13211	0.245	0.122	1
Hnrnph1	0.0809097	-0.52173	0.612	0.653	1
R3hdm1	0.0809532	-0.871849	0.204	0.327	1
Rpl22	0.0809725	-0.23668	0.918	0.878	1
Apol9a	0.0810409	1.90146	0.184	0.082	1
Cpz	0.0810759	1.88353	0.255	0.143	1
Pag1	0.0810981	1.51471	0.133	0.041	1
Skap1	0.0810981	1.57935	0.133	0.041	1
Metap2	0.0811177	-0.671991	0.714	0.776	1
Helq	0.0811559	-1.59468	0.02	0.082	1
Bola1	0.0811927	-1.36207	0.296	0.408	1
Irak2	0.0813483	1.32747	0.102	0.02	1
Grtp1	0.0813483	1.21999	0.102	0.02	1
Eri1	0.0813483	1.44289	0.102	0.02	1
Rcan1	0.0813483	2.28358	0.102	0.02	1
Vit	0.0813483	2.77414	0.102	0.02	1
Ints6	0.0813655	-1.47332	0.092	0.184	1
Aebp2	0.0815175	1.02154	0.245	0.122	1
Slc41a3	0.0815642	0.880648	0.194	0.082	1
Otulin	0.0816393	0.898922	0.296	0.163	1
Mylk	0.0817953	1.05639	0.704	0.653	1
Pomp	0.0820988	0.348512	0.786	0.694	1
Prpf40a	0.0821984	-0.831175	0.327	0.469	1
Ttc38	0.0822812	1.37815	0.163	0.061	1
Gpha2	0.0822812	3.1605	0.163	0.061	1
Lzic	0.0825439	0.869778	0.245	0.122	1
Ahnak2	0.0825456	0.57154	0.235	0.102	1
Arpc3	0.0825742	0.240654	0.796	0.612	1
Anapc11	0.0826334	0.768066	0.633	0.531	1
Copz2	0.082664	0.375401	0.673	0.51	1
Cog4	0.0827084	1.02263	0.194	0.082	1
Prpf39	0.0827084	1.18433	0.194	0.082	1
C2cd3	0.0829343	1.22297	0.102	0.02	1
Tcim	0.0829343	0.989738	0.102	0.02	1
Nectin1	0.0829343	1.42436	0.102	0.02	1
Rnf227	0.0829343	1.0878	0.102	0.02	1
Nptxr	0.0829343	1.45057	0.102	0.02	1
Fgd4	0.0829343	1.39214	0.102	0.02	1
Krit1	0.0830805	0.890726	0.378	0.224	1
Zfand6	0.0830945	0.792237	0.459	0.306	1
Dhdds	0.0832854	-1.0697	0.122	0.224	1
Psip1	0.0833342	0.726099	0.469	0.327	1
Vav2	0.0833979	-1.35487	0.061	0.143	1
Mta2	0.0834225	0.618435	0.224	0.102	1
Rps8	0.0836167	-0.217777	0.969	0.898	1
Ssbp2	0.0836431	0.414994	0.469	0.306	1
Ssh2	0.0836793	0.835635	0.316	0.163	1
Bach2	0.0838618	-1.3924	0.071	0.163	1
Rabl2	0.0838618	2.47881	0.133	0.041	1
Rtn2	0.0841303	0.830175	0.173	0.061	1
Dgat1	0.0841303	-1.11832	0.102	0.204	1
Camk2g	0.0841323	0.473567	0.306	0.163	1
Atraid	0.0841652	0.300536	0.837	0.714	1
Rps26	0.0842446	-0.442535	0.908	0.898	1
Strap	0.0844234	-0.215883	0.469	0.592	1
Snrpb2	0.0844396	0.906124	0.388	0.245	1
Ireb2	0.0845132	0.96263	0.224	0.102	1
Fgf10	0.0845381	0.366566	0.286	0.143	1
Elf4	0.0845452	1.05814	0.102	0.02	1
Ppp1r13b	0.0845452	0.709184	0.102	0.02	1
Hira	0.0845452	1.0153	0.102	0.02	1
Nfib	0.0846279	0.339868	0.765	0.571	1
Robo1	0.0846282	0.92767	0.245	0.122	1
Akirin2	0.0847009	0.695401	0.531	0.388	1
Lama4	0.0849138	-0.158913	0.653	0.49	1
Tln1	0.0849335	0.536043	0.673	0.51	1
Arid5a	0.085036	0.721096	0.194	0.082	1
Prkx	0.085272	1.23081	0.133	0.041	1
Nr2f2	0.0853264	-0.339273	0.51	0.347	1
Dop1a	0.0853755	-1.00353	0.102	0.204	1
Psma7	0.0855193	-0.503634	0.806	0.755	1
Gulp1	0.0856258	0.65772	0.408	0.265	1
Romo1	0.0857473	-0.448181	0.786	0.776	1
Phb2	0.085888	-0.632335	0.531	0.612	1
Atg14	0.0860791	1.24857	0.163	0.061	1
Supt4a	0.0860992	0.637645	0.571	0.429	1
Syap1	0.0861772	0.571166	0.276	0.143	1
Kcnma1	0.0861814	0.336502	0.102	0.02	1
Ints2	0.0861814	0.531679	0.102	0.02	1
Tmed4	0.0864511	0.5657	0.429	0.265	1
Gorasp2	0.0864534	-0.790358	0.316	0.429	1
Cast	0.0864798	0.547093	0.531	0.408	1
Slc24a5	0.0867013	1.47044	0.133	0.041	1
Fbxo42	0.0867013	1.41755	0.133	0.041	1
Atrnl1	0.0867013	1.93764	0.133	0.041	1
Ndufs1	0.0868026	1.39922	0.286	0.163	1
Gng11	0.0868127	0.313376	0.571	0.388	1
Trim27	0.0869755	1.43151	0.184	0.082	1
Olfml2a	0.0870413	0.870889	0.255	0.122	1
Pole4	0.0870479	-0.727673	0.224	0.327	1
Postn	0.0872929	-1.7176	0.459	0.551	1
Trim32	0.0873761	0.378831	0.163	0.061	1
Gm14305	0.0874162	0.883515	0.194	0.082	1
Chmp5	0.0874693	0.420302	0.612	0.449	1
Hnrnpdl	0.0875308	-0.615363	0.592	0.653	1
Mest	0.0876254	0.44853	0.02	0.082	1
Tgfb3	0.0877495	0.724446	0.531	0.367	1
Prr14	0.0878547	0.807695	0.224	0.102	1
Isg15	0.087876	0.909143	0.684	0.551	1
Snx11	0.0879576	-1.72344	0.061	0.143	1
Htatip2	0.0880377	-0.206071	0.306	0.163	1
Med29	0.0881453	-0.887287	0.306	0.429	1
Dusp16	0.0881499	1.13883	0.133	0.041	1
Cutc	0.0881499	1.17205	0.133	0.041	1
Mrgbp	0.0882036	1.58023	0.184	0.082	1
Nr2f6	0.0882331	0.902101	0.398	0.265	1
Eif3m	0.0885507	0.479582	0.602	0.49	1
Cep44	0.0886263	0.897399	0.194	0.082	1
Aqp4	0.0886391	1.11473	0.102	0.041	1
Ppp3ca	0.0886457	-0.73094	0.531	0.673	1
Gpnmb	0.0886888	1.79472	0.163	0.061	1
Ddx56	0.0886888	1.22096	0.163	0.061	1
Gabpa	0.0887198	1.28688	0.214	0.102	1
Wdr45	0.0888266	-0.512493	0.296	0.143	1
Rnf138	0.0889245	1.163	0.245	0.122	1
Puf60	0.0889789	0.754717	0.429	0.286	1
Sesn3	0.0889993	0.946448	0.449	0.327	1
Bhlhe41	0.0896154	0.318292	0.286	0.143	1
Slc18b1	0.0896179	-1.05782	0.071	0.163	1
Ift122	0.0896179	1.19336	0.133	0.041	1
Asl	0.0898499	0.980907	0.194	0.082	1
Fbxo2	0.0898838	0.809416	0.214	0.102	1
Appbp2	0.0898966	-0.617797	0.224	0.367	1
Ank2	0.0900045	0.745052	0.49	0.367	1
Spryd7	0.0900173	-2.15473	0.102	0.184	1
Calcrl	0.0901088	-1.12279	0.296	0.408	1
Mogs	0.090141	-0.236297	0.224	0.102	1
Ostm1	0.090141	0.62225	0.224	0.102	1
Tmem160	0.0901925	0.501077	0.704	0.49	1
Eef1g	0.0903301	0.330207	0.786	0.612	1
Ubxn1	0.0904206	0.365563	0.816	0.673	1
Hagh	0.0904232	0.596259	0.398	0.245	1
Thoc2l	0.0905745	0.524607	0.388	0.224	1
Fam32a	0.0909773	0.472564	0.367	0.224	1
Hsdl1	0.0911055	0.550284	0.133	0.041	1
Sult5a1	0.0911055	0.824292	0.133	0.041	1
Wrb	0.0911055	1.21591	0.133	0.041	1
Wdr26	0.0911854	0.748818	0.49	0.388	1
Gnpnat1	0.0913788	-1.09636	0.173	0.286	1
Nipa2	0.0913908	1.20663	0.276	0.143	1
Cd99l2	0.0914106	0.769252	0.337	0.184	1
Rnaseh2c	0.0914745	1.00317	0.51	0.367	1
Ewsr1	0.0915255	0.65937	0.612	0.449	1
mt-Nd1	0.0916431	-0.212255	0.99	1	1
Iglon5	0.0919723	-1.61055	0.092	0.184	1
Rap2a	0.0920383	0.920909	0.265	0.143	1
Ranbp2	0.0920469	0.133077	0.347	0.184	1
Cct5	0.0920616	0.50192	0.663	0.469	1
Vps29	0.0920685	0.561987	0.612	0.49	1
Ptpdc1	0.0924899	0.529754	0.255	0.122	1
Ramp1	0.0925435	-1.64926	0.153	0.265	1
Ctso	0.092607	0.998717	0.347	0.204	1
Pafah2	0.092613	-0.593905	0.071	0.163	1
Ptpn21	0.092613	-0.374917	0.133	0.041	1
Rrp15	0.0927225	0.678878	0.163	0.061	1
Abca2	0.0927225	1.24815	0.163	0.061	1
Mterf4	0.0929684	-1.15777	0.122	0.224	1
Hcfc1	0.0930598	-0.744214	0.224	0.347	1
Cemip2	0.0930598	0.67184	0.306	0.184	1
Chpf2	0.0931237	1.38287	0.296	0.184	1
Fscn1	0.0931814	-1.30798	0.296	0.388	1
Tomm7	0.0933055	0.323144	0.847	0.735	1
Dst	0.0933498	0.29963	0.633	0.49	1
Pde4dip	0.0933948	0.864425	0.245	0.122	1
Igf1r	0.0934941	0.226449	0.714	0.49	1
Smtn	0.093555	0.887327	0.5	0.327	1
Lrrfip2	0.093576	-0.257347	0.316	0.163	1
Ddx10	0.0936118	-1.26019	0.173	0.286	1
Etfrf1	0.0936281	0.936811	0.296	0.163	1
Loxl1	0.0937881	0.316541	0.837	0.653	1
Calr4	0.0939215	4.38389	0.082	0	1
1810030O07Rik	0.0939913	-1.54794	0.112	0.204	1
Jcad	0.0940994	1.15679	0.163	0.061	1
Cdc14a	0.0941404	0.949643	0.133	0.041	1
Zfp322a	0.0941404	1.03454	0.133	0.041	1
Dcaf4	0.0941404	1.02893	0.133	0.041	1
Flii	0.0941466	0.459451	0.378	0.224	1
Snrnp27	0.0941852	0.420617	0.633	0.49	1
Errfi1	0.0942431	0.3744	0.561	0.388	1
Vps39	0.0943476	-0.819364	0.061	0.143	1
Cwf19l2	0.0943703	0.591895	0.388	0.224	1
Znhit1	0.0945523	-0.404254	0.429	0.265	1
Mrpl1	0.0948808	0.57258	0.194	0.082	1
Lmbrd1	0.0951197	0.356541	0.52	0.327	1
Dennd5a	0.0951211	0.464923	0.398	0.245	1
Exosc5	0.0951274	0.962671	0.286	0.163	1
Timp1	0.0954822	-2.25532	0.286	0.367	1
Inip	0.0954926	0.352994	0.163	0.061	1
Mdp1	0.0955973	-1.33408	0.265	0.367	1
Dock6	0.0956879	1.0394	0.133	0.041	1
Rfng	0.0956879	0.333139	0.133	0.041	1
Zfp410	0.0956879	0.877192	0.133	0.041	1
Ppp2cb	0.0957572	0.850032	0.296	0.163	1
Trp53inp2	0.0958884	0.562067	0.255	0.122	1
Khdrbs3	0.0960665	0.906099	0.224	0.102	1
Cald1	0.0962282	0.278038	0.929	0.796	1
Tmem248	0.0962642	-1.52548	0.133	0.224	1
Osbpl2	0.0965485	1.26767	0.235	0.122	1
Scd1	0.0968361	-1.18438	0.214	0.327	1
Ptger4	0.0968644	0.88592	0.245	0.122	1
Vps50	0.0969022	0.691369	0.163	0.061	1
Angptl1	0.0971471	0.82089	0.602	0.449	1
Rpsa	0.0972211	-0.273995	0.939	0.878	1
Bclaf3	0.0972557	1.73178	0.133	0.041	1
Jade2	0.0972557	0.906141	0.133	0.041	1
Tdp1	0.0972557	0.776463	0.133	0.041	1
Mob1b	0.0972886	-1.24605	0.153	0.265	1
Rnft1	0.0973056	0.533228	0.286	0.163	1
Nudt18	0.0974796	0.823637	0.194	0.082	1
Med13	0.0975037	0.246813	0.337	0.184	1
Mapk1ip1l	0.097597	0.94113	0.265	0.143	1
Samhd1	0.0976384	0.383055	0.469	0.306	1
Lpin1	0.0976777	1.56894	0.153	0.061	1
Senp3	0.0977405	-0.476355	0.235	0.122	1
Commd1	0.0980019	0.609549	0.602	0.51	1
Foxn3	0.0980187	0.664832	0.582	0.49	1
Cpt1c	0.0982091	0.534325	0.255	0.122	1
Chm	0.0983794	0.598975	0.214	0.102	1
Nt5c3	0.0983794	0.643993	0.214	0.102	1
Arhgef10	0.0984984	1.97733	0.092	0.02	1
Sqor	0.0988002	1.3217	0.194	0.082	1
Mtfmt	0.0988441	0.863542	0.133	0.041	1
Nipsnap1	0.0988466	-1.19993	0.133	0.224	1
Mast4	0.0990232	0.525818	0.296	0.163	1
Ost4	0.0993682	-0.319692	0.806	0.796	1
Ebf4	0.0993802	-1.25435	0.061	0.143	1
B3gnt8	0.0993802	-1.39503	0.061	0.143	1
Sucla2	0.0994328	0.194326	0.398	0.224	1
Tmtc2	0.0994658	-1.29763	0.122	0.224	1
Pmvk	0.0995505	-1.02638	0.163	0.265	1
Rps25	0.0997086	-0.303566	0.929	0.878	1
Sf3b1	0.0997819	0.493245	0.653	0.592	1
Pcgf2	0.0998955	0.865899	0.184	0.082	1
Timp3	0.100023	-0.213562	0.847	0.837	1
Ebna1bp2	0.100104	0.724502	0.429	0.286	1
Ccs	0.100173	0.819544	0.52	0.367	1
Ptges3	0.100335	-0.766921	0.52	0.592	1
Hrct1	0.100432	2.34831	0.092	0.02	1
Lrrc8b	0.100432	1.88077	0.092	0.02	1
Wdr33	0.100436	0.28899	0.398	0.224	1
Ptgr1	0.100453	0.477013	0.133	0.041	1
Ecm1	0.100562	0.320499	0.653	0.49	1
Tmem132c	0.100609	1.88475	0.122	0.041	1
Plscr2	0.100921	1.0474	0.214	0.102	1
Sap30l	0.100972	0.807317	0.469	0.327	1
H2az1	0.101048	-0.682877	0.786	0.776	1
Disp1	0.101144	-1.80859	0.051	0.122	1
Vrk1	0.101144	-2.26374	0.051	0.122	1
Cltb	0.101318	0.462449	0.612	0.51	1
Irf2	0.101518	0.394164	0.408	0.224	1
Rtl8a	0.101518	0.771325	0.388	0.265	1
Rabl6	0.10165	-0.33888	0.245	0.122	1
Plxna1	0.101781	0.962666	0.286	0.163	1
Phtf2	0.102083	0.678647	0.133	0.041	1
Dhrs7b	0.102211	1.05325	0.214	0.102	1
Rprm	0.102292	1.68303	0.122	0.041	1
Mill2	0.102396	1.86806	0.092	0.02	1
Loxl3	0.102577	0.798297	0.276	0.143	1
Hibch	0.102655	1.08783	0.184	0.082	1
Mex3d	0.102708	0.578001	0.163	0.061	1
Cbx3	0.102808	-0.398203	0.724	0.735	1
Kazald1	0.102825	0.389425	0.49	0.327	1
Trim26	0.10294	-1.31229	0.153	0.245	1
Fdx1	0.103011	0.710596	0.541	0.388	1
Zfp809	0.103033	-1.61295	0.051	0.122	1
Rps27a	0.103256	-0.140357	1	0.939	1
Trak2	0.103662	2.02916	0.153	0.061	1
Smim14	0.103686	0.520936	0.765	0.653	1
Junb	0.103814	0.279068	0.888	0.735	1
H2-Aa	0.103892	1.46203	0.061	0	1
Mfap2	0.103917	0.366233	0.837	0.653	1
Dapk3	0.10395	-0.704263	0.265	0.367	1
Tbc1d16	0.103998	1.84266	0.122	0.041	1
Calm1	0.104056	0.123955	0.908	0.898	1
Rpl34	0.104075	-0.168296	0.939	0.918	1
Fance	0.104172	0.947853	0.255	0.143	1
Shisa4	0.104245	-1.07284	0.296	0.388	1
Tmprss6	0.104383	2.09791	0.061	0.02	1
Ciart	0.10439	1.78668	0.092	0.02	1
Sergef	0.10439	1.57462	0.092	0.02	1
Mrpl15	0.104414	-0.666992	0.337	0.429	1
Bphl	0.104531	0.753297	0.388	0.245	1
Vdac1	0.104585	0.442576	0.684	0.51	1
Fzd7	0.104603	1.98708	0.204	0.102	1
1110059E24Rik	0.104618	0.903453	0.265	0.143	1
Fat3	0.104625	-1.37009	0.061	0.143	1
Dennd1b	0.104651	-1.61297	0.082	0.163	1
Tmem184b	0.104769	-1.5672	0.163	0.245	1
Mrps22	0.10495	-3.17102	0.051	0.122	1
Med10	0.105102	0.624929	0.398	0.245	1
Prr3	0.105405	-0.539132	0.071	0.163	1
Bpnt1	0.105474	1.21863	0.184	0.082	1
Atf3	0.105475	1.86888	0.347	0.224	1
Pnpla8	0.105613	0.510261	0.408	0.245	1
Serpine1	0.105619	0.727106	0.194	0.082	1
Spata13	0.105713	0.382221	0.163	0.061	1
Pigq	0.105713	0.643519	0.163	0.061	1
Rap1gap2	0.106287	-1.54986	0.082	0.163	1
Pam	0.106309	0.303378	0.827	0.694	1
Sdcbp	0.106402	0.423836	0.684	0.51	1
Sh3bp4	0.106414	1.43834	0.092	0.02	1
Atp2b2	0.106414	1.36452	0.092	0.02	1
Camkmt	0.106414	1.54972	0.092	0.02	1
Itprip	0.106414	1.52559	0.092	0.02	1
Entpd1	0.106563	0.835942	0.347	0.224	1
Glyr1	0.106575	-1.34314	0.245	0.347	1
Zc3h7b	0.106668	-0.676219	0.316	0.163	1
Ankrd12	0.106781	0.468203	0.653	0.551	1
Pin1	0.106793	0.556132	0.531	0.408	1
Gatad2b	0.106801	0.830204	0.418	0.286	1
Cdpf1	0.106907	0.994583	0.184	0.082	1
Cdc16	0.106924	0.420413	0.357	0.224	1
Clec2d	0.106927	0.580552	0.582	0.429	1
Ripk1	0.10699	0.65828	0.296	0.163	1
Mepce	0.107026	0.467978	0.194	0.082	1
Ift57	0.107215	0.571102	0.367	0.224	1
Nfkb1	0.107247	0.39861	0.337	0.184	1
Stmn3	0.107266	3.50064	0.041	0	1
Ccm2	0.107315	0.672602	0.204	0.102	1
Ints11	0.107477	1.98768	0.122	0.041	1
Rnf103	0.107605	-0.835922	0.296	0.143	1
Ssr1	0.107686	-0.737391	0.52	0.592	1
Pgs1	0.107705	0.4724	0.235	0.122	1
Sh3bp1	0.107943	-1.36543	0.082	0.163	1
Nphp1	0.108015	-1.64911	0.112	0.204	1
Lgals1	0.108353	-0.467201	0.898	0.878	1
Chst1	0.10847	1.25264	0.092	0.02	1
Nup62	0.10847	1.58183	0.092	0.02	1
Wdpcp	0.10847	1.07555	0.092	0.02	1
Epn3	0.10847	1.435	0.092	0.02	1
Pigh	0.10847	1.43932	0.092	0.02	1
Has1	0.10847	1.6698	0.092	0.02	1
Dusp14	0.10847	1.36991	0.082	0.02	1
Mettl2	0.108868	-1.6693	0.051	0.122	1
Ccnd3	0.108912	-1.25161	0.51	0.51	1
Kif1a	0.109251	1.53591	0.122	0.041	1
Kdm3b	0.109251	1.38715	0.122	0.041	1
Anxa5	0.109259	-0.444557	0.898	0.878	1
1600012H06Rik	0.109504	1.41109	0.173	0.082	1
Gmfb	0.109565	0.568332	0.439	0.306	1
Rtl8b	0.10957	0.636656	0.306	0.184	1
Dync1li2	0.10957	0.917111	0.306	0.184	1
Dlgap4	0.109589	0.613854	0.408	0.286	1
Hmcn1	0.109607	0.427574	0.367	0.245	1
Rarres2	0.109644	0.382683	0.847	0.673	1
Nipbl	0.109701	0.454739	0.551	0.367	1
Pappa	0.109818	1.24144	0.184	0.082	1
Fstl5	0.109868	4.57363	0.082	0.041	1
[truncated: 10,097 more rows]

## Sheet: 5 Progenitor - male vs female
Gene	p value	Average log2 fold change	Fraction of cells expressing the gene in male cluster	Fraction of cells expressing the gene in female cluster	Adjusted p value
Eif2s3y	5.68917e-13	5.283	0.622	0	1.24337e-08
Elavl3	5.85282e-07	0.837102	0.878	0.691	0.0127913
Rps10	3.87792e-06	-0.526485	0.98	0.964	0.0847519
Ptprf	1.5453e-05	1.38234	0.786	0.455	0.337726
Eef2	2.03811e-05	0.555903	0.98	0.891	0.44543
Ddx3y	2.17641e-05	3.74073	0.276	0	0.475655
Rpl36al	2.5896e-05	-0.878411	0.888	0.945	0.565956
Tnrc6b	3.67234e-05	1.10769	0.796	0.473	0.80259
Mtmr2	8.79533e-05	2.35465	0.316	0.036	1
Eef1a1	9.35386e-05	0.284384	1	0.982	1
Hspa8	0.000107703	-0.549393	1	1	1
Ran	0.000153579	-0.704205	0.959	0.964	1
Gm2000	0.000155211	-1.05754	0.673	0.818	1
Fxn	0.000183069	-0.97086	0.204	0.509	1
Rps16	0.000220888	-0.351936	0.99	1	1
Tusc3	0.000299491	0.997589	0.684	0.364	1
Syne2	0.000337294	1.361	0.653	0.382	1
Mrpl36	0.000350335	-0.846613	0.622	0.818	1
Arpp19	0.000353786	-0.677881	0.857	0.891	1
Dcx	0.000416136	0.807458	0.735	0.473	1
Stx6	0.000434709	1.82017	0.337	0.073	1
Ccng2	0.000452106	1.29621	0.592	0.364	1
Hint1	0.000458782	-0.40028	0.99	1	1
Acbd5	0.000605045	1.37147	0.592	0.327	1
Plekha1	0.000633562	-1.44341	0.153	0.4	1
Kif5b	0.000673775	0.531929	0.939	0.782	1
Cemip2	0.00069328	0.972177	0.745	0.527	1
Ctnnbip1	0.000812198	0.580486	0.908	0.655	1
Neurl1a	0.000828373	1.21123	0.561	0.327	1
Hsph1	0.000955689	-0.745613	0.133	0.364	1
Tcof1	0.00100372	-1.31067	0.357	0.6	1
Lcorl	0.00101662	0.971707	0.704	0.545	1
Tmed4	0.0010462	0.920627	0.704	0.491	1
Heca	0.00105827	0.998294	0.561	0.273	1
Rpl35a	0.00111258	-0.320102	1	1	1
Arsb	0.00116559	-2.49825	0.031	0.182	1
Tbc1d20	0.00122301	1.1948	0.378	0.127	1
Mex3d	0.00123661	0.986758	0.714	0.491	1
Pef1	0.00128896	1.14527	0.378	0.109	1
Gstp1	0.00131262	1.57591	0.388	0.145	1
Lancl2	0.00131933	1.98195	0.276	0.055	1
Cep78	0.00134145	0.819662	0.684	0.4	1
Zfp113	0.00135314	1.12082	0.418	0.182	1
Rundc3a	0.00136343	1.13471	0.714	0.527	1
Rtn1	0.00137173	0.539471	0.918	0.891	1
H2ac18	0.00138033	-2.84193	0.092	0.273	1
Dnajb12	0.00139583	1.82375	0.337	0.091	1
Sf3b1	0.00146843	0.399714	0.888	0.818	1
Otud5	0.00162673	1.45258	0.327	0.091	1
Ift88	0.00163587	1.51365	0.418	0.164	1
Kdm5d	0.0016528	2.7197	0.163	0	1
Cnot1	0.0016638	-0.991092	0.367	0.6	1
Calb2	0.00170177	1.65248	0.449	0.255	1
Selplg	0.00171568	-2.14974	0.041	0.2	1
Pcp4l1	0.00179079	0.908106	0.582	0.327	1
Rpl30	0.00183379	-0.284839	1	1	1
Clec12a	0.0018726	-3.59093	0.01	0.127	1
Mrto4	0.00191545	-0.994952	0.531	0.709	1
Cnep1r1	0.00197012	0.41085	0.418	0.164	1
Ttc3	0.00201183	0.626011	0.786	0.655	1
Dynlt3	0.00203654	2.12328	0.347	0.127	1
Slc38a6	0.0021162	2.40357	0.194	0.018	1
2310039H08Rik	0.00212131	0.843798	0.582	0.364	1
Mex3c	0.0021437	1.3038	0.531	0.309	1
Ubc	0.00215332	0.442714	0.918	0.855	1
Uqcrb	0.00216288	-0.584344	0.918	0.964	1
Erh	0.00230217	0.522247	0.959	0.855	1
Uty	0.00239733	2.83599	0.153	0	1
Ankrd12	0.00244198	1.00927	0.582	0.345	1
Ralgds	0.00265417	0.915555	0.663	0.4	1
Mmgt2	0.00269725	1.63162	0.367	0.145	1
Arpc4	0.00269899	-0.747016	0.592	0.727	1
Kif3a	0.00271058	0.647213	0.776	0.636	1
Rad17	0.00271946	0.878656	0.704	0.455	1
Abcb10	0.00280362	1.7394	0.224	0.036	1
Tm7sf3	0.00284316	2.48917	0.214	0.036	1
Wdsub1	0.00286979	2.41372	0.265	0.073	1
Ftl1	0.00289162	0.307878	1	0.982	1
Rnf11	0.00289366	0.729758	0.724	0.473	1
Ift57	0.00294176	0.464277	0.643	0.4	1
Ypel3	0.00305136	0.682807	0.867	0.836	1
Cnot7	0.00312032	0.969949	0.653	0.418	1
Tpd52l2	0.00312738	0.697605	0.837	0.655	1
Zfand4	0.00327955	-2.27221	0.031	0.164	1
Rab28	0.00330553	0.815852	0.684	0.473	1
Igf1r	0.00333531	0.661988	0.786	0.655	1
Cdkl2	0.0033987	1.96125	0.214	0.036	1
Wdfy1	0.00340154	1.50108	0.367	0.145	1
Pja2	0.00343417	1.09625	0.408	0.182	1
Prkaa1	0.00346092	2.09308	0.184	0.018	1
Rplp2	0.00347795	-0.384861	1	0.982	1
Ptdss2	0.00347989	0.598642	0.51	0.273	1
Kdm5b	0.00350404	0.671922	0.806	0.618	1
Vsnl1	0.00356445	2.39371	0.235	0.055	1
Trmt1l	0.00356818	1.10351	0.398	0.164	1
Dnajb14	0.00359552	1.57109	0.449	0.236	1
Hyls1	0.00361603	0.843877	0.5	0.255	1
Arid4b	0.00363486	0.547687	0.827	0.618	1
Lamp1	0.00367755	0.776486	0.806	0.673	1
Tbcel	0.00372521	1.3675	0.337	0.127	1
Rnf6	0.0037299	1.16338	0.398	0.164	1
Lrriq1	0.00376663	1.35498	0.276	0.073	1
Apbb1	0.00376827	0.87643	0.755	0.527	1
U2af1	0.00378215	-0.631795	0.939	0.927	1
Baz2a	0.00383644	1.15084	0.5	0.273	1
Zswim1	0.00391767	2.41502	0.173	0.018	1
G6pdx	0.00401313	1.89368	0.265	0.073	1
Ccdc39	0.0040203	1.00254	0.367	0.145	1
Aven	0.00409014	-1.74339	0.061	0.218	1
Smim10l2a	0.00409014	-1.73965	0.061	0.218	1
Naf1	0.00419325	2.58642	0.204	0.036	1
Pbdc1	0.0042032	-0.869064	0.51	0.618	1
Samd14	0.00422752	1.15512	0.439	0.218	1
Dusp28	0.00422976	1.33175	0.347	0.127	1
Gsdmd	0.00425404	-1.47741	0.031	0.164	1
Rab3a	0.00429476	1.25368	0.52	0.291	1
Slc39a6	0.00430074	0.949	0.541	0.291	1
Tgif2	0.00441446	-1.79007	0.041	0.182	1
Edf1	0.0044184	-0.518438	0.918	0.927	1
Fetub	0.00446484	1.56372	0.5	0.273	1
Syt11	0.00446927	0.751966	0.765	0.636	1
Hpcal1	0.0045115	0.479473	0.806	0.545	1
Stk32a	0.0045521	1.27546	0.398	0.182	1
D16Ertd472e	0.00463413	-1.42413	0.051	0.2	1
Tusc2	0.00463509	1.2179	0.418	0.2	1
Ndrg4	0.00464702	1.38463	0.408	0.2	1
Soga3	0.004682	0.740534	0.745	0.564	1
Fam126b	0.00472887	1.66861	0.286	0.091	1
Kctd12	0.00488433	-3.04505	0.01	0.109	1
Alyref	0.00499898	-0.639224	0.888	0.945	1
Gmpr	0.00504088	1.80148	0.337	0.145	1
Pom121	0.00516297	-0.751132	0.347	0.582	1
Nod2	0.00521312	-2.60106	0.01	0.109	1
Arl14ep	0.00523346	1.8204	0.235	0.055	1
Stxbp1	0.00524283	1.16251	0.469	0.236	1
Trrap	0.00524842	0.707166	0.561	0.309	1
Crb3	0.00526618	1.22218	0.439	0.236	1
Sema3f	0.00528373	1.68524	0.276	0.091	1
Dyrk2	0.00530441	1.51653	0.347	0.145	1
Hbp1	0.00531848	0.620498	0.582	0.382	1
Rbm15b	0.00533855	0.615937	0.816	0.655	1
Kctd13	0.0054232	0.966645	0.592	0.4	1
Msi2	0.00542343	0.541613	0.847	0.691	1
Nupr1l	0.00542454	1.34657	0.235	0.055	1
Egln2	0.00542976	0.82072	0.724	0.509	1
Mex3a	0.00548757	0.61527	0.827	0.727	1
Csnk2a2	0.00549085	0.81168	0.602	0.382	1
Npdc1	0.00551612	0.964975	0.622	0.455	1
Rps20	0.00554209	-0.255381	1	0.982	1
Agpat4	0.00555926	0.652877	0.582	0.418	1
Aldh18a1	0.00560329	2.27048	0.163	0.018	1
Cirbp	0.00569948	0.321597	0.949	0.909	1
Btbd2	0.00571354	0.919029	0.429	0.182	1
Gabbr1	0.00572292	1.25536	0.327	0.127	1
Rif1	0.00572785	0.404683	0.653	0.4	1
Elk3	0.00574389	-0.988001	0.01	0.109	1
Triap1	0.00583948	1.07124	0.51	0.309	1
Hopx	0.0058428	1.10692	0.5	0.255	1
Dsp	0.00585579	0.773544	0.408	0.182	1
2810408A11Rik	0.00589245	1.22768	0.316	0.109	1
Sowaha	0.00606114	0.664051	0.735	0.527	1
Trafd1	0.00607017	1.00441	0.469	0.255	1
Lsr	0.00607348	0.589975	0.602	0.4	1
Fbxo21	0.00607916	1.25326	0.388	0.164	1
Abtb1	0.00608207	1.18955	0.367	0.145	1
Natd1	0.00610179	2.0174	0.163	0.018	1
Rdh11	0.00613679	1.33772	0.286	0.091	1
Eif4b	0.00616373	0.954371	0.622	0.4	1
Zc3h7a	0.00616677	1.2064	0.357	0.145	1
Pyurf	0.00617162	-1.30752	0.173	0.364	1
Stk10	0.00620908	-3.6215	0.02	0.127	1
4932438A13Rik	0.00626068	1.16765	0.367	0.145	1
Daxx	0.00633516	1.36544	0.347	0.145	1
Ppil6	0.00636573	2.58703	0.163	0.018	1
Ppia	0.00637033	-0.299848	1	1	1
4930402H24Rik	0.00637631	0.805143	0.49	0.255	1
Purb	0.00642898	0.60446	0.735	0.527	1
Ro60	0.00643945	1.23028	0.49	0.273	1
Trak1	0.0064429	1.55065	0.255	0.073	1
Scg3	0.00650802	1.6194	0.429	0.255	1
Scn9a	0.006601	0.85455	0.469	0.255	1
S100a4	0.00662483	-1.82261	0.092	0.255	1
Miga2	0.0066399	2.02915	0.163	0.018	1
Ehd3	0.0066399	2.02051	0.163	0.018	1
Oas2	0.0067576	-2.1334	0.02	0.127	1
5730455P16Rik	0.00677581	1.24442	0.255	0.073	1
Plcxd3	0.00685669	0.42251	0.337	0.127	1
Prcp	0.00690916	-1.78145	0.071	0.218	1
Phip	0.00698642	0.598105	0.867	0.673	1
Fgd2	0.00704223	1.45627	0.459	0.291	1
Rasgrp1	0.00716098	-3.18001	0	0.073	1
Relt	0.00716098	-3.36818	0	0.073	1
S1pr4	0.00716098	-3.23891	0	0.073	1
Emid1	0.00716098	-3.11159	0	0.073	1
Mocs1	0.00716098	-5.06204	0	0.073	1
Zfp521	0.00716098	-2.6568	0	0.073	1
Ifit3	0.00716098	-2.98987	0	0.073	1
A430033K04Rik	0.00720092	2.35902	0.122	0	1
BC024978	0.00720092	3.06091	0.122	0	1
Cul3	0.00732529	0.871214	0.663	0.436	1
Rasal2	0.00736687	0.843283	0.48	0.291	1
Rmc1	0.00745265	2.0107	0.194	0.036	1
B3galnt2	0.00752723	1.76512	0.163	0.018	1
Trpc2	0.00767157	1.65768	0.276	0.091	1
Ttc5	0.00788422	0.435699	0.694	0.509	1
Dynlrb2	0.00796781	0.614341	0.684	0.455	1
Rpl19	0.0080007	-0.245721	1	1	1
Scamp1	0.00801997	1.40743	0.296	0.109	1
Tmprss6	0.00802399	0.652787	0.612	0.382	1
2610002M06Rik	0.00803206	1.20293	0.378	0.164	1
Syt1	0.00803585	0.984802	0.561	0.4	1
H2az1	0.00809126	-0.460414	0.99	1	1
Gskip	0.00810418	1.15357	0.347	0.145	1
Dctpp1	0.0081078	-0.90566	0.561	0.691	1
Tmsb4x	0.00818272	-0.26304	1	1	1
Igsf8	0.0082772	0.870894	0.745	0.527	1
Msl3l2	0.00832657	2.17468	0.184	0.036	1
Sccpdh	0.00835733	-1.15338	0.173	0.364	1
Plekhm1	0.00836434	1.28799	0.224	0.055	1
Zfp281	0.00838654	1.6105	0.245	0.073	1
Seh1l	0.00847316	-0.995451	0.286	0.491	1
Nup88	0.00847832	0.800546	0.602	0.364	1
Mat2b	0.00848934	0.51427	0.735	0.527	1
Dctn2	0.00849862	0.447293	0.847	0.764	1
Ncam1	0.00849964	0.618141	0.847	0.709	1
2900026A02Rik	0.00852695	-2.41076	0.122	0.291	1
Uchl1	0.00853196	0.542811	0.908	0.764	1
Slc22a17	0.00857283	1.17027	0.408	0.218	1
Mapk3	0.00863068	0.893674	0.571	0.418	1
Bbof1	0.00867439	1.48573	0.306	0.127	1
Wipf2	0.00868485	1.13622	0.327	0.127	1
Agfg1	0.00869667	-1.15929	0.286	0.491	1
Trim66	0.00870259	1.1341	0.327	0.145	1
Lsm3	0.00876392	-0.652569	0.776	0.836	1
Elmod2	0.00887972	2.228	0.153	0.018	1
Fiz1	0.00891224	1.08372	0.418	0.218	1
Gas8	0.00897467	0.48656	0.592	0.364	1
Bsg	0.00899255	0.439896	0.898	0.855	1
Ube3a	0.00915449	0.860768	0.653	0.582	1
Fam131a	0.00920473	1.31942	0.327	0.127	1
Impa1	0.00920477	-1.29499	0.245	0.436	1
Elof1	0.00921172	0.436245	0.918	0.855	1
Usp6nl	0.00927795	-1.42254	0.071	0.218	1
Ap1m1	0.009307	0.981097	0.357	0.164	1
Tbc1d10b	0.00940741	1.16944	0.378	0.182	1
Efna5	0.00955061	0.81714	0.48	0.255	1
Pdcd7	0.009561	0.932387	0.276	0.091	1
Sgcb	0.00956642	-1.23007	0.143	0.309	1
Zfp322a	0.00971991	2.03288	0.327	0.145	1
Nelfcd	0.00973738	0.697087	0.724	0.473	1
Nsd3	0.00978132	0.641739	0.714	0.509	1
Gpam	0.00985559	2.32438	0.153	0.018	1
Tspan13	0.00990306	0.598949	0.673	0.473	1
Mgat4b	0.0100788	0.868964	0.5	0.273	1
Snx24	0.0102276	-1.53459	0.061	0.2	1
Akr1a1	0.0103065	0.54737	0.939	0.873	1
Csnk1a1	0.0103429	0.534106	0.949	0.8	1
Slc4a11	0.0103462	2.12661	0.112	0	1
Ppm1e	0.0103462	2.42554	0.112	0	1
Slc52a2	0.0103462	2.68754	0.112	0	1
Dcdc2a	0.0103462	3.18253	0.102	0	1
Tagap1	0.010486	1.88916	0.153	0.018	1
Sp8	0.0105441	0.413141	0.714	0.545	1
Mtcl1	0.010689	1.08955	0.418	0.218	1
Atxn1	0.0107039	1.36233	0.153	0.018	1
Mtif2	0.0108274	1.15062	0.357	0.164	1
Gak	0.0108538	1.28845	0.398	0.2	1
Dlx5	0.0109034	0.651051	0.857	0.709	1
Tmem230	0.0109299	0.905112	0.592	0.418	1
Coq4	0.0109993	1.27004	0.398	0.218	1
Letm2	0.011	1.06907	0.296	0.109	1
Brsk1	0.0110424	1.27256	0.327	0.145	1
Ndc1	0.0110776	1.27214	0.245	0.073	1
Epc2	0.0110804	0.885774	0.571	0.4	1
Trappc6b	0.011205	0.472694	0.806	0.636	1
Tnfaip1	0.0112382	0.980866	0.5	0.291	1
Ing1	0.0113371	1.18719	0.52	0.345	1
Pde1a	0.0113429	1.07589	0.214	0.055	1
Clcn4	0.0114242	0.852409	0.592	0.382	1
Camk2n1	0.0114292	0.595589	0.816	0.636	1
Dapk3	0.0114432	0.895979	0.49	0.309	1
Zfp821	0.0114615	0.849368	0.561	0.345	1
Ccpg1os	0.0114751	0.81274	0.541	0.345	1
Tsen54	0.0115387	1.36195	0.214	0.055	1
Sult4a1	0.0115424	0.794187	0.561	0.327	1
Ctdsp2	0.0116582	0.925763	0.408	0.2	1
Sema3a	0.0117347	1.0207	0.49	0.273	1
Rnasel	0.01184	0.70186	0.418	0.218	1
Mzt2	0.0119062	-1.17398	0.224	0.4	1
Ccni	0.0120317	0.6251	0.806	0.709	1
Ebf1	0.012033	0.41893	0.918	0.8	1
Brd3	0.0120593	0.664102	0.827	0.745	1
Sox5	0.0120632	1.87512	0.245	0.091	1
Fstl5	0.012068	1.06009	0.673	0.509	1
Scamp5	0.012103	2.07785	0.143	0.018	1
Atp11a	0.0123497	1.36179	0.327	0.145	1
Fam160a2	0.0124297	1.31348	0.388	0.2	1
Gmnn	0.0124597	-1.32571	0.408	0.582	1
Samd1	0.0124773	-1.07369	0.061	0.2	1
Rpsa	0.012555	-0.196349	1	0.982	1
Steap2	0.0126174	2.1354	0.143	0.018	1
Dusp26	0.0127969	2.71201	0.194	0.036	1
Otud4	0.0128109	0.92546	0.408	0.218	1
Cpsf3	0.0128424	0.882954	0.347	0.145	1
Cdyl2	0.0128654	1.02945	0.51	0.327	1
Eef1d	0.0128918	-0.868708	0.724	0.8	1
Rps14	0.0129645	-0.25227	1	1	1
Zfp688	0.0130321	1.1637	0.306	0.127	1
Mtln	0.0130382	1.48864	0.296	0.127	1
Ermard	0.0130583	1.72371	0.173	0.036	1
Rassf5	0.0130766	-2.7657	0.01	0.091	1
Fam135a	0.0131624	1.3781	0.286	0.109	1
Erich3	0.0133035	1.88382	0.173	0.036	1
Usp15	0.0133037	0.83011	0.5	0.273	1
Cldn6	0.0133805	1.50648	0.276	0.109	1
Tuba1a	0.0133847	0.399752	0.98	0.909	1
Mbd5	0.0134253	2.27794	0.143	0.018	1
Aamp	0.0135088	0.569324	0.745	0.527	1
Kifap3	0.0139319	0.468271	0.786	0.582	1
Rps15a	0.0139664	-0.223706	1	1	1
Hs6st1	0.0140273	0.815887	0.643	0.473	1
Samd4b	0.0140295	0.86286	0.551	0.4	1
Rpl18	0.0141149	-0.274528	1	0.982	1
Timm44	0.0141824	-1.04665	0.235	0.436	1
Frmd5	0.0142071	2.18631	0.194	0.055	1
Rab3b	0.0142088	1.36784	0.408	0.236	1
Itgax	0.0143748	-2.47578	0.01	0.091	1
Traf3ip2	0.0143748	-2.25889	0.01	0.091	1
Ago1	0.0144121	0.975192	0.459	0.255	1
Syt5	0.0144247	0.617642	0.602	0.4	1
Amer2	0.0144751	0.553052	0.561	0.364	1
Eif3h	0.0144855	0.245694	0.969	0.909	1
Rpl39	0.014569	-0.257376	1	1	1
Znfx1	0.0145918	1.91916	0.173	0.036	1
Pex14	0.0146156	1.18405	0.276	0.109	1
Tia1	0.0146161	0.615381	0.806	0.691	1
Gga1	0.0147494	1.03266	0.398	0.218	1
Rab6b	0.0147685	0.582302	0.714	0.564	1
Fbxl15	0.014796	1.54362	0.306	0.127	1
Ptpn7	0.0148322	-2.16003	0.01	0.091	1
Sh2d1b1	0.0148322	-2.38425	0.01	0.091	1
Pigg	0.0148444	1.83467	0.102	0	1
4930563E22Rik	0.0148444	1.86071	0.102	0	1
Dcc	0.0148444	2.66024	0.102	0	1
Dmtn	0.0148738	1.71252	0.143	0.018	1
Fau	0.0148789	-0.236814	1	1	1
Atf5	0.0148843	0.673446	0.837	0.727	1
Smarcc2	0.0149151	0.770848	0.673	0.545	1
Bckdk	0.0150173	1.05916	0.357	0.182	1
Cfap36	0.0150767	0.634762	0.735	0.636	1
Cd3eap	0.0151592	-1.68055	0.163	0.309	1
Edc3	0.0152108	1.26435	0.255	0.091	1
Pex6	0.0152108	1.43845	0.255	0.091	1
Mms19	0.0152464	1.35524	0.296	0.127	1
Vmn1r71	0.0152992	5.20225	0.01	0.036	1
Chp1	0.0153055	0.675006	0.429	0.2	1
Capn1	0.0153578	0.919897	0.214	0.055	1
Fam45a	0.0154165	1.63149	0.173	0.036	1
Mtss2	0.0155825	1.45231	0.204	0.055	1
Stx7	0.015601	0.752208	0.663	0.491	1
Jund	0.0156773	0.390885	0.99	0.927	1
Rgs19	0.0156997	-1.40226	0.071	0.2	1
Sec23b	0.0157001	0.983003	0.398	0.218	1
Kdsr	0.0157205	1.16885	0.276	0.109	1
Cacna2d1	0.015731	1.05238	0.398	0.2	1
Zfp553	0.0157369	0.872578	0.5	0.327	1
Uri1	0.0157765	1.06196	0.52	0.364	1
E130309D02Rik	0.0158444	0.715068	0.388	0.2	1
Polg	0.0158463	1.61724	0.204	0.055	1
Abhd12	0.0158872	1.01772	0.459	0.273	1
Thrap3	0.015903	0.51394	0.847	0.709	1
Etfrf1	0.016018	0.882297	0.327	0.145	1
Apoe	0.0160206	-2.6824	0.041	0.036	1
Sec22b	0.0160554	1.06088	0.48	0.309	1
Atp5g1	0.0160677	-0.731429	0.908	0.945	1
Sergef	0.0161786	-1.48981	0.082	0.218	1
Dact3	0.0162819	1.41054	0.173	0.036	1
Pip4p1	0.0162837	0.432304	0.653	0.382	1
Rps13	0.0163461	-0.187697	1	1	1
Elf4	0.0163924	-2.63167	0.02	0.109	1
Cebpg	0.0163942	0.378595	0.888	0.764	1
Spg7	0.0163954	0.785761	0.5	0.291	1
Uchl5	0.0164323	-0.777799	0.357	0.527	1
Cdk9	0.0164454	0.533806	0.643	0.491	1
Lrrc20	0.0164935	1.943	0.214	0.073	1
Fbxl19	0.0165001	1.28716	0.235	0.073	1
Os9	0.0165126	0.85966	0.52	0.327	1
1700088E04Rik	0.0165365	0.899905	0.398	0.2	1
Thsd7b	0.0165654	0.616384	0.592	0.382	1
Insr	0.0165794	1.67711	0.194	0.055	1
Map1b	0.0166671	0.440851	0.939	0.818	1
Eif1ad	0.0168214	-0.61167	0.459	0.673	1
Dlgap4	0.0168312	0.792865	0.582	0.382	1
Fance	0.0170128	0.867304	0.357	0.164	1
Nova2	0.0170553	1.26021	0.224	0.073	1
Prune2	0.0170822	1.39933	0.388	0.2	1
Lrrc73	0.0171628	2.32085	0.133	0.018	1
Uqcr10	0.0172117	-0.314275	0.98	0.927	1
Gm42372	0.0172343	1.44437	0.347	0.182	1
Braf	0.0173115	0.855823	0.5	0.309	1
4833439L19Rik	0.0173518	0.584648	0.663	0.455	1
H2bc21	0.0174708	0.415807	0.337	0.164	1
Sf3b6	0.0174755	-0.490958	0.949	0.945	1
Luc7l	0.0175042	-0.804238	0.592	0.782	1
Phf11b	0.0175952	-2.93276	0.031	0.127	1
Ubr4	0.017656	1.42695	0.388	0.236	1
Phf20l1	0.017667	0.548622	0.694	0.527	1
Rgs1	0.0177645	-3.39082	0.02	0.109	1
Runx3	0.0177645	-2.97399	0.02	0.109	1
Gngt2	0.0177645	-2.86182	0.02	0.109	1
Sgf29	0.0178133	0.720352	0.367	0.182	1
Scrn3	0.0178846	2.00503	0.133	0.018	1
Gm20696	0.0178846	1.8487	0.133	0.018	1
Lonrf1	0.0178846	2.49064	0.133	0.018	1
Slc30a5	0.0178954	1.33769	0.276	0.109	1
Fam114a2	0.0179279	0.639004	0.694	0.455	1
Sri	0.0179887	-1.65579	0.235	0.4	1
Fam76a	0.0180189	0.628599	0.49	0.291	1
Map3k7	0.018068	1.06514	0.327	0.145	1
Cenpq	0.0181184	-0.827769	0.367	0.545	1
Prmt1	0.0181513	-0.560277	0.888	0.909	1
Zwint	0.0181876	0.468307	0.643	0.473	1
Snrnp35	0.0182058	1.0207	0.306	0.127	1
Trim39	0.0182094	1.70999	0.265	0.109	1
Stox2	0.0182525	0.997264	0.5	0.327	1
Rars	0.0182536	0.631825	0.561	0.345	1
Rpl12	0.018309	-0.300184	0.969	0.964	1
Gga2	0.0183161	1.28016	0.286	0.109	1
Mbd6	0.0183421	0.765168	0.439	0.236	1
Pacsin2	0.0183965	-0.76461	0.214	0.382	1
Llgl2	0.0184501	1.86734	0.224	0.073	1
Stk16	0.0185755	0.577209	0.561	0.418	1
Rbks	0.0186329	2.27755	0.133	0.018	1
Brd1	0.0186507	0.799528	0.694	0.509	1
Ptms	0.018684	0.31992	0.939	0.982	1
Herc6	0.0187343	-2.73514	0.02	0.109	1
Tln2	0.0187343	-0.815474	0.02	0.109	1
Ms4a6b	0.0187343	-1.60311	0.02	0.109	1
Ppp2r5b	0.0187852	1.3247	0.296	0.127	1
Camk2a	0.0188813	1.77062	0.163	0.036	1
Ccnj	0.0188813	1.71627	0.163	0.036	1
Enah	0.018959	0.41917	0.735	0.6	1
Mcu	0.0189733	1.42257	0.194	0.055	1
D1Ertd622e	0.0189741	0.769249	0.367	0.182	1
Mlxipl	0.0190173	-2.32686	0.051	0.164	1
Cox5b	0.0190746	-0.300422	0.98	0.982	1
Aldh1b1	0.0192363	-1.93678	0.02	0.109	1
Itgb7	0.0192363	-2.77809	0.02	0.109	1
Fsip1	0.0192929	1.45254	0.194	0.055	1
Ubash3b	0.0193598	-2.01853	0.031	0.127	1
Srpk2	0.0193962	0.661292	0.786	0.709	1
Rpl35	0.0194674	0.217629	1	1	1
Cast	0.0196564	-1.33677	0.112	0.255	1
Wdr83os	0.0197238	-0.497351	0.694	0.855	1
Aktip	0.0197488	0.789339	0.418	0.236	1
Sdk1	0.0198088	0.960637	0.622	0.436	1
Usf1	0.0198088	0.882328	0.622	0.455	1
Hcls1	0.0198244	-2.42683	0.031	0.127	1
Slc25a33	0.0198475	0.682341	0.633	0.455	1
Rpgr	0.0200034	1.51483	0.337	0.182	1
Dennd1c	0.0200073	-1.79464	0.082	0.2	1
Phf1	0.0200202	1.5609	0.235	0.091	1
Ccdc22	0.0201316	1.3425	0.347	0.164	1
Zfp90	0.0202099	0.850297	0.378	0.2	1
Rps11	0.0202735	-0.205341	1	1	1
As3mt	0.0202799	1.3842	0.194	0.055	1
Fam71e1	0.0203039	1.23901	0.163	0.036	1
Fam160b1	0.0203297	1.031	0.276	0.109	1
Il18rap	0.0203769	-2.97985	0	0.055	1
Slamf9	0.0203769	-3.34313	0	0.055	1
G0s2	0.0203769	-1.63888	0	0.055	1
Gpr155	0.0203769	-2.59386	0	0.055	1
Stard9	0.0203769	-2.39736	0	0.055	1
Cst7	0.0203769	-2.71857	0	0.055	1
Fam209	0.0203769	-2.61824	0	0.055	1
Muc1	0.0203769	-2.09416	0	0.055	1
Evc2	0.0203769	-2.31988	0	0.055	1
Oas1g	0.0203769	-2.38153	0	0.055	1
Card11	0.0203769	-2.81866	0	0.055	1
Slc2a3	0.0203769	-2.24512	0	0.055	1
Spon1	0.0203769	-3.8159	0	0.055	1
Tnfrsf23	0.0203769	-2.40884	0	0.055	1
Ltb4r1	0.0203769	-4.14847	0	0.055	1
Ccdc69	0.0203769	-2.25034	0	0.055	1
Wfdc17	0.0203769	-4.31044	0	0.055	1
Adam11	0.0203769	-2.5803	0	0.055	1
Sstr2	0.0203769	-2.1909	0	0.055	1
Actn2	0.0203769	-4.1286	0	0.055	1
Tifab	0.0203769	-2.9944	0	0.055	1
Hdac9	0.0203769	-2.37079	0	0.055	1
Smoc2	0.0203769	-2.52919	0	0.055	1
Ovol1	0.0203769	-2.10448	0	0.055	1
Csf1r	0.0203769	-2.99434	0	0.036	1
Irf2bpl	0.0205214	0.536846	0.776	0.618	1
Slc27a1	0.0206185	1.44779	0.194	0.055	1
Tsc22d1	0.0206192	0.731716	0.755	0.673	1
Heatr6	0.02064	1.08252	0.449	0.273	1
Rbm48	0.0206541	0.909532	0.327	0.164	1
Wdr92	0.02077	-0.162145	0.286	0.109	1
Sh3bp1	0.020783	-1.75297	0.031	0.127	1
Smarca4	0.0208608	0.544587	0.898	0.745	1
Rbm38	0.0209334	-1.05031	0.235	0.4	1
Sh3yl1	0.0209484	1.00837	0.316	0.145	1
Cnn3	0.0210436	0.558328	0.776	0.636	1
Mreg	0.0210596	0.778296	0.286	0.109	1
Bace1	0.0211178	1.29476	0.449	0.309	1
Tsc2	0.0211209	0.938985	0.52	0.327	1
Mturn	0.0211312	0.966324	0.388	0.218	1
Nbr1	0.0211552	0.782329	0.531	0.364	1
Zhx1	0.0211834	0.865498	0.347	0.164	1
Cfap65	0.0212803	2.27158	0.092	0	1
Gtdc1	0.0212803	1.88226	0.092	0	1
Fbxl4	0.0212803	1.94453	0.092	0	1
St3gal3	0.0212803	2.89733	0.092	0	1
Urb2	0.0212803	1.62061	0.092	0	1
Ccdc13	0.0212803	2.20959	0.092	0	1
Gpatch2l	0.0212803	2.1254	0.092	0	1
Trpm3	0.0212803	1.82804	0.092	0	1
Cdh2	0.0213764	0.63541	0.765	0.6	1
Mtrf1l	0.0213972	-2.09986	0.092	0.218	1
Pheta1	0.0215059	1.13524	0.316	0.145	1
Uvrag	0.0215469	0.720863	0.306	0.145	1
Dscaml1	0.0215784	0.388299	0.388	0.2	1
Gatd1	0.0216101	0.79668	0.449	0.273	1
Acsl6	0.0216356	1.22115	0.367	0.2	1
Cryl1	0.0217592	-2.15253	0.092	0.218	1
Fam126a	0.0217816	-1.96636	0.031	0.127	1
Bcl2a1b	0.0217816	-2.21829	0.031	0.127	1
Zfp646	0.0219485	0.950186	0.357	0.164	1
Tent4a	0.0220293	1.06328	0.327	0.164	1
Ubl7	0.0221908	0.845123	0.49	0.345	1
Id4	0.0224396	0.638046	0.714	0.564	1
Tprgl	0.0225848	0.391995	0.827	0.636	1
Cul9	0.022613	1.47963	0.163	0.036	1
Kif5c	0.0226175	0.582228	0.806	0.655	1
Rps17	0.0226414	-0.220031	0.98	0.982	1
Syt7	0.022731	0.635137	0.265	0.109	1
Sdr39u1	0.0228078	1.30515	0.306	0.164	1
Ccdc91	0.0228605	1.22109	0.265	0.109	1
Zfp532	0.0228863	1.40462	0.327	0.182	1
Ddx39	0.0229029	-1.02741	0.592	0.709	1
Kdm5a	0.0229126	0.661271	0.643	0.473	1
Adgrb2	0.0230192	-1.9537	0.082	0.2	1
Mbd2	0.0231501	0.349789	0.908	0.782	1
Glmp	0.0234725	1.35213	0.245	0.091	1
Cmtm4	0.0236106	0.740461	0.49	0.291	1
Siva1	0.0236581	-0.615194	0.582	0.709	1
Rrbp1	0.0237694	0.547001	0.571	0.4	1
Rps8	0.0237956	-0.225	1	1	1
Stx1a	0.0240186	0.465058	0.582	0.364	1
Flywch2	0.0242134	0.28353	0.673	0.509	1
Zbtb2	0.0242859	1.83357	0.122	0.018	1
Ywhag	0.0243545	0.358873	0.827	0.545	1
Oscp1	0.0244563	0.447974	0.561	0.345	1
Tdg	0.024461	0.673775	0.673	0.509	1
Sh2b3	0.0244629	-0.78525	0.031	0.127	1
Zfp647	0.0244727	1.98968	0.204	0.073	1
Pten	0.0244987	0.411331	0.653	0.455	1
Crmp1	0.0246024	0.461017	0.776	0.545	1
Prmt7	0.0246087	0.783801	0.296	0.127	1
Arhgef28	0.0246233	1.30837	0.255	0.109	1
Mettl1	0.0247062	1.09188	0.327	0.164	1
Gng3	0.0247404	1.73987	0.337	0.2	1
Gtf3c2	0.0247535	1.1275	0.48	0.291	1
BC031181	0.0248617	0.388542	0.898	0.836	1
Map3k2	0.02487	1.01428	0.245	0.091	1
Rpl22	0.0250001	-0.242194	1	0.982	1
Mylpf	0.025147	1.06337	0.163	0.036	1
Uba52	0.0251474	0.347619	0.918	0.836	1
Prpf31	0.0252242	-1.10044	0.367	0.509	1
Anp32a	0.0252527	-0.392165	0.867	0.909	1
Nhs	0.0252703	0.371022	0.673	0.436	1
Gsk3b	0.025307	0.460858	0.908	0.782	1
Zfp267	0.0253682	1.37877	0.235	0.091	1
Tomm40	0.0254101	0.296705	0.735	0.564	1
Tbc1d10a	0.0254669	0.413377	0.459	0.255	1
Cryzl2	0.0254723	1.78854	0.184	0.055	1
Saraf	0.0256724	0.640144	0.867	0.727	1
Cyfip2	0.0257322	0.546146	0.673	0.509	1
Serf2	0.0257434	-0.432062	0.959	0.964	1
1700003E16Rik	0.0257443	2.52461	0.153	0.036	1
Lsm5	0.0257538	-0.45039	0.888	0.873	1
Rnf182	0.0257923	0.422804	0.633	0.4	1
Mfap1b	0.025799	0.642891	0.378	0.182	1
Clmp	0.0258504	0.681473	0.582	0.382	1
Mysm1	0.0258749	0.329734	0.449	0.236	1
Cycs	0.0259656	-0.353485	0.918	0.927	1
C1qtnf4	0.0259835	1.11186	0.327	0.164	1
Rbfox2	0.026124	0.402579	0.714	0.491	1
Mettl27	0.0263424	2.40017	0.122	0.018	1
Tafa5	0.0263424	1.93974	0.122	0.018	1
Zfp51	0.0263424	1.75236	0.122	0.018	1
Gpx2	0.0263466	0.38985	0.898	0.8	1
Nr4a2	0.0263761	-1.46335	0.112	0.255	1
Cntn4	0.0264346	0.539964	0.52	0.327	1
Rab10	0.0264698	0.426157	0.806	0.764	1
Rxrb	0.0266322	0.841618	0.439	0.273	1
Tox4	0.0266674	0.63746	0.561	0.382	1
Zfp148	0.0266941	-0.22527	0.52	0.309	1
Snapc1	0.0266994	1.15109	0.48	0.345	1
Arhgap44	0.0267536	1.73573	0.184	0.055	1
Helq	0.026779	1.31719	0.214	0.073	1
Adprhl2	0.026787	0.685219	0.306	0.127	1
Elmod3	0.0267895	-0.22345	0.316	0.145	1
Eif3j1	0.0268533	-0.911268	0.551	0.673	1
Lhfpl4	0.0268575	1.60627	0.204	0.073	1
Gstm4	0.0268795	2.02306	0.122	0.018	1
Rps27a	0.0270369	-0.204627	1	1	1
Zfp523	0.0271157	0.988419	0.388	0.218	1
Zfp710	0.0271498	1.07488	0.286	0.127	1
Rab33b	0.0271649	1.76332	0.153	0.036	1
Pafah1b2	0.0272623	0.502915	0.643	0.509	1
Lgals1	0.0276957	-2.76242	0.112	0.236	1
Jakmip2	0.0278016	0.863908	0.429	0.255	1
Rps29	0.0278369	-0.176425	1	1	1
Amigo1	0.027982	1.53759	0.122	0.018	1
Fcgbp	0.027982	1.86892	0.122	0.018	1
Srrm3	0.0280282	0.538703	0.296	0.145	1
Atxn2l	0.0282766	0.603089	0.776	0.582	1
Rpl18a	0.0283815	-0.265413	1	1	1
Cenps	0.0284324	-1.01951	0.173	0.327	1
Ophn1	0.0284446	1.13652	0.214	0.073	1
Rbm25	0.0286267	0.351497	0.898	0.745	1
Got2	0.0287043	0.707442	0.612	0.455	1
Slc25a11	0.028793	0.44698	0.714	0.509	1
Snrpg	0.0287957	-0.191761	0.99	0.982	1
Akt2	0.028901	1.087	0.265	0.109	1
Vezt	0.0289788	1.24374	0.367	0.218	1
Dnal1	0.0290127	1.41641	0.184	0.055	1
Pdcd4	0.0290759	0.471432	0.429	0.255	1
St6galnac2	0.0291235	1.08904	0.347	0.182	1
Dok5	0.0291639	1.42659	0.153	0.036	1
Fam120b	0.0291825	0.489179	0.296	0.127	1
Nf2	0.0291825	1.53223	0.286	0.145	1
Wsb2	0.0291869	0.721763	0.52	0.327	1
Fam122a	0.0293812	0.864795	0.449	0.291	1
Ttll5	0.0294402	1.41764	0.204	0.073	1
Slc44a1	0.0294587	0.819156	0.367	0.182	1
Ap3d1	0.0295181	0.785733	0.429	0.236	1
Cript	0.0295254	0.407288	0.847	0.8	1
Rps4x	0.0296402	-0.212712	0.99	0.982	1
Map9	0.0296922	0.737401	0.612	0.4	1
Ube2e2	0.0297317	0.861211	0.429	0.255	1
Copb2	0.0297468	0.701115	0.776	0.673	1
Vta1	0.0298762	0.490153	0.704	0.509	1
Zfp618	0.0299613	1.23138	0.184	0.055	1
Cog6	0.0301586	1.10122	0.337	0.182	1
Wrb	0.0301986	0.951391	0.214	0.073	1
Myt1	0.0302037	1.33233	0.316	0.164	1
Prkar1a	0.030266	0.318282	0.918	0.855	1
Pdk1	0.0303044	1.16938	0.122	0.018	1
Kcnb1	0.0303044	1.32398	0.122	0.018	1
Gnptg	0.0303632	0.319251	0.408	0.236	1
Pms1	0.0305025	2.04763	0.082	0	1
Zfp661	0.0305025	1.55732	0.082	0	1
2610528J11Rik	0.0305025	1.7537	0.082	0	1
Idua	0.0305025	1.88275	0.082	0	1
Hpn	0.0305025	1.23616	0.082	0	1
Fam57b	0.0305025	1.94034	0.082	0	1
Pcsk4	0.0305025	1.48364	0.082	0	1
Btd	0.0305025	2.13321	0.082	0	1
Mmrn2	0.0305025	2.06467	0.082	0	1
Acad11	0.0305025	2.53861	0.082	0	1
Inca1	0.0305025	2.13708	0.082	0	1
Arsa	0.0305025	1.20935	0.082	0	1
Pdlim2	0.0305806	1.27102	0.316	0.164	1
Dnajc13	0.0305838	1.17163	0.235	0.091	1
Kat6b	0.0306277	0.7033	0.418	0.236	1
Kalrn	0.0307247	0.911912	0.255	0.109	1
Map3k12	0.0307256	1.39779	0.276	0.127	1
Rcan1	0.0309141	0.973899	0.327	0.164	1
Fam89a	0.0309727	0.792085	0.418	0.236	1
Ramac	0.0310244	0.320515	0.857	0.745	1
Sox11	0.0311797	0.350366	0.939	0.855	1
Rps12	0.031244	-0.313759	1	1	1
Prmt2	0.031338	0.922472	0.49	0.327	1
Zfp668	0.0314629	1.1846	0.235	0.091	1
Dedd2	0.0315291	1.42702	0.286	0.145	1
Hip1r	0.0315743	0.918223	0.214	0.073	1
Cox16	0.0316425	-0.653816	0.143	0.273	1
Ube2b	0.0316821	0.320566	0.969	0.909	1
Zfp462	0.0317662	1.14755	0.286	0.127	1
Rab11fip1	0.0318395	1.14469	0.153	0.036	1
Flot1	0.0319944	1.07989	0.357	0.2	1
Aspscr1	0.0320496	1.14366	0.449	0.291	1
Zc2hc1a	0.0321043	0.417795	0.663	0.491	1
Fam199x	0.0322338	1.25187	0.204	0.073	1
Nsmf	0.0322991	0.535501	0.418	0.218	1
Nsrp1	0.0324143	0.720049	0.612	0.473	1
Zfp1	0.0324389	0.807704	0.255	0.109	1
Jup	0.0326726	0.41718	0.735	0.564	1
Dpp3	0.0326958	0.523666	0.602	0.364	1
Sh2d3c	0.0327509	0.818367	0.316	0.145	1
Rad54l2	0.0328451	0.863077	0.408	0.236	1
Krt8	0.032851	0.426321	0.888	0.764	1
Spin1	0.0328671	0.547595	0.755	0.6	1
Rnf8	0.0329269	0.648132	0.724	0.564	1
Htra2	0.032959	1.2264	0.265	0.127	1
Gpt2	0.0329672	-1.29683	0.071	0.182	1
Mrps18b	0.0331511	0.543682	0.337	0.164	1
Chchd7	0.0332135	0.770247	0.408	0.236	1
Ahi1	0.0333023	0.496975	0.622	0.418	1
Abca3	0.0333263	1.21666	0.255	0.109	1
Sdhaf3	0.0333371	1.00527	0.388	0.236	1
Rrp12	0.0333371	1.12884	0.388	0.236	1
Usp3	0.0333873	0.348109	0.663	0.491	1
Epn2	0.0335013	1.10081	0.296	0.145	1
Cd52	0.0335081	-2.57477	0.051	0.164	1
Lypla2	0.0335254	0.85718	0.398	0.218	1
Ivd	0.033535	1.44457	0.245	0.109	1
2700062C07Rik	0.033577	0.407741	0.439	0.255	1
Acaa2	0.0336026	0.521499	0.643	0.473	1
Banp	0.0336632	-0.786785	0.173	0.327	1
Serpini1	0.034122	0.568815	0.398	0.2	1
Rffl	0.034122	0.402675	0.388	0.218	1
Ankrd54	0.0342303	0.787102	0.418	0.236	1
Cox7c	0.0343507	-0.235319	1	0.964	1
Abhd8	0.0343721	0.509832	0.531	0.364	1
Leng8	0.0344171	0.410187	0.837	0.691	1
Plekha5	0.0344239	1.00906	0.398	0.236	1
Rps19	0.0346756	-0.168726	1	1	1
Rrs1	0.0347192	-0.299526	0.347	0.509	1
Tnk2	0.0347229	0.79095	0.153	0.036	1
Dnmt1	0.0347644	-0.803726	0.531	0.691	1
Ing4	0.0348135	0.852095	0.551	0.4	1
Pink1	0.0348414	0.949675	0.5	0.364	1
Jak1	0.0348417	1.02748	0.663	0.509	1
Cep290	0.0349383	0.730194	0.51	0.364	1
Kcns3	0.0350025	1.95823	0.112	0.018	1
Rpl26	0.0350029	-0.172294	1	1	1
Nrxn1	0.0351645	0.469825	0.684	0.527	1
Tpd52	0.0352285	0.334257	0.929	0.818	1
Psen2	0.0352973	0.479967	0.459	0.273	1
Cds2	0.0354066	1.35055	0.245	0.109	1
Rgs20	0.0354206	0.546286	0.449	0.255	1
Anapc11	0.0354668	-0.4856	0.694	0.836	1
Stx2	0.0354999	0.487457	0.51	0.309	1
D930020B18Rik	0.0355227	0.389557	0.663	0.509	1
Psmc3ip	0.0355597	-1.05038	0.327	0.491	1
Tra2a	0.0356103	-0.463775	0.684	0.782	1
Mepce	0.0356562	0.701491	0.286	0.127	1
Ubn2	0.0357695	0.622535	0.612	0.473	1
Ifi206	0.035859	-3.27416	0.01	0.073	1
Cdca7	0.035859	-3.31472	0.01	0.073	1
Sema4a	0.035859	-2.55171	0.01	0.073	1
Rasgef1a	0.035859	-2.59606	0.01	0.073	1
Rin3	0.035859	-2.87896	0.01	0.073	1
Myo1f	0.035859	-2.62033	0.01	0.073	1
Zfp318	0.0358882	1.31264	0.245	0.109	1
Zfp61	0.0361189	1.41567	0.265	0.127	1
Casp8ap2	0.0362152	-0.932897	0.357	0.491	1
Mau2	0.0363902	1.01767	0.531	0.382	1
Ppp1r37	0.0365047	1.1059	0.388	0.218	1
Mapk8ip2	0.0366578	0.839017	0.531	0.345	1
Gpm6b	0.0366909	0.822127	0.408	0.236	1
Nfxl1	0.0368218	1.12959	0.306	0.145	1
Gnb1	0.0368376	0.549027	0.949	0.945	1
Bicd2	0.0368682	-1.56118	0.153	0.273	1
Trip12	0.0368707	0.649742	0.602	0.436	1
Sf3b2	0.0368937	0.480516	0.929	0.818	1
Snph	0.0368992	1.57022	0.143	0.036	1
Itpkb	0.0369624	-2.02096	0.01	0.073	1
Cybb	0.0369624	-3.51474	0.01	0.073	1
Fli1	0.0369624	-2.32451	0.01	0.073	1
Tnf	0.0369624	-2.28069	0.01	0.073	1
Rmnd5b	0.0370266	0.753243	0.316	0.145	1
Ttc33	0.0370494	1.12078	0.469	0.327	1
Cenpw	0.0371439	-0.839053	0.582	0.636	1
Mtus2	0.0371728	1.84826	0.112	0.018	1
Vwa3a	0.0371728	1.83166	0.112	0.018	1
Pirt	0.0371728	1.83887	0.112	0.018	1
Cnst	0.0371817	1.10646	0.316	0.164	1
Mtmr7	0.0371817	1.09657	0.316	0.164	1
App	0.0372965	0.61072	0.786	0.673	1
Txndc15	0.0373156	0.577434	0.49	0.364	1
Hmg20a	0.0373214	1.03773	0.276	0.127	1
Rpl27a	0.0373691	-0.184913	0.99	1	1
Slc25a5	0.0373883	-0.370842	0.867	0.909	1
Atp1b1	0.0374716	0.346513	0.786	0.691	1
Dctn1	0.0376056	0.488392	0.694	0.509	1
Asb3	0.0376318	0.238516	0.316	0.164	1
Trim13	0.0377217	0.947655	0.235	0.091	1
Ndufv3	0.0377842	0.421881	0.898	0.782	1
Tfam	0.0379039	-0.649247	0.408	0.545	1
Dclre1b	0.0380459	-1.53794	0.061	0.164	1
I830077J02Rik	0.0380947	-2.62404	0.01	0.073	1
Cyth2	0.0381198	0.328985	0.867	0.709	1
Rbbp6	0.0381615	0.538757	0.816	0.727	1
Atp9b	0.0382133	1.4461	0.143	0.036	1
Eif4g1	0.0382907	0.475456	0.622	0.455	1
Mgp	0.0385175	-0.532161	0.01	0	1
Vmn1r218	0.0385175	2.47113	0.01	0	1
Ankrd17	0.0385568	0.607669	0.531	0.345	1
Herpud1	0.0385568	0.806522	0.51	0.382	1
Btbd19	0.0386183	0.590931	0.378	0.2	1
H4f16	0.0386824	1.63354	0.112	0.018	1
Zfp94	0.0386824	1.71619	0.112	0.018	1
Stam	0.0388297	1.32782	0.347	0.2	1
Mapk14	0.0388616	-1.43597	0.102	0.218	1
Cxxc4	0.0388852	1.65596	0.143	0.036	1
1600012H06Rik	0.0390739	0.971252	0.204	0.073	1
Tmem208	0.0391007	0.566418	0.663	0.509	1
Rnf111	0.0391092	0.6268	0.459	0.291	1
Atp5e	0.0391413	-0.131544	0.99	1	1
Gdap1	0.0392515	0.616035	0.541	0.382	1
Wnt5b	0.0392563	-1.75053	0.01	0.073	1
Nutf2	0.0392563	-1.66334	0.01	0.073	1
Cbx6	0.0392715	0.42167	0.276	0.127	1
Ofd1	0.0392762	0.774155	0.378	0.218	1
Terf2	0.0392778	-0.937385	0.245	0.382	1
1700012B09Rik	0.0393496	3.29685	0.204	0.073	1
Snx20	0.0394347	-1.25229	0.061	0.164	1
Rab21	0.0394398	0.410158	0.622	0.491	1
Lysmd4	0.0394566	1.7342	0.112	0.018	1
Pigb	0.0394566	1.36077	0.112	0.018	1
Slc35e4	0.0394566	1.35562	0.112	0.018	1
Zmynd11	0.0394886	0.323114	0.857	0.709	1
Psmb8	0.0396157	-1.21963	0.153	0.291	1
Prkx	0.0398184	0.658928	0.49	0.309	1
Foxred1	0.0399492	-1.14811	0.122	0.255	1
2010300C02Rik	0.0400431	1.03916	0.265	0.127	1
Myg1	0.0401205	0.887823	0.408	0.273	1
Tap1	0.0401614	-2.13966	0.051	0.145	1
Nubp1	0.0401662	-0.695345	0.337	0.473	1
Gnas	0.0402384	0.258629	1	0.964	1
Adap1	0.0402443	-1.92095	0.031	0.109	1
Polh	0.0402443	-2.24395	0.031	0.109	1
Nipbl	0.040286	0.590235	0.724	0.636	1
Tm6sf1	0.0403273	-2.75592	0.041	0.127	1
Tbce	0.040336	0.668327	0.418	0.255	1
Tmem63b	0.0403467	0.593034	0.622	0.436	1
Clmn	0.0403709	0.857463	0.571	0.473	1
Dnaaf3	0.0404478	0.796048	0.01	0.073	1
Pawr	0.0404478	-0.7074	0.01	0.073	1
Upp1	0.0404478	1.06521	0.01	0.073	1
Nlrp3	0.0404478	-1.27215	0.01	0.073	1
Rbms1	0.0404984	0.680108	0.612	0.436	1
Coprs	0.0405171	-1.14529	0.214	0.364	1
Mfsd6	0.0405581	1.32692	0.265	0.127	1
Mif	0.0405731	-0.141581	0.939	0.909	1
Rubcn	0.0405732	1.38081	0.173	0.055	1
Chga	0.0406003	1.04873	0.663	0.509	1
Naxd	0.0406072	0.619101	0.776	0.618	1
Rps21	0.0406101	-0.24405	1	1	1
Cntn1	0.0406126	1.72993	0.163	0.055	1
Zfp637	0.0407798	0.626752	0.561	0.4	1
Limch1	0.0409612	1.53563	0.143	0.036	1
Fbxw17	0.0410191	1.22141	0.245	0.109	1
Rad54b	0.0410444	1.65314	0.112	0.018	1
Zfp46	0.0410444	1.16174	0.112	0.018	1
Ccdc112	0.0410811	0.554251	0.52	0.345	1
Sp140	0.0410861	-2.64863	0.02	0.091	1
Lat2	0.0410861	-3.22299	0.02	0.091	1
Arpin	0.0411051	2.18513	0.194	0.073	1
Wbp1	0.0411063	0.502317	0.663	0.473	1
Tnfrsf1a	0.0411623	-2.27751	0.041	0.127	1
Nme2	0.0411623	-1.7913	0.041	0.127	1
Anxa5	0.041182	0.483359	0.847	0.782	1
Vps37a	0.041334	0.840471	0.459	0.273	1
Timm8a1	0.041334	-0.96387	0.347	0.473	1
Clk2	0.0415105	0.593235	0.235	0.091	1
Prr13	0.0415305	0.671034	0.561	0.418	1
Stard3	0.04158	-0.755148	0.143	0.273	1
Fam221a	0.0416737	1.26252	0.143	0.036	1
Cd9	0.041678	0.29443	0.867	0.782	1
Tmem238	0.041683	-1.2234	0.245	0.4	1
Slc35g1	0.0417142	-1.57716	0.051	0.145	1
Fam107b	0.041743	1.15927	0.255	0.109	1
Gcat	0.041743	-0.758908	0.153	0.291	1
Plaat3	0.0417892	1.09678	0.551	0.418	1
Dennd3	0.0418584	2.18615	0.112	0.018	1
Hunk	0.0419782	0.774597	0.378	0.218	1
Mtfr1l	0.0420326	0.666306	0.51	0.345	1
Zfp974	0.0420945	-2.89643	0.031	0.109	1
Shld3	0.0421166	1.10668	0.245	0.109	1
Mad2l2	0.0421834	0.903314	0.571	0.436	1
Bean1	0.0422521	1.9393	0.214	0.091	1
Phlda3	0.0423324	1.10218	0.194	0.073	1
Mospd2	0.0423324	1.39736	0.194	0.073	1
Gm14296	0.0423417	-1.51115	0.061	0.164	1
Camsap1	0.0423486	1.01986	0.469	0.309	1
Cnnm4	0.0423968	1.04492	0.143	0.036	1
Whamm	0.042502	0.973634	0.224	0.091	1
Pcdhga12	0.0425202	1.02555	0.173	0.055	1
Srrm4	0.0425572	0.457766	0.633	0.436	1
Slc39a7	0.0426851	0.627907	0.367	0.2	1
Lrp3	0.042686	1.42554	0.112	0.018	1
Smurf2	0.0428424	0.429159	0.255	0.109	1
Fxyd5	0.0428765	-2.50081	0.041	0.127	1
Aplp1	0.0431274	0.457902	0.786	0.636	1
Prdm10	0.0431304	1.40612	0.143	0.036	1
Evi2a	0.0432119	-2.69103	0.02	0.091	1
Cd300c2	0.0432119	-3.75854	0.02	0.091	1
Il7r	0.0432119	-3.12574	0.02	0.091	1
Traip	0.0432389	1.04889	0.245	0.109	1
Clptm1	0.043295	1.27302	0.48	0.364	1
Ppp5c	0.0433142	0.569188	0.541	0.364	1
Tsg101	0.0434806	0.310195	0.888	0.764	1
Socs4	0.0435457	1.10311	0.306	0.164	1
Snrpf	0.0436874	-0.298168	0.98	0.982	1
Vmn1r236	0.0437106	-0.300044	0.01	0	1
Slco4c1	0.0437577	1.49275	0.071	0	1
Ephx1	0.0437577	1.86299	0.071	0	1
Prrg1	0.0437577	1.78306	0.071	0	1
Nmnat1	0.0437577	1.64134	0.071	0	1
Map3k5	0.0437577	1.43725	0.071	0	1
Shc2	0.0437577	2.14662	0.071	0	1
Nek10	0.0437577	1.73092	0.071	0	1
Igdcc3	0.0437577	2.03888	0.071	0	1
Fkbp1b	0.0437577	2.63439	0.071	0	1
Ccdc134	0.0437577	2.02427	0.071	0	1
Lca5l	0.0437577	1.66269	0.071	0	1
Fez2	0.0437577	1.24359	0.071	0	1
Gldc	0.0437577	1.77812	0.071	0	1
Slit1	0.0437577	1.99038	0.071	0	1
Taok1	0.0437955	0.348882	0.633	0.473	1
Scn3a	0.0438039	0.620713	0.398	0.236	1
Hecw2	0.0439402	0.755632	0.296	0.145	1
Polr2h	0.0439773	0.461431	0.704	0.545	1
Atpaf1	0.0439776	0.78234	0.276	0.127	1
Aida	0.0439783	1.04612	0.316	0.182	1
Tyms	0.0439825	-0.759566	0.347	0.473	1
Neto2	0.0439901	1.07728	0.327	0.182	1
Ramp1	0.0440161	-2.62625	0.031	0.109	1
Mob2	0.0440931	0.856238	0.469	0.291	1
Hp1bp3	0.0441221	0.320346	0.837	0.673	1
Siah1a	0.0443019	0.626196	0.582	0.473	1
Draxin	0.0443092	-2.0341	0.02	0.091	1
Gpcpd1	0.0444356	1.72013	0.316	0.164	1
Kif1b	0.0444476	0.630425	0.704	0.564	1
Klf10	0.0445201	0.823603	0.388	0.218	1
Ddrgk1	0.0446296	0.641836	0.622	0.491	1
Msto1	0.0446339	-1.6789	0.082	0.182	1
Elp6	0.0446663	1.24131	0.214	0.091	1
AW554918	0.0447452	-1.49723	0.071	0.182	1
Sdcbp	0.0447485	0.800651	0.653	0.545	1
Mindy2	0.0448048	0.668907	0.449	0.273	1
Bbs4	0.0448965	1.00004	0.388	0.236	1
Ptprn	0.0450044	-1.87297	0.031	0.109	1
Zfp715	0.0450044	-1.94809	0.031	0.109	1
Dhx30	0.0450466	0.56305	0.541	0.382	1
Rab5a	0.045221	0.336405	0.735	0.6	1
Elovl4	0.0453918	1.4918	0.163	0.055	1
Arhgdib	0.0454279	-1.00438	0.061	0.164	1
Aim2	0.04543	-2.23602	0.02	0.091	1
Apbb1ip	0.04543	-2.07024	0.02	0.091	1
Arhgef6	0.04543	-2.05813	0.02	0.091	1
Phc2	0.0455359	0.360285	0.714	0.564	1
Myt1l	0.0458361	0.607977	0.755	0.545	1
Pcdh10	0.0459339	1.65524	0.235	0.109	1
Prkcd	0.0460071	-1.23426	0.235	0.364	1
Pigv	0.0460113	-1.59391	0.031	0.109	1
Dock2	0.0460113	-3.21705	0.031	0.109	1
Ninl	0.0460247	1.18336	0.265	0.109	1
Mrps16	0.0460577	-1.06299	0.622	0.691	1
Dpysl2	0.0460887	0.280165	0.908	0.8	1
Mtfmt	0.0461118	1.66388	0.163	0.055	1
Eya3	0.0461729	0.858504	0.143	0.036	1
Dtnb	0.0461729	0.718513	0.143	0.036	1
Cnot4	0.0463781	1.03102	0.551	0.364	1
Dlx6	0.04645	0.474179	0.735	0.564	1
Mrpl27	0.0464836	0.561517	0.704	0.545	1
Slc7a5	0.0465435	-0.966588	0.245	0.382	1
Bcl2a1d	0.0465745	-1.70541	0.02	0.091	1
Ing3	0.0465774	1.47821	0.367	0.236	1
Rhoq	0.0465904	1.09969	0.327	0.182	1
Ankhd1	0.0466007	-0.646687	0.214	0.364	1
1110032A03Rik	0.0466109	0.191258	0.602	0.418	1
Mtmr10	0.0467548	1.02798	0.224	0.091	1
Gfy	0.0468826	0.870037	0.694	0.564	1
Ganc	0.0469612	1.2573	0.143	0.036	1
Mier2	0.0469612	1.0303	0.143	0.036	1
Gripap1	0.0470089	0.624375	0.5	0.345	1
Cd53	0.0470371	-1.90163	0.031	0.109	1
Ripor1	0.0470371	-1.68653	0.031	0.109	1
Camta1	0.0470916	0.388473	0.724	0.582	1
Rab11fip3	0.0473678	1.03868	0.245	0.109	1
Arl2bp	0.0474056	0.570359	0.694	0.582	1
Kdm7a	0.0474091	0.707266	0.673	0.564	1
Rac2	0.0474278	-1.07112	0.041	0.127	1
Rnaset2a	0.0475551	-1.06656	0.051	0.145	1
Mfsd11	0.0475558	1.4202	0.194	0.073	1
Ehmt2	0.0477356	0.688281	0.52	0.382	1
Sirpa	0.0477432	-1.51777	0.02	0.091	1
Prss8	0.0477432	-1.63291	0.02	0.091	1
Ganab	0.0477666	0.986477	0.418	0.255	1
Golga3	0.0478482	1.00609	0.306	0.164	1
Rps27l	0.048023	-0.318957	0.969	0.982	1
Napsa	0.0480821	-3.31202	0.031	0.109	1
Dld	0.0481325	0.7464	0.551	0.4	1
Ubqln1	0.0483028	0.842962	0.459	0.309	1
Nudt13	0.0483297	1.42633	0.163	0.055	1
Klf7	0.0483884	0.597303	0.755	0.709	1
Lrrfip1	0.0484611	-0.982706	0.112	0.236	1
Helz	0.0485454	1.03414	0.459	0.327	1
Pgd	0.048684	0.884425	0.286	0.145	1
Ccdc77	0.0487626	-0.843967	0.224	0.364	1
Zc3h13	0.0488572	0.432431	0.724	0.6	1
Utp11	0.0489717	0.412718	0.622	0.418	1
Tmem30a	0.048979	0.322365	0.673	0.527	1
Inka2	0.0490449	1.32287	0.235	0.109	1
Foxj2	0.0490886	1.3645	0.163	0.055	1
Macroh2a1	0.0491084	0.243956	0.99	0.964	1
Gpr162	0.0491244	2.05363	0.133	0.036	1
Erc1	0.0491334	-0.233676	0.296	0.164	1
Kif24	0.0491465	-1.28944	0.031	0.109	1
Ppcs	0.0491491	0.70023	0.204	0.073	1
Abcb7	0.0491711	0.982144	0.214	0.091	1
Tet1	0.0492362	1.07216	0.245	0.109	1
Gpr137b	0.0493508	0.858492	0.255	0.127	1
Nxnl2	0.0493508	0.982477	0.255	0.127	1
Fahd2a	0.0493508	-1.07375	0.163	0.291	1
Fanca	0.0493588	-0.995197	0.041	0.127	1
Vmn1r89	0.0493817	0.446405	0.02	0	1
Uqcrc1	0.0496548	0.469836	0.765	0.636	1
Slc9a8	0.0498575	1.52198	0.163	0.055	1
Kcna6	0.0499793	1.4701	0.133	0.036	1
Phf21b	0.0499793	1.74767	0.133	0.036	1
Zc3h6	0.05021	1.64351	0.265	0.127	1
Cct8	0.0502175	-0.620243	0.878	0.873	1
Phf20	0.0502585	0.412419	0.582	0.455	1
Lcp1	0.0503488	-1.51291	0.041	0.127	1
Unc93b1	0.0503488	-1.14871	0.041	0.127	1
Mllt6	0.0504643	0.753368	0.286	0.145	1
Ankrd42	0.0505261	1.22783	0.214	0.091	1
Golga7b	0.0506253	0.810131	0.347	0.218	1
Chpf	0.0506365	1.37912	0.163	0.055	1
Dync1li1	0.0506384	0.44555	0.663	0.491	1
Cks1b	0.0506609	-0.608343	0.643	0.782	1
Mcm6	0.0508322	-1.24985	0.296	0.418	1
Abhd14b	0.0508466	1.43249	0.133	0.036	1
Frmd4a	0.0508903	0.283558	0.582	0.364	1
Tmem184c	0.0509192	0.426563	0.337	0.182	1
Gdpd1	0.0509276	0.461625	0.704	0.545	1
Uqcrc2	0.0509449	0.301207	0.867	0.818	1
Plbd2	0.0509489	1.36522	0.204	0.091	1
Faf1	0.0510885	0.540082	0.5	0.309	1
Chchd5	0.0511337	1.20694	0.388	0.273	1
Tle3	0.0512369	0.943386	0.449	0.291	1
Cfl2	0.0512941	0.429535	0.531	0.345	1
Cngb1	0.0513553	1.6202	0.102	0.018	1
Ddost	0.0515429	0.454383	0.745	0.636	1
Banf1	0.051572	-0.507984	0.878	0.873	1
Kcna2	0.0517265	2.16466	0.133	0.036	1
Fam149a	0.0517265	1.61969	0.133	0.036	1
Setdb2	0.0518201	0.961099	0.194	0.073	1
Cenpj	0.0518413	0.262303	0.5	0.345	1
Foxo1	0.0519095	0.802835	0.398	0.236	1
B3galnt1	0.0519123	1.23675	0.214	0.091	1
Hacd2	0.0519813	0.743176	0.49	0.345	1
Cmtm8	0.051991	-0.63381	0.245	0.382	1
Sh3bgrl3	0.0519942	-1.08027	0.796	0.855	1
Nit1	0.0520152	0.626623	0.367	0.2	1
Mesd	0.0520481	0.58997	0.224	0.091	1
Selenow	0.0522116	0.227983	0.939	0.909	1
Dnttip1	0.0522965	0.656396	0.633	0.455	1
Mcm3	0.0523233	-0.55025	0.357	0.491	1
Dsel	0.0523786	1.70717	0.102	0.018	1
Klf12	0.0523786	2.05081	0.102	0.018	1
Mapk15	0.0525249	1.21565	0.255	0.127	1
Stmn4	0.0527064	1.21673	0.459	0.345	1
Rps24	0.0527178	-0.157464	1	1	1
Bcl2l1	0.0527538	0.309995	0.776	0.655	1
Hspe1	0.0528601	-0.337658	0.908	0.909	1
Mdm1	0.0528665	0.452695	0.786	0.6	1
Ube2v1	0.0530349	1.08267	0.163	0.055	1
Cbx2	0.0531253	0.699817	0.469	0.364	1
Mtus1	0.053419	1.76629	0.102	0.018	1
Crybg3	0.0534794	-1.97002	0.092	0.2	1
A830018L16Rik	0.0535245	1.42295	0.133	0.036	1
Zfp626	0.0535245	1.58961	0.133	0.036	1
C1galt1	0.0535612	0.917831	0.398	0.236	1
Sp110	0.0536039	-1.35322	0.031	0.109	1
Ranbp1	0.053637	-0.433402	0.939	0.964	1
Dst	0.0536382	0.728249	0.622	0.509	1
Ccnd1	0.0538674	-0.695326	0.337	0.491	1
Thoc2	0.0540008	0.382399	0.796	0.6	1
Cttn	0.0540323	0.647075	0.52	0.345	1
Tada1	0.054041	-0.815647	0.214	0.364	1
Usp18	0.054041	0.995366	0.316	0.182	1
Cda	0.0540512	0.186509	0.214	0.091	1
Pla2r1	0.0541518	1.68226	0.224	0.091	1
Ube2k	0.0544173	0.448722	0.847	0.782	1
Dlg5	0.0544429	1.50416	0.133	0.036	1
Prkar1b	0.0544765	1.66216	0.102	0.018	1
Dcun1d2	0.0544765	1.84646	0.102	0.018	1
Armc9	0.0545232	0.518257	0.245	0.109	1
Rabggtb	0.0545319	0.830391	0.418	0.273	1
Syngr2	0.0545579	-1.50356	0.122	0.236	1
Ctdsp1	0.0545641	-1.10748	0.102	0.218	1
Smc4	0.0546798	-0.513851	0.531	0.673	1
Dcaf6	0.0546859	1.06661	0.163	0.055	1
Gpsm3	0.0547696	-1.1604	0.031	0.109	1
Zfp955b	0.0548371	0.908442	0.194	0.073	1
Sqstm1	0.0548836	0.753397	0.571	0.418	1
Cdk7	0.054968	0.333974	0.306	0.164	1
2210016F16Rik	0.0550724	-0.643107	0.378	0.509	1
Kctd10	0.0551188	0.683752	0.378	0.236	1
Efcab2	0.0553743	2.37058	0.133	0.036	1
Clasrp	0.0554801	0.695517	0.286	0.145	1
Map10	0.0555274	1.71505	0.163	0.055	1
Psma2	0.055543	-0.395422	0.929	0.964	1
Lpin1	0.0555514	1.22561	0.102	0.018	1
Actg1	0.0555667	0.250378	0.98	0.982	1
Ogt	0.0557271	0.539248	0.633	0.473	1
Morc2a	0.0558385	0.996938	0.296	0.164	1
4930523C07Rik	0.0558451	-0.639404	0.061	0.164	1
Epcam	0.055914	0.353946	0.898	0.836	1
Mrpl30	0.056106	-0.327152	0.796	0.818	1
Gas2l1	0.0561611	0.673632	0.378	0.218	1
1110059G10Rik	0.0562662	0.545574	0.633	0.455	1
Kif21a	0.0562983	0.30051	0.765	0.618	1
Mapk6	0.0563064	0.498976	0.561	0.418	1
Zbtb26	0.0563191	1.2588	0.133	0.036	1
Vldlr	0.0563191	1.6478	0.133	0.036	1
Traf4	0.0563594	0.473506	0.724	0.564	1
Ccdc92	0.0563686	0.899056	0.378	0.255	1
Bag5	0.0563778	0.862439	0.357	0.218	1
Ccdc184	0.0563997	0.683581	0.194	0.073	1
Neurl4	0.0564179	0.598735	0.327	0.182	1
Map1lc3a	0.0565464	0.404567	0.786	0.655	1
Art5	0.0565684	0.476227	0.316	0.164	1
N4bp2l1	0.056644	1.27855	0.102	0.018	1
Dnah9	0.056644	1.32778	0.102	0.018	1
Abca5	0.056644	1.17526	0.102	0.018	1
Ccdc85c	0.056644	1.90965	0.102	0.018	1
Sap30l	0.0567959	0.994037	0.612	0.473	1
Agps	0.056797	0.720493	0.286	0.145	1
Zbtb24	0.0569574	1.16306	0.184	0.073	1
Sinhcaf	0.0571754	0.171838	0.867	0.764	1
Phlda1	0.0571897	0.549652	0.52	0.418	1
Dbndd1	0.0571948	0.837125	0.194	0.073	1
Triqk	0.0572389	1.02559	0.235	0.109	1
Vamp2	0.0575768	0.406323	0.622	0.436	1
Tmem101	0.0575863	0.766992	0.388	0.255	1
Jag2	0.0575913	0.992336	0.357	0.218	1
Mpzl1	0.0577272	0.718975	0.531	0.4	1
Mndal	0.0577544	-0.67641	0.041	0.127	1
Klhl26	0.0577544	1.56326	0.102	0.018	1
Fgf9	0.0577544	1.25304	0.102	0.018	1
Clec16a	0.0577544	1.3962	0.102	0.018	1
Vgll4	0.0577686	0.393294	0.806	0.673	1
Rexo1	0.0579407	-0.616358	0.5	0.582	1
Mtr	0.0579992	-1.175	0.112	0.218	1
Rps7	0.0580393	-0.154093	1	1	1
Qars	0.0580822	0.651755	0.429	0.273	1
Gpr37	0.0584146	1.35887	0.245	0.109	1
Usp11	0.0584159	1.82089	0.153	0.055	1
Pdss2	0.0584797	-1.07974	0.092	0.2	1
Cbx3	0.0585327	-0.248492	0.959	0.945	1
Rap1gds1	0.0585892	-0.803736	0.245	0.382	1
Gnb2	0.0587635	-0.188057	0.929	0.945	1
Enox1	0.0588644	-0.653312	0.112	0.218	1
Ccdc9b	0.0588828	1.07625	0.102	0.018	1
Eif3f	0.0590459	0.168403	0.959	0.964	1
Rbbp7	0.0591969	-0.70254	0.459	0.636	1
Cdkl3	0.0592341	1.21088	0.133	0.036	1
Tom1	0.059235	0.598891	0.418	0.255	1
Gramd1a	0.0592748	-1.43971	0.143	0.255	1
Gng12	0.0593262	-0.939928	0.082	0.182	1
Dbt	0.059329	1.35785	0.214	0.091	1
Atxn10	0.0593883	0.609266	0.755	0.618	1
Gipc3	0.0594522	0.83338	0.357	0.218	1
Il17a	0.0595249	-3.0327	0	0.036	1
Icos	0.0595249	-3.5989	0	0.036	1
Cyp27a1	0.0595249	-2.01624	0	0.036	1
Lhx4	0.0595249	-2.4784	0	0.036	1
Fcgr4	0.0595249	-2.10381	0	0.036	1
Kmo	0.0595249	-2.0575	0	0.036	1
Hsd11b1	0.0595249	-2.79667	0	0.036	1
St8sia6	0.0595249	-2.47811	0	0.036	1
Card9	0.0595249	-2.44634	0	0.036	1
Pkn3	0.0595249	-2.06814	0	0.036	1
Gm34653	0.0595249	-2.28224	0	0.036	1
Ermn	0.0595249	-1.77913	0	0.036	1
Nkain4	0.0595249	-1.88602	0	0.036	1
Kcnq2	0.0595249	-2.31939	0	0.036	1
Chst7	0.0595249	-4.09323	0	0.036	1
Map7d3	0.0595249	-1.75804	0	0.036	1
Cnksr2	0.0595249	-2.15576	0	0.036	1
Mgst2	0.0595249	-2.4358	0	0.036	1
H2ac21	0.0595249	-1.75621	0	0.036	1
Fcgr1	0.0595249	-2.40303	0	0.036	1
Arhgap29	0.0595249	-2.00371	0	0.036	1
Pde5a	0.0595249	-2.70334	0	0.036	1
Stra6l	0.0595249	-2.76214	0	0.036	1
Ccdc180	0.0595249	-2.71527	0	0.036	1
Ror1	0.0595249	-2.5427	0	0.036	1
Zbtb8b	0.0595249	-2.15616	0	0.036	1
Xkr8	0.0595249	-2.34286	0	0.036	1
Padi6	0.0595249	-1.91479	0	0.036	1
Hgfac	0.0595249	-2.01923	0	0.036	1
Bend4	0.0595249	-2.38549	0	0.036	1
Ccdc158	0.0595249	-2.16499	0	0.036	1
Abcg3	0.0595249	-2.09725	0	0.036	1
Mfsd7a	0.0595249	-2.01624	0	0.036	1
Rhof	0.0595249	-2.36886	0	0.036	1
Pilrb2	0.0595249	-1.78008	0	0.036	1
Clec4a1	0.0595249	-2.06967	0	0.036	1
Clec4a2	0.0595249	-2.72519	0	0.036	1
Cd33	0.0595249	-2.40519	0	0.036	1
Siglece	0.0595249	-2.10747	0	0.036	1
Cckbr	0.0595249	-1.90101	0	0.036	1
Itgal	0.0595249	-2.67828	0	0.036	1
Cd163l1	0.0595249	-5.03503	0	0.036	1
Olfr60	0.0595249	-3.22931	0	0.036	1
Pbld2	0.0595249	-2.31791	0	0.036	1
Bbs10	0.0595249	-1.79193	0	0.036	1
Cd209a	0.0595249	-2.90642	0	0.036	1
Hmox1	0.0595249	-2.12802	0	0.036	1
Il27ra	0.0595249	-3.27646	0	0.036	1
Fhod1	0.0595249	-2.47768	0	0.036	1
Maf	0.0595249	-3.22639	0	0.036	1
Gm3739	0.0595249	-1.89828	0	0.036	1
Plau	0.0595249	-2.02238	0	0.036	1
Tssk4	0.0595249	-1.87406	0	0.036	1
Arl11	0.0595249	-2.79395	0	0.036	1
Blk	0.0595249	-4.2549	0	0.036	1
Nrgn	0.0595249	-3.29852	0	0.036	1
Ttc36	0.0595249	-2.06962	0	0.036	1
Slco2a1	0.0595249	-1.84644	0	0.036	1
Scn10a	0.0595249	-2.31709	0	0.036	1
Cxcr6	0.0595249	-4.95345	0	0.036	1
Fbxo48	0.0595249	-1.85872	0	0.036	1
Clec10a	0.0595249	-3.48256	0	0.036	1
Abhd15	0.0595249	-2.61843	0	0.036	1
Ccl9	0.0595249	-2.25725	0	0.036	1
Plxdc1	0.0595249	-2.3959	0	0.036	1
Cd300lg	0.0595249	-2.01754	0	0.036	1
Gm11627	0.0595249	-2.12268	0	0.036	1
Cd300lf	0.0595249	-1.62045	0	0.036	1
Trim65	0.0595249	-2.46381	0	0.036	1
Serpinb6c	0.0595249	-3.55705	0	0.036	1
Nkd2	0.0595249	-2.05148	0	0.036	1
Gm21188	0.0595249	-4.12564	0	0.036	1
Rgs6	0.0595249	-1.63747	0	0.036	1
Asb2	0.0595249	-2.10908	0	0.036	1
Begain	0.0595249	-1.77376	0	0.036	1
Ly6m	0.0595249	-1.65407	0	0.036	1
Ly6i	0.0595249	-2.67541	0	0.036	1
Commd5	0.0595249	-1.89027	0	0.036	1
Mb	0.0595249	-3.95943	0	0.036	1
Csf2rb2	0.0595249	-2.11071	0	0.036	1
Nfam1	0.0595249	-2.09661	0	0.036	1
Prr5	0.0595249	-1.87773	0	0.036	1
Rnd1	0.0595249	-2.45505	0	0.036	1
Itga5	0.0595249	-2.50335	0	0.036	1
Bex6	0.0595249	-3.08139	0	0.036	1
Ppt2	0.0595249	-2.36618	0	0.036	1
Taf4b	0.0595249	-2.06809	0	0.036	1
Psd2	0.0595249	-1.70723	0	0.036	1
Nudt8	0.0595249	-2.32188	0	0.036	1
Pdcd1lg2	0.0595249	-2.02223	0	0.036	1
Ifit3b	0.0595249	-2.07711	0	0.036	1
Rbm20	0.0595249	-2.04743	0	0.036	1
Vmn1r225	0.0595249	-1.15797	0	0.018	1
Farsb	0.0595406	-0.596557	0.235	0.4	1
Ppp1r2	0.05958	0.538804	0.806	0.709	1
Vmn1r184	0.059673	1.02556	0.082	0	1
Mpnd	0.0599028	0.52547	0.622	0.491	1
Ttll3	0.0600294	1.14521	0.102	0.018	1
Fscn1	0.0600318	0.405769	0.469	0.291	1
Wdfy3	0.0600529	0.683312	0.449	0.291	1
Kcnj3	0.0602113	1.0302	0.235	0.109	1
Snta1	0.0602113	1.04876	0.235	0.109	1
Rbm19	0.0602332	1.26634	0.133	0.036	1
Cc2d1a	0.0602332	1.14519	0.133	0.036	1
Tmem129	0.0602482	2.00274	0.153	0.055	1
Pcdh1	0.0602482	1.51762	0.153	0.055	1
Phf13	0.0602592	0.869442	0.265	0.127	1
Taf10	0.0602698	-0.33705	0.867	0.855	1
Rpl23a	0.0603392	-0.191038	0.969	0.982	1
Tnrc6c	0.0604653	0.41104	0.816	0.745	1
Trip13	0.0607299	1.19439	0.286	0.164	1
Ift172	0.0607355	0.603237	0.337	0.182	1
Plac8	0.0608057	1.94837	0.163	0.055	1
Wipi1	0.0608057	0.930972	0.163	0.055	1
Fry	0.0608103	1.30328	0.224	0.109	1
Krt18	0.0608629	0.681274	0.745	0.636	1
Eef1e1	0.0609424	-0.432422	0.622	0.709	1
Nnat	0.0610079	1.0366	0.49	0.364	1
Gprc5b	0.06114	1.19776	0.184	0.073	1
Pcmtd2	0.0611453	0.721791	0.469	0.309	1
Mtrf1	0.0611821	-1.24569	0.082	0.182	1
Fat4	0.0611945	0.984911	0.102	0.018	1
Tmem178b	0.0611945	0.72995	0.102	0.018	1
Mettl23	0.0612533	0.259287	0.776	0.655	1
Stoml2	0.0613562	-0.533154	0.602	0.709	1
Apip	0.0613769	-0.799645	0.378	0.527	1
Gng13	0.0614262	1.543	0.153	0.036	1
Scpep1	0.061429	1.52821	0.286	0.164	1
Sp3	0.0614331	0.480644	0.561	0.382	1
Pcbp1	0.0615046	-0.235399	0.898	0.891	1
Dip2b	0.0615538	0.997868	0.367	0.218	1
Itsn2	0.0615843	1.05006	0.255	0.127	1
Mphosph9	0.0617172	0.862189	0.265	0.127	1
Apba1	0.0617183	0.60264	0.214	0.091	1
Pex7	0.0618006	0.644826	0.449	0.327	1
Trmt1	0.0618106	0.826661	0.347	0.2	1
Atp6v1f	0.0619342	-0.414648	0.878	0.873	1
Paip1	0.0619476	0.338195	0.653	0.473	1
Slc31a2	0.0620063	1.65282	0.184	0.073	1
Mthfd2l	0.0622977	0.523822	0.653	0.509	1
Dcun1d5	0.062324	-0.495332	0.694	0.8	1
Atat1	0.0624434	0.584078	0.449	0.291	1
B230118H07Rik	0.0624434	0.855158	0.439	0.309	1
Atp5c1	0.0627142	-0.326361	0.969	0.964	1
Hba-a1	0.0628687	1.56088	0.01	0	1
Krt15	0.0628687	2.90503	0.01	0	1
Col4a4	0.0629077	1.9211	0.061	0	1
Dnm3	0.0629077	1.37132	0.061	0	1
Taf1a	0.0629077	1.60088	0.061	0	1
Kcnh7	0.0629077	1.46881	0.061	0	1
Rbm41	0.0629077	1.16817	0.061	0	1
Lhfpl1	0.0629077	1.7029	0.061	0	1
Rnf138rt1	0.0629077	1.05545	0.061	0	1
S100a16	0.0629077	2.40668	0.061	0	1
Wars2	0.0629077	1.78725	0.061	0	1
Lef1	0.0629077	1.9633	0.061	0	1
Kcnh2	0.0629077	1.1582	0.061	0	1
Rassf6	0.0629077	1.50769	0.061	0	1
Vmn1r9	0.0629077	2.76312	0.061	0	1
Cdc42ep5	0.0629077	1.27155	0.061	0	1
Zfp473	0.0629077	1.5208	0.061	0	1
Gdpd3	0.0629077	1.6368	0.061	0	1
Slc38a7	0.0629077	3.00758	0.061	0	1
Ldhd	0.0629077	1.71653	0.061	0	1
Il20rb	0.0629077	1.29551	0.061	0	1
Cfap52	0.0629077	2.13267	0.061	0	1
Sarm1	0.0629077	1.3817	0.061	0	1
Xylt2	0.0629077	1.75804	0.061	0	1
Pgbd1	0.0629077	1.68198	0.061	0	1
Tmem18	0.0629077	1.33463	0.061	0	1
Gm527	0.0629077	1.7176	0.061	0	1
Vash1	0.0629077	1.85591	0.061	0	1
Mfsd3	0.0629077	1.23158	0.061	0	1
Dynlt1c	0.0629077	1.26501	0.061	0	1
Pcdhb14	0.0629077	0.891548	0.061	0	1
Tbc1d30	0.0630859	1.449	0.153	0.055	1
Cd99l2	0.0630867	0.910998	0.255	0.127	1
Zbed3	0.0633107	0.826972	0.235	0.109	1
Slc4a7	0.0633496	0.921387	0.49	0.364	1
Drg1	0.063444	0.650563	0.51	0.364	1
Rsph3a	0.0635969	0.873654	0.163	0.055	1
Slc25a16	0.0636437	1.22422	0.245	0.127	1
Arpc1b	0.0636494	-1.35913	0.316	0.418	1
Rcbtb1	0.0637774	0.734654	0.286	0.145	1
Rps6kb2	0.0638128	0.918755	0.347	0.2	1
Dmtf1	0.0638152	0.179578	0.347	0.182	1
Mcm10	0.0638624	-1.46161	0.092	0.2	1
Nrm	0.0640052	-0.711372	0.204	0.327	1
Snrpd2	0.0640537	-0.339365	0.949	0.945	1
3110082I17Rik	0.0640559	1.65781	0.153	0.055	1
Fbxo16	0.0640964	1.76004	0.204	0.091	1
Cpt2	0.0643703	0.856017	0.133	0.036	1
Ptov1	0.064442	0.317602	0.898	0.764	1
Gpd2	0.0644526	0.829794	0.327	0.2	1
Fbxl5	0.0644526	1.0164	0.327	0.2	1
Dbn1	0.0644906	0.390606	0.796	0.673	1
Agfg2	0.0645505	-0.347433	0.163	0.055	1
Cd2bp2	0.0645831	0.75003	0.439	0.291	1
Pknox1	0.0646621	0.546339	0.316	0.164	1
Dynlt1f	0.0647705	0.28934	0.929	0.855	1
Pabpc1l	0.0647997	0.505759	0.337	0.182	1
Fam104a	0.0648639	0.316225	0.857	0.8	1
Mageh1	0.0648974	0.413901	0.449	0.273	1
Mical3	0.0649121	0.915767	0.429	0.327	1
Csde1	0.0650882	0.392669	0.837	0.764	1
Lrrfip2	0.0652194	-0.911504	0.429	0.545	1
Nap1l4	0.0653279	0.196983	0.837	0.709	1
Nktr	0.0653587	0.389343	0.796	0.709	1
Ndufs5	0.0653858	-0.374531	0.898	0.964	1
Hexdc	0.0654404	0.90419	0.133	0.036	1
Pnma1	0.0654404	1.07618	0.133	0.036	1
Prxl2b	0.0654791	1.01227	0.531	0.418	1
Ypel5	0.0654904	0.673429	0.265	0.127	1
Spire2	0.0655159	0.793064	0.163	0.055	1
Ndufv2	0.0657668	0.311361	0.796	0.691	1
Clns1a	0.0660058	0.385008	0.735	0.582	1
Rmdn1	0.0660331	1.27132	0.153	0.055	1
Tigd2	0.0661943	-1.00558	0.204	0.327	1
Fbxl16	0.0662674	0.931506	0.265	0.127	1
Cdon	0.0663778	-1.86735	0.061	0.145	1
Def6	0.0663778	-1.94204	0.061	0.145	1
Trib1	0.0665476	0.429827	0.306	0.164	1
Pcnx	0.0666587	-1.27356	0.173	0.291	1
Trappc8	0.0668015	1.1497	0.245	0.127	1
Nkiras2	0.0670011	0.230516	0.5	0.345	1
Mkks	0.0670403	1.28479	0.153	0.055	1
Fbxo22	0.0672397	0.188198	0.622	0.491	1
Mxd4	0.0672739	0.407604	0.469	0.309	1
Foxj3	0.0672855	1.076	0.224	0.109	1
Pcyt2	0.067287	0.563649	0.306	0.164	1
Arhgap17	0.0672985	0.70953	0.337	0.2	1
Palm	0.0674713	0.267638	0.827	0.636	1
Tapbpl	0.067484	0.286149	0.194	0.073	1
Phtf1	0.0675637	0.738197	0.316	0.164	1
Zbtb21	0.0677766	0.867616	0.255	0.127	1
Herc1	0.0678335	0.425484	0.622	0.491	1
Rtl8b	0.0678896	0.815346	0.347	0.218	1
H2bu2	0.0679142	0.197794	0.847	0.745	1
Irf2bp1	0.0680109	0.283459	0.459	0.309	1
Ift122	0.0680256	1.13332	0.286	0.164	1
Tmsb15b2	0.0680602	1.22918	0.153	0.055	1
Tob1	0.0681423	0.648525	0.52	0.418	1
Tcp11	0.0682059	1.30727	0.235	0.109	1
Dctn6	0.0682233	0.78946	0.52	0.4	1
Abcf3	0.0684085	0.639468	0.296	0.145	1
Ric8a	0.0684276	0.2844	0.48	0.309	1
Mxi1	0.0685379	0.619626	0.755	0.6	1
Ktn1	0.0685411	0.42787	0.684	0.527	1
Rpl27	0.0685675	-0.185109	0.99	0.982	1
Nipsnap3b	0.0685727	0.744381	0.582	0.491	1
Prrc2a	0.0686136	0.485283	0.643	0.527	1
Ppp4r3a	0.0686569	0.532896	0.541	0.4	1
Ube2l3	0.0689019	-0.539893	0.796	0.927	1
Ilf3	0.0689326	0.518489	0.571	0.418	1
Psmd2	0.0693391	0.26317	0.806	0.655	1
Chid1	0.0693591	1.06786	0.204	0.091	1
Zfp512	0.0693855	0.433931	0.449	0.309	1
Stk17b	0.0695498	-1.88344	0.071	0.164	1
Casp3	0.0696091	0.294501	0.918	0.745	1
Kctd15	0.0696723	0.335415	0.357	0.236	1
Tenm4	0.0697578	0.475261	0.602	0.418	1
Fbxl18	0.0698685	-0.796799	0.133	0.036	1
Cdc27	0.0698685	0.405937	0.133	0.036	1
Dnaja1	0.0700198	-0.238776	0.98	0.945	1
Rbm5	0.0700668	0.363082	0.643	0.491	1
Nprl3	0.0701382	-0.988114	0.082	0.182	1
Dusp12	0.0701382	1.25125	0.153	0.055	1
Dcp1b	0.0701382	1.40556	0.153	0.055	1
Cog5	0.0701964	-0.588151	0.235	0.382	1
Emc10	0.0702044	0.312687	0.755	0.636	1
Kif3c	0.070227	1.43805	0.245	0.145	1
Hmga1	0.0702698	0.974091	0.204	0.091	1
Zmym4	0.0704373	0.657235	0.439	0.291	1
Anxa11	0.0706346	0.764269	0.459	0.309	1
Cxxc5	0.0707085	0.940782	0.582	0.509	1
Dlg3	0.0710904	0.570956	0.265	0.127	1
Coq2	0.0711169	0.481296	0.561	0.436	1
Sgsm1	0.0711966	1.58199	0.153	0.055	1
Map3k11	0.0711966	1.18911	0.153	0.055	1
Kctd9	0.0713405	0.572506	0.316	0.164	1
Coasy	0.0713871	0.686968	0.449	0.309	1
Lrif1	0.0716906	-0.892391	0.184	0.309	1
Churc1	0.0717043	0.189602	0.837	0.709	1
Srgn	0.0717796	-1.30448	0.061	0.164	1
Trim12c	0.0717796	-1.63662	0.071	0.164	1
Nfatc2ip	0.0721207	-0.498104	0.122	0.236	1
Ccdc84	0.0722001	1.47339	0.122	0.036	1
Zfhx3	0.072833	-0.326784	0.398	0.545	1
Zmym2	0.0728679	0.795945	0.469	0.345	1
Fam98a	0.0728989	0.94974	0.306	0.182	1
Selenoo	0.073061	0.878197	0.204	0.091	1
Thg1l	0.0730741	-0.96492	0.194	0.309	1
Ide	0.0731342	-0.890729	0.204	0.327	1
Pttg1ip	0.0732166	0.744464	0.327	0.2	1
Klc2	0.0733051	0.769985	0.367	0.218	1
Pih1d2	0.0734071	1.0375	0.224	0.109	1
Fubp3	0.0734172	1.14223	0.378	0.236	1
Setbp1	0.0734172	0.970128	0.378	0.236	1
Zfpl1	0.0735559	0.566642	0.459	0.327	1
Hdc	0.073675	0.650508	0.163	0.055	1
5330417C22Rik	0.0737298	1.72637	0.092	0.018	1
Ankrd27	0.0737298	1.81051	0.092	0.018	1
Arrdc2	0.0737298	1.29814	0.092	0.018	1
Ncbp2	0.0737379	0.323728	0.745	0.582	1
Cenpl	0.0738493	1.30118	0.296	0.182	1
Rsph1	0.0739028	0.503652	0.561	0.418	1
Slc25a27	0.0739028	0.716713	0.52	0.418	1
Bcl2l12	0.0739445	-1.55127	0.133	0.236	1
Wdr26	0.0740015	0.448656	0.653	0.527	1
Nsg1	0.0742336	0.41074	0.745	0.6	1
Apmap	0.0742578	1.64695	0.337	0.164	1
Pnkp	0.0743682	0.909896	0.286	0.164	1
Klf16	0.0743795	1.07319	0.245	0.127	1
Slc25a17	0.0743882	0.500076	0.724	0.582	1
Dcaf5	0.0744505	0.891488	0.153	0.055	1
Wsb1	0.0744781	0.43854	0.531	0.345	1
Tnik	0.0744991	0.861436	0.367	0.236	1
Rev3l	0.0747575	0.549649	0.51	0.4	1
Usp48	0.0748033	0.337074	0.643	0.527	1
Myo9b	0.0748887	-1.15614	0.133	0.236	1
Cfap61	0.0751723	1.62575	0.092	0.018	1
Scn5a	0.0751723	1.31761	0.092	0.018	1
Tenm2	0.0751723	1.7565	0.092	0.018	1
Prrc1	0.0752487	0.961431	0.367	0.236	1
Wipi2	0.0755292	0.722346	0.418	0.273	1
Urgcp	0.0755618	0.986897	0.153	0.055	1
Sars	0.0756464	0.426955	0.735	0.582	1
Ip6k2	0.0757332	0.506626	0.622	0.527	1
Nedd4	0.0758275	0.349345	0.908	0.818	1
Slc37a1	0.0758861	1.24185	0.194	0.091	1
Ctdspl	0.0758899	-1.35134	0.061	0.145	1
Rps18	0.0761078	-0.165649	1	1	1
Ifrd1	0.0761707	0.413655	0.602	0.455	1
Gnao1	0.0762047	0.258851	0.796	0.6	1
Stk11ip	0.0762648	0.783571	0.184	0.073	1
Adk	0.0762826	0.711786	0.551	0.4	1
Cpsf6	0.0765472	0.273536	0.796	0.691	1
Sacs	0.0766377	1.65175	0.092	0.018	1
Ttll6	0.0766377	1.43826	0.092	0.018	1
Cyb561d1	0.0766866	0.862729	0.153	0.055	1
AI837181	0.0766993	0.603862	0.306	0.164	1
Grasp	0.0768279	0.483542	0.602	0.418	1
Acox1	0.0769229	-0.280095	0.122	0.236	1
Sec63	0.0770371	0.837222	0.439	0.309	1
Rtn4	0.0770919	0.280277	0.898	0.836	1
Msh3	0.077147	0.579387	0.276	0.145	1
Tmem186	0.0771535	1.24589	0.122	0.036	1
Pifo	0.0773035	0.304747	0.184	0.073	1
Fam193b	0.0773636	0.491029	0.48	0.327	1
Sptan1	0.0774105	0.533278	0.571	0.436	1
Zyx	0.0774969	-1.81486	0.092	0.182	1
Ago2	0.0774986	0.687816	0.582	0.455	1
Rasa1	0.0775586	0.592666	0.459	0.309	1
Tcaf1	0.0775941	0.339095	0.531	0.327	1
Tmem59	0.0777616	0.315227	0.867	0.8	1
Casp7	0.0778802	-1.09009	0.224	0.345	1
Bach2	0.0778996	0.571831	0.49	0.345	1
Ube4b	0.0780157	1.33305	0.276	0.145	1
Golga2	0.0780528	1.15929	0.224	0.109	1
Wdr54	0.0781225	0.400696	0.286	0.145	1
Wdhd1	0.0781225	-0.949949	0.194	0.309	1
Pgap1	0.0781264	1.38046	0.092	0.018	1
Zfp711	0.0781264	1.69041	0.092	0.018	1
Tgfb3	0.0781264	1.3828	0.092	0.018	1
Tcf4	0.0781521	0.379744	0.878	0.8	1
Trim33	0.0781794	0.707319	0.51	0.4	1
Cep128	0.0783002	1.0626	0.173	0.073	1
Ndufa2	0.0783152	-0.207377	0.949	0.945	1
Pygb	0.0784342	0.991603	0.122	0.036	1
Gspt2	0.0784342	1.15142	0.122	0.036	1
Acrbp	0.0784342	1.69681	0.122	0.036	1
Osbp2	0.0784342	1.13852	0.122	0.036	1
Btbd7	0.0785231	0.555827	0.602	0.436	1
Creld2	0.0785468	-0.912976	0.296	0.418	1
Trim37	0.0786093	0.641751	0.49	0.345	1
Pum2	0.0787311	0.184966	0.643	0.527	1
Rangrf	0.0788226	-0.179564	0.071	0.164	1
Ergic2	0.078851	0.460166	0.602	0.455	1
Arf4	0.0788619	0.419465	0.878	0.818	1
Cfap45	0.0788844	0.992722	0.245	0.127	1
Zc3h4	0.0789092	1.57949	0.194	0.091	1
Tmtc4	0.0789341	0.658554	0.296	0.164	1
Stau2	0.0789909	1.0183	0.276	0.164	1
Qtrt1	0.0791206	0.927932	0.408	0.273	1
Rassf4	0.0791518	0.667422	0.469	0.345	1
Eif4a2	0.0792496	0.476312	0.653	0.582	1
Aggf1	0.0793055	0.729633	0.51	0.382	1
Gpr173	0.0793827	1.3588	0.173	0.073	1
Rnf126	0.0794018	0.653076	0.663	0.491	1
Creld1	0.0794153	0.731991	0.184	0.073	1
Poglut1	0.0794153	0.552129	0.184	0.073	1
G3bp2	0.0794418	0.443958	0.776	0.636	1
Rgmb	0.079506	0.456596	0.622	0.509	1
Morn2	0.0795394	0.643624	0.571	0.473	1
Pofut1	0.0796385	1.0453	0.092	0.018	1
Aldh6a1	0.0796385	1.11769	0.092	0.018	1
Trim68	0.0797321	1.42955	0.122	0.036	1
Ccdc32	0.0797375	-0.297527	0.418	0.236	1
mt-Nd5	0.0797884	-0.195642	0.898	0.891	1
Ttll10	0.0799273	0.940103	0.204	0.091	1
Zscan21	0.0799585	0.586996	0.316	0.182	1
Ptpn22	0.0800494	-1.20673	0.071	0.164	1
Zmpste24	0.0800514	0.53161	0.429	0.291	1
Zfp30	0.0800888	0.723708	0.388	0.255	1
Dll4	0.080143	0.41472	0.153	0.055	1
Cep72	0.0804774	1.16733	0.173	0.073	1
Marcks	0.0805616	0.219511	0.939	0.909	1
Gtf3c4	0.0807512	0.86716	0.276	0.164	1
Jkamp	0.0808023	0.764417	0.316	0.182	1
Egln1	0.08103	0.511325	0.418	0.255	1
Defb25	0.0810474	1.3359	0.122	0.036	1
Stk26	0.0810474	1.09523	0.122	0.036	1
Ndufaf5	0.0810474	-1.30683	0.061	0.145	1
Wasf2	0.0810972	0.137935	0.735	0.636	1
Pappa	0.0811744	1.56602	0.092	0.018	1
Pqlc2	0.0811744	1.23413	0.092	0.018	1
Zfp280b	0.0811744	1.30822	0.092	0.018	1
Snx25	0.0811744	0.844552	0.092	0.018	1
Tpi1	0.0812653	0.43057	0.847	0.655	1
Dnajc8	0.0814268	0.258602	0.867	0.818	1
Ddx17	0.0814417	-0.101408	0.653	0.509	1
Trnt1	0.0815665	0.938982	0.418	0.309	1
Rb1	0.0816253	0.672383	0.541	0.436	1
Coq6	0.0816986	0.479714	0.255	0.127	1
Ddr1	0.0818063	0.118131	0.469	0.364	1
Myo1b	0.0819576	0.402461	0.673	0.545	1
Slc25a44	0.0819827	0.554032	0.204	0.091	1
Trp53rka	0.0820639	1.08938	0.255	0.145	1
Pigt	0.0821964	0.305952	0.541	0.382	1
Gpat3	0.0823803	1.11392	0.122	0.036	1
Ppp1r12b	0.0825168	0.954832	0.153	0.055	1
Syngr3	0.0825168	0.939382	0.153	0.055	1
Thyn1	0.0826716	0.413135	0.408	0.236	1
Slc4a3	0.0827342	0.990623	0.092	0.018	1
Lrrc23	0.0827342	1.3548	0.092	0.018	1
Enpp1	0.0827342	0.956959	0.092	0.018	1
Rtn4ip1	0.0827342	1.20176	0.092	0.018	1
Nptx2	0.0827342	1.08241	0.082	0.018	1
Mapk1	0.0828251	-0.578337	0.531	0.636	1
Mrpl15	0.082891	-0.453087	0.724	0.764	1
Gan	0.0829351	0.786317	0.224	0.109	1
Ric3	0.0829411	1.30891	0.214	0.109	1
Slc16a11	0.0830832	0.751993	0.337	0.182	1
Stim2	0.0830917	1.13386	0.194	0.091	1
Ctif	0.0832678	-1.0378	0.102	0.2	1
Zdhhc14	0.0835041	0.56946	0.347	0.2	1
Cir1	0.083524	0.484605	0.653	0.509	1
Pym1	0.0836432	0.58661	0.51	0.382	1
Fancl	0.0837199	-0.831309	0.224	0.327	1
Zfp811	0.0837309	1.24141	0.122	0.036	1
Otulinl	0.0837309	-1.44078	0.061	0.145	1
Spata33	0.0838351	0.879651	0.173	0.073	1
Ascc1	0.0838472	0.123692	0.418	0.273	1
Taf5	0.08387	1.24002	0.286	0.164	1
Nfrkb	0.0838826	-0.454358	0.327	0.473	1
Klc1	0.0839705	0.298293	0.735	0.564	1
Med23	0.0840807	1.245	0.204	0.091	1
Trnp1	0.084288	0.509646	0.684	0.582	1
Ikzf2	0.0843182	1.06744	0.092	0.018	1
Dffa	0.0843182	0.98426	0.092	0.018	1
Zbtb39	0.0843182	0.916417	0.092	0.018	1
Vwa5a	0.0843182	0.72262	0.092	0.018	1
Kif27	0.0843182	0.826965	0.092	0.018	1
Sept2	0.084528	-1.44807	0.051	0.127	1
Nufip2	0.0845611	0.888907	0.408	0.273	1
Lrrc56	0.0845805	0.978732	0.245	0.127	1
Armc1	0.0846377	0.563172	0.684	0.509	1
Atp8b4	0.0847401	0.27809	0.694	0.509	1
Fam131c	0.0848568	0.928548	0.48	0.364	1
Bbc3	0.084863	0.7898	0.388	0.255	1
Ift81	0.0848774	0.286154	0.49	0.364	1
Clec11a	0.0849474	0.697336	0.153	0.055	1
Ccdc138	0.084956	0.844044	0.224	0.109	1
Tomm7	0.0849751	-0.282534	0.929	0.982	1
Arid5a	0.0849793	1.30514	0.173	0.073	1
Smim4	0.0849888	-0.671867	0.469	0.582	1
Stk40	0.0849925	0.964641	0.214	0.109	1
Gca	0.0850994	1.36138	0.122	0.036	1
Tspan12	0.0850994	0.867374	0.122	0.036	1
Chd1l	0.0850994	-1.34034	0.061	0.145	1
Gmfg	0.0850994	-0.646119	0.061	0.145	1
Elp4	0.0851036	0.560224	0.378	0.236	1
Brms1l	0.0851459	0.672784	0.204	0.091	1
Nrxn2	0.0851958	0.567238	0.592	0.436	1
Fxyd2	0.0852493	1.47097	0.194	0.091	1
Lman2l	0.0853132	0.639202	0.531	0.418	1
Rfc3	0.0856017	-0.987495	0.388	0.455	1
Cst6	0.0858271	1.56692	0.143	0.055	1
Ldb1	0.0858884	0.346838	0.612	0.436	1
Ttc38	0.0859266	-0.126836	0.092	0.018	1
Mecp2	0.0859705	0.429964	0.449	0.309	1
Ank3	0.0860086	0.448154	0.765	0.636	1
Strip1	0.086015	0.733349	0.296	0.164	1
Chic2	0.0861246	0.243289	0.878	0.782	1
Diablo	0.0864827	0.468034	0.776	0.655	1
Itpkc	0.0864859	0.632291	0.122	0.036	1
Clip1	0.0865516	-1.01339	0.163	0.273	1
Kctd2	0.0865867	0.541253	0.459	0.309	1
Eea1	0.0866254	0.797697	0.286	0.164	1
Hnrnpf	0.0866883	-0.480962	0.939	0.927	1
Ciz1	0.0867789	0.742622	0.357	0.218	1
Eif1b	0.0868259	-0.397235	0.867	0.909	1
Tubb3	0.0869021	0.253607	0.908	0.836	1
Magoh	0.0869415	-0.327246	0.755	0.8	1
Bag6	0.0871825	0.450721	0.541	0.4	1
Smim10l1	0.0872101	0.411546	0.571	0.4	1
Mgst3	0.0872172	0.357693	0.908	0.818	1
Cct6a	0.0872853	0.348247	0.918	0.873	1
Syap1	0.0872997	0.989278	0.306	0.182	1
Kmt2e	0.0873008	0.36496	0.786	0.709	1
Hcfc1	0.0875434	0.533338	0.49	0.345	1
Slc3a2	0.0877506	-0.625602	0.622	0.673	1
Nyap1	0.0878906	0.918413	0.122	0.036	1
Arhgef11	0.088062	0.830798	0.224	0.109	1
Kirrel2	0.0884007	1.32315	0.143	0.036	1
Usp22	0.0884787	0.570273	0.541	0.418	1
Gfm1	0.0885026	1.24281	0.286	0.164	1
Trim35	0.0885555	0.308159	0.745	0.564	1
Fam129b	0.0885596	0.711671	0.245	0.127	1
Mef2d	0.0885596	0.585433	0.245	0.127	1
Pdhx	0.0885704	0.993373	0.194	0.091	1
Pus10	0.0887014	0.769781	0.153	0.055	1
Zfp740	0.0887992	0.97929	0.296	0.164	1
Zfr	0.0889716	0.675289	0.459	0.309	1
Zfp26	0.0889818	0.820639	0.265	0.145	1
Slc12a2	0.0891598	0.864905	0.327	0.182	1
Clic6	0.089213	0.784753	0.388	0.273	1
Ube2o	0.0892161	0.475657	0.51	0.4	1
St3gal4	0.0892179	-1.85404	0.041	0.109	1
Mef2a	0.0892855	-0.738382	0.255	0.382	1
Malt1	0.0893136	-1.91431	0.092	0.182	1
Mea1	0.0893332	-0.45072	0.418	0.545	1
Pnisr	0.0894468	0.431789	0.806	0.673	1
Prdx4	0.0894896	0.405935	0.755	0.6	1
Orc5	0.0895063	-1.55255	0.112	0.2	1
Eif4enif1	0.0895264	0.333761	0.429	0.273	1
March8	0.0895517	0.947579	0.449	0.345	1
Tiam1	0.0895776	-0.773772	0.163	0.273	1
Glt28d2	0.0896289	1.81737	0.163	0.073	1
Emc2	0.089648	0.488002	0.582	0.455	1
Reep3	0.0897432	-0.624833	0.204	0.327	1
Cd24a	0.0898195	1.24926	0.347	0.236	1
Trmt112	0.0898955	-0.596895	0.786	0.8	1
Acad10	0.0899676	1.13104	0.265	0.145	1
Fam118a	0.089982	-0.58958	0.082	0.182	1
Osbpl2	0.0900363	0.837792	0.276	0.164	1
Kcnk10	0.0900503	0.902757	0.276	0.145	1
Zfp672	0.0900647	0.935419	0.306	0.182	1
Ndufv1	0.0900652	0.335455	0.786	0.636	1
Rccd1	0.090285	-0.790345	0.102	0.2	1
Nek9	0.0903007	1.30951	0.214	0.109	1
Ap4s1	0.0903507	0.495698	0.429	0.255	1
Mef2c	0.0905711	-1.43134	0.092	0.182	1
Lyn	0.0905749	-1.49173	0.051	0.127	1
Cnn2	0.0905749	-0.992854	0.051	0.127	1
Ctss	0.0905749	-3.21279	0.051	0.109	1
Lmna	0.0907076	0.582927	0.337	0.2	1
Acp6	0.0907552	0.749597	0.122	0.036	1
Cdca7l	0.0907552	-1.85371	0.061	0.145	1
Vmn2r36	0.0907772	-0.709887	0.01	0	1
Spag16	0.0908057	1.43673	0.051	0	1
Plcd4	0.0908057	1.3137	0.051	0	1
Crocc2	0.0908057	1.39782	0.051	0	1
Etnk2	0.0908057	1.11247	0.051	0	1
Slc19a2	0.0908057	1.60999	0.051	0	1
Disp1	0.0908057	1.56607	0.051	0	1
Mettl15	0.0908057	1.21213	0.051	0	1
Hs6st2	0.0908057	1.69396	0.051	0	1
Zc3h12b	0.0908057	1.28972	0.051	0	1
Pof1b	0.0908057	0.869469	0.051	0	1
Fndc3b	0.0908057	1.02921	0.051	0	1
Mtmr11	0.0908057	0.912547	0.051	0	1
St6galnac5	0.0908057	1.25128	0.051	0	1
Gng10	0.0908057	1.28957	0.051	0	1
Sema3e	0.0908057	0.878644	0.051	0	1
Zfp956	0.0908057	1.00504	0.051	0	1
Rassf8	0.0908057	1.32913	0.051	0	1
Zfp575	0.0908057	1.17527	0.051	0	1
Zfp607b	0.0908057	0.760306	0.051	0	1
Zfp383	0.0908057	1.23129	0.051	0	1
Zfp658	0.0908057	1.35474	0.051	0	1
Il18bp	0.0908057	1.22268	0.051	0	1
Zfp689	0.0908057	0.930439	0.051	0	1
Ccdc170	0.0908057	1.58559	0.051	0	1
BC024063	0.0908057	1.17513	0.051	0	1
Ogfod1	0.0908057	0.884857	0.051	0	1
S1pr2	0.0908057	1.23869	0.051	0	1
Mcam	0.0908057	2.06999	0.051	0	1
Smad6	0.0908057	1.09573	0.051	0	1
Dnaaf4	0.0908057	1.67438	0.051	0	1
Minar1	0.0908057	1.11071	0.051	0	1
Hyal3	0.0908057	1.17336	0.051	0	1
D930048N14Rik	0.0908057	1.02284	0.051	0	1
Gemin4	0.0908057	2.30362	0.051	0	1
1810010H24Rik	0.0908057	1.58346	0.051	0	1
H2ac13	0.0908057	1.38227	0.051	0	1
Fgd3	0.0908057	3.12293	0.051	0	1
Pfn4	0.0908057	1.24464	0.051	0	1
Samd15	0.0908057	1.18115	0.051	0	1
Plaat1	0.0908057	1.44356	0.051	0	1
Eaf2	0.0908057	1.23336	0.051	0	1
Spaca6	0.0908057	1.21189	0.051	0	1
H2-M10.3	0.0908057	1.09684	0.051	0	1
Togaram2	0.0908057	1.27024	0.051	0	1
Cables1	0.0908057	1.70256	0.051	0	1
Pcdhac1	0.0908057	1.1585	0.051	0	1
Pcdhga11	0.0908057	1.73609	0.051	0	1
Cyp2f2	0.0908057	2.29142	0.041	0	1
Tmem191c	0.090862	1.36254	0.163	0.073	1
Hdac8	0.0908907	0.897396	0.173	0.073	1
Lats1	0.0909119	0.832207	0.388	0.273	1
Zswim8	0.0909119	0.708067	0.388	0.273	1
Atp5a1	0.0910029	0.14136	0.98	0.927	1
Nphp4	0.0910361	1.18635	0.143	0.055	1
Upf1	0.0910959	-0.854008	0.388	0.545	1
Snap25	0.0911914	0.295846	0.418	0.273	1
Gins1	0.0913797	-0.967069	0.204	0.309	1
Pus1	0.0915951	-0.906575	0.265	0.382	1
Hmgb1	0.091742	-0.203222	1	1	1
Sp4	0.0918042	0.756667	0.327	0.2	1
Fto	0.0918984	0.86937	0.48	0.382	1
Mrpl33	0.0919233	-0.430116	0.888	0.909	1
Dnajc12	0.0921118	0.946219	0.173	0.073	1
Slfn2	0.0921398	-1.5285	0.051	0.127	1
Cyth4	0.0921398	-1.83937	0.051	0.127	1
Nsmce2	0.0921773	0.48935	0.663	0.6	1
Pogk	0.0924402	0.130281	0.449	0.309	1
Tiparp	0.0924532	0.73943	0.388	0.255	1
Sdc3	0.0924934	0.868156	0.347	0.236	1
Gatc	0.0925002	1.21108	0.204	0.109	1
Phldb1	0.0925002	1.65329	0.204	0.109	1
Pclaf	0.0925347	-0.547105	0.378	0.491	1
Cd48	0.0926099	-2.11065	0.041	0.109	1
Egr2	0.0926099	-1.90893	0.041	0.109	1
Cks2	0.0926482	-0.677417	0.52	0.6	1
Meis2	0.0927189	-0.300456	0.592	0.436	1
Dido1	0.0928541	0.562807	0.408	0.273	1
Borcs6	0.092917	0.878432	0.306	0.2	1
Wdr31	0.0929836	1.14021	0.276	0.164	1
D230025D16Rik	0.0931289	-1.24661	0.092	0.182	1
Tceal8	0.0933632	0.318393	0.561	0.418	1
Lrrc8a	0.0934414	0.695924	0.224	0.109	1
Atp2b1	0.0934631	0.450806	0.765	0.709	1
Tacc1	0.0934641	0.778452	0.337	0.2	1
Cbr2	0.0934751	4.06199	0.184	0.055	1
Glcci1	0.0937263	-1.35127	0.051	0.127	1
Ctsc	0.0937263	-2.29197	0.051	0.127	1
Kctd16	0.0937344	1.33414	0.143	0.055	1
Impdh1	0.0937873	0.541227	0.612	0.509	1
Bcorl1	0.0939951	1.42897	0.112	0.036	1
Bicd1	0.0940128	0.555882	0.439	0.291	1
Dck	0.0941173	0.447279	0.449	0.309	1
Ftsj1	0.0943367	0.889364	0.194	0.091	1
Zfp574	0.0943367	0.88587	0.194	0.091	1
Dock10	0.0943443	-1.87844	0.041	0.109	1
Ptprc	0.0943443	-1.94885	0.041	0.109	1
Kdm4a	0.0943487	0.578337	0.316	0.182	1
Errfi1	0.0943977	0.583023	0.337	0.2	1
Khsrp	0.0944595	-0.657416	0.459	0.582	1
Fbxo36	0.0945488	0.1893	0.265	0.145	1
Rufy3	0.0945653	0.609253	0.622	0.491	1
Psmb1	0.0946746	-0.364558	0.929	0.964	1
Brwd3	0.0947747	-0.798181	0.133	0.236	1
Brdt	0.0951074	1.44752	0.143	0.055	1
Klhl2	0.0951074	1.95966	0.143	0.055	1
Trmt11	0.0951074	-1.53925	0.082	0.164	1
Cox7a2l	0.0953056	0.233611	0.918	0.873	1
Eif1ax	0.0953059	-0.35669	0.816	0.836	1
Osbpl1a	0.0953388	1.30249	0.316	0.218	1
Rpl34	0.0954611	-0.120254	1	1	1
Fam111a	0.0955725	-0.588999	0.184	0.309	1
Ppp1r13b	0.0956657	0.77976	0.224	0.109	1
Polr3c	0.0957145	0.741758	0.316	0.2	1
Sin3b	0.0958455	0.404698	0.837	0.764	1
Tkt	0.0958621	0.358718	0.673	0.545	1
Fbxo34	0.096069	0.716408	0.265	0.145	1
Csgalnact2	0.0961047	-1.39346	0.041	0.109	1
mt-Nd4l	0.0963404	-0.571125	0.806	0.836	1
Vps53	0.096349	0.325416	0.408	0.273	1
Rnf227	0.0964193	0.736578	0.5	0.418	1
Clip3	0.096445	0.352666	0.459	0.309	1
Aimp1	0.0964863	0.136137	0.857	0.709	1
Rnf123	0.0964964	1.38261	0.143	0.055	1
Foxn1	0.0964964	1.10506	0.143	0.055	1
Ccnt1	0.0965961	0.374511	0.439	0.291	1
Kpnb1	0.0966328	0.252052	0.551	0.455	1
Eef1akmt1	0.0966416	-0.655546	0.51	0.6	1
Zbtb20	0.0966775	0.564057	0.622	0.473	1
Mboat7	0.0967095	-0.379554	0.061	0.145	1
Sec22c	0.0967258	1.10987	0.194	0.091	1
Dcaf10	0.0968602	1.51381	0.184	0.091	1
Krt10	0.0969043	0.602567	0.602	0.473	1
Gpatch2	0.0970332	0.408756	0.286	0.145	1
H2-Eb1	0.0970388	-2.16973	0.133	0.091	1
Bod1	0.0971065	0.207808	0.847	0.764	1
Arhgef18	0.0971284	0.724478	0.173	0.073	1
Zfp639	0.0971489	0.585024	0.429	0.291	1
Cnot6	0.0972214	0.347587	0.684	0.491	1
Zfp622	0.0972389	0.615832	0.408	0.273	1
Spef1	0.0972435	0.449251	0.337	0.2	1
Lnpep	0.0973262	0.893275	0.367	0.255	1
Ccl2	0.0974029	-3.87697	0	0.055	1
Ccl12	0.0974029	-1.60975	0	0.055	1
Dab2	0.0974029	-2.39056	0	0.055	1
Lax1	0.0974029	-3.09378	0.01	0.055	1
Ggta1	0.0974029	-1.84364	0.01	0.055	1
Olfr1124	0.0974029	-2.34141	0.01	0.055	1
Slc30a4	0.0974029	-2.05287	0.01	0.055	1
Sash3	0.0974029	-2.43977	0.01	0.055	1
Gm6377	0.0974029	-2.84125	0.01	0.055	1
Glra2	0.0974029	-1.96717	0.01	0.055	1
Mob3c	0.0974029	-2.04986	0.01	0.055	1
Chd5	0.0974029	-2.19412	0.01	0.055	1
Txk	0.0974029	-2.50447	0.01	0.055	1
Pira2	0.0974029	-1.83545	0.01	0.055	1
Rnf225	0.0974029	-2.23	0.01	0.055	1
Ffar2	0.0974029	-2.38831	0.01	0.055	1
Btbd11	0.0974029	-1.86052	0.01	0.055	1
Lrrc25	0.0974029	-2.35893	0.01	0.055	1
Kctd4	0.0974029	-2.67476	0.01	0.055	1
Lacc1	0.0974029	-1.94181	0.01	0.055	1
Ccr1	0.0974029	-2.92546	0.01	0.055	1
Ikzf3	0.0974029	-2.51248	0.01	0.055	1
Pou5f2	0.0974029	-2.05687	0.01	0.055	1
Rab31	0.0974029	-1.82604	0.01	0.055	1
Gstp3	0.0974029	-2.89824	0.01	0.055	1
Fam89b	0.0974029	-2.23419	0.01	0.055	1
Slc25a45	0.0974029	-2.15129	0.01	0.055	1
Ywhab	0.0974879	0.296464	0.888	0.764	1
Plppr2	0.0975977	-0.109602	0.204	0.091	1
Dmpk	0.0976565	0.988328	0.316	0.2	1
Rplp1	0.0977498	-0.211371	0.99	1	1
Bysl	0.0977705	-0.651294	0.102	0.2	1
Gpr183	0.0978913	-1.8614	0.041	0.109	1
Mettl22	0.0979016	1.10553	0.143	0.055	1
Nutf2-ps1	0.0979016	-0.928202	0.082	0.164	1
Mllt10	0.0980052	0.526467	0.602	0.491	1
Idh1	0.0980816	0.483435	0.531	0.364	1
Sh3gl1	0.0982029	0.520318	0.541	0.455	1
Ptpn11	0.098253	0.535017	0.316	0.182	1
1700021F05Rik	0.0983737	1.05274	0.337	0.218	1
Rgs11	0.0983924	0.890692	0.357	0.255	1
Pcgf1	0.0984161	0.542626	0.173	0.073	1
C87436	0.0984724	0.929677	0.347	0.218	1
Trpc4ap	0.0985563	0.495638	0.418	0.291	1
Ak2	0.098624	-0.616601	0.347	0.473	1
Lrch2	0.0987176	1.38211	0.112	0.036	1
2510009E07Rik	0.0987176	1.42051	0.112	0.036	1
Polr3a	0.0987188	-0.813703	0.112	0.218	1
Plekha6	0.0988554	0.418663	0.347	0.2	1
Gpx4	0.0988868	0.251354	0.969	0.909	1
Nedd1	0.0989448	0.71488	0.245	0.145	1
Synrg	0.0990884	0.376465	0.571	0.418	1
Nfkbia	0.0990884	0.541824	0.571	0.418	1
Ints14	0.0991631	1.75262	0.194	0.091	1
Bmpr2	0.0991816	0.647837	0.367	0.255	1
Gapvd1	0.0992121	0.363685	0.5	0.382	1
Omp	0.0992411	1.97628	0.184	0.091	1
Svip	0.0992415	0.635559	0.265	0.145	1
Riox1	0.0993232	1.35478	0.143	0.055	1
Fra10ac1	0.0993579	0.521732	0.541	0.436	1
Tubgcp3	0.0994207	0.92379	0.286	0.164	1
Neu1	0.0994207	0.846537	0.286	0.164	1
Celf3	0.0994835	0.430234	0.643	0.545	1
Smo	0.0997043	-1.29953	0.041	0.109	1
Gm17018	0.0997397	0.576874	0.592	0.491	1
Cep70	0.0997751	0.514784	0.551	0.418	1
Tob2	0.0999098	-0.960842	0.296	0.4	1
Sulf2	0.0999736	-0.647327	0.112	0.218	1
Cdkn2a	0.100213	-2.33584	0.01	0.055	1
Chst13	0.100213	-2.05255	0.01	0.055	1
Mcemp1	0.100213	-2.25922	0.01	0.055	1
Ttc12	0.100213	-2.03601	0.01	0.055	1
Bcl2a1a	0.100213	-2.19966	0.01	0.055	1
Cx3cr1	0.100213	-3.66205	0.01	0.055	1
Ccr2	0.100213	-2.86185	0.01	0.055	1
Pik3cg	0.100213	-2.13348	0.01	0.055	1
H2-Oa	0.100213	-2.27544	0.01	0.055	1
Sorcs3	0.100213	-2.081	0.01	0.055	1
Nck2	0.100238	1.01859	0.255	0.145	1
Jmjd1c	0.100276	0.458886	0.48	0.364	1
Msl1	0.100358	0.495957	0.51	0.382	1
Fbxo28	0.100464	0.852687	0.286	0.164	1
Pcsk1n	0.100525	0.978324	0.214	0.109	1
Gpatch8	0.100533	0.261739	0.684	0.509	1
Espn	0.100579	-0.482158	0.296	0.418	1
Psmb9	0.100657	-0.283563	0.133	0.236	1
Cdkn1a	0.100754	0.576498	0.714	0.618	1
Il2rg	0.100775	-2.0259	0.031	0.091	1
H2-M3	0.100775	-1.90598	0.031	0.091	1
Ptk2	0.10082	0.418361	0.398	0.273	1
Lsm6	0.101002	-0.29671	0.816	0.891	1
Clstn2	0.101152	0.365403	0.255	0.127	1
Pkn2	0.101208	0.466622	0.622	0.509	1
Msh6	0.101544	-0.813286	0.163	0.255	1
Arnt	0.101903	-1.47642	0.112	0.2	1
Mpc1	0.102131	0.38807	0.918	0.8	1
C77080	0.102216	0.993623	0.143	0.055	1
Tmem143	0.102216	0.915174	0.143	0.055	1
March1	0.102317	-2.18317	0.02	0.073	1
Fnbp4	0.102359	-0.265075	0.255	0.4	1
Rnps1	0.102416	0.257086	0.857	0.782	1
Ebf2	0.102422	0.310478	0.816	0.655	1
Ttc8	0.10246	0.652492	0.388	0.255	1
Dapp1	0.102543	-0.759208	0.163	0.273	1
Fyttd1	0.1026	0.35167	0.663	0.491	1
Uxt	0.102683	-0.436439	0.306	0.436	1
Dot1l	0.102774	0.483239	0.5	0.364	1
Ptk2b	0.102837	-1.74529	0.031	0.091	1
Ms4a6c	0.102837	-2.47191	0.031	0.091	1
Rab22a	0.102855	0.134381	0.49	0.364	1
Pak2	0.103024	-0.562333	0.755	0.745	1
Ifi213	0.103088	-1.65036	0.01	0.055	1
Mid2	0.103088	-1.68299	0.01	0.055	1
Sh2d2a	0.103088	-2.24996	0.01	0.055	1
Zfp619	0.103088	-1.65197	0.01	0.055	1
Prss50	0.103088	-2.05338	0.01	0.055	1
Skap1	0.103088	-1.80925	0.01	0.055	1
Mpp3	0.103088	-1.67567	0.01	0.055	1
Vmn1r34	0.103088	-2.0308	0.01	0.036	1
Mrpl22	0.103206	-0.59883	0.429	0.545	1
Yeats2	0.103341	0.766937	0.347	0.218	1
Usp14	0.103386	-1.08551	0.439	0.509	1
Ptpdc1	0.103386	1.0396	0.296	0.182	1
Lmbrd2	0.103398	-1.11913	0.173	0.273	1
Gstk1	0.103411	-1.16638	0.041	0.109	1
Strada	0.103411	-1.02483	0.041	0.109	1
Ndufa3	0.103621	0.31959	0.878	0.836	1
Qsox1	0.103628	1.42112	0.112	0.036	1
Bmf	0.103628	1.0627	0.112	0.036	1
Txnl1	0.103696	-0.413906	0.806	0.764	1
Brat1	0.103737	1.77894	0.082	0.018	1
Sec14l3	0.103737	1.53669	0.082	0.018	1
Foxo4	0.103958	1.03789	0.163	0.073	1
Parp6	0.1041	0.247946	0.551	0.436	1
Pik3r4	0.104132	1.14407	0.214	0.109	1
[truncated: 10,349 more rows]

## Sheet: 6 Macrophage-male vs female
Gene	p value	Average log2 fold change	Fraction of cells expressing the gene in male cluster	Fraction of cells expressing the gene in female cluster	Adjusted p value
Ddx3y	2.67622e-13	6.39252	0.405	0	5.84888e-09
Eif2s3y	1.15586e-12	5.86548	0.387	0	2.52614e-08
Zfp36l1	3.59935e-07	1.20662	0.802	0.505	0.00786638
Rps10	3.69227e-07	-0.467409	0.973	0.963	0.00806947
Ubc	5.4277e-07	0.77717	0.964	0.804	0.0118622
Cd83	3.23372e-06	1.18597	0.766	0.533	0.070673
Tsc22d3	4.83243e-06	0.932698	0.631	0.318	0.105613
Pnrc1	1.33053e-05	0.642657	0.892	0.776	0.290787
Cxcr4	2.07941e-05	1.59578	0.486	0.215	0.454455
Serinc3	4.24569e-05	0.875177	0.784	0.486	0.927895
Kmt2a	4.93629e-05	1.44064	0.441	0.187	1
Atp5l	4.95935e-05	-0.465899	0.964	0.953	1
Ifrd1	8.61154e-05	1.12628	0.73	0.505	1
Tmem256	8.68573e-05	-1.00659	0.658	0.804	1
Mylip	9.39859e-05	2.08578	0.315	0.112	1
Mbd2	0.00010452	0.827567	0.712	0.486	1
Srsf2	0.000118291	0.652787	0.793	0.654	1
Ppp1r10	0.000133862	1.33951	0.532	0.29	1
Uba52	0.000173464	0.579792	0.865	0.785	1
Lnpep	0.000178387	1.14862	0.523	0.271	1
Nfu1	0.000178462	-1.17033	0.36	0.561	1
Cd52	0.000187557	-0.506281	0.964	1	1
Rtn3	0.000189091	1.23402	0.468	0.224	1
Kctd12	0.000223462	0.897985	0.721	0.505	1
Apobec3	0.000231055	1.03096	0.694	0.477	1
Sertad1	0.000234762	1.28986	0.405	0.178	1
Vcp	0.000277405	0.595836	0.694	0.486	1
Adcy7	0.000315574	1.21952	0.369	0.15	1
Pdxk	0.000323774	2.06365	0.243	0.065	1
Pdcd4	0.000332068	0.956171	0.631	0.383	1
Per1	0.000366634	1.03112	0.505	0.262	1
Tob2	0.000374933	0.869299	0.622	0.402	1
Erp44	0.000384169	1.31987	0.486	0.262	1
Nisch	0.00038818	1.00503	0.514	0.271	1
Fam107b	0.000409874	0.608354	0.55	0.29	1
Picalm	0.00043519	0.707964	0.748	0.589	1
Dusp1	0.000462488	1.07585	0.766	0.692	1
Kif5b	0.000523211	0.719423	0.73	0.495	1
Gpcpd1	0.000626218	1.10323	0.532	0.346	1
Cbr1	0.000641702	2.50384	0.18	0.037	1
Plekhm3	0.000654923	1.44883	0.423	0.206	1
Gm2000	0.000656133	-0.775114	0.586	0.738	1
Selenot	0.000668608	0.999304	0.514	0.29	1
H2-Q4	0.00068996	1.20308	0.432	0.224	1
Abhd12	0.000734226	1.02989	0.423	0.224	1
BC005537	0.000745077	0.548803	0.649	0.402	1
Tnfrsf1a	0.000779437	0.93412	0.486	0.262	1
Cog2	0.000780958	1.89769	0.198	0.047	1
Gpr65	0.000788351	1.28505	0.459	0.243	1
Skp1a	0.000788907	0.770242	0.577	0.336	1
Pxmp4	0.000802445	1.91726	0.198	0.047	1
Trpv2	0.000803715	1.20803	0.387	0.178	1
Eef1a1	0.000805981	0.235262	1	1	1
Lmbrd1	0.000843777	1.13049	0.387	0.178	1
Cd86	0.000862917	1.0242	0.604	0.393	1
Iqgap1	0.000865255	0.615316	0.838	0.664	1
Gpr55	0.000869281	4.01889	0.099	0	1
Ocrl	0.000869281	3.25054	0.099	0	1
Cyp4v3	0.000890104	2.13875	0.162	0.028	1
Uqcr10	0.000954042	-0.541227	0.775	0.85	1
Pik3r1	0.00099584	1.22463	0.405	0.196	1
Sbds	0.00101171	0.796144	0.568	0.327	1
Mef2d	0.00102773	1.26581	0.423	0.206	1
Vps29	0.001043	-1.01869	0.495	0.654	1
Lemd2	0.00104763	1.26345	0.36	0.168	1
S100a6	0.00105618	-0.741435	0.838	0.869	1
Tec	0.0010754	1.54837	0.243	0.075	1
Mrpl18	0.00107649	-1.41736	0.36	0.551	1
Neurl3	0.00110698	0.98163	0.532	0.318	1
Junb	0.00110778	0.457497	0.937	0.841	1
Kdm6b	0.00121236	0.800317	0.721	0.57	1
Pi4k2b	0.00126195	2.35128	0.189	0.047	1
Btg2	0.00127213	0.497849	0.919	0.794	1
Sqstm1	0.00133334	0.97728	0.559	0.346	1
Gadd45b	0.00135614	0.694431	0.667	0.449	1
Zfand5	0.00140401	0.934133	0.721	0.561	1
Cyb5r1	0.00143012	2.2433	0.207	0.065	1
Tbc1d14	0.00144494	1.77032	0.252	0.093	1
Icam1	0.00151303	1.06506	0.441	0.234	1
Pstpip1	0.00157978	1.2096	0.405	0.206	1
Antxr2	0.00162003	1.60026	0.288	0.121	1
Nfkbia	0.00174649	0.483514	0.838	0.692	1
Fes	0.00187408	0.986522	0.441	0.243	1
Dennd5a	0.00192774	0.854921	0.505	0.28	1
Itgb1	0.00200684	0.707292	0.703	0.533	1
Zfc3h1	0.00201144	1.77916	0.234	0.084	1
Hexim1	0.00203813	1.92041	0.27	0.112	1
Spi1	0.0020469	-0.683642	0.82	0.841	1
Itga4	0.00209041	0.812811	0.685	0.495	1
Crem	0.00211109	1.36867	0.315	0.14	1
H2-T23	0.00212799	0.278909	0.874	0.738	1
Kif21b	0.00216369	1.41627	0.297	0.131	1
Rnf19b	0.00227395	0.891582	0.477	0.262	1
Oas1g	0.00238034	2.61974	0.144	0.028	1
Tnks2	0.00241888	1.20388	0.315	0.14	1
Manbal	0.00248363	1.35243	0.27	0.112	1
Ythdf3	0.00257825	1.01479	0.306	0.131	1
Adam19	0.00259872	0.764499	0.279	0.121	1
Synj1	0.00262619	0.80714	0.541	0.355	1
Klf13	0.00264223	0.657182	0.631	0.449	1
Pmaip1	0.00264461	0.777907	0.667	0.505	1
Nostrin	0.00269351	1.10198	0.369	0.196	1
Gprc5a	0.00272383	2.99585	0.081	0	1
Sowahc	0.00280991	0.905192	0.432	0.224	1
Dock5	0.00285953	1.69984	0.288	0.131	1
Tgif1	0.00289532	0.955526	0.595	0.383	1
Gtpbp2	0.00293143	1.77211	0.279	0.121	1
Snap23	0.00296899	0.861236	0.523	0.327	1
Midn	0.00299215	0.923942	0.423	0.234	1
Nuak2	0.00302811	1.06739	0.45	0.28	1
Tnks	0.00305238	1.25551	0.324	0.159	1
Gypc	0.00305356	2.85391	0.153	0.037	1
Cpne3	0.00306981	0.946816	0.369	0.187	1
Mrpl15	0.0031022	-0.974646	0.387	0.542	1
Ppp4r2	0.0031802	0.728831	0.459	0.262	1
Cytip	0.00319606	0.497905	0.892	0.794	1
Snrpg	0.00327374	-0.388534	0.955	0.925	1
Higd1a	0.00330227	-0.741926	0.568	0.682	1
Filip1l	0.00335862	0.94439	0.568	0.393	1
Ubb	0.00339242	0.337311	1	0.991	1
Fam120a	0.00341252	0.968132	0.378	0.196	1
Jdp2	0.00348795	1.32039	0.261	0.103	1
Sdha	0.00348951	0.933783	0.459	0.252	1
Sgms1	0.00350476	1.2689	0.324	0.159	1
Smg7	0.00352469	2.15385	0.207	0.075	1
R3hdm4	0.00353776	0.811699	0.559	0.411	1
Hmgb2	0.00354888	0.470549	0.775	0.617	1
Nr4a1	0.00356161	0.619907	0.811	0.626	1
Pcyt2	0.00361991	1.15027	0.315	0.15	1
Cd99l2	0.0036444	2.47006	0.099	0.009	1
Hdac11	0.0036444	2.15524	0.09	0.009	1
Arid4a	0.00374861	0.329883	0.577	0.383	1
Irak4	0.0037535	1.64607	0.225	0.084	1
Nsmaf	0.00376434	1.25006	0.36	0.187	1
Tpr	0.00379733	0.619723	0.748	0.626	1
Mrps15	0.00385101	-1.02054	0.423	0.551	1
Plk3	0.00390044	1.20259	0.297	0.15	1
Jag2	0.00391977	2.22747	0.135	0.028	1
Rpl41	0.0039996	-0.186961	1	1	1
Ndufc2	0.00400704	-0.537376	0.73	0.841	1
Rap2a	0.00401436	1.5847	0.315	0.159	1
Slc35b2	0.00414373	1.13029	0.261	0.103	1
Rheb	0.00414924	0.321243	0.838	0.71	1
Mmd	0.00418479	1.79008	0.18	0.056	1
Ccdc12	0.00420776	-0.723801	0.802	0.85	1
Trmt1l	0.00423092	1.50941	0.198	0.065	1
Zyx	0.00424387	0.717917	0.631	0.486	1
Uqcrq	0.00425425	-0.481512	0.883	0.86	1
Slc35a3	0.00427132	1.75087	0.153	0.037	1
Arhgef10	0.00439194	2.06176	0.135	0.028	1
Strip2	0.00439881	2.56999	0.162	0.047	1
S100a11	0.00440994	-0.442223	0.883	0.925	1
Emc9	0.00441402	1.19313	0.288	0.131	1
Tent2	0.00446278	0.866316	0.468	0.29	1
Ift22	0.00458199	-1.03332	0.18	0.346	1
Slc12a2	0.00462667	3.25693	0.144	0.047	1
Wasf2	0.00475188	0.53281	0.667	0.542	1
Ubtf	0.00482425	1.13963	0.396	0.224	1
Zc3h10	0.00487108	1.45279	0.153	0.037	1
Ndufa2	0.00488773	-0.702055	0.838	0.86	1
Rpl4	0.00488867	0.35987	0.928	0.822	1
Pdcd5	0.00494557	-0.585477	0.577	0.701	1
Asah1	0.00495134	0.41821	0.739	0.617	1
Gmppb	0.00514449	1.29254	0.27	0.121	1
C330007P06Rik	0.00518679	1.53073	0.18	0.056	1
Slco3a1	0.00523745	0.211698	0.306	0.14	1
Dusp2	0.00525016	0.812851	0.505	0.327	1
Mafk	0.00527457	0.975057	0.306	0.15	1
Ctdsp1	0.00533778	-1.44044	0.108	0.243	1
Chchd1	0.0054054	-0.884156	0.495	0.598	1
Uimc1	0.00556086	1.20433	0.405	0.234	1
Ints12	0.00556604	0.97443	0.225	0.084	1
Mlxip	0.00556612	1.41715	0.18	0.056	1
Timm10b	0.0058038	-0.571094	0.703	0.794	1
Gdi1	0.00581749	0.697459	0.333	0.159	1
Fam98b	0.00583679	0.920278	0.261	0.112	1
Phlpp1	0.00593395	1.27704	0.27	0.131	1
B9d1	0.0059834	2.47902	0.126	0.028	1
Mtss1	0.00598895	-2.85206	0.036	0.14	1
Stk24	0.00601799	0.771824	0.523	0.327	1
Agpat4	0.0061756	1.28555	0.468	0.318	1
Ikzf5	0.00623319	1.46035	0.162	0.047	1
Akap9	0.00629487	1.20243	0.423	0.271	1
Pex13	0.00638017	1.10131	0.315	0.159	1
Uqcrb	0.00640829	-0.53213	0.847	0.85	1
Poldip3	0.00642208	1.06569	0.333	0.168	1
Nr4a2	0.00655482	0.86325	0.631	0.458	1
Eefsec	0.0067125	1.27559	0.216	0.084	1
Grasp	0.0067175	0.896078	0.523	0.364	1
Cetn4	0.00684215	1.66062	0.144	0.037	1
Wbp11	0.00684326	0.882719	0.55	0.393	1
Hspe1	0.00688292	-0.550237	0.829	0.869	1
Rpl36al	0.00692919	-0.419124	0.901	0.897	1
A130010J15Rik	0.00702828	2.31604	0.09	0.009	1
Rps4x	0.00711687	-0.197592	1	0.991	1
Zfp516	0.00716538	1.08067	0.369	0.206	1
Calb2	0.00718271	0.910814	0.072	0.056	1
Ubfd1	0.0071949	0.936904	0.306	0.15	1
Higd2a	0.00726888	-0.763919	0.64	0.701	1
Phf20l1	0.00736336	1.21566	0.324	0.168	1
Ncoa7	0.00736516	1.31679	0.468	0.318	1
Dock8	0.00736925	0.641168	0.523	0.346	1
Bnip3l	0.00742896	0.442944	0.595	0.43	1
Prcp	0.00744255	0.614041	0.613	0.449	1
Yipf2	0.0075513	2.21135	0.108	0.019	1
Ncor2	0.00756697	1.64853	0.279	0.14	1
Cox5b	0.00757434	-0.355959	0.919	0.925	1
Foxn3	0.00766796	1.05452	0.468	0.29	1
Taldo1	0.00769474	-0.292007	0.874	0.907	1
Cyth1	0.00775133	0.867972	0.342	0.178	1
Atp5j2	0.0077647	-0.260855	0.928	0.897	1
Agpat3	0.00781654	0.514141	0.324	0.159	1
Snrpc	0.00783738	0.561283	0.568	0.43	1
Gng5	0.00793427	-0.233972	0.973	0.963	1
Trim8	0.00811052	0.636993	0.477	0.29	1
Card19	0.00811584	-1.14161	0.387	0.514	1
Tm4sf5	0.008262	2.20504	0.108	0.019	1
Gosr2	0.00847027	-1.14828	0.315	0.458	1
Asb1	0.00852989	2.70982	0.063	0	1
Uty	0.00852989	3.51071	0.063	0	1
Vps4b	0.0085613	1.04909	0.414	0.271	1
Plcb4	0.00857424	1.61142	0.126	0.028	1
Specc1	0.0086405	1.63848	0.288	0.15	1
Cenpv	0.00876886	1.44637	0.216	0.093	1
Atp13a2	0.00895951	1.3501	0.207	0.084	1
Ric1	0.00897906	1.1139	0.198	0.075	1
Sppl2a	0.00903901	0.484096	0.568	0.402	1
Pik3ap1	0.0091152	0.780374	0.495	0.318	1
Fkbp5	0.0091446	2.20348	0.198	0.084	1
Nfkbie	0.00916428	1.16787	0.36	0.215	1
Rnf169	0.00918229	1.9109	0.153	0.047	1
Procr	0.00928893	2.50555	0.18	0.065	1
Clk1	0.00935728	0.797493	0.676	0.505	1
Irak1	0.00936896	0.418924	0.477	0.308	1
Sec22b	0.00942806	1.5688	0.252	0.121	1
Mpeg1	0.00943791	0.652979	0.595	0.43	1
Emd	0.00944145	0.886937	0.505	0.308	1
Tmcc3	0.00950388	1.52356	0.288	0.15	1
Il12b	0.00950422	1.193	0.171	0.056	1
Rpl35a	0.00964716	-0.169915	1	1	1
Ubl3	0.00978644	0.794632	0.622	0.467	1
Eea1	0.00995074	1.29728	0.261	0.121	1
Igbp1	0.00999936	0.949457	0.423	0.262	1
Mrps14	0.0100223	-0.609913	0.586	0.692	1
Cds1	0.0100252	1.76541	0.18	0.065	1
Mbtd1	0.0100337	0.714262	0.414	0.252	1
Galnt11	0.0100508	1.15419	0.288	0.14	1
Wdr89	0.0101319	1.25397	0.261	0.121	1
Serf2	0.0101388	-0.229471	0.982	0.972	1
Eef2	0.0102399	0.392001	0.928	0.804	1
Slc8b1	0.0103554	1.35517	0.297	0.159	1
Ier3ip1	0.0103737	-0.615799	0.541	0.645	1
0610040J01Rik	0.0104793	1.60829	0.135	0.037	1
Clasrp	0.0104793	1.986	0.135	0.037	1
Tmem141	0.0104958	1.01024	0.198	0.075	1
Avpi1	0.0105489	0.596395	0.604	0.411	1
Fbxo42	0.0105919	0.681228	0.153	0.047	1
Arnt	0.0108561	1.16545	0.207	0.084	1
Arf3	0.0109058	0.739444	0.468	0.299	1
Psmb8	0.0109511	-0.263938	0.955	0.972	1
Dgat1	0.0110208	1.75151	0.135	0.037	1
Gpat4	0.0111672	1.25803	0.18	0.065	1
Tram1	0.0111781	0.68707	0.495	0.336	1
Srsf7	0.0111935	0.398109	0.757	0.579	1
Sord	0.0112105	2.2703	0.081	0.009	1
Zfp182	0.0112105	2.5017	0.081	0.009	1
Wbp2	0.0112847	0.676992	0.414	0.252	1
Wbp1l	0.0112982	1.26801	0.207	0.084	1
Cyfip2	0.0113542	0.885852	0.342	0.187	1
Rilpl2	0.0113718	0.877718	0.532	0.402	1
Zfp597	0.0114017	2.99844	0.081	0.009	1
Stap2	0.0114017	3.34267	0.081	0.009	1
Treml4	0.011493	3.22254	0.117	0.028	1
Clp1	0.0116355	1.36091	0.153	0.047	1
Aar2	0.011652	2.62416	0.099	0.019	1
Trim25	0.0117256	0.609478	0.495	0.336	1
Nqo1	0.0117356	-2.30418	0	0.047	1
Ippk	0.0117926	2.94676	0.081	0.009	1
Miip	0.0118684	1.66995	0.162	0.056	1
Nfkb2	0.0119915	0.635463	0.441	0.262	1
Odr4	0.0120369	1.4034	0.252	0.121	1
Chmp5	0.0121373	0.505834	0.613	0.43	1
Dpep2	0.0121954	2.25727	0.081	0.009	1
Rassf3	0.0122233	1.10282	0.414	0.252	1
Mtif3	0.0122471	2.32769	0.144	0.047	1
Spty2d1	0.0123501	0.949845	0.541	0.374	1
Vezf1	0.012436	1.14448	0.261	0.121	1
Dcaf10	0.0125481	1.90857	0.099	0.019	1
Hopx	0.0125507	1.61529	0.162	0.056	1
Slc7a8	0.0126103	0.622648	0.081	0.009	1
Rubcnl	0.0126225	0.90773	0.153	0.047	1
Rapgef6	0.0126358	0.783251	0.387	0.215	1
Actg1	0.0126412	0.338604	0.991	0.981	1
Tollip	0.0127087	1.68631	0.171	0.065	1
Apoe	0.0127692	1.75319	0.351	0.224	1
Uhrf2	0.0127981	1.45563	0.288	0.159	1
Utrn	0.0128026	1.14346	0.189	0.075	1
Aco2	0.0128543	0.713508	0.369	0.206	1
Gnl2	0.0129051	2.01351	0.225	0.112	1
Cnpy3	0.0129758	0.64623	0.495	0.327	1
Cpd	0.0129766	1.72111	0.162	0.056	1
Gatad2b	0.0129981	0.721948	0.432	0.28	1
Rem1	0.0131086	-2.69887	0.018	0.093	1
Mfsd11	0.0131172	0.936209	0.135	0.037	1
Pts	0.0132214	-1.01828	0.324	0.467	1
Rab43	0.0132743	1.2496	0.261	0.131	1
Celf2	0.013366	0.525846	0.667	0.505	1
Rasa2	0.0134636	1.11497	0.216	0.093	1
Cd47	0.0135187	0.28182	0.964	0.804	1
Csnk1g2	0.0135781	0.847963	0.414	0.262	1
Mien1	0.0135837	-0.984992	0.468	0.551	1
Cd274	0.0137107	1.84974	0.225	0.103	1
Rps27	0.013753	0.19494	1	0.972	1
Cmtm6	0.013842	0.363582	0.36	0.196	1
Spop	0.0138802	0.420826	0.712	0.505	1
Rnf167	0.0138922	0.565102	0.351	0.187	1
Pacsin2	0.0139471	0.959828	0.351	0.206	1
Psmc2	0.0140368	-0.681845	0.405	0.514	1
Fbxl4	0.0141421	-3.06551	0.018	0.093	1
Gm49336	0.0141434	-1.25836	0.063	0.168	1
Dgat2	0.0141754	1.18299	0.162	0.056	1
Arap1	0.0144283	0.791728	0.243	0.112	1
Pml	0.014431	1.01191	0.27	0.131	1
Slmap	0.0144371	1.6109	0.144	0.047	1
Nub1	0.0145389	1.04264	0.477	0.336	1
Neu1	0.0146204	1.30097	0.27	0.14	1
Papss1	0.0146252	0.766878	0.234	0.112	1
Hpf1	0.0146535	-1.39733	0.27	0.393	1
Wnk1	0.0147791	0.551628	0.73	0.626	1
Trim28	0.0147849	1.11333	0.315	0.178	1
Cldnd1	0.0147849	0.976493	0.315	0.178	1
Baz2a	0.014786	1.07318	0.333	0.187	1
Trpm7	0.0149725	0.368837	0.261	0.131	1
Lrrc59	0.0150023	0.509962	0.369	0.224	1
Cd151	0.0150037	2.72385	0.126	0.037	1
Lyn	0.015011	0.333826	0.766	0.617	1
Rab4b	0.01502	-1.13865	0.018	0.093	1
Alg9	0.01502	-2.27025	0.018	0.093	1
Xpo6	0.0150349	1.24424	0.225	0.103	1
Utp14b	0.0151385	2.1785	0.054	0	1
Zfp46	0.0151385	2.25576	0.054	0	1
Apbb2	0.0151385	1.71009	0.054	0	1
Zfp938	0.0151385	2.04616	0.054	0	1
Med26	0.0151385	2.35059	0.054	0	1
Cenpt	0.0151385	2.52661	0.054	0	1
Alkbh8	0.0151385	2.78045	0.054	0	1
Srgn	0.0152982	0.191585	0.955	0.925	1
Taf1d	0.0153011	0.801459	0.45	0.29	1
Irf8	0.0153355	0.545703	0.64	0.486	1
Bax	0.0153361	-0.667945	0.658	0.766	1
Etfdh	0.0153806	2.25994	0.126	0.037	1
Abitram	0.0153933	-1.37023	0.027	0.112	1
Man2a1	0.0153995	1.10004	0.243	0.121	1
Trafd1	0.0154131	0.694959	0.505	0.346	1
Erf	0.0155493	0.9983	0.171	0.065	1
Pea15a	0.0156114	0.611826	0.279	0.14	1
Ubap2	0.015712	0.125779	0.234	0.112	1
Ncaph2	0.0157383	0.63298	0.315	0.178	1
Nufip2	0.0157716	1.40514	0.342	0.206	1
Ubald2	0.0158153	0.787774	0.622	0.523	1
Hspa1a	0.0158224	2.97847	0.153	0.056	1
Rad21	0.0159534	0.995564	0.306	0.168	1
Tra2a	0.0160104	0.471238	0.658	0.486	1
Far1	0.0160722	0.856085	0.36	0.215	1
Smim3	0.0160784	0.769578	0.468	0.318	1
Klhl24	0.0160855	0.547422	0.523	0.346	1
Atp5e	0.0161409	-0.217356	0.982	0.944	1
Zdhhc5	0.0161723	1.56731	0.198	0.084	1
Stat1	0.0162247	0.604398	0.685	0.514	1
Pqlc1	0.0162732	0.782361	0.378	0.224	1
Ccl4	0.0163638	1.26307	0.45	0.299	1
Ube2m	0.0163686	0.426733	0.721	0.523	1
Coq10b	0.0164386	0.457527	0.685	0.542	1
Zpld2	0.0165318	0.967771	0.045	0.019	1
Cast	0.0165891	0.442169	0.414	0.252	1
Nt5c	0.0168334	-0.709231	0.532	0.645	1
Igsf8	0.0168768	0.574438	0.477	0.299	1
Selplg	0.0169238	0.353291	0.838	0.72	1
Txnrd1	0.0171203	1.23293	0.306	0.168	1
Lats2	0.0172628	0.905154	0.333	0.196	1
Tmem135	0.017301	1.24653	0.198	0.084	1
Vapb	0.0173108	0.821235	0.396	0.243	1
Kti12	0.0173109	-1.55661	0.081	0.187	1
Il10ra	0.0173503	1.14907	0.396	0.262	1
Phc1	0.0173626	2.3037	0.108	0.028	1
Cd37	0.017425	0.508175	0.333	0.178	1
Mia3	0.0174967	0.869672	0.432	0.28	1
Lancl1	0.0176066	1.62213	0.126	0.037	1
Ralgps2	0.0176066	1.21318	0.126	0.037	1
Ptpn23	0.0176066	1.81002	0.126	0.037	1
Ncoa4	0.0176723	0.848193	0.315	0.178	1
Fndc3a	0.0179178	1.03529	0.387	0.234	1
Cyld	0.0180448	0.869148	0.387	0.234	1
Ms4a4c	0.0180824	-0.434919	0.414	0.598	1
Ddit4	0.0182445	1.90865	0.153	0.056	1
Them6	0.0182445	1.61953	0.153	0.056	1
Dus3l	0.0182607	1.72512	0.126	0.037	1
Ccdc174	0.0182921	1.3293	0.27	0.14	1
Nfe2l1	0.0183089	0.674116	0.396	0.243	1
Cdk13	0.0183618	0.91497	0.315	0.178	1
Naca	0.0185667	-0.251268	0.991	0.963	1
Fam117b	0.0185731	1.0779	0.306	0.187	1
Hes1	0.0186446	2.18844	0.153	0.056	1
Col27a1	0.0187085	1.39887	0.126	0.037	1
Psmb3	0.0187133	-0.412279	0.775	0.85	1
Ddi2	0.0188611	1.11777	0.288	0.159	1
Pura	0.018891	0.794308	0.423	0.262	1
Cant1	0.0189929	1.29082	0.207	0.093	1
Tk2	0.0190016	0.861312	0.144	0.047	1
Gadd45a	0.0190299	2.95458	0.09	0.019	1
Rab21	0.0190508	0.650637	0.667	0.57	1
Ttll9	0.0191292	2.34688	0.072	0.009	1
Ston2	0.0191292	3.06585	0.072	0.009	1
Psme2b	0.0192592	1.62901	0.153	0.056	1
Map3k12	0.0192592	1.26869	0.153	0.056	1
Pde1b	0.0192835	0.787546	0.189	0.075	1
Ier5	0.0193072	0.411026	0.775	0.645	1
Hgs	0.0194032	2.10656	0.135	0.047	1
Gpr171	0.0194119	0.894462	0.468	0.327	1
Cabin1	0.0194123	-1.38277	0.198	0.327	1
Map3k14	0.0194272	1.15489	0.378	0.243	1
Ipo13	0.0194511	1.94535	0.072	0.009	1
Tkfc	0.0194511	3.67965	0.072	0.009	1
Hadh	0.0194679	1.58743	0.153	0.056	1
Prr12	0.019633	1.38402	0.126	0.037	1
Ndufaf8	0.0196441	-0.675468	0.396	0.505	1
Casp2	0.0196786	1.40453	0.153	0.056	1
Dcun1d1	0.0197944	-0.946154	0.108	0.224	1
Slc15a2	0.0198068	-0.137972	0.108	0.028	1
Tpm4	0.0198109	0.686657	0.793	0.682	1
Brk1	0.0201053	0.106899	0.829	0.72	1
Nanp	0.0201089	2.39496	0.072	0.009	1
Depdc5	0.0201089	2.25745	0.072	0.009	1
Taf5	0.0201089	2.16314	0.072	0.009	1
Ltb	0.0201537	-0.97668	0.234	0.374	1
Rbm12	0.020168	2.16107	0.09	0.019	1
Foxk1	0.0203228	1.67899	0.153	0.056	1
Sh2b3	0.0203251	0.970753	0.333	0.196	1
Clec9a	0.0203306	0.941172	0.288	0.168	1
Zranb1	0.020399	0.895212	0.297	0.168	1
Bcar3	0.0204451	2.293	0.072	0.009	1
Cwf19l2	0.0205618	1.05923	0.288	0.159	1
Kdm7a	0.0205829	0.601143	0.568	0.383	1
Gtf2h5	0.0206359	-0.7665	0.568	0.645	1
Sla	0.0206648	0.36034	0.459	0.308	1
Chd1l	0.020759	2.42594	0.09	0.019	1
Chfr	0.0207612	1.65709	0.225	0.112	1
Jade2	0.0207801	2.05032	0.135	0.047	1
Rpl28	0.0208248	-0.246223	1	0.991	1
Snx22	0.0208338	1.27171	0.27	0.15	1
Sh3pxd2b	0.0209003	0.988441	0.189	0.075	1
Leo1	0.0209244	-1.91759	0.045	0.131	1
Acbd5	0.0209516	0.856322	0.315	0.168	1
Tcerg1	0.0209516	1.13509	0.306	0.178	1
Ip6k2	0.0209853	1.75124	0.153	0.056	1
Afg3l1	0.0210482	0.502484	0.297	0.15	1
Ccnyl1	0.0210602	1.6808	0.09	0.019	1
Frat1	0.0210602	1.90721	0.09	0.019	1
Gcnt2	0.021101	1.11786	0.414	0.29	1
Tarsl2	0.0211322	1.65958	0.063	0.009	1
Ndufa1	0.0211364	-0.465087	0.757	0.813	1
Ganab	0.0211492	1.11272	0.225	0.103	1
Sdc3	0.021166	0.341802	0.55	0.355	1
Carm1	0.0212576	2.03331	0.135	0.047	1
Milr1	0.0213604	-1.3095	0.189	0.308	1
Yif1b	0.0214231	0.708284	0.486	0.336	1
Hnrnph1	0.0215227	0.5421	0.486	0.308	1
Heca	0.0217503	1.15327	0.261	0.14	1
Vmn1r70	0.0217638	-3.27114	0	0.019	1
Ddx50	0.0217651	0.737218	0.459	0.308	1
Elk1	0.021766	-3.22177	0	0.047	1
Smug1	0.021766	-3.15706	0	0.047	1
Pi16	0.021766	-3.17257	0	0.047	1
Cdc42bpg	0.021766	-3.40157	0	0.047	1
Traf7	0.0217792	0.941572	0.288	0.15	1
Pycr2	0.0218152	-1.2922	0.135	0.252	1
Traf3ip1	0.0218393	1.53325	0.072	0.009	1
Lrrc3	0.0218393	1.5573	0.072	0.009	1
Klf2	0.0219719	0.597497	0.64	0.477	1
Cpox	0.0219733	1.25302	0.108	0.028	1
Sbno1	0.021977	0.877613	0.468	0.299	1
Pnpla6	0.0219865	1.71558	0.09	0.019	1
Casp8ap2	0.0220848	1.0109	0.18	0.075	1
Kif1bp	0.0220848	1.13656	0.18	0.075	1
Exoc2	0.0221223	1.35686	0.189	0.084	1
Tmem74bos	0.022234	0.636084	0.036	0.019	1
Rrad	0.0222528	0.975322	0.306	0.178	1
Gdi2	0.0223161	0.271202	0.901	0.869	1
Top1	0.0225808	0.682821	0.658	0.579	1
Phc2	0.0225889	1.18849	0.306	0.178	1
Psmb6	0.0226596	-0.347448	0.73	0.776	1
Foxp1	0.0226846	0.541633	0.622	0.467	1
Cxcr3	0.0226912	0.836549	0.216	0.103	1
Palm	0.0227372	1.43169	0.18	0.075	1
Rabep1	0.0228017	-1.65676	0.126	0.243	1
Zfp943	0.0229481	1.73851	0.09	0.019	1
Tfam	0.0230036	1.53037	0.198	0.093	1
Uck1	0.023005	1.83878	0.135	0.047	1
Vps37a	0.0230511	0.732725	0.234	0.112	1
Tmem39a	0.0231554	2.39152	0.18	0.084	1
Naip5	0.0232645	2.11845	0.135	0.047	1
Surf6	0.0232766	1.34812	0.09	0.019	1
Ttbk2	0.0232766	1.227	0.09	0.019	1
Usp34	0.0233382	0.665473	0.414	0.252	1
Ptger4	0.0235105	1.01486	0.351	0.224	1
Rps27a	0.0235807	-0.167619	1	1	1
Tex10	0.0236129	-1.3434	0.063	0.168	1
Elovl5	0.0236683	0.897326	0.27	0.14	1
Ganc	0.0237912	1.39954	0.135	0.047	1
Sin3b	0.0238088	0.351872	0.739	0.579	1
Orc2	0.0238531	1.34001	0.162	0.065	1
Parp4	0.0239276	0.699646	0.279	0.14	1
Ivd	0.0240584	1.52482	0.135	0.047	1
Ubr5	0.0242254	1.05246	0.234	0.121	1
Slc31a1	0.024248	-1.34502	0.117	0.224	1
Map1lc3a	0.0242519	1.29823	0.432	0.327	1
Ints10	0.0243283	1.82996	0.135	0.047	1
Tbc1d15	0.0243287	1.00318	0.378	0.252	1
Spns1	0.0246007	1.68514	0.135	0.047	1
Panx1	0.024632	0.962424	0.09	0.019	1
Samsn1	0.0246904	0.887209	0.577	0.43	1
Rbm4b	0.0247842	0.679201	0.324	0.187	1
Scamp3	0.0248163	0.356099	0.27	0.14	1
Arhgef7	0.0250342	1.18907	0.18	0.075	1
Slc9a9	0.025086	1.44188	0.162	0.065	1
Zdhhc18	0.0254527	1.40013	0.189	0.084	1
Traf4	0.0255238	1.35811	0.171	0.075	1
Pkn1	0.0255691	0.618188	0.514	0.364	1
Ctc1	0.0256712	-2.30795	0.018	0.084	1
Ubac1	0.0256894	1.17815	0.189	0.084	1
Hvcn1	0.0256894	1.39593	0.189	0.084	1
Haus4	0.025717	1.35727	0.135	0.047	1
Borcs8	0.025781	-1.16018	0.351	0.477	1
Zfp335	0.0258279	-4.37329	0.009	0.065	1
mt-Nd4l	0.0259003	-0.668376	0.532	0.645	1
1110004F10Rik	0.025937	-0.650045	0.559	0.626	1
Ldb1	0.0259539	1.18659	0.225	0.112	1
Rpl31	0.0259815	-0.150213	0.937	0.953	1
Galk2	0.0260481	-1.1306	0.063	0.159	1
Hrh2	0.0260485	-1.81525	0.018	0.084	1
Leng8	0.0261975	0.72552	0.387	0.252	1
Mast2	0.0262701	-2.71155	0.009	0.065	1
Plet1	0.0262701	-3.41067	0.009	0.065	1
Fstl5	0.0262788	0.266452	0.054	0.037	1
Klf6	0.0263156	0.741878	0.712	0.598	1
Unc119	0.0263299	0.699721	0.477	0.327	1
Chp1	0.0264261	0.619127	0.369	0.224	1
Fcgrt	0.0264899	0.646798	0.495	0.383	1
Actr2	0.026509	0.230966	0.766	0.664	1
Samhd1	0.0265338	0.394612	0.775	0.626	1
Il6ra	0.0266383	0.67845	0.324	0.187	1
Foxk2	0.0266728	1.53408	0.18	0.084	1
Paqr8	0.0267188	-1.92753	0.009	0.065	1
Aqp3	0.0267188	-2.04898	0.009	0.065	1
Rwdd4a	0.0267866	1.56621	0.171	0.075	1
Senp1	0.0267866	1.56675	0.171	0.075	1
Fyn	0.0268453	0.687112	0.441	0.318	1
Atp5pb	0.0268749	-0.361458	0.901	0.907	1
Borcs5	0.0269016	1.09921	0.189	0.084	1
Map1a	0.026992	1.06668	0.018	0	1
Camk2n2	0.026992	1.10714	0.018	0	1
Mcmdc2	0.0269947	2.54181	0.045	0	1
Knl1	0.0269947	2.86947	0.045	0	1
Armcx6	0.0269947	2.21485	0.045	0	1
Zfp956	0.0269947	3.22731	0.045	0	1
[truncated: 9,765 more rows]

## Sheet: 7 Tmbim+;Gnai2-male vs female
Gene	p value	Average log2 fold change	Fraction of cells expressing the gene in male cluster	Fraction of cells expressing the gene in female cluster	Adjusted p value
[truncated: 9,367 more rows]

[truncated: 9 more sheets: 8 Macrophage- male vs female, 9 Tcells-male vs female, 10 Macroph,Ccl4+-male vs female, 11 Nonsensory- male vs female, 12 Immature neu-male vs female, 13 glandular tis-male vs female, 14 Gnao1 neuron-male vs female, 15 Sustentacular-male vs female, 16 Gnai2 neuron-male vs female]
