# Supplementary material for: Single-cell transcriptomics of vomeronasal neuroepithelium reveals a differential endoplasmic reticulum environment amongst neuronal subtypes
Source: eLife. 2024 Dec 13;13:RP98250. doi: 10.7554/eLife.98250 (PMC11643622; doi:10.7554/eLife.98250)
Supplement: Figure 3—source data 1. — Genes that satisfy the criteria |log2 foldchange|>1 and adjusted p-value <10–6 are saved in a separate sheet. [file elife-98250-fig3-data1.xlsx]

## Sheet: immatureGnao1vsGnai2
Figure 3-Source Data 1. Differentially expressed genes between immature Gnao1 and immature Gnai2 neurons.
Gene	p value	Avergae log2 Fold Change(Gnao1 vs Gnai2)	Fraction of cells expressing the gene in immature Gnao1 cluster	Fraction of cells expressing the gene in immature Gnai2 cluster	Adjusted p-value
Meis2	2.5621e-73	-4.43605	0.137	0.982	5.59946e-69
Gnai2	6.32715e-70	-3.6266	0.652	0.982	1.3828e-65
Cnpy1	7.02093e-62	3.13788	0.931	0.237	1.53443e-57
Cystm1	3.71841e-58	-1.57481	0.951	0.978	8.12658e-54
Gnao1	3.51154e-56	2.05096	0.971	0.708	7.67447e-52
Gng2	7.86341e-55	-2.24456	0.574	0.96	1.71855e-50
Tfap2e	3.36423e-54	4.72086	0.74	0.058	7.35252e-50
Shisa8	1.07292e-51	4.52804	0.73	0.069	2.34488e-47
Prdx2	3.19475e-48	1.23859	0.995	0.967	6.98213e-44
Krt8	3.12774e-47	2.15711	0.961	0.781	6.83568e-43
Pcdh7	2.97396e-44	-4.37559	0.069	0.723	6.49958e-40
Rtp1	1.63e-42	-4.38981	0.103	0.719	3.56237e-38
Ncam2	1.55672e-41	-4.44076	0.064	0.69	3.4022e-37
Krt18	1.69509e-40	2.07136	0.961	0.777	3.70462e-36
Esd	1.67923e-38	-2.40911	0.157	0.763	3.66996e-34
Nhlh2	1.26875e-37	1.27888	0.975	0.891	2.77286e-33
Car2	2.20013e-37	-3.45659	0.25	0.781	4.80839e-33
Fam241a	3.45647e-37	-2.77671	0.324	0.81	7.55412e-33
Dync1i1	8.34782e-36	1.83012	0.907	0.657	1.82442e-31
Tspan1	8.11431e-35	-3.20228	0.181	0.712	1.77338e-30
Fth1	2.08238e-33	-1.26836	1	0.989	4.55103e-29
Ttll7	5.15269e-32	-1.48393	0.725	0.927	1.12612e-27
Robo2	1.93616e-30	2.23567	0.745	0.281	4.23147e-26
Gm36028	2.42555e-30	2.82678	0.789	0.376	5.30104e-26
Osbpl9	2.98101e-30	1.51872	0.917	0.712	6.51499e-26
Akr1b3	5.94303e-30	2.48203	0.73	0.299	1.29885e-25
Homer2	6.83933e-30	1.50107	0.922	0.62	1.49473e-25
Spats2	8.34088e-30	1.19753	0.946	0.799	1.8229e-25
Gapdh	1.55107e-29	-0.834405	0.975	0.996	3.38986e-25
Prrxl1	2.22625e-29	4.81516	0.5	0.066	4.86546e-25
Rps26	9.59023e-29	0.865399	0.985	0.982	2.09594e-24
Fam3c	4.206e-27	2.05121	0.794	0.515	9.19221e-23
Plaat3	1.11935e-26	-1.66839	0.564	0.894	2.44635e-22
Tppp3	2.84382e-26	2.68852	0.539	0.109	6.21516e-22
Rtp2	3.21404e-26	-2.05237	0.26	0.723	7.02427e-22
Sgpl1	4.10153e-26	-1.85561	0.392	0.774	8.9639e-22
Lmo4	5.04755e-26	1.93368	0.995	0.931	1.10314e-21
Chga	7.20144e-26	-1.21499	0.946	0.985	1.57387e-21
Manf	9.38546e-26	1.4516	0.956	0.974	2.05119e-21
Dut	4.46037e-25	1.15223	0.926	0.876	9.74814e-21
Snca	5.72859e-25	-1.11827	0.735	0.931	1.25198e-20
Nsg1	6.8796e-25	-1.37254	0.961	0.978	1.50354e-20
Trp53i11	9.54392e-25	1.18817	0.941	0.796	2.08582e-20
Tubb4b	4.59393e-24	-0.927908	0.995	0.993	1.004e-19
Apmap	4.59717e-24	1.49045	0.917	0.785	1.00471e-19
Jak1	8.07619e-24	0.783107	0.98	0.956	1.76505e-19
Plekhb1	8.17089e-24	-3.38273	0.142	0.566	1.78575e-19
Vmn2r1	1.81231e-23	3.08743	0.451	0.069	3.96081e-19
Ypel3	3.10027e-23	-0.751596	0.956	0.978	6.77564e-19
Ssb	4.16916e-23	0.944816	0.966	0.953	9.11171e-19
Gng3	2.80872e-22	-1.55334	0.549	0.818	6.13845e-18
Rps19	3.70688e-22	0.520977	0.995	0.985	8.10138e-18
Clmn	4.1262e-22	1.50117	0.858	0.584	9.0178e-18
Rpl10	1.173e-21	0.543186	0.995	0.985	2.5636e-17
Prdx1	1.46532e-21	-1.64142	0.412	0.781	3.20246e-17
Rps15a	2.96363e-21	0.467253	0.99	0.982	6.477e-17
Gnb1	3.1298e-21	-0.672227	1	0.989	6.84017e-17
Agpat5	2.00477e-20	1.77253	0.745	0.474	4.38142e-16
Kctd1	2.16942e-20	1.85033	0.794	0.5	4.74128e-16
Batf3	3.10018e-20	5.02632	0.309	0.015	6.77545e-16
Rprml	3.63243e-20	6.28565	0.299	0.011	7.93867e-16
Ero1lb	4.04914e-20	1.57926	0.794	0.511	8.8494e-16
Gramd1c	4.43767e-20	-3.91308	0.049	0.42	9.69852e-16
Cd47	5.51541e-20	-0.667639	0.971	0.978	1.20539e-15
Sdf2l1	7.57752e-20	2.04851	0.853	0.715	1.65607e-15
Sphkap	1.06956e-19	3.66221	0.382	0.058	2.33752e-15
Srsf4	1.17443e-19	1.65821	0.779	0.496	2.56672e-15
S100a10	1.35654e-19	-1.4121	0.529	0.85	2.96472e-15
Sae1	1.59067e-19	-0.858115	0.824	0.945	3.47641e-15
Bcl7a	7.50908e-19	0.993369	0.956	0.887	1.64111e-14
Gng13	8.45372e-19	-4.68382	0.206	0.551	1.84756e-14
Dusp15	9.82021e-19	2.06413	0.544	0.19	2.14621e-14
Sp8	1.05678e-18	3.97222	0.333	0.036	2.3096e-14
Gdpd1	1.42459e-18	-1.23688	0.647	0.847	3.11344e-14
Chd5	1.43267e-18	4.49478	0.304	0.022	3.1311e-14
Prxl2a	1.53509e-18	-1.35018	0.696	0.898	3.35494e-14
Mid1ip1	1.68583e-18	-1.28027	0.52	0.81	3.68438e-14
Pdia6	1.68663e-18	1.2048	0.926	0.876	3.68614e-14
Lpcat2	1.83561e-18	-1.58339	0.275	0.672	4.01173e-14
Clgn	1.86088e-18	-1.19563	0.73	0.883	4.06695e-14
Saraf	2.28232e-18	-0.740755	0.951	0.989	4.988e-14
Hmgn3	2.3736e-18	-0.561671	0.995	0.982	5.18751e-14
Chgb	4.11749e-18	-2.29657	0.162	0.536	8.99878e-14
Snrpe	4.19112e-18	0.771708	0.98	0.96	9.1597e-14
Optn	5.27244e-18	2.87998	0.426	0.102	1.15229e-13
Aplp2	5.37867e-18	-0.961366	0.912	0.982	1.17551e-13
Rnf11	5.6461e-18	0.801521	0.966	0.92	1.23395e-13
Ndufv3	6.35914e-18	-0.918242	0.936	0.967	1.38979e-13
Anp32a	1.4316e-17	1.13795	0.956	0.839	3.12876e-13
Ndufa4	1.5676e-17	-0.395311	1	0.996	3.42599e-13
Tafa1	2.20596e-17	1.60666	0.48	0.124	4.82113e-13
Foxo1	4.13234e-17	2.66948	0.588	0.281	9.03123e-13
Prnp	5.11334e-17	-0.891704	0.799	0.931	1.11752e-12
Tstd1	5.12143e-17	-1.18109	0.574	0.832	1.11929e-12
Rnaseh2a	5.7437e-17	1.42708	0.725	0.449	1.25529e-12
Camk1	6.0721e-17	-1.35266	0.412	0.745	1.32706e-12
Lingo2	6.8897e-17	-2.25736	0.137	0.507	1.50574e-12
Jund	1.20039e-16	-0.598341	0.975	0.985	2.62344e-12
Gcnt2	1.30739e-16	-2.50167	0.162	0.5	2.8573e-12
Rplp0	1.84885e-16	0.566063	0.99	0.989	4.04066e-12
Retreg1	1.90647e-16	-0.951342	0.74	0.931	4.1666e-12
Sox11	2.20655e-16	0.956531	0.98	0.949	4.82241e-12
Jpt1	3.13491e-16	0.640026	0.985	0.956	6.85135e-12
Csrp2	4.09363e-16	2.88141	0.397	0.091	8.94663e-12
Txn1	4.27098e-16	-0.760631	0.951	0.971	9.33422e-12
Sept11	9.05466e-16	1.41775	0.711	0.423	1.9789e-11
Macrod1	1.16973e-15	-1.34843	0.505	0.766	2.55644e-11
Asah1	1.19179e-15	-1.52281	0.407	0.708	2.60466e-11
Uchl1	2.12905e-15	-0.432339	0.99	0.985	4.65304e-11
Nfe2l2	2.18293e-15	-1.76513	0.245	0.58	4.77079e-11
Nqo1	2.2828e-15	-3.40942	0.064	0.376	4.98906e-11
Spsb3	3.72578e-15	-1.13638	0.48	0.774	8.14269e-11
Mt3	3.95409e-15	2.27675	0.485	0.186	8.64166e-11
Sytl1	5.45162e-15	-1.43558	0.407	0.708	1.19145e-10
BC052040	6.37528e-15	-2.9391	0.054	0.35	1.39332e-10
Rbbp6	6.56996e-15	0.897724	0.882	0.73	1.43586e-10
Smim22	8.28876e-15	-1.39763	0.338	0.672	1.81151e-10
Cd81	8.79764e-15	-0.753006	0.892	0.982	1.92272e-10
Omp	9.48727e-15	-2.0349	0.382	0.664	2.07344e-10
Creb5	1.24943e-14	2.58602	0.485	0.197	2.73063e-10
Myl6	1.25639e-14	-0.600401	0.941	0.978	2.74585e-10
Dnm1	1.51448e-14	-2.02738	0.201	0.518	3.30989e-10
Wdr66	1.54962e-14	1.49633	0.613	0.299	3.38669e-10
Tenm2	1.65338e-14	-1.55351	0.186	0.551	3.61346e-10
Mkrn2os	1.69524e-14	-1.5737	0.216	0.558	3.70494e-10
Tubb5	2.02452e-14	0.567029	0.995	0.982	4.42458e-10
Eef1a2	2.14599e-14	-0.949189	0.681	0.876	4.69006e-10
Srcin1	2.1998e-14	-1.27287	0.471	0.734	4.80766e-10
Pebp1	3.34745e-14	0.461601	1	0.978	7.31586e-10
Dpysl3	3.36467e-14	0.468165	0.985	0.985	7.35348e-10
Med30	4.21888e-14	-0.889651	0.76	0.912	9.22036e-10
Fstl5	4.92435e-14	-0.437822	0.985	0.993	1.07622e-09
Fbxo17	5.43019e-14	2.26346	0.426	0.146	1.18677e-09
Sec61b	6.52067e-14	0.590697	0.98	0.964	1.42509e-09
Clptm1	6.90822e-14	-1.46065	0.574	0.763	1.50979e-09
Reep5	8.36304e-14	-0.553557	0.951	0.971	1.82774e-09
Cited2	9.03841e-14	1.68283	0.672	0.412	1.97535e-09
Tom1	9.748e-14	-1.83104	0.196	0.507	2.13043e-09
S100a13	1.30411e-13	-2.60957	0.162	0.456	2.85014e-09
Ugp2	1.4672e-13	0.97504	0.809	0.664	3.20657e-09
Calm3	1.61268e-13	-0.537092	0.951	0.964	3.52451e-09
Tmem74bos	2.02802e-13	-1.47025	0.426	0.69	4.43223e-09
Resp18	2.14312e-13	-3.2824	0.078	0.369	4.68378e-09
Atp5g1	2.37617e-13	-0.813808	0.686	0.916	5.19311e-09
Creld2	3.13625e-13	1.71633	0.647	0.423	6.85427e-09
Magi2	3.20823e-13	-1.41751	0.338	0.639	7.01159e-09
Calr4	3.45936e-13	1.16322	0.882	0.799	7.56042e-09
Chmp2b	4.14515e-13	-1.49556	0.289	0.595	9.05923e-09
Dock8	4.27379e-13	-2.15646	0.113	0.412	9.34037e-09
Atp6v0c	4.37101e-13	-0.474883	0.971	0.956	9.55285e-09
Ly6h	4.43959e-13	-0.613017	0.971	0.971	9.70273e-09
Ezh2	4.61891e-13	1.59579	0.603	0.318	1.00946e-08
Dnajb11	6.01385e-13	0.781539	0.926	0.92	1.31433e-08
Scgn	6.299e-13	-2.9815	0.049	0.318	1.37665e-08
Pea15a	7.26033e-13	1.88574	0.554	0.277	1.58674e-08
Ywhaq	8.73821e-13	0.451126	0.98	0.964	1.90974e-08
mt-Co3	9.97274e-13	0.372016	0.995	0.993	2.17954e-08
Nfix	1.0185e-12	-1.35948	0.309	0.635	2.22592e-08
Cdkn1c	1.1989e-12	0.971438	0.956	0.905	2.6202e-08
Dlgap3	1.2579e-12	-2.08528	0.127	0.416	2.74914e-08
Smim11	1.31089e-12	-1.5199	0.225	0.536	2.86496e-08
Rps4x	1.38016e-12	-0.420352	1	0.993	3.01634e-08
Mbnl2	1.42602e-12	-0.730468	0.75	0.88	3.11657e-08
Hmgn1	1.74327e-12	0.623396	0.975	0.934	3.80992e-08
Celf4	1.86438e-12	-1.44263	0.284	0.591	4.0746e-08
Lrrc42	1.87459e-12	-1.72836	0.225	0.526	4.09692e-08
Sult4a1	1.89342e-12	-0.854564	0.618	0.858	4.13808e-08
Jakmip1	1.97215e-12	-2.09362	0.039	0.296	4.31014e-08
Pdlim4	2.13635e-12	3.6143	0.27	0.047	4.66899e-08
Pkib	2.13966e-12	-1.04338	0.417	0.715	4.67623e-08
Marcks	2.24354e-12	0.458805	0.98	0.978	4.90327e-08
Srsf6	2.31905e-12	-1.29967	0.338	0.631	5.06829e-08
Rbm11	2.32231e-12	-1.52084	0.186	0.504	5.07541e-08
Pdia3	2.35401e-12	0.645104	0.99	0.985	5.14468e-08
Kctd16	2.36083e-12	-1.20622	0.221	0.529	5.15959e-08
B4galt6	2.3726e-12	2.24415	0.304	0.062	5.18531e-08
Dsp	2.74363e-12	1.10337	0.711	0.46	5.9962e-08
Rpl11	2.89087e-12	0.304239	0.995	0.993	6.31799e-08
Ank2	3.11125e-12	-0.587193	0.931	0.967	6.79964e-08
Them6	3.39727e-12	-1.13991	0.49	0.77	7.42474e-08
Pcsk1n	3.57604e-12	-1.68961	0.23	0.522	7.81543e-08
Aplp1	3.63763e-12	-0.566429	0.946	0.982	7.95004e-08
Hspa5	3.89723e-12	1.11007	0.961	0.974	8.51739e-08
Terf2	3.97579e-12	1.91978	0.48	0.219	8.68908e-08
Atp6ap2	4.18848e-12	-0.853905	0.716	0.843	9.15393e-08
Tmem151a	5.07768e-12	-1.61872	0.225	0.526	1.10973e-07
Eml2	5.2055e-12	-3.46091	0.02	0.248	1.13766e-07
Mxi1	6.35695e-12	-0.929318	0.627	0.818	1.38931e-07
Pdia5	6.90635e-12	1.58198	0.471	0.204	1.50938e-07
mt-Atp6	7.33131e-12	0.396423	0.995	0.993	1.60226e-07
Nrp2	7.33889e-12	-0.861946	0.725	0.931	1.60392e-07
Cacng4	7.65244e-12	1.42588	0.642	0.369	1.67244e-07
Rpsa	8.53377e-12	0.347875	0.995	0.989	1.86505e-07
Hopx	8.66623e-12	-1.48026	0.201	0.515	1.89401e-07
Sv2a	8.76928e-12	-1.83732	0.162	0.453	1.91653e-07
Hmox2	8.84743e-12	-0.627843	0.824	0.931	1.9336e-07
Csdc2	8.91316e-12	1.92805	0.451	0.201	1.94797e-07
Aig1	9.35142e-12	-1.37274	0.304	0.602	2.04375e-07
Rpl23	1.07452e-11	0.331705	0.99	0.989	2.34836e-07
Gfy	1.09609e-11	-0.892004	0.941	0.953	2.39551e-07
Pde1a	1.29741e-11	-2.04994	0.123	0.405	2.83549e-07
Gnb2	1.54731e-11	0.811636	0.897	0.807	3.38164e-07
Pdgfa	1.73327e-11	1.24851	0.583	0.285	3.78807e-07
Pbx3	1.77029e-11	-1.07895	0.485	0.752	3.86897e-07
Cdca3	1.78499e-11	-2.86442	0.034	0.266	3.90109e-07
Fam92b	1.93793e-11	-0.838322	0.525	0.803	4.23534e-07
Rd3	2.22983e-11	0.58628	0.971	0.934	4.8733e-07
Grin3a	2.31318e-11	2.7909	0.245	0.04	5.05545e-07
Idi1	2.3693e-11	-1.03887	0.554	0.755	5.1781e-07
Taf15	2.37312e-11	1.02294	0.755	0.566	5.18646e-07
H2bc21	2.86857e-11	-1.17368	0.667	0.788	6.26926e-07
Mex3a	3.32275e-11	1.42843	0.544	0.259	7.26188e-07
Enho	3.43336e-11	0.90494	0.779	0.584	7.50361e-07
Ttll6	4.06775e-11	-1.90023	0.142	0.42	8.89006e-07
Pim3	4.10094e-11	0.69392	0.941	0.887	8.9626e-07
Abhd17a	4.30106e-11	-0.757711	0.735	0.865	9.39996e-07
Hsp90ab1	4.32112e-11	0.276001	1	1	9.44381e-07
Rpl27a	4.45967e-11	0.317187	1	0.989	9.74661e-07
Pcolce2	4.86292e-11	-4.50395	0.015	0.219	1.06279e-06
Napg	5.61676e-11	-0.864988	0.652	0.836	1.22754e-06
Ptprt	5.7297e-11	2.279	0.328	0.099	1.25223e-06
mt-Cytb	6.51707e-11	0.405351	0.995	0.993	1.4243e-06
Ubxn6	6.79654e-11	-0.629455	0.779	0.887	1.48538e-06
Hspa2	7.0028e-11	-1.4777	0.24	0.522	1.53046e-06
Sobp	7.1079e-11	-2.51346	0.044	0.277	1.55343e-06
Pcsk2	7.8501e-11	-1.63788	0.103	0.369	1.71564e-06
Macroh2a1	7.96315e-11	0.4678	0.985	0.967	1.74035e-06
Cacna2d1	8.1796e-11	-1.48735	0.275	0.544	1.78765e-06
Syt11	9.61453e-11	-0.510615	0.956	0.978	2.10126e-06
Rps3a1	1.04884e-10	0.298573	0.995	0.989	2.29224e-06
Nsg2	1.05133e-10	1.13237	0.549	0.266	2.29768e-06
Mgst3	1.22116e-10	-0.419858	0.961	0.989	2.66885e-06
Ovol2	1.23286e-10	1.06321	0.667	0.449	2.69441e-06
Hmgb1	1.30736e-10	0.344336	0.975	0.974	2.85723e-06
Calm1	1.32809e-10	-0.403792	1	0.989	2.90253e-06
Inpp4a	1.3816e-10	-1.33649	0.471	0.704	3.01948e-06
Tcf4	1.38195e-10	0.939246	0.961	0.927	3.02025e-06
Stt3b	1.39719e-10	1.30717	0.588	0.328	3.05356e-06
Hsp90b1	1.41837e-10	0.722381	0.98	0.978	3.09985e-06
Racgap1	1.49316e-10	1.00533	0.73	0.533	3.26331e-06
Lrpap1	1.51585e-10	-1.52418	0.23	0.5	3.31288e-06
Pcf11	1.60883e-10	-1.16788	0.377	0.646	3.5161e-06
Plxnd1	1.78837e-10	3.94409	0.176	0.015	3.90848e-06
Cacna1h	1.94682e-10	-1.28527	0.25	0.529	4.25478e-06
Psen2	1.97571e-10	-1.14063	0.564	0.799	4.31792e-06
Spcs2	2.03131e-10	0.746163	0.936	0.883	4.43942e-06
Ppl	2.03727e-10	-1.20369	0.426	0.679	4.45246e-06
Nppc	2.19895e-10	3.9042	0.206	0.029	4.8058e-06
Dhrs7	2.20094e-10	-0.947671	0.574	0.785	4.81016e-06
Dynll1	2.2987e-10	-0.383781	0.985	0.974	5.02381e-06
Meis1	2.33002e-10	-1.79595	0.181	0.449	5.09226e-06
Ndufb2	2.35966e-10	-0.623354	0.799	0.891	5.15705e-06
Armh4	2.38971e-10	-0.88069	0.436	0.737	5.2227e-06
Prxl2b	2.41683e-10	-1.6112	0.652	0.748	5.28198e-06
Rpl7	2.51294e-10	0.368094	0.995	0.978	5.49203e-06
Rps8	2.77034e-10	0.300809	0.995	0.996	6.05458e-06
Fscn1	2.78554e-10	1.4405	0.529	0.288	6.0878e-06
Rpl17	2.79439e-10	0.344775	0.995	0.989	6.10713e-06
Perp	3.03719e-10	-1.65613	0.157	0.427	6.63778e-06
Rpl35	3.38596e-10	0.317258	0.99	0.985	7.40002e-06
Tnnt1	3.7517e-10	-3.74758	0.02	0.212	8.19933e-06
Vapb	4.12839e-10	-0.790689	0.667	0.836	9.0226e-06
Rab36	4.73747e-10	-1.17708	0.363	0.613	1.03537e-05
Atox1	4.7385e-10	1.45088	0.858	0.73	1.0356e-05
Dner	5.33106e-10	-1.47502	0.201	0.453	1.1651e-05
Grasp	5.34765e-10	1.85964	0.377	0.139	1.16873e-05
Zdhhc3	5.7318e-10	-1.23231	0.466	0.668	1.25268e-05
Tmem256	5.97627e-10	-0.733122	0.711	0.854	1.30611e-05
Gm13889	6.31322e-10	4.89644	0.152	0.007	1.37975e-05
Rpl37	6.76325e-10	0.335552	0.995	0.993	1.47811e-05
Gm1673	6.89955e-10	0.467318	0.975	0.949	1.5079e-05
Klhl13	7.38407e-10	1.79722	0.348	0.12	1.61379e-05
Usp12	7.38791e-10	-1.166	0.377	0.639	1.61463e-05
Atp1a1	7.88893e-10	-0.772767	0.873	0.934	1.72413e-05
Dlx3	7.90868e-10	0.97278	0.721	0.507	1.72844e-05
Rps16	8.21366e-10	0.372956	0.99	0.982	1.7951e-05
Mapkap1	8.41577e-10	-0.564454	0.833	0.942	1.83927e-05
Mcoln3	8.99847e-10	-0.910826	0.446	0.723	1.96661e-05
Fermt2	9.24393e-10	-1.69592	0.108	0.343	2.02026e-05
Adipor1	1.05252e-09	-1.29224	0.294	0.547	2.30029e-05
Rcc2	1.14124e-09	1.16033	0.608	0.391	2.49419e-05
Cfap36	1.26277e-09	-0.560392	0.833	0.901	2.75978e-05
Btbd10	1.27949e-09	-0.852339	0.52	0.737	2.79632e-05
Adh5	1.29022e-09	-0.686214	0.765	0.883	2.81977e-05
Tmbim6	1.30621e-09	-1.03724	0.755	0.85	2.85472e-05
Atp5h	1.31836e-09	-0.317969	0.966	0.978	2.88128e-05
Cspg5	1.37988e-09	2.28552	0.324	0.109	3.01572e-05
Dclk1	1.41146e-09	0.764635	0.819	0.675	3.08475e-05
Zdhhc12	1.44829e-09	-1.13332	0.201	0.46	3.16524e-05
Ube2ql1	1.4821e-09	2.28831	0.289	0.084	3.23912e-05
Rpl12	1.50926e-09	0.37801	0.975	0.974	3.29848e-05
mt-Co2	1.5097e-09	0.225471	0.995	0.993	3.29945e-05
Txnrd3	1.54428e-09	-2.4328	0.059	0.27	3.37503e-05
Mab21l1	1.66851e-09	-2.31418	0.098	0.325	3.64653e-05
Atp6v1a	1.66878e-09	-0.934157	0.588	0.785	3.64712e-05
Rps12	1.72378e-09	0.371707	0.995	0.989	3.76731e-05
Slc38a1	1.77896e-09	0.875024	0.77	0.631	3.88791e-05
Tubb3	1.82273e-09	0.461918	1	0.989	3.98358e-05
9530077C05Rik	1.9378e-09	1.55886	0.495	0.274	4.23507e-05
Cartpt	2.37988e-09	-1.39967	0.779	0.854	5.20123e-05
Ccdc170	2.49927e-09	-3.14201	0.034	0.226	5.46215e-05
Rpl29	2.61737e-09	0.254078	0.99	0.985	5.72026e-05
Rbms3	2.68913e-09	-1.46513	0.172	0.423	5.87709e-05
Hprt	2.70936e-09	-0.853917	0.647	0.825	5.9213e-05
Trarg1	3.09973e-09	-3.03595	0.039	0.234	6.77445e-05
Hspb11	3.39072e-09	-0.718107	0.632	0.825	7.41041e-05
Arl14epl	3.39995e-09	1.10107	0.672	0.504	7.43059e-05
Lrrc59	3.46649e-09	-0.575645	0.809	0.912	7.57602e-05
Ptma	3.49626e-09	0.361366	1	0.993	7.64108e-05
Tle5	3.82717e-09	0.53859	0.956	0.894	8.36429e-05
Mphosph8	3.98572e-09	0.846772	0.814	0.712	8.7108e-05
Sec61g	4.16091e-09	0.332538	0.975	0.978	9.09367e-05
mt-Nd4	4.38599e-09	0.377721	0.985	0.978	9.58558e-05
Pde4a	4.47337e-09	-1.74655	0.162	0.394	9.77654e-05
Ywhah	4.632e-09	-0.495702	0.936	0.964	0.000101232
Ankrd44	4.67468e-09	-2.08932	0.083	0.307	0.000102165
Kctd8	4.77936e-09	-2.39476	0.054	0.259	0.000104453
Cpsf6	4.8509e-09	-0.660236	0.887	0.949	0.000106016
Prrg4	5.03848e-09	-4.20402	0.005	0.164	0.000110116
Prdx6	5.15788e-09	0.808884	0.863	0.701	0.000112725
Rps20	5.19468e-09	0.28893	0.99	0.989	0.00011353
Nsmce3	5.37491e-09	-0.874609	0.363	0.642	0.000117469
Adgrl1	5.38683e-09	-1.00088	0.525	0.748	0.000117729
Hs3st1	5.54811e-09	-1.84282	0.221	0.453	0.000121254
Acot13	5.59939e-09	-1.29061	0.348	0.562	0.000122375
Nrn1l	5.81159e-09	-1.49369	0.206	0.442	0.000127012
Mymk	5.96753e-09	3.33177	0.172	0.022	0.00013042
Hnrnpab	6.07503e-09	0.468179	0.961	0.923	0.00013277
Osbpl1a	6.32868e-09	-1.14034	0.466	0.664	0.000138313
Aldoa	6.40176e-09	-1.02404	0.603	0.77	0.00013991
Znrf1	6.56535e-09	0.801241	0.77	0.588	0.000143486
Fis1	7.05016e-09	-0.387039	0.931	0.956	0.000154081
Rpl36al	7.05784e-09	0.582883	0.941	0.923	0.000154249
Mpp6	7.20669e-09	1.05127	0.632	0.467	0.000157502
Fam174a	7.35984e-09	-0.6402	0.745	0.847	0.000160849
Slc25a33	7.45556e-09	-0.924687	0.5	0.712	0.000162941
Gng8	8.35371e-09	-0.483015	0.985	0.978	0.00018257
Mpc1	8.91275e-09	-0.447698	0.907	0.942	0.000194788
Gclc	9.35841e-09	-0.909063	0.436	0.639	0.000204528
Cbx3	9.89041e-09	0.484794	0.975	0.942	0.000216155
Bcap31	1.01911e-08	-0.718203	0.696	0.807	0.000222728
Mrln	1.08465e-08	-1.85027	0.118	0.336	0.000237049
Ctsl	1.09946e-08	-0.712761	0.49	0.734	0.000240286
Tspyl4	1.13037e-08	-0.698451	0.789	0.825	0.000247042
Snap91	1.13871e-08	-0.962106	0.353	0.613	0.000248865
Cldn9	1.23211e-08	-1.02926	0.392	0.657	0.000269277
Degs1	1.27302e-08	-1.69576	0.186	0.416	0.000278219
Rad23a	1.27685e-08	-0.875379	0.466	0.693	0.000279055
Kirrel2	1.31887e-08	-1.67669	0.225	0.46	0.00028824
Pdap1	1.33511e-08	0.336541	0.985	0.971	0.000291788
Uqcrb	1.52082e-08	-0.395932	0.946	0.974	0.000332374
Glul	1.58836e-08	-1.37484	0.191	0.434	0.000347136
Gm3448	1.6002e-08	-1.12471	0.284	0.544	0.000349723
Dio3	1.60529e-08	3.56401	0.157	0.018	0.000350837
Cldn23	1.62857e-08	-1.62904	0.142	0.372	0.000355923
Eci3	1.66869e-08	-2.45646	0.074	0.27	0.000364693
Mapk8ip1	1.82907e-08	-0.477129	0.882	0.945	0.000399744
Rps9	1.9482e-08	0.291079	1	0.982	0.000425778
Kcnk3	2.02579e-08	-2.72181	0.098	0.296	0.000442737
Psmb2	2.08662e-08	0.445091	0.971	0.953	0.000456032
Sept3	2.12546e-08	0.459671	0.956	0.869	0.000464519
Itm2b	2.12947e-08	0.710545	0.99	0.993	0.000465395
Ppp1r1a	2.13289e-08	-0.936467	0.623	0.752	0.000466143
Agpat3	2.15742e-08	-1.488	0.108	0.336	0.000471503
Ppp1r42	2.19678e-08	-2.50089	0.029	0.201	0.000480107
Yif1b	2.25425e-08	-0.812494	0.426	0.657	0.000492667
9330182L06Rik	2.31064e-08	-1.76324	0.118	0.336	0.00050499
Sec14l5	2.32942e-08	-1.45649	0.034	0.208	0.000509095
Selenok	2.60166e-08	0.327423	1	0.996	0.000568593
Gipc3	2.61106e-08	1.55755	0.412	0.197	0.000570648
Nras	2.73318e-08	0.924365	0.75	0.599	0.000597336
Slc22a4	2.74943e-08	4.91578	0.108	0	0.000600889
Map1lc3b	2.87419e-08	0.555427	0.99	0.978	0.000628154
Dusp26	2.89383e-08	0.785231	0.716	0.5	0.000632447
Gng12	2.92914e-08	-4.36846	0.01	0.161	0.000640164
Rpn2	3.07268e-08	0.700553	0.784	0.65	0.000671535
Ifi27l2a	3.16426e-08	-3.80124	0.176	0.383	0.000691548
Ppia	3.22363e-08	-0.232861	1	0.993	0.000704524
Cfap100	3.31715e-08	-2.23297	0.054	0.237	0.000724964
Eef1a1	3.62763e-08	0.287519	1	0.989	0.000792819
Phlda1	3.65491e-08	2.06568	0.279	0.095	0.000798782
Gabarapl2	3.71016e-08	-0.319238	0.971	0.974	0.000810857
Lhfpl1	3.86066e-08	3.07295	0.152	0.018	0.000843747
Rpl35a	3.90638e-08	0.257728	0.995	0.982	0.00085374
Eif1	3.92878e-08	-0.207771	1	0.989	0.000858634
Trp53rkb	3.99934e-08	-0.778648	0.554	0.763	0.000874057
Wdr33	4.00933e-08	-0.81809	0.373	0.624	0.000876239
Mtus2	4.27382e-08	1.40609	0.446	0.241	0.000934044
Rab3c	4.33106e-08	1.48495	0.544	0.354	0.000946553
B4galt4	4.33535e-08	-1.87774	0.054	0.241	0.000947491
Ech1	4.38662e-08	-1.0772	0.294	0.555	0.000958696
Sema6a	4.67292e-08	0.8572	0.667	0.464	0.00102127
Dnaja1	4.72828e-08	-0.29309	0.98	0.982	0.00103337
Wdsub1	4.89991e-08	-0.88245	0.515	0.697	0.00107088
Dnajc3	4.92464e-08	1.31658	0.637	0.5	0.00107628
Vamp8	5.44617e-08	-1.74901	0.123	0.332	0.00119026
Celf2	5.66095e-08	-2.45176	0.049	0.226	0.0012372
Rnf128	5.72957e-08	-1.29149	0.26	0.478	0.0012522
Tubb2b	5.77159e-08	0.309273	1	0.996	0.00126138
Rpl13	5.86975e-08	0.272262	0.995	0.996	0.00128283
Wnk1	5.87575e-08	-1.06121	0.525	0.715	0.00128414
Agpat4	5.99972e-08	-0.68012	0.618	0.796	0.00131124
Ppp1r11	6.16835e-08	-0.699745	0.613	0.814	0.00134809
Trim24	6.17892e-08	-1.09182	0.407	0.639	0.0013504
1700123O20Rik	6.23267e-08	-0.873389	0.446	0.642	0.00136215
Trps1	6.24704e-08	1.47717	0.431	0.226	0.00136529
Slc31a2	6.27575e-08	-1.70041	0.201	0.409	0.00137157
Cisd1	6.59321e-08	-0.584845	0.76	0.872	0.00144095
Cirbp	6.78844e-08	-0.294222	0.966	0.974	0.00148361
Abca5	6.82546e-08	-1.30856	0.137	0.365	0.0014917
4921524J17Rik	7.14565e-08	-0.800555	0.574	0.734	0.00156168
Chst11	7.24232e-08	-2.78972	0.034	0.201	0.00158281
Arf1	7.73155e-08	0.341402	0.975	0.96	0.00168973
Cdipt	7.86151e-08	-0.653036	0.672	0.832	0.00171813
Coq7	8.15103e-08	-0.936717	0.368	0.624	0.00178141
Eef1b2	8.37257e-08	0.396498	0.98	0.953	0.00182982
Sox13	8.42831e-08	2.53471	0.176	0.033	0.00184201
Bag1	8.4545e-08	-0.446079	0.848	0.938	0.00184773
Ndn	8.51864e-08	-1.69685	0.181	0.409	0.00186175
Mapt	8.56426e-08	0.638325	0.877	0.836	0.00187172
Rhou	8.65104e-08	1.37166	0.436	0.237	0.00189068
Basp1	8.66192e-08	0.380597	0.995	0.985	0.00189306
Ndufs8	8.67465e-08	-0.695598	0.51	0.719	0.00189585
Kdm6b	8.70569e-08	-0.787426	0.539	0.726	0.00190263
Slc12a2	8.9372e-08	-1.08861	0.598	0.723	0.00195322
Id4	9.9737e-08	-0.968902	0.319	0.599	0.00217975
Npnt	1.00674e-07	2.31589	0.201	0.047	0.00220024
Fmc1	1.02575e-07	-0.674994	0.52	0.755	0.00224177
Sap30l	1.05087e-07	-0.959141	0.407	0.646	0.00229668
Lpcat4	1.07934e-07	-1.02592	0.265	0.496	0.0023589
Kiz	1.12895e-07	-1.13096	0.304	0.526	0.00246733
Rps7	1.19328e-07	0.25037	1	0.985	0.00260792
Ube2e1	1.21743e-07	-0.50461	0.789	0.876	0.00266068
Ina	1.23349e-07	0.543	0.917	0.803	0.00269578
Tesc	1.25143e-07	0.219255	0.99	0.989	0.002735
Atp2b1	1.27724e-07	-0.645507	0.833	0.909	0.00279142
Ptprr	1.3166e-07	-1.80288	0.181	0.387	0.00287744
Lmo1	1.38145e-07	-0.712071	0.672	0.81	0.00301916
Got1	1.39171e-07	-0.9024	0.431	0.653	0.00304159
Tmem183a	1.3918e-07	-1.16248	0.176	0.409	0.00304179
Spry1	1.39714e-07	3.40965	0.176	0.036	0.00305345
Ndrg4	1.41506e-07	-0.94914	0.397	0.609	0.00309261
Abhd16a	1.48481e-07	-0.686799	0.755	0.85	0.00324506
Sdc2	1.49412e-07	-0.996776	0.466	0.661	0.00326541
Kit	1.501e-07	4.1122	0.118	0.007	0.00328043
Pak7	1.5582e-07	-1.27236	0.201	0.431	0.00340545
Tmem158	1.68451e-07	-1.15444	0.27	0.504	0.00368149
Fam221a	1.75427e-07	-1.81406	0.167	0.372	0.00383395
1810037I17Rik	1.80379e-07	-0.497439	0.877	0.916	0.00394218
Ptprn	1.81594e-07	-1.99519	0.064	0.245	0.00396873
Htatip2	1.85594e-07	-0.980725	0.436	0.657	0.00405615
Afap1	1.91347e-07	0.726755	0.784	0.664	0.00418189
Snapc5	1.93073e-07	-0.771712	0.525	0.745	0.00421961
Hagh	2.01046e-07	-0.690131	0.588	0.748	0.00439386
Nfe2l1	2.0238e-07	-0.471532	0.358	0.584	0.00442302
Tead1	2.06187e-07	0.959783	0.529	0.314	0.00450622
Mapk1ip1	2.0632e-07	-1.13606	0.127	0.339	0.00450911
Pomgnt2	2.08921e-07	-1.58674	0.176	0.387	0.00456597
Lgmn	2.1786e-07	-2.58706	0.039	0.197	0.00476132
Pdxp	2.27002e-07	1.25869	0.475	0.277	0.00496112
Nmt2	2.43658e-07	0.700489	0.779	0.668	0.00532515
Rnf4	2.44339e-07	0.767278	0.603	0.416	0.00534002
Tnrc6b	2.53595e-07	-0.829292	0.593	0.763	0.00554232
Diaph2	2.5491e-07	-1.33283	0.123	0.336	0.00557107
Elovl7	2.59328e-07	-1.84367	0.088	0.274	0.0056676
Rps28	2.64348e-07	0.255026	0.995	0.985	0.00577733
Sgpp1	2.67294e-07	-1.2127	0.088	0.281	0.00584171
Wnt16	2.68581e-07	4.17152	0.113	0.007	0.00586984
Maco1	2.76386e-07	0.84953	0.755	0.58	0.00604041
Bmp6	2.78504e-07	-1.0057	0.304	0.536	0.00608671
Rps27a	2.81362e-07	0.219538	0.995	0.989	0.00614916
Rpl38	2.86413e-07	0.214921	0.995	0.989	0.00625956
mt-Nd2	3.02018e-07	0.455914	0.975	0.945	0.0066006
Rnf145	3.06605e-07	0.664433	0.73	0.588	0.00670086
Npm1	3.1106e-07	0.396586	0.946	0.938	0.00679822
Rps5	3.13567e-07	0.264066	0.995	0.985	0.00685301
1700001L19Rik	3.25208e-07	-1.11943	0.284	0.5	0.00710742
Morn2	3.2587e-07	-0.636545	0.676	0.814	0.0071219
Abhd4	3.29698e-07	-2.47809	0.034	0.19	0.00720555
Abhd17b	3.38339e-07	-1.33576	0.108	0.31	0.00739441
Snrpg	3.41103e-07	0.359536	0.971	0.953	0.0074548
Ank	3.42359e-07	-1.37911	0.157	0.35	0.00748227
Gas6	3.55229e-07	-2.13096	0.123	0.307	0.00776353
Faim	3.64768e-07	-0.41739	0.917	0.942	0.007972
Rpl22	3.7485e-07	0.316517	0.985	0.982	0.00819235
Rassf3	3.82479e-07	-1.36807	0.108	0.303	0.00835908
Laptm4b	3.85445e-07	-2.23033	0.039	0.197	0.0084239
Rbm24	3.88948e-07	1.7939	0.216	0.062	0.00850046
Sdhaf3	3.91586e-07	-1.14906	0.211	0.431	0.00855811
Qdpr	4.14259e-07	0.432817	0.922	0.759	0.00905362
St6gal1	4.29623e-07	-2.07875	0.054	0.223	0.00938941
Ndp	4.30707e-07	-1.24652	0.113	0.307	0.00941311
Actg1	4.42965e-07	0.329301	0.995	0.978	0.009681
Ppp1r14b	4.60899e-07	-0.463902	0.926	0.956	0.010073
Sec11a	4.68294e-07	0.465511	0.922	0.942	0.0102346
Samm50	4.72794e-07	-0.687465	0.544	0.748	0.0103329
Dph6	4.91994e-07	-0.961704	0.304	0.515	0.0107525
Card19	5.08734e-07	-1.3669	0.137	0.336	0.0111184
Plac8	5.09306e-07	1.19479	0.618	0.471	0.0111309
1110008P14Rik	5.09627e-07	-0.576963	0.691	0.821	0.0111379
Jade1	5.29834e-07	-0.71593	0.358	0.58	0.0115795
Pgam1	5.33066e-07	-0.68063	0.691	0.796	0.0116502
Pcyt2	5.39335e-07	-0.837766	0.27	0.493	0.0117872
Crip1	5.5204e-07	-0.954078	0.412	0.635	0.0120648
Pon3	5.53823e-07	-1.06435	0.167	0.376	0.0121038
Arl6ip5	5.85988e-07	-0.612566	0.652	0.821	0.0128068
Rflnb	6.09125e-07	1.97405	0.216	0.062	0.0133124
Rpl6	6.12501e-07	0.272458	0.995	0.993	0.0133862
Arhgef3	6.25298e-07	-2.00259	0.074	0.241	0.0136659
Mad2l2	6.37368e-07	0.636034	0.784	0.617	0.0139297
Lrrn3	6.43463e-07	-2.45562	0.039	0.19	0.0140629
Dnajb14	6.55709e-07	-0.481154	0.495	0.686	0.0143305
Nnat	6.60146e-07	3.46968	0.132	0.018	0.0144275
Rpl8	6.67817e-07	0.231317	1	0.989	0.0145951
Snap25	6.76607e-07	-0.597631	0.706	0.843	0.0147873
Tshz2	6.99136e-07	-0.44686	0.873	0.96	0.0152796
Ppargc1a	7.11143e-07	-4.34098	0	0.113	0.015542
Sh3gl2	7.17477e-07	-0.941928	0.324	0.536	0.0156805
B3gat1	7.19905e-07	2.53861	0.162	0.033	0.0157335
Krt7	7.20897e-07	-2.63252	0.044	0.197	0.0157552
Tmem205	7.24471e-07	-0.691513	0.525	0.737	0.0158333
Wdr17	7.3748e-07	-1.14464	0.142	0.343	0.0161176
Scube3	7.43702e-07	2.40771	0.157	0.029	0.0162536
Pknox2	7.44283e-07	-3.43453	0.01	0.135	0.0162663
Zmynd8	7.63318e-07	1.7	0.632	0.464	0.0166823
Cmtm8	7.66285e-07	-1.99059	0.034	0.186	0.0167472
Cfap69	7.84164e-07	-1.08178	0.235	0.449	0.0171379
Ikzf4	8.19264e-07	1.58193	0.353	0.179	0.017905
Acyp2	8.31713e-07	-1.39477	0.113	0.296	0.0181771
Stbd1	8.49837e-07	0.427128	0.922	0.755	0.0185732
Ubtd1	8.69574e-07	-1.32102	0.23	0.434	0.0190045
Sult1d1	9.16555e-07	-1.94935	0.103	0.288	0.0200313
Casz1	9.19139e-07	-0.537551	0.686	0.85	0.0200878
Chd7	9.36039e-07	0.934422	0.652	0.482	0.0204571
Smap1	1.02242e-06	-0.41075	0.819	0.927	0.0223449
Rpl32	1.06022e-06	0.240218	1	0.985	0.0231711
1110017D15Rik	1.06822e-06	-0.684002	0.529	0.73	0.0233459
Pgpep1	1.06932e-06	-1.64315	0.123	0.303	0.02337
Pllp	1.07875e-06	-1.49958	0.152	0.35	0.023576
Csnk1g3	1.12105e-06	0.921617	0.627	0.482	0.0245006
Mapk3	1.15512e-06	-0.772825	0.505	0.697	0.0252452
Ccdc28b	1.18168e-06	-1.00466	0.392	0.599	0.0258256
Grk2	1.2141e-06	-1.0397	0.245	0.464	0.0265342
Pth2	1.22185e-06	-3.68904	0.025	0.157	0.0267035
Mxra7	1.27935e-06	-1.03792	0.358	0.558	0.0279602
Insm1	1.28865e-06	-0.718355	0.627	0.792	0.0281635
Aldoc	1.33196e-06	-1.05744	0.24	0.453	0.02911
Calr	1.3364e-06	-0.687247	0.574	0.818	0.029207
Cdhr1	1.35295e-06	-1.22938	0.211	0.405	0.0295687
Gadl1	1.35311e-06	-1.65155	0.083	0.263	0.0295722
mt-Nd3	1.38672e-06	0.354526	0.961	0.938	0.0303067
Fam107b	1.38756e-06	1.21556	0.446	0.263	0.0303251
Kcna6	1.42343e-06	-1.38954	0.26	0.438	0.031109
Arrb2	1.43623e-06	-0.75686	0.495	0.686	0.0313887
Prmt1	1.45392e-06	0.584052	0.804	0.679	0.0317754
Slc14a2	1.50662e-06	-1.51122	0.108	0.285	0.0329272
Hyou1	1.50918e-06	1.21497	0.495	0.332	0.0329831
Mvb12a	1.51847e-06	-0.887711	0.373	0.58	0.0331862
Rab11fip4	1.55102e-06	-1.43567	0.196	0.394	0.0338975
Ralyl	1.60934e-06	-1.83552	0.074	0.237	0.035172
Snn	1.63852e-06	0.750209	0.828	0.719	0.0358099
Tmem218	1.66167e-06	-0.902747	0.176	0.376	0.0363157
Lrrc58	1.70961e-06	0.90912	0.539	0.354	0.0373636
Rcan1	1.74624e-06	0.877286	0.608	0.46	0.0381641
Lpin2	1.75295e-06	-1.27044	0.176	0.383	0.0383108
Gyg	1.76495e-06	0.924324	0.725	0.653	0.0385729
Fau	1.78507e-06	0.163854	1	1	0.0390126
Nudt5	1.80895e-06	-1.00436	0.49	0.631	0.0395346
Creg1	1.81395e-06	-1.29062	0.186	0.391	0.0396439
Prune2	1.86103e-06	-0.797714	0.583	0.745	0.0406728
Lingo1	1.87064e-06	-1.91101	0.054	0.208	0.0408829
Psip1	1.92328e-06	0.260613	0.985	0.967	0.0420332
Cdkn1a	1.9802e-06	0.536632	0.966	0.953	0.0432773
H1f0	1.98965e-06	0.613218	0.858	0.697	0.0434839
Tspan18	2.09168e-06	-2.15401	0.029	0.164	0.0457137
Rps29	2.09317e-06	0.171952	1	1	0.0457463
Unc13c	2.1173e-06	-2.24308	0.034	0.175	0.0462736
Mgat5	2.12037e-06	0.852435	0.534	0.365	0.0463406
Satb2	2.13804e-06	1.28451	0.353	0.168	0.0467268
Asxl3	2.16294e-06	1.28107	0.407	0.223	0.0472711
Vav3	2.1804e-06	0.68048	0.755	0.617	0.0476526
Rps3	2.19948e-06	0.245028	1	0.982	0.0480697
Emc7	2.23918e-06	-0.680625	0.809	0.88	0.0489372
Tmem134	2.24505e-06	-0.370928	0.936	0.942	0.0490656
Rexo2	2.24814e-06	-0.495208	0.696	0.821	0.0491332
Nptn	2.27284e-06	-0.495604	0.676	0.825	0.049673
Khdrbs1	2.29201e-06	0.608215	0.799	0.766	0.050092
Galnt17	2.39377e-06	-2.09462	0.088	0.252	0.0523158
Tmem268	2.42259e-06	-2.83783	0.029	0.161	0.0529456
Manea	2.45744e-06	-1.03936	0.172	0.358	0.0537074
Etl4	2.49372e-06	-1.28042	0.221	0.401	0.0545002
Pik3cb	2.52157e-06	1.22623	0.314	0.142	0.0551089
Tmem237	2.5317e-06	-0.802235	0.338	0.547	0.0553302
Cux1	2.53746e-06	-0.727294	0.451	0.642	0.0554562
Hjurp	2.61328e-06	-0.634686	0.676	0.796	0.0571133
Sorbs1	2.63415e-06	1.34583	0.294	0.128	0.0575693
Zp3	2.69902e-06	4.9075	0.088	0.004	0.0589872
Pcdh19	2.70645e-06	-2.31911	0.132	0.296	0.0591494
Serf1	2.76965e-06	0.308773	0.966	0.945	0.0605307
Spef2	2.77625e-06	-1.11191	0.27	0.46	0.0606749
Klhl29	2.83843e-06	0.720231	0.333	0.157	0.0620338
Glo1	2.87049e-06	-0.995845	0.289	0.489	0.0627347
Dynlt1a	2.89533e-06	-0.622815	0.691	0.799	0.0632774
Nme5	2.96058e-06	-1.0442	0.328	0.529	0.0647034
Fbxo9	3.0433e-06	-0.590661	0.613	0.766	0.0665113
Maml3	3.06373e-06	-1.33069	0.137	0.328	0.0669578
Gmnn	3.08136e-06	-1.33366	0.191	0.387	0.067343
Cd9	3.19914e-06	-0.251415	0.922	0.96	0.0699172
Hsd17b11	3.29499e-06	-2.58926	0.029	0.157	0.072012
Yif1a	3.3027e-06	-0.852399	0.373	0.569	0.0721804
2210016L21Rik	3.30578e-06	-0.409774	0.775	0.887	0.0722479
Fam172a	3.31109e-06	-0.999251	0.265	0.471	0.0723639
Oscp1	3.49004e-06	-0.831582	0.382	0.591	0.0762749
Rpl26	3.51048e-06	0.190997	0.995	0.985	0.0767216
Cox5a	3.5905e-06	-0.225344	0.975	0.978	0.0784703
Mrpl17	3.62586e-06	-0.531826	0.686	0.839	0.0792431
B830017H08Rik	3.77493e-06	-1.76626	0.064	0.219	0.0825012
Tcp11l2	3.797e-06	-1.53092	0.152	0.328	0.0829834
Nln	3.90202e-06	1.28755	0.417	0.245	0.0852787
Maoa	3.95858e-06	-1.61098	0.074	0.234	0.0865147
Rpl28	4.15199e-06	0.304774	1	0.989	0.0907417
Plcg1	4.20328e-06	1.43527	0.25	0.095	0.0918626
Bex4	4.26101e-06	0.747585	0.662	0.478	0.0931243
Cdk14	4.2883e-06	-0.978003	0.328	0.515	0.0937207
Rps27	4.45585e-06	0.273243	1	0.978	0.0973827
Srsf9	4.4793e-06	0.488175	0.877	0.843	0.0978951
Pttg1	4.57278e-06	-1.2214	0.255	0.445	0.0999381
Mvk	4.607e-06	-0.519098	0.451	0.642	0.100686
Vil1	4.63073e-06	-1.20386	0.25	0.438	0.101205
Clasp1	4.69699e-06	0.98688	0.539	0.38	0.102653
Capsl	4.71159e-06	-1.74912	0.074	0.223	0.102972
Set	4.72397e-06	0.355154	0.936	0.942	0.103242
Csrp1	4.72581e-06	1.19843	0.436	0.241	0.103283
Pnmal1	4.74193e-06	-1.00687	0.363	0.536	0.103635
Arf4	4.79752e-06	0.430909	0.946	0.927	0.10485
Rit2	4.89243e-06	-3.16037	0.005	0.109	0.106924
Ssbp2	4.9244e-06	0.565587	0.931	0.945	0.107623
Nme1	5.07708e-06	0.748907	0.681	0.529	0.11096
Oaz1	5.16979e-06	-0.175881	0.985	0.982	0.112986
Sdk2	5.26286e-06	4.32707	0.074	0	0.11502
Cfap20	5.29628e-06	-0.358298	0.922	0.945	0.11575
Phlda3	5.32339e-06	1.49289	0.27	0.113	0.116343
Dennd2a	5.36685e-06	-3.15778	0.015	0.128	0.117292
Zpld2	5.50375e-06	-1.61452	0.387	0.533	0.120284
Cacna2d3	5.88905e-06	-1.85696	0.064	0.215	0.128705
Padi1	5.89248e-06	-3.26788	0.02	0.135	0.12878
Tmem59	6.00657e-06	-0.416516	0.961	0.953	0.131274
Uncx	6.02104e-06	-3.34849	0.015	0.128	0.13159
Pcdh8	6.02419e-06	1.32562	0.27	0.109	0.131659
Kdsr	6.03616e-06	-0.854885	0.328	0.533	0.13192
Rgs20	6.13547e-06	-1.35777	0.191	0.372	0.134091
Ascl4	6.15509e-06	-1.94714	0.049	0.19	0.134519
Ktn1	6.19746e-06	-0.585145	0.657	0.85	0.135446
Gstm5	6.26876e-06	-0.691179	0.446	0.657	0.137004
Hmgb2	6.75465e-06	-0.44829	0.77	0.887	0.147623
Pigc	6.99673e-06	-1.44116	0.103	0.27	0.152914
Stmn4	7.03199e-06	-0.686939	0.838	0.88	0.153684
P2rx4	7.10555e-06	-0.708189	0.475	0.672	0.155292
Golim4	7.17192e-06	0.95921	0.471	0.296	0.156742
Fam81a	7.25004e-06	-0.850189	0.328	0.522	0.15845
Wdr83os	7.25686e-06	-0.554698	0.642	0.788	0.158599
Pmepa1	7.27182e-06	-0.839446	0.402	0.588	0.158926
Rnpc3	7.45063e-06	-1.35298	0.201	0.372	0.162833
Fuca2	7.58451e-06	-1.63426	0.074	0.226	0.16576
Impdh1	7.75502e-06	-0.659842	0.77	0.807	0.169486
Frmd4a	7.95542e-06	0.661087	0.75	0.635	0.173866
Tulp4	7.98205e-06	0.555918	0.853	0.755	0.174448
Samd5	8.02163e-06	-1.97002	0.054	0.193	0.175313
Rab27b	8.05328e-06	3.08722	0.108	0.015	0.176005
Mettl26	8.11406e-06	-0.522736	0.593	0.774	0.177333
Myo6	8.28719e-06	-0.787553	0.598	0.745	0.181116
Dvl3	8.3201e-06	0.785558	0.662	0.493	0.181836
Ndufa11	8.40442e-06	-0.296044	0.941	0.956	0.183679
Pts	8.68695e-06	-0.752395	0.436	0.613	0.189853
Amer2	8.74645e-06	0.512842	0.814	0.715	0.191154
Ppp1r21	8.84261e-06	-0.995531	0.314	0.515	0.193255
Gpr85	9.02268e-06	-1.54466	0.093	0.248	0.197191
Scg5	9.20037e-06	-0.482758	0.819	0.832	0.201074
Hmgcs1	9.37097e-06	-0.744557	0.662	0.796	0.204803
Bend5	9.391e-06	1.04575	0.52	0.358	0.20524
Vim	9.50007e-06	0.319821	0.995	0.964	0.207624
Cfap300	9.52165e-06	1.05856	0.52	0.365	0.208096
Galm	9.57391e-06	2.17562	0.172	0.051	0.209238
Kcnb2	9.58589e-06	0.826517	0.245	0.095	0.2095
1700007K13Rik	9.67422e-06	-1.35581	0.181	0.35	0.21143
Pdk1	9.70327e-06	-1.10939	0.118	0.292	0.212065
Reps2	9.84997e-06	1.46773	0.314	0.15	0.215271
Pmpcb	9.86977e-06	-0.635242	0.534	0.686	0.215704
Rpl34	9.9073e-06	0.194664	0.995	0.989	0.216524
Asic2	1.00138e-05	2.93154	0.127	0.026	0.218853
Fgd2	1.00724e-05	-0.971952	0.289	0.46	0.220132
Kcnn2	1.01416e-05	-2.82193	0.029	0.15	0.221645
Pacsin3	1.04515e-05	-1.25336	0.186	0.369	0.228418
Akirin1	1.0856e-05	-0.540276	0.725	0.821	0.237259
Magt1	1.08639e-05	0.974	0.515	0.369	0.237431
Serpinb6a	1.09803e-05	-0.447845	0.735	0.858	0.239974
Flt1	1.10831e-05	5.1344	0.069	0	0.242222
Dhrs13	1.13382e-05	-0.939419	0.225	0.423	0.247796
Cgnl1	1.17767e-05	3.60588	0.088	0.007	0.257381
Pde6d	1.18063e-05	-0.423968	0.775	0.901	0.258026
B3gat3	1.22162e-05	-0.571943	0.466	0.653	0.266984
Gm14226	1.24085e-05	3.76471	0.078	0.004	0.271188
Scap	1.24789e-05	-0.695628	0.446	0.657	0.272727
Crabp1	1.27745e-05	-1.37623	0.368	0.551	0.279188
Osbpl8	1.28292e-05	0.797355	0.613	0.518	0.280383
Bhlhe41	1.30437e-05	-1.62523	0.083	0.234	0.28507
Dlx5	1.31941e-05	0.374269	0.956	0.887	0.288356
Rps13	1.34136e-05	0.188247	0.99	0.985	0.293154
Mex3d	1.34302e-05	0.622589	0.593	0.398	0.293516
Golga7b	1.35358e-05	-0.636093	0.466	0.646	0.295825
Pls3	1.35797e-05	-1.51789	0.088	0.241	0.296785
Mrps12	1.37167e-05	-0.626802	0.574	0.752	0.299779
Vmn1r35	1.37612e-05	-10.9637	0	0.091	0.300752
Cbx4	1.41466e-05	-0.797368	0.559	0.675	0.309174
Dctn6	1.4227e-05	-0.410961	0.691	0.803	0.310931
H4c14	1.44871e-05	-0.964406	0.397	0.588	0.316616
Cfap206	1.45543e-05	-1.25356	0.083	0.241	0.318085
Trim35	1.45854e-05	-0.515672	0.804	0.88	0.318763
Tsnax	1.47826e-05	0.319295	0.951	0.894	0.323074
Bpnt1	1.54299e-05	-0.665297	0.5	0.661	0.337219
Fam114a2	1.54841e-05	-0.509084	0.75	0.861	0.338404
H2az1	1.55942e-05	0.357072	0.995	0.967	0.340811
Cdkl4	1.56201e-05	-0.860893	0.245	0.427	0.341378
Cdh2	1.57309e-05	0.262926	0.917	0.872	0.343799
Med22	1.60065e-05	0.847081	0.578	0.409	0.349821
Ppib	1.6051e-05	0.438273	0.99	0.985	0.350795
Klhdc1	1.60793e-05	-1.37388	0.172	0.336	0.351413
Gpr45	1.65933e-05	1.35886	0.363	0.208	0.362646
Gnas	1.667e-05	0.248346	0.995	0.982	0.364322
Rnf213	1.68512e-05	-0.711895	0.211	0.398	0.368283
Yes1	1.68997e-05	-1.56256	0.123	0.285	0.369342
Erh	1.69302e-05	0.398967	0.936	0.901	0.37001
Glud1	1.72742e-05	0.800071	0.52	0.361	0.377528
Dmtn	1.73524e-05	-1.06256	0.294	0.464	0.379237
Dclk2	1.75297e-05	1.18614	0.333	0.179	0.383113
Ier3	1.75369e-05	2.31484	0.162	0.047	0.38327
Dynlt3	1.77237e-05	-0.45562	0.76	0.832	0.387352
Lamp1	1.80014e-05	-0.350435	0.931	0.931	0.393421
Sox12	1.86628e-05	-1.25404	0.172	0.339	0.407876
Arl4a	1.90245e-05	-0.506096	0.534	0.741	0.415781
Cers5	1.90856e-05	-0.594634	0.578	0.734	0.417116
Ly96	1.91261e-05	-1.65172	0.059	0.193	0.418001
Klf9	1.91472e-05	-0.936312	0.221	0.412	0.418462
Pfkl	1.9415e-05	-1.20621	0.108	0.27	0.424315
Nipsnap3b	1.94918e-05	-0.720423	0.451	0.635	0.425994
Spcs1	1.96018e-05	-0.38118	0.902	0.931	0.428398
Prps1	1.97589e-05	-0.75303	0.402	0.569	0.431831
Acads	1.99551e-05	0.884064	0.456	0.296	0.43612
Tmcc2	2.01746e-05	-0.882735	0.319	0.5	0.440917
Snx21	2.10293e-05	-1.11047	0.216	0.387	0.459596
Inafm2	2.14407e-05	-0.78982	0.549	0.679	0.468587
Hivep1	2.14855e-05	-0.643109	0.265	0.453	0.469566
Bcam	2.17178e-05	-0.886798	0.078	0.223	0.474642
Slc6a4	2.21753e-05	2.31457	0.118	0.022	0.484641
Edf1	2.21912e-05	-0.292125	0.946	0.964	0.484989
Gabbr2	2.25406e-05	-0.955471	0.338	0.518	0.492625
Tox3	2.27856e-05	-1.56034	0.186	0.339	0.49798
Ggact	2.29388e-05	-2.32273	0.039	0.161	0.501327
Dnah9	2.34498e-05	-1.88964	0.039	0.161	0.512495
Ctxn1	2.34929e-05	0.316293	0.922	0.934	0.513437
Carhsp1	2.36879e-05	0.759334	0.588	0.42	0.5177
Rassf9	2.37379e-05	-1.83675	0.078	0.219	0.518792
Odf2	2.39343e-05	-0.496743	0.647	0.796	0.523085
Id3	2.41506e-05	0.789905	0.642	0.449	0.527812
Eif1a	2.44554e-05	0.878211	0.578	0.427	0.534473
Bnip3	2.45719e-05	-0.671621	0.686	0.814	0.537019
Dock4	2.51147e-05	1.11953	0.422	0.266	0.548882
Ywhag	2.54307e-05	0.850325	0.75	0.639	0.555787
Trappc6a	2.54524e-05	0.461247	0.853	0.828	0.556262
Shisa5	2.57002e-05	-0.885131	0.275	0.46	0.561678
Akap1	2.57746e-05	0.95583	0.412	0.245	0.563305
Tmsb4x	2.75e-05	0.202989	1	1	0.601012
Bace1	2.75548e-05	-0.78984	0.48	0.653	0.602211
Pigp	2.77227e-05	-0.346743	0.853	0.916	0.60588
Ppp2r2b	2.77944e-05	-0.416496	0.701	0.847	0.607447
Myo1e	2.7818e-05	-0.911786	0.26	0.438	0.607962
Ell3	2.81787e-05	-0.591311	0.456	0.646	0.615845
Snrpd1	2.81932e-05	0.393413	0.971	0.923	0.616162
Clmp	2.84129e-05	1.33049	0.358	0.201	0.620964
D430042O09Rik	2.84289e-05	-0.842972	0.304	0.489	0.621313
Ttc33	2.85456e-05	0.859453	0.706	0.591	0.623864
Trim47	2.9189e-05	3.36749	0.098	0.015	0.637927
Stard4	2.95451e-05	-0.948711	0.196	0.369	0.645708
Tsen15	2.96914e-05	-0.441	0.51	0.712	0.648906
Vps33b	3.00404e-05	-0.704311	0.27	0.456	0.656533
Pomgnt1	3.01459e-05	-0.928185	0.23	0.412	0.658839
Ltk	3.04874e-05	-1.19997	0.172	0.347	0.666301
Dpf3	3.05822e-05	3.00766	0.098	0.015	0.668373
Elmo1	3.06592e-05	-2.40531	0.049	0.172	0.670056
Hsdl2	3.0828e-05	-0.671523	0.172	0.361	0.673745
March2	3.13068e-05	-0.474836	0.588	0.741	0.68421
Aip	3.16401e-05	-0.794106	0.24	0.423	0.691494
Efcab10	3.1765e-05	-0.50559	0.534	0.719	0.694224
Fblim1	3.23855e-05	1.7308	0.235	0.102	0.707786
Mfge8	3.26489e-05	0.608433	0.838	0.759	0.713542
Dnajc19	3.3007e-05	-0.425837	0.632	0.763	0.721368
Syn1	3.32136e-05	-1.55674	0.137	0.292	0.725883
Auh	3.32394e-05	-0.533459	0.721	0.799	0.726447
Dnaja4	3.3333e-05	-3.24008	0.01	0.102	0.728492
Naca	3.33351e-05	0.221571	0.985	0.982	0.728539
Pfkp	3.35365e-05	-2.46992	0.015	0.113	0.73294
Steap2	3.36061e-05	-1.81432	0.049	0.175	0.734461
Uba52	3.36544e-05	0.39641	0.922	0.901	0.735516
Rragd	3.38311e-05	-0.748431	0.549	0.675	0.739379
Acsl6	3.39641e-05	-0.806105	0.348	0.526	0.742285
Rtn3	3.52883e-05	-0.322409	0.912	0.945	0.771226
Fam13c	3.53119e-05	-0.624846	0.397	0.599	0.771741
Lgals3bp	3.53518e-05	-1.8946	0.039	0.157	0.772614
Rac3	3.61278e-05	0.344569	0.887	0.887	0.789573
Trim2	3.61612e-05	0.616564	0.613	0.474	0.790303
Impa1	3.62998e-05	-0.616407	0.319	0.518	0.793333
Cobl	3.66982e-05	-3.70353	0.005	0.091	0.80204
Lrp10	3.70067e-05	-0.820777	0.255	0.438	0.808782
Rpl18	3.70805e-05	0.193317	0.99	0.985	0.810394
Rsu1	3.77279e-05	-0.726195	0.333	0.522	0.824543
Bin1	3.77863e-05	-0.750461	0.397	0.577	0.825819
Wscd2	3.90842e-05	3.58314	0.088	0.011	0.854184
Rnaseh2b	3.95948e-05	-0.810263	0.279	0.471	0.865345
Tsc22d3	3.96313e-05	1.01168	0.417	0.259	0.866142
Mau2	3.98843e-05	-0.89225	0.255	0.442	0.871671
Fahd1	4.00439e-05	-1.13715	0.221	0.387	0.875159
Sik3	4.0514e-05	-0.819657	0.333	0.5	0.885433
Abcg1	4.2131e-05	1.26498	0.358	0.208	0.920772
Rpl39	4.22484e-05	0.168797	0.995	0.993	0.923339
Hid1	4.2453e-05	0.853756	0.431	0.285	0.92781
Gfra1	4.25629e-05	2.26829	0.157	0.047	0.930211
mt-Co1	4.3049e-05	0.203578	0.995	0.985	0.940836
Leng8	4.39904e-05	-0.290646	0.917	0.942	0.96141
Dad1	4.50692e-05	-0.272211	0.897	0.953	0.984987
Commd6	4.51116e-05	-0.569806	0.603	0.741	0.985915
Ehd1	4.52516e-05	0.930177	0.529	0.394	0.988973
Cers2	4.54318e-05	-2.38498	0.02	0.12	0.992912
Sptbn4	4.57043e-05	-1.38983	0.083	0.223	0.998867
Acp2	4.60299e-05	-1.24908	0.162	0.325	1
Scand1	4.6128e-05	-0.347264	0.892	0.942	1
Smim14	4.62336e-05	0.412899	0.848	0.828	1
Fam45a	4.65382e-05	-1.05057	0.211	0.38	1
Cplx2	4.66425e-05	-0.622225	0.485	0.639	1
Ahcyl2	4.78548e-05	-0.912497	0.328	0.518	1
Tnfrsf21	4.78731e-05	-0.66087	0.426	0.591	1
Dcx	4.85931e-05	0.574295	0.843	0.763	1
Fech	4.8763e-05	-1.81958	0.029	0.139	1
Cep70	4.896e-05	0.95892	0.475	0.318	1
Exoc6b	4.90787e-05	-0.638078	0.382	0.58	1
Mab21l2	4.92401e-05	2.77375	0.103	0.018	1
Aftph	4.9312e-05	-1.31541	0.402	0.558	1
Cks1b	4.9608e-05	1.62475	0.255	0.12	1
Kif1a	5.01247e-05	-0.412023	0.765	0.85	1
Dlx6	5.04314e-05	0.879015	0.637	0.536	1
Ndrg1	5.16832e-05	1.17933	0.235	0.099	1
Atl3	5.20296e-05	-1.41717	0.167	0.328	1
Mycbp	5.34124e-05	-0.480343	0.652	0.766	1
Nsmf	5.35401e-05	-0.706207	0.426	0.588	1
Dcaf17	5.39379e-05	-0.784855	0.245	0.416	1
Ecel1	5.40434e-05	-4.55659	0	0.077	1
Arpc5l	5.44563e-05	-0.242544	0.966	0.974	1
Cmip	5.46725e-05	1.40096	0.245	0.109	1
Tmcc3	5.46843e-05	-0.557748	0.48	0.664	1
Sema3e	5.46901e-05	-2.90148	0.01	0.099	1
Rabac1	5.52985e-05	-0.30063	0.863	0.945	1
Epcam	5.56439e-05	0.271859	0.99	0.985	1
Cd34	5.60885e-05	3.51939	0.069	0.004	1
Ift27	5.68041e-05	-0.443687	0.686	0.796	1
Klf2	5.69983e-05	1.70974	0.216	0.091	1
Actr1b	5.70061e-05	-0.345584	0.882	0.949	1
Krt90	5.71859e-05	-1.11754	0.211	0.369	1
Mast2	5.76549e-05	-0.951462	0.049	0.172	1
Lage3	5.77772e-05	-0.542865	0.485	0.657	1
Kcnk12	5.87921e-05	3.23498	0.069	0.004	1
Igf1	5.91339e-05	-1.92463	0.015	0.109	1
Cd164	5.92504e-05	-0.781836	0.353	0.529	1
Mcub	5.93311e-05	-2.48379	0.034	0.142	1
Prrg2	6.02102e-05	-0.803208	0.338	0.522	1
Fbln1	6.21204e-05	2.57516	0.108	0.022	1
Hes6	6.2148e-05	1.31489	0.51	0.401	1
Spon1	6.22346e-05	-3.36677	0.005	0.088	1
Tpo	6.36193e-05	-2.70917	0.005	0.088	1
Mapk10	6.40886e-05	0.622153	0.647	0.522	1
Sgpp2	6.56132e-05	1.07904	0.402	0.248	1
Tgoln1	6.66021e-05	-0.743521	0.49	0.657	1
Slc4a4	6.69585e-05	-3.5259	0.015	0.106	1
Ccdc184	6.72128e-05	-0.974119	0.456	0.613	1
Cntn1	6.75515e-05	-0.746749	0.328	0.511	1
Zmat5	6.85555e-05	-0.773897	0.382	0.544	1
Rassf7	6.90942e-05	-0.917291	0.211	0.376	1
Emc8	6.97688e-05	-0.6789	0.407	0.584	1
Abhd3	6.98708e-05	-1.26946	0.181	0.339	1
Prxl2c	7.03427e-05	-1.25041	0.24	0.427	1
Med13l	7.11902e-05	-0.855276	0.338	0.5	1
Rps23	7.13784e-05	0.155502	1	0.989	1
Dhcr24	7.14397e-05	-0.75432	0.245	0.416	1
Fos	7.15555e-05	-0.763862	0.627	0.745	1
Elk4	7.16916e-05	0.636416	0.319	0.175	1
Gpd1l	7.21065e-05	-0.569697	0.27	0.453	1
Hecw2	7.21716e-05	-0.908036	0.176	0.347	1
Slc16a9	7.22251e-05	-2.04548	0.02	0.117	1
Adam10	7.22977e-05	0.827215	0.48	0.325	1
Wasf3	7.23875e-05	-2.83565	0.015	0.106	1
Sdhaf4	7.24048e-05	-0.31059	0.814	0.887	1
Gin1	7.28705e-05	-0.769409	0.255	0.445	1
Zfp91.1	7.32565e-05	-0.431118	0.422	0.606	1
Zfp64	7.32894e-05	-1.47574	0.118	0.263	1
Rps11	7.34116e-05	0.193827	1	0.989	1
Uxs1	7.39123e-05	-0.830988	0.407	0.555	1
Klc2	7.3931e-05	-0.668302	0.51	0.653	1
Epb41l3	7.85104e-05	0.839185	0.578	0.445	1
Gpat3	7.85886e-05	-0.996461	0.206	0.372	1
Usp43	7.86917e-05	-2.50169	0.02	0.117	1
Ndufa8	7.90477e-05	0.359728	0.941	0.942	1
Map4k4	7.95427e-05	0.581901	0.721	0.635	1
Cadm1	8.06665e-05	0.507376	0.794	0.726	1
Eef1d	8.23491e-05	-0.457776	0.711	0.81	1
Acat2	8.29388e-05	-0.589385	0.172	0.343	1
Bmp7	8.35973e-05	0.904994	0.559	0.416	1
Tmsb10	8.40742e-05	0.241687	1	0.993	1
Prrc2b	8.71606e-05	-0.353715	0.956	0.989	1
Mmp2	8.76855e-05	-2.9553	0.01	0.095	1
Amacr	8.77806e-05	-1.18912	0.069	0.197	1
Atp6v0e2	8.87282e-05	-0.627481	0.402	0.591	1
Kcnq3	8.87309e-05	0.707361	0.48	0.31	1
Rdx	8.87845e-05	0.753408	0.76	0.657	1
Fcho2	8.89278e-05	-0.882322	0.284	0.445	1
Ggt5	8.89726e-05	-2.13731	0.015	0.106	1
Bicdl2	8.96078e-05	-1.52149	0.064	0.186	1
Sqle	8.97105e-05	-0.64724	0.456	0.624	1
Vmac	9.23624e-05	-0.661458	0.324	0.504	1
Eno1	9.25279e-05	-0.521432	0.672	0.781	1
Brdt	9.35699e-05	-0.677827	0.578	0.675	1
Nudc	9.45509e-05	-0.290378	0.897	0.931	1
mt-Nd1	9.47363e-05	0.147547	0.995	0.993	1
Smarca2	9.48081e-05	-1.08534	0.088	0.23	1
Ssr3	9.54906e-05	0.599417	0.735	0.664	1
Nkiras1	9.586e-05	-0.732004	0.299	0.482	1
Ppp1r2	9.63386e-05	-0.305125	0.843	0.916	1
Rpl5	9.70824e-05	0.295847	0.975	0.953	1
Stmn2	9.72582e-05	0.231833	1	0.993	1
Vamp1	9.81686e-05	-1.55722	0.103	0.241	1
Mat2b	9.81926e-05	-0.376345	0.819	0.876	1
Angptl6	9.84552e-05	-0.993596	0.152	0.31	1
Abracl	9.84677e-05	1.36969	0.343	0.201	1
Tnik	9.8497e-05	0.681617	0.632	0.511	1
Tgif1	9.91118e-05	1.59912	0.167	0.058	1
Stk40	9.97639e-05	-0.610259	0.284	0.453	1
Eci1	9.98893e-05	-1.198	0.152	0.303	1
Tspan3	0.000100777	-0.309513	0.882	0.909	1
Ccne1	0.000101419	2.21069	0.118	0.029	1
Actn1	0.000102961	-1.00153	0.206	0.372	1
Rims4	0.000103149	3.82406	0.054	0	1
Sh3rf3	0.000103149	4.38759	0.054	0	1
Fam98c	0.000104064	-0.502584	0.598	0.77	1
Myo1d	0.000106135	-1.28259	0.157	0.307	1
Ubxn1	0.000106741	-0.228316	0.956	0.956	1
F11r	0.000107675	0.574564	0.745	0.642	1
Cflar	0.000108245	-0.420341	0.765	0.872	1
Ddx50	0.000108725	0.452979	0.809	0.715	1
Zdhhc18	0.000109198	-0.862371	0.265	0.42	1
Tmem219	0.000109472	-0.979301	0.132	0.281	1
Tfg	0.000110175	0.451622	0.789	0.712	1
Cldnd1	0.00011048	-0.459426	0.73	0.839	1
Efcab15	0.000110505	-0.801095	0.279	0.449	1
Cbx8	0.000110621	-0.975974	0.294	0.453	1
Rpl3	0.000110693	0.219246	0.985	0.985	1
Smpdl3a	0.00011115	-0.389004	0.132	0.281	1
Igsf21	0.000111971	1.21497	0.289	0.146	1
Tmem160	0.0001159	-0.500051	0.461	0.65	1
mt-Nd4l	0.000115901	0.659046	0.75	0.679	1
Slc38a2	0.000117117	0.334983	0.907	0.854	1
Ddx17	0.000118253	0.620859	0.74	0.628	1
Rnf31	0.000119146	-1.31067	0.064	0.19	1
Hsph1	0.00011941	-1.88433	0.044	0.153	1
Zfand2b	0.000120004	-0.597735	0.402	0.591	1
Sinhcaf	0.000120173	0.692389	0.662	0.566	1
Zdhhc8	0.000120215	-0.934297	0.235	0.394	1
Hmgn2	0.000120729	-0.463024	0.721	0.85	1
Sdccag8	0.00012103	-1.32596	0.118	0.255	1
BC049352	0.000121057	-0.387541	0.735	0.847	1
Znfx1	0.000121857	1.24103	0.338	0.204	1
Fibp	0.000122361	-0.711291	0.402	0.547	1
Pde1c	0.000122965	-1.22293	0.289	0.442	1
N4bp2l1	0.000123364	-1.54049	0.083	0.208	1
Bcar3	0.000123593	-1.7848	0.069	0.186	1
Faah	0.000124937	-1.60937	0.132	0.266	1
Gse1	0.000125648	0.683162	0.745	0.65	1
P4htm	0.000125671	-0.593488	0.191	0.358	1
Fuom	0.000125856	-1.41454	0.093	0.223	1
Mbnl1	0.000125873	-1.14804	0.191	0.336	1
Epb41l1	0.000126478	-1.55743	0.074	0.197	1
Fam49a	0.000126987	-2.499	0.015	0.102	1
Gm9925	0.000127046	-3.40249	0	0.069	1
Tmem159	0.000127847	-0.870063	0.25	0.416	1
Fam124a	0.000128962	-1.16287	0.132	0.274	1
Slc35f4	0.000132872	-3.15124	0.01	0.091	1
Borcs8	0.000135241	-0.458	0.657	0.763	1
Zfp579	0.000136296	0.895667	0.382	0.234	1
Rab28	0.000138654	-0.367011	0.755	0.836	1
Sh3bp4	0.000140702	1.41543	0.368	0.237	1
Spef1	0.00014143	-0.72983	0.275	0.434	1
Clstn1	0.0001423	-0.427005	0.892	0.931	1
Cacfd1	0.000142798	-0.662697	0.328	0.507	1
Skil	0.000143253	-0.956829	0.206	0.369	1
Commd3	0.000143333	0.686008	0.657	0.555	1
Rtkn	0.000146062	-2.6362	0.025	0.117	1
Cxcr4	0.000146118	2.62463	0.088	0.015	1
Mlec	0.000147003	0.817044	0.382	0.241	1
Slc48a1	0.000149305	-0.4865	0.48	0.639	1
Triqk	0.000149322	-0.741135	0.324	0.493	1
Gdap1	0.000150327	-0.480412	0.691	0.792	1
Osbpl3	0.000152655	-1.32429	0.118	0.252	1
Ncoa1	0.000154942	-0.490489	0.657	0.792	1
Rassf8	0.00015569	-2.26767	0.034	0.135	1
Samd14	0.000155929	-0.501384	0.466	0.617	1
Nav1	0.00015625	-0.445489	0.603	0.73	1
Prorsd1	0.000157004	-1.18149	0.132	0.27	1
Pdia4	0.000159291	0.977793	0.539	0.42	1
Mpv17	0.000159291	-0.751035	0.294	0.464	1
Med8	0.000160703	-0.383339	0.667	0.814	1
Ldhb	0.000160984	0.205369	0.99	0.985	1
Mapk4	0.000161964	-0.935116	0.225	0.391	1
Rnf32	0.000162117	1.40547	0.304	0.168	1
Tmed10	0.000165163	0.361519	0.931	0.956	1
Scn8a	0.000165767	-1.45738	0.103	0.234	1
9530068E07Rik	0.000172648	-0.575696	0.426	0.635	1
Ptprs	0.000173175	-0.450263	0.833	0.916	1
Tapbp	0.000173931	-1.07371	0.348	0.474	1
BC005624	0.000176906	-0.390776	0.73	0.828	1
Rps27l	0.00017706	0.362474	0.951	0.942	1
Nt5c3	0.000177347	-1.4011	0.162	0.303	1
Sema3a	0.000177592	1.01392	0.475	0.347	1
Usp20	0.000177938	-1.66738	0.034	0.135	1
Memo1	0.000179616	-1.16265	0.245	0.394	1
Pitpnm2	0.000180329	2.87083	0.078	0.011	1
Hsd17b7	0.000182826	-0.869401	0.162	0.318	1
Nrxn1	0.000182843	-0.381715	0.917	0.971	1
Tspan17	0.000183891	-0.660798	0.382	0.544	1
Idh3a	0.000185455	-0.565497	0.534	0.675	1
Sdcbp	0.00018609	-0.388275	0.804	0.872	1
Ebf3	0.000186636	-0.404248	0.922	0.949	1
Tspoap1	0.000187494	-1.19745	0.186	0.332	1
Sorl1	0.000187692	-1.00654	0.289	0.453	1
Rtn4rl1	0.000190019	-1.00628	0.191	0.343	1
Rpl41	0.000192017	0.111541	1	0.996	1
Ppfia1	0.000192331	-0.697148	0.265	0.442	1
Mrps16	0.000192812	-0.470053	0.333	0.5	1
Mageh1	0.000193365	-0.544572	0.52	0.653	1
Fam50a	0.000196311	-0.725955	0.309	0.482	1
Zfp112	0.000197377	-0.708547	0.294	0.453	1
Sh3bgrl	0.000198213	-0.258168	0.966	0.985	1
Cib2	0.000199688	-1.04916	0.147	0.296	1
Enpp5	0.000200413	-0.911572	0.225	0.369	1
Cdc37	0.000201071	-0.417921	0.76	0.869	1
Csnk1e	0.000203904	0.382093	0.887	0.832	1
Slc35a1	0.000209019	-1.22331	0.078	0.204	1
Ankrd13a	0.000209184	-0.633758	0.412	0.566	1
Wdr54	0.000209531	-0.77655	0.328	0.482	1
Efhd2	0.000210167	1.11198	0.328	0.193	1
Lrrc6	0.000211631	-2.09425	0.039	0.139	1
Ndufb3	0.000213877	-0.325894	0.902	0.938	1
Rpl27	0.000214312	0.157131	0.985	0.982	1
Psma5	0.000217419	-0.362528	0.848	0.923	1
Fam189b	0.000221024	-0.833157	0.201	0.361	1
H2bu2	0.000221296	0.206598	0.961	0.942	1
Fbxo45	0.000222137	-0.779863	0.26	0.434	1
Fgf18	0.000222696	-2.15078	0.02	0.106	1
Guk1	0.000224072	0.412409	0.922	0.912	1
Cnga3	0.000224513	-2.894	0.005	0.077	1
Nxn	0.000224789	0.834939	0.456	0.318	1
Fndc3b	0.000226146	-2.5933	0.005	0.077	1
Bag2	0.000226323	-1.49322	0.049	0.157	1
Stx2	0.000230875	-0.385845	0.735	0.832	1
Chchd10	0.00023224	-0.558909	0.721	0.839	1
Cdk6	0.000232244	-1.08155	0.078	0.201	1
Zfp423	0.000232543	1.19736	0.294	0.168	1
Eprs	0.000233333	-0.442701	0.725	0.821	1
Anxa4	0.000233806	-1.1911	0.142	0.277	1
Camk2b	0.000235601	1.33883	0.167	0.062	1
Scd2	0.000238359	-0.757933	0.348	0.504	1
Rps10	0.000239016	0.218124	0.98	0.974	1
Dpm1	0.000240407	-0.343404	0.721	0.828	1
Tefm	0.000241266	-1.70508	0.054	0.161	1
Pten	0.000244244	-0.501575	0.588	0.726	1
Tanc1	0.000249445	-2.3004	0.02	0.106	1
Itpkc	0.000249858	1.08495	0.309	0.175	1
Psenen	0.000251116	-0.35822	0.848	0.912	1
H2-Ke6	0.000251799	-0.619832	0.417	0.562	1
Ankrd11	0.000252098	0.508957	0.833	0.799	1
Tcn2	0.000255256	-1.12818	0.064	0.179	1
Pim1	0.000257327	0.386659	0.873	0.803	1
Skap2	0.000259337	-0.620917	0.25	0.42	1
Acvr2a	0.000260181	1.38163	0.176	0.069	1
Enkur	0.000260273	-0.677614	0.338	0.507	1
Nudcd2	0.000260351	-0.596687	0.373	0.551	1
Jdp2	0.000267241	-1.67973	0.059	0.164	1
Unc5b	0.000270099	-1.25134	0.167	0.31	1
Mpp1	0.000270099	-0.852661	0.201	0.354	1
Gstp1	0.00027411	-0.513657	0.123	0.263	1
Dnajb3	0.000275402	-0.668035	0.284	0.453	1
Arhgap17	0.000279959	-0.940577	0.27	0.427	1
Eaf1	0.000280527	-0.529972	0.593	0.734	1
Orai3	0.000280916	-1.34849	0.093	0.215	1
Capns2	0.000281531	-2.77718	0.015	0.095	1
Atcay	0.000282144	-0.778491	0.049	0.157	1
Ahi1	0.000282771	-0.274139	0.799	0.88	1
Rpl15	0.000286881	0.136636	0.995	0.985	1
Hip1r	0.00028949	-0.828792	0.181	0.318	1
Rps24	0.000290622	0.172847	1	0.985	1
G3bp2	0.000290987	0.488521	0.657	0.573	1
Pwwp2b	0.000293089	-2.47971	0.025	0.113	1
Iqub	0.000296244	-1.09516	0.088	0.212	1
Rnh1	0.000296428	-0.51731	0.613	0.73	1
Wdr53	0.00029663	-0.85977	0.181	0.328	1
Kcnn1	0.000297513	-1.9527	0.049	0.15	1
Pbx4	0.000298803	-0.665772	0.074	0.197	1
Grsf1	0.000300295	-0.673708	0.392	0.551	1
Tex264	0.000300576	-0.514686	0.574	0.785	1
Arpin	0.000301489	-1.93865	0.025	0.113	1
Scrn1	0.000303231	-0.488131	0.539	0.675	1
Wdr38	0.000303307	-1.977	0.049	0.15	1
Tbc1d10c	0.000303378	-1.93277	0.049	0.153	1
Selenoo	0.000303614	-1.1727	0.113	0.245	1
Rufy3	0.000305101	-0.273099	0.951	0.964	1
Rpl31	0.000307603	0.223259	0.99	0.967	1
Nptx2	0.000309131	-1.6282	0.044	0.146	1
Fgf9	0.000311615	-1.19257	0.093	0.219	1
Dhrs7b	0.000314569	-1.06181	0.23	0.387	1
Ric3	0.000316643	-1.05634	0.186	0.328	1
Fndc3a	0.000320265	0.490224	0.603	0.511	1
Mpp7	0.000321051	-0.593154	0.27	0.431	1
Snx22	0.000322446	-1.0687	0.191	0.332	1
Selenot	0.000323381	-0.600418	0.603	0.708	1
Tmem128	0.000325269	0.4776	0.794	0.766	1
Mia3	0.000329635	-0.386363	0.799	0.865	1
Smim5	0.0003326	-1.1408	0.093	0.212	1
Btf3	0.00033274	0.128927	0.985	0.982	1
Tmod3	0.000339146	1.10557	0.373	0.245	1
Hsd17b4	0.000339827	-0.530012	0.402	0.562	1
Mindy4	0.000341199	-1.68009	0.025	0.113	1
Ccl25	0.000341299	-0.610667	0.363	0.533	1
Lmna	0.000341926	-0.955719	0.137	0.27	1
Samd12	0.000342062	-2.93022	0.005	0.073	1
Bscl2	0.000342891	-0.764646	0.206	0.361	1
Gadd45gip1	0.000343384	-0.437201	0.588	0.723	1
Zfp40	0.000343543	-1.90826	0.029	0.12	1
Il13ra1	0.000346083	-2.28822	0.02	0.102	1
Tnrc18	0.000348041	1.5886	0.255	0.135	1
Slc43a2	0.000348429	0.726767	0.505	0.35	1
D430019H16Rik	0.000353378	1.03208	0.377	0.241	1
Arl3	0.000355844	-0.300468	0.897	0.923	1
Mfsd11	0.000361497	-0.893992	0.152	0.296	1
Ncam1	0.000369083	-0.21748	0.99	1	1
Dlg1	0.000369129	-0.250204	0.245	0.391	1
Scp2	0.000371582	-0.404934	0.833	0.869	1
Erf	0.000372852	-0.9559	0.152	0.296	1
Nap1l5	0.000372879	-0.883924	0.127	0.259	1
Med11	0.000375238	-1.0327	0.142	0.281	1
Otub1	0.000377711	0.271301	0.926	0.898	1
Psmc3	0.000378611	-0.484582	0.632	0.777	1
Zfp235	0.00038095	-0.508332	0.137	0.274	1
Hnrnpa0	0.000383175	0.377398	0.897	0.85	1
Habp4	0.000383575	-1.22594	0.093	0.215	1
Exoc6	0.000388769	-0.906611	0.186	0.325	1
Relb	0.000391627	-2.12657	0.02	0.102	1
Klhdc2	0.000398752	0.394411	0.902	0.88	1
Gpr137c	0.000403041	-0.967164	0.176	0.321	1
Fetub	0.000403833	-0.91613	0.681	0.766	1
Nrbp2	0.000404745	-0.756268	0.294	0.445	1
Mtx2	0.000409127	-0.500583	0.515	0.679	1
P4hb	0.000410421	0.611126	0.681	0.573	1
Snx3	0.000414519	-0.292354	0.868	0.901	1
Rfx3	0.00041648	-0.724549	0.407	0.558	1
Dnajc8	0.000416664	0.381565	0.838	0.763	1
Rfx2	0.000417677	-1.44855	0.044	0.142	1
Psph	0.000419016	-0.823927	0.23	0.387	1
Mpdz	0.000419682	-1.21288	0.059	0.164	1
Emc2	0.000425144	-0.452798	0.578	0.745	1
Togaram2	0.000426624	-1.94781	0.029	0.117	1
Stim1	0.000427722	-0.850485	0.123	0.263	1
Eya4	0.000428684	2.98204	0.093	0.015	1
Rpl7a	0.00042977	0.175945	0.99	0.982	1
Ciapin1	0.000431	0.495458	0.583	0.46	1
Igfbp5	0.000433262	1.4208	0.26	0.128	1
Ankrd54	0.000434049	-0.809496	0.225	0.376	1
Plppr3	0.000435123	0.33735	0.74	0.631	1
Ddr1	0.000435436	1.02939	0.26	0.139	1
Dnajb2	0.000441271	-0.658259	0.475	0.609	1
Mea1	0.000442465	-0.582817	0.451	0.624	1
Nat14	0.000442855	-0.620276	0.51	0.65	1
Med21	0.000446138	-0.378001	0.897	0.891	1
Atad1	0.000449264	-0.820953	0.333	0.493	1
Ccl27a	0.00044958	-0.500284	0.559	0.712	1
Mitd1	0.000450554	-0.790994	0.279	0.434	1
Fhit	0.000454442	1.92832	0.162	0.066	1
Nme6	0.000455051	-1.1094	0.069	0.179	1
Mrpl51	0.000455792	-0.227485	0.858	0.887	1
Sprn	0.000456146	-3.79053	0	0.058	1
Ntrk1	0.000457103	4.07371	0.044	0	1
Cmya5	0.000457103	3.29386	0.044	0	1
Naxd	0.000457809	-0.352486	0.848	0.898	1
Ube2e3	0.000458565	-0.345093	0.593	0.734	1
Ptk2b	0.000459208	-1.58998	0.025	0.109	1
Rnf115	0.000459718	-0.437056	0.456	0.639	1
Jtb	0.000459925	-0.3007	0.637	0.737	1
Gstm4	0.000460258	-2.4821	0.02	0.099	1
Dio2	0.000460258	-2.71364	0.02	0.099	1
Plxna1	0.000465348	-0.809309	0.377	0.511	1
Ensa	0.000465765	-0.566825	0.368	0.529	1
Tdrd7	0.000469487	-0.622144	0.064	0.172	1
Dctn3	0.000470449	-0.213567	0.961	0.974	1
Slco3a1	0.000476018	-1.32846	0.142	0.266	1
Abhd2	0.000478023	-0.316183	0.76	0.865	1
Srpk2	0.000482355	0.378659	0.951	0.905	1
AI987944	0.000483583	-1.01917	0.152	0.281	1
Ivns1abp	0.00048386	0.474962	0.696	0.599	1
Cacna1d	0.000489293	-0.959678	0.176	0.318	1
Itpka	0.000495191	-2.51843	0.005	0.069	1
Acadl	0.000496057	-1.10647	0.074	0.186	1
Lsm3	0.000499763	0.570142	0.716	0.639	1
Pcyox1	0.000500028	-0.933646	0.358	0.504	1
Yipf1	0.000501345	-0.427227	0.544	0.693	1
Mfsd14a	0.000501543	-0.670583	0.456	0.584	1
Map3k6	0.000503387	-1.05737	0.078	0.197	1
Slc16a11	0.000507479	0.475733	0.74	0.609	1
Sin3b	0.000511195	-0.326847	0.897	0.92	1
Stmn3	0.000511689	-0.174335	0.995	0.989	1
Vwa3b	0.000513795	-1.18354	0.044	0.142	1
Rab21	0.000515301	-0.648508	0.51	0.62	1
Mbl2	0.000520074	-1.81349	0.034	0.124	1
Emc4	0.000520228	-0.524722	0.657	0.774	1
Tstd3	0.000520566	-2.32794	0.02	0.099	1
Prelid2	0.000522612	-1.00773	0.196	0.332	1
Isoc1	0.000523604	0.280916	0.828	0.763	1
Adam22	0.000524496	-1.07294	0.103	0.23	1
Gast	0.000528296	2.68419	0.054	0.004	1
Chl1	0.000528311	-2.62776	0.005	0.069	1
Dtd2	0.000528719	-0.719372	0.309	0.482	1
Bhlhe40	0.000529153	-1.06427	0.127	0.263	1
Swt1	0.000531356	-0.801779	0.284	0.445	1
Pcm1	0.000532818	-0.558776	0.672	0.763	1
Rab24	0.000539752	-0.41734	0.701	0.832	1
Stxbp6	0.000540434	1.19309	0.333	0.19	1
Dnajc17	0.000541349	-1.04896	0.132	0.263	1
Ebna1bp2	0.000543266	-0.616988	0.588	0.712	1
Map1lc3a	0.00054881	-0.293185	0.931	0.96	1
Pgs1	0.000551743	0.557777	0.696	0.624	1
Faim2	0.000552761	-2.14732	0.113	0.226	1
Tmx3	0.000555313	-0.616792	0.559	0.682	1
Tmem230	0.00055682	-0.515656	0.613	0.752	1
Celsr1	0.000559285	1.18085	0.113	0.033	1
Rnf6	0.000564882	-0.604182	0.578	0.664	1
Emx2	0.000566172	0.291109	0.917	0.872	1
Rasip1	0.000572788	-1.03574	0.196	0.332	1
Map1b	0.000572965	0.165587	1	0.993	1
Cend1	0.000575189	-0.632159	0.529	0.65	1
Rtp4	0.000583169	-1.09041	0.216	0.354	1
Leprot	0.000583661	-0.548007	0.471	0.617	1
Marveld3	0.000584219	1.92769	0.127	0.044	1
Inpp1	0.000588285	-0.719301	0.118	0.252	1
Ccdc157	0.000590458	-0.928362	0.275	0.416	1
Rasgef1a	0.000590796	-1.69129	0.044	0.139	1
3830406C13Rik	0.000592753	-0.745652	0.353	0.478	1
Mef2b	0.000596282	-0.468952	0.525	0.675	1
Arl4c	0.000597876	1.34997	0.284	0.172	1
St14	0.000598841	-0.545395	0.377	0.555	1
Golm1	0.000600141	0.332252	0.755	0.701	1
Abca1	0.000601092	1.81574	0.123	0.04	1
Sec13	0.000603768	0.603965	0.564	0.474	1
Pgrmc1	0.000606359	-0.564547	0.495	0.642	1
Galnt16	0.000608408	2.4148	0.098	0.026	1
Tm2d2	0.000612651	-0.3476	0.794	0.88	1
Jam3	0.000617022	-1.24616	0.108	0.226	1
Kdm1a	0.000617997	0.361316	0.863	0.854	1
Ap1s1	0.000619807	-0.468029	0.681	0.792	1
Eef2k	0.000620518	0.524862	0.76	0.682	1
Mcee	0.000623665	0.535636	0.686	0.573	1
Necab3	0.000624558	-1.14156	0.039	0.131	1
Bex1	0.000632639	0.386176	0.75	0.668	1
Neo1	0.000634728	-2.26042	0.049	0.146	1
Cyp20a1	0.00063578	-0.68315	0.328	0.493	1
Lgi1	0.000641879	1.70393	0.225	0.117	1
Gdf15	0.000648019	-2.15409	0.039	0.128	1
Atp2c1	0.000648414	-0.552821	0.613	0.741	1
Dlgap1	0.000648522	-2.56398	0.02	0.095	1
Tmem132a	0.000654442	0.570319	0.181	0.077	1
Il10rb	0.000656647	-2.3895	0.034	0.12	1
Znhit1	0.000662074	-0.35533	0.779	0.85	1
Nt5c2	0.000669475	-0.792311	0.24	0.391	1
Ralgds	0.000673035	0.661765	0.681	0.613	1
Zfp672	0.000673128	-0.864754	0.186	0.325	1
Kif13b	0.000673343	2.3176	0.083	0.018	1
Ppp1r18	0.000677898	2.48444	0.083	0.018	1
Sub1	0.000678628	-0.272596	0.941	0.964	1
Cdk2ap2	0.000678673	0.792544	0.559	0.467	1
Ccdc181	0.000682445	-0.805823	0.137	0.281	1
Rgs12	0.000689799	0.668782	0.417	0.266	1
Dnajc9	0.000694989	-0.378129	0.52	0.679	1
Cbx6	0.000698217	-0.614714	0.309	0.456	1
Scn3a	0.000707535	0.397794	0.794	0.719	1
Gm11808	0.000708923	0.302149	0.931	0.909	1
Ctsa	0.000715981	-0.698054	0.392	0.515	1
Arap2	0.000725256	-0.752248	0.343	0.485	1
Babam2	0.000729908	-1.24849	0.118	0.241	1
Pafah1b1	0.000732968	-0.213811	0.956	0.96	1
Vwa3a	0.000737543	-2.73571	0.005	0.066	1
Ebpl	0.000738749	-1.07956	0.211	0.354	1
Gtpbp6	0.000739359	-0.945399	0.211	0.336	1
Syngr3	0.000739984	-0.641093	0.255	0.409	1
Eif4a2	0.000741806	-0.306726	0.819	0.887	1
Ppdpf	0.000744521	-0.328689	0.887	0.967	1
Neurl1a	0.000744622	0.936848	0.422	0.307	1
Eps15	0.0007501	-0.74934	0.294	0.442	1
Atp8b4	0.000750392	-0.59733	0.392	0.54	1
Enox1	0.00075272	-0.5515	0.294	0.46	1
Dcdc2a	0.000753798	-1.47517	0.069	0.168	1
Rpl24	0.000754089	0.158254	1	0.989	1
Ociad1	0.000754337	-0.555244	0.569	0.686	1
Ctsd	0.00075593	-0.795317	0.27	0.416	1
2210016F16Rik	0.000756219	-0.654115	0.304	0.456	1
Ap1ar	0.00076011	-0.373399	0.701	0.807	1
Ociad2	0.000760531	-0.81657	0.132	0.263	1
Mmgt2	0.00076232	-0.611873	0.382	0.533	1
Pknox1	0.000768169	-0.498273	0.176	0.314	1
Emc10	0.000769791	-0.326877	0.77	0.891	1
Smim1	0.000773932	-0.755646	0.176	0.318	1
Cfl1	0.000779154	0.180279	0.985	0.974	1
Carns1	0.000780165	-0.723356	0.157	0.292	1
Uba5	0.000780422	0.482243	0.696	0.584	1
Pard6b	0.000781102	-2.56464	0.005	0.066	1
Sigirr	0.000784887	-1.54475	0.039	0.128	1
Ogt	0.000785394	0.538938	0.701	0.62	1
Eef2	0.000791529	0.25777	0.985	0.978	1
Hey1	0.000794681	2.03656	0.142	0.055	1
Dalrd3	0.000797497	0.554693	0.534	0.416	1
Cdip1	0.000797635	-0.660257	0.368	0.518	1
Tspan6	0.000797732	1.08862	0.368	0.252	1
Lamtor3	0.000802564	-0.39445	0.681	0.792	1
Ccs	0.000803337	0.753034	0.407	0.285	1
Borcs7	0.000805467	-0.501543	0.52	0.628	1
Foxo3	0.000812114	-1.18608	0.157	0.281	1
Cbx2	0.000813934	0.665696	0.446	0.318	1
Matn2	0.000817496	-1.58912	0.049	0.142	1
Rsph1	0.000823046	-0.583288	0.451	0.599	1
Ccdc47	0.000823546	-1.00965	0.235	0.372	1
Pex11b	0.000824392	-0.83024	0.279	0.445	1
Stxbp3	0.000826347	-0.911896	0.167	0.299	1
Ctr9	0.000827107	-0.488908	0.525	0.664	1
Kifap3	0.000828437	-0.274788	0.897	0.942	1
Atic	0.000832891	-0.799866	0.172	0.31	1
Tmem147	0.000835815	-0.545691	0.412	0.562	1
Sco2	0.000841609	-0.671073	0.221	0.361	1
Zfp398	0.000845025	-0.716916	0.26	0.398	1
Lyplal1	0.000852858	-0.912192	0.142	0.266	1
Cdc42ep3	0.000857029	0.791237	0.446	0.321	1
Sept8	0.000858191	-0.456467	0.358	0.5	1
Vps28	0.000862907	-0.398677	0.735	0.825	1
Cdyl	0.000863771	-0.653749	0.422	0.551	1
Myo18a	0.000872923	2.57463	0.118	0.04	1
Slit1	0.000873917	-1.32233	0.083	0.19	1
Coprs	0.000874427	-0.307154	0.343	0.507	1
Ndufb6	0.000875124	-0.254749	0.868	0.905	1
Mmp15	0.000877916	-0.757246	0.25	0.401	1
Hdac11	0.000878151	-0.651197	0.412	0.566	1
Plekhb2	0.000880587	-0.903284	0.162	0.292	1
Pdlim1	0.000883597	1.07694	0.088	0.022	1
Tarsl2	0.000890751	-0.802642	0.279	0.42	1
Notch1	0.000892993	3.5359	0.059	0.007	1
Ica1l	0.00089414	-1.36092	0.069	0.172	1
Akap12	0.000896657	0.535899	0.676	0.584	1
Pxmp2	0.000900357	3.03659	0.059	0.007	1
D930048N14Rik	0.000902811	-1.07359	0.044	0.139	1
Arhgef28	0.000903617	-0.603326	0.495	0.624	1
Map4	0.000911443	-0.671054	0.397	0.547	1
Hcn2	0.000914689	-0.832148	0.196	0.332	1
Scn3b	0.000926459	0.45085	0.696	0.599	1
Tpi1	0.000935467	-0.5375	0.74	0.821	1
Homer3	0.0009367	1.10283	0.279	0.164	1
Kpna1	0.000941977	-0.57629	0.373	0.54	1
Slc9a3r1	0.000942509	-0.717303	0.299	0.434	1
Cd74	0.00094315	0.136747	0.054	0.033	1
Nedd4	0.000947307	0.364701	0.877	0.748	1
Scrn3	0.000949766	-0.900844	0.113	0.23	1
Myo5b	0.000961986	-1.15158	0.147	0.27	1
Polr3c	0.000962526	-0.409504	0.152	0.285	1
Krcc1	0.00096462	-0.315276	0.701	0.847	1
Tacc2	0.000964676	3.37977	0.039	0	1
Sucla2	0.000970212	-0.360142	0.711	0.818	1
Vmn1r85	0.000974315	-6.5662	0.034	0.102	1
Pcmtd2	0.000978546	-0.55709	0.387	0.533	1
Tub	0.000984182	-0.719588	0.338	0.467	1
Ccdc163	0.000997827	-1.72572	0.025	0.102	1
Sh3glb2	0.000998265	-0.283531	0.873	0.923	1
Rapgef2	0.000999606	-0.863192	0.245	0.372	1
Pkn1	0.00100817	-0.819881	0.294	0.434	1
Foxn3	0.00101788	0.429147	0.206	0.099	1
Kdelr1	0.00101877	0.506104	0.608	0.522	1
Acbd7	0.00102103	-0.681408	0.583	0.661	1
Rsph9	0.00102337	-0.449215	0.613	0.712	1
Ptbp2	0.00102349	0.555188	0.618	0.464	1
1110059G10Rik	0.0010337	-0.335506	0.569	0.686	1
Efcab6	0.00104458	-1.87983	0.034	0.117	1
Slc3a2	0.00104757	-0.431671	0.574	0.723	1
9430038I01Rik	0.00105155	-1.33654	0.103	0.215	1
Tango2	0.00105555	-0.375433	0.255	0.401	1
Mpp2	0.00106198	-0.944343	0.181	0.31	1
Mcc	0.00106594	-2.19026	0.02	0.091	1
Diras1	0.00106716	-0.949091	0.152	0.277	1
Nmnat1	0.00106861	-3.08444	0	0.051	1
Tkt	0.00107273	-0.2563	0.368	0.529	1
Actb	0.00107279	0.16186	1	0.985	1
Psap	0.001075	-0.329348	0.917	0.927	1
Atp5e	0.00107783	0.178935	0.98	0.978	1
Smim19	0.00108094	-0.747668	0.25	0.387	1
Luc7l	0.00108101	0.57937	0.681	0.642	1
As3mt	0.00108322	-1.35413	0.113	0.226	1
5730409E04Rik	0.00108682	2.82389	0.049	0.004	1
Sptbn2	0.00109152	0.896767	0.343	0.23	1
Vezf1	0.00109323	0.833398	0.461	0.354	1
Akr1e1	0.0010959	-0.75008	0.196	0.328	1
Gm12216	0.00111689	2.64766	0.049	0.004	1
Plxdc2	0.0011175	1.05596	0.181	0.084	1
Enpp1	0.00111969	0.781561	0.402	0.285	1
Nipal2	0.00111976	-0.606034	0.338	0.489	1
Pttg1ip	0.00112212	-0.752852	0.245	0.394	1
Myt1	0.00112349	1.18393	0.211	0.106	1
Cenpw	0.00112735	1.04908	0.25	0.135	1
Rpl23a	0.00113397	0.218865	0.975	0.982	1
Dnajb12	0.00113954	-0.717386	0.343	0.478	1
Cdkl3	0.00113986	-0.531119	0.466	0.624	1
Stx3	0.00114083	-0.548179	0.49	0.642	1
Tom1l1	0.00114437	-0.61283	0.275	0.423	1
Cds1	0.00115427	-0.791926	0.23	0.365	1
B3galt1	0.00115724	1.30986	0.176	0.08	1
Psmd4	0.00115877	-0.285053	0.843	0.905	1
Fstl3	0.00116272	-1.29669	0.157	0.277	1
Plekhf2	0.00116612	-0.458036	0.206	0.35	1
Surf4	0.00117008	0.372575	0.613	0.518	1
Ears2	0.00117109	-2.60377	0.005	0.062	1
Exosc5	0.00117352	-0.674871	0.338	0.471	1
Tyw5	0.00117881	-0.849525	0.127	0.248	1
Ufd1	0.00117903	-0.355052	0.436	0.588	1
Rragc	0.00118095	-0.279554	0.529	0.668	1
Mrpl32	0.00118415	-0.277639	0.775	0.854	1
Uqcrq	0.0011885	-0.169225	0.975	0.967	1
Iqce	0.00119215	-0.872725	0.26	0.398	1
Mlf2	0.00119476	-0.314176	0.863	0.891	1
Tmem243	0.00119656	-0.519972	0.593	0.726	1
Phf10	0.00120047	-0.436168	0.363	0.511	1
Ube2h	0.00120159	0.939796	0.642	0.577	1
Pithd1	0.00120376	-0.513033	0.539	0.682	1
Phf7	0.00120465	-0.986504	0.093	0.204	1
Tlk1	0.00120615	-0.301299	0.407	0.577	1
Pkm	0.00121186	-0.275396	0.956	0.949	1
Dtx1	0.00121529	-0.491242	0.598	0.723	1
Gsr	0.00121758	-0.512473	0.412	0.584	1
Pfn2	0.00122877	-0.327687	0.814	0.898	1
Ecpas	0.0012313	-0.881681	0.211	0.35	1
Hacd1	0.00123316	-0.410053	0.623	0.752	1
Echdc1	0.00124342	-1.22501	0.088	0.193	1
Dazap1	0.0012491	0.345976	0.765	0.715	1
Seh1l	0.00124969	0.700921	0.485	0.383	1
Snapin	0.00125209	-0.470864	0.422	0.569	1
Ube2s	0.0012545	-0.178617	0.985	0.989	1
Sap30	0.00125512	0.670587	0.647	0.558	1
Rnpepl1	0.00125556	-0.454731	0.554	0.664	1
Mfsd1	0.00126307	-0.442067	0.441	0.606	1
Snrpd2	0.00127244	-0.236786	0.931	0.953	1
Psmd2	0.00127699	-0.318006	0.701	0.821	1
Kif3c	0.00127855	-0.478478	0.314	0.449	1
Pex13	0.0012803	-0.292218	0.436	0.609	1
Sri	0.00128232	-0.314626	0.377	0.533	1
M6pr	0.00128725	-0.39213	0.294	0.445	1
Rbm4b	0.00129288	-0.447481	0.755	0.85	1
Rpl18a	0.00129621	0.199908	0.995	0.982	1
Pitpnb	0.00130359	-0.544433	0.431	0.591	1
Atp6v1e1	0.00130651	-0.283797	0.897	0.942	1
Rps18	0.00130989	0.135625	0.99	0.985	1
Cdk4	0.00132652	0.592146	0.701	0.602	1
Cntn4	0.00132915	-0.503194	0.882	0.869	1
Ngrn	0.00133113	-0.338969	0.667	0.788	1
Pet100	0.00133128	-0.250217	0.662	0.796	1
Supt3	0.00133857	-0.592809	0.289	0.434	1
Gm21988	0.00133897	-1.23785	0.069	0.164	1
Nbdy	0.00134101	0.650365	0.461	0.339	1
Ciao2a	0.00134148	-0.413178	0.627	0.715	1
Fam13a	0.00134759	-0.830057	0.172	0.303	1
0610009B22Rik	0.00134797	-0.339871	0.647	0.763	1
Thop1	0.00135517	-0.694007	0.387	0.522	1
Atpif1	0.00136277	-0.141692	0.99	0.989	1
Rell1	0.00136624	-1.3988	0.078	0.175	1
Pptc7	0.00136763	-0.696341	0.176	0.31	1
Coa6	0.00137025	-0.581681	0.397	0.529	1
Agpat2	0.00137077	-2.31065	0.015	0.08	1
Syt16	0.00137146	-1.0138	0.088	0.193	1
4930430F08Rik	0.00137597	-0.649471	0.172	0.314	1
Crtc2	0.00137637	-1.23764	0.074	0.175	1
Rmnd5b	0.00137862	-0.634819	0.348	0.489	1
Cstf2t	0.00139438	-1.01149	0.142	0.266	1
Ccdc32	0.00139724	-0.517967	0.441	0.599	1
Mslnl	0.00140366	-0.664736	0.23	0.372	1
Ppp1r15a	0.00141057	-0.410358	0.431	0.58	1
Ddrgk1	0.00141198	-0.364972	0.74	0.821	1
Wapl	0.00141649	0.556211	0.779	0.766	1
Pex3	0.001421	-1.09191	0.196	0.328	1
Blvra	0.00143414	-0.657241	0.176	0.318	1
Prkar1a	0.00144338	-0.331811	0.858	0.923	1
Rp2	0.00144411	-0.447914	0.157	0.292	1
Nudt18	0.00145665	-0.799137	0.132	0.252	1
Utrn	0.00146441	-1.97069	0.059	0.15	1
Fbxw17	0.0014756	0.909147	0.275	0.161	1
Rab2b	0.00147675	-0.804284	0.201	0.328	1
Txnrd2	0.00147676	-1.05964	0.162	0.285	1
Rida	0.00148289	-1.39209	0.093	0.193	1
Mycl	0.00149076	-1.26876	0.083	0.186	1
Qpct	0.00149489	-1.40682	0.137	0.245	1
Sfmbt1	0.00150041	-0.907662	0.123	0.241	1
Trim45	0.00150648	-1.11475	0.123	0.237	1
Rplp2	0.00151236	0.17316	0.99	0.978	1
Spock1	0.00151978	-0.406693	0.917	0.916	1
Plk2	0.00152967	-0.805831	0.235	0.372	1
Galnt3	0.00154205	-1.01231	0.206	0.332	1
Fdx1	0.00154245	-0.430366	0.431	0.595	1
1110059E24Rik	0.00154664	-1.01108	0.064	0.161	1
Hist1h2ap	0.00155251	-1.49887	0.064	0.157	1
Arpc3	0.00157515	-0.214268	0.917	0.971	1
Pno1	0.00158346	-0.442289	0.319	0.474	1
Vmn2r2	0.0015839	-0.313866	0.078	0.018	1
Mapre2	0.00158633	-0.297543	0.794	0.869	1
Ublcp1	0.00159112	0.727335	0.495	0.38	1
Maged2	0.00159133	-0.562087	0.475	0.624	1
Car11	0.0015954	-0.75	0.123	0.237	1
Map3k19	0.00159921	-1.55725	0.054	0.142	1
Wsb1	0.00160524	0.676401	0.475	0.361	1
Ydjc	0.00160552	0.723648	0.314	0.193	1
Pard6a	0.0016095	-0.499449	0.275	0.423	1
Csmd1	0.00160988	-1.84208	0.034	0.113	1
Trim37	0.00161001	-0.499926	0.461	0.609	1
Ankrd13d	0.00162007	-1.42471	0.054	0.142	1
6330403K07Rik	0.00162258	0.958138	0.368	0.255	1
Arhgef19	0.00162777	-2.22606	0.02	0.088	1
Cngb1	0.00163225	-1.41566	0.069	0.164	1
Rgs7bp	0.00163615	-3.23444	0	0.047	1
Lrriq1	0.00163621	-0.48441	0.358	0.496	1
Slc39a9	0.00163741	-1.91871	0.059	0.146	1
Epb41	0.0016432	-0.611197	0.564	0.701	1
Lysmd1	0.00164539	-0.732076	0.118	0.237	1
Slc22a17	0.00165098	-0.672641	0.49	0.642	1
Ski	0.0016516	0.746417	0.451	0.365	1
Tsc22d4	0.00165288	-0.503279	0.422	0.599	1
Mrfap1	0.00165445	-0.200384	0.922	0.931	1
Fam217a	0.00166293	-0.927717	0.235	0.354	1
Tmem33	0.00166323	-0.537572	0.613	0.686	1
Caap1	0.00167257	-0.532846	0.525	0.642	1
Cmpk1	0.00167457	-0.177893	0.926	0.942	1
Fam229b	0.00167853	-0.780812	0.211	0.343	1
Ttc3	0.00168018	0.269617	0.912	0.927	1
S100z	0.00169386	-0.874349	0.706	0.781	1
Hlcs	0.00170773	-0.713865	0.309	0.46	1
Rab8b	0.00171151	1.28374	0.162	0.073	1
Pkd1	0.00172341	-0.934464	0.123	0.237	1
Sybu	0.00172884	-0.864753	0.078	0.179	1
Iqgap2	0.00173287	1.9009	0.098	0.033	1
Rps2	0.00174934	0.161896	0.985	0.989	1
Pdxk	0.00175104	-1.84258	0.02	0.088	1
Fmnl2	0.00175177	0.662307	0.5	0.409	1
Exoc7	0.00175713	-0.506719	0.279	0.423	1
Stk39	0.00176169	-0.537288	0.436	0.602	1
Ifi35	0.00177096	-0.893059	0.172	0.296	1
Elavl3	0.00177135	0.170147	0.975	0.985	1
Akap17b	0.00179345	0.395454	0.632	0.544	1
Tmem60	0.00179625	-0.286758	0.402	0.54	1
Fbxl17	0.00181122	-0.977517	0.137	0.248	1
Azi2	0.00181362	-0.484643	0.441	0.595	1
Ap3m2	0.00181527	0.952883	0.328	0.208	1
Otud1	0.00181876	-1.17339	0.049	0.135	1
Cpsf4	0.00183815	-1.26174	0.113	0.219	1
Lsr	0.00184204	-0.442796	0.569	0.668	1
Fahd2a	0.00184226	-0.528914	0.27	0.416	1
Gbp7	0.00184457	-2.50563	0.005	0.058	1
Lsamp	0.00184965	-0.775878	0.304	0.427	1
Sec16b	0.00186222	2.66324	0.054	0.007	1
Sh2d5	0.00186605	-1.46371	0.059	0.146	1
Klhl31	0.00187621	-0.514486	0.093	0.193	1
Rap1a	0.00187754	-0.414496	0.681	0.799	1
Riiad1	0.00187912	-0.686501	0.397	0.522	1
Fnbp1	0.00188358	-0.941264	0.118	0.23	1
Ranbp10	0.00189712	-1.71049	0.064	0.153	1
Tmem199	0.00190432	-0.37894	0.446	0.606	1
Tspo	0.00191696	-0.578658	0.338	0.5	1
Derl3	0.00192306	2.76694	0.054	0.007	1
Pigyl	0.00193077	-0.534219	0.412	0.562	1
Gm43517	0.00193191	0.681412	0.48	0.358	1
Cox14	0.00193568	-0.338499	0.745	0.81	1
H2-DMb2	0.0019373	-1.85691	0.039	0.117	1
Elmo2	0.00194146	-0.474339	0.118	0.23	1
Arnt2	0.00194397	2.66356	0.069	0.015	1
Gnpda2	0.0019536	-0.351056	0.73	0.766	1
Cenpq	0.00196285	-0.927018	0.098	0.208	1
BC017158	0.00196739	-1.84657	0.025	0.095	1
Dok4	0.00198016	-0.755876	0.123	0.245	1
Chmp2a	0.00198727	-0.217072	0.961	0.945	1
Naf1	0.00200728	-0.591501	0.069	0.164	1
Ddost	0.00200942	0.408767	0.897	0.861	1
Kcna5	0.00201033	-0.683182	0.284	0.416	1
Tnks	0.00202315	0.615829	0.618	0.485	1
Ccdc148	0.00203308	-1.18057	0.108	0.212	1
Gm39653	0.00204229	3.37503	0.034	0	1
Vmn2r31	0.00204229	5.86879	0.034	0	1
Zc3h12c	0.00204396	1.59709	0.167	0.08	1
Thrap3	0.00207162	0.318968	0.926	0.869	1
Psma7	0.00207265	0.178774	0.975	0.964	1
Polr2k	0.00207504	-0.279133	0.897	0.923	1
Cyp4x1	0.00207635	-1.83236	0.029	0.102	1
Eif2b3	0.0020806	-0.583934	0.275	0.416	1
Exoc2	0.00208443	-0.678968	0.211	0.339	1
Neu1	0.00208839	-0.467702	0.461	0.613	1
Mgmt	0.00209734	-1.28219	0.108	0.212	1
Fbl	0.00210067	0.482486	0.48	0.372	1
Rnf14	0.00211942	-0.408989	0.608	0.752	1
Rex1bd	0.00212461	-0.253574	0.887	0.916	1
Mrps33	0.00212565	0.269794	0.936	0.923	1
Rpl36a	0.00213643	0.200102	0.966	0.971	1
Tceal1	0.00213826	-0.83809	0.26	0.383	1
Clpx	0.00215164	-0.59094	0.265	0.391	1
Defb42	0.00216811	2.09551	0.069	0.015	1
Mapkapk2	0.00216971	0.453039	0.26	0.15	1
Osgepl1	0.00217257	-1.71907	0.029	0.102	1
Nccrp1	0.00219596	3.09868	0.044	0.004	1
Tmem141	0.0022086	-1.65954	0.039	0.117	1
Rpl9	0.00220974	0.150913	1	0.993	1
1700012B09Rik	0.00221118	-1.10355	0.343	0.449	1
Ppil6	0.00221145	-0.921845	0.054	0.142	1
Clstn2	0.00221571	-0.701183	0.402	0.529	1
Ryr3	0.00221585	3.01173	0.044	0.004	1
Cyp2j9	0.00222134	-2.01306	0.015	0.077	1
Ddb1	0.00222291	0.530999	0.632	0.5	1
Arsa	0.00224046	-1.44787	0.069	0.157	1
B230118H07Rik	0.00224128	-0.720448	0.225	0.358	1
Uqcr11	0.00224422	-0.188737	0.961	0.974	1
Zfp655	0.00225387	0.539511	0.627	0.569	1
Rbfox2	0.00227283	0.268934	0.706	0.653	1
Kcnh7	0.00227358	-0.519225	0.27	0.423	1
Tsga10ip	0.00227866	-1.2221	0.123	0.226	1
Gm42372	0.00228402	-0.650406	0.225	0.347	1
Nedd4l	0.00228444	-1.60159	0.044	0.124	1
Ndufs7	0.00228747	-0.243968	0.765	0.876	1
Ppa1	0.00228864	-0.357879	0.853	0.894	1
Rnf112	0.00230447	-0.795662	0.049	0.131	1
Srsf1	0.00231181	0.326356	0.882	0.901	1
Cd3eap	0.00232156	-0.876628	0.157	0.285	1
Lias	0.00232276	-0.450201	0.456	0.599	1
Lrrc57	0.00232343	-0.709052	0.211	0.343	1
Smim10l1	0.00232865	-0.375356	0.642	0.726	1
Iqcg	0.00234168	-0.829888	0.127	0.241	1
Nmral1	0.00235557	-1.16492	0.103	0.208	1
Rps25	0.00237307	0.154514	0.99	0.982	1
5730455P16Rik	0.00238286	-0.669274	0.201	0.336	1
Msmo1	0.00238526	-0.501803	0.436	0.577	1
Chac2	0.00239381	-0.514786	0.328	0.464	1
Sec11c	0.00241073	0.781601	0.583	0.544	1
Galk1	0.00241235	-0.793233	0.103	0.212	1
Cuta	0.00243369	-0.315033	0.637	0.741	1
Bst2	0.00244321	-0.85134	0.348	0.464	1
Angpt2	0.00244577	0.848079	0.147	0.066	1
Nol7	0.00246185	-0.217009	0.941	0.942	1
Kif1bp	0.00246869	-0.3475	0.583	0.704	1
Naxe	0.00247516	-0.332269	0.735	0.814	1
Psmb10	0.0024863	-1.36392	0.029	0.102	1
9130401M01Rik	0.00248832	-0.644448	0.446	0.566	1
Naa30	0.0025121	-0.704724	0.113	0.226	1
Wdtc1	0.00251983	0.489387	0.574	0.453	1
Padi2	0.00253025	-1.00843	0.289	0.394	1
Dnaja3	0.00253189	-0.584443	0.299	0.434	1
Arhgap44	0.00253237	-0.697846	0.186	0.321	1
Scrn2	0.00253426	-2.00529	0.01	0.066	1
Mrpl43	0.00253626	-0.239566	0.799	0.901	1
Slc25a1	0.00254405	-0.84283	0.157	0.274	1
Sirt4	0.00255573	-1.22124	0.069	0.161	1
Fance	0.00256873	-0.743387	0.216	0.358	1
Gpr108	0.00258539	-0.67087	0.196	0.325	1
Cst3	0.00258568	-0.239791	0.868	0.938	1
Ccdc28a	0.00259264	-0.301815	0.284	0.434	1
Lzts3	0.00261447	-0.656381	0.054	0.139	1
Nbeal1	0.0026189	-0.496752	0.314	0.449	1
Ccz1	0.00262662	-0.498623	0.515	0.639	1
Cmah	0.00263442	-1.67643	0.039	0.113	1
Dkkl1	0.00264	-0.571347	0.176	0.31	1
Phb	0.00264194	-0.584874	0.284	0.423	1
Stk19	0.00264935	0.415123	0.672	0.558	1
Slc25a40	0.00265077	-2.28245	0.049	0.128	1
Nfat5	0.00265844	1.10094	0.382	0.296	1
H2ac6	0.00267305	-0.929326	0.172	0.288	1
Snd1	0.00268749	1.00275	0.338	0.234	1
Naa35	0.00270574	0.384217	0.706	0.642	1
Abhd12	0.00270925	-0.374167	0.578	0.723	1
Gca	0.00271095	-0.625396	0.338	0.464	1
Rnmt	0.00271505	0.867249	0.328	0.215	1
Endog	0.00272435	-0.713063	0.147	0.263	1
Syt9	0.00273442	-1.75236	0.02	0.084	1
Ncor2	0.0027359	0.989404	0.392	0.281	1
Nek7	0.00273807	-0.524894	0.353	0.496	1
Rps21	0.00273944	0.174437	0.985	0.985	1
Mad2l1	0.00274443	-2.7884	0.005	0.055	1
Tiprl	0.00274893	0.305391	0.804	0.77	1
Pfdn4	0.00276341	0.307645	0.824	0.818	1
Arid5b	0.00277	-2.07226	0.034	0.106	1
Me2	0.00278046	-0.485302	0.471	0.617	1
Ncdn	0.0027917	1.52644	0.196	0.106	1
Igtp	0.00280444	-1.73133	0.049	0.128	1
Tmem9b	0.00281347	-0.807387	0.113	0.219	1
Smad7	0.00281512	-1.04794	0.083	0.179	1
Nono	0.00284062	0.381043	0.858	0.788	1
Nenf	0.0028412	-0.260608	0.809	0.916	1
Mbd4	0.00284532	-1.22262	0.039	0.117	1
Mettl8	0.00285836	-0.521583	0.127	0.245	1
Alyref	0.00287052	0.398882	0.833	0.821	1
Dusp8	0.00287209	-0.547002	0.471	0.602	1
Trpm1	0.00288284	-2.03733	0.005	0.055	1
Abcc5	0.00288809	-0.423972	0.284	0.423	1
Evi5	0.00289333	-0.523737	0.25	0.372	1
Tjap1	0.00290055	-1.82754	0.025	0.091	1
Irf2bp1	0.00291517	-0.48898	0.294	0.445	1
Zbed3	0.00291569	-0.959685	0.172	0.285	1
Traf3ip3	0.00291702	2.09416	0.181	0.095	1
Rdh14	0.00292806	-0.508424	0.51	0.624	1
Nin	0.0029364	0.685419	0.672	0.628	1
Foxg1	0.00293707	0.419224	0.917	0.847	1
Ppp2r5b	0.00294252	-0.408142	0.387	0.551	1
Slc25a23	0.00295095	-0.498271	0.279	0.427	1
Kif5a	0.00295198	-0.250354	0.755	0.847	1
Slc35a5	0.00295493	-0.855284	0.216	0.332	1
Cdc42	0.00296236	0.197941	0.946	0.956	1
Amn1	0.00296496	-0.280769	0.814	0.898	1
Ccnh	0.00296784	-0.653687	0.431	0.577	1
Slco4a1	0.00297436	-0.8493	0.093	0.193	1
Psmb5	0.00297626	-0.189497	0.951	0.974	1
Msantd4	0.00299779	-0.573695	0.255	0.391	1
Rnd2	0.00303273	0.864197	0.284	0.175	1
Tigd2	0.00303427	-0.6815	0.27	0.398	1
Socs1	0.00305003	-1.17334	0.02	0.084	1
Spint2	0.00305538	-0.246775	0.917	0.953	1
Tmem258	0.0030794	0.204727	0.941	0.942	1
Cadps2	0.00308318	1.0778	0.255	0.15	1
Cldn6	0.00308759	1.12146	0.127	0.051	1
Kbtbd3	0.00309168	-1.02241	0.064	0.153	1
Fam135a	0.00310164	-0.880133	0.201	0.318	1
Prkcd	0.00312118	-1.01299	0.216	0.328	1
Nrxn2	0.00312551	0.247326	0.863	0.818	1
Utp25	0.00312975	1.21138	0.157	0.073	1
Tmod1	0.0031428	-0.879525	0.152	0.263	1
Tsg101	0.003147	0.254918	0.877	0.88	1
Bloc1s1	0.00314995	-0.631757	0.353	0.482	1
9930021J03Rik	0.00315942	-0.389872	0.588	0.704	1
Dennd4a	0.00316019	-0.658777	0.382	0.496	1
Mien1	0.00317279	-0.215891	0.873	0.909	1
Flot1	0.00317696	0.338329	0.863	0.858	1
2510039O18Rik	0.00319099	-0.425764	0.505	0.653	1
Rpl37a	0.00320508	0.140906	1	0.985	1
Rab43	0.00320686	-2.01808	0.015	0.073	1
Oser1	0.00320921	-0.490207	0.255	0.394	1
Ebf1	0.00321552	0.135679	0.995	0.996	1
Oard1	0.00321982	-0.219233	0.392	0.555	1
Suclg1	0.00322857	-0.227713	0.696	0.821	1
Plch1	0.00323537	0.792408	0.289	0.186	1
Fam149b	0.00325406	-0.684204	0.348	0.464	1
Slc44a4	0.00326348	-1.84717	0.015	0.073	1
Anxa5	0.00327296	-0.261309	0.946	0.949	1
Irf9	0.00327786	-0.397986	0.265	0.416	1
Erich1	0.00328918	-0.519605	0.343	0.493	1
Tex29	0.00329006	1.67128	0.108	0.04	1
Serpina1a	0.00329062	1.68986	0.098	0.033	1
Cct4	0.0033051	0.20313	0.873	0.869	1
Smpd4	0.00330664	-0.174209	0.093	0.197	1
Srp19	0.0033073	-0.305023	0.799	0.876	1
Rnf182	0.00331043	0.29421	0.912	0.821	1
Trim3	0.00331179	-0.402194	0.265	0.391	1
Cuedc1	0.00331423	0.880023	0.343	0.23	1
Alg1	0.00332401	-0.796432	0.132	0.241	1
Taf9b	0.00332647	-0.883922	0.172	0.288	1
Gcsh	0.00334842	-0.56103	0.314	0.445	1
Krt10	0.00335692	-0.564025	0.436	0.558	1
Gatd3a	0.00337039	-0.775421	0.275	0.409	1
Tmem50a	0.00339035	-0.252884	0.858	0.912	1
Tax1bp1	0.00339913	-0.216972	0.887	0.938	1
Tmem106c	0.00340395	-0.403094	0.431	0.573	1
Dpm3	0.0034107	-0.243812	0.77	0.854	1
Camk2n2	0.00341674	-0.380142	0.319	0.482	1
Dnajc12	0.00342802	-0.246815	0.083	0.175	1
Rpain	0.00343269	-0.464333	0.407	0.555	1
Cd24a	0.00344037	2.41846	0.113	0.04	1
Atp5l	0.00345275	0.128455	0.985	0.982	1
Kctd4	0.00346471	-2.0984	0.088	0.179	1
Ift81	0.00346677	-0.509783	0.495	0.631	1
Prdx3	0.00346963	-0.533914	0.466	0.606	1
Hdgfl2	0.00347453	-0.473092	0.333	0.489	1
Cyhr1	0.00348907	-0.41722	0.475	0.588	1
Plpp2	0.00349155	0.682958	0.196	0.102	1
Ift88	0.00350451	0.617371	0.574	0.478	1
Trak2	0.00351618	-0.988753	0.088	0.186	1
Snrk	0.00351884	-0.430378	0.52	0.628	1
Btg1	0.0035267	-0.508282	0.5	0.642	1
Mtmr6	0.00353513	-0.65453	0.245	0.369	1
Pex7	0.00353973	-0.62164	0.417	0.511	1
Acaa1a	0.00354026	-0.410559	0.583	0.675	1
Drc1	0.00355477	-2.15904	0.029	0.095	1
Ppp2r2c	0.00356637	-1.03673	0.167	0.27	1
Rab23	0.0035771	-0.812771	0.152	0.27	1
Casp7	0.0035947	-1.45094	0.034	0.106	1
Bphl	0.00360218	-0.355648	0.51	0.631	1
Sept9	0.00361762	1.45556	0.142	0.066	1
Arl6ip6	0.00361859	0.485553	0.662	0.599	1
Ubald2	0.00363519	0.306446	0.912	0.843	1
Chmp4b	0.00364745	-0.288128	0.819	0.85	1
Ppp2cb	0.00366129	-0.790596	0.779	0.81	1
Ttc19	0.00367689	-0.640251	0.353	0.493	1
Gpr160	0.00367979	-1.49374	0.034	0.106	1
Mgat3	0.00368469	2.58004	0.049	0.007	1
Mettl23	0.00368534	-0.26105	0.804	0.887	1
Tmf1	0.00370295	-0.42266	0.574	0.701	1
Ctxn3	0.00370731	-0.857316	0.505	0.573	1
Vdac2	0.00371647	-0.185135	0.902	0.931	1
Tmbim4	0.00372601	-0.544334	0.397	0.547	1
Oaz2	0.00372922	-0.513471	0.49	0.58	1
Pcdhgc3	0.00374326	2.93571	0.049	0.007	1
Mtmr10	0.00376253	-0.787136	0.333	0.453	1
Inka2	0.00377176	1.132	0.181	0.091	1
Saxo2	0.0037764	-0.572768	0.368	0.485	1
Hdac8	0.00380756	-0.544193	0.025	0.091	1
Arhgap33	0.00381223	0.703442	0.456	0.365	1
Itga1	0.00381306	-1.97341	0.02	0.08	1
Misp	0.00381448	-1.64895	0.044	0.12	1
Rims3	0.00381471	0.289453	0.789	0.664	1
Slc31a1	0.00383063	-0.808656	0.108	0.212	1
Coq8a	0.00384374	-3.15604	0	0.04	1
Tspan7	0.00384437	-2.02539	0.025	0.088	1
Cntln	0.00386087	-0.586068	0.26	0.38	1
Tmem131l	0.00387608	-1.46715	0.098	0.19	1
Bcl10	0.00388459	-0.42858	0.525	0.664	1
Slc35b1	0.00388516	0.391843	0.765	0.774	1
Rnf113a2	0.00389219	-0.52685	0.299	0.46	1
Lacc1	0.00389339	2.27441	0.049	0.007	1
Fam117a	0.00389368	-0.875322	0.049	0.128	1
Bbof1	0.00389612	-1.10576	0.074	0.161	1
Qsox1	0.00393347	-1.25005	0.108	0.201	1
Hivep2	0.00394232	-1.9082	0.01	0.062	1
Eif4g1	0.00394934	0.472262	0.647	0.588	1
Syp	0.00395414	-0.571092	0.534	0.642	1
Xaf1	0.00395957	-0.828441	0.029	0.099	1
Rab40b	0.00397638	-0.54465	0.103	0.208	1
Phf13	0.00397832	1.00992	0.25	0.153	1
Gamt	0.00401175	-0.672318	0.24	0.358	1
Dlg2	0.00405086	-1.11303	0.093	0.186	1
Tjp3	0.00406016	-0.389294	0.549	0.65	1
Klhl36	0.00407864	-2.26777	0.034	0.102	1
Vmn2r41	0.00408077	3.08869	0.044	0.007	1
Teddm2	0.00410263	-0.989639	0.054	0.135	1
Rmnd1	0.00411254	-0.607653	0.186	0.307	1
Fam210b	0.00411713	-0.5352	0.235	0.361	1
Ucp2	0.00412789	-0.468455	0.583	0.715	1
Jmjd8	0.0041342	-0.68214	0.113	0.219	1
St8sia4	0.00414502	1.80915	0.049	0.007	1
Vsig10	0.00414515	0.705588	0.51	0.427	1
Nfatc1	0.004151	-0.750514	0.108	0.208	1
Dynll2	0.00415171	0.221125	0.98	0.956	1
Rpl36a-ps1	0.00416985	-0.935108	0.039	0.113	1
Rack1	0.00418697	0.267456	0.971	0.964	1
2700049A03Rik	0.00419894	-1.01174	0.078	0.168	1
Ptn	0.00422488	-1.25875	0.02	0.069	1
Zfp764	0.00422925	-2.25672	0.005	0.051	1
Prss53	0.00423756	-1.34208	0.025	0.088	1
Wdr55	0.00425593	-1.01867	0.098	0.193	1
Aatf	0.00426197	-0.732059	0.23	0.347	1
Higd2a	0.00426891	-0.270119	0.882	0.92	1
Plppr1	0.00428215	0.51836	0.319	0.212	1
Phb2	0.00428596	0.283056	0.848	0.803	1
Paqr4	0.00429477	1.39256	0.118	0.047	1
Gabarap	0.00430394	0.167207	0.985	0.971	1
Pdcd6	0.00431056	-0.278538	0.882	0.909	1
Aqp4	0.00431539	-0.396885	0.775	0.821	1
Fam171a1	0.00431954	0.516986	0.25	0.15	1
Suox	0.00432623	0.768684	0.348	0.241	1
H4c11	0.00433805	1.38183	0.172	0.088	1
Vmn2r65	0.00434431	6.55306	0.01	0	1
Efna1	0.0043446	2.88417	0.029	0	1
Vmn2r9	0.0043446	6.7633	0.029	0	1
Atp6v1b1	0.0043446	2.28623	0.029	0	1
Vmn2r113	0.0043446	6.35627	0.029	0	1
Vmn2r-ps130	0.0043446	5.70959	0.029	0	1
Cyp1b1	0.0043446	3.09111	0.029	0	1
Epas1	0.0043446	2.71865	0.029	0	1
Ccdc189	0.00436287	-0.447803	0.172	0.281	1
Ankrd46	0.00437067	-0.572288	0.417	0.544	1
Snrnp35	0.00438188	0.882445	0.324	0.219	1
H2aj	0.00438993	0.504427	0.652	0.588	1
Napepld	0.00441292	-2.19018	0.015	0.069	1
Ccdc22	0.00444194	-1.20935	0.103	0.193	1
Nat8f1	0.00445823	-1.15927	0.078	0.164	1
Rexo1	0.00445893	-0.473065	0.466	0.609	1
Tasp1	0.00446526	-0.540138	0.147	0.255	1
Dcaf11	0.00446774	-0.376348	0.397	0.515	1
Use1	0.00447319	-0.363	0.593	0.69	1
Kirrel3	0.00448377	-0.635333	0.279	0.401	1
Lrp11	0.00449495	-0.311087	0.51	0.635	1
Zrsr2	0.00450148	-0.66449	0.348	0.471	1
Kcnk1	0.00450774	-1.76023	0.044	0.117	1
Rab3d	0.00451348	-0.742117	0.25	0.361	1
Slc35g2	0.00451782	-1.04577	0.108	0.208	1
Ccnf	0.0045223	2.34526	0.069	0.018	1
2310009B15Rik	0.00452906	-0.375897	0.299	0.427	1
Tgfb1	0.00453014	0.77083	0.24	0.142	1
Dnajb6	0.00454352	0.2481	0.946	0.916	1
Glb1l2	0.00454742	-0.721095	0.294	0.412	1
Cst6	0.00455711	-0.507035	0.255	0.376	1
Drc3	0.00456725	-0.977124	0.074	0.161	1
Atp6v1d	0.0045764	-0.34681	0.706	0.803	1
Fbxl15	0.00458527	-0.68202	0.191	0.31	1
Slc30a1	0.00458703	0.615595	0.495	0.38	1
Cox6b2	0.00460231	3.02464	0.039	0.004	1
Bmp1	0.00460231	2.75755	0.039	0.004	1
Nrtn	0.0046045	-1.62949	0.034	0.102	1
Hdlbp	0.00461228	-0.14373	0.951	0.974	1
Vmn2r121	0.00462262	6.10563	0.025	0	1
Pip5k1a	0.00462385	0.922099	0.299	0.197	1
Mapk8ip2	0.00462733	-0.286123	0.828	0.861	1
Zfp472	0.0046411	1.7302	0.093	0.033	1
Nop2	0.00464509	-1.22522	0.054	0.131	1
Acbd6	0.0046466	-0.200025	0.711	0.81	1
Tmprss6	0.004664	-0.423987	0.721	0.818	1
Sfxn3	0.00466465	-0.685168	0.162	0.277	1
Hpse	0.00467449	-1.60961	0.029	0.095	1
A2ml1	0.00467613	-1.26251	0.108	0.234	1
Ecsit	0.00469101	-0.582085	0.265	0.394	1
Cep164	0.00472152	-0.392476	0.593	0.748	1
Gadd45g	0.00472382	2.07294	0.172	0.091	1
Susd6	0.00473692	-0.38932	0.382	0.511	1
Syt7	0.00475111	0.236259	0.912	0.807	1
Phf21b	0.00476876	2.32114	0.039	0.004	1
Cinp	0.00477738	-0.169777	0.328	0.489	1
Acer3	0.00477824	-1.52779	0.034	0.102	1
Stam	0.00479104	-0.601357	0.314	0.442	1
Efnb1	0.00481122	2.08613	0.039	0.004	1
Stox1	0.00484523	0.530866	0.529	0.423	1
Rbm43	0.004847	-0.557571	0.265	0.383	1
Gm29695	0.00485402	1.97208	0.039	0.004	1
Mcts2	0.00485421	-0.596039	0.265	0.398	1
Atxn2l	0.00488691	-0.267063	0.711	0.81	1
0610010K14Rik	0.00488781	-0.380544	0.5	0.617	1
Prag1	0.0048949	-1.06648	0.142	0.245	1
Ephx1	0.00491697	2.08168	0.103	0.04	1
Ndufa12	0.00492603	-0.184086	0.931	0.938	1
Nceh1	0.00494379	-1.17008	0.074	0.157	1
Ankrd37	0.00494461	-0.579557	0.299	0.431	1
Nrxn3	0.00496094	2.1298	0.069	0.018	1
Stk32a	0.004977	0.232712	0.926	0.88	1
Ormdl3	0.00500164	-0.835063	0.137	0.241	1
B2m	0.00500377	0.335956	0.485	0.398	1
Cchcr1	0.00500801	-1.24144	0.025	0.088	1
Nqo2	0.0050125	-0.846963	0.069	0.15	1
Cox20	0.0050274	-0.414486	0.578	0.686	1
Smarce1	0.00503435	0.217949	0.882	0.803	1
Rassf2	0.00505427	-0.991222	0.108	0.204	1
Nosip	0.00508268	-0.468748	0.304	0.438	1
Eid2	0.00511071	-0.260507	0.804	0.887	1
Ccar2	0.00514502	-0.705168	0.167	0.277	1
Gnl3l	0.00517119	-0.262914	0.471	0.602	1
Slc45a1	0.00518141	-0.703646	0.181	0.292	1
Dffa	0.00518724	-1.43813	0.039	0.109	1
Hcn1	0.00519436	-0.992236	0.123	0.215	1
Cep162	0.00526551	-0.932526	0.162	0.263	1
Ebf2	0.00529809	-0.291857	0.917	0.956	1
Nek6	0.00530775	-1.94059	0.02	0.077	1
Tmem65	0.00532924	0.572608	0.593	0.522	1
Cep120	0.00534445	0.611739	0.534	0.453	1
Fut8	0.00534727	-0.701362	0.245	0.361	1
Iqck	0.00534735	-0.438563	0.275	0.405	1
Prkdc	0.00534981	-1.11344	0.039	0.109	1
Pnrc1	0.00537094	-0.21537	0.873	0.927	1
Fam241b	0.00537979	-0.37517	0.618	0.734	1
Srebf1	0.0054054	-0.821006	0.196	0.318	1
Mrpl40	0.0054204	-0.522504	0.333	0.456	1
Trim29	0.00542774	-0.752134	0.069	0.153	1
Fkbp1a	0.0054297	-0.190699	0.966	0.967	1
Cdk8	0.00543278	0.444334	0.564	0.493	1
Rabepk	0.0054461	-0.838807	0.098	0.193	1
Prrc2c	0.00544847	-0.322597	0.853	0.894	1
Nrarp	0.00546434	1.52254	0.093	0.033	1
Cltb	0.00546743	-0.621676	0.27	0.387	1
Fgf12	0.00547423	-0.323807	0.76	0.81	1
Azin2	0.00550993	-0.649929	0.152	0.263	1
Neurog1	0.00551006	2.5355	0.054	0.011	1
Atp6v1f	0.00552177	-0.179576	0.941	0.942	1
Hnrnpf	0.00552685	-0.230899	0.882	0.916	1
Hacd2	0.00553838	-0.592681	0.52	0.635	1
Ctps2	0.00554553	0.726415	0.338	0.23	1
Rfxank	0.00556924	-2.06115	0.02	0.077	1
Ndufc1	0.00558731	-0.180069	0.922	0.938	1
1700016D06Rik	0.00559003	-1.13236	0.039	0.109	1
Ahcyl1	0.00566375	0.423798	0.593	0.511	1
Eif3h	0.00566945	-0.20929	0.966	0.967	1
Dbndd2	0.00568072	-0.706753	0.225	0.347	1
Gstm1	0.00569782	2.08604	0.093	0.033	1
[truncated: 8,777 more rows]

## Sheet: filtered
Figure 3-Source Data 1. Differentially expressed genes between immature Gnao1 and immature Gnai2 neurons
Gnao1 enriched		Gnai2 enriched	|log2FC| >1 and adjusted p-value < 10E-6
Gene	p value	Avergae log2 Fold Change(Gnao1 vs Gnai2)	Fraction of cells expressing the gene in immature Gnao1 cluster	Fraction of cells expressing the gene in immature Gnai2 cluster	Adjusted p-value
Meis2	2.5621e-73	-4.43605	0.137	0.982	5.59946e-69
Gnai2	6.32715e-70	-3.6266	0.652	0.982	1.3828e-65
Cnpy1	7.02093e-62	3.13788	0.931	0.237	1.53443e-57
Cystm1	3.71841e-58	-1.57481	0.951	0.978	8.12658e-54
Gnao1	3.51154e-56	2.05096	0.971	0.708	7.67447e-52
Gng2	7.86341e-55	-2.24456	0.574	0.96	1.71855e-50
Tfap2e	3.36423e-54	4.72086	0.74	0.058	7.35252e-50
Shisa8	1.07292e-51	4.52804	0.73	0.069	2.34488e-47
Prdx2	3.19475e-48	1.23859	0.995	0.967	6.98213e-44
Krt8	3.12774e-47	2.15711	0.961	0.781	6.83568e-43
Pcdh7	2.97396e-44	-4.37559	0.069	0.723	6.49958e-40
Rtp1	1.63e-42	-4.38981	0.103	0.719	3.56237e-38
Ncam2	1.55672e-41	-4.44076	0.064	0.69	3.4022e-37
Krt18	1.69509e-40	2.07136	0.961	0.777	3.70462e-36
Esd	1.67923e-38	-2.40911	0.157	0.763	3.66996e-34
Nhlh2	1.26875e-37	1.27888	0.975	0.891	2.77286e-33
Car2	2.20013e-37	-3.45659	0.25	0.781	4.80839e-33
Fam241a	3.45647e-37	-2.77671	0.324	0.81	7.55412e-33
Dync1i1	8.34782e-36	1.83012	0.907	0.657	1.82442e-31
Tspan1	8.11431e-35	-3.20228	0.181	0.712	1.77338e-30
Fth1	2.08238e-33	-1.26836	1	0.989	4.55103e-29
Ttll7	5.15269e-32	-1.48393	0.725	0.927	1.12612e-27
Robo2	1.93616e-30	2.23567	0.745	0.281	4.23147e-26
Gm36028	2.42555e-30	2.82678	0.789	0.376	5.30104e-26
Osbpl9	2.98101e-30	1.51872	0.917	0.712	6.51499e-26
Akr1b3	5.94303e-30	2.48203	0.73	0.299	1.29885e-25
Homer2	6.83933e-30	1.50107	0.922	0.62	1.49473e-25
Spats2	8.34088e-30	1.19753	0.946	0.799	1.8229e-25
Prrxl1	2.22625e-29	4.81516	0.5	0.066	4.86546e-25
Fam3c	4.206e-27	2.05121	0.794	0.515	9.19221e-23
Plaat3	1.11935e-26	-1.66839	0.564	0.894	2.44635e-22
Tppp3	2.84382e-26	2.68852	0.539	0.109	6.21516e-22
Rtp2	3.21404e-26	-2.05237	0.26	0.723	7.02427e-22
Sgpl1	4.10153e-26	-1.85561	0.392	0.774	8.9639e-22
Lmo4	5.04755e-26	1.93368	0.995	0.931	1.10314e-21
Chga	7.20144e-26	-1.21499	0.946	0.985	1.57387e-21
Manf	9.38546e-26	1.4516	0.956	0.974	2.05119e-21
Dut	4.46037e-25	1.15223	0.926	0.876	9.74814e-21
Snca	5.72859e-25	-1.11827	0.735	0.931	1.25198e-20
Nsg1	6.8796e-25	-1.37254	0.961	0.978	1.50354e-20
Trp53i11	9.54392e-25	1.18817	0.941	0.796	2.08582e-20
Apmap	4.59717e-24	1.49045	0.917	0.785	1.00471e-19
Plekhb1	8.17089e-24	-3.38273	0.142	0.566	1.78575e-19
Vmn2r1	1.81231e-23	3.08743	0.451	0.069	3.96081e-19
Gng3	2.80872e-22	-1.55334	0.549	0.818	6.13845e-18
Clmn	4.1262e-22	1.50117	0.858	0.584	9.0178e-18
Prdx1	1.46532e-21	-1.64142	0.412	0.781	3.20246e-17
Agpat5	2.00477e-20	1.77253	0.745	0.474	4.38142e-16
Kctd1	2.16942e-20	1.85033	0.794	0.5	4.74128e-16
Batf3	3.10018e-20	5.02632	0.309	0.015	6.77545e-16
Rprml	3.63243e-20	6.28565	0.299	0.011	7.93867e-16
Ero1lb	4.04914e-20	1.57926	0.794	0.511	8.8494e-16
Gramd1c	4.43767e-20	-3.91308	0.049	0.42	9.69852e-16
Sdf2l1	7.57752e-20	2.04851	0.853	0.715	1.65607e-15
Sphkap	1.06956e-19	3.66221	0.382	0.058	2.33752e-15
Srsf4	1.17443e-19	1.65821	0.779	0.496	2.56672e-15
S100a10	1.35654e-19	-1.4121	0.529	0.85	2.96472e-15
Gng13	8.45372e-19	-4.68382	0.206	0.551	1.84756e-14
Dusp15	9.82021e-19	2.06413	0.544	0.19	2.14621e-14
Sp8	1.05678e-18	3.97222	0.333	0.036	2.3096e-14
Gdpd1	1.42459e-18	-1.23688	0.647	0.847	3.11344e-14
Chd5	1.43267e-18	4.49478	0.304	0.022	3.1311e-14
Prxl2a	1.53509e-18	-1.35018	0.696	0.898	3.35494e-14
Mid1ip1	1.68583e-18	-1.28027	0.52	0.81	3.68438e-14
Pdia6	1.68663e-18	1.2048	0.926	0.876	3.68614e-14
Lpcat2	1.83561e-18	-1.58339	0.275	0.672	4.01173e-14
Clgn	1.86088e-18	-1.19563	0.73	0.883	4.06695e-14
Chgb	4.11749e-18	-2.29657	0.162	0.536	8.99878e-14
Optn	5.27244e-18	2.87998	0.426	0.102	1.15229e-13
Anp32a	1.4316e-17	1.13795	0.956	0.839	3.12876e-13
Tafa1	2.20596e-17	1.60666	0.48	0.124	4.82113e-13
Foxo1	4.13234e-17	2.66948	0.588	0.281	9.03123e-13
Tstd1	5.12143e-17	-1.18109	0.574	0.832	1.11929e-12
Rnaseh2a	5.7437e-17	1.42708	0.725	0.449	1.25529e-12
Camk1	6.0721e-17	-1.35266	0.412	0.745	1.32706e-12
Lingo2	6.8897e-17	-2.25736	0.137	0.507	1.50574e-12
Gcnt2	1.30739e-16	-2.50167	0.162	0.5	2.8573e-12
Csrp2	4.09363e-16	2.88141	0.397	0.091	8.94663e-12
Sept11	9.05466e-16	1.41775	0.711	0.423	1.9789e-11
Macrod1	1.16973e-15	-1.34843	0.505	0.766	2.55644e-11
Asah1	1.19179e-15	-1.52281	0.407	0.708	2.60466e-11
Nfe2l2	2.18293e-15	-1.76513	0.245	0.58	4.77079e-11
Nqo1	2.2828e-15	-3.40942	0.064	0.376	4.98906e-11
Spsb3	3.72578e-15	-1.13638	0.48	0.774	8.14269e-11
Mt3	3.95409e-15	2.27675	0.485	0.186	8.64166e-11
Sytl1	5.45162e-15	-1.43558	0.407	0.708	1.19145e-10
BC052040	6.37528e-15	-2.9391	0.054	0.35	1.39332e-10
Smim22	8.28876e-15	-1.39763	0.338	0.672	1.81151e-10
Omp	9.48727e-15	-2.0349	0.382	0.664	2.07344e-10
Creb5	1.24943e-14	2.58602	0.485	0.197	2.73063e-10
Dnm1	1.51448e-14	-2.02738	0.201	0.518	3.30989e-10
Wdr66	1.54962e-14	1.49633	0.613	0.299	3.38669e-10
Tenm2	1.65338e-14	-1.55351	0.186	0.551	3.61346e-10
Mkrn2os	1.69524e-14	-1.5737	0.216	0.558	3.70494e-10
Srcin1	2.1998e-14	-1.27287	0.471	0.734	4.80766e-10
Fbxo17	5.43019e-14	2.26346	0.426	0.146	1.18677e-09
Clptm1	6.90822e-14	-1.46065	0.574	0.763	1.50979e-09
Cited2	9.03841e-14	1.68283	0.672	0.412	1.97535e-09
Tom1	9.748e-14	-1.83104	0.196	0.507	2.13043e-09
S100a13	1.30411e-13	-2.60957	0.162	0.456	2.85014e-09
Tmem74bos	2.02802e-13	-1.47025	0.426	0.69	4.43223e-09
Resp18	2.14312e-13	-3.2824	0.078	0.369	4.68378e-09
Creld2	3.13625e-13	1.71633	0.647	0.423	6.85427e-09
Magi2	3.20823e-13	-1.41751	0.338	0.639	7.01159e-09
Calr4	3.45936e-13	1.16322	0.882	0.799	7.56042e-09
Chmp2b	4.14515e-13	-1.49556	0.289	0.595	9.05923e-09
Dock8	4.27379e-13	-2.15646	0.113	0.412	9.34037e-09
Ezh2	4.61891e-13	1.59579	0.603	0.318	1.00946e-08
Scgn	6.299e-13	-2.9815	0.049	0.318	1.37665e-08
Pea15a	7.26033e-13	1.88574	0.554	0.277	1.58674e-08
Nfix	1.0185e-12	-1.35948	0.309	0.635	2.22592e-08
Dlgap3	1.2579e-12	-2.08528	0.127	0.416	2.74914e-08
Smim11	1.31089e-12	-1.5199	0.225	0.536	2.86496e-08
Celf4	1.86438e-12	-1.44263	0.284	0.591	4.0746e-08
Lrrc42	1.87459e-12	-1.72836	0.225	0.526	4.09692e-08
Jakmip1	1.97215e-12	-2.09362	0.039	0.296	4.31014e-08
Pdlim4	2.13635e-12	3.6143	0.27	0.047	4.66899e-08
Pkib	2.13966e-12	-1.04338	0.417	0.715	4.67623e-08
Srsf6	2.31905e-12	-1.29967	0.338	0.631	5.06829e-08
Rbm11	2.32231e-12	-1.52084	0.186	0.504	5.07541e-08
Kctd16	2.36083e-12	-1.20622	0.221	0.529	5.15959e-08
B4galt6	2.3726e-12	2.24415	0.304	0.062	5.18531e-08
Dsp	2.74363e-12	1.10337	0.711	0.46	5.9962e-08
Them6	3.39727e-12	-1.13991	0.49	0.77	7.42474e-08
Pcsk1n	3.57604e-12	-1.68961	0.23	0.522	7.81543e-08
Hspa5	3.89723e-12	1.11007	0.961	0.974	8.51739e-08
Terf2	3.97579e-12	1.91978	0.48	0.219	8.68908e-08
Tmem151a	5.07768e-12	-1.61872	0.225	0.526	1.10973e-07
Eml2	5.2055e-12	-3.46091	0.02	0.248	1.13766e-07
Pdia5	6.90635e-12	1.58198	0.471	0.204	1.50938e-07
Cacng4	7.65244e-12	1.42588	0.642	0.369	1.67244e-07
Hopx	8.66623e-12	-1.48026	0.201	0.515	1.89401e-07
Sv2a	8.76928e-12	-1.83732	0.162	0.453	1.91653e-07
Csdc2	8.91316e-12	1.92805	0.451	0.201	1.94797e-07
Aig1	9.35142e-12	-1.37274	0.304	0.602	2.04375e-07
Pde1a	1.29741e-11	-2.04994	0.123	0.405	2.83549e-07
Pdgfa	1.73327e-11	1.24851	0.583	0.285	3.78807e-07
Pbx3	1.77029e-11	-1.07895	0.485	0.752	3.86897e-07
Cdca3	1.78499e-11	-2.86442	0.034	0.266	3.90109e-07
Grin3a	2.31318e-11	2.7909	0.245	0.04	5.05545e-07
Idi1	2.3693e-11	-1.03887	0.554	0.755	5.1781e-07
Taf15	2.37312e-11	1.02294	0.755	0.566	5.18646e-07
H2bc21	2.86857e-11	-1.17368	0.667	0.788	6.26926e-07
Mex3a	3.32275e-11	1.42843	0.544	0.259	7.26188e-07
Ttll6	4.06775e-11	-1.90023	0.142	0.42	8.89006e-07
Pcolce2	4.86292e-11	-4.50395	0.015	0.219	1.06279e-06
Ptprt	5.7297e-11	2.279	0.328	0.099	1.25223e-06
Hspa2	7.0028e-11	-1.4777	0.24	0.522	1.53046e-06
Sobp	7.1079e-11	-2.51346	0.044	0.277	1.55343e-06
Pcsk2	7.8501e-11	-1.63788	0.103	0.369	1.71564e-06
Cacna2d1	8.1796e-11	-1.48735	0.275	0.544	1.78765e-06
Nsg2	1.05133e-10	1.13237	0.549	0.266	2.29768e-06
Ovol2	1.23286e-10	1.06321	0.667	0.449	2.69441e-06
Inpp4a	1.3816e-10	-1.33649	0.471	0.704	3.01948e-06
Stt3b	1.39719e-10	1.30717	0.588	0.328	3.05356e-06
Racgap1	1.49316e-10	1.00533	0.73	0.533	3.26331e-06
Lrpap1	1.51585e-10	-1.52418	0.23	0.5	3.31288e-06
Pcf11	1.60883e-10	-1.16788	0.377	0.646	3.5161e-06
Plxnd1	1.78837e-10	3.94409	0.176	0.015	3.90848e-06
Cacna1h	1.94682e-10	-1.28527	0.25	0.529	4.25478e-06
Psen2	1.97571e-10	-1.14063	0.564	0.799	4.31792e-06
Ppl	2.03727e-10	-1.20369	0.426	0.679	4.45246e-06
Nppc	2.19895e-10	3.9042	0.206	0.029	4.8058e-06
Meis1	2.33002e-10	-1.79595	0.181	0.449	5.09226e-06
Prxl2b	2.41683e-10	-1.6112	0.652	0.748	5.28198e-06
Fscn1	2.78554e-10	1.4405	0.529	0.288	6.0878e-06
Perp	3.03719e-10	-1.65613	0.157	0.427	6.63778e-06
Tnnt1	3.7517e-10	-3.74758	0.02	0.212	8.19933e-06
