# Supplementary material for: Single-cell transcriptomics of vomeronasal neuroepithelium reveals a differential endoplasmic reticulum environment amongst neuronal subtypes
Source: eLife. 2024 Dec 13;13:RP98250. doi: 10.7554/eLife.98250 (PMC11643622; doi:10.7554/eLife.98250)
Supplement: Figure 5—source data 1. — Genes that satisfy the criteria |log2 foldchange|>1 and adjusted p-value <10–6 are saved in a separate sheet. [file elife-98250-fig5-data1.xlsx]

## Sheet: Gnao1_vs_Gnai2
Figure 5-Source Data 1. Differentially expressed genes between mature Gnao1 and mature Gnai2 neurons
Gene	p value	Avergae log2 Fold Change(Gnao1 vs Gnai2)	Percentage of cells expressing the gene in Gnao1 cluster	Percentage of cells expressing the gene in Gnai2 cluster	Adjusted p-value
Meis2	0	-4.7635	0.127	0.986	0
Rtp1	0	-4.09634	0.122	0.966	0
Cnpy1	0	6.821	0.871	0.065	0
Gnai2	0	-4.70032	0.188	0.992	0
Gng2	0	-4.30127	0.181	0.982	0
Pcdh7	0	-3.68632	0.073	0.871	0
Gnao1	0	6.90314	0.855	0.07	0
Krt8	0	5.94567	0.836	0.118	0
Nrp2	0	-2.56378	0.245	0.922	0
Tfap2e	0	7.31185	0.674	0.01	0
Fam241a	0	-3.3963	0.338	0.972	0
Robo2	0	5.60876	0.63	0.014	0
Zdhhc3	0	-2.52168	0.324	0.89	0
Gchfr	0	4.70818	0.633	0.07	0
Gng13	0	-3.92186	0.425	0.985	0
Tafa1	0	4.53026	0.631	0.081	0
Mt3	0	3.81233	0.743	0.194	0
Gdpd1	0	-2.1127	0.442	0.947	0
Sphkap	0	7.20901	0.497	0.007	0
Vmn2r1	0	7.36213	0.496	0.016	0
Nsg1	0	-3.83223	0.617	0.988	0
Car2	0	-2.22593	0.609	0.97	0
Agpat5	0	3.80908	0.863	0.507	0
Plekhb1	0	-1.85612	0.626	0.973	0
Socs2	0	-1.93822	0.717	0.978	0
Cystm1	0	-2.25137	0.752	0.984	0
Gm36028	0	4.30425	0.972	0.804	0
Ckb	0	-1.67443	0.828	0.988	0
Rps4x	0	-1.11195	0.898	0.993	0
Manf	0	2.22243	0.936	0.969	0
Hspa5	0	2.14198	0.954	0.978	0
Calr4	0	1.96608	0.966	0.98	0
Apmap	0	2.53528	0.912	0.9	0
Stbd1	0	1.78836	0.979	0.987	0
Itm2b	0	2.22329	0.99	0.992	0
Dner	2.74956e-307	-2.30142	0.242	0.878	6.00917e-303
Dnajc3	4.49715e-304	2.88312	0.891	0.817	9.82852e-300
Tppp3	2.2976e-301	6.09521	0.515	0.041	5.0214e-297
Pdia3	3.88796e-301	1.41716	0.972	0.988	8.49714e-297
S100a13	5.58388e-298	-1.88561	0.618	0.957	1.22036e-293
Vmn2r2	1.98432e-297	8.0916	0.464	0.022	4.33672e-293
Ppia	7.31941e-296	-0.871019	0.895	0.995	1.59966e-291
Wscd2	2.3628e-291	8.06885	0.398	0.003	5.1639e-287
Tspan1	7.12313e-286	-3.22673	0.139	0.793	1.55676e-281
Prxl2a	2.28224e-281	-1.09318	0.854	0.985	4.98783e-277
Fbxo17	3.44131e-279	3.65434	0.695	0.184	7.52097e-275
Krt18	2.70228e-273	3.18768	0.847	0.621	5.90583e-269
Esd	4.4393e-272	-2.24222	0.351	0.875	9.7021e-268
Hsp90b1	5.27459e-270	1.49614	0.954	0.985	1.15276e-265
Shisa8	1.00878e-268	6.7702	0.385	0.006	2.20468e-264
Mgst3	8.72198e-266	-1.09822	0.807	0.98	1.90619e-261
Selenos	1.08431e-254	1.47719	0.915	0.972	2.36977e-250
B2m	1.29427e-253	2.71712	0.857	0.736	2.82863e-249
Pdia6	4.7034e-252	2.29253	0.908	0.917	1.02793e-247
Dpysl3	1.31831e-251	2.84275	0.804	0.451	2.88117e-247
H2bc21	4.81422e-251	-1.66379	0.65	0.943	1.05215e-246
Gcnt2	6.79791e-250	-2.41241	0.279	0.815	1.48568e-245
Sdf2l1	4.91037e-246	2.51614	0.872	0.87	1.07316e-241
Dio3	2.12174e-245	5.41464	0.387	0.015	4.63707e-241
Eif1	1.35467e-241	-0.711731	0.875	0.991	2.96063e-237
Hmgn3	6.30245e-237	-1.1118	0.776	0.976	1.3774e-232
Vmn2r7	4.10718e-235	4.86812	0.568	0.116	8.97623e-231
Fam3c	4.45604e-233	2.34211	0.849	0.781	9.73867e-229
Qpct	9.76866e-233	-1.94142	0.338	0.845	2.13494e-228
Exosc7	3.32546e-228	-1.96787	0.389	0.836	7.26779e-224
Batf3	4.1112e-226	6.95501	0.323	0.004	8.98503e-222
Rhou	3.19865e-225	3.64033	0.464	0.051	6.99064e-221
Nfix	2.06416e-221	-3.73919	0.066	0.665	4.51122e-217
Selenof	1.38967e-220	0.924132	0.913	0.985	3.03713e-216
Chgb	7.3603e-218	-1.14675	0.574	0.943	1.60859e-213
Prdx2	9.78771e-217	1.72715	0.864	0.956	2.1391e-212
Fkbp2	3.30071e-216	1.44323	0.879	0.955	7.2137e-212
Osbpl9	1.69701e-211	2.18207	0.82	0.815	3.70881e-207
Prdx1	1.02353e-207	-1.33765	0.51	0.923	2.23693e-203
Cpsf6	2.40081e-207	-1.52533	0.579	0.908	5.24697e-203
Ap1ar	6.41847e-198	-1.52764	0.545	0.878	1.40276e-193
Lgals9	1.12896e-197	3.40127	0.453	0.063	2.46734e-193
Nfe2l2	4.59999e-197	-1.46205	0.554	0.893	1.00533e-192
Selenom	5.3908e-197	0.585732	0.994	0.994	1.17816e-192
Galnt18	9.72508e-197	2.68614	0.749	0.385	2.12542e-192
Gapdh	2.85611e-196	-0.723194	0.869	0.99	6.24204e-192
Vmn2r6	4.49243e-196	5.53085	0.446	0.071	9.81821e-192
Srp14	5.78053e-195	1.06866	0.856	0.976	1.26333e-190
Spcs2	7.7665e-194	1.43184	0.867	0.948	1.69737e-189
Ppib	4.78349e-193	0.935832	0.929	0.986	1.04543e-188
Gramd1c	6.45086e-193	-2.47112	0.222	0.724	1.40984e-188
Ppp1r1a	8.30376e-192	-1.10113	0.705	0.954	1.81479e-187
Fhit	7.57869e-190	3.18904	0.551	0.132	1.65632e-185
Srsf4	1.41663e-189	2.42088	0.746	0.428	3.09605e-185
Eml2	1.10594e-186	-5.01705	0.043	0.579	2.41703e-182
Tom1	1.15012e-182	-1.83798	0.304	0.789	2.5136e-178
Cartpt	1.89779e-181	-0.709455	0.91	0.989	4.14761e-177
Abca1	3.82191e-180	4.24999	0.334	0.024	8.35279e-176
Matn2	1.19948e-177	-3.54708	0.064	0.584	2.62147e-173
Cfap300	6.4679e-176	2.27094	0.773	0.595	1.41356e-171
Ugp2	4.96393e-175	2.33551	0.784	0.697	1.08487e-170
Gabrr2	1.14985e-174	7.63869	0.245	0.001	2.51299e-170
Basp1	9.49025e-174	-0.891817	0.751	0.971	2.07409e-169
Optn	2.79631e-173	3.40881	0.394	0.049	6.11135e-169
Scgn	1.22138e-172	-1.3145	0.596	0.896	2.66933e-168
Vmn2r4	2.14906e-171	8.28219	0.281	0.012	4.69678e-167
Idi1	7.31013e-171	-1.65214	0.445	0.82	1.59763e-166
Creld2	3.39969e-170	2.87808	0.742	0.418	7.43002e-166
Fxyd6	2.05559e-168	-1.04981	0.694	0.95	4.49249e-164
Ldhb	1.16332e-167	-0.710782	0.903	0.994	2.54244e-163
Kcnk3	1.16458e-167	-1.64456	0.336	0.776	2.54518e-163
Nsmce3	2.80719e-167	-2.26366	0.247	0.701	6.1351e-163
Calm2	4.48847e-167	-0.581635	0.928	0.995	9.80954e-163
Sult4a1	6.30854e-166	-1.03376	0.671	0.932	1.37873e-161
Ly6h	1.09433e-165	-1.29875	0.5	0.88	2.39165e-161
Ttll7	4.104e-165	-0.753832	0.788	0.981	8.9693e-161
Mkrn2os	5.91327e-165	-2.80201	0.171	0.654	1.29235e-160
Calr	8.46331e-164	-1.64687	0.16	0.653	1.84966e-159
Prph	1.02136e-163	-4.66015	0.08	0.571	2.23218e-159
Fdps	7.36642e-163	-1.14892	0.724	0.953	1.60993e-158
Ywhah	1.55535e-162	-0.700492	0.808	0.983	3.39922e-158
Atp5g1	3.06124e-162	-1.8278	0.373	0.766	6.69033e-158
Ncam2	6.40193e-161	-2.1266	0.16	0.642	1.39914e-156
H2-M10.3	1.18185e-160	5.19808	0.349	0.044	2.58293e-156
Rasl11a	7.7988e-160	-2.32531	0.359	0.758	1.70443e-155
Mfap3l	6.35761e-159	3.08774	0.466	0.098	1.38946e-154
Cdk14	3.883e-158	-1.61049	0.4	0.788	8.4863e-154
Jund	8.68415e-158	-0.736298	0.843	0.987	1.89792e-153
Acbd7	2.35382e-157	1.09023	0.837	0.958	5.14427e-153
Rtp2	4.66002e-155	-1.04813	0.573	0.875	1.01845e-150
Trim35	5.17585e-152	-1.03742	0.644	0.92	1.13118e-147
Sgpl1	1.37342e-150	-0.987894	0.489	0.842	3.0016e-146
Aig1	1.22191e-149	-0.964309	0.564	0.891	2.67048e-145
Calb2	9.17041e-149	0.484769	0.978	0.996	2.00419e-144
Aldoa	1.02366e-148	-0.88327	0.792	0.978	2.23722e-144
Nav1	2.18003e-148	-1.2825	0.549	0.858	4.76446e-144
Dnajb11	2.23511e-148	1.25929	0.882	0.956	4.88484e-144
Pcyt2	3.90222e-146	-1.43747	0.452	0.79	8.5283e-142
Stmn4	4.94636e-146	-1.31645	0.723	0.962	1.08103e-141
Retreg1	2.08944e-144	-0.920612	0.679	0.951	4.56648e-140
Gramd1b	2.12213e-144	2.57751	0.423	0.081	4.63792e-140
Clgn	6.9928e-144	-0.491726	0.815	0.978	1.52828e-139
Cirbp	3.88083e-141	-0.682536	0.804	0.981	8.48154e-137
Fetub	9.35627e-141	1.32146	0.98	0.989	2.04481e-136
Cd47	4.85241e-140	-0.538389	0.887	0.989	1.06049e-135
Mfhas1	5.65444e-140	2.55586	0.53	0.156	1.23578e-135
Sp8	2.80177e-139	3.71968	0.256	0.016	6.12326e-135
Aldoc	7.74006e-139	-1.41687	0.414	0.779	1.69159e-134
Tmsb10	9.43216e-138	-0.87604	0.779	0.984	2.0614e-133
Epha5	2.2378e-137	-0.822577	0.766	0.971	4.89072e-133
Cdkn1b	2.33308e-137	-1.58647	0.441	0.777	5.09895e-133
Traf3ip3	2.92662e-137	5.31072	0.26	0.02	6.39612e-133
Sh3bgrl3	4.15177e-136	-0.744517	0.76	0.969	9.07369e-132
Lrrn1	2.29801e-135	-0.965411	0.332	0.757	5.0223e-131
Rfk	3.60308e-135	-0.806737	0.756	0.963	7.87454e-131
Dbi	4.84764e-135	1.44177	0.854	0.965	1.05945e-130
H2-M10.5	3.67011e-134	9.09419	0.304	0.028	8.02103e-130
Cldn9	9.19823e-134	-1.22523	0.427	0.788	2.01027e-129
Irf2bpl	1.17256e-133	-0.949301	0.686	0.931	2.56264e-129
Kctd1	3.11413e-132	2.03958	0.716	0.447	6.80592e-128
B4galt6	3.303e-132	4.01093	0.204	0.004	7.21871e-128
Slc9a3r1	1.00927e-131	-1.10718	0.556	0.868	2.20575e-127
Lingo2	3.70872e-131	-3.08581	0.043	0.469	8.1054e-127
Tubb4b	4.78531e-131	-0.658539	0.849	0.988	1.04583e-126
Jak1	6.01654e-131	0.766533	0.853	0.98	1.31491e-126
Gng3	8.32301e-131	-0.77275	0.761	0.975	1.81899e-126
Eya2	2.6932e-129	-1.78806	0.31	0.689	5.88599e-125
Eno1	7.93969e-129	-0.842497	0.723	0.945	1.73522e-124
Plac8	1.82509e-128	1.75478	0.749	0.721	3.98874e-124
H2-M10.6	7.08658e-128	7.0033	0.235	0.015	1.54877e-123
Klf7	1.40608e-127	-0.764053	0.732	0.956	3.07298e-123
Ctsz	1.8665e-127	-1.17899	0.457	0.8	4.07924e-123
Pof1b	2.31482e-127	-3.08974	0.062	0.484	5.05905e-123
H2ac6	1.52685e-126	2.40172	0.626	0.287	3.33694e-122
Jakmip1	3.74147e-126	-3.68845	0.037	0.455	8.17699e-122
Srsf6	4.57928e-126	-1.38708	0.307	0.679	1.0008e-121
Slc22a4	1.90198e-125	5.36285	0.198	0.005	4.15678e-121
Tmem132c	2.76833e-125	-1.82903	0.265	0.656	6.05018e-121
Celf4	1.54213e-123	-2.32027	0.173	0.581	3.37032e-119
Ssr4	2.69705e-123	1.07874	0.853	0.962	5.89439e-119
Tuba1a	3.44164e-123	-0.556914	0.881	0.992	7.5217e-119
Pcp4l1	4.63036e-123	-1.59819	0.472	0.827	1.01197e-118
Sec11c	8.31692e-123	1.45278	0.803	0.87	1.81766e-118
Cspg5	1.91246e-122	3.09604	0.509	0.165	4.17968e-118
Camk1	1.6201e-121	-0.898257	0.664	0.915	3.54072e-117
Lhx2	1.91998e-121	-0.798858	0.747	0.964	4.19611e-117
Got1	2.03704e-121	-1.20679	0.491	0.787	4.45196e-117
Pde4a	1.23607e-120	-0.993909	0.541	0.829	2.70143e-116
Dusp15	1.4986e-120	2.16513	0.626	0.281	3.27518e-116
Mmgt2	2.06819e-120	-1.11151	0.526	0.818	4.52003e-116
Prrc2b	2.64411e-119	-0.690768	0.784	0.975	5.77869e-115
Atp6v1g1	6.94151e-119	-0.607952	0.779	0.973	1.51707e-114
Chst1	2.60348e-118	1.83419	0.654	0.275	5.6899e-114
Ebf1	3.99249e-118	-0.36912	0.89	0.99	8.72558e-114
Rab6a	2.26967e-117	-0.72651	0.731	0.955	4.96036e-113
Doc2b	5.57041e-117	4.16269	0.255	0.027	1.21741e-112
Klhdc8a	6.15723e-117	2.95482	0.298	0.043	1.34566e-112
Serpinb6a	2.09551e-116	-0.813034	0.702	0.935	4.57974e-112
Mid1ip1	5.155e-116	-1.08438	0.57	0.838	1.12663e-111
Tmsb4x	5.73709e-116	0.536529	0.976	0.997	1.25384e-111
Clptm1	9.03686e-116	-0.389514	0.815	0.973	1.97501e-111
Bcam	2.2927e-115	-2.866	0.06	0.451	5.0107e-111
Ddx5	3.73985e-115	-0.565705	0.83	0.985	8.17344e-111
Asah1	6.69249e-115	-0.68424	0.646	0.892	1.46264e-110
mt-Cytb	8.03985e-115	0.955554	0.98	0.99	1.75711e-110
H3f3b	1.97442e-114	-0.543627	0.895	0.993	4.31509e-110
H4c8	3.52941e-114	2.95109	0.448	0.133	7.71352e-110
Spcs3	3.78157e-114	1.64556	0.811	0.782	8.26461e-110
Stmn1	2.5133e-113	-0.748177	0.787	0.981	5.49282e-109
Dnaja1	5.11293e-113	-0.579434	0.819	0.981	1.11743e-108
Tsc22d1	1.34718e-112	-0.745375	0.774	0.969	2.94426e-108
Tmed3	6.26907e-112	1.11618	0.85	0.947	1.37011e-107
Rpl9	3.53871e-111	-0.475207	0.863	0.988	7.73384e-107
Lmo1	4.67962e-111	-0.910534	0.68	0.926	1.02273e-106
Srcin1	8.20231e-111	-0.688848	0.72	0.938	1.79262e-106
4921524J17Rik	1.5719e-110	-0.917376	0.637	0.882	3.43539e-106
Vsnl1	1.58596e-110	-0.840162	0.726	0.948	3.46612e-106
Zdhhc12	2.0844e-110	-1.84047	0.168	0.544	4.55546e-106
Kcnk12	5.16882e-110	6.20048	0.159	0.001	1.12964e-105
Perp	5.2133e-110	-1.38016	0.343	0.708	1.13937e-105
Dap	5.40017e-110	2.39429	0.46	0.136	1.18021e-105
Cstf3	3.39442e-108	-0.984698	0.519	0.789	7.41851e-104
Pbx3	5.37855e-108	-0.808548	0.602	0.858	1.17548e-103
Homer2	7.2837e-108	1.92319	0.467	0.134	1.59185e-103
Btf3	3.04147e-107	0.549772	0.866	0.98	6.64712e-103
Micos13	3.1219e-107	0.722901	0.843	0.971	6.82291e-103
Mbnl2	4.50309e-107	-0.606364	0.721	0.932	9.84151e-103
Gclc	5.14063e-107	-0.713244	0.648	0.882	1.12348e-102
Smim11	6.97295e-107	-0.961363	0.434	0.751	1.52394e-102
Ssbp4	9.34245e-107	-1.19155	0.497	0.783	2.04179e-102
Krtcap2	1.19838e-106	0.900357	0.853	0.964	2.61906e-102
Dock8	1.92494e-106	-1.5587	0.334	0.66	4.20695e-102
Ak7	2.10058e-106	4.35053	0.191	0.011	4.59081e-102
Pcf11	5.27987e-106	-1.21943	0.315	0.658	1.15391e-101
Son	5.41455e-106	-0.533696	0.796	0.982	1.18335e-101
Id4	3.13997e-105	-3.68834	0.045	0.411	6.86241e-101
Prnp	1.27025e-104	-0.358817	0.839	0.982	2.77613e-100
H2bu2	1.72117e-104	1.23702	0.795	0.888	3.76162e-100
Golga7b	6.29857e-104	-0.912306	0.603	0.857	1.37655e-99
Capns1	2.24714e-103	-0.893758	0.612	0.853	4.91112e-99
BC052040	1.36283e-102	-2.26259	0.076	0.441	2.97847e-98
Eef1a2	1.42087e-102	-0.540554	0.804	0.981	3.10532e-98
Snap25	1.44856e-102	-0.639278	0.783	0.972	3.16582e-98
Foxp1	3.73042e-102	-0.677343	0.737	0.955	8.15283e-98
Fos	9.8373e-102	-1.112	0.511	0.806	2.14994e-97
Kctd16	1.39346e-101	-0.9828	0.373	0.695	3.04542e-97
Cenpm	1.56764e-101	4.49569	0.182	0.01	3.42607e-97
Ankrd63	2.34112e-101	-0.796924	0.627	0.922	5.11652e-97
Atxn7l3b	2.64937e-101	-0.514701	0.81	0.98	5.7902e-97
Hmgcs1	9.96704e-101	-1.56075	0.344	0.659	2.1783e-96
Leng8	1.70967e-100	-0.710158	0.738	0.958	3.73649e-96
Ptma	1.85197e-100	-0.454795	0.9	0.993	4.04749e-96
Dcdc2a	2.71288e-100	1.41849	0.773	0.741	5.929e-96
Atox1	6.56926e-100	2.32338	0.506	0.197	1.43571e-95
Trps1	2.55776e-98	2.24374	0.485	0.163	5.58997e-94
Tec	2.2241e-97	3.39828	0.224	0.026	4.86078e-93
B4galt4	2.70037e-97	-1.28763	0.311	0.657	5.90165e-93
Hpcal1	4.31494e-97	-1.03082	0.545	0.813	9.43031e-93
Pcsk1n	1.54792e-96	-1.69057	0.197	0.569	3.38297e-92
S100a10	1.69147e-96	-2.49175	0.132	0.487	3.69672e-92
Armh4	1.79841e-96	-0.79667	0.305	0.651	3.93042e-92
Fam189a1	2.24627e-96	3.18155	0.288	0.052	4.90921e-92
Prkx	1.12759e-95	-0.845619	0.573	0.838	2.46434e-91
Hmgcr	2.23348e-95	-0.696774	0.409	0.723	4.88127e-91
Tspan3	3.6784e-95	-0.468847	0.774	0.962	8.03915e-91
Scg5	5.0332e-95	-0.450082	0.783	0.965	1.10001e-90
Card19	5.38035e-95	-1.3313	0.375	0.675	1.17587e-90
Bri3bp	7.90974e-95	2.8291	0.333	0.076	1.72867e-90
Jun	2.26812e-94	-0.960967	0.698	0.927	4.95698e-90
Gnpda2	2.3958e-94	-0.804392	0.668	0.898	5.23602e-90
Srebf2	3.54012e-94	-0.838974	0.466	0.752	7.73694e-90
Tmem74bos	6.01207e-94	-0.648444	0.761	0.964	1.31394e-89
Sae1	3.20733e-93	-0.562838	0.762	0.962	7.00961e-89
Cox20	5.18915e-93	-0.731087	0.583	0.823	1.13409e-88
Txlnb	9.35174e-93	4.15125	0.184	0.014	2.04382e-88
Rnf145	1.33563e-92	1.9018	0.736	0.533	2.91902e-88
H4c11	3.7989e-92	2.72115	0.319	0.071	8.3025e-88
Akr1a1	5.39789e-92	-0.672023	0.671	0.903	1.17971e-87
Hs3st1	1.33912e-91	-2.62979	0.044	0.375	2.92665e-87
Naxd	1.49858e-91	-0.564396	0.739	0.93	3.27514e-87
Pkm	2.40763e-90	-0.529248	0.8	0.98	5.26187e-86
Anapc11	2.49651e-90	-0.778374	0.655	0.875	5.45612e-86
Tpi1	2.7531e-90	-0.823129	0.628	0.856	6.0169e-86
Rbbp6	3.36458e-90	1.56295	0.748	0.654	7.35329e-86
Pgrmc1	5.77345e-90	-0.993595	0.338	0.655	1.26179e-85
Camk2d	1.16209e-89	-0.67078	0.672	0.877	2.53975e-85
Gnb1	2.61526e-89	-0.400911	0.937	0.994	5.71565e-85
Rab28	4.37328e-89	-0.634714	0.71	0.939	9.55781e-85
Plaat3	5.39379e-89	0.774717	0.836	0.972	1.17881e-84
Celf3	1.27851e-88	-0.736126	0.656	0.879	2.79417e-84
Cox5a	1.3056e-88	-0.486683	0.817	0.983	2.85339e-84
Msmo1	1.96684e-88	-0.702342	0.393	0.684	4.29853e-84
Chchd10	4.90006e-88	-0.633997	0.779	0.977	1.07091e-83
Psmb2	5.49781e-88	0.797836	0.812	0.952	1.20155e-83
Smpd3	6.2367e-88	3.33317	0.183	0.016	1.36303e-83
Gng8	8.62084e-88	0.400371	0.928	0.989	1.88408e-83
Prune2	1.54925e-87	-0.655295	0.722	0.942	3.38588e-83
Calm3	1.61109e-87	-0.457197	0.831	0.987	3.52104e-83
Kcnk10	5.1755e-87	-0.845531	0.518	0.775	1.13111e-82
Resp18	5.55698e-87	-1.34442	0.356	0.69	1.21448e-82
Laptm4b	5.73118e-87	-0.807498	0.256	0.576	1.25255e-82
Vdac1	7.35757e-87	-0.573746	0.759	0.967	1.608e-82
Bag1	7.66173e-87	-0.592949	0.771	0.966	1.67447e-82
Eif1b	1.18903e-86	-0.50796	0.764	0.962	2.59862e-82
Sec61b	5.96603e-86	0.816391	0.818	0.968	1.30388e-81
Cst6	6.19156e-86	1.22666	0.81	0.887	1.35317e-81
Sorl1	6.99593e-86	-0.39114	0.597	0.844	1.52896e-81
Hnrnpa3	7.42539e-86	-0.529441	0.765	0.963	1.62282e-81
Vmp1	1.53552e-85	2.2653	0.738	0.59	3.35588e-81
Cdhr1	2.55232e-85	-0.302698	0.651	0.87	5.57808e-81
Arglu1	3.27545e-85	-0.682104	0.746	0.956	7.1585e-81
Mat2b	3.36014e-85	-0.557122	0.759	0.963	7.34359e-81
Selenok	9.54719e-85	0.334435	0.928	0.988	2.08654e-80
Pacsin3	2.60357e-84	-0.985775	0.537	0.774	5.69011e-80
Atp2b2	3.80802e-84	-0.273028	0.803	0.964	8.32244e-80
Rgs3	5.01636e-84	-4.32691	0.031	0.338	1.09633e-79
Mfge8	6.49052e-84	1.36769	0.86	0.885	1.4185e-79
Carhsp1	7.32916e-84	2.17665	0.379	0.11	1.60179e-79
Atxn2l	1.65305e-83	-0.703061	0.641	0.878	3.61275e-79
Cers2	3.7158e-83	-3.52187	0.035	0.342	8.12088e-79
Fam47e	4.64723e-83	2.27203	0.36	0.102	1.01565e-78
Sncg	4.8681e-83	7.20448	0.137	0.005	1.06392e-78
Rsu1	5.39748e-83	-0.889635	0.58	0.825	1.17962e-78
Mab21l1	6.58198e-83	-1.08879	0.509	0.752	1.43849e-78
Pcdh9	6.8595e-83	1.91594	0.695	0.438	1.49914e-78
Aldh2	7.45906e-83	-0.984492	0.365	0.661	1.63018e-78
Zcchc12	8.3932e-83	-1.28557	0.262	0.58	1.83433e-78
Tubb3	1.0711e-82	0.675894	0.838	0.974	2.34089e-78
Ctnnbip1	2.32578e-82	-0.560782	0.615	0.845	5.08299e-78
Klf13	3.10221e-82	-0.725508	0.559	0.802	6.77987e-78
Lrrn3	6.03878e-82	-1.83283	0.175	0.496	1.31978e-77
Uchl1	1.35708e-81	-0.390564	0.869	0.989	2.9659e-77
Ptpn1	1.6591e-81	-0.766583	0.638	0.851	3.62596e-77
Ube2n	2.06403e-81	-0.596019	0.75	0.962	4.51095e-77
Sema3e	3.71354e-81	-1.58282	0.069	0.384	8.11594e-77
St6gal1	4.61596e-81	-3.37092	0.027	0.327	1.00882e-76
Magi2	4.79082e-81	-0.880252	0.579	0.815	1.04703e-76
Ppp2cb	4.91496e-81	-0.714263	0.65	0.883	1.07417e-76
Rpl37a	6.17439e-81	-0.379496	0.893	0.993	1.34941e-76
Akr1b3	7.55521e-81	1.54755	0.746	0.684	1.65119e-76
Rps2	8.54453e-81	-0.427509	0.851	0.989	1.86741e-76
Vapb	9.29708e-81	-0.63267	0.649	0.87	2.03188e-76
Trp53rkb	1.07057e-80	-1.17891	0.409	0.69	2.33974e-76
Wdsub1	1.23035e-80	-0.675888	0.697	0.926	2.68893e-76
Ccdc28b	1.91036e-80	-0.922577	0.574	0.797	4.17509e-76
Dpysl2	2.59325e-80	-0.562829	0.785	0.976	5.66754e-76
Meis1	3.09417e-80	-2.30061	0.117	0.432	6.76231e-76
Casp3	4.34191e-80	-1.21939	0.499	0.771	9.48924e-76
Jup	5.6048e-80	-1.04098	0.48	0.727	1.22493e-75
Cmpk1	5.7958e-80	-0.516779	0.764	0.967	1.26667e-75
Atp11a	8.09011e-80	-0.649528	0.455	0.717	1.76809e-75
Efna5	1.08782e-79	-0.608309	0.682	0.886	2.37744e-75
Sv2a	1.22421e-79	-0.901783	0.369	0.647	2.67552e-75
Plk2	1.58512e-79	-2.42237	0.114	0.428	3.46428e-75
Ncoa1	2.85718e-79	-0.584554	0.637	0.873	6.24437e-75
Gadd45gip1	3.60332e-79	-0.909052	0.489	0.735	7.87506e-75
Atp9a	3.84255e-79	-0.335993	0.671	0.864	8.3979e-75
Syn2	3.94183e-79	-1.03423	0.499	0.74	8.61487e-75
Tnrc6b	5.4342e-79	-0.609519	0.631	0.846	1.18764e-74
Pnrc1	8.56334e-79	-0.656503	0.702	0.919	1.87152e-74
Samd14	1.0424e-78	-1.35078	0.305	0.599	2.27818e-74
Ccdc184	1.18697e-78	-1.01477	0.465	0.733	2.59412e-74
Fermt2	1.3363e-78	-1.01472	0.409	0.678	2.92049e-74
Tmem184a	1.43976e-78	2.10167	0.413	0.142	3.14659e-74
Tecr	2.61739e-78	0.424503	0.939	0.988	5.7203e-74
Tspan18	3.23434e-78	-2.87144	0.099	0.406	7.06865e-74
Csnk1a1	4.84213e-78	-0.49386	0.753	0.952	1.05825e-73
Slc12a2	6.1495e-78	1.2554	0.865	0.919	1.34397e-73
Oaz1	1.29606e-77	-0.397942	0.863	0.988	2.83255e-73
Psen2	1.68624e-77	-0.617496	0.524	0.767	3.68527e-73
Jade1	1.95228e-77	-0.836645	0.499	0.748	4.26671e-73
Pten	2.15606e-77	-0.677358	0.658	0.872	4.71207e-73
Slc35b1	2.68086e-77	1.35199	0.789	0.806	5.85903e-73
Cfap69	2.80856e-77	-0.866507	0.535	0.782	6.1381e-73
Kif1b	3.1323e-77	-0.630954	0.673	0.893	6.84564e-73
Hivep2	4.73054e-77	-3.77595	0.037	0.329	1.03386e-72
Htra3	6.25611e-77	3.04812	0.258	0.053	1.36727e-72
Btg2	6.37448e-77	-1.56799	0.232	0.531	1.39314e-72
Ywhaz	7.63155e-77	-0.58416	0.742	0.963	1.66788e-72
Hmgb2	2.46057e-76	-0.660412	0.643	0.86	5.37757e-72
Guk1	2.55154e-76	1.04745	0.802	0.927	5.57639e-72
mt-Atp6	4.77427e-76	0.784815	0.989	0.994	1.04342e-71
Insm1	5.62346e-76	-2.23536	0.101	0.404	1.22901e-71
Ergic2	6.50454e-76	1.0856	0.795	0.866	1.42157e-71
Pappa	9.11098e-76	-1.32992	0.264	0.553	1.99121e-71
Ywhab	9.99396e-76	-0.48958	0.763	0.963	2.18418e-71
Ndrg4	1.0211e-75	-0.911024	0.46	0.717	2.23162e-71
Mrpl58	2.38975e-75	-0.627945	0.683	0.899	5.2228e-71
Dut	2.45507e-75	1.1107	0.765	0.86	5.36555e-71
Spsb3	2.68643e-75	-1.04224	0.499	0.739	5.87118e-71
Isg20	2.92255e-75	2.20693	0.383	0.13	6.38724e-71
Wbp2	4.21177e-75	-0.611211	0.705	0.91	9.20483e-71
Ddrgk1	5.83353e-75	0.664553	0.849	0.971	1.27492e-70
Dclk1	5.90021e-75	2.48318	0.361	0.11	1.28949e-70
Enpp5	7.54234e-75	-0.340653	0.601	0.828	1.64838e-70
Steap1	1.21086e-74	3.26856	0.278	0.069	2.64634e-70
Reps2	1.21457e-74	2.09082	0.499	0.209	2.65445e-70
Dusp14	2.26896e-74	-0.615594	0.684	0.903	4.95882e-70
Stom	2.65999e-74	1.11708	0.902	0.967	5.8134e-70
Slco3a1	3.01507e-74	-0.752909	0.321	0.601	6.58943e-70
Adipor1	3.22273e-74	-0.626752	0.599	0.816	7.04327e-70
Elavl3	3.62976e-74	-0.451211	0.818	0.982	7.93283e-70
Tmem234	3.75438e-74	-0.479606	0.736	0.939	8.2052e-70
Rd3	4.00591e-74	0.79102	0.798	0.948	8.75492e-70
Crmp1	5.49022e-74	-1.06531	0.385	0.648	1.19989e-69
H2-M10.2	7.06566e-74	5.57313	0.127	0.005	1.5442e-69
Wbp4	1.41567e-73	-0.552736	0.678	0.881	3.09394e-69
Cend1	1.77545e-73	-0.679268	0.671	0.896	3.88024e-69
Smim12	1.81185e-73	-0.849377	0.587	0.81	3.9598e-69
Dph6	2.16462e-73	-1.08083	0.434	0.67	4.73078e-69
Usf2	2.6885e-73	-0.795285	0.567	0.801	5.87571e-69
Ech1	4.12865e-73	-2.95629	0.049	0.334	9.02317e-69
Sil1	4.15495e-73	2.32114	0.599	0.338	9.08063e-69
Avl9	5.09968e-73	-0.55452	0.565	0.789	1.11453e-68
Grin3a	5.23771e-73	5.65917	0.129	0.006	1.1447e-68
mt-Nd4	5.99045e-73	0.902413	0.955	0.985	1.30921e-68
Eif4h	8.61034e-73	-0.769641	0.573	0.799	1.88179e-68
Slc4a8	9.48173e-73	-0.766513	0.463	0.711	2.07223e-68
Tmem151a	1.07445e-72	-0.86585	0.476	0.723	2.34821e-68
Srebf1	2.46878e-72	-1.40972	0.196	0.488	5.39553e-68
Gipc3	2.48357e-72	1.91324	0.488	0.209	5.42784e-68
Ramac	2.56098e-72	-0.552121	0.722	0.93	5.59703e-68
Itga1	3.56606e-72	-1.46137	0.187	0.504	7.79363e-68
Prps1	3.94098e-72	-0.697364	0.591	0.82	8.61301e-68
Pcmtd1	4.23933e-72	-0.879314	0.47	0.703	9.26505e-68
Acss2	7.37709e-72	-0.847172	0.252	0.532	1.61226e-67
Chmp4b	8.98239e-72	-0.583529	0.683	0.907	1.9631e-67
Nagk	9.68843e-72	-0.865568	0.475	0.724	2.11741e-67
Slc25a3	9.80401e-72	-0.494645	0.775	0.966	2.14267e-67
Mymk	2.65177e-71	6.45337	0.114	0.003	5.79543e-67
Mapk8ip2	4.02485e-71	-0.527812	0.759	0.956	8.7963e-67
Smap1	4.69904e-71	-0.452942	0.732	0.954	1.02698e-66
Atp6v1a	5.60968e-71	-0.51488	0.732	0.941	1.226e-66
Klf2	6.7922e-71	2.59208	0.257	0.058	1.48444e-66
Cir1	7.99113e-71	-0.67874	0.574	0.812	1.74646e-66
Grk2	1.28362e-70	-0.564522	0.682	0.899	2.80534e-66
Mycbp2	2.06713e-70	-0.265409	0.71	0.915	4.51772e-66
Phactr2	2.84531e-70	-3.27498	0.031	0.302	6.21842e-66
Mettl26	4.93701e-70	-0.748699	0.584	0.806	1.07898e-65
Trafd1	5.21672e-70	-0.671005	0.632	0.85	1.14011e-65
Scg3	6.69427e-70	0.80071	0.928	0.982	1.46303e-65
Cyp51	7.08254e-70	-0.72287	0.529	0.754	1.54789e-65
Kmt2e	8.7171e-70	-0.720288	0.499	0.744	1.90512e-65
Fam129a	8.84408e-70	2.89675	0.217	0.04	1.93287e-65
Srsf2	1.06203e-69	-0.566467	0.752	0.957	2.32106e-65
Kat6a	1.39675e-69	-0.67601	0.584	0.819	3.05261e-65
Arhgef28	1.40467e-69	-0.704732	0.553	0.786	3.06992e-65
Nipsnap3b	2.97793e-69	-0.939226	0.417	0.665	6.50827e-65
Mmp28	3.38366e-69	5.92507	0.103	0.001	7.395e-65
Gnas	4.81739e-69	-0.446512	0.8	0.976	1.05284e-64
Tstd1	5.35558e-69	-0.441973	0.8	0.974	1.17046e-64
Gabarapl1	6.27146e-69	-0.49167	0.686	0.892	1.37063e-64
Mxi1	8.11498e-69	-0.700437	0.498	0.737	1.77353e-64
Tra2b	1.90486e-68	-0.710326	0.667	0.885	4.16307e-64
Gabbr2	2.51643e-68	-0.485844	0.672	0.873	5.49966e-64
Pdlim1	3.11326e-68	2.75067	0.185	0.028	6.80403e-64
Commd7	4.72616e-68	-0.741967	0.605	0.817	1.0329e-63
Ly96	2.14501e-67	-1.22982	0.401	0.646	4.68792e-63
Lrpap1	2.15875e-67	-0.383033	0.601	0.816	4.71795e-63
Rbm11	2.31887e-67	-1.38273	0.325	0.587	5.06788e-63
Mcub	4.62976e-67	-1.44869	0.256	0.533	1.01183e-62
Cbx6	5.15466e-67	-0.683963	0.47	0.711	1.12655e-62
Inka2	5.51794e-67	2.16118	0.269	0.067	1.20595e-62
Ptp4a2	7.18192e-67	-0.549889	0.542	0.772	1.56961e-62
Syt5	9.33206e-67	-1.14656	0.231	0.509	2.03952e-62
Tshz2	1.13669e-66	-0.421357	0.833	0.985	2.48424e-62
Serpine2	2.45156e-66	0.752133	0.953	0.99	5.35788e-62
Gabbr1	2.72085e-66	-0.220695	0.658	0.881	5.94641e-62
R3hdm4	2.93118e-66	-0.61529	0.622	0.828	6.4061e-62
Clic1	2.9778e-66	-0.376108	0.768	0.964	6.50797e-62
Zc2hc1a	3.53953e-66	-0.619648	0.679	0.89	7.73564e-62
Igf1r	5.67522e-66	-0.160265	0.726	0.908	1.24032e-61
Spats2	1.09995e-65	0.951393	0.773	0.882	2.40395e-61
Rsbn1l	1.32047e-65	-0.588479	0.665	0.873	2.88588e-61
Pth2	1.45128e-65	-1.52981	0.282	0.546	3.17176e-61
Dusp8	2.45765e-65	-0.656097	0.608	0.83	5.37119e-61
Syngr3	2.6231e-65	-0.81851	0.341	0.595	5.73279e-61
H2-M10.4	4.30322e-65	9.04728	0.153	0.01	9.40468e-61
Cobl	4.64497e-65	-4.8657	0.015	0.262	1.01516e-60
Zmiz1	7.13882e-65	-0.399001	0.734	0.927	1.56019e-60
Stx2	7.25036e-65	-0.558013	0.68	0.886	1.58457e-60
Fhod3	7.92825e-65	2.92526	0.171	0.024	1.73272e-60
Rps6	1.3179e-64	-0.481711	0.782	0.974	2.88027e-60
Plscr1	1.57497e-64	-0.998123	0.496	0.724	3.4421e-60
Ccdc59	1.95963e-64	-0.498907	0.643	0.847	4.28278e-60
Coq7	2.02832e-64	-0.662041	0.529	0.741	4.43289e-60
Dpysl5	2.6048e-64	-0.647083	0.538	0.741	5.69279e-60
Sdcbp	2.64762e-64	-0.472352	0.752	0.955	5.78637e-60
Pdrg1	3.20321e-64	-0.526558	0.682	0.896	7.00061e-60
Snapc5	3.28319e-64	-0.524851	0.643	0.85	7.17541e-60
Prrg4	3.364e-64	-2.37435	0.07	0.336	7.35202e-60
mt-Co2	3.66711e-64	0.725861	0.985	0.993	8.01448e-60
Sfr1	5.17832e-64	-0.676305	0.681	0.892	1.13172e-59
Slc25a4	5.68986e-64	-0.517686	0.683	0.898	1.24352e-59
Bex3	6.2515e-64	-0.520213	0.727	0.939	1.36627e-59
Ank3	6.42021e-64	-0.414289	0.682	0.888	1.40314e-59
Tmem256	9.13359e-64	-0.468738	0.752	0.955	1.99615e-59
Arhgap24	9.44727e-64	4.98086	0.105	0.004	2.0647e-59
Rragd	9.71864e-64	-0.535804	0.712	0.931	2.12401e-59
Rad23a	1.87329e-63	-0.765691	0.612	0.813	4.09407e-59
Gm4847	2.23853e-63	5.55438	0.099	0.002	4.8923e-59
Hprt	2.24954e-63	-0.480469	0.746	0.954	4.91637e-59
Sec14l5	2.36532e-63	-1.31316	0.235	0.501	5.16941e-59
Agtpbp1	2.41002e-63	-0.530293	0.69	0.894	5.2671e-59
Med30	2.92422e-63	-0.487523	0.742	0.937	6.39089e-59
Cd164	4.2728e-63	-0.657277	0.422	0.653	9.33821e-59
Dpm1	5.88393e-63	-0.435786	0.675	0.894	1.28593e-58
Rhoq	9.84636e-63	-0.662173	0.613	0.829	2.15192e-58
Prrc2c	1.0334e-62	-0.508661	0.691	0.901	2.2585e-58
Rpl8	1.10923e-62	-0.382603	0.843	0.991	2.42422e-58
Dhcr24	1.14284e-62	-1.05864	0.252	0.518	2.49767e-58
Casz1	1.22822e-62	-0.46568	0.725	0.928	2.68427e-58
Smim22	1.2359e-62	-0.543067	0.71	0.907	2.70106e-58
Tnrc6c	2.00855e-62	-0.206236	0.777	0.964	4.38968e-58
Pnn	2.4977e-62	-0.523948	0.686	0.89	5.45873e-58
Bhlhe40	2.51927e-62	-1.2338	0.315	0.578	5.50586e-58
Idh3a	2.91255e-62	-0.662325	0.605	0.807	6.36538e-58
Rrp1	3.25322e-62	-0.487393	0.709	0.928	7.10991e-58
Rab6b	3.47996e-62	-0.387434	0.792	0.966	7.60544e-58
Rfx3	3.71473e-62	-0.799855	0.475	0.699	8.11854e-58
Pomgnt2	4.17207e-62	-0.273775	0.633	0.827	9.11807e-58
Hacd2	5.73367e-62	-0.499534	0.54	0.747	1.25309e-57
Camta1	5.75217e-62	-0.362281	0.612	0.831	1.25714e-57
Snrk	6.12613e-62	-0.47772	0.494	0.721	1.33887e-57
Limch1	7.35806e-62	-0.623296	0.623	0.823	1.6081e-57
Rp2	1.67059e-61	-1.48479	0.205	0.466	3.65108e-57
Dtx1	1.75572e-61	-0.647363	0.516	0.735	3.83714e-57
Slc8a1	3.35252e-61	-1.07609	0.152	0.433	7.32693e-57
Arl6ip5	3.57694e-61	-0.336368	0.688	0.895	7.81741e-57
Galm	3.7669e-61	3.38536	0.2	0.04	8.23257e-57
C77080	4.96003e-61	-2.04846	0.119	0.384	1.08402e-56
Chtop	5.47978e-61	-0.607355	0.677	0.877	1.19761e-56
Ubxn2a	6.15623e-61	-0.583169	0.67	0.864	1.34544e-56
Eno2	6.53499e-61	-1.9161	0.159	0.421	1.42822e-56
Ptprn	6.84951e-61	-0.905395	0.162	0.44	1.49696e-56
Stxbp6	7.02346e-61	2.30923	0.171	0.027	1.53498e-56
Ttc5	7.93521e-61	-0.587481	0.628	0.852	1.73424e-56
Fam221a	8.08848e-61	-0.943648	0.343	0.585	1.76774e-56
Inafm2	8.24204e-61	-0.379203	0.783	0.971	1.8013e-56
Epcam	9.58613e-61	0.549523	0.949	0.989	2.09505e-56
Fmn2	9.66516e-61	-0.447868	0.608	0.815	2.11232e-56
Ebf2	1.07277e-60	-0.501812	0.719	0.902	2.34454e-56
Slbp	1.08416e-60	-0.762356	0.502	0.725	2.36943e-56
Snx3	1.14242e-60	-0.503095	0.74	0.947	2.49677e-56
Ccdc136	1.36475e-60	2.01855	0.452	0.203	2.98266e-56
Nhlh1	1.47196e-60	-0.529796	0.721	0.927	3.21697e-56
Wdr1	1.56169e-60	-0.507789	0.656	0.86	3.41307e-56
BC005624	1.86602e-60	-0.517134	0.673	0.88	4.07818e-56
Arl6	2.04624e-60	-0.376973	0.72	0.929	4.47205e-56
Cfap36	2.0761e-60	-0.450604	0.761	0.967	4.53731e-56
Elavl4	2.16987e-60	-0.72239	0.586	0.813	4.74225e-56
Galnt16	2.40502e-60	5.31906	0.105	0.005	5.25617e-56
Srrm2	2.59181e-60	-0.423734	0.802	0.98	5.6644e-56
Ppp3cc	2.78776e-60	-0.683722	0.578	0.778	6.09266e-56
Rbm15b	3.0276e-60	-0.47522	0.676	0.889	6.61682e-56
Ctsl	3.41016e-60	-0.19119	0.676	0.89	7.45291e-56
Arfgef3	5.13437e-60	-0.688815	0.461	0.687	1.12212e-55
Lgals3bp	5.23965e-60	-0.957641	0.062	0.316	1.14513e-55
Lrrc42	8.48815e-60	-1.65304	0.195	0.446	1.85509e-55
Cd200	1.21964e-59	-4.32721	0.03	0.265	2.66552e-55
Rp9	2.02041e-59	-0.491837	0.693	0.893	4.4156e-55
Tmem200a	3.25708e-59	-0.818613	0.28	0.545	7.11834e-55
Bace1	3.26954e-59	-0.446528	0.565	0.761	7.14558e-55
Cyp1b1	3.57567e-59	3.44636	0.129	0.012	7.81464e-55
Luc7l3	5.04162e-59	-0.606267	0.665	0.871	1.10185e-54
Stat3	5.56267e-59	-0.760159	0.475	0.69	1.21572e-54
Pomgnt1	6.57125e-59	-1.1324	0.378	0.596	1.43615e-54
Dtd1	6.58644e-59	-0.658246	0.568	0.8	1.43947e-54
mt-Nd2	6.68093e-59	0.812415	0.941	0.983	1.46012e-54
Ybx1	7.96304e-59	-0.42883	0.773	0.972	1.74032e-54
Vasp	8.02998e-59	-0.936023	0.436	0.653	1.75495e-54
Pbrm1	1.23311e-58	-0.587386	0.608	0.818	2.69496e-54
Ppp1r42	1.49185e-58	-1.73797	0.17	0.426	3.26044e-54
Lpcat2	1.51972e-58	-0.645243	0.499	0.722	3.32135e-54
Pbx1	1.52348e-58	-0.55391	0.601	0.814	3.32957e-54
Rpsa	1.5948e-58	-0.386327	0.846	0.987	3.48544e-54
Hspa8	2.12948e-58	-0.360303	0.886	0.991	4.65397e-54
Gm16286	2.86357e-58	-0.594655	0.609	0.816	6.25834e-54
Lamp1	3.10831e-58	-0.154517	0.863	0.981	6.79321e-54
Dhx15	4.85775e-58	-0.747339	0.554	0.76	1.06166e-53
Mageh1	6.14614e-58	-0.383699	0.694	0.898	1.34324e-53
Hdlbp	8.94126e-58	-0.416433	0.793	0.976	1.95411e-53
Pde11a	9.18106e-58	1.78141	0.214	0.048	2.00652e-53
Apbb1	1.31044e-57	-0.515953	0.69	0.893	2.86397e-53
Tsen34	1.49705e-57	-1.06595	0.324	0.566	3.27181e-53
Vmn2r3	1.84255e-57	3.2008	0.295	0.104	4.02689e-53
Fuca2	2.875e-57	-0.447365	0.439	0.665	6.28332e-53
Pdpk1	3.00619e-57	-0.554519	0.595	0.792	6.57003e-53
Racgap1	3.86093e-57	1.35184	0.693	0.54	8.43806e-53
Dcx	4.10673e-57	-1.37355	0.163	0.426	8.97525e-53
Mapk8ip3	6.44168e-57	-0.782052	0.479	0.696	1.40783e-52
Stard4	7.88475e-57	-1.89963	0.08	0.325	1.72321e-52
Tpt1	9.12513e-57	-0.34663	0.907	0.995	1.9943e-52
Ifngr1	9.41784e-57	-1.77368	0.056	0.297	2.05827e-52
Reep5	9.51743e-57	0.485213	0.873	0.98	2.08004e-52
Mapk8ip1	1.01771e-56	-0.524185	0.703	0.92	2.22421e-52
Nucb2	1.04079e-56	1.88628	0.69	0.559	2.27464e-52
Blmh	1.06946e-56	-0.982022	0.227	0.483	2.33731e-52
Tspyl1	1.11515e-56	-0.750118	0.508	0.729	2.43717e-52
Atp6v0e2	1.18207e-56	-0.545573	0.589	0.793	2.58342e-52
Plekhb2	1.24523e-56	-1.39642	0.251	0.495	2.72146e-52
Tcp11	1.31224e-56	3.7234	0.13	0.014	2.8679e-52
Frmd3	1.58642e-56	-0.472219	0.686	0.889	3.46712e-52
Pim3	1.75199e-56	-0.638064	0.553	0.768	3.82897e-52
Ypel3	1.91897e-56	-0.366867	0.846	0.985	4.19392e-52
Cdv3	2.19962e-56	-0.527238	0.723	0.924	4.80728e-52
Tlk1	2.21522e-56	-0.628783	0.535	0.743	4.84136e-52
Stt3b	2.23954e-56	1.64639	0.686	0.489	4.89451e-52
Dlx5	2.62802e-56	-0.583059	0.676	0.881	5.74353e-52
Cpq	2.87853e-56	-0.925533	0.073	0.318	6.29104e-52
1810062G17Rik	2.91609e-56	2.03845	0.269	0.077	6.37311e-52
5730409E04Rik	3.83549e-56	3.05253	0.141	0.018	8.38246e-52
Kantr	4.61752e-56	-1.02752	0.338	0.57	1.00916e-51
Sec61g	5.41029e-56	0.491203	0.838	0.976	1.18242e-51
Etv5	6.90956e-56	-2.12562	0.106	0.355	1.51008e-51
Ank2	8.27321e-56	-0.344774	0.785	0.968	1.80811e-51
Btbd10	8.51665e-56	-0.570686	0.656	0.864	1.86131e-51
Pgk1	9.18545e-56	-0.476548	0.699	0.897	2.00748e-51
Elovl7	1.09748e-55	-1.31653	0.156	0.404	2.39855e-51
Ablim1	1.15487e-55	-0.425491	0.646	0.844	2.52398e-51
Degs1	1.21083e-55	-0.561403	0.418	0.64	2.64627e-51
Tnfrsf21	1.29613e-55	-0.395058	0.584	0.787	2.83269e-51
Tia1	1.95284e-55	-0.554242	0.654	0.855	4.26792e-51
Pfn2	1.9611e-55	-0.497429	0.702	0.911	4.28599e-51
Osbpl1a	2.21458e-55	-0.501314	0.725	0.934	4.83996e-51
Btg1	2.32516e-55	-0.905714	0.331	0.565	5.08163e-51
mt-Co3	2.59088e-55	0.751767	0.977	0.99	5.66237e-51
Plch2	2.82993e-55	-0.65684	0.552	0.748	6.1848e-51
H4c1	3.54575e-55	3.1911	0.145	0.02	7.74925e-51
Rnf14	4.28214e-55	-0.685714	0.543	0.753	9.35861e-51
Aen	4.70787e-55	1.47111	0.662	0.511	1.02891e-50
Ahcyl2	5.52838e-55	-0.912202	0.443	0.661	1.20823e-50
Gsn	5.66272e-55	-1.22447	0.292	0.524	1.23759e-50
Hacd1	5.81482e-55	-0.610036	0.603	0.799	1.27083e-50
Gyg	6.21641e-55	1.23251	0.699	0.584	1.3586e-50
Nqo1	7.23981e-55	-2.22523	0.161	0.404	1.58226e-50
Nudt5	8.11428e-55	-0.522096	0.723	0.915	1.77338e-50
Zfp462	8.47254e-55	-0.541538	0.5	0.696	1.85167e-50
Txnrd1	8.6316e-55	-0.744005	0.438	0.653	1.88644e-50
Nol7	1.14264e-54	-0.397032	0.749	0.954	2.49725e-50
Mapt	1.15248e-54	-0.504918	0.634	0.845	2.51875e-50
Emc10	1.3566e-54	-0.257706	0.685	0.871	2.96485e-50
Tmem47	1.47477e-54	-1.191	0.189	0.432	3.2231e-50
Hmgb1	1.62187e-54	-0.390344	0.803	0.98	3.5446e-50
Pde8b	1.81057e-54	-0.896672	0.361	0.609	3.95699e-50
Sh3bp5	2.11898e-54	-0.784708	0.544	0.736	4.63104e-50
Rnaseh2a	2.23784e-54	1.64305	0.516	0.273	4.8908e-50
Ndufb2	2.49006e-54	-0.368827	0.751	0.953	5.44203e-50
Fip1l1	2.67116e-54	-0.570886	0.578	0.775	5.83782e-50
Dnal4	3.19254e-54	-0.985428	0.411	0.629	6.9773e-50
Kcnh3	3.69246e-54	-0.957782	0.368	0.587	8.06987e-50
Tspan12	4.22238e-54	-1.10894	0.14	0.398	9.22802e-50
Zfp91.1	5.03321e-54	-0.780368	0.484	0.672	1.10001e-49
Tmx3	5.92114e-54	1.32415	0.853	0.895	1.29406e-49
Med13l	8.00776e-54	-1.44894	0.296	0.522	1.7501e-49
Pura	8.31058e-54	-0.522545	0.67	0.852	1.81628e-49
Ldlr	1.10413e-53	-0.172651	0.197	0.452	2.41308e-49
Ccne1	1.42307e-53	3.43471	0.134	0.017	3.11011e-49
Hopx	1.46014e-53	-2.14212	0.089	0.33	3.19113e-49
Tmem183a	2.20808e-53	-4.28211	0.02	0.232	4.82576e-49
Wdr6	2.3046e-53	-0.814999	0.479	0.68	5.03671e-49
Trim47	2.97519e-53	4.6211	0.092	0.004	6.50227e-49
Ptpn13	3.66249e-53	4.45326	0.087	0.003	8.00438e-49
Rab12	4.52686e-53	-1.87379	0.163	0.401	9.89346e-49
Slc14a2	4.9468e-53	-0.367437	0.348	0.59	1.08112e-48
Rpl19	5.56155e-53	-0.320762	0.891	0.993	1.21548e-48
Arid1b	5.77831e-53	-0.619431	0.513	0.708	1.26285e-48
Elf2	7.89364e-53	-0.771248	0.592	0.779	1.72516e-48
Sgta	8.6662e-53	-0.67532	0.558	0.753	1.894e-48
Stx12	9.54347e-53	-0.395176	0.751	0.957	2.08573e-48
Rtp4	9.96233e-53	-1.47537	0.106	0.348	2.17727e-48
Mex3c	1.25152e-52	-0.692887	0.494	0.7	2.73519e-48
Gas6	1.27546e-52	-0.313924	0.649	0.857	2.78753e-48
Agpat4	1.36173e-52	-0.174363	0.693	0.876	2.97605e-48
Gnb2	1.4916e-52	-0.953865	0.292	0.542	3.25988e-48
Klhl13	1.70857e-52	1.92221	0.271	0.084	3.73409e-48
Rsrc1	1.74905e-52	-0.533017	0.665	0.864	3.82254e-48
Lsr	2.32808e-52	-0.527425	0.573	0.766	5.08801e-48
Minar1	2.36667e-52	-4.50724	0.019	0.227	5.17235e-48
Cdkn2d	2.57536e-52	-0.755082	0.507	0.715	5.62846e-48
Gadl1	2.59055e-52	-0.914992	0.342	0.578	5.66164e-48
Trarg1	2.69689e-52	-0.8876	0.38	0.608	5.89406e-48
Pclo	2.73358e-52	-0.562086	0.423	0.629	5.97424e-48
Snrpb	3.21203e-52	-0.500663	0.693	0.898	7.01989e-48
Podxl2	3.70339e-52	-0.423903	0.663	0.843	8.09377e-48
Arap2	4.27298e-52	-0.475777	0.647	0.838	9.3386e-48
Ccl27a	4.504e-52	-0.923999	0.401	0.616	9.84349e-48
Rasal2	5.75917e-52	-0.412338	0.735	0.928	1.25867e-47
Rpl35	6.27641e-52	-0.39209	0.827	0.981	1.37171e-47
Nptx2	8.54987e-52	-0.325764	0.53	0.724	1.86857e-47
Traf4	1.00741e-51	-1.61442	0.2	0.431	2.2017e-47
Slc38a2	1.12162e-51	-0.37884	0.634	0.839	2.4513e-47
Plxnd1	1.61819e-51	2.96053	0.086	0.003	3.53655e-47
B230219D22Rik	1.66606e-51	-0.350505	0.747	0.942	3.64118e-47
Sem1	1.77297e-51	0.251481	0.867	0.985	3.87483e-47
Epb41l1	1.79416e-51	-0.707534	0.529	0.723	3.92114e-47
Slc4a4	1.89026e-51	-2.54453	0.022	0.23	4.13117e-47
Eef1a1	2.03737e-51	-0.373188	0.884	0.994	4.45268e-47
Kras	2.22852e-51	-0.580584	0.653	0.867	4.87043e-47
Ivns1abp	2.80465e-51	1.01751	0.76	0.776	6.12957e-47
Glul	2.81013e-51	-1.37645	0.285	0.507	6.14154e-47
Lurap1	3.37989e-51	-1.23812	0.229	0.462	7.38675e-47
March7	3.4787e-51	-0.473116	0.579	0.773	7.60269e-47
mt-Nd3	3.69686e-51	0.934159	0.892	0.962	8.07949e-47
Jpt1	4.30472e-51	-0.537357	0.641	0.838	9.40796e-47
Nxnl2	4.34727e-51	-0.523627	0.705	0.908	9.50097e-47
Ppig	4.39652e-51	-0.470608	0.698	0.9	9.60859e-47
Sobp	4.87585e-51	-1.18181	0.235	0.471	1.06562e-46
Junb	4.97197e-51	-0.854485	0.527	0.755	1.08662e-46
Srrm1	6.17197e-51	-0.58185	0.649	0.848	1.34888e-46
Smad1	6.87318e-51	-1.64162	0.209	0.441	1.50213e-46
Ptges3	9.33677e-51	-0.415306	0.713	0.912	2.04055e-46
Rsph1	9.51963e-51	-0.782317	0.444	0.653	2.08052e-46
Ngrn	9.55199e-51	-0.49957	0.695	0.894	2.08759e-46
Fam241b	1.00964e-50	-0.49133	0.653	0.842	2.20656e-46
Pde1c	1.37554e-50	-0.473634	0.605	0.796	3.00624e-46
Hsph1	1.5332e-50	-2.86028	0.07	0.29	3.35081e-46
Snx32	1.79573e-50	-0.792705	0.522	0.714	3.92456e-46
Kctd5	2.64902e-50	-0.457218	0.623	0.816	5.78943e-46
Hp1bp3	2.80184e-50	-0.457796	0.711	0.901	6.12342e-46
Hspa2	2.90891e-50	-0.764566	0.55	0.75	6.35742e-46
Galnt17	3.08736e-50	-4.7293	0.015	0.214	6.74742e-46
Zfp385b	3.32316e-50	-0.827315	0.456	0.648	7.26277e-46
Eci2	3.35132e-50	-0.431511	0.728	0.932	7.32431e-46
Hmgb3	4.14214e-50	-0.781891	0.47	0.668	9.05264e-46
Scd2	4.51286e-50	-0.970663	0.233	0.467	9.86285e-46
Mafg	6.23064e-50	-0.524455	0.484	0.698	1.36171e-45
Gmnn	6.46808e-50	-0.834457	0.449	0.652	1.4136e-45
Vamp8	7.25103e-50	-0.929562	0.321	0.555	1.58471e-45
Arhgap17	8.20733e-50	-0.794321	0.314	0.546	1.79371e-45
Ube2e3	9.29711e-50	-0.527761	0.623	0.818	2.03188e-45
Dnm1	1.15871e-49	-0.516797	0.551	0.741	2.53236e-45
Ggt5	1.30087e-49	-1.92491	0.052	0.272	2.84306e-45
Myl6	1.4412e-49	-0.337228	0.839	0.983	3.14975e-45
Sqle	1.5404e-49	-0.475181	0.388	0.593	3.36653e-45
Cd247	1.54463e-49	2.8837	0.224	0.063	3.3758e-45
Rap1gap2	2.09549e-49	-0.920145	0.366	0.573	4.5797e-45
Ppl	2.21357e-49	-0.46066	0.583	0.77	4.83776e-45
Enox1	2.36213e-49	-0.52636	0.499	0.688	5.16243e-45
Dzip1	2.57502e-49	3.20182	0.138	0.021	5.6277e-45
Bcas2	2.58769e-49	-0.310586	0.761	0.955	5.6554e-45
Wls	3.89128e-49	-0.565174	0.054	0.272	8.50439e-45
Eef1d	4.26173e-49	-0.435791	0.693	0.901	9.31401e-45
Psmc5	5.63917e-49	-0.377057	0.775	0.971	1.23244e-44
Gm3448	6.02458e-49	-0.913186	0.403	0.6	1.31667e-44
Rsrp1	6.69358e-49	-0.365537	0.748	0.943	1.46288e-44
Cat	7.92316e-49	-1.36345	0.188	0.413	1.73161e-44
Stk38	8.13779e-49	-0.49101	0.417	0.634	1.77851e-44
Dync1li1	8.82384e-49	-0.68251	0.548	0.738	1.92845e-44
Fus	9.14303e-49	-0.681348	0.442	0.641	1.99821e-44
Cpn1	9.30649e-49	1.64621	0.638	0.488	2.03393e-44
Ilkap	9.46497e-49	-0.467178	0.682	0.877	2.06857e-44
Rit2	1.03745e-48	-4.6139	0.01	0.203	2.26734e-44
Tc2n	1.12103e-48	-0.779098	0.268	0.506	2.45001e-44
Fbxo32	1.13269e-48	-0.525863	0.632	0.826	2.4755e-44
Rnf220	1.1561e-48	0.820907	0.796	0.914	2.52667e-44
Gsk3b	1.16608e-48	-0.362825	0.776	0.967	2.54846e-44
Cdip1	1.27047e-48	-0.345283	0.611	0.785	2.77662e-44
Cep250	2.34006e-48	-0.533168	0.424	0.642	5.11421e-44
Slc7a11	2.39965e-48	3.70973	0.133	0.02	5.24444e-44
Tpst1	2.47324e-48	1.68083	0.374	0.158	5.40527e-44
Pkia	2.57486e-48	-0.484188	0.691	0.874	5.62736e-44
Camk2n1	2.70743e-48	-0.703118	0.752	0.933	5.91708e-44
Arhgef15	2.81299e-48	5.91811	0.073	0.001	6.14778e-44
Hnrnpd	3.15784e-48	-0.417044	0.604	0.789	6.90145e-44
Rbms1	3.18641e-48	-0.428957	0.724	0.932	6.9639e-44
Ap3b2	3.41644e-48	-0.59646	0.52	0.7	7.46663e-44
Plscr2	3.44247e-48	3.92329	0.145	0.026	7.52352e-44
Fam114a2	3.92819e-48	-0.499561	0.633	0.828	8.58506e-44
Diaph2	4.2789e-48	-1.09443	0.22	0.453	9.35154e-44
Pygl	4.56267e-48	1.57747	0.367	0.152	9.97171e-44
Rangap1	5.73044e-48	-0.632672	0.619	0.809	1.25239e-43
Scaf11	6.61988e-48	-0.680902	0.534	0.733	1.44678e-43
Tspan17	6.9644e-48	-0.522627	0.544	0.724	1.52207e-43
Clcn4	8.01095e-48	-0.241306	0.669	0.86	1.75079e-43
Rab9	8.22591e-48	-0.524611	0.639	0.825	1.79777e-43
Npc2	8.53523e-48	-0.767861	0.424	0.615	1.86537e-43
Rab18	1.09147e-47	-0.402312	0.732	0.943	2.38541e-43
Gpx1	1.42005e-47	-1.23266	0.203	0.433	3.10352e-43
Kdm6b	1.54014e-47	-0.980945	0.45	0.651	3.36597e-43
Pnisr	1.69859e-47	-0.245898	0.713	0.895	3.71226e-43
Podxl	2.49564e-47	2.65575	0.306	0.111	5.45421e-43
Sec13	2.50647e-47	1.21032	0.622	0.434	5.47789e-43
Kif1a	2.72827e-47	-0.369447	0.728	0.922	5.96264e-43
Tpd52l2	2.91304e-47	-0.42157	0.754	0.955	6.36644e-43
Fam169b	3.60727e-47	2.69644	0.162	0.033	7.88369e-43
Exoc6b	3.76137e-47	-0.703354	0.464	0.655	8.22047e-43
Rufy3	4.50534e-47	-0.365399	0.782	0.973	9.84641e-43
Canx	4.61521e-47	1.51658	0.835	0.841	1.00865e-42
Evi5	4.93111e-47	-0.863126	0.429	0.63	1.07769e-42
Cpeb1	6.40052e-47	-0.435322	0.494	0.681	1.39883e-42
Chordc1	6.96196e-47	-0.996627	0.319	0.534	1.52154e-42
U2af1	1.02694e-46	-0.624636	0.564	0.749	2.24438e-42
Hspb1	1.02697e-46	1.7467	0.541	0.334	2.24444e-42
Kif5a	1.14554e-46	-0.453324	0.661	0.86	2.50357e-42
Rnaseh2b	1.2107e-46	-0.913062	0.337	0.539	2.64599e-42
Rraga	1.24759e-46	-0.48334	0.706	0.911	2.7266e-42
Pfdn2	1.27825e-46	-0.38821	0.737	0.939	2.79361e-42
Tmem134	2.03145e-46	-0.357533	0.784	0.971	4.43973e-42
Bcl11a	2.44845e-46	-0.483396	0.582	0.77	5.3511e-42
Naa20	2.46843e-46	-0.403611	0.648	0.844	5.39476e-42
Cbx4	2.49892e-46	-0.650437	0.695	0.864	5.46138e-42
Pfkp	2.71299e-46	-2.08201	0.087	0.302	5.92925e-42
Smad4	3.09746e-46	-0.593531	0.554	0.741	6.76951e-42
Ier5	3.30767e-46	-2.80259	0.047	0.25	7.22892e-42
Ppp2r2c	3.78113e-46	-0.376969	0.667	0.861	8.26365e-42
Bfsp2	4.36738e-46	-3.02867	0.093	0.306	9.54492e-42
Cuedc2	5.61269e-46	-0.513673	0.609	0.789	1.22665e-41
Ythdc1	6.10587e-46	-0.440606	0.67	0.868	1.33444e-41
Cadps	6.48144e-46	-0.567958	0.564	0.738	1.41652e-41
Rps24	7.08415e-46	-0.284957	0.913	0.994	1.54824e-41
Rpn1	7.30998e-46	1.19422	0.855	0.909	1.5976e-41
Bmp6	7.33376e-46	-0.233321	0.771	0.947	1.60279e-41
Chmp2b	9.10489e-46	-0.378157	0.688	0.883	1.98987e-41
Actn4	1.06579e-45	-0.58267	0.551	0.738	2.32929e-41
Soga3	1.09296e-45	-0.530185	0.595	0.788	2.38867e-41
Cstb	1.29934e-45	-0.521001	0.63	0.81	2.8397e-41
Dynlt1a	1.30042e-45	-0.456526	0.554	0.749	2.84207e-41
Arl2bp	1.37993e-45	-0.466421	0.519	0.702	3.01583e-41
Hdgfl3	1.49696e-45	-0.998745	0.29	0.505	3.27161e-41
Napg	1.58776e-45	-0.27041	0.739	0.918	3.47005e-41
Cox7a1	1.59816e-45	-2.10484	0.121	0.336	3.49277e-41
Rab36	1.62644e-45	-0.859781	0.383	0.581	3.55459e-41
Ip6k2	1.75712e-45	-0.614801	0.603	0.788	3.84019e-41
Uqcrh	1.95967e-45	-0.346954	0.812	0.978	4.28286e-41
Syf2	2.00548e-45	-0.321656	0.711	0.904	4.38297e-41
Mb21d2	2.05295e-45	-0.636839	0.545	0.717	4.48672e-41
Rpl26	2.05362e-45	-0.317577	0.875	0.991	4.48818e-41
N4bp2l1	2.14135e-45	-1.13065	0.229	0.446	4.67991e-41
Rpl30	2.19399e-45	-0.292675	0.901	0.99	4.79497e-41
Clmp	2.31656e-45	5.58459	0.078	0.004	5.06284e-41
Ube2d2a	2.40646e-45	-0.30916	0.697	0.888	5.25932e-41
Pcmtd2	2.40888e-45	-0.692006	0.436	0.614	5.26462e-41
Cntn1	2.79326e-45	-0.196134	0.541	0.725	6.10467e-41
5031439G07Rik	2.81235e-45	-1.01033	0.331	0.541	6.14639e-41
Ahnak2	2.87946e-45	2.36099	0.25	0.082	6.29306e-41
Chic2	2.93419e-45	-0.455813	0.672	0.865	6.41267e-41
Ifrd1	3.13362e-45	-0.97353	0.322	0.541	6.84852e-41
Fam81a	3.17442e-45	-0.672982	0.549	0.718	6.93769e-41
Wdr27	3.19781e-45	-0.699946	0.482	0.664	6.98882e-41
Cbr1	3.42472e-45	-0.480536	0.562	0.745	7.48473e-41
Kctd7	3.5487e-45	1.43205	0.576	0.358	7.75568e-41
Rbms3	3.81035e-45	-1.03051	0.247	0.466	8.32753e-41
Ankrd44	3.99905e-45	-1.06093	0.129	0.348	8.73993e-41
Rbm39	4.1483e-45	-0.364518	0.781	0.975	9.06611e-41
Csde1	4.33974e-45	-0.292222	0.675	0.864	9.48451e-41
Rps8	5.5108e-45	-0.308925	0.87	0.992	1.20439e-40
Fstl5	6.38393e-45	0.201179	0.963	0.994	1.39521e-40
Rps12	6.49402e-45	-0.330717	0.872	0.991	1.41927e-40
Tkt	7.87171e-45	-0.422321	0.532	0.72	1.72036e-40
Rab3b	8.31707e-45	1.26197	0.629	0.44	1.8177e-40
Kirrel2	9.39192e-45	-0.259383	0.61	0.862	2.0526e-40
Polr1d	9.55616e-45	-0.388537	0.751	0.953	2.0885e-40
Ddah2	1.00357e-44	-0.63962	0.522	0.726	2.19331e-40
Adgrl1	1.24906e-44	-0.266882	0.551	0.726	2.72982e-40
Rpl21	1.30192e-44	-0.292156	0.893	0.993	2.84535e-40
Hnrnpa0	1.79433e-44	-0.532501	0.586	0.78	3.92151e-40
Ralyl	2.49992e-44	-0.585539	0.339	0.561	5.46358e-40
Rragc	2.94498e-44	-0.417909	0.627	0.805	6.43625e-40
Casp6	3.03602e-44	-0.369503	0.72	0.915	6.63521e-40
Dnajb14	3.34157e-44	-0.260277	0.712	0.899	7.30299e-40
Sgtb	3.75581e-44	1.66377	0.336	0.135	8.20831e-40
Arid1a	4.01786e-44	-0.546921	0.546	0.727	8.78104e-40
Mydgf	4.06186e-44	0.989725	0.783	0.857	8.8772e-40
Bpgm	4.21956e-44	-0.407401	0.715	0.923	9.22186e-40
Fndc3b	4.82048e-44	-1.49251	0.101	0.312	1.05351e-39
Nptxr	5.69185e-44	-1.54182	0.139	0.353	1.24395e-39
Wwc1	5.69365e-44	-0.752516	0.442	0.624	1.24435e-39
Rgl2	5.95272e-44	-0.940203	0.23	0.447	1.30097e-39
Slk	5.95701e-44	-1.78613	0.099	0.304	1.3019e-39
Slc35f3	7.73286e-44	4.26478	0.076	0.004	1.69002e-39
Srsf3	7.86987e-44	-0.356637	0.761	0.949	1.71996e-39
Kctd8	7.88378e-44	-3.63783	0.021	0.204	1.723e-39
Leprot	8.30135e-44	-0.321594	0.637	0.825	1.81426e-39
Phactr3	8.61493e-44	-2.21156	0.069	0.271	1.88279e-39
Pim1	8.93127e-44	-0.774312	0.399	0.6	1.95193e-39
Gpi1	8.98719e-44	0.478748	0.832	0.97	1.96415e-39
Sv2c	9.72869e-44	-0.209849	0.597	0.786	2.12621e-39
Myof	1.0134e-43	-4.54415	0.016	0.193	2.21478e-39
Paics	1.08881e-43	-0.365321	0.653	0.84	2.3796e-39
Lamtor3	1.10339e-43	-0.364159	0.676	0.847	2.41145e-39
Klhl8	1.41074e-43	-1.06744	0.32	0.516	3.08317e-39
Fuom	1.50666e-43	-1.57797	0.092	0.3	3.2928e-39
Ggact	1.52637e-43	-0.69882	0.267	0.484	3.33587e-39
H2-M10.1	1.6101e-43	8.60484	0.115	0.01	3.51887e-39
Dnajc8	1.61778e-43	-0.428856	0.646	0.827	3.53565e-39
Prpf4b	1.68703e-43	-0.258625	0.724	0.921	3.687e-39
Fubp1	1.82089e-43	-0.310582	0.603	0.784	3.97955e-39
Hivep3	1.86219e-43	-0.484866	0.478	0.671	4.06982e-39
Parvb	2.07032e-43	-2.75196	0.026	0.208	4.52469e-39
Acadm	2.37805e-43	-0.69427	0.491	0.671	5.19724e-39
1700123O20Rik	2.41736e-43	-0.431518	0.668	0.861	5.28313e-39
Pithd1	2.96384e-43	-0.762787	0.439	0.627	6.47748e-39
Tpm1	2.99685e-43	-0.436887	0.692	0.875	6.54961e-39
Zranb1	3.08116e-43	-0.607463	0.578	0.746	6.73388e-39
Ddost	4.28142e-43	1.04501	0.839	0.922	9.35703e-39
Mtfr1l	4.47178e-43	-0.544029	0.651	0.844	9.77307e-39
Agap1	4.91743e-43	-0.287607	0.739	0.924	1.0747e-38
Sec16b	5.06241e-43	2.53238	0.172	0.041	1.10639e-38
Epb41l3	5.07554e-43	-0.627889	0.477	0.658	1.10926e-38
Dmtn	5.96199e-43	-0.388517	0.615	0.791	1.30299e-38
Stard5	5.96287e-43	1.79915	0.325	0.133	1.30318e-38
Kcnh6	6.054e-43	-0.774579	0.312	0.515	1.3231e-38
Dab2ip	6.57686e-43	-0.394022	0.709	0.894	1.43737e-38
Pdzrn3	6.60927e-43	3.0363	0.141	0.028	1.44445e-38
Efnb1	6.72776e-43	1.76953	0.142	0.028	1.47035e-38
Sox4	7.52605e-43	-0.946177	0.381	0.578	1.64482e-38
Mapre2	8.53906e-43	-0.255022	0.698	0.887	1.86621e-38
Nudt3	8.71205e-43	-0.674962	0.488	0.675	1.90402e-38
Akirin1	8.80448e-43	-0.381199	0.679	0.878	1.92422e-38
Hmgn2	9.08124e-43	-0.623662	0.517	0.691	1.9847e-38
Tsn	1.12462e-42	-0.351604	0.689	0.877	2.45786e-38
Dync1i2	1.1414e-42	-0.346983	0.785	0.973	2.49452e-38
Spef2	1.15359e-42	-0.465906	0.56	0.738	2.52116e-38
Sdc2	1.18075e-42	-0.101004	0.712	0.891	2.58054e-38
Pak7	1.18776e-42	-0.409635	0.367	0.567	2.59585e-38
Ppp2r5b	1.32495e-42	-0.795661	0.446	0.628	2.89568e-38
Ptdss2	1.48407e-42	-0.416969	0.662	0.83	3.24343e-38
Thop1	1.56422e-42	-0.630413	0.517	0.698	3.41861e-38
Mtx2	1.64441e-42	-0.469277	0.591	0.781	3.59385e-38
Ppargc1a	1.68817e-42	-1.74289	0.084	0.286	3.68949e-38
Kcnma1	1.81645e-42	-0.25007	0.59	0.768	3.96984e-38
Gsr	1.87305e-42	-0.556476	0.567	0.762	4.09355e-38
Ttll6	1.98744e-42	-0.285323	0.578	0.763	4.34355e-38
Pcdh10	2.14983e-42	-1.43064	0.251	0.47	4.69845e-38
Gatad2a	2.22087e-42	-0.48154	0.625	0.806	4.85372e-38
Etl4	2.54203e-42	-1.26797	0.219	0.419	5.5556e-38
Edem1	2.66413e-42	1.93823	0.497	0.288	5.82246e-38
1110004F10Rik	2.72228e-42	-0.34251	0.735	0.937	5.94954e-38
Palm	2.80648e-42	-0.254042	0.709	0.904	6.13356e-38
Ndufs8	2.89625e-42	-0.379772	0.673	0.862	6.32976e-38
Ostc	3.16974e-42	1.10323	0.767	0.809	6.92746e-38
Fam98c	3.17407e-42	-0.700235	0.559	0.734	6.93693e-38
Macf1	3.37858e-42	-0.395219	0.691	0.867	7.38389e-38
Rpl38	3.4691e-42	-0.257598	0.912	0.993	7.58173e-38
Ptpmt1	3.58396e-42	-0.409047	0.682	0.874	7.83275e-38
Ppp1ca	3.83704e-42	-0.392146	0.746	0.957	8.38584e-38
Snapin	4.04719e-42	-0.513472	0.546	0.715	8.84514e-38
Ube2g1	4.90947e-42	-0.455584	0.659	0.859	1.07296e-37
1500009C09Rik	5.48955e-42	5.82524	0.061	0.001	1.19974e-37
Mapk4	5.55202e-42	-1.26307	0.224	0.431	1.21339e-37
Ar	5.63291e-42	3.62256	0.098	0.012	1.23107e-37
Atp5h	5.66891e-42	-0.338294	0.826	0.984	1.23894e-37
Ccdc39	6.23428e-42	-0.88181	0.295	0.496	1.3625e-37
Prrg2	6.88828e-42	-0.854435	0.351	0.546	1.50543e-37
Exoc6	7.33955e-42	-0.952423	0.34	0.533	1.60406e-37
Actr1b	9.20637e-42	-0.355888	0.756	0.941	2.01205e-37
Surf1	9.34108e-42	-0.573207	0.556	0.734	2.04149e-37
Pafah1b1	9.34268e-42	-0.341658	0.8	0.98	2.04184e-37
Ubald2	1.03111e-41	-0.447697	0.524	0.706	2.25349e-37
Zbtb20	1.1506e-41	-0.624936	0.389	0.582	2.51464e-37
Epn2	1.19361e-41	-0.627361	0.43	0.616	2.60864e-37
Twf1	1.20973e-41	-0.531484	0.644	0.824	2.64387e-37
Itm2c	1.33092e-41	-0.158045	0.621	0.79	2.90873e-37
Ppp2r2a	1.33696e-41	-0.500185	0.59	0.789	2.92192e-37
Actl6b	1.36059e-41	-1.14891	0.283	0.492	2.97357e-37
H2-D1	1.4028e-41	-0.336735	0.564	0.729	3.06581e-37
Tex261	1.577e-41	-0.37266	0.507	0.68	3.44654e-37
Triqk	2.12035e-41	-0.407668	0.613	0.806	4.63402e-37
Rnf6	2.30019e-41	-0.341786	0.655	0.836	5.02707e-37
Zfp365	2.8078e-41	2.21435	0.229	0.075	6.13646e-37
Usp15	2.85517e-41	-0.859042	0.405	0.6	6.23997e-37
Ephx1	3.11484e-41	1.97427	0.489	0.273	6.80749e-37
Cntn4	3.66282e-41	0.784525	0.918	0.985	8.0051e-37
Acat2	3.76497e-41	-1.60492	0.151	0.355	8.22833e-37
Zfand5	3.97573e-41	-0.534159	0.582	0.726	8.68897e-37
Tsc22d4	4.06958e-41	-0.565755	0.524	0.703	8.89407e-37
Iqck	4.09879e-41	-1.49351	0.192	0.396	8.95792e-37
Emg1	4.46448e-41	-0.436257	0.625	0.797	9.75712e-37
Slc3a2	4.67495e-41	1.13564	0.82	0.886	1.02171e-36
Dgkg	4.90804e-41	2.10882	0.198	0.056	1.07265e-36
Pfdn1	4.9448e-41	-0.356691	0.699	0.904	1.08069e-36
Acbd6	5.07415e-41	-0.416801	0.677	0.85	1.10895e-36
Abo	5.30705e-41	1.40662	0.7	0.602	1.15986e-36
Vgll4	5.40153e-41	-0.677566	0.44	0.629	1.1805e-36
Ptprs	5.54639e-41	-0.103503	0.629	0.811	1.21216e-36
Gm3417	5.65611e-41	1.35897	0.285	0.107	1.23614e-36
Pafah1b3	6.00669e-41	-0.393401	0.757	0.954	1.31276e-36
Mef2a	6.98077e-41	-0.396175	0.642	0.824	1.52565e-36
Ptov1	7.29653e-41	-0.400296	0.702	0.892	1.59466e-36
Snx16	7.38555e-41	-0.617117	0.505	0.69	1.61411e-36
Tubb4a	7.67642e-41	-2.77329	0.055	0.241	1.67768e-36
Tmcc1	7.88707e-41	-0.502623	0.531	0.713	1.72372e-36
Myt1l	8.77249e-41	-0.274764	0.73	0.914	1.91723e-36
Map2k2	9.13552e-41	-0.413185	0.723	0.926	1.99657e-36
Phlda3	9.31198e-41	1.66186	0.202	0.06	2.03513e-36
Rack1	1.39152e-40	-0.392315	0.764	0.962	3.04116e-36
Ltv1	1.47158e-40	-0.742551	0.351	0.537	3.21614e-36
Frmpd3	1.57761e-40	-0.749066	0.18	0.404	3.44786e-36
Ctr9	1.70235e-40	-0.770147	0.458	0.637	3.7205e-36
Polr2k	1.77639e-40	-0.346047	0.747	0.941	3.88231e-36
Tanc1	2.32832e-40	-1.45606	0.148	0.35	5.08853e-36
Ssb	2.44285e-40	0.514289	0.789	0.955	5.33884e-36
Jtb	2.45843e-40	-0.389267	0.682	0.869	5.37291e-36
Gpd1l	2.58292e-40	-0.857023	0.316	0.509	5.64498e-36
Trappc3	3.03464e-40	-0.36383	0.675	0.868	6.6322e-36
Eef2	3.22508e-40	-0.344363	0.796	0.977	7.04841e-36
Zranb2	3.2478e-40	-0.35397	0.731	0.927	7.09808e-36
Nfkbia	3.26656e-40	-1.07202	0.352	0.535	7.13907e-36
Rpl13	3.56445e-40	-0.261902	0.909	0.993	7.7901e-36
Gabarapl2	3.91632e-40	-0.330096	0.817	0.98	8.55911e-36
Mrps5	3.98085e-40	-0.241682	0.566	0.742	8.70016e-36
Arf5	4.09749e-40	-0.312245	0.775	0.97	8.95506e-36
Slc25a5	4.14066e-40	-0.314873	0.779	0.961	9.04941e-36
Cdipt	5.00922e-40	-0.123682	0.704	0.881	1.09477e-35
Mthfd2	5.40033e-40	-0.397728	0.587	0.771	1.18024e-35
Sumo1	5.89888e-40	-0.316682	0.749	0.95	1.2892e-35
Stmn2	5.92368e-40	-0.554881	0.64	0.825	1.29462e-35
Add1	6.26533e-40	-0.381583	0.621	0.799	1.36929e-35
Fbxo9	6.74057e-40	-0.446143	0.617	0.801	1.47315e-35
Armc1	7.08094e-40	-0.452272	0.631	0.819	1.54754e-35
Tmem94	7.31269e-40	-0.359831	0.582	0.761	1.59819e-35
Neu1	7.57084e-40	-0.203926	0.672	0.846	1.65461e-35
Tprgl	9.47401e-40	-0.330878	0.798	0.98	2.07054e-35
Atad1	9.83419e-40	-0.56648	0.404	0.58	2.14926e-35
Dazap2	1.01831e-39	-0.437194	0.636	0.811	2.22552e-35
Pcsk2	1.08652e-39	-2.4153	0.06	0.249	2.37459e-35
Ptp4a3	1.09568e-39	0.429698	0.802	0.965	2.39461e-35
Spag9	1.64875e-39	-0.268058	0.578	0.75	3.60334e-35
9330182L06Rik	2.35763e-39	-0.625367	0.283	0.482	5.15261e-35
Spred1	2.60861e-39	-1.20388	0.068	0.26	5.70112e-35
Snx6	2.80946e-39	-0.64059	0.484	0.663	6.14008e-35
Arl4a	2.86876e-39	-0.454971	0.55	0.736	6.26966e-35
Top1	2.88297e-39	-0.294614	0.728	0.928	6.30073e-35
Sfpq	2.95835e-39	-0.353323	0.691	0.88	6.46548e-35
Ywhae	2.99875e-39	-0.306837	0.824	0.982	6.55377e-35
Gpatch8	3.07887e-39	-0.236765	0.592	0.77	6.72887e-35
Gin1	3.14279e-39	-0.897969	0.427	0.596	6.86857e-35
Arl8a	3.3725e-39	-0.273748	0.694	0.879	7.37061e-35
Golim4	3.62942e-39	1.51639	0.675	0.536	7.9321e-35
Rgs20	3.67501e-39	-0.431153	0.671	0.866	8.03172e-35
Thumpd1	3.75037e-39	-0.972342	0.377	0.557	8.19644e-35
Smc1a	3.86281e-39	-0.628184	0.502	0.668	8.44218e-35
Kcnn2	4.59841e-39	-3.24705	0.03	0.201	1.00498e-34
Egln1	4.65363e-39	-0.340339	0.637	0.807	1.01705e-34
Zfp207	5.45171e-39	-0.566963	0.517	0.703	1.19147e-34
Eif3h	7.60844e-39	-0.348028	0.782	0.97	1.66282e-34
Rps3a1	7.97505e-39	-0.30493	0.865	0.99	1.74295e-34
Ube2o	1.04363e-38	-0.472306	0.577	0.743	2.28086e-34
Lbh	1.05701e-38	-2.15025	0.102	0.297	2.31009e-34
Arpc1a	1.12739e-38	-0.341488	0.742	0.944	2.46392e-34
Hnrnph3	1.1865e-38	-0.548967	0.517	0.7	2.5931e-34
Phax	1.19524e-38	-0.362642	0.679	0.871	2.61219e-34
Ormdl3	1.23447e-38	-1.10214	0.227	0.423	2.69794e-34
Ccdc126	1.26229e-38	-0.739761	0.293	0.484	2.75874e-34
Kiz	1.30188e-38	-0.42988	0.53	0.702	2.84525e-34
Nsmf	1.3906e-38	-0.690314	0.415	0.597	3.03916e-34
Rab3c	1.4213e-38	2.75007	0.493	0.349	3.10625e-34
Asphd2	1.56133e-38	2.62456	0.115	0.019	3.41228e-34
Mia3	1.56513e-38	0.911478	0.926	0.984	3.42058e-34
Marc2	1.6197e-38	0.678021	0.827	0.935	3.53986e-34
Crtc3	1.67419e-38	-0.396168	0.486	0.671	3.65893e-34
Flywch2	1.68121e-38	-0.694733	0.43	0.597	3.67427e-34
Sf3b1	1.73208e-38	-0.358522	0.691	0.87	3.78547e-34
Myo1e	1.84571e-38	-0.332019	0.582	0.761	4.03379e-34
Sdhaf3	1.91281e-38	-0.80085	0.4	0.576	4.18044e-34
Syt11	1.93251e-38	-0.146569	0.878	0.987	4.22349e-34
Pam16	2.09939e-38	-0.348861	0.727	0.93	4.58821e-34
Mitf	2.12213e-38	-3.2353	0.029	0.197	4.63791e-34
Mast4	2.16532e-38	-0.927847	0.272	0.467	4.7323e-34
Grip1	2.28042e-38	-0.207318	0.662	0.811	4.98385e-34
Nbea	2.39941e-38	-0.196086	0.629	0.802	5.24391e-34
Tgfb1	2.64419e-38	2.21947	0.162	0.04	5.77888e-34
Hnrnpu	2.86186e-38	-0.28896	0.682	0.859	6.25459e-34
Hspa4	2.98519e-38	-0.315523	0.615	0.794	6.52412e-34
Rab27b	3.10853e-38	4.1231	0.087	0.009	6.79369e-34
Kcnab2	3.15972e-38	-1.60289	0.136	0.33	6.90557e-34
Cfl1	3.18247e-38	-0.351547	0.787	0.974	6.9553e-34
Ell3	3.34799e-38	-0.620776	0.49	0.657	7.31704e-34
Hnrnpdl	3.38463e-38	-0.363199	0.752	0.937	7.39711e-34
Rev3l	3.49956e-38	-0.501487	0.402	0.576	7.6483e-34
Zbtb7a	3.54502e-38	-0.373597	0.684	0.863	7.74764e-34
Pcbp3	3.56193e-38	-1.27262	0.193	0.389	7.78459e-34
Snx21	3.98745e-38	-1.15756	0.296	0.479	8.71456e-34
Acadl	4.8522e-38	-3.12786	0.034	0.202	1.06045e-33
Pcnp	4.92699e-38	-0.430628	0.604	0.764	1.07679e-33
Baz2b	5.22579e-38	-0.33122	0.705	0.897	1.1421e-33
Phactr1	5.64366e-38	-0.273577	0.788	0.974	1.23342e-33
Cacna1h	5.74209e-38	-0.250895	0.486	0.648	1.25493e-33
Cbll1	6.02876e-38	-0.776731	0.388	0.567	1.31759e-33
Mkrn1	6.10792e-38	-0.411538	0.576	0.74	1.33489e-33
Eif4g3	6.11549e-38	-0.294229	0.492	0.667	1.33654e-33
Csmd1	6.60517e-38	-5.14029	0.009	0.162	1.44356e-33
Spen	7.12339e-38	-0.904879	0.367	0.546	1.55682e-33
Klf6	7.92286e-38	-0.620765	0.394	0.596	1.73154e-33
Ube2e1	8.2716e-38	-0.338277	0.752	0.956	1.80776e-33
Rpl10a	8.79479e-38	-0.351305	0.81	0.982	1.9221e-33
Commd1	9.95677e-38	-0.391343	0.76	0.942	2.17605e-33
Golph3	1.00606e-37	-0.438235	0.464	0.639	2.19875e-33
Pla2g12a	1.03949e-37	0.601343	0.795	0.943	2.27181e-33
Epb41	1.04104e-37	1.46097	0.336	0.148	2.27519e-33
Ttc39a	1.17291e-37	-2.05876	0.078	0.259	2.5634e-33
Fam193b	1.19004e-37	-0.337882	0.585	0.758	2.60083e-33
Rtn4rl1	1.24483e-37	-0.237824	0.505	0.681	2.72057e-33
Tub	1.27868e-37	-1.0407	0.255	0.451	2.79455e-33
Efnb3	1.35432e-37	3.71522	0.126	0.025	2.95987e-33
Tmcc3	1.5817e-37	-0.63139	0.405	0.59	3.45681e-33
Xpa	1.69328e-37	-0.532185	0.538	0.706	3.70065e-33
Ss18	1.7113e-37	-0.926374	0.363	0.538	3.74004e-33
Maz	1.77605e-37	-0.881791	0.459	0.628	3.88157e-33
Vmn2r42	1.7916e-37	10.32	0.084	0.006	3.91555e-33
Cnn3	1.81273e-37	-1.16686	0.251	0.441	3.96172e-33
Lamtor2	1.93899e-37	0.454911	0.801	0.96	4.23767e-33
Cmtm4	2.02889e-37	1.03762	0.769	0.789	4.43414e-33
Dhrs1	2.04427e-37	-0.370527	0.551	0.735	4.46776e-33
Atp2b4	2.06762e-37	-0.359989	0.334	0.525	4.51878e-33
9530068E07Rik	2.072e-37	0.146635	0.548	0.731	4.52836e-33
Mtpn	2.23449e-37	-0.320763	0.662	0.858	4.88349e-33
Wnk1	2.3538e-37	-0.227998	0.741	0.911	5.14423e-33
H4c9	2.39457e-37	1.68327	0.294	0.123	5.23333e-33
Foxo6	2.43356e-37	-0.711118	0.442	0.618	5.31855e-33
Mbl2	2.46322e-37	-1.07109	0.215	0.438	5.38337e-33
Prkar1a	2.49138e-37	-0.336529	0.748	0.939	5.44491e-33
Tmem38b	2.69347e-37	1.36382	0.501	0.291	5.88658e-33
Nlgn3	2.69891e-37	-1.09342	0.052	0.228	5.89846e-33
Dsp	2.73311e-37	1.43879	0.288	0.114	5.97321e-33
Cab39	2.9698e-37	-0.566066	0.477	0.653	6.49049e-33
Rpl27a	3.02282e-37	0.200971	0.924	0.995	6.60637e-33
Hyou1	3.63011e-37	1.73945	0.602	0.424	7.9336e-33
Rtkn	3.68431e-37	-2.2336	0.047	0.221	8.05205e-33
Cenpb	3.94418e-37	-0.381077	0.657	0.842	8.62001e-33
Irf9	4.11133e-37	-1.33205	0.232	0.422	8.98531e-33
Fgd2	4.92197e-37	-2.68236	0.065	0.24	1.0757e-32
Magt1	5.36569e-37	1.60274	0.577	0.37	1.17267e-32
Slc38a1	5.47551e-37	1.10878	0.716	0.646	1.19667e-32
Cnbp	5.63352e-37	-0.34224	0.725	0.926	1.23121e-32
Tmem106c	5.6459e-37	-0.33231	0.561	0.735	1.23391e-32
Cby1	6.00643e-37	-0.405049	0.601	0.778	1.3127e-32
Cpm	6.05165e-37	-0.225893	0.523	0.696	1.32259e-32
2210016L21Rik	6.70415e-37	-0.356716	0.74	0.944	1.46519e-32
Ndufa12	7.11853e-37	-0.319082	0.75	0.948	1.55575e-32
Mrpl52	8.23058e-37	-0.330604	0.748	0.936	1.79879e-32
Odf2	8.86145e-37	-0.368313	0.561	0.734	1.93667e-32
Cers4	1.05789e-36	-3.37699	0.034	0.196	2.31202e-32
Zcrb1	1.06732e-36	-0.33852	0.729	0.935	2.33263e-32
Edem2	1.42829e-36	1.55244	0.571	0.385	3.12152e-32
Cacnb4	1.44772e-36	1.55467	0.393	0.203	3.16399e-32
Inpp4a	1.54751e-36	-0.505254	0.433	0.614	3.38208e-32
Rnd2	1.55515e-36	1.2584	0.517	0.317	3.39878e-32
Vmn2r22	1.58972e-36	10.3809	0.053	0.001	3.47433e-32
Fads6	1.90046e-36	-1.44991	0.087	0.269	4.15346e-32
Apba2	1.92054e-36	-0.70295	0.392	0.563	4.19735e-32
Pmm1	1.95266e-36	-0.377483	0.696	0.893	4.26753e-32
Tomm22	2.00712e-36	-0.306226	0.745	0.945	4.38655e-32
Rassf3	2.4172e-36	-1.04538	0.275	0.464	5.28279e-32
Cic	2.4233e-36	-0.966764	0.331	0.505	5.29612e-32
Wac	2.42618e-36	-0.431364	0.602	0.756	5.30241e-32
Ankrd29	2.54898e-36	-2.65662	0.011	0.161	5.57079e-32
Zbtb4	2.71273e-36	-0.614933	0.391	0.566	5.92866e-32
Slc25a27	2.86499e-36	-0.762655	0.336	0.523	6.26145e-32
Ogdh	3.07916e-36	-0.537005	0.51	0.666	6.72951e-32
Ppp1r14b	3.47432e-36	-0.454098	0.723	0.9	7.59312e-32
Chd4	3.50912e-36	-0.354668	0.717	0.891	7.66917e-32
Kdm5b	3.54671e-36	-0.44742	0.497	0.658	7.75133e-32
Ift172	4.23381e-36	1.86912	0.487	0.314	9.25299e-32
Dnmt3a	4.44816e-36	-0.526261	0.42	0.602	9.72145e-32
Syn1	4.85171e-36	-0.441259	0.566	0.735	1.06034e-31
Med8	5.0402e-36	-0.323497	0.627	0.794	1.10154e-31
Pts	5.0764e-36	-0.576401	0.488	0.645	1.10945e-31
Stmn3	5.9016e-36	-0.265402	0.857	0.986	1.28979e-31
Ndp	5.9166e-36	-0.61697	0.381	0.57	1.29307e-31
Suz12	6.13217e-36	-0.64154	0.526	0.694	1.34019e-31
Mtcl1	6.61034e-36	-0.769806	0.361	0.546	1.44469e-31
Mvk	7.61081e-36	-0.434641	0.576	0.754	1.66334e-31
Twistnb	7.67929e-36	-0.793598	0.404	0.571	1.67831e-31
Hdac11	7.68222e-36	-0.338373	0.614	0.794	1.67895e-31
Irs2	9.71508e-36	-0.642111	0.379	0.557	2.12323e-31
Fgf12	1.04214e-35	-0.340117	0.783	0.969	2.27759e-31
Clic6	1.12734e-35	-0.414318	0.596	0.77	2.4638e-31
Dok4	1.1696e-35	-0.444769	0.508	0.675	2.55616e-31
Pde1a	1.21501e-35	-3.32579	0.034	0.193	2.6554e-31
Dmxl2	1.24365e-35	-0.835598	0.255	0.444	2.718e-31
Pnmal1	1.28175e-35	-0.386942	0.453	0.656	2.80127e-31
Vcl	1.29024e-35	-1.30835	0.184	0.373	2.81983e-31
H2bc6	1.32312e-35	1.62215	0.32	0.145	2.89167e-31
Ugdh	1.39141e-35	-3.29685	0.028	0.185	3.04093e-31
Tmem151b	1.49195e-35	-0.791362	0.275	0.465	3.26066e-31
Echs1	1.644e-35	-0.522959	0.482	0.647	3.59296e-31
Snx24	1.67694e-35	-3.85975	0.019	0.17	3.66496e-31
Hs3st6	1.70106e-35	1.61562	0.334	0.151	3.71766e-31
Pmvk	1.77076e-35	-0.519439	0.42	0.587	3.87001e-31
mt-Nd1	1.80836e-35	0.705277	0.961	0.992	3.95216e-31
Zkscan3	1.8442e-35	-0.83786	0.323	0.497	4.03049e-31
Coprs	2.16156e-35	-0.423366	0.45	0.621	4.72408e-31
Slc15a4	2.18822e-35	1.74886	0.326	0.146	4.78237e-31
Ccdc170	2.30285e-35	-0.77703	0.452	0.615	5.03287e-31
Bicdl2	2.60815e-35	-0.775132	0.366	0.549	5.70012e-31
Mier1	2.68009e-35	-0.600401	0.45	0.615	5.85734e-31
Celf2	2.87585e-35	-2.65494	0.049	0.215	6.28517e-31
Krt72	3.01047e-35	1.33758	0.446	0.258	6.57938e-31
Tmem60	3.11513e-35	-0.484306	0.531	0.698	6.80812e-31
Cebpg	3.31257e-35	-0.297953	0.724	0.921	7.23963e-31
Ppm1b	3.60582e-35	-0.368465	0.446	0.622	7.88051e-31
Rbbp4	3.77432e-35	-0.404702	0.6	0.768	8.24877e-31
Rtn2	4.04572e-35	-0.663602	0.411	0.574	8.84192e-31
Actb	4.13291e-35	-0.36538	0.854	0.99	9.03248e-31
Rasip1	4.27615e-35	-0.467459	0.369	0.561	9.34553e-31
Lsm6	4.2834e-35	-0.317178	0.71	0.899	9.36138e-31
Coq10b	4.32053e-35	-0.539992	0.421	0.58	9.44252e-31
Polr2j	4.42526e-35	-0.320558	0.721	0.916	9.67141e-31
Pum1	4.45444e-35	-0.575691	0.523	0.674	9.73518e-31
Jph4	4.52558e-35	-3.22126	0.024	0.177	9.89065e-31
Ccdc47	4.57208e-35	-0.621151	0.191	0.375	9.99229e-31
Med19	4.59405e-35	-0.579417	0.489	0.651	1.00403e-30
Magi1	4.66006e-35	-0.920978	0.279	0.456	1.01846e-30
Wdr83os	4.74722e-35	-0.31467	0.724	0.906	1.03751e-30
Peg3	4.86698e-35	-0.914543	0.298	0.482	1.06368e-30
B3gat3	4.95705e-35	-0.483831	0.637	0.812	1.08336e-30
Acat1	5.02315e-35	-0.650966	0.502	0.663	1.09781e-30
Tmem70	5.14196e-35	-0.330315	0.657	0.827	1.12378e-30
Srsf9	6.06865e-35	0.700328	0.769	0.888	1.3263e-30
Serpinb1a	6.45482e-35	3.7361	0.091	0.013	1.4107e-30
Jmjd1c	6.55311e-35	-0.61061	0.343	0.525	1.43218e-30
Vmn2r5	6.65152e-35	8.15345	0.06	0.003	1.45369e-30
Saxo2	7.24664e-35	-0.702781	0.478	0.641	1.58375e-30
Ctbp1	7.38089e-35	-0.426061	0.653	0.836	1.61309e-30
Ccnh	8.22023e-35	-0.358315	0.596	0.76	1.79653e-30
Maff	8.56266e-35	-2.27188	0.075	0.247	1.87137e-30
Sh3bgrl	8.63217e-35	-0.339038	0.808	0.98	1.88656e-30
Snw1	9.04309e-35	-0.274822	0.681	0.855	1.97637e-30
Pfn1	1.22729e-34	-0.300943	0.764	0.958	2.68224e-30
Ubxn11	1.34709e-34	-0.508697	0.244	0.434	2.94407e-30
Gm5617	1.41398e-34	1.12522	0.666	0.56	3.09026e-30
H4c6	1.4312e-34	3.93922	0.061	0.003	3.12788e-30
Selenot	1.54817e-34	0.512436	0.842	0.961	3.38352e-30
Tra2a	1.61934e-34	-0.287443	0.593	0.773	3.53907e-30
Ppp2r3a	1.7858e-34	-0.711469	0.426	0.59	3.90286e-30
Nt5c	1.7942e-34	-0.436529	0.46	0.632	3.92122e-30
U2surp	1.8736e-34	-0.267533	0.616	0.789	4.09476e-30
Snap91	1.98375e-34	-0.418372	0.442	0.608	4.33548e-30
Fopnl	1.98523e-34	-0.467407	0.464	0.651	4.33873e-30
Syap1	2.00146e-34	-0.482543	0.506	0.684	4.37419e-30
Sdhaf4	2.01246e-34	-0.326233	0.74	0.947	4.39823e-30
F11r	2.24127e-34	-0.134899	0.532	0.711	4.89829e-30
Dlgap3	2.31356e-34	-0.706784	0.36	0.536	5.05628e-30
Fau	2.38815e-34	-0.245265	0.916	0.993	5.21929e-30
Mpv17	2.43166e-34	-0.515819	0.434	0.598	5.31438e-30
Pwwp2b	2.48709e-34	-1.12333	0.117	0.297	5.43553e-30
Bcl11b	2.59467e-34	-0.419361	0.52	0.675	5.67066e-30
Tmem91	2.63515e-34	2.06966	0.166	0.047	5.75912e-30
Nme5	2.66307e-34	-0.900951	0.266	0.443	5.82015e-30
Rplp0	2.82124e-34	0.292012	0.815	0.981	6.16581e-30
Adam23	2.88522e-34	1.82584	0.355	0.171	6.30565e-30
Pon3	2.8949e-34	-0.936442	0.107	0.285	6.3268e-30
Atp5a1	3.30125e-34	-0.250041	0.771	0.959	7.21488e-30
Rab21	3.33799e-34	-0.381378	0.698	0.886	7.29518e-30
Abhd8	3.37745e-34	-0.847693	0.404	0.57	7.38142e-30
Ubn1	3.53008e-34	-0.324452	0.587	0.755	7.71499e-30
Metap2	3.58073e-34	-0.291144	0.706	0.903	7.82569e-30
Dusp11	3.79092e-34	-0.275621	0.553	0.711	8.28506e-30
Gas8	3.92434e-34	-0.838322	0.367	0.545	8.57664e-30
Tmem65	4.43135e-34	1.14429	0.585	0.422	9.6847e-30
A730046J19Rik	4.61047e-34	-2.69474	0.014	0.158	1.00762e-29
Zc3h13	4.79467e-34	-0.455063	0.535	0.717	1.04787e-29
Ppm1a	4.9521e-34	-0.331746	0.712	0.922	1.08228e-29
Lin7c	5.20872e-34	-0.481286	0.529	0.698	1.13837e-29
Pfkl	5.37551e-34	-0.511488	0.211	0.397	1.17482e-29
Ckap5	5.37582e-34	-0.379138	0.631	0.798	1.17489e-29
Yy1	5.38253e-34	-0.306405	0.596	0.768	1.17635e-29
Klc2	5.66455e-34	-0.392687	0.578	0.735	1.23799e-29
Myl12b	5.70541e-34	-0.290467	0.735	0.927	1.24692e-29
Rps27a	5.81977e-34	-0.25199	0.893	0.993	1.27191e-29
Gamt	5.82569e-34	1.2305	0.59	0.429	1.27321e-29
Hcn1	6.17748e-34	-1.41231	0.117	0.299	1.35009e-29
Itgb1	6.38164e-34	-0.205902	0.417	0.598	1.39471e-29
Actn1	7.7977e-34	-0.738785	0.303	0.482	1.70419e-29
C530008M17Rik	8.08026e-34	-0.432144	0.558	0.717	1.76594e-29
mt-Nd4l	8.68042e-34	1.05746	0.811	0.858	1.89711e-29
Cacng5	8.74281e-34	2.159	0.27	0.112	1.91074e-29
Dnajb9	8.84356e-34	1.22456	0.774	0.814	1.93276e-29
Npnt	9.11584e-34	2.88158	0.081	0.01	1.99227e-29
Ubl7	9.40509e-34	-0.442824	0.589	0.751	2.05548e-29
Irak1bp1	9.68502e-34	-0.449589	0.573	0.724	2.11666e-29
Ncoa7	1.04758e-33	-0.317125	0.726	0.923	2.28949e-29
Snf8	1.11283e-33	-0.412976	0.667	0.84	2.43209e-29
Aip	1.12664e-33	-0.39965	0.543	0.702	2.46226e-29
Coro6	1.13541e-33	-1.54699	0.175	0.358	2.48143e-29
Tuba1b	1.21048e-33	-0.643925	0.462	0.618	2.6455e-29
Hlcs	1.22792e-33	-0.472457	0.506	0.673	2.68363e-29
Syt16	1.2655e-33	-2.07874	0.03	0.183	2.76575e-29
Sri	1.39039e-33	-0.267784	0.722	0.913	3.03869e-29
Mat2a	1.47501e-33	-0.490361	0.495	0.652	3.22363e-29
Hnrnph1	1.47834e-33	-0.308053	0.643	0.808	3.2309e-29
Map4	1.53414e-33	-1.44677	0.074	0.245	3.35287e-29
Gap43	1.57984e-33	-0.829778	0.392	0.594	3.45273e-29
Bri3	1.67368e-33	-0.312788	0.748	0.951	3.65783e-29
Rps5	1.67745e-33	-0.284312	0.865	0.988	3.66607e-29
Kif3c	1.88732e-33	-0.32775	0.567	0.717	4.12473e-29
Crabp1	1.98594e-33	-1.17518	0.045	0.208	4.34028e-29
Ccdc25	2.02902e-33	-0.42414	0.528	0.698	4.43442e-29
Iqgap1	2.25213e-33	-0.295236	0.686	0.854	4.92202e-29
Derl3	2.34837e-33	6.08283	0.05	0.001	5.13237e-29
Nosip	2.36571e-33	-0.70551	0.351	0.518	5.17026e-29
Sdhb	2.77587e-33	-0.20393	0.741	0.938	6.06667e-29
Rhoa	2.80081e-33	-0.246292	0.77	0.953	6.12116e-29
Fam98b	3.21249e-33	-0.310045	0.509	0.668	7.0209e-29
Cdc42se2	3.45937e-33	-0.450486	0.536	0.689	7.56046e-29
Stk40	3.91894e-33	-0.713569	0.379	0.551	8.56484e-29
Rtn1	3.97515e-33	-0.234132	0.812	0.98	8.68769e-29
Rpl34	4.02974e-33	-0.27735	0.864	0.989	8.80701e-29
Pbx2	4.13217e-33	1.27569	0.405	0.213	9.03087e-29
Hivep1	4.13755e-33	-0.35467	0.448	0.615	9.04262e-29
Osbpl3	4.1927e-33	-1.01784	0.203	0.386	9.16314e-29
Eif4a2	4.21645e-33	-0.276341	0.774	0.954	9.21506e-29
Cdh22	4.26926e-33	2.37681	0.118	0.025	9.33047e-29
Dnajb2	4.34883e-33	-0.325049	0.637	0.816	9.50437e-29
Socs3	4.76383e-33	-0.922233	0.367	0.552	1.04114e-28
Bcl7b	4.85227e-33	-0.442312	0.614	0.767	1.06046e-28
Mpp2	5.02262e-33	-0.889095	0.355	0.523	1.09769e-28
Pik3ip1	5.02864e-33	-0.708931	0.178	0.355	1.09901e-28
Hnrnpa2b1	5.06367e-33	-0.227079	0.793	0.97	1.10666e-28
Arhgap5	5.49501e-33	-0.282878	0.61	0.776	1.20094e-28
Prkar2a	5.94885e-33	-0.490213	0.563	0.708	1.30012e-28
Sorbs1	6.09021e-33	1.97784	0.207	0.072	1.33101e-28
Ppid	6.52783e-33	-0.400031	0.584	0.751	1.42666e-28
Jph1	6.83068e-33	-0.319191	0.507	0.681	1.49285e-28
P2rx5	7.08778e-33	-2.11924	0.045	0.201	1.54903e-28
Emc6	7.51744e-33	-0.294521	0.737	0.937	1.64294e-28
Pdlim7	7.58238e-33	-1.90363	0.112	0.281	1.65713e-28
Itgb6	8.37278e-33	2.18372	0.197	0.067	1.82987e-28
Fam13c	8.63188e-33	-0.797624	0.331	0.516	1.8865e-28
Ybx3	8.83743e-33	-0.48673	0.58	0.736	1.93142e-28
Tpm3	8.88663e-33	-0.398352	0.644	0.825	1.94217e-28
Herpud1	8.94603e-33	0.636287	0.896	0.968	1.95516e-28
Tmem159	9.06661e-33	-0.57802	0.524	0.678	1.98151e-28
Ubtd1	9.1749e-33	-0.433645	0.502	0.659	2.00517e-28
Mcrip1	1.018e-32	-0.343592	0.62	0.789	2.22485e-28
Lrp11	1.02491e-32	-0.182138	0.697	0.864	2.23994e-28
Evl	1.03277e-32	-0.327175	0.684	0.857	2.25712e-28
9530077C05Rik	1.1212e-32	1.09566	0.555	0.367	2.45038e-28
Tceal1	1.14417e-32	-0.386197	0.57	0.729	2.50058e-28
Ankrd37	1.15691e-32	-0.674936	0.381	0.548	2.52842e-28
Arrb2	1.20384e-32	-0.398348	0.612	0.773	2.63098e-28
Vps4a	1.28966e-32	-0.607187	0.447	0.607	2.81854e-28
Ppp1r2	1.69748e-32	-0.278422	0.763	0.955	3.70984e-28
Hcfc1r1	1.90851e-32	-0.313624	0.777	0.97	4.17105e-28
Rpl11	1.94012e-32	0.188565	0.876	0.99	4.24014e-28
Atp2c1	1.99046e-32	-0.132906	0.705	0.862	4.35016e-28
Rab7	2.43376e-32	-0.298283	0.662	0.833	5.31898e-28
Tmem158	2.44843e-32	1.70141	0.313	0.145	5.35105e-28
Wdr17	2.76322e-32	-0.399929	0.42	0.575	6.03903e-28
Kxd1	2.84369e-32	-0.401183	0.552	0.715	6.21489e-28
Fam172a	3.02026e-32	-0.496733	0.526	0.684	6.60078e-28
Map6	3.05299e-32	-0.375229	0.425	0.595	6.67231e-28
Fgfbp3	3.55589e-32	-0.633382	0.514	0.669	7.77139e-28
Crebrf	3.60674e-32	-0.62957	0.378	0.544	7.88253e-28
Scin	3.6904e-32	-0.494805	0.619	0.806	8.06537e-28
Rnps1	3.85552e-32	-0.522466	0.605	0.774	8.42624e-28
Klf9	3.86821e-32	-0.772794	0.284	0.455	8.45396e-28
Cdc37	3.89331e-32	-0.353639	0.672	0.848	8.50884e-28
Snrpf	4.06871e-32	-0.252452	0.772	0.961	8.89216e-28
Zmynd11	4.20978e-32	-0.436197	0.592	0.756	9.20047e-28
Rab5if	4.26856e-32	-0.439632	0.605	0.764	9.32894e-28
Marcksl1	4.27154e-32	-0.698726	0.209	0.392	9.33545e-28
Cgnl1	5.02272e-32	2.62595	0.084	0.012	1.09771e-27
Bean1	5.19603e-32	-0.309807	0.493	0.655	1.13559e-27
Bcl10	5.27177e-32	-0.697381	0.438	0.602	1.15215e-27
Arid4b	5.27444e-32	-0.347232	0.53	0.684	1.15273e-27
Elof1	5.5676e-32	-0.292633	0.725	0.919	1.2168e-27
Stk38l	5.5834e-32	-1.2878	0.15	0.324	1.22025e-27
Phf5a	5.73838e-32	-0.453647	0.583	0.74	1.25412e-27
D430019H16Rik	5.76429e-32	2.09263	0.117	0.025	1.25979e-27
Erp29	5.79777e-32	-0.118208	0.806	0.965	1.2671e-27
Ociad2	6.11017e-32	-0.563271	0.404	0.58	1.33538e-27
Dapk1	6.57369e-32	-0.78999	0.324	0.49	1.43668e-27
Ttc4	6.66885e-32	-0.50615	0.396	0.554	1.45748e-27
Prr13	6.91023e-32	-0.404125	0.553	0.716	1.51023e-27
Rabggtb	6.94244e-32	-0.395043	0.538	0.698	1.51727e-27
Eif5a	7.39136e-32	-0.295032	0.79	0.974	1.61538e-27
Ankrd10	7.55301e-32	-0.303898	0.611	0.766	1.65071e-27
Ift43	8.21392e-32	-0.299031	0.746	0.953	1.79515e-27
Eid2	8.75639e-32	-0.312545	0.66	0.848	1.91371e-27
Samd4b	1.01612e-31	-0.475605	0.505	0.66	2.22073e-27
Hnrnpl	1.05367e-31	-0.761216	0.359	0.524	2.3028e-27
Mtf2	1.10029e-31	-1.05975	0.198	0.367	2.40469e-27
Rps9	1.21818e-31	-0.313099	0.837	0.984	2.66232e-27
Vta1	1.24325e-31	-0.359865	0.655	0.828	2.71711e-27
Desi2	1.25265e-31	-0.603462	0.473	0.638	2.73766e-27
Fbxo22	1.4535e-31	-0.359051	0.509	0.68	3.17662e-27
Rufy2	1.69706e-31	-0.275676	0.701	0.884	3.70893e-27
Ier2	1.77656e-31	-1.23358	0.136	0.31	3.88267e-27
Timp2	1.96944e-31	-1.37369	0.043	0.193	4.3042e-27
Irak3	1.99844e-31	1.44449	0.383	0.199	4.36759e-27
Zcchc7	2.00402e-31	-0.181944	0.62	0.796	4.37978e-27
Becn1	2.00811e-31	-0.368153	0.662	0.832	4.38874e-27
Cttn	2.03787e-31	-0.585209	0.424	0.585	4.45376e-27
Mthfd2l	2.1487e-31	-0.348867	0.678	0.865	4.69598e-27
Hipk2	2.32761e-31	-0.31599	0.34	0.509	5.08699e-27
Mical2	2.42868e-31	-0.513805	0.493	0.65	5.30788e-27
Rab14	2.52198e-31	-0.178925	0.768	0.947	5.5118e-27
Rps6kc1	2.66128e-31	-0.990587	0.237	0.405	5.81622e-27
Fstl1	2.82431e-31	1.46863	0.065	0.006	6.17252e-27
Vmn2r30	3.07818e-31	9.6918	0.072	0.002	6.72735e-27
Mvb12a	3.13097e-31	-0.411004	0.538	0.694	6.84274e-27
Aff3	3.16906e-31	-1.1545	0.111	0.277	6.92599e-27
Tubb2b	3.45963e-31	-0.344861	0.784	0.974	7.56103e-27
Dazap1	3.60683e-31	-0.40575	0.56	0.726	7.88272e-27
Rbm18	3.62104e-31	-0.463872	0.569	0.728	7.91379e-27
Cdkl3	3.78018e-31	-0.444819	0.434	0.589	8.26159e-27
Ppp3r1	3.82703e-31	-0.317851	0.657	0.828	8.36397e-27
Ablim2	3.92467e-31	-0.312007	0.509	0.671	8.57737e-27
Ublcp1	3.96504e-31	1.16881	0.62	0.485	8.66559e-27
Rps27	4.12288e-31	-0.307581	0.848	0.986	9.01056e-27
Sema7a	4.53493e-31	-1.50386	0.092	0.261	9.9111e-27
Erlin1	4.73174e-31	1.59603	0.386	0.209	1.03412e-26
Ltbp2	4.88197e-31	6.11116	0.048	0.001	1.06695e-26
Bok	5.31273e-31	-0.489016	0.508	0.656	1.1611e-26
Sgpp1	5.7281e-31	-0.875391	0.274	0.438	1.25188e-26
Hsdl2	5.93784e-31	-0.53155	0.467	0.613	1.29771e-26
Gm42372	6.04589e-31	-0.777893	0.356	0.518	1.32133e-26
Klhl24	6.35233e-31	-0.395684	0.523	0.679	1.3883e-26
Cyth2	6.65552e-31	-0.404979	0.585	0.748	1.45456e-26
Gsk3a	7.10464e-31	-0.349675	0.643	0.818	1.55272e-26
Atn1	7.23362e-31	-0.331089	0.607	0.776	1.58091e-26
Ube2b	7.90031e-31	-0.331899	0.766	0.957	1.72661e-26
Snrpd2	8.02982e-31	-0.297968	0.761	0.957	1.75492e-26
Eloc	9.52887e-31	-0.276702	0.765	0.961	2.08254e-26
Ncor1	9.61768e-31	-0.347277	0.7	0.868	2.10194e-26
Derl1	9.74729e-31	1.49672	0.633	0.481	2.13027e-26
Csnk1e	9.76136e-31	-0.533126	0.53	0.677	2.13334e-26
Zmat5	9.76658e-31	-0.41755	0.637	0.806	2.13449e-26
Mrps10	9.85967e-31	-0.689832	0.427	0.577	2.15483e-26
Cerk	9.87436e-31	-0.322876	0.527	0.673	2.15804e-26
Sgip1	1.01898e-30	-0.479116	0.459	0.611	2.22697e-26
Spin1	1.02594e-30	-0.703018	0.461	0.608	2.2422e-26
Eny2	1.05407e-30	-0.522868	0.522	0.673	2.30367e-26
Wdr26	1.10484e-30	-0.43069	0.568	0.729	2.41463e-26
Paip2	1.19079e-30	-0.267918	0.718	0.916	2.60247e-26
E030030I06Rik	1.21532e-30	-2.63947	0.034	0.178	2.65609e-26
Heca	1.28935e-30	-0.783385	0.328	0.502	2.81787e-26
Setd1b	1.31287e-30	-0.655353	0.303	0.475	2.86928e-26
Trappc6b	1.33845e-30	-0.215538	0.729	0.926	2.92519e-26
Uqcrc2	1.38407e-30	-0.325501	0.73	0.931	3.02488e-26
Igll1	1.38926e-30	3.87033	0.07	0.008	3.03623e-26
Fry	1.40292e-30	-0.540655	0.396	0.555	3.06608e-26
Asb5	1.54249e-30	2.93493	0.068	0.007	3.37111e-26
Mapkap1	1.55285e-30	-0.250135	0.77	0.96	3.39375e-26
Prkacb	1.7341e-30	-1.12589	0.204	0.373	3.78988e-26
Ydjc	1.83417e-30	1.64317	0.253	0.105	4.00858e-26
Zfp523	1.90118e-30	-0.540483	0.462	0.616	4.15504e-26
Hnrnpf	1.90601e-30	-0.297219	0.734	0.917	4.16559e-26
Vps29	2.09008e-30	-0.32095	0.742	0.945	4.56787e-26
Caly	2.14905e-30	-2.0118	0.02	0.154	4.69675e-26
Nav3	2.15257e-30	-1.49374	0.136	0.307	4.70443e-26
Zfp664	2.21564e-30	-0.484173	0.589	0.739	4.84228e-26
Lrp8	2.44459e-30	-0.116418	0.758	0.912	5.34266e-26
Acp2	2.49787e-30	0.231082	0.435	0.595	5.4591e-26
Heg1	2.6652e-30	-0.683123	0.339	0.503	5.8248e-26
Chrna10	2.89703e-30	1.58448	0.471	0.288	6.33146e-26
Nacad	2.90725e-30	-0.501306	0.392	0.555	6.3538e-26
March2	2.9414e-30	-0.331113	0.691	0.847	6.42843e-26
Tmem218	3.12617e-30	-0.407688	0.441	0.586	6.83225e-26
Psmb8	3.23299e-30	1.55386	0.2	0.071	7.06569e-26
Pdk1	3.24924e-30	-1.0668	0.226	0.394	7.1012e-26
Zmiz2	3.45159e-30	-0.564051	0.336	0.498	7.54344e-26
Ggnbp2	3.50776e-30	-0.394367	0.539	0.683	7.66621e-26
Tmbim6	3.86258e-30	0.673498	0.963	0.99	8.44166e-26
Ube2r2	3.8907e-30	-0.357373	0.616	0.794	8.50313e-26
Stxbp3	3.97017e-30	-0.602957	0.43	0.574	8.67681e-26
Ccdc124	4.03417e-30	-0.441337	0.67	0.852	8.81668e-26
Lztfl1	4.14038e-30	-0.21264	0.588	0.736	9.0488e-26
Tceal9	4.24669e-30	-0.26132	0.732	0.922	9.28114e-26
Cstf2t	4.29597e-30	-2.13949	0.095	0.252	9.38884e-26
B4galt1	4.50862e-30	-0.455895	0.391	0.552	9.85358e-26
Pdlim2	4.54316e-30	-0.196631	0.752	0.933	9.92908e-26
Mrps33	4.60484e-30	0.34189	0.822	0.971	1.00639e-25
Foxg1	5.00615e-30	-0.249443	0.773	0.947	1.09409e-25
Agbl2	5.03183e-30	3.21332	0.062	0.005	1.09971e-25
Padi2	5.22484e-30	-0.25855	0.73	0.912	1.14189e-25
Slc16a6	5.41122e-30	-2.04714	0.022	0.156	1.18262e-25
Cfap298	5.93877e-30	-0.479116	0.54	0.701	1.29792e-25
Eaf1	6.67729e-30	-0.135077	0.732	0.915	1.45932e-25
Rsph9	6.73958e-30	0.583764	0.823	0.956	1.47294e-25
Zfp706	6.92037e-30	-0.290683	0.713	0.908	1.51245e-25
Erg28	7.21312e-30	-0.152774	0.597	0.761	1.57643e-25
Fam135a	7.36713e-30	-0.811787	0.144	0.315	1.61009e-25
Msh3	7.64043e-30	1.47841	0.321	0.15	1.66982e-25
Mif	7.92947e-30	-0.287431	0.689	0.862	1.73299e-25
Cep164	7.96905e-30	-0.293295	0.621	0.768	1.74164e-25
Polr2c	8.15476e-30	-0.256278	0.737	0.937	1.78222e-25
Gdap1	8.91089e-30	-0.268377	0.732	0.914	1.94748e-25
Ppp2r5a	8.95044e-30	-0.344802	0.379	0.532	1.95612e-25
Rabgap1l	9.13162e-30	-0.143478	0.741	0.906	1.99572e-25
Rassf7	9.26488e-30	-0.789608	0.397	0.543	2.02484e-25
H3f3a	9.3611e-30	-0.310348	0.84	0.986	2.04587e-25
Prcp	9.65792e-30	-1.42616	0.101	0.262	2.11074e-25
Cdc5l	1.08335e-29	-0.447062	0.553	0.703	2.36766e-25
Grsf1	1.09804e-29	-0.626492	0.455	0.615	2.39977e-25
Anp32b	1.17506e-29	-0.263867	0.735	0.939	2.56809e-25
Cfap100	1.19406e-29	-0.494597	0.453	0.615	2.60963e-25
Snrnp70	1.20837e-29	-0.303317	0.717	0.894	2.64089e-25
Mrps12	1.2334e-29	-0.421639	0.648	0.828	2.6956e-25
Bcr	1.36502e-29	-0.847042	0.25	0.418	2.98326e-25
Txnrd3	1.37786e-29	-1.20831	0.228	0.392	3.0113e-25
Cnot4	1.6379e-29	-0.589376	0.448	0.593	3.57964e-25
1700007K13Rik	1.71866e-29	-0.607772	0.401	0.563	3.75613e-25
Ebf3	1.72604e-29	-0.16625	0.72	0.889	3.77226e-25
1110038F14Rik	1.76055e-29	-0.417904	0.541	0.686	3.84769e-25
Smarca5	1.80264e-29	-0.304384	0.693	0.847	3.93968e-25
Usp3	2.04686e-29	-0.899102	0.318	0.473	4.47342e-25
Zfp644	2.13392e-29	-0.44151	0.473	0.616	4.66369e-25
Ogt	2.2678e-29	-0.469208	0.578	0.72	4.95629e-25
Usp18	2.34818e-29	-2.19104	0.04	0.182	5.13194e-25
Ppp1cb	2.41476e-29	-0.259832	0.574	0.714	5.27745e-25
Sugt1	2.4733e-29	-0.327505	0.667	0.841	5.4054e-25
Pcsk1	2.54745e-29	-1.33153	0.106	0.268	5.56746e-25
Strap	2.57566e-29	-0.224334	0.617	0.774	5.6291e-25
Arid5a	2.7134e-29	-0.537815	0.368	0.532	5.93013e-25
Smchd1	2.7749e-29	-0.393588	0.292	0.474	6.06453e-25
Pdia5	2.78406e-29	1.81812	0.473	0.279	6.08456e-25
Numa1	2.93193e-29	-0.331652	0.53	0.686	6.40774e-25
Ppp3cb	3.13043e-29	-0.303926	0.673	0.823	6.84156e-25
Spty2d1	3.73466e-29	-0.427469	0.597	0.75	8.16209e-25
Atf7ip	3.97521e-29	-0.553854	0.364	0.524	8.68782e-25
Plekhf2	4.13123e-29	-0.952142	0.197	0.362	9.02881e-25
Spef1	4.59082e-29	-0.390615	0.452	0.602	1.00332e-24
Polr3gl	4.60586e-29	-0.642396	0.492	0.638	1.00661e-24
Dand5	4.6634e-29	-1.22353	0.126	0.289	1.01919e-24
Fam216a	5.04852e-29	-0.477918	0.543	0.688	1.10335e-24
Ggps1	5.14819e-29	-0.580869	0.408	0.557	1.12514e-24
Ldlrap1	5.61986e-29	2.0925	0.174	0.058	1.22822e-24
Bst2	6.10587e-29	-0.115063	0.77	0.934	1.33444e-24
Tomm34	6.22995e-29	-0.563294	0.417	0.571	1.36155e-24
Rtl8a	6.29853e-29	-0.510363	0.523	0.666	1.37654e-24
Bpnt1	6.92313e-29	-0.258415	0.578	0.743	1.51305e-24
Rsbn1	7.10022e-29	-0.504438	0.516	0.653	1.55175e-24
Abcg1	7.38398e-29	1.39091	0.466	0.276	1.61377e-24
Nin	7.44484e-29	-0.445563	0.558	0.702	1.62707e-24
Slc9a3r2	8.00235e-29	-3.99506	0.013	0.136	1.74891e-24
Ddx58	8.01023e-29	-0.673984	0.367	0.525	1.75064e-24
Rrm2b	8.39321e-29	-0.360133	0.508	0.657	1.83434e-24
Lekr1	8.63885e-29	-0.952568	0.283	0.443	1.88802e-24
Larp1	9.01268e-29	-0.111269	0.584	0.741	1.96972e-24
Ostf1	9.27808e-29	-1.05757	0.217	0.378	2.02773e-24
Fis1	9.41682e-29	-0.292637	0.794	0.975	2.05805e-24
Vmn2r36	9.90887e-29	6.17067	0.063	0.003	2.16558e-24
Fkbp5	9.99168e-29	-0.527249	0.414	0.553	2.18368e-24
Ssx2ip	1.02975e-28	-0.481669	0.447	0.598	2.25052e-24
Mpp7	1.03894e-28	-0.134924	0.474	0.627	2.27059e-24
Myh9	1.05136e-28	-0.803574	0.289	0.446	2.29774e-24
Akirin2	1.11825e-28	-0.361403	0.636	0.785	2.44395e-24
Capza2	1.19471e-28	-0.347068	0.689	0.872	2.61104e-24
Hnrnpk	1.24503e-28	-0.231267	0.783	0.968	2.72102e-24
Cwc15	1.27238e-28	-0.368371	0.65	0.835	2.78079e-24
Nsdhl	1.30967e-28	-0.601914	0.293	0.443	2.86228e-24
Adh5	1.33461e-28	-0.25106	0.742	0.941	2.9168e-24
Pknox1	1.33509e-28	-1.24797	0.186	0.347	2.91784e-24
Samm50	1.41232e-28	-0.22974	0.695	0.86	3.08663e-24
Cyfip2	1.41429e-28	-0.235222	0.768	0.933	3.09093e-24
Timm17a	1.50155e-28	-0.194476	0.763	0.947	3.28164e-24
Plxna3	1.68158e-28	-0.888479	0.205	0.366	3.6751e-24
Taok1	1.86483e-28	-0.47362	0.434	0.59	4.0756e-24
Vps4b	1.96186e-28	-0.246864	0.595	0.756	4.28764e-24
Tmem222	2.00514e-28	-0.689544	0.349	0.504	4.38224e-24
Npepl1	2.04316e-28	-1.20177	0.167	0.333	4.46533e-24
Slc16a11	2.05251e-28	-0.211057	0.746	0.923	4.48577e-24
Cggbp1	2.23136e-28	-0.238735	0.612	0.755	4.87664e-24
D030056L22Rik	2.25658e-28	-0.833901	0.363	0.506	4.93176e-24
Tmem9b	2.64747e-28	-0.421912	0.41	0.566	5.78604e-24
Cux1	2.81498e-28	-0.251441	0.557	0.7	6.15214e-24
Sirt5	2.93002e-28	-0.83046	0.317	0.471	6.40357e-24
Marveld3	3.10836e-28	2.17879	0.062	0.006	6.79332e-24
Rnf182	3.14143e-28	-0.118477	0.695	0.867	6.86559e-24
Arhgdig	3.14799e-28	0.290099	0.863	0.98	6.87994e-24
Krt90	3.30428e-28	-0.537054	0.496	0.628	7.2215e-24
Cyp20a1	3.65141e-28	-0.594931	0.397	0.542	7.98015e-24
Ndel1	3.72139e-28	-0.583133	0.545	0.696	8.1331e-24
Dnm1l	3.97253e-28	-0.305514	0.661	0.825	8.68196e-24
Pcmt1	4.06133e-28	-0.165941	0.782	0.955	8.87604e-24
Med10	4.06487e-28	0.706383	0.77	0.927	8.88378e-24
Pabpn1	4.31214e-28	-0.349798	0.49	0.64	9.42417e-24
Cyb5r2	4.55594e-28	-3.13107	0.011	0.13	9.95701e-24
Psmd7	4.56504e-28	-0.198717	0.728	0.912	9.97689e-24
Aimp1	4.591e-28	-0.285058	0.722	0.915	1.00336e-23
Sap30l	5.04133e-28	-0.47804	0.579	0.718	1.10178e-23
4833439L19Rik	5.09385e-28	-0.429847	0.591	0.751	1.11326e-23
Wasf2	5.34879e-28	-0.267202	0.604	0.752	1.16898e-23
Tmed10	5.43031e-28	0.486741	0.854	0.972	1.18679e-23
Rpl18a	5.52967e-28	-0.268648	0.861	0.989	1.20851e-23
Clk1	5.54467e-28	-0.397051	0.491	0.64	1.21179e-23
Acp1	5.63185e-28	-0.321003	0.696	0.882	1.23084e-23
Pif1	5.63363e-28	1.29503	0.309	0.15	1.23123e-23
Faah	5.67753e-28	-1.06493	0.132	0.291	1.24083e-23
H2ax	5.68588e-28	-0.519995	0.505	0.64	1.24265e-23
Osbpl8	6.03377e-28	1.0424	0.682	0.601	1.31868e-23
Lingo1	6.20594e-28	-1.75721	0.029	0.16	1.35631e-23
Olfm1	6.30402e-28	-0.206989	0.885	0.988	1.37774e-23
Akt1	6.47052e-28	-0.334241	0.549	0.711	1.41413e-23
Gm12216	6.72534e-28	3.07669	0.099	0.021	1.46982e-23
Ddx24	6.93115e-28	-0.228872	0.695	0.863	1.5148e-23
Meaf6	6.9436e-28	-0.590637	0.514	0.645	1.51752e-23
Dctn6	6.96841e-28	-0.265445	0.719	0.887	1.52295e-23
Armcx1	7.51956e-28	-0.28276	0.511	0.662	1.6434e-23
Serbp1	7.59385e-28	-0.303176	0.782	0.972	1.65964e-23
Mrpl40	7.71742e-28	-0.595882	0.459	0.6	1.68664e-23
Wdr33	7.91201e-28	-0.437515	0.396	0.535	1.72917e-23
H1f10	7.92263e-28	1.12505	0.461	0.281	1.73149e-23
Pak6	7.97192e-28	-1.00885	0.144	0.308	1.74226e-23
Bptf	8.4012e-28	-0.452719	0.538	0.686	1.83608e-23
Capza1	8.62542e-28	-0.468363	0.548	0.691	1.88509e-23
Hnrnpm	8.70605e-28	-0.21935	0.712	0.911	1.90271e-23
Adamts18	8.94785e-28	2.47745	0.169	0.057	1.95555e-23
Spsb4	9.62135e-28	2.28704	0.071	0.01	2.10275e-23
Ptrh2	1.00851e-27	1.40047	0.473	0.311	2.2041e-23
Adam19	1.05161e-27	-0.602005	0.291	0.447	2.2983e-23
Ndufb7	1.18476e-27	0.304928	0.835	0.975	2.5893e-23
S100a5	1.197e-27	-4.3816	0.038	0.189	2.61604e-23
Trappc10	1.23494e-27	-0.710612	0.316	0.462	2.69897e-23
Mettl23	1.24355e-27	-0.262283	0.717	0.914	2.71778e-23
Snapc1	1.38395e-27	-0.471513	0.419	0.562	3.02463e-23
Fkbp1b	1.42808e-27	4.02056	0.06	0.006	3.12107e-23
Hdgf	1.50105e-27	-0.281128	0.702	0.895	3.28054e-23
Elmod3	1.5593e-27	-0.231369	0.737	0.933	3.40785e-23
Riiad1	1.56155e-27	-0.487377	0.491	0.622	3.41276e-23
Abracl	1.67246e-27	-1.33087	0.244	0.401	3.65515e-23
Fgf9	1.74488e-27	-0.811511	0.361	0.51	3.81345e-23
Inpp1	1.82891e-27	-1.10812	0.164	0.322	3.99708e-23
Akap13	1.86558e-27	-0.692245	0.248	0.398	4.07721e-23
Csnk1g2	1.87632e-27	-0.405193	0.649	0.814	4.10069e-23
Hsd17b4	2.00816e-27	-0.542459	0.535	0.669	4.38884e-23
Sltm	2.10183e-27	-0.279967	0.644	0.796	4.59354e-23
Atl3	2.2674e-27	-0.671106	0.363	0.51	4.95541e-23
Bcl2l1	2.29312e-27	-0.617614	0.471	0.609	5.01162e-23
Sub1	2.30826e-27	-0.210658	0.755	0.94	5.0447e-23
Akap9	2.41578e-27	-0.353028	0.687	0.86	5.27968e-23
Slc24a2	2.45436e-27	-0.117443	0.704	0.862	5.364e-23
Flot1	2.77748e-27	0.713978	0.773	0.866	6.07019e-23
Sacs	2.80045e-27	-1.51293	0.092	0.243	6.12038e-23
Tbca	2.83171e-27	-0.215785	0.793	0.97	6.18871e-23
Tmod3	2.95175e-27	1.15714	0.433	0.25	6.45106e-23
Smpdl3a	2.95331e-27	-3.29063	0.044	0.176	6.45446e-23
Ccdc192	2.98738e-27	2.5054	0.087	0.016	6.52893e-23
Rab24	3.11949e-27	-0.325043	0.669	0.836	6.81764e-23
Mab21l2	3.29184e-27	3.78415	0.051	0.004	7.19432e-23
Sertad2	3.40396e-27	-0.647201	0.376	0.526	7.43936e-23
Stx8	3.60177e-27	-0.346888	0.59	0.741	7.87167e-23
Atic	3.88034e-27	-0.712761	0.357	0.508	8.48049e-23
Dynll2	4.01335e-27	-0.241708	0.817	0.977	8.77117e-23
Zfp235	4.67777e-27	-0.903617	0.292	0.445	1.02233e-22
Rpain	4.91783e-27	-0.459642	0.619	0.766	1.07479e-22
Ubtf	5.01723e-27	-0.336321	0.605	0.761	1.09652e-22
Rab22a	5.10714e-27	-0.393561	0.447	0.581	1.11617e-22
Mrpl4	5.15797e-27	-0.394807	0.419	0.556	1.12728e-22
Pde7b	5.20004e-27	-2.27818	0.043	0.175	1.13647e-22
Srgap1	5.57102e-27	-0.250554	0.734	0.927	1.21755e-22
Gdi1	5.62967e-27	-0.2914	0.692	0.858	1.23036e-22
Hadhb	5.65602e-27	-0.559429	0.496	0.625	1.23612e-22
Csdc2	5.69104e-27	1.3604	0.466	0.283	1.24378e-22
Klhl28	5.71027e-27	-0.407291	0.507	0.631	1.24798e-22
Ift20	5.9475e-27	-0.226318	0.715	0.893	1.29983e-22
Acyp2	5.97371e-27	-0.583024	0.39	0.538	1.30555e-22
Mrps31	6.49132e-27	-0.472992	0.493	0.649	1.41868e-22
Ankrd13a	6.50821e-27	-0.571034	0.403	0.543	1.42237e-22
Larp4b	6.77266e-27	-0.32733	0.464	0.618	1.48017e-22
Tbl1xr1	6.81567e-27	-0.653682	0.337	0.49	1.48956e-22
Kmt2a	7.01186e-27	-0.216587	0.556	0.703	1.53244e-22
Ppp1r37	7.57899e-27	-0.384946	0.592	0.728	1.65639e-22
Elob	7.60696e-27	-0.260458	0.849	0.986	1.6625e-22
Slc30a9	8.18159e-27	-0.403793	0.622	0.762	1.78809e-22
Cgref1	8.23806e-27	1.04758	0.584	0.426	1.80043e-22
Gm43517	8.70608e-27	-0.439574	0.577	0.733	1.90271e-22
Tmpo	9.45889e-27	-0.445575	0.436	0.58	2.06724e-22
Abhd3	1.12681e-26	0.913877	0.755	0.813	2.46264e-22
Fam104a	1.15116e-26	-0.310855	0.747	0.941	2.51585e-22
Dcaf11	1.17818e-26	-0.371223	0.585	0.736	2.57492e-22
Plxdc2	1.18293e-26	1.70091	0.166	0.057	2.58529e-22
Kif3a	1.29865e-26	-0.250746	0.711	0.883	2.83819e-22
Sft2d2	1.34634e-26	1.01495	0.712	0.663	2.94242e-22
Gnl3l	1.38569e-26	-0.400412	0.568	0.709	3.02844e-22
Fam53c	1.40093e-26	-0.242867	0.539	0.678	3.06172e-22
Ttc9b	1.57391e-26	-0.366998	0.579	0.731	3.43978e-22
Rnf227	1.60068e-26	-0.55376	0.348	0.502	3.49828e-22
Chst11	1.60275e-26	-1.27986	0.069	0.212	3.50281e-22
H2bc4	1.61753e-26	0.62481	0.793	0.921	3.53512e-22
Lactb2	1.62074e-26	-0.53929	0.303	0.452	3.54213e-22
Tmem248	1.6768e-26	1.36163	0.38	0.214	3.66465e-22
Lgi1	1.67959e-26	1.14519	0.424	0.248	3.67075e-22
Taok3	1.69594e-26	-0.532387	0.458	0.6	3.70647e-22
Zfp398	2.0249e-26	-0.84888	0.216	0.37	4.42543e-22
Ccdc148	2.07096e-26	-0.663189	0.302	0.442	4.52609e-22
Pkn2	2.19832e-26	-0.172396	0.583	0.744	4.80443e-22
Cbx1	2.27768e-26	-0.201994	0.641	0.792	4.97787e-22
Mgat4b	2.29315e-26	-0.22365	0.746	0.932	5.01167e-22
Setdb2	2.36056e-26	-0.637215	0.198	0.354	5.159e-22
Ccl25	2.53379e-26	-0.839013	0.301	0.45	5.5376e-22
Arid3a	2.60366e-26	-0.463676	0.263	0.415	5.6903e-22
Ctbp2	2.72801e-26	-1.0453	0.045	0.179	5.96207e-22
Anks1b	2.81062e-26	-0.907131	0.197	0.355	6.14262e-22
Suclg2	2.83573e-26	-1.05924	0.058	0.196	6.19748e-22
Rbm42	2.90484e-26	-0.49739	0.558	0.711	6.34853e-22
Pdcd7	2.93115e-26	-0.793708	0.265	0.416	6.40603e-22
Ufd1	3.03848e-26	-0.350001	0.58	0.722	6.64059e-22
Psmd8	3.16334e-26	-0.340272	0.733	0.93	6.91349e-22
H2az1	3.28857e-26	-0.290302	0.82	0.976	7.18717e-22
Tasor	3.46785e-26	-0.171012	0.538	0.672	7.57898e-22
Znhit1	3.53881e-26	-0.234445	0.745	0.941	7.73407e-22
Fcho2	3.57578e-26	-0.541618	0.422	0.55	7.81487e-22
Prorsd1	3.59993e-26	-0.429584	0.448	0.584	7.86764e-22
Btbd7	3.64779e-26	-0.329622	0.487	0.638	7.97224e-22
Amn1	3.733e-26	-0.196961	0.693	0.86	8.15847e-22
Cops5	4.00486e-26	-0.239118	0.703	0.87	8.75263e-22
Ahsg	4.01556e-26	4.96475	0.039	0.001	8.776e-22
Mrfap1	4.03552e-26	-0.267638	0.776	0.965	8.81963e-22
Zfp112	4.09928e-26	-0.690568	0.316	0.467	8.95898e-22
Calcoco2	4.15772e-26	1.11712	0.418	0.244	9.0867e-22
Gemin7	4.22608e-26	-0.283556	0.683	0.86	9.23609e-22
Zfp704	4.47496e-26	-1.00506	0.158	0.313	9.78003e-22
Arhgef38	4.54872e-26	-0.25146	0.465	0.607	9.94122e-22
Fads1	4.6555e-26	-2.33491	0.06	0.197	1.01746e-21
Mgat4a	4.65573e-26	-0.490863	0.237	0.391	1.01751e-21
D430042O09Rik	4.89417e-26	-0.24126	0.416	0.557	1.06962e-21
H2ac18	4.96108e-26	1.16229	0.328	0.165	1.08424e-21
C1d	5.03311e-26	-0.192589	0.646	0.815	1.09999e-21
Spsb1	5.16365e-26	-2.24462	0.064	0.2	1.12852e-21
Kazn	5.40464e-26	-0.331159	0.449	0.584	1.18118e-21
Mbnl1	5.42672e-26	-0.270964	0.35	0.5	1.18601e-21
Cops8	5.45032e-26	-0.61819	0.354	0.493	1.19117e-21
Rps7	5.81405e-26	-0.249718	0.882	0.991	1.27066e-21
Nipbl	5.99208e-26	-0.222795	0.524	0.654	1.30957e-21
Ccz1	6.36594e-26	-0.435768	0.57	0.72	1.39128e-21
Reep1	6.55915e-26	-0.58214	0.352	0.493	1.4335e-21
Ufm1	6.65638e-26	-0.245652	0.652	0.826	1.45475e-21
Tle3	6.77588e-26	-0.777759	0.314	0.462	1.48087e-21
Ift74	6.93375e-26	-0.225205	0.695	0.867	1.51537e-21
Ago1	7.42533e-26	2.51315	0.089	0.018	1.62281e-21
Sox11	8.02032e-26	-0.984141	0.12	0.272	1.75284e-21
Pcdh19	8.04533e-26	-0.458315	0.34	0.486	1.75831e-21
Iqcb1	8.12115e-26	-1.16947	0.221	0.37	1.77488e-21
Ano1	8.17098e-26	-0.164115	0.423	0.569	1.78577e-21
Zfp24	8.1984e-26	-0.869947	0.274	0.422	1.79176e-21
Cnih1	8.23794e-26	-0.184822	0.698	0.851	1.8004e-21
N4bp2l2	8.26463e-26	-0.197878	0.458	0.601	1.80624e-21
Nelfcd	8.32593e-26	-0.508711	0.413	0.558	1.81963e-21
Thoc2l	8.58841e-26	-0.369666	0.465	0.605	1.877e-21
Rab3a	8.59977e-26	0.209142	0.831	0.977	1.87948e-21
Ctcf	8.64091e-26	-0.554312	0.533	0.666	1.88847e-21
1110059E24Rik	8.64648e-26	-1.5339	0.094	0.236	1.88969e-21
Parl	8.76055e-26	-0.406955	0.517	0.662	1.91462e-21
Ikzf4	8.86482e-26	1.1452	0.489	0.321	1.93741e-21
Cks2	9.12243e-26	0.988331	0.49	0.315	1.99371e-21
Lrrn2	9.1378e-26	1.58554	0.4	0.23	1.99707e-21
Mdm2	9.46389e-26	-0.410587	0.5	0.634	2.06833e-21
Spata7	1.03253e-25	-0.328545	0.457	0.605	2.25659e-21
Tbc1d10c	1.08649e-25	-1.50463	0.099	0.243	2.37452e-21
Dip2c	1.10383e-25	-0.295997	0.436	0.574	2.41242e-21
Cacng2	1.1654e-25	-0.305311	0.594	0.741	2.54699e-21
Atmin	1.18091e-25	-0.668962	0.344	0.49	2.58088e-21
Tmem71	1.25356e-25	3.79099	0.054	0.005	2.73966e-21
Irf2bp1	1.30638e-25	-0.743517	0.329	0.474	2.85509e-21
Smim5	1.31635e-25	-0.936163	0.295	0.446	2.87688e-21
D5Ertd579e	1.38175e-25	-0.286219	0.334	0.479	3.01982e-21
Atpif1	1.41473e-25	-0.260105	0.839	0.986	3.09188e-21
Unc80	1.515e-25	-1.62384	0.064	0.203	3.31102e-21
Zfp386	1.57135e-25	-0.526001	0.457	0.603	3.43418e-21
Tesc	1.61748e-25	-0.25851	0.88	0.99	3.53501e-21
Atp5d	1.62908e-25	-0.305474	0.777	0.97	3.56034e-21
C9orf72	1.78435e-25	-0.780242	0.387	0.527	3.8997e-21
Lsm1	1.8706e-25	-0.421086	0.59	0.741	4.0882e-21
Cpne8	1.90391e-25	-0.359061	0.38	0.543	4.16101e-21
Tspoap1	1.94752e-25	-0.480689	0.37	0.517	4.25631e-21
Cacna2d3	2.02805e-25	-2.61079	0.022	0.139	4.4323e-21
Scube3	2.11142e-25	2.61583	0.066	0.009	4.61451e-21
Txndc17	2.14947e-25	-0.298684	0.738	0.953	4.69767e-21
Mrpl22	2.15158e-25	-0.434551	0.424	0.562	4.70229e-21
Mboat1	2.22249e-25	-3.63591	0.018	0.132	4.85725e-21
Kcns3	2.25643e-25	-0.423151	0.565	0.728	4.93143e-21
Retsat	2.2766e-25	2.7173	0.094	0.021	4.97552e-21
Commd2	2.35757e-25	-0.33889	0.582	0.735	5.15246e-21
Tmem150c	2.38401e-25	-0.530202	0.362	0.503	5.21026e-21
Adprm	2.52515e-25	-0.879119	0.219	0.365	5.51872e-21
Tdrd7	2.53848e-25	-0.871092	0.186	0.336	5.54786e-21
Limd1	2.58914e-25	-1.25442	0.115	0.263	5.65856e-21
Fnta	2.66946e-25	-0.359915	0.606	0.762	5.8341e-21
Shtn1	2.68811e-25	-0.122884	0.505	0.641	5.87486e-21
Pllp	2.72527e-25	-3.94517	0.017	0.129	5.95607e-21
Gle1	2.73655e-25	-0.405958	0.236	0.392	5.98072e-21
Eapp	2.82675e-25	-0.36726	0.447	0.585	6.17786e-21
Ncl	2.8731e-25	-0.248966	0.742	0.92	6.27915e-21
Higd2a	2.87847e-25	-0.273757	0.754	0.952	6.29089e-21
Borcs8	2.99029e-25	-0.351832	0.658	0.835	6.53527e-21
Rpl36al	3.05481e-25	0.563902	0.774	0.943	6.67628e-21
Tmem242	3.08255e-25	-0.646703	0.368	0.507	6.73691e-21
Sdha	3.12655e-25	-0.257839	0.638	0.779	6.83307e-21
Pdcl3	3.15765e-25	-0.391496	0.427	0.56	6.90104e-21
Mreg	3.21627e-25	-0.52045	0.405	0.556	7.02917e-21
Smarcd1	3.28562e-25	-0.302744	0.482	0.623	7.18073e-21
Auh	3.30761e-25	-0.241534	0.725	0.925	7.22879e-21
Snph	3.32588e-25	-0.409713	0.385	0.524	7.26871e-21
Zcchc3	3.39867e-25	-1.22709	0.17	0.318	7.42779e-21
Ppdpf	3.66457e-25	-0.230484	0.76	0.953	8.00892e-21
Txndc9	3.68845e-25	-0.259581	0.656	0.824	8.06111e-21
Smim20	3.76038e-25	-0.381624	0.536	0.667	8.21832e-21
Taf7l	4.05857e-25	5.61111	0.036	0	8.87001e-21
Bcl9l	4.15657e-25	-0.579321	0.345	0.492	9.08418e-21
Cyp4x1	4.20583e-25	-1.09873	0.09	0.235	9.19183e-21
Ggt7	4.24824e-25	-1.05878	0.049	0.179	9.28452e-21
Sesn3	4.31145e-25	1.13492	0.333	0.173	9.42267e-21
Smarcc2	4.35484e-25	-0.487137	0.458	0.597	9.51751e-21
Scrn3	4.4058e-25	-0.709768	0.279	0.426	9.62887e-21
Ahsa2	4.81452e-25	-0.579501	0.438	0.571	1.05221e-20
Cdc37l1	4.90243e-25	-0.401693	0.521	0.66	1.07143e-20
Brd3	4.98842e-25	-0.603711	0.393	0.532	1.09022e-20
Sbk1	5.0859e-25	-0.123417	0.7	0.865	1.11152e-20
Idh3b	5.16168e-25	-0.173566	0.696	0.855	1.12809e-20
Pkib	5.19718e-25	-0.243156	0.764	0.96	1.13584e-20
Sfxn3	5.24622e-25	-0.836827	0.289	0.435	1.14656e-20
Kcmf1	5.51449e-25	-0.319631	0.655	0.807	1.20519e-20
Vdac2	5.79478e-25	-0.269804	0.761	0.955	1.26645e-20
Cct7	6.00411e-25	-0.255137	0.726	0.929	1.3122e-20
Phip	6.08508e-25	-0.424295	0.5	0.625	1.32989e-20
Sarnp	6.5128e-25	-0.252411	0.708	0.886	1.42337e-20
Auts2	6.62466e-25	0.145504	0.776	0.941	1.44782e-20
Zfp871	6.9153e-25	-0.501686	0.379	0.52	1.51134e-20
Rasgrp4	7.06044e-25	-2.78199	0.038	0.161	1.54306e-20
Rundc3b	7.09593e-25	-0.529629	0.245	0.391	1.55082e-20
Ncbp3	7.51608e-25	-0.532435	0.431	0.563	1.64264e-20
Rap2a	7.83584e-25	-0.779356	0.35	0.484	1.71252e-20
Metrnl	8.02996e-25	-3.79958	0.015	0.124	1.75495e-20
Cdkn1c	8.34476e-25	-1.22947	0.557	0.648	1.82375e-20
Sgms1	8.37676e-25	2.87202	0.095	0.022	1.83074e-20
Mapk1	8.59196e-25	-0.199015	0.607	0.767	1.87777e-20
Nr2c2ap	8.64269e-25	-0.388065	0.489	0.624	1.88886e-20
Dusp1	9.16119e-25	-1.15044	0.196	0.346	2.00218e-20
Ssna1	9.65124e-25	-0.428693	0.609	0.735	2.10928e-20
Fbxo44	9.68245e-25	-1.09665	0.053	0.181	2.1161e-20
Atp6v0c	1.02233e-24	-0.141591	0.891	0.987	2.23431e-20
Srsf11	1.03191e-24	-0.31675	0.611	0.755	2.25525e-20
Tcf15	1.06711e-24	-4.07977	0.007	0.11	2.33217e-20
Krcc1	1.09091e-24	-0.268522	0.726	0.923	2.38418e-20
Cep83	1.1036e-24	-0.806583	0.16	0.307	2.41191e-20
Tmem240	1.11223e-24	-1.1542	0.22	0.368	2.43077e-20
Rps14	1.1473e-24	-0.237495	0.858	0.99	2.50742e-20
Pgpep1l	1.1775e-24	2.52001	0.068	0.011	2.57343e-20
Eif3m	1.18345e-24	-0.222283	0.72	0.919	2.58643e-20
Cct8	1.18604e-24	-0.261059	0.695	0.876	2.59209e-20
Sirt7	1.21961e-24	-0.561196	0.504	0.639	2.66545e-20
N6amt1	1.34149e-24	-0.633259	0.343	0.485	2.93183e-20
Rnpepl1	1.34354e-24	-0.331527	0.62	0.768	2.93631e-20
Sap18	1.35047e-24	-0.346518	0.709	0.918	2.95144e-20
Cox6a1	1.36035e-24	0.272986	0.828	0.978	2.97305e-20
Fyttd1	1.38951e-24	-0.258205	0.767	0.956	3.03678e-20
Cacna1a	1.40632e-24	-3.73615	0.016	0.125	3.07352e-20
Reep3	1.44257e-24	-0.49115	0.386	0.528	3.15274e-20
Impa1	1.48451e-24	-0.433241	0.5	0.637	3.24441e-20
Ap2s1	1.50835e-24	0.66834	0.756	0.854	3.29651e-20
Rexo1	1.53505e-24	-0.384375	0.42	0.549	3.35484e-20
Ndfip1	1.6664e-24	-1.08105	0.106	0.251	3.64192e-20
Chl1	1.69168e-24	-2.14478	0.011	0.116	3.69716e-20
Wnt16	1.72243e-24	2.16577	0.042	0.002	3.76437e-20
Dync1i1	1.88291e-24	0.842174	0.694	0.653	4.11511e-20
Cyren	1.9067e-24	-0.687568	0.334	0.484	4.16709e-20
Agpat3	1.99455e-24	-0.493692	0.094	0.235	4.35908e-20
Pard3	2.01632e-24	-0.452133	0.307	0.451	4.40666e-20
Nfyb	2.1164e-24	-0.878855	0.337	0.471	4.62538e-20
Cep126	2.27575e-24	-0.292982	0.564	0.712	4.97365e-20
Nono	2.2759e-24	-0.34775	0.594	0.739	4.97398e-20
Dhcr7	2.43255e-24	-1.37702	0.068	0.202	5.31633e-20
Naf1	2.45802e-24	-0.545688	0.258	0.406	5.37201e-20
Triap1	2.56441e-24	-0.398309	0.454	0.584	5.60451e-20
Eif2ak2	2.57951e-24	-1.2175	0.205	0.35	5.63752e-20
Mlec	2.60493e-24	1.12751	0.495	0.328	5.69308e-20
Fam53a	2.73896e-24	-0.499727	0.347	0.491	5.98599e-20
Wdyhv1	2.76689e-24	-0.683147	0.318	0.455	6.04704e-20
Suds3	2.85368e-24	-0.266382	0.663	0.821	6.23672e-20
Atg3	2.998e-24	-0.327859	0.604	0.739	6.55214e-20
Pmpcb	3.16737e-24	-0.259623	0.593	0.741	6.92229e-20
Otub1	3.38396e-24	-0.336402	0.696	0.872	7.39564e-20
Acsl6	3.44368e-24	0.888983	0.746	0.77	7.52615e-20
Brd2	3.48907e-24	-0.362805	0.536	0.672	7.62537e-20
Cyc1	3.5734e-24	-0.193435	0.7	0.874	7.80967e-20
Elmo2	3.73757e-24	-0.873665	0.238	0.382	8.16846e-20
Nln	3.78e-24	1.45131	0.227	0.099	8.26118e-20
Cfap20	3.7942e-24	-0.249751	0.793	0.973	8.29222e-20
Stk32a	3.82019e-24	0.517818	0.811	0.921	8.34903e-20
Slu7	3.90015e-24	-0.404454	0.456	0.585	8.52378e-20
Crip2	3.92409e-24	-1.47179	0.141	0.287	8.5761e-20
Tdg	4.32363e-24	-0.593391	0.43	0.555	9.4493e-20
Mob2	4.37266e-24	-0.401229	0.467	0.603	9.55645e-20
Ccdc34	4.43862e-24	-0.432718	0.644	0.808	9.7006e-20
Fdx1	4.58249e-24	-0.318104	0.584	0.721	1.0015e-19
F8	4.60002e-24	2.05351	0.261	0.13	1.00533e-19
Snrpd1	4.85905e-24	-0.239387	0.701	0.894	1.06195e-19
Kifap3	5.29072e-24	-0.211869	0.761	0.945	1.15629e-19
Mettl1	5.30304e-24	1.28517	0.362	0.205	1.15898e-19
Sdc3	5.31949e-24	0.216064	0.701	0.861	1.16257e-19
Bcl2l2	5.47506e-24	-0.58142	0.428	0.566	1.19657e-19
Fgfr1op2	5.56216e-24	-0.197554	0.728	0.906	1.21561e-19
Npm1	5.84771e-24	-0.257819	0.748	0.944	1.27802e-19
Xbp1	5.96733e-24	1.02247	0.697	0.648	1.30416e-19
Rarg	6.0142e-24	-0.308576	0.482	0.623	1.3144e-19
Snx18	6.26106e-24	-0.792981	0.166	0.313	1.36836e-19
Golga7	6.43203e-24	-0.397213	0.429	0.552	1.40572e-19
Cs	6.55032e-24	-0.347876	0.494	0.625	1.43157e-19
Mxra7	7.00988e-24	-0.117556	0.731	0.911	1.53201e-19
Kctd13	7.46815e-24	-0.361218	0.592	0.725	1.63216e-19
Fam13b	7.60982e-24	-0.955079	0.185	0.327	1.66313e-19
Foxo3	7.83614e-24	-1.05248	0.175	0.321	1.71259e-19
Fam13a	8.13071e-24	-0.212308	0.589	0.736	1.77697e-19
Luc7l	8.2078e-24	-0.605244	0.412	0.542	1.79382e-19
Uba1	8.64539e-24	-0.272711	0.573	0.706	1.88945e-19
Flnc	8.66987e-24	4.79496	0.037	0.001	1.8948e-19
Ntan1	8.70422e-24	-0.297725	0.626	0.776	1.90231e-19
Trak1	9.47415e-24	-0.393546	0.382	0.512	2.07058e-19
Mrpl9	9.53531e-24	-0.345105	0.522	0.653	2.08394e-19
Zcchc18	9.71691e-24	-0.162162	0.596	0.756	2.12363e-19
Zfp292	9.92988e-24	-0.415495	0.354	0.49	2.17017e-19
Znhit3	1.03499e-23	-0.558608	0.399	0.528	2.26198e-19
Stk32c	1.04326e-23	1.43414	0.137	0.045	2.28005e-19
Eva1c	1.05214e-23	-3.63002	0.014	0.118	2.29946e-19
Mocs2	1.06065e-23	-0.287249	0.583	0.722	2.31804e-19
Fam45a	1.08115e-23	-0.415487	0.514	0.641	2.36285e-19
Ucp2	1.12539e-23	-0.910916	0.069	0.203	2.45954e-19
Pitpnb	1.13588e-23	-0.235289	0.525	0.661	2.48246e-19
Ash1l	1.22386e-23	-0.397811	0.428	0.549	2.67475e-19
Rprd1a	1.28127e-23	-1.22214	0.179	0.324	2.80022e-19
Herc2	1.30452e-23	-0.2477	0.52	0.659	2.85103e-19
Csrp1	1.34017e-23	1.44473	0.129	0.04	2.92894e-19
Mrpl12	1.38035e-23	-0.249722	0.641	0.779	3.01676e-19
Ccdc174	1.38382e-23	-0.405117	0.39	0.526	3.02434e-19
Tmem258	1.43372e-23	0.440687	0.817	0.963	3.13338e-19
Wdr45b	1.46404e-23	-0.457843	0.493	0.621	3.19966e-19
Strn4	1.49547e-23	-0.315272	0.484	0.608	3.26835e-19
Ikzf5	1.54433e-23	-0.442703	0.339	0.474	3.37513e-19
Cttnbp2nl	1.55593e-23	-0.64872	0.238	0.381	3.40048e-19
Zc3h14	1.56815e-23	-0.229161	0.645	0.793	3.4272e-19
Rere	1.56826e-23	-0.251032	0.427	0.559	3.42744e-19
Ankrd13b	1.57277e-23	-0.391114	0.524	0.652	3.43729e-19
Nppc	1.67895e-23	1.58542	0.2	0.084	3.66935e-19
Bad	1.69424e-23	-0.276248	0.707	0.899	3.70275e-19
Cib2	1.86016e-23	-3.09449	0.023	0.132	4.06538e-19
Emc4	1.95332e-23	-0.200185	0.759	0.947	4.26897e-19
Ddx23	1.9885e-23	-0.508101	0.449	0.583	4.34586e-19
Cited4	1.99075e-23	1.5315	0.165	0.062	4.35077e-19
Anxa6	2.00136e-23	-1.366	0.107	0.245	4.37397e-19
Pcbp1	2.00892e-23	-0.168437	0.725	0.893	4.3905e-19
H2-DMb2	2.00908e-23	-1.1835	0.107	0.243	4.39085e-19
Cfap206	2.04111e-23	-2.34592	0.039	0.157	4.46084e-19
Gatad2b	2.05687e-23	-0.272556	0.385	0.514	4.49528e-19
Steap2	2.13453e-23	-0.232243	0.277	0.444	4.66501e-19
Hk1	2.20706e-23	-0.576502	0.376	0.503	4.82352e-19
Srsf1	2.37472e-23	-0.269152	0.675	0.842	5.18996e-19
Fam174a	2.43002e-23	-0.158805	0.782	0.963	5.3108e-19
Cdc123	2.44391e-23	-0.376642	0.544	0.661	5.34116e-19
Zfp444	2.52991e-23	-1.08027	0.221	0.365	5.52911e-19
Sdhd	2.5986e-23	-0.351691	0.584	0.706	5.67923e-19
Cct4	2.60668e-23	-0.261773	0.701	0.885	5.69691e-19
Trim26	2.70259e-23	-0.500397	0.378	0.516	5.90651e-19
R3hdm1	2.7165e-23	-0.153753	0.59	0.738	5.93691e-19
Sh2d5	2.85163e-23	-1.41805	0.103	0.239	6.23224e-19
Smc3	2.86562e-23	-0.228005	0.656	0.815	6.2628e-19
Dnttip2	2.93334e-23	-0.41114	0.448	0.563	6.41082e-19
Nkiras1	3.10926e-23	-0.201503	0.568	0.692	6.79529e-19
Fam50a	3.2395e-23	-0.619856	0.426	0.554	7.07993e-19
Smim7	3.43996e-23	-0.2531	0.667	0.819	7.51802e-19
Ptchd1	3.48225e-23	-3.4841	0.01	0.11	7.61047e-19
Glt28d2	3.79946e-23	-0.394648	0.393	0.528	8.30372e-19
Kdm1a	3.84089e-23	-0.340211	0.579	0.71	8.39427e-19
Azin1	3.89587e-23	-0.246965	0.599	0.742	8.51443e-19
Cflar	3.92894e-23	-0.310526	0.739	0.929	8.5867e-19
Pick1	4.02999e-23	-0.575312	0.48	0.607	8.80754e-19
Map9	4.1939e-23	-0.328781	0.461	0.587	9.16576e-19
Lamp2	4.33058e-23	0.274544	0.664	0.795	9.46449e-19
Ptpa	4.4828e-23	-0.437088	0.387	0.516	9.79716e-19
Mrpl32	4.51125e-23	-0.289614	0.675	0.845	9.85935e-19
Wasl	4.97535e-23	-0.263234	0.602	0.723	1.08736e-18
Fam169a	5.07734e-23	-1.01234	0.195	0.337	1.10965e-18
Kif5b	5.23471e-23	-0.193654	0.832	0.979	1.14405e-18
Ccdc32	5.62619e-23	-0.551152	0.453	0.568	1.2296e-18
Fdft1	5.86677e-23	-0.344273	0.406	0.538	1.28218e-18
3830406C13Rik	6.15433e-23	-0.27821	0.55	0.68	1.34503e-18
Ndufaf3	6.26373e-23	0.601157	0.732	0.853	1.36894e-18
Gast	6.31384e-23	4.12147	0.042	0.003	1.37989e-18
Uqcrq	6.60502e-23	0.188232	0.834	0.981	1.44353e-18
Hsd17b7	6.72711e-23	-1.01192	0.158	0.296	1.47021e-18
Rxrb	6.97747e-23	-0.370322	0.576	0.696	1.52493e-18
Supt16	7.06834e-23	-0.514314	0.517	0.647	1.54479e-18
Lysmd2	7.07441e-23	0.734917	0.724	0.782	1.54611e-18
Car11	7.42386e-23	-1.18479	0.114	0.252	1.62248e-18
Glo1	7.50027e-23	-0.267189	0.578	0.714	1.63918e-18
Atp5g3	7.78488e-23	-0.210978	0.795	0.969	1.70139e-18
Gabpb2	7.81634e-23	-0.657338	0.26	0.399	1.70826e-18
Cript	7.92819e-23	-0.23468	0.69	0.858	1.73271e-18
Ipmk	8.04014e-23	-0.393527	0.404	0.538	1.75717e-18
Uqcrc1	8.12154e-23	-0.178547	0.691	0.871	1.77496e-18
Lrrc8d	8.22716e-23	3.64322	0.063	0.01	1.79805e-18
Celf1	8.50025e-23	-0.277891	0.54	0.677	1.85773e-18
Fbxl5	8.60726e-23	-0.369156	0.546	0.669	1.88112e-18
H3c7	8.6202e-23	2.06794	0.068	0.012	1.88395e-18
Adgra1	9.12494e-23	6.59938	0.031	0	1.99426e-18
Btbd3	9.24705e-23	-0.371731	0.465	0.589	2.02094e-18
Kcnq1	1.04387e-22	3.8165	0.067	0.012	2.28139e-18
Cycs	1.04749e-22	-0.24003	0.768	0.957	2.2893e-18
Taf15	1.07158e-22	1.06736	0.684	0.643	2.34194e-18
Carns1	1.09743e-22	-0.18201	0.436	0.602	2.39843e-18
Timm13	1.21375e-22	-0.221124	0.767	0.96	2.65265e-18
Ptk2b	1.21441e-22	-2.35404	0.059	0.184	2.65408e-18
Rgcc	1.2198e-22	2.82061	0.073	0.014	2.66588e-18
Cct6a	1.22457e-22	-0.208538	0.693	0.865	2.6763e-18
Hjurp	1.23463e-22	-0.137596	0.759	0.938	2.69828e-18
Chd2	1.23643e-22	-0.481842	0.391	0.522	2.70223e-18
Rbmxl1	1.2375e-22	-0.401744	0.505	0.626	2.70456e-18
Sdsl	1.24733e-22	-1.81649	0.031	0.142	2.72603e-18
Sept7	1.25607e-22	-0.13612	0.69	0.858	2.74515e-18
[truncated: 8,255 more rows]

## Sheet: filtered
Figure 5-Source Data 1. Differentially expressed genes between mature Gnao1 and mature Gnai2 neurons
Gnao1 enriched		Gnai2 enriched	|log2FC| >1 and adjusted p-value < 10E-6
Gene	p value	Avergae log2 Fold Change(Gnao1 vs Gnai2)	Fraction of cells expressing the gene in Gnao1 cluster	Fraction of cells expressing the gene in Gnai2 cluster	Adjusted p-value
Vmn2r1	0	7.36213	0.496	0.016	0
Tfap2e	0	7.31185	0.674	0.01	0
Sphkap	0	7.20901	0.497	0.007	0
Gnao1	0	6.90314	0.855	0.07	0
Cnpy1	0	6.821	0.871	0.065	0
Krt8	0	5.94567	0.836	0.118	0
Robo2	0	5.60876	0.63	0.014	0
Gchfr	0	4.70818	0.633	0.07	0
Tafa1	0	4.53026	0.631	0.081	0
Gm36028	0	4.30425	0.972	0.804	0
Mt3	0	3.81233	0.743	0.194	0
Agpat5	0	3.80908	0.863	0.507	0
Apmap	0	2.53528	0.912	0.9	0
Itm2b	0	2.22329	0.99	0.992	0
Manf	0	2.22243	0.936	0.969	0
Hspa5	0	2.14198	0.954	0.978	0
Calr4	0	1.96608	0.966	0.98	0
Stbd1	0	1.78836	0.979	0.987	0
Rps4x	0	-1.11195	0.898	0.993	0
Ckb	0	-1.67443	0.828	0.988	0
Plekhb1	0	-1.85612	0.626	0.973	0
Socs2	0	-1.93822	0.717	0.978	0
Gdpd1	0	-2.1127	0.442	0.947	0
Car2	0	-2.22593	0.609	0.97	0
Cystm1	0	-2.25137	0.752	0.984	0
Zdhhc3	0	-2.52168	0.324	0.89	0
Nrp2	0	-2.56378	0.245	0.922	0
Fam241a	0	-3.3963	0.338	0.972	0
Pcdh7	0	-3.68632	0.073	0.871	0
Nsg1	0	-3.83223	0.617	0.988	0
Gng13	0	-3.92186	0.425	0.985	0
Rtp1	0	-4.09634	0.122	0.966	0
Gng2	0	-4.30127	0.181	0.982	0
Gnai2	0	-4.70032	0.188	0.992	0
Meis2	0	-4.7635	0.127	0.986	0
Dner	2.74956e-307	-2.30142	0.242	0.878	6.00917e-303
Dnajc3	4.49715e-304	2.88312	0.891	0.817	9.82852e-300
Tppp3	2.2976e-301	6.09521	0.515	0.041	5.0214e-297
Pdia3	3.88796e-301	1.41716	0.972	0.988	8.49714e-297
S100a13	5.58388e-298	-1.88561	0.618	0.957	1.22036e-293
Vmn2r2	1.98432e-297	8.0916	0.464	0.022	4.33672e-293
Wscd2	2.3628e-291	8.06885	0.398	0.003	5.1639e-287
Tspan1	7.12313e-286	-3.22673	0.139	0.793	1.55676e-281
Prxl2a	2.28224e-281	-1.09318	0.854	0.985	4.98783e-277
Fbxo17	3.44131e-279	3.65434	0.695	0.184	7.52097e-275
Krt18	2.70228e-273	3.18768	0.847	0.621	5.90583e-269
Esd	4.4393e-272	-2.24222	0.351	0.875	9.7021e-268
Hsp90b1	5.27459e-270	1.49614	0.954	0.985	1.15276e-265
Shisa8	1.00878e-268	6.7702	0.385	0.006	2.20468e-264
Mgst3	8.72198e-266	-1.09822	0.807	0.98	1.90619e-261
Selenos	1.08431e-254	1.47719	0.915	0.972	2.36977e-250
B2m	1.29427e-253	2.71712	0.857	0.736	2.82863e-249
Pdia6	4.7034e-252	2.29253	0.908	0.917	1.02793e-247
Dpysl3	1.31831e-251	2.84275	0.804	0.451	2.88117e-247
H2bc21	4.81422e-251	-1.66379	0.65	0.943	1.05215e-246
Gcnt2	6.79791e-250	-2.41241	0.279	0.815	1.48568e-245
Sdf2l1	4.91037e-246	2.51614	0.872	0.87	1.07316e-241
Dio3	2.12174e-245	5.41464	0.387	0.015	4.63707e-241
Hmgn3	6.30245e-237	-1.1118	0.776	0.976	1.3774e-232
Vmn2r7	4.10718e-235	4.86812	0.568	0.116	8.97623e-231
Fam3c	4.45604e-233	2.34211	0.849	0.781	9.73867e-229
Qpct	9.76866e-233	-1.94142	0.338	0.845	2.13494e-228
Exosc7	3.32546e-228	-1.96787	0.389	0.836	7.26779e-224
Batf3	4.1112e-226	6.95501	0.323	0.004	8.98503e-222
Rhou	3.19865e-225	3.64033	0.464	0.051	6.99064e-221
Nfix	2.06416e-221	-3.73919	0.066	0.665	4.51122e-217
Chgb	7.3603e-218	-1.14675	0.574	0.943	1.60859e-213
Prdx2	9.78771e-217	1.72715	0.864	0.956	2.1391e-212
Fkbp2	3.30071e-216	1.44323	0.879	0.955	7.2137e-212
Osbpl9	1.69701e-211	2.18207	0.82	0.815	3.70881e-207
Prdx1	1.02353e-207	-1.33765	0.51	0.923	2.23693e-203
Cpsf6	2.40081e-207	-1.52533	0.579	0.908	5.24697e-203
Ap1ar	6.41847e-198	-1.52764	0.545	0.878	1.40276e-193
Lgals9	1.12896e-197	3.40127	0.453	0.063	2.46734e-193
Nfe2l2	4.59999e-197	-1.46205	0.554	0.893	1.00533e-192
Galnt18	9.72508e-197	2.68614	0.749	0.385	2.12542e-192
Vmn2r6	4.49243e-196	5.53085	0.446	0.071	9.81821e-192
Srp14	5.78053e-195	1.06866	0.856	0.976	1.26333e-190
Spcs2	7.7665e-194	1.43184	0.867	0.948	1.69737e-189
Gramd1c	6.45086e-193	-2.47112	0.222	0.724	1.40984e-188
Ppp1r1a	8.30376e-192	-1.10113	0.705	0.954	1.81479e-187
Fhit	7.57869e-190	3.18904	0.551	0.132	1.65632e-185
Srsf4	1.41663e-189	2.42088	0.746	0.428	3.09605e-185
Eml2	1.10594e-186	-5.01705	0.043	0.579	2.41703e-182
Tom1	1.15012e-182	-1.83798	0.304	0.789	2.5136e-178
Abca1	3.82191e-180	4.24999	0.334	0.024	8.35279e-176
Matn2	1.19948e-177	-3.54708	0.064	0.584	2.62147e-173
Cfap300	6.4679e-176	2.27094	0.773	0.595	1.41356e-171
Ugp2	4.96393e-175	2.33551	0.784	0.697	1.08487e-170
Gabrr2	1.14985e-174	7.63869	0.245	0.001	2.51299e-170
Optn	2.79631e-173	3.40881	0.394	0.049	6.11135e-169
Scgn	1.22138e-172	-1.3145	0.596	0.896	2.66933e-168
Vmn2r4	2.14906e-171	8.28219	0.281	0.012	4.69678e-167
Idi1	7.31013e-171	-1.65214	0.445	0.82	1.59763e-166
Creld2	3.39969e-170	2.87808	0.742	0.418	7.43002e-166
Fxyd6	2.05559e-168	-1.04981	0.694	0.95	4.49249e-164
Kcnk3	1.16458e-167	-1.64456	0.336	0.776	2.54518e-163
Nsmce3	2.80719e-167	-2.26366	0.247	0.701	6.1351e-163
Sult4a1	6.30854e-166	-1.03376	0.671	0.932	1.37873e-161
Ly6h	1.09433e-165	-1.29875	0.5	0.88	2.39165e-161
Mkrn2os	5.91327e-165	-2.80201	0.171	0.654	1.29235e-160
Calr	8.46331e-164	-1.64687	0.16	0.653	1.84966e-159
Prph	1.02136e-163	-4.66015	0.08	0.571	2.23218e-159
Fdps	7.36642e-163	-1.14892	0.724	0.953	1.60993e-158
Atp5g1	3.06124e-162	-1.8278	0.373	0.766	6.69033e-158
Ncam2	6.40193e-161	-2.1266	0.16	0.642	1.39914e-156
H2-M10.3	1.18185e-160	5.19808	0.349	0.044	2.58293e-156
Rasl11a	7.7988e-160	-2.32531	0.359	0.758	1.70443e-155
Mfap3l	6.35761e-159	3.08774	0.466	0.098	1.38946e-154
Cdk14	3.883e-158	-1.61049	0.4	0.788	8.4863e-154
Acbd7	2.35382e-157	1.09023	0.837	0.958	5.14427e-153
Rtp2	4.66002e-155	-1.04813	0.573	0.875	1.01845e-150
Trim35	5.17585e-152	-1.03742	0.644	0.92	1.13118e-147
Nav1	2.18003e-148	-1.2825	0.549	0.858	4.76446e-144
Dnajb11	2.23511e-148	1.25929	0.882	0.956	4.88484e-144
Pcyt2	3.90222e-146	-1.43747	0.452	0.79	8.5283e-142
Stmn4	4.94636e-146	-1.31645	0.723	0.962	1.08103e-141
Gramd1b	2.12213e-144	2.57751	0.423	0.081	4.63792e-140
Fetub	9.35627e-141	1.32146	0.98	0.989	2.04481e-136
Mfhas1	5.65444e-140	2.55586	0.53	0.156	1.23578e-135
Sp8	2.80177e-139	3.71968	0.256	0.016	6.12326e-135
Aldoc	7.74006e-139	-1.41687	0.414	0.779	1.69159e-134
Cdkn1b	2.33308e-137	-1.58647	0.441	0.777	5.09895e-133
Traf3ip3	2.92662e-137	5.31072	0.26	0.02	6.39612e-133
Dbi	4.84764e-135	1.44177	0.854	0.965	1.05945e-130
H2-M10.5	3.67011e-134	9.09419	0.304	0.028	8.02103e-130
Cldn9	9.19823e-134	-1.22523	0.427	0.788	2.01027e-129
Kctd1	3.11413e-132	2.03958	0.716	0.447	6.80592e-128
B4galt6	3.303e-132	4.01093	0.204	0.004	7.21871e-128
Slc9a3r1	1.00927e-131	-1.10718	0.556	0.868	2.20575e-127
Lingo2	3.70872e-131	-3.08581	0.043	0.469	8.1054e-127
Eya2	2.6932e-129	-1.78806	0.31	0.689	5.88599e-125
Plac8	1.82509e-128	1.75478	0.749	0.721	3.98874e-124
H2-M10.6	7.08658e-128	7.0033	0.235	0.015	1.54877e-123
Ctsz	1.8665e-127	-1.17899	0.457	0.8	4.07924e-123
Pof1b	2.31482e-127	-3.08974	0.062	0.484	5.05905e-123
H2ac6	1.52685e-126	2.40172	0.626	0.287	3.33694e-122
Jakmip1	3.74147e-126	-3.68845	0.037	0.455	8.17699e-122
Srsf6	4.57928e-126	-1.38708	0.307	0.679	1.0008e-121
Slc22a4	1.90198e-125	5.36285	0.198	0.005	4.15678e-121
Tmem132c	2.76833e-125	-1.82903	0.265	0.656	6.05018e-121
Celf4	1.54213e-123	-2.32027	0.173	0.581	3.37032e-119
Ssr4	2.69705e-123	1.07874	0.853	0.962	5.89439e-119
Pcp4l1	4.63036e-123	-1.59819	0.472	0.827	1.01197e-118
Sec11c	8.31692e-123	1.45278	0.803	0.87	1.81766e-118
Cspg5	1.91246e-122	3.09604	0.509	0.165	4.17968e-118
Got1	2.03704e-121	-1.20679	0.491	0.787	4.45196e-117
Dusp15	1.4986e-120	2.16513	0.626	0.281	3.27518e-116
Mmgt2	2.06819e-120	-1.11151	0.526	0.818	4.52003e-116
Chst1	2.60348e-118	1.83419	0.654	0.275	5.6899e-114
Doc2b	5.57041e-117	4.16269	0.255	0.027	1.21741e-112
Klhdc8a	6.15723e-117	2.95482	0.298	0.043	1.34566e-112
Mid1ip1	5.155e-116	-1.08438	0.57	0.838	1.12663e-111
Bcam	2.2927e-115	-2.866	0.06	0.451	5.0107e-111
H4c8	3.52941e-114	2.95109	0.448	0.133	7.71352e-110
Spcs3	3.78157e-114	1.64556	0.811	0.782	8.26461e-110
Tmed3	6.26907e-112	1.11618	0.85	0.947	1.37011e-107
Zdhhc12	2.0844e-110	-1.84047	0.168	0.544	4.55546e-106
Kcnk12	5.16882e-110	6.20048	0.159	0.001	1.12964e-105
Perp	5.2133e-110	-1.38016	0.343	0.708	1.13937e-105
Dap	5.40017e-110	2.39429	0.46	0.136	1.18021e-105
Homer2	7.2837e-108	1.92319	0.467	0.134	1.59185e-103
Ssbp4	9.34245e-107	-1.19155	0.497	0.783	2.04179e-102
Dock8	1.92494e-106	-1.5587	0.334	0.66	4.20695e-102
Ak7	2.10058e-106	4.35053	0.191	0.011	4.59081e-102
Pcf11	5.27987e-106	-1.21943	0.315	0.658	1.15391e-101
Id4	3.13997e-105	-3.68834	0.045	0.411	6.86241e-101
H2bu2	1.72117e-104	1.23702	0.795	0.888	3.76162e-100
BC052040	1.36283e-102	-2.26259	0.076	0.441	2.97847e-98
Fos	9.8373e-102	-1.112	0.511	0.806	2.14994e-97
Cenpm	1.56764e-101	4.49569	0.182	0.01	3.42607e-97
Hmgcs1	9.96704e-101	-1.56075	0.344	0.659	2.1783e-96
Dcdc2a	2.71288e-100	1.41849	0.773	0.741	5.929e-96
Atox1	6.56926e-100	2.32338	0.506	0.197	1.43571e-95
Trps1	2.55776e-98	2.24374	0.485	0.163	5.58997e-94
Tec	2.2241e-97	3.39828	0.224	0.026	4.86078e-93
B4galt4	2.70037e-97	-1.28763	0.311	0.657	5.90165e-93
Hpcal1	4.31494e-97	-1.03082	0.545	0.813	9.43031e-93
Pcsk1n	1.54792e-96	-1.69057	0.197	0.569	3.38297e-92
S100a10	1.69147e-96	-2.49175	0.132	0.487	3.69672e-92
Fam189a1	2.24627e-96	3.18155	0.288	0.052	4.90921e-92
Card19	5.38035e-95	-1.3313	0.375	0.675	1.17587e-90
Bri3bp	7.90974e-95	2.8291	0.333	0.076	1.72867e-90
Txlnb	9.35174e-93	4.15125	0.184	0.014	2.04382e-88
Rnf145	1.33563e-92	1.9018	0.736	0.533	2.91902e-88
H4c11	3.7989e-92	2.72115	0.319	0.071	8.3025e-88
Hs3st1	1.33912e-91	-2.62979	0.044	0.375	2.92665e-87
Rbbp6	3.36458e-90	1.56295	0.748	0.654	7.35329e-86
Smpd3	6.2367e-88	3.33317	0.183	0.016	1.36303e-83
Resp18	5.55698e-87	-1.34442	0.356	0.69	1.21448e-82
Cst6	6.19156e-86	1.22666	0.81	0.887	1.35317e-81
Vmp1	1.53552e-85	2.2653	0.738	0.59	3.35588e-81
Rgs3	5.01636e-84	-4.32691	0.031	0.338	1.09633e-79
Mfge8	6.49052e-84	1.36769	0.86	0.885	1.4185e-79
Carhsp1	7.32916e-84	2.17665	0.379	0.11	1.60179e-79
Cers2	3.7158e-83	-3.52187	0.035	0.342	8.12088e-79
Fam47e	4.64723e-83	2.27203	0.36	0.102	1.01565e-78
Sncg	4.8681e-83	7.20448	0.137	0.005	1.06392e-78
Mab21l1	6.58198e-83	-1.08879	0.509	0.752	1.43849e-78
Pcdh9	6.8595e-83	1.91594	0.695	0.438	1.49914e-78
Zcchc12	8.3932e-83	-1.28557	0.262	0.58	1.83433e-78
Lrrn3	6.03878e-82	-1.83283	0.175	0.496	1.31978e-77
Sema3e	3.71354e-81	-1.58282	0.069	0.384	8.11594e-77
St6gal1	4.61596e-81	-3.37092	0.027	0.327	1.00882e-76
Akr1b3	7.55521e-81	1.54755	0.746	0.684	1.65119e-76
Trp53rkb	1.07057e-80	-1.17891	0.409	0.69	2.33974e-76
Meis1	3.09417e-80	-2.30061	0.117	0.432	6.76231e-76
Casp3	4.34191e-80	-1.21939	0.499	0.771	9.48924e-76
Jup	5.6048e-80	-1.04098	0.48	0.727	1.22493e-75
Plk2	1.58512e-79	-2.42237	0.114	0.428	3.46428e-75
Syn2	3.94183e-79	-1.03423	0.499	0.74	8.61487e-75
Samd14	1.0424e-78	-1.35078	0.305	0.599	2.27818e-74
Ccdc184	1.18697e-78	-1.01477	0.465	0.733	2.59412e-74
Fermt2	1.3363e-78	-1.01472	0.409	0.678	2.92049e-74
Tmem184a	1.43976e-78	2.10167	0.413	0.142	3.14659e-74
Tspan18	3.23434e-78	-2.87144	0.099	0.406	7.06865e-74
Slc12a2	6.1495e-78	1.2554	0.865	0.919	1.34397e-73
Slc35b1	2.68086e-77	1.35199	0.789	0.806	5.85903e-73
Hivep2	4.73054e-77	-3.77595	0.037	0.329	1.03386e-72
Htra3	6.25611e-77	3.04812	0.258	0.053	1.36727e-72
Btg2	6.37448e-77	-1.56799	0.232	0.531	1.39314e-72
Guk1	2.55154e-76	1.04745	0.802	0.927	5.57639e-72
Insm1	5.62346e-76	-2.23536	0.101	0.404	1.22901e-71
Ergic2	6.50454e-76	1.0856	0.795	0.866	1.42157e-71
Pappa	9.11098e-76	-1.32992	0.264	0.553	1.99121e-71
Dut	2.45507e-75	1.1107	0.765	0.86	5.36555e-71
Spsb3	2.68643e-75	-1.04224	0.499	0.739	5.87118e-71
Isg20	2.92255e-75	2.20693	0.383	0.13	6.38724e-71
Dclk1	5.90021e-75	2.48318	0.361	0.11	1.28949e-70
Steap1	1.21086e-74	3.26856	0.278	0.069	2.64634e-70
Reps2	1.21457e-74	2.09082	0.499	0.209	2.65445e-70
Stom	2.65999e-74	1.11708	0.902	0.967	5.8134e-70
Crmp1	5.49022e-74	-1.06531	0.385	0.648	1.19989e-69
H2-M10.2	7.06566e-74	5.57313	0.127	0.005	1.5442e-69
Dph6	2.16462e-73	-1.08083	0.434	0.67	4.73078e-69
Ech1	4.12865e-73	-2.95629	0.049	0.334	9.02317e-69
Sil1	4.15495e-73	2.32114	0.599	0.338	9.08063e-69
Grin3a	5.23771e-73	5.65917	0.129	0.006	1.1447e-68
Srebf1	2.46878e-72	-1.40972	0.196	0.488	5.39553e-68
Gipc3	2.48357e-72	1.91324	0.488	0.209	5.42784e-68
Itga1	3.56606e-72	-1.46137	0.187	0.504	7.79363e-68
Mymk	2.65177e-71	6.45337	0.114	0.003	5.79543e-67
Klf2	6.7922e-71	2.59208	0.257	0.058	1.48444e-66
Phactr2	2.84531e-70	-3.27498	0.031	0.302	6.21842e-66
Fam129a	8.84408e-70	2.89675	0.217	0.04	1.93287e-65
Mmp28	3.38366e-69	5.92507	0.103	0.001	7.395e-65
Pdlim1	3.11326e-68	2.75067	0.185	0.028	6.80403e-64
Ly96	2.14501e-67	-1.22982	0.401	0.646	4.68792e-63
Rbm11	2.31887e-67	-1.38273	0.325	0.587	5.06788e-63
Mcub	4.62976e-67	-1.44869	0.256	0.533	1.01183e-62
Inka2	5.51794e-67	2.16118	0.269	0.067	1.20595e-62
Syt5	9.33206e-67	-1.14656	0.231	0.509	2.03952e-62
Pth2	1.45128e-65	-1.52981	0.282	0.546	3.17176e-61
H2-M10.4	4.30322e-65	9.04728	0.153	0.01	9.40468e-61
Cobl	4.64497e-65	-4.8657	0.015	0.262	1.01516e-60
Fhod3	7.92825e-65	2.92526	0.171	0.024	1.73272e-60
Prrg4	3.364e-64	-2.37435	0.07	0.336	7.35202e-60
Arhgap24	9.44727e-64	4.98086	0.105	0.004	2.0647e-59
Gm4847	2.23853e-63	5.55438	0.099	0.002	4.8923e-59
Sec14l5	2.36532e-63	-1.31316	0.235	0.501	5.16941e-59
Dhcr24	1.14284e-62	-1.05864	0.252	0.518	2.49767e-58
Bhlhe40	2.51927e-62	-1.2338	0.315	0.578	5.50586e-58
Rp2	1.67059e-61	-1.48479	0.205	0.466	3.65108e-57
Slc8a1	3.35252e-61	-1.07609	0.152	0.433	7.32693e-57
Galm	3.7669e-61	3.38536	0.2	0.04	8.23257e-57
C77080	4.96003e-61	-2.04846	0.119	0.384	1.08402e-56
Eno2	6.53499e-61	-1.9161	0.159	0.421	1.42822e-56
Stxbp6	7.02346e-61	2.30923	0.171	0.027	1.53498e-56
Ccdc136	1.36475e-60	2.01855	0.452	0.203	2.98266e-56
Galnt16	2.40502e-60	5.31906	0.105	0.005	5.25617e-56
Lrrc42	8.48815e-60	-1.65304	0.195	0.446	1.85509e-55
Cd200	1.21964e-59	-4.32721	0.03	0.265	2.66552e-55
Cyp1b1	3.57567e-59	3.44636	0.129	0.012	7.81464e-55
Pomgnt1	6.57125e-59	-1.1324	0.378	0.596	1.43615e-54
Ppp1r42	1.49185e-58	-1.73797	0.17	0.426	3.26044e-54
Pde11a	9.18106e-58	1.78141	0.214	0.048	2.00652e-53
Tsen34	1.49705e-57	-1.06595	0.324	0.566	3.27181e-53
Vmn2r3	1.84255e-57	3.2008	0.295	0.104	4.02689e-53
Racgap1	3.86093e-57	1.35184	0.693	0.54	8.43806e-53
Dcx	4.10673e-57	-1.37355	0.163	0.426	8.97525e-53
Stard4	7.88475e-57	-1.89963	0.08	0.325	1.72321e-52
Ifngr1	9.41784e-57	-1.77368	0.056	0.297	2.05827e-52
Nucb2	1.04079e-56	1.88628	0.69	0.559	2.27464e-52
Plekhb2	1.24523e-56	-1.39642	0.251	0.495	2.72146e-52
Tcp11	1.31224e-56	3.7234	0.13	0.014	2.8679e-52
Stt3b	2.23954e-56	1.64639	0.686	0.489	4.89451e-52
1810062G17Rik	2.91609e-56	2.03845	0.269	0.077	6.37311e-52
5730409E04Rik	3.83549e-56	3.05253	0.141	0.018	8.38246e-52
Kantr	4.61752e-56	-1.02752	0.338	0.57	1.00916e-51
Etv5	6.90956e-56	-2.12562	0.106	0.355	1.51008e-51
Elovl7	1.09748e-55	-1.31653	0.156	0.404	2.39855e-51
H4c1	3.54575e-55	3.1911	0.145	0.02	7.74925e-51
Aen	4.70787e-55	1.47111	0.662	0.511	1.02891e-50
Gsn	5.66272e-55	-1.22447	0.292	0.524	1.23759e-50
Gyg	6.21641e-55	1.23251	0.699	0.584	1.3586e-50
Nqo1	7.23981e-55	-2.22523	0.161	0.404	1.58226e-50
Tmem47	1.47477e-54	-1.191	0.189	0.432	3.2231e-50
Rnaseh2a	2.23784e-54	1.64305	0.516	0.273	4.8908e-50
Tspan12	4.22238e-54	-1.10894	0.14	0.398	9.22802e-50
Tmx3	5.92114e-54	1.32415	0.853	0.895	1.29406e-49
Med13l	8.00776e-54	-1.44894	0.296	0.522	1.7501e-49
Ccne1	1.42307e-53	3.43471	0.134	0.017	3.11011e-49
Hopx	1.46014e-53	-2.14212	0.089	0.33	3.19113e-49
Tmem183a	2.20808e-53	-4.28211	0.02	0.232	4.82576e-49
Trim47	2.97519e-53	4.6211	0.092	0.004	6.50227e-49
Ptpn13	3.66249e-53	4.45326	0.087	0.003	8.00438e-49
Rab12	4.52686e-53	-1.87379	0.163	0.401	9.89346e-49
Rtp4	9.96233e-53	-1.47537	0.106	0.348	2.17727e-48
Klhl13	1.70857e-52	1.92221	0.271	0.084	3.73409e-48
Minar1	2.36667e-52	-4.50724	0.019	0.227	5.17235e-48
Traf4	1.00741e-51	-1.61442	0.2	0.431	2.2017e-47
Plxnd1	1.61819e-51	2.96053	0.086	0.003	3.53655e-47
Slc4a4	1.89026e-51	-2.54453	0.022	0.23	4.13117e-47
Ivns1abp	2.80465e-51	1.01751	0.76	0.776	6.12957e-47
Glul	2.81013e-51	-1.37645	0.285	0.507	6.14154e-47
Lurap1	3.37989e-51	-1.23812	0.229	0.462	7.38675e-47
Sobp	4.87585e-51	-1.18181	0.235	0.471	1.06562e-46
Smad1	6.87318e-51	-1.64162	0.209	0.441	1.50213e-46
Hsph1	1.5332e-50	-2.86028	0.07	0.29	3.35081e-46
Galnt17	3.08736e-50	-4.7293	0.015	0.214	6.74742e-46
Ggt5	1.30087e-49	-1.92491	0.052	0.272	2.84306e-45
Cd247	1.54463e-49	2.8837	0.224	0.063	3.3758e-45
Dzip1	2.57502e-49	3.20182	0.138	0.021	5.6277e-45
Cat	7.92316e-49	-1.36345	0.188	0.413	1.73161e-44
Cpn1	9.30649e-49	1.64621	0.638	0.488	2.03393e-44
Rit2	1.03745e-48	-4.6139	0.01	0.203	2.26734e-44
Slc7a11	2.39965e-48	3.70973	0.133	0.02	5.24444e-44
Tpst1	2.47324e-48	1.68083	0.374	0.158	5.40527e-44
Arhgef15	2.81299e-48	5.91811	0.073	0.001	6.14778e-44
Plscr2	3.44247e-48	3.92329	0.145	0.026	7.52352e-44
Diaph2	4.2789e-48	-1.09443	0.22	0.453	9.35154e-44
Pygl	4.56267e-48	1.57747	0.367	0.152	9.97171e-44
Gpx1	1.42005e-47	-1.23266	0.203	0.433	3.10352e-43
Podxl	2.49564e-47	2.65575	0.306	0.111	5.45421e-43
Sec13	2.50647e-47	1.21032	0.622	0.434	5.47789e-43
Fam169b	3.60727e-47	2.69644	0.162	0.033	7.88369e-43
Canx	4.61521e-47	1.51658	0.835	0.841	1.00865e-42
Hspb1	1.02697e-46	1.7467	0.541	0.334	2.24444e-42
Pfkp	2.71299e-46	-2.08201	0.087	0.302	5.92925e-42
Ier5	3.30767e-46	-2.80259	0.047	0.25	7.22892e-42
Bfsp2	4.36738e-46	-3.02867	0.093	0.306	9.54492e-42
Rpn1	7.30998e-46	1.19422	0.855	0.909	1.5976e-41
Cox7a1	1.59816e-45	-2.10484	0.121	0.336	3.49277e-41
N4bp2l1	2.14135e-45	-1.13065	0.229	0.446	4.67991e-41
Clmp	2.31656e-45	5.58459	0.078	0.004	5.06284e-41
5031439G07Rik	2.81235e-45	-1.01033	0.331	0.541	6.14639e-41
Ahnak2	2.87946e-45	2.36099	0.25	0.082	6.29306e-41
Kctd7	3.5487e-45	1.43205	0.576	0.358	7.75568e-41
Rbms3	3.81035e-45	-1.03051	0.247	0.466	8.32753e-41
Ankrd44	3.99905e-45	-1.06093	0.129	0.348	8.73993e-41
Rab3b	8.31707e-45	1.26197	0.629	0.44	1.8177e-40
Sgtb	3.75581e-44	1.66377	0.336	0.135	8.20831e-40
Fndc3b	4.82048e-44	-1.49251	0.101	0.312	1.05351e-39
Nptxr	5.69185e-44	-1.54182	0.139	0.353	1.24395e-39
Slk	5.95701e-44	-1.78613	0.099	0.304	1.3019e-39
Slc35f3	7.73286e-44	4.26478	0.076	0.004	1.69002e-39
Kctd8	7.88378e-44	-3.63783	0.021	0.204	1.723e-39
Phactr3	8.61493e-44	-2.21156	0.069	0.271	1.88279e-39
Myof	1.0134e-43	-4.54415	0.016	0.193	2.21478e-39
Klhl8	1.41074e-43	-1.06744	0.32	0.516	3.08317e-39
Fuom	1.50666e-43	-1.57797	0.092	0.3	3.2928e-39
H2-M10.1	1.6101e-43	8.60484	0.115	0.01	3.51887e-39
Parvb	2.07032e-43	-2.75196	0.026	0.208	4.52469e-39
Ddost	4.28142e-43	1.04501	0.839	0.922	9.35703e-39
Sec16b	5.06241e-43	2.53238	0.172	0.041	1.10639e-38
Stard5	5.96287e-43	1.79915	0.325	0.133	1.30318e-38
Pdzrn3	6.60927e-43	3.0363	0.141	0.028	1.44445e-38
Efnb1	6.72776e-43	1.76953	0.142	0.028	1.47035e-38
Ppargc1a	1.68817e-42	-1.74289	0.084	0.286	3.68949e-38
Pcdh10	2.14983e-42	-1.43064	0.251	0.47	4.69845e-38
Etl4	2.54203e-42	-1.26797	0.219	0.419	5.5556e-38
Edem1	2.66413e-42	1.93823	0.497	0.288	5.82246e-38
Ostc	3.16974e-42	1.10323	0.767	0.809	6.92746e-38
1500009C09Rik	5.48955e-42	5.82524	0.061	0.001	1.19974e-37
Mapk4	5.55202e-42	-1.26307	0.224	0.431	1.21339e-37
Ar	5.63291e-42	3.62256	0.098	0.012	1.23107e-37
Actl6b	1.36059e-41	-1.14891	0.283	0.492	2.97357e-37
Zfp365	2.8078e-41	2.21435	0.229	0.075	6.13646e-37
Ephx1	3.11484e-41	1.97427	0.489	0.273	6.80749e-37
Acat2	3.76497e-41	-1.60492	0.151	0.355	8.22833e-37
Iqck	4.09879e-41	-1.49351	0.192	0.396	8.95792e-37
Slc3a2	4.67495e-41	1.13564	0.82	0.886	1.02171e-36
Dgkg	4.90804e-41	2.10882	0.198	0.056	1.07265e-36
Abo	5.30705e-41	1.40662	0.7	0.602	1.15986e-36
Gm3417	5.65611e-41	1.35897	0.285	0.107	1.23614e-36
Tubb4a	7.67642e-41	-2.77329	0.055	0.241	1.67768e-36
Phlda3	9.31198e-41	1.66186	0.202	0.06	2.03513e-36
Tanc1	2.32832e-40	-1.45606	0.148	0.35	5.08853e-36
Nfkbia	3.26656e-40	-1.07202	0.352	0.535	7.13907e-36
Pcsk2	1.08652e-39	-2.4153	0.06	0.249	2.37459e-35
Spred1	2.60861e-39	-1.20388	0.068	0.26	5.70112e-35
Golim4	3.62942e-39	1.51639	0.675	0.536	7.9321e-35
Kcnn2	4.59841e-39	-3.24705	0.03	0.201	1.00498e-34
Lbh	1.05701e-38	-2.15025	0.102	0.297	2.31009e-34
Ormdl3	1.23447e-38	-1.10214	0.227	0.423	2.69794e-34
Rab3c	1.4213e-38	2.75007	0.493	0.349	3.10625e-34
Asphd2	1.56133e-38	2.62456	0.115	0.019	3.41228e-34
Mitf	2.12213e-38	-3.2353	0.029	0.197	4.63791e-34
Tgfb1	2.64419e-38	2.21947	0.162	0.04	5.77888e-34
Rab27b	3.10853e-38	4.1231	0.087	0.009	6.79369e-34
Kcnab2	3.15972e-38	-1.60289	0.136	0.33	6.90557e-34
Pcbp3	3.56193e-38	-1.27262	0.193	0.389	7.78459e-34
Snx21	3.98745e-38	-1.15756	0.296	0.479	8.71456e-34
Acadl	4.8522e-38	-3.12786	0.034	0.202	1.06045e-33
Csmd1	6.60517e-38	-5.14029	0.009	0.162	1.44356e-33
Epb41	1.04104e-37	1.46097	0.336	0.148	2.27519e-33
Ttc39a	1.17291e-37	-2.05876	0.078	0.259	2.5634e-33
Tub	1.27868e-37	-1.0407	0.255	0.451	2.79455e-33
Efnb3	1.35432e-37	3.71522	0.126	0.025	2.95987e-33
Vmn2r42	1.7916e-37	10.32	0.084	0.006	3.91555e-33
Cnn3	1.81273e-37	-1.16686	0.251	0.441	3.96172e-33
Cmtm4	2.02889e-37	1.03762	0.769	0.789	4.43414e-33
H4c9	2.39457e-37	1.68327	0.294	0.123	5.23333e-33
Mbl2	2.46322e-37	-1.07109	0.215	0.438	5.38337e-33
Tmem38b	2.69347e-37	1.36382	0.501	0.291	5.88658e-33
Nlgn3	2.69891e-37	-1.09342	0.052	0.228	5.89846e-33
Dsp	2.73311e-37	1.43879	0.288	0.114	5.97321e-33
Hyou1	3.63011e-37	1.73945	0.602	0.424	7.9336e-33
Rtkn	3.68431e-37	-2.2336	0.047	0.221	8.05205e-33
Irf9	4.11133e-37	-1.33205	0.232	0.422	8.98531e-33
Fgd2	4.92197e-37	-2.68236	0.065	0.24	1.0757e-32
Magt1	5.36569e-37	1.60274	0.577	0.37	1.17267e-32
Slc38a1	5.47551e-37	1.10878	0.716	0.646	1.19667e-32
Cers4	1.05789e-36	-3.37699	0.034	0.196	2.31202e-32
Edem2	1.42829e-36	1.55244	0.571	0.385	3.12152e-32
Cacnb4	1.44772e-36	1.55467	0.393	0.203	3.16399e-32
Rnd2	1.55515e-36	1.2584	0.517	0.317	3.39878e-32
Vmn2r22	1.58972e-36	10.3809	0.053	0.001	3.47433e-32
Fads6	1.90046e-36	-1.44991	0.087	0.269	4.15346e-32
Rassf3	2.4172e-36	-1.04538	0.275	0.464	5.28279e-32
Ankrd29	2.54898e-36	-2.65662	0.011	0.161	5.57079e-32
Ift172	4.23381e-36	1.86912	0.487	0.314	9.25299e-32
Pde1a	1.21501e-35	-3.32579	0.034	0.193	2.6554e-31
Vcl	1.29024e-35	-1.30835	0.184	0.373	2.81983e-31
H2bc6	1.32312e-35	1.62215	0.32	0.145	2.89167e-31
Ugdh	1.39141e-35	-3.29685	0.028	0.185	3.04093e-31
Snx24	1.67694e-35	-3.85975	0.019	0.17	3.66496e-31
Hs3st6	1.70106e-35	1.61562	0.334	0.151	3.71766e-31
Slc15a4	2.18822e-35	1.74886	0.326	0.146	4.78237e-31
Celf2	2.87585e-35	-2.65494	0.049	0.215	6.28517e-31
Krt72	3.01047e-35	1.33758	0.446	0.258	6.57938e-31
Jph4	4.52558e-35	-3.22126	0.024	0.177	9.89065e-31
Serpinb1a	6.45482e-35	3.7361	0.091	0.013	1.4107e-30
Vmn2r5	6.65152e-35	8.15345	0.06	0.003	1.45369e-30
Maff	8.56266e-35	-2.27188	0.075	0.247	1.87137e-30
Gm5617	1.41398e-34	1.12522	0.666	0.56	3.09026e-30
H4c6	1.4312e-34	3.93922	0.061	0.003	3.12788e-30
Pwwp2b	2.48709e-34	-1.12333	0.117	0.297	5.43553e-30
Tmem91	2.63515e-34	2.06966	0.166	0.047	5.75912e-30
Adam23	2.88522e-34	1.82584	0.355	0.171	6.30565e-30
Tmem65	4.43135e-34	1.14429	0.585	0.422	9.6847e-30
A730046J19Rik	4.61047e-34	-2.69474	0.014	0.158	1.00762e-29
Gamt	5.82569e-34	1.2305	0.59	0.429	1.27321e-29
Hcn1	6.17748e-34	-1.41231	0.117	0.299	1.35009e-29
mt-Nd4l	8.68042e-34	1.05746	0.811	0.858	1.89711e-29
Cacng5	8.74281e-34	2.159	0.27	0.112	1.91074e-29
Dnajb9	8.84356e-34	1.22456	0.774	0.814	1.93276e-29
Npnt	9.11584e-34	2.88158	0.081	0.01	1.99227e-29
Coro6	1.13541e-33	-1.54699	0.175	0.358	2.48143e-29
Syt16	1.2655e-33	-2.07874	0.03	0.183	2.76575e-29
Map4	1.53414e-33	-1.44677	0.074	0.245	3.35287e-29
Crabp1	1.98594e-33	-1.17518	0.045	0.208	4.34028e-29
Derl3	2.34837e-33	6.08283	0.05	0.001	5.13237e-29
Pbx2	4.13217e-33	1.27569	0.405	0.213	9.03087e-29
Osbpl3	4.1927e-33	-1.01784	0.203	0.386	9.16314e-29
Cdh22	4.26926e-33	2.37681	0.118	0.025	9.33047e-29
Sorbs1	6.09021e-33	1.97784	0.207	0.072	1.33101e-28
P2rx5	7.08778e-33	-2.11924	0.045	0.201	1.54903e-28
Pdlim7	7.58238e-33	-1.90363	0.112	0.281	1.65713e-28
Itgb6	8.37278e-33	2.18372	0.197	0.067	1.82987e-28
9530077C05Rik	1.1212e-32	1.09566	0.555	0.367	2.45038e-28
Tmem158	2.44843e-32	1.70141	0.313	0.145	5.35105e-28
Cgnl1	5.02272e-32	2.62595	0.084	0.012	1.09771e-27
Stk38l	5.5834e-32	-1.2878	0.15	0.324	1.22025e-27
D430019H16Rik	5.76429e-32	2.09263	0.117	0.025	1.25979e-27
Mtf2	1.10029e-31	-1.05975	0.198	0.367	2.40469e-27
Ier2	1.77656e-31	-1.23358	0.136	0.31	3.88267e-27
Timp2	1.96944e-31	-1.37369	0.043	0.193	4.3042e-27
Irak3	1.99844e-31	1.44449	0.383	0.199	4.36759e-27
Fstl1	2.82431e-31	1.46863	0.065	0.006	6.17252e-27
Vmn2r30	3.07818e-31	9.6918	0.072	0.002	6.72735e-27
Aff3	3.16906e-31	-1.1545	0.111	0.277	6.92599e-27
Ublcp1	3.96504e-31	1.16881	0.62	0.485	8.66559e-27
Sema7a	4.53493e-31	-1.50386	0.092	0.261	9.9111e-27
Erlin1	4.73174e-31	1.59603	0.386	0.209	1.03412e-26
Ltbp2	4.88197e-31	6.11116	0.048	0.001	1.06695e-26
Derl1	9.74729e-31	1.49672	0.633	0.481	2.13027e-26
E030030I06Rik	1.21532e-30	-2.63947	0.034	0.178	2.65609e-26
Igll1	1.38926e-30	3.87033	0.07	0.008	3.03623e-26
Asb5	1.54249e-30	2.93493	0.068	0.007	3.37111e-26
Prkacb	1.7341e-30	-1.12589	0.204	0.373	3.78988e-26
Ydjc	1.83417e-30	1.64317	0.253	0.105	4.00858e-26
Caly	2.14905e-30	-2.0118	0.02	0.154	4.69675e-26
Nav3	2.15257e-30	-1.49374	0.136	0.307	4.70443e-26
Chrna10	2.89703e-30	1.58448	0.471	0.288	6.33146e-26
Psmb8	3.23299e-30	1.55386	0.2	0.071	7.06569e-26
Pdk1	3.24924e-30	-1.0668	0.226	0.394	7.1012e-26
Cstf2t	4.29597e-30	-2.13949	0.095	0.252	9.38884e-26
Agbl2	5.03183e-30	3.21332	0.062	0.005	1.09971e-25
Slc16a6	5.41122e-30	-2.04714	0.022	0.156	1.18262e-25
Msh3	7.64043e-30	1.47841	0.321	0.15	1.66982e-25
Prcp	9.65792e-30	-1.42616	0.101	0.262	2.11074e-25
Txnrd3	1.37786e-29	-1.20831	0.228	0.392	3.0113e-25
Usp18	2.34818e-29	-2.19104	0.04	0.182	5.13194e-25
Pcsk1	2.54745e-29	-1.33153	0.106	0.268	5.56746e-25
Pdia5	2.78406e-29	1.81812	0.473	0.279	6.08456e-25
Dand5	4.6634e-29	-1.22353	0.126	0.289	1.01919e-24
Ldlrap1	5.61986e-29	2.0925	0.174	0.058	1.22822e-24
Abcg1	7.38398e-29	1.39091	0.466	0.276	1.61377e-24
Slc9a3r2	8.00235e-29	-3.99506	0.013	0.136	1.74891e-24
Ostf1	9.27808e-29	-1.05757	0.217	0.378	2.02773e-24
Vmn2r36	9.90887e-29	6.17067	0.063	0.003	2.16558e-24
Pknox1	1.33509e-28	-1.24797	0.186	0.347	2.91784e-24
Npepl1	2.04316e-28	-1.20177	0.167	0.333	4.46533e-24
Marveld3	3.10836e-28	2.17879	0.062	0.006	6.79332e-24
Cyb5r2	4.55594e-28	-3.13107	0.011	0.13	9.95701e-24
Pif1	5.63363e-28	1.29503	0.309	0.15	1.23123e-23
Faah	5.67753e-28	-1.06493	0.132	0.291	1.24083e-23
Osbpl8	6.03377e-28	1.0424	0.682	0.601	1.31868e-23
Lingo1	6.20594e-28	-1.75721	0.029	0.16	1.35631e-23
Gm12216	6.72534e-28	3.07669	0.099	0.021	1.46982e-23
H1f10	7.92263e-28	1.12505	0.461	0.281	1.73149e-23
Pak6	7.97192e-28	-1.00885	0.144	0.308	1.74226e-23
Adamts18	8.94785e-28	2.47745	0.169	0.057	1.95555e-23
Spsb4	9.62135e-28	2.28704	0.071	0.01	2.10275e-23
Ptrh2	1.00851e-27	1.40047	0.473	0.311	2.2041e-23
S100a5	1.197e-27	-4.3816	0.038	0.189	2.61604e-23
Fkbp1b	1.42808e-27	4.02056	0.06	0.006	3.12107e-23
Abracl	1.67246e-27	-1.33087	0.244	0.401	3.65515e-23
Inpp1	1.82891e-27	-1.10812	0.164	0.322	3.99708e-23
Sacs	2.80045e-27	-1.51293	0.092	0.243	6.12038e-23
Tmod3	2.95175e-27	1.15714	0.433	0.25	6.45106e-23
Smpdl3a	2.95331e-27	-3.29063	0.044	0.176	6.45446e-23
Ccdc192	2.98738e-27	2.5054	0.087	0.016	6.52893e-23
Mab21l2	3.29184e-27	3.78415	0.051	0.004	7.19432e-23
Pde7b	5.20004e-27	-2.27818	0.043	0.175	1.13647e-22
Csdc2	5.69104e-27	1.3604	0.466	0.283	1.24378e-22
Cgref1	8.23806e-27	1.04758	0.584	0.426	1.80043e-22
Plxdc2	1.18293e-26	1.70091	0.166	0.057	2.58529e-22
Sft2d2	1.34634e-26	1.01495	0.712	0.663	2.94242e-22
Chst11	1.60275e-26	-1.27986	0.069	0.212	3.50281e-22
Tmem248	1.6768e-26	1.36163	0.38	0.214	3.66465e-22
Lgi1	1.67959e-26	1.14519	0.424	0.248	3.67075e-22
Ctbp2	2.72801e-26	-1.0453	0.045	0.179	5.96207e-22
Suclg2	2.83573e-26	-1.05924	0.058	0.196	6.19748e-22
Ahsg	4.01556e-26	4.96475	0.039	0.001	8.776e-22
Calcoco2	4.15772e-26	1.11712	0.418	0.244	9.0867e-22
Zfp704	4.47496e-26	-1.00506	0.158	0.313	9.78003e-22
Fads1	4.6555e-26	-2.33491	0.06	0.197	1.01746e-21
H2ac18	4.96108e-26	1.16229	0.328	0.165	1.08424e-21
Spsb1	5.16365e-26	-2.24462	0.064	0.2	1.12852e-21
Ago1	7.42533e-26	2.51315	0.089	0.018	1.62281e-21
Iqcb1	8.12115e-26	-1.16947	0.221	0.37	1.77488e-21
1110059E24Rik	8.64648e-26	-1.5339	0.094	0.236	1.88969e-21
Ikzf4	8.86482e-26	1.1452	0.489	0.321	1.93741e-21
Lrrn2	9.1378e-26	1.58554	0.4	0.23	1.99707e-21
Tbc1d10c	1.08649e-25	-1.50463	0.099	0.243	2.37452e-21
Tmem71	1.25356e-25	3.79099	0.054	0.005	2.73966e-21
Unc80	1.515e-25	-1.62384	0.064	0.203	3.31102e-21
Cacna2d3	2.02805e-25	-2.61079	0.022	0.139	4.4323e-21
Scube3	2.11142e-25	2.61583	0.066	0.009	4.61451e-21
Mboat1	2.22249e-25	-3.63591	0.018	0.132	4.85725e-21
Retsat	2.2766e-25	2.7173	0.094	0.021	4.97552e-21
Limd1	2.58914e-25	-1.25442	0.115	0.263	5.65856e-21
Pllp	2.72527e-25	-3.94517	0.017	0.129	5.95607e-21
Zcchc3	3.39867e-25	-1.22709	0.17	0.318	7.42779e-21
Taf7l	4.05857e-25	5.61111	0.036	0	8.87001e-21
Cyp4x1	4.20583e-25	-1.09873	0.09	0.235	9.19183e-21
Ggt7	4.24824e-25	-1.05878	0.049	0.179	9.28452e-21
Sesn3	4.31145e-25	1.13492	0.333	0.173	9.42267e-21
Rasgrp4	7.06044e-25	-2.78199	0.038	0.161	1.54306e-20
Metrnl	8.02996e-25	-3.79958	0.015	0.124	1.75495e-20
Cdkn1c	8.34476e-25	-1.22947	0.557	0.648	1.82375e-20
Sgms1	8.37676e-25	2.87202	0.095	0.022	1.83074e-20
Dusp1	9.16119e-25	-1.15044	0.196	0.346	2.00218e-20
Fbxo44	9.68245e-25	-1.09665	0.053	0.181	2.1161e-20
Tcf15	1.06711e-24	-4.07977	0.007	0.11	2.33217e-20
Tmem240	1.11223e-24	-1.1542	0.22	0.368	2.43077e-20
Pgpep1l	1.1775e-24	2.52001	0.068	0.011	2.57343e-20
Cacna1a	1.40632e-24	-3.73615	0.016	0.125	3.07352e-20
Ndfip1	1.6664e-24	-1.08105	0.106	0.251	3.64192e-20
Chl1	1.69168e-24	-2.14478	0.011	0.116	3.69716e-20
Wnt16	1.72243e-24	2.16577	0.042	0.002	3.76437e-20
Dhcr7	2.43255e-24	-1.37702	0.068	0.202	5.31633e-20
Eif2ak2	2.57951e-24	-1.2175	0.205	0.35	5.63752e-20
Mlec	2.60493e-24	1.12751	0.495	0.328	5.69308e-20
Nln	3.78e-24	1.45131	0.227	0.099	8.26118e-20
Crip2	3.92409e-24	-1.47179	0.141	0.287	8.5761e-20
F8	4.60002e-24	2.05351	0.261	0.13	1.00533e-19
Mettl1	5.30304e-24	1.28517	0.362	0.205	1.15898e-19
Xbp1	5.96733e-24	1.02247	0.697	0.648	1.30416e-19
Foxo3	7.83614e-24	-1.05248	0.175	0.321	1.71259e-19
Flnc	8.66987e-24	4.79496	0.037	0.001	1.8948e-19
Stk32c	1.04326e-23	1.43414	0.137	0.045	2.28005e-19
Eva1c	1.05214e-23	-3.63002	0.014	0.118	2.29946e-19
Rprd1a	1.28127e-23	-1.22214	0.179	0.324	2.80022e-19
Csrp1	1.34017e-23	1.44473	0.129	0.04	2.92894e-19
Nppc	1.67895e-23	1.58542	0.2	0.084	3.66935e-19
Cib2	1.86016e-23	-3.09449	0.023	0.132	4.06538e-19
Cited4	1.99075e-23	1.5315	0.165	0.062	4.35077e-19
Anxa6	2.00136e-23	-1.366	0.107	0.245	4.37397e-19
H2-DMb2	2.00908e-23	-1.1835	0.107	0.243	4.39085e-19
Cfap206	2.04111e-23	-2.34592	0.039	0.157	4.46084e-19
Zfp444	2.52991e-23	-1.08027	0.221	0.365	5.52911e-19
Sh2d5	2.85163e-23	-1.41805	0.103	0.239	6.23224e-19
Ptchd1	3.48225e-23	-3.4841	0.01	0.11	7.61047e-19
Fam169a	5.07734e-23	-1.01234	0.195	0.337	1.10965e-18
Gast	6.31384e-23	4.12147	0.042	0.003	1.37989e-18
Hsd17b7	6.72711e-23	-1.01192	0.158	0.296	1.47021e-18
Car11	7.42386e-23	-1.18479	0.114	0.252	1.62248e-18
Lrrc8d	8.22716e-23	3.64322	0.063	0.01	1.79805e-18
H3c7	8.6202e-23	2.06794	0.068	0.012	1.88395e-18
Adgra1	9.12494e-23	6.59938	0.031	0	1.99426e-18
Kcnq1	1.04387e-22	3.8165	0.067	0.012	2.28139e-18
Taf15	1.07158e-22	1.06736	0.684	0.643	2.34194e-18
Ptk2b	1.21441e-22	-2.35404	0.059	0.184	2.65408e-18
Rgcc	1.2198e-22	2.82061	0.073	0.014	2.66588e-18
Sdsl	1.24733e-22	-1.81649	0.031	0.142	2.72603e-18
Ppard	1.44683e-22	-1.44761	0.07	0.195	3.16205e-18
Acsf2	1.47084e-22	1.81574	0.075	0.015	3.21453e-18
Oasl2	1.4999e-22	-1.15399	0.069	0.196	3.27802e-18
Atp2a2	1.50413e-22	1.05137	0.826	0.886	3.28729e-18
Gucy1b2	1.92236e-22	-4.01867	0.009	0.105	4.20133e-18
Il34	1.92549e-22	2.40676	0.064	0.011	4.20816e-18
Arhgef19	2.26185e-22	-1.93974	0.042	0.156	4.94327e-18
Atf6b	2.33747e-22	1.08699	0.66	0.556	5.10854e-18
Utrn	2.36369e-22	1.34359	0.278	0.138	5.16584e-18
Rnf112	3.09787e-22	-2.57385	0.019	0.121	6.77039e-18
Cabcoco1	3.10524e-22	-2.20614	0.056	0.177	6.78651e-18
Tent5a	4.36353e-22	-1.62748	0.029	0.137	9.5365e-18
Abhd17b	4.48342e-22	-1.35343	0.107	0.236	9.79851e-18
Gm5148	4.89914e-22	-1.58677	0.083	0.213	1.07071e-17
Arxes1	5.89102e-22	3.26595	0.05	0.006	1.28748e-17
Inha	6.1637e-22	-1.33878	0.028	0.135	1.34708e-17
Ica1l	6.25517e-22	-1.25457	0.086	0.214	1.36707e-17
Syt9	6.46284e-22	-1.59135	0.032	0.142	1.41245e-17
Rsad2	7.108e-22	-2.4826	0.038	0.149	1.55345e-17
Sh3d21	7.2369e-22	1.38782	0.2	0.087	1.58162e-17
Erp44	7.51868e-22	1.22151	0.716	0.681	1.64321e-17
Derl2	9.42539e-22	1.23773	0.586	0.446	2.05992e-17
Suox	1.17244e-21	1.19723	0.466	0.308	2.56236e-17
Hid1	1.72061e-21	1.24989	0.464	0.305	3.7604e-17
Ficd	1.81836e-21	1.4541	0.415	0.254	3.97402e-17
Usp20	2.04826e-21	-3.65685	0.015	0.111	4.47648e-17
Car8	2.46683e-21	2.49323	0.032	0.001	5.39126e-17
Slc6a17	2.69749e-21	-1.22872	0.152	0.286	5.89536e-17
Gstm7	2.87037e-21	2.48358	0.049	0.006	6.2732e-17
Il13ra1	2.9006e-21	-1.34377	0.066	0.186	6.33926e-17
H4c3	3.23805e-21	1.83254	0.116	0.036	7.07677e-17
Scap	3.32473e-21	1.06935	0.769	0.786	7.2662e-17
Rpn2	4.10714e-21	1.22578	0.788	0.833	8.97616e-17
Cfap52	4.63729e-21	-3.52649	0.015	0.11	1.01348e-16
Rell1	5.72815e-21	-2.6503	0.024	0.124	1.25189e-16
Dusp27	6.08285e-21	-4.6851	0.007	0.095	1.32941e-16
Lman1	6.17138e-21	1.51782	0.572	0.438	1.34875e-16
Pacsin1	6.27194e-21	-1.42854	0.138	0.267	1.37073e-16
Cmc1	8.65849e-21	1.10523	0.597	0.494	1.89231e-16
Homer3	1.42079e-20	1.77736	0.118	0.038	3.10513e-16
Ocln	1.65807e-20	1.30229	0.485	0.33	3.62372e-16
Acsl1	1.75506e-20	1.5917	0.138	0.05	3.83568e-16
Tmem117	2.55099e-20	-2.00202	0.014	0.106	5.57519e-16
Gpr85	2.67153e-20	-1.18232	0.134	0.261	5.83864e-16
Cdk6	4.01536e-20	-2.7174	0.036	0.139	8.77557e-16
Nbl1	4.05274e-20	2.77203	0.054	0.008	8.85726e-16
Tpd52l1	4.43822e-20	2.13622	0.047	0.006	9.69973e-16
Fez1	4.70279e-20	-2.19392	0.007	0.092	1.0278e-15
Vmn2r38	5.1303e-20	8.62286	0.027	0	1.12123e-15
Glp1r	5.20306e-20	2.9958	0.043	0.004	1.13713e-15
Gng4	5.3229e-20	-2.56973	0.038	0.141	1.16332e-15
Relb	6.07875e-20	-1.39719	0.093	0.215	1.32851e-15
Cryab	6.25681e-20	-4.84313	0.006	0.089	1.36743e-15
Lhfpl3	8.10201e-20	3.4091	0.035	0.002	1.77069e-15
H2-M1	9.45244e-20	8.4921	0.031	0.001	2.06583e-15
Ier3	1.20236e-19	1.07421	0.261	0.135	2.62777e-15
Tox3	1.37032e-19	-2.57015	0.04	0.142	2.99484e-15
Plcl1	2.28278e-19	-1.93438	0.049	0.157	4.98901e-15
Vmn2r51	2.49654e-19	5.52288	0.033	0.002	5.45619e-15
Xaf1	2.96696e-19	-1.2865	0.043	0.145	6.48429e-15
Grk6	3.07111e-19	-1.05994	0.168	0.292	6.7119e-15
Dnm3	6.28039e-19	-1.19815	0.177	0.302	1.37258e-14
Me3	6.44547e-19	-2.45031	0.01	0.093	1.40866e-14
Ankrd9	6.55869e-19	-1.08374	0.143	0.265	1.4334e-14
Zdhhc14	7.40538e-19	1.30729	0.595	0.466	1.61845e-14
Vmn2r32	7.61172e-19	8.054	0.031	0.001	1.66354e-14
Oxnad1	8.17169e-19	-1.05272	0.213	0.332	1.78592e-14
Usp40	9.53778e-19	1.00532	0.333	0.191	2.08448e-14
Yjefn3	1.01396e-18	-1.56498	0.047	0.151	2.21601e-14
Cldn23	1.09472e-18	-1.17227	0.13	0.25	2.39252e-14
Pnliprp2	1.21553e-18	5.21828	0.025	0	2.65654e-14
Vmn2r40	1.24606e-18	9.36876	0.027	0.001	2.72326e-14
Sgk3	1.31171e-18	-2.1631	0.039	0.138	2.86674e-14
Slc17a9	1.45326e-18	2.79957	0.049	0.007	3.17609e-14
Rassf2	1.48892e-18	-2.05129	0.049	0.153	3.25403e-14
Plec	1.57243e-18	-1.72331	0.049	0.152	3.43654e-14
Vmn2r20	1.69222e-18	9.84943	0.07	0.006	3.69835e-14
Itpka	2.3799e-18	-3.21542	0.016	0.101	5.20127e-14
Vmn2r53	2.72165e-18	5.38068	0.064	0.014	5.94817e-14
Surf4	2.98775e-18	1.23842	0.652	0.577	6.52972e-14
Stc2	3.04681e-18	4.27807	0.026	0	6.65881e-14
Maoa	4.03693e-18	-1.31482	0.14	0.257	8.82271e-14
Ammecr1	5.01166e-18	-1.21721	0.133	0.251	1.0953e-13
Prag1	5.83673e-18	-1.44839	0.086	0.197	1.27562e-13
Lims1	5.8396e-18	-1.19562	0.118	0.234	1.27624e-13
Atp6ap1l	6.14898e-18	3.43738	0.045	0.006	1.34386e-13
H2bc9	6.28091e-18	1.85658	0.091	0.027	1.37269e-13
Anln	6.72314e-18	1.97623	0.075	0.019	1.46934e-13
Gm49355	7.02205e-18	1.11127	0.32	0.184	1.53467e-13
H2-DMb1	7.31099e-18	-1.41734	0.034	0.128	1.59782e-13
Cdca3	7.5473e-18	-2.36986	0.023	0.11	1.64946e-13
Kif27	9.0432e-18	1.27779	0.141	0.057	1.97639e-13
Vmn2r41	9.92228e-18	13.2488	0.024	0.001	2.16851e-13
Entpd2	1.1014e-17	2.01643	0.106	0.036	2.40712e-13
Vmn2r44	1.16348e-17	13.2253	0.03	0.001	2.54279e-13
St5	1.42723e-17	1.30182	0.318	0.187	3.11921e-13
Vmn2r88	1.44439e-17	12.7457	0.045	0.002	3.15671e-13
Pkp2	1.54594e-17	-1.61072	0.062	0.167	3.37865e-13
Lrp3	1.55489e-17	-3.43075	0.01	0.087	3.39821e-13
Lmcd1	1.5622e-17	-1.12739	0.012	0.091	3.41418e-13
Prkag2	1.62028e-17	1.79611	0.15	0.063	3.54112e-13
Padi1	1.84043e-17	-1.7157	0.079	0.185	4.02226e-13
Sestd1	2.25742e-17	-1.2215	0.114	0.231	4.9336e-13
Paqr4	2.45725e-17	2.8039	0.057	0.012	5.37032e-13
Dcaf4	2.57558e-17	-3.30259	0.014	0.093	5.62894e-13
Terf2	2.58763e-17	1.02343	0.444	0.301	5.65526e-13
Vmn2r48	2.88006e-17	8.60514	0.023	0	6.29437e-13
Frat2	3.89643e-17	-1.06897	0.188	0.298	8.51565e-13
Kcng1	4.20328e-17	-1.02856	0.049	0.148	9.18626e-13
Bend5	5.09081e-17	1.70145	0.095	0.03	1.1126e-12
Iglon5	5.18521e-17	-3.59358	0.01	0.085	1.13323e-12
Il7r	6.887e-17	-4.02462	0.006	0.077	1.50515e-12
Dlg4	8.06653e-17	-1.01894	0.152	0.269	1.76294e-12
Gal	8.65615e-17	-1.75593	0.061	0.16	1.8918e-12
Gbp7	8.738e-17	-4.34541	0.006	0.077	1.90969e-12
Cd274	9.39431e-17	1.40096	0.388	0.251	2.05313e-12
Mtss1	1.3132e-16	-4.14129	0.006	0.076	2.87e-12
H2-M11	1.40216e-16	7.48815	0.022	0	3.06441e-12
Mindy1	1.46429e-16	-2.67048	0.028	0.112	3.2002e-12
Faim2	1.48343e-16	1.52814	0.377	0.265	3.24204e-12
Sec24d	1.54353e-16	1.11738	0.284	0.163	3.37338e-12
Pank1	2.2847e-16	-1.9584	0.05	0.144	4.99322e-12
Nxn	2.31416e-16	1.24285	0.339	0.203	5.05759e-12
Apaf1	2.40559e-16	-1.74542	0.067	0.167	5.25742e-12
H3c4	2.51328e-16	2.86596	0.039	0.005	5.49277e-12
Pkp4	2.58215e-16	1.00609	0.407	0.266	5.64329e-12
Lsm11	2.60393e-16	-3.15997	0.012	0.086	5.6909e-12
Gnaz	2.61269e-16	-1.01079	0.13	0.238	5.71004e-12
Tmem140	2.63473e-16	1.86279	0.066	0.016	5.75821e-12
Vmn2r-ps159	2.80993e-16	8.99705	0.069	0.004	6.14111e-12
Dnah1	3.28485e-16	-4.80314	0.002	0.067	7.17904e-12
Hs3st3b1	3.45081e-16	5.89565	0.023	0	7.54175e-12
Phlda1	3.8315e-16	-1.63803	0.067	0.167	8.37375e-12
Nyap1	3.9189e-16	-2.24628	0.028	0.111	8.56475e-12
Mcc	4.32724e-16	-1.51206	0.066	0.164	9.45719e-12
Kcnab1	4.36353e-16	1.44015	0.071	0.019	9.5365e-12
Zfp267	4.42267e-16	-1.42461	0.109	0.216	9.66575e-12
Pcnx	4.56626e-16	1.09627	0.435	0.302	9.97956e-12
Grin2c	4.85522e-16	1.52281	0.173	0.08	1.06111e-11
Dnase1l1	4.95876e-16	-1.64374	0.07	0.17	1.08374e-11
Rtn4r	5.40879e-16	1.16089	0.147	0.064	1.18209e-11
Pip4k2c	5.48678e-16	1.51107	0.253	0.138	1.19914e-11
Vmn2r31	6.34552e-16	9.48554	0.028	0.001	1.38681e-11
4930452B06Rik	1.99023e-15	-1.67802	0.074	0.171	4.34965e-11
Plcxd3	2.15481e-15	-1.55121	0.018	0.093	4.70933e-11
Lrp5	2.18909e-15	-3.14262	0.015	0.087	4.78426e-11
Thsd7b	2.39658e-15	-1.98208	0.02	0.096	5.23773e-11
Pde2a	2.72324e-15	2.92817	0.039	0.005	5.95163e-11
Zfp275	2.80823e-15	-2.37425	0.037	0.119	6.13739e-11
Kcnb2	4.57426e-15	2.87352	0.034	0.004	9.99704e-11
Ttll10	4.71832e-15	1.16741	0.523	0.402	1.03119e-10
Vmn2r121	4.93759e-15	12.221	0.034	0.001	1.07911e-10
St8sia6	5.74436e-15	4.70942	0.024	0.001	1.25543e-10
Ttyh2	6.29916e-15	-1.50367	0.06	0.15	1.37668e-10
Akna	7.11546e-15	-1.60412	0.064	0.156	1.55508e-10
Ppt2	7.40096e-15	1.82464	0.076	0.023	1.61748e-10
Trim15	7.57628e-15	-1.73551	0.061	0.151	1.6558e-10
Elk4	8.5119e-15	1.25063	0.392	0.261	1.86027e-10
Celsr1	1.01746e-14	2.60772	0.074	0.022	2.22367e-10
Asic2	1.14266e-14	2.11245	0.026	0.002	2.49728e-10
Acsl5	1.43053e-14	1.7336	0.121	0.05	3.12643e-10
Dleu7	1.78946e-14	-1.77531	0.025	0.099	3.91086e-10
Smoc1	2.22363e-14	2.54206	0.044	0.008	4.85975e-10
Ndrg2	2.93031e-14	-1.14469	0.086	0.183	6.4042e-10
Ano4	3.31139e-14	-5.40988	0.001	0.057	7.23705e-10
Gmppb	3.61028e-14	1.14717	0.279	0.165	7.89026e-10
Fgl1	3.84899e-14	2.54207	0.037	0.005	8.41196e-10
Ezr	4.21775e-14	-1.19035	0.084	0.175	9.21789e-10
Plek	4.27683e-14	1.01545	0.432	0.296	9.34702e-10
Vmn2r34	4.8408e-14	9.3899	0.025	0.002	1.05796e-09
Serpinb12	5.22543e-14	-5.26773	0	0.054	1.14202e-09
Tex15	5.25804e-14	-2.16806	0.059	0.144	1.14915e-09
Slc39a14	5.43166e-14	-1.57524	0.077	0.167	1.18709e-09
Lgi2	5.75222e-14	-1.70444	0.02	0.09	1.25715e-09
Mettl8	5.84753e-14	-1.03564	0.183	0.282	1.27798e-09
Lrrc51	5.94074e-14	1.12614	0.241	0.134	1.29835e-09
Dkkl1	6.09931e-14	-2.09376	0.043	0.123	1.333e-09
Lpp	7.05928e-14	-1.52188	0.006	0.065	1.54281e-09
Sst	8.1729e-14	3.06452	0.028	0.003	1.78619e-09
Slc12a3	8.20807e-14	4.15593	0.028	0.003	1.79387e-09
Akr1b10	8.51608e-14	-2.57826	0.025	0.096	1.86119e-09
Sel1l	9.47183e-14	1.13592	0.701	0.678	2.07007e-09
Sgpp2	9.86096e-14	1.17888	0.562	0.439	2.15511e-09
Panx1	1.1741e-13	-2.48251	0.027	0.099	2.56599e-09
Bglap3	1.44675e-13	1.34247	0.292	0.199	3.16187e-09
Aqp11	1.50123e-13	1.03031	0.226	0.124	3.28094e-09
Nwd2	1.91347e-13	4.16914	0.019	0	4.1819e-09
Map3k5	2.16037e-13	-2.22495	0.028	0.099	4.72149e-09
Syvn1	2.23302e-13	1.48845	0.334	0.215	4.88027e-09
Stat6	2.2419e-13	-1.03028	0.039	0.116	4.89967e-09
Frrs1	2.26749e-13	-2.8055	0.018	0.084	4.9556e-09
Il17rd	2.43401e-13	-1.2569	0.068	0.153	5.31953e-09
Ppef1	2.84333e-13	1.36646	0.177	0.092	6.2141e-09
Zfp54	2.944e-13	-2.93093	0.022	0.089	6.4341e-09
Sorbs2	3.13726e-13	1.0003	0.434	0.308	6.85649e-09
Lrrc3b	4.37903e-13	-1.11941	0.088	0.177	9.57037e-09
Rel	4.93359e-13	-1.34159	0.037	0.112	1.07824e-08
Dipk1b	5.40542e-13	-4.24721	0.003	0.056	1.18135e-08
Fgf18	5.65356e-13	1.20426	0.061	0.018	1.23559e-08
H2-M9	6.10376e-13	9.04296	0.037	0.005	1.33398e-08
Zfp362	7.20077e-13	-1.0453	0.048	0.127	1.57373e-08
Pdgfa	7.50576e-13	1.0421	0.14	0.067	1.64038e-08
Gpd2	8.50132e-13	-1.19187	0.118	0.212	1.85796e-08
Arid3b	1.04065e-12	-1.22735	0.082	0.167	2.27434e-08
Sync	1.16225e-12	-2.97724	0.012	0.071	2.5401e-08
Ina	1.21135e-12	-1.05269	0.045	0.122	2.64741e-08
Igf2bp2	1.21194e-12	-1.58271	0.033	0.103	2.6487e-08
Tmem121	1.30997e-12	-3.326	0.007	0.062	2.86294e-08
C1ql1	1.59942e-12	3.0505	0.035	0.006	3.49554e-08
Abca8b	1.6051e-12	-1.14981	0.029	0.097	3.50795e-08
Mnd1	1.6498e-12	-2.02132	0.012	0.07	3.60564e-08
Nrcam	1.69721e-12	1.11736	0.064	0.02	3.70925e-08
Adgrv1	1.74166e-12	4.14143	0.019	0.001	3.8064e-08
Trim71	1.88309e-12	5.04018	0.016	0	4.1155e-08
C1qtnf1	1.93453e-12	-2.23175	0.031	0.099	4.22792e-08
Stat5b	2.01132e-12	-1.08874	0.047	0.123	4.39574e-08
Dmd	2.25513e-12	-4.49145	0.003	0.053	4.92858e-08
Trib2	2.40292e-12	-2.86443	0.008	0.063	5.25158e-08
Shfl	2.43987e-12	-2.65063	0.016	0.076	5.33233e-08
Arhgef12	2.66506e-12	-2.08024	0.046	0.12	5.82449e-08
Garem1	2.66603e-12	-1.31141	0.106	0.191	5.82661e-08
Prtg	2.86378e-12	1.26699	0.365	0.247	6.2588e-08
Krt25	2.93714e-12	1.623	0.046	0.011	6.41911e-08
Arrdc1	3.06182e-12	-1.21366	0.128	0.216	6.69161e-08
Myadm	3.36115e-12	-1.33936	0.049	0.125	7.34578e-08
Il1r2	3.39091e-12	2.17079	0.036	0.006	7.41083e-08
Haao	3.81992e-12	3.52589	0.021	0.001	8.34843e-08
Pifo	3.88685e-12	-1.14917	0.079	0.163	8.4947e-08
Arhgap42	3.93186e-12	-3.91386	0.004	0.054	8.59309e-08
H2-M3	3.98881e-12	2.00333	0.055	0.016	8.71755e-08
Gnb4	4.04936e-12	-3.38109	0.002	0.05	8.84987e-08
Rdh12	5.41631e-12	1.67573	0.064	0.02	1.18374e-07
Mast2	5.65857e-12	-1.6364	0.048	0.121	1.23668e-07
Hes1	6.00352e-12	1.60337	0.107	0.046	1.31207e-07
Naprt	6.16339e-12	-1.44013	0.035	0.104	1.34701e-07
Vmn2r107	6.35796e-12	9.41491	0.027	0.002	1.38953e-07
Casp7	6.50817e-12	-1.10685	0.142	0.228	1.42236e-07
Tenm4	6.71611e-12	1.52085	0.487	0.388	1.46781e-07
Il17rb	6.84065e-12	1.77031	0.037	0.007	1.49502e-07
Slc1a1	8.01145e-12	-1.13746	0.102	0.187	1.7509e-07
Radil	8.90188e-12	2.27978	0.036	0.007	1.94551e-07
Arhgap33os	9.20585e-12	4.4318	0.015	0	2.01194e-07
Tex52	9.5576e-12	-3.77317	0.004	0.053	2.08881e-07
Mslnl	1.03233e-11	-1.65616	0.016	0.074	2.25615e-07
Adpgk	1.08091e-11	1.29354	0.229	0.133	2.36234e-07
Clstn3	1.08229e-11	-2.2782	0.011	0.065	2.36534e-07
Dusp18	1.12019e-11	-1.01171	0.172	0.26	2.44818e-07
Cep95	1.14448e-11	-1.04965	0.08	0.161	2.50125e-07
Crim1	1.14621e-11	1.46035	0.128	0.06	2.50505e-07
Dpf3	1.42232e-11	1.87551	0.093	0.038	3.10848e-07
Ndrg1	1.61917e-11	1.51954	0.122	0.057	3.5387e-07
Tmem25	1.66034e-11	1.52306	0.142	0.071	3.62868e-07
Slc6a9	1.66231e-11	1.07201	0.119	0.055	3.63298e-07
Jak3	1.94153e-11	-1.62127	0.061	0.137	4.24321e-07
Rab20	1.97855e-11	-1.2065	0.103	0.184	4.32411e-07
Nek8	2.00783e-11	-1.48803	0.039	0.106	4.38812e-07
Nt5c3	2.05622e-11	-1.40685	0.06	0.134	4.49386e-07
Tulp2	2.33472e-11	1.38509	0.149	0.077	5.10252e-07
Vav2	2.38837e-11	-1.39139	0.088	0.168	5.21978e-07
Vmn2r89	3.20145e-11	6.50228	0.057	0.012	6.99678e-07
Capg	3.25126e-11	-1.72068	0.079	0.155	7.10563e-07
Ankrd33b	3.27448e-11	-1.67595	0.04	0.107	7.15637e-07
Fam110c	3.5076e-11	-1.98685	0.024	0.084	7.66586e-07
Vmn2r90	4.44823e-11	8.49352	0.035	0.003	9.7216e-07
Gm9780	4.86941e-11	1.69074	0.053	0.016	1.06421e-06
Galnt13	5.68433e-11	3.89537	0.028	0.004	1.24231e-06
Tbl2	6.59831e-11	1.18312	0.207	0.119	1.44206e-06
Pianp	6.66537e-11	-3.43383	0.009	0.058	1.45672e-06
Ackr1	6.8218e-11	-1.31654	0.062	0.136	1.49091e-06
Itprid2	6.85332e-11	-1.04417	0.04	0.105	1.49779e-06
Selenov	7.13179e-11	2.00836	0.032	0.006	1.55865e-06
Efcab6	7.18566e-11	-1.08494	0.058	0.13	1.57043e-06
Srgap3	7.37738e-11	-2.04001	0.055	0.126	1.61233e-06
Rorc	7.77353e-11	2.67875	0.026	0.004	1.6989e-06
Zar1l	8.0894e-11	-1.96561	0.013	0.065	1.76794e-06
Runx1t1	8.48528e-11	-3.13947	0.008	0.056	1.85446e-06
Vmn2r49	8.87728e-11	9.81049	0.018	0.001	1.94013e-06
Abca7	9.04583e-11	1.31186	0.496	0.386	1.97697e-06
Vmn2r73	9.22951e-11	9.88208	0.018	0.001	2.01711e-06
Xpot	9.43359e-11	1.12041	0.307	0.198	2.06171e-06
BC049762	9.57679e-11	1.60818	0.053	0.016	2.09301e-06
Neu3	9.67941e-11	4.38716	0.024	0.003	2.11544e-06
Slc24a3	1.03081e-10	-1.82775	0.03	0.091	2.25283e-06
Ubac2	1.13234e-10	1.12423	0.224	0.132	2.47472e-06
Kif22	1.16355e-10	-1.796	0.042	0.108	2.54293e-06
Wdr78	1.26511e-10	1.35025	0.167	0.092	2.76489e-06
Vmn2r45	1.41243e-10	12.5616	0.016	0	3.08686e-06
Dpp6	1.60208e-10	2.55496	0.028	0.004	3.50134e-06
2610301B20Rik	1.99378e-10	-1.18819	0.116	0.195	4.35741e-06
Vmn2r78	2.09524e-10	10.6687	0.029	0.001	4.57915e-06
Dok1	2.1578e-10	-4.33783	0.002	0.043	4.71587e-06
Rsad1	2.25983e-10	2.07564	0.041	0.01	4.93885e-06
Vmn2r69	2.49833e-10	10.1429	0.022	0.002	5.46009e-06
Ralgapa2	2.50688e-10	1.11856	0.337	0.228	5.47878e-06
Vmn2r-ps130	2.63402e-10	8.88181	0.017	0.001	5.75665e-06
Capn1	2.68416e-10	-2.16684	0.027	0.084	5.86622e-06
Arhgef4	3.01362e-10	-4.34587	0.002	0.042	6.58627e-06
Loxhd1	3.58638e-10	2.31563	0.024	0.003	7.83803e-06
Rras	3.59621e-10	-1.52277	0.023	0.077	7.85953e-06
Map3k8	3.60702e-10	-2.05195	0.039	0.1	7.88314e-06
Vmn2r67	3.68664e-10	11.0882	0.021	0.001	8.05714e-06
Vmn2r18	3.7308e-10	11.842	0.019	0.001	8.15365e-06
Arhgef25	3.88299e-10	2.69117	0.023	0.003	8.48628e-06
Fbxo27	4.16785e-10	2.96678	0.019	0.002	9.10885e-06
Filip1	4.32377e-10	3.22608	0.02	0.002	9.4496e-06
T2	4.32917e-10	-4.76553	0	0.037	9.46139e-06
Napepld	4.67105e-10	-1.18543	0.048	0.113	1.02086e-05
Nova1	4.72775e-10	-3.54191	0.003	0.044	1.03325e-05
Rangrf	4.90837e-10	-1.83682	0.028	0.085	1.07273e-05
Lrrn4	5.11577e-10	4.9714	0.014	0	1.11805e-05
Clu	5.18089e-10	-3.96224	0.013	0.061	1.13228e-05
Gda	5.2041e-10	2.19983	0.05	0.016	1.13736e-05
Rasl10a	6.23704e-10	1.72865	0.042	0.011	1.36311e-05
Dock7	6.27331e-10	-1.58219	0.025	0.08	1.37103e-05
Zfp711	6.88276e-10	-2.68319	0.015	0.064	1.50423e-05
Spaca6	7.02863e-10	-1.66395	0.045	0.108	1.53611e-05
Per3	7.15981e-10	1.77618	0.156	0.087	1.56478e-05
Unc13c	7.8337e-10	-2.02059	0.029	0.085	1.71206e-05
Cdkl5	8.45223e-10	-1.49373	0.075	0.144	1.84724e-05
Mapk11	8.53935e-10	-1.07412	0.091	0.164	1.86628e-05
Cd27	8.8501e-10	2.45193	0.112	0.054	1.93419e-05
Insyn1	9.31643e-10	-3.37514	0.007	0.05	2.03611e-05
Zfp114	1.00131e-09	2.90428	0.045	0.013	2.18836e-05
Mesp2	1.06194e-09	1.92582	0.029	0.005	2.32087e-05
Alkbh8	1.09585e-09	-1.12295	0.096	0.169	2.39498e-05
Samd4	1.10347e-09	-1.16903	0.115	0.19	2.41163e-05
Tmc8	1.14076e-09	-1.7691	0.018	0.068	2.49313e-05
Bicd2	1.2305e-09	-1.1128	0.051	0.114	2.68925e-05
Tafa2	1.27464e-09	3.53301	0.016	0.001	2.78572e-05
Pdlim3	1.27875e-09	3.03383	0.016	0.001	2.79472e-05
Btbd17	1.28991e-09	1.84917	0.023	0.003	2.81909e-05
Btg3	1.33767e-09	-1.35958	0.072	0.14	2.92349e-05
Pdp2	1.34307e-09	-1.42372	0.052	0.117	2.93529e-05
3110021N24Rik	1.44127e-09	-1.45237	0.053	0.117	3.1499e-05
Smad5	1.46451e-09	-1.724	0.039	0.098	3.20068e-05
Gm14496	1.48263e-09	10.669	0.017	0	3.24028e-05
Acta1	1.60092e-09	-1.08115	0.044	0.104	3.49881e-05
Cfap97d2	1.64702e-09	2.85272	0.021	0.003	3.59957e-05
Vmn2r39	1.66172e-09	7.3487	0.027	0.002	3.63169e-05
Glb1	1.88006e-09	1.10271	0.249	0.159	4.10887e-05
Spc24	1.95981e-09	1.22094	0.062	0.023	4.28317e-05
Vmn2r28	2.00092e-09	9.1184	0.023	0.005	4.37302e-05
Galnt9	2.10213e-09	-4.07194	0.002	0.039	4.59421e-05
Nrg4	2.15347e-09	1.65608	0.085	0.037	4.70641e-05
Zfp111	2.16078e-09	-1.45411	0.074	0.141	4.72238e-05
Tro	2.33437e-09	-2.02705	0.008	0.05	5.10176e-05
Akap3	2.56436e-09	-2.42419	0.016	0.063	5.6044e-05
1700125H20Rik	2.95277e-09	1.49079	0.059	0.022	6.45329e-05
S100a11	3.06178e-09	-1.00579	0.059	0.139	6.69151e-05
C1qtnf6	3.21155e-09	-1.03629	0.023	0.074	7.01883e-05
Gm42715	3.31495e-09	-1.50937	0.049	0.11	7.24483e-05
Dio2	3.5532e-09	-3.40597	0.008	0.049	7.76552e-05
Map3k6	3.71022e-09	-1.11187	0.12	0.194	8.10869e-05
Slc35a1	3.72166e-09	-1.0188	0.13	0.202	8.13368e-05
Adcy3	3.74176e-09	-1.594	0.022	0.071	8.17761e-05
Mras	3.87506e-09	1.01741	0.182	0.108	8.46895e-05
Ccdc110	4.14391e-09	3.76223	0.014	0.001	9.05651e-05
Plin3	4.40995e-09	1.53336	0.081	0.036	9.63795e-05
Hoxb13	4.83835e-09	1.36696	0.064	0.025	0.000105742
Fpr3	5.34501e-09	7.8225	0.011	0	0.000116815
Ankrd34b	5.34501e-09	4.84435	0.011	0	0.000116815
Vmn2r21	5.34501e-09	4.76043	0.011	0	0.000116815
Psen1	5.36112e-09	1.02435	0.345	0.241	0.000117167
Vmn2r105	5.43297e-09	8.84412	0.04	0.005	0.000118738
Acvr2b	5.90642e-09	-1.0459	0.14	0.214	0.000129085
Prr36	6.21119e-09	-2.31362	0.012	0.055	0.000135746
Vmn2r43	7.10698e-09	8.46222	0.017	0.002	0.000155323
Vmn2r54	7.20946e-09	7.28491	0.017	0.002	0.000157563
Camk4	7.42071e-09	-3.4364	0.004	0.04	0.00016218
Cmtm8	7.75727e-09	-2.51503	0.016	0.061	0.000169535
Bub1b	8.17077e-09	1.19119	0.06	0.023	0.000178572
Bcorl1	8.27147e-09	-1.32144	0.07	0.134	0.000180773
Vrk2	8.67141e-09	-1.46209	0.05	0.109	0.000189514
Gm14418	9.52484e-09	-2.43099	0.011	0.053	0.000208165
Tyrobp	9.59746e-09	1.05599	0.031	0.012	0.000209753
Pcdh8	1.04297e-08	-1.1428	0.033	0.085	0.00022794
Fcamr	1.04495e-08	-2.07118	0.026	0.075	0.000228374
Cdca8	1.06109e-08	-1.78569	0.039	0.093	0.000231902
Slc4a3	1.06488e-08	-2.77235	0.011	0.052	0.000232729
Cntnap5a	1.0966e-08	-2.89583	0.008	0.047	0.000239662
Vmn2r82	1.10877e-08	12.4243	0.022	0.001	0.000242322
Tex14	1.11972e-08	-1.8356	0.023	0.071	0.000244716
Oas1a	1.16596e-08	-2.17381	0.019	0.065	0.00025482
Lrrc36	1.18834e-08	3.62047	0.012	0	0.000259711
Dnah8	1.20369e-08	4.3006	0.012	0	0.000263067
Vps37b	1.54712e-08	-1.15128	0.13	0.197	0.000338124
Vmn2r50	1.6785e-08	7.81513	0.022	0.004	0.000366836
Prdm15	1.86493e-08	1.60277	0.204	0.131	0.00040758
Bcl6	2.0329e-08	-1.03599	0.141	0.211	0.00044429
H2-T23	2.15855e-08	1.26845	0.357	0.256	0.00047175
