# Supplementary material for: Single-cell transcriptomics of vomeronasal neuroepithelium reveals a differential endoplasmic reticulum environment amongst neuronal subtypes
Source: eLife. 2024 Dec 13;13:RP98250. doi: 10.7554/eLife.98250 (PMC11643622; doi:10.7554/eLife.98250)
Supplement: Supplementary file 1. [file elife-98250-supp1.xlsx]

## Sheet: vno_scrna_top20_cluster_markers
Supplementary file 1. List of top 20 genes specific to each cluster corresponding to Figure 1A, B.
Clusters are colour coded corresponding to Figure 1A, B.
Colour code	Cluster ID	Cluster name	Gene	P value	avg_log2FC	fraction of cells expressing the gene in the cluster	fraction of cells expressing the gene in the other clusters	P value adjusted
	1	Endothelial Cell-2	Ctla2a	0	5.4112	0.838	0.013	0
	1	Endothelial Cell-2	Egfl7	0	4.36671	0.919	0.011	0
	1	Endothelial Cell-2	Ly6c1	0	4.07048	0.703	0.005	0
	1	Endothelial Cell-2	Vwf	0	3.79747	0.838	0.003	0
	1	Endothelial Cell-2	Ptprb	0	3.67624	0.973	0.016	0
	1	Endothelial Cell-2	Flt1	0	3.57882	0.838	0.009	0
	1	Endothelial Cell-2	Esam	0	3.3303	0.946	0.005	0
	1	Endothelial Cell-2	Lrg1	0	3.32395	0.811	0.011	0
	1	Endothelial Cell-2	Clec14a	0	3.30258	0.784	0.004	0
	1	Endothelial Cell-2	Aqp1	1.25585e-302	4.89482	0.865	0.017	2.74465e-298
	1	Endothelial Cell-2	Sparcl1	1.46492e-302	3.9293	0.973	0.021	3.20158e-298
	1	Endothelial Cell-2	Abcg2	2.8131e-297	3.62157	0.838	0.016	6.14802e-293
	1	Endothelial Cell-2	Itih5	6.57209e-233	3.78908	0.784	0.018	1.43633e-228
	1	Endothelial Cell-2	Cldn5	5.88115e-161	3.60076	0.838	0.032	1.28533e-156
	1	Endothelial Cell-2	Eng	4.85782e-150	3.91757	0.892	0.041	1.06168e-145
	1	Endothelial Cell-2	Igfbp7	1.45637e-118	5.12324	0.973	0.063	3.18289e-114
	1	Endothelial Cell-2	Mgp	4.84952e-103	3.73186	0.946	0.066	1.05986e-98
	1	Endothelial Cell-2	Tm4sf1	8.30457e-85	3.8656	0.946	0.088	1.81496e-80
	1	Endothelial Cell-2	Col4a1	6.63157e-57	3.3677	0.649	0.056	1.44933e-52
	1	Endothelial Cell-2	Cd200	3.25227e-38	3.25369	0.892	0.189	7.10784e-34
	2	Neutrophils	S100a9	0	8.42591	0.926	0.006	0
	2	Neutrophils	S100a8	0	8.32568	0.926	0.005	0
	2	Neutrophils	Cxcl2	0	5.97161	0.75	0.022	0
	2	Neutrophils	Il1b	0	5.89926	1	0.049	0
	2	Neutrophils	Slfn4	0	4.75306	0.75	0.005	0
	2	Neutrophils	Csf3r	0	4.42172	0.907	0.013	0
	2	Neutrophils	Il1r2	0	4.24868	0.843	0.018	0
	2	Neutrophils	Tnfaip2	0	4.10302	0.898	0.048	0
	2	Neutrophils	Slpi	0	4.02531	0.519	0.004	0
	2	Neutrophils	Ccrl2	4.15107e-257	4.77755	0.796	0.05	9.07216e-253
	2	Neutrophils	Cxcr4	3.13563e-239	3.86702	0.806	0.056	6.85293e-235
	2	Neutrophils	Fxyd5	2.44325e-216	4.18459	0.954	0.095	5.33972e-212
	2	Neutrophils	Tyrobp	6.1701e-206	4.3822	0.991	0.113	1.34848e-201
	2	Neutrophils	Srgn	2.31633e-188	5.62897	1	0.132	5.06235e-184
	2	Neutrophils	Cd52	6.98295e-177	3.93218	0.991	0.13	1.52612e-172
	2	Neutrophils	Isg15	2.00659e-84	4.85296	0.87	0.237	4.3854e-80
	2	Neutrophils	Msrb1	5.2813e-82	4.817	0.907	0.302	1.15423e-77
	2	Neutrophils	Mcl1	5.58941e-79	4.09879	0.991	0.461	1.22156e-74
	2	Neutrophils	Hdc	8.43177e-78	3.98836	0.759	0.183	1.84276e-73
	2	Neutrophils	Nfkbia	3.53663e-29	3.82764	0.741	0.482	7.7293e-25
	3	Olfactory Ensheating Cells	Fabp7	0	5.64469	0.934	0.006	0
	3	Olfactory Ensheating Cells	Fxyd1	0	4.28656	0.943	0.043	0
	3	Olfactory Ensheating Cells	S100b	0	4.11344	0.934	0.008	0
	3	Olfactory Ensheating Cells	Plp1	0	4.04973	0.902	0.036	0
	3	Olfactory Ensheating Cells	Igfbp7	0	3.99697	0.918	0.055	0
	3	Olfactory Ensheating Cells	Atp1a2	0	3.97005	0.893	0.01	0
	3	Olfactory Ensheating Cells	Mpz	0	3.73754	0.869	0.024	0
	3	Olfactory Ensheating Cells	Cldn5	0	3.73342	0.869	0.024	0
	3	Olfactory Ensheating Cells	Sparcl1	0	3.65559	0.869	0.014	0
	3	Olfactory Ensheating Cells	Paqr6	0	3.41614	0.926	0.039	0
	3	Olfactory Ensheating Cells	Serpina3n	0	3.38853	0.615	0.007	0
	3	Olfactory Ensheating Cells	Scn7a	0	3.36289	0.836	0.002	0
	3	Olfactory Ensheating Cells	Sparc	8.22155e-304	4.39237	0.975	0.073	1.79682e-299
	3	Olfactory Ensheating Cells	Mal	1.16921e-288	3.54309	0.926	0.071	2.55531e-284
	3	Olfactory Ensheating Cells	Cryab	1.6781e-256	4.13798	0.918	0.083	3.66749e-252
	3	Olfactory Ensheating Cells	Apod	3.90052e-253	3.47467	0.713	0.043	8.52458e-249
	3	Olfactory Ensheating Cells	Id3	9.53686e-252	4.32719	0.918	0.083	2.08428e-247
	3	Olfactory Ensheating Cells	Scd1	4.2887e-157	3.47987	0.877	0.134	9.37295e-153
	3	Olfactory Ensheating Cells	Gpm6b	1.20502e-139	3.45747	0.885	0.156	2.63358e-135
	3	Olfactory Ensheating Cells	Dbi	4.32933e-72	3.97411	0.975	0.798	9.46176e-68
	4	Fibroblasts	Mgp	0	6.33759	0.912	0.056	0
	4	Fibroblasts	Col1a2	0	6.03246	0.959	0.013	0
	4	Fibroblasts	Col1a1	0	6.00772	0.939	0.006	0
	4	Fibroblasts	Igfbp4	0	5.41369	0.993	0.075	0
	4	Fibroblasts	Sparc	0	5.31556	0.986	0.071	0
	4	Fibroblasts	Apod	0	5.0042	0.755	0.04	0
	4	Fibroblasts	Col3a1	0	4.99782	0.918	0.005	0
	4	Fibroblasts	Lum	0	4.88843	0.891	0.004	0
	4	Fibroblasts	Acta2	0	4.6988	0.646	0.006	0
	4	Fibroblasts	Tagln	0	4.45894	0.701	0.012	0
	4	Fibroblasts	Sfrp2	0	4.23715	0.721	0.005	0
	4	Fibroblasts	Igfbp7	0	4.1717	0.871	0.053	0
	4	Fibroblasts	Mmp2	0	4.16756	0.918	0.028	0
	4	Fibroblasts	Mfap4	0	4.09533	0.728	0.006	0
	4	Fibroblasts	Nbl1	0	4.01615	0.878	0.052	0
	4	Fibroblasts	Bgn	0	3.93996	0.939	0.019	0
	4	Fibroblasts	Dcn	1.34959e-293	6.1704	0.864	0.072	2.94952e-289
	4	Fibroblasts	Ibsp	4.21277e-211	4.39063	0.129	0	9.207e-207
	4	Fibroblasts	Igfbp5	1.59545e-116	4.85214	0.83	0.18	3.48687e-112
	4	Fibroblasts	Spp1	4.54765e-16	7.04104	0.122	0.022	9.93889e-12
	5	Progenitor cells	Neurod1	0	3.77757	0.765	0.004	0
	5	Progenitor cells	Ube2c	0	2.54918	0.438	0.005	0
	5	Progenitor cells	Pclaf	1.39682e-263	2.15188	0.418	0.015	3.05275e-259
	5	Progenitor cells	Sox11	5.57747e-145	3.93093	0.908	0.205	1.21896e-140
	5	Progenitor cells	Hist1h2ap	2.79983e-124	2.43448	0.484	0.05	6.11902e-120
	5	Progenitor cells	Hes6	2.23315e-107	2.68022	0.889	0.274	4.88055e-103
	5	Progenitor cells	Insm1	8.03171e-101	2.166	0.81	0.21	1.75533e-96
	5	Progenitor cells	Ptma	2.85118e-94	2.54855	1	0.935	6.23125e-90
	5	Progenitor cells	Hnrnpa1	1.97182e-92	2.22938	0.967	0.484	4.30941e-88
	5	Progenitor cells	Smchd1	6.14239e-91	2.4777	0.935	0.383	1.34242e-86
	5	Progenitor cells	Stmn1	5.23168e-90	2.60126	1	0.648	1.14338e-85
	5	Progenitor cells	H1f10	9.71038e-86	2.20504	0.804	0.234	2.1222e-81
	5	Progenitor cells	Tubb5	4.03736e-83	2.47511	0.993	0.701	8.82364e-79
	5	Progenitor cells	Tmsb10	2.13451e-76	2.33597	1	0.829	4.66496e-72
	5	Progenitor cells	Elavl4	1.63347e-69	2.31392	0.869	0.446	3.56995e-65
	5	Progenitor cells	H2az1	2.41406e-67	2.16082	0.993	0.851	5.27592e-63
	5	Progenitor cells	Stmn2	5.13841e-58	2.93019	0.895	0.578	1.123e-53
	5	Progenitor cells	Tubb3	7.79811e-54	2.19024	0.882	0.585	1.70428e-49
	5	Progenitor cells	Hmgn2	1.03387e-51	2.68015	0.85	0.491	2.25952e-47
	5	Progenitor cells	Hmgb2	1.13541e-33	2.90177	0.902	0.666	2.48145e-29
	6	Macrophage (Mac1)	Lsp1	0	3.28692	0.936	0.058	0
	6	Macrophage (Mac1)	Cd52	0	3.16802	0.982	0.119	0
	6	Macrophage (Mac1)	Napsa	0	3.0546	0.867	0.015	0
	6	Macrophage (Mac1)	Cytip	0	2.60567	0.844	0.042	0
	6	Macrophage (Mac1)	Plbd1	0	2.54784	0.739	0.031	0
	6	Macrophage (Mac1)	Coro1a	4.9232e-301	2.48254	0.927	0.108	1.07597e-296
	6	Macrophage (Mac1)	Fxyd5	4.36983e-269	2.48064	0.812	0.088	9.55026e-265
	6	Macrophage (Mac1)	Alox5ap	9.22845e-213	2.59469	0.794	0.12	2.01688e-208
	6	Macrophage (Mac1)	Ccr7	3.08219e-190	2.56722	0.161	0.002	6.73612e-186
	6	Macrophage (Mac1)	H2-Aa	3.52733e-179	3.92394	0.899	0.214	7.70899e-175
	6	Macrophage (Mac1)	Lgals3	1.59436e-173	2.47431	0.789	0.138	3.48448e-169
	6	Macrophage (Mac1)	H2-Eb1	1.3196e-168	3.78497	0.899	0.226	2.88398e-164
	6	Macrophage (Mac1)	Ly6c2	2.16649e-161	2.70263	0.229	0.009	4.73486e-157
	6	Macrophage (Mac1)	Cd74	9.49146e-155	3.20832	0.959	0.277	2.07436e-150
	6	Macrophage (Mac1)	H2-Ab1	3.29574e-146	3.31432	0.872	0.233	7.20285e-142
	6	Macrophage (Mac1)	S100a4	3.08288e-145	2.84187	0.601	0.094	6.73764e-141
	6	Macrophage (Mac1)	Crip1	3.15984e-135	3.3027	0.931	0.331	6.90582e-131
	6	Macrophage (Mac1)	Atox1	4.66491e-123	2.47307	0.968	0.449	1.01952e-118
	6	Macrophage (Mac1)	Cst3	6.86529e-111	3.68395	0.986	0.84	1.50041e-106
	6	Macrophage (Mac1)	Plac8	1.26735e-38	2.86421	0.674	0.438	2.76979e-34
	7	Tmbim+ Gnai2 neurons	Tmbim1	0	1.44608	0.944	0.127	0
	7	Tmbim+ Gnai2 neurons	Clec2g	0	1.22643	0.71	0.045	0
	7	Tmbim+ Gnai2 neurons	Pvalb	1.23977e-209	3.0787	0.993	0.331	2.70952e-205
	7	Tmbim+ Gnai2 neurons	Prph	8.05525e-193	2.07972	0.993	0.298	1.76047e-188
	7	Tmbim+ Gnai2 neurons	Lxn	1.9132e-190	1.46833	0.955	0.273	4.1813e-186
	7	Tmbim+ Gnai2 neurons	Vmn1r85	9.08027e-139	4.47444	0.364	0.04	1.98449e-134
	7	Tmbim+ Gnai2 neurons	Vmn1r89	3.3257e-137	4.72713	0.383	0.046	7.26833e-133
	7	Tmbim+ Gnai2 neurons	Trpc2	1.84901e-133	1.31311	0.989	0.448	4.04101e-129
	7	Tmbim+ Gnai2 neurons	Plscr1	7.14184e-131	1.27012	0.989	0.468	1.56085e-126
	7	Tmbim+ Gnai2 neurons	Fth1	2.28486e-128	1.25157	1	0.983	4.99356e-124
	7	Tmbim+ Gnai2 neurons	Dcdc2a	2.38113e-115	1.15937	0.981	0.39	5.20395e-111
	7	Tmbim+ Gnai2 neurons	Qpct	3.58843e-98	1.03328	0.981	0.409	7.84252e-94
	7	Tmbim+ Gnai2 neurons	Pebp1	5.08856e-98	1.0302	1	0.861	1.1121e-93
	7	Tmbim+ Gnai2 neurons	Pof1b	2.19755e-96	0.984981	0.729	0.22	4.80274e-92
	7	Tmbim+ Gnai2 neurons	Cd47	2.16418e-95	0.999157	0.996	0.83	4.72982e-91
	7	Tmbim+ Gnai2 neurons	Cdkn1a	1.70189e-93	1.18911	0.996	0.634	3.71949e-89
	7	Tmbim+ Gnai2 neurons	Jak1	7.70972e-89	1.06305	0.996	0.73	1.68496e-84
	7	Tmbim+ Gnai2 neurons	Vmn1r86	1.31802e-75	4.8308	0.171	0.015	2.88053e-71
	7	Tmbim+ Gnai2 neurons	Gng2	8.25118e-66	0.986893	0.996	0.556	1.80329e-61
	7	Tmbim+ Gnai2 neurons	Vmn1r237	9.76224e-50	1.93815	0.119	0.011	2.13354e-45
	8	Macrophage (Mac2)	C1qb	0	4.3402	0.985	0.052	0
	8	Macrophage (Mac2)	C1qa	0	4.30129	0.978	0.049	0
	8	Macrophage (Mac2)	Apoe	0	4.0921	1	0.162	0
	8	Macrophage (Mac2)	Lyz2	0	4.08624	0.849	0.065	0
	8	Macrophage (Mac2)	C1qc	0	4.03722	0.967	0.05	0
	8	Macrophage (Mac2)	Ctss	0	3.78546	0.904	0.123	0
	8	Macrophage (Mac2)	Ms4a7	0	3.75415	0.823	0.045	0
	8	Macrophage (Mac2)	Fcer1g	0	3.7271	0.948	0.091	0
	8	Macrophage (Mac2)	Aif1	0	3.47922	0.705	0.064	0
	8	Macrophage (Mac2)	Tyrobp	0	3.21806	0.908	0.099	0
	8	Macrophage (Mac2)	Fcrls	7.61369e-292	3.04343	0.487	0.031	1.66397e-287
	8	Macrophage (Mac2)	Ly86	5.94838e-276	3.03613	0.631	0.062	1.30002e-271
	8	Macrophage (Mac2)	Pf4	8.78887e-253	3.95031	0.413	0.025	1.92081e-248
	8	Macrophage (Mac2)	Trf	1.96976e-187	2.87569	0.506	0.06	4.30491e-183
	8	Macrophage (Mac2)	Cst3	1.15843e-147	3.09731	0.993	0.839	2.53174e-143
	8	Macrophage (Mac2)	Selenop	2.59818e-135	3.01007	0.638	0.146	5.67832e-131
	8	Macrophage (Mac2)	Ccl8	1.52727e-109	3.11578	0.148	0.007	3.33785e-105
	8	Macrophage (Mac2)	Lst1	7.66922e-102	3.08549	0.635	0.199	1.67611e-97
	8	Macrophage (Mac2)	Bst2	1.13874e-95	2.93628	0.863	0.718	2.48872e-91
	8	Macrophage (Mac2)	Npc2	1.00617e-72	2.81549	0.771	0.551	2.19898e-68
	9	T-cells	Cd3g	0	3.89384	0.775	0.002	0
	9	T-cells	Cd3d	0	3.28904	0.754	0.002	0
	9	T-cells	Nkg7	0	3.16193	0.363	0.001	0
	9	T-cells	Cd52	0	3.1572	0.993	0.112	0
	9	T-cells	Hcst	0	3.11693	0.872	0.037	0
	9	T-cells	Cxcr6	0	3.10196	0.723	0.001	0
	9	T-cells	Ms4a4b	0	3.05604	0.526	0.004	0
	9	T-cells	Il7r	0	2.92436	0.637	0.048	0
	9	T-cells	Lgals1	0	2.87287	0.744	0.075	0
	9	T-cells	Ptprcap	0	2.8038	0.855	0.012	0
	9	T-cells	Ltb	0	2.7463	0.768	0.021	0
	9	T-cells	Arhgdib	0	2.72412	0.917	0.112	0
	9	T-cells	Cd163l1	0	2.67478	0.422	0.002	0
	9	T-cells	S100a4	1.25701e-281	3.06326	0.706	0.086	2.74721e-277
	9	T-cells	Ramp1	3.35011e-274	2.77344	0.664	0.078	7.32166e-270
	9	T-cells	Vps37b	4.95964e-257	3.10567	0.813	0.151	1.08393e-252
	9	T-cells	Ifngr1	4.73133e-191	2.89684	0.882	0.265	1.03403e-186
	9	T-cells	S100a10	2.73775e-170	2.95093	0.938	0.395	5.98336e-166
	9	T-cells	Ccl5	9.07401e-167	5.03824	0.287	0.02	1.98312e-162
	9	T-cells	Crip1	7.81755e-154	2.65873	0.886	0.328	1.70853e-149
	10	Macrophage (Mac3)	Ccl4	0	4.8781	0.897	0.031	0
	10	Macrophage (Mac3)	C1qa	0	4.51403	0.991	0.043	0
	10	Macrophage (Mac3)	Ccl3	0	4.45532	0.918	0.02	0
	10	Macrophage (Mac3)	Apoe	0	4.444	0.994	0.157	0
	10	Macrophage (Mac3)	C1qb	0	4.43221	0.994	0.045	0
	10	Macrophage (Mac3)	C1qc	0	4.38848	0.994	0.043	0
	10	Macrophage (Mac3)	Ctss	0	4.23699	0.997	0.115	0
	10	Macrophage (Mac3)	Ccl12	0	4.02701	0.655	0.016	0
	10	Macrophage (Mac3)	Ms4a7	0	3.93579	0.991	0.033	0
	10	Macrophage (Mac3)	Ccl7	0	3.84508	0.418	0.006	0
	10	Macrophage (Mac3)	Ccl2	0	3.83848	0.597	0.014	0
	10	Macrophage (Mac3)	Cd14	0	3.62606	0.958	0.086	0
	10	Macrophage (Mac3)	Lyz2	0	3.599	0.964	0.055	0
	10	Macrophage (Mac3)	Ctsc	0	3.58345	0.994	0.064	0
	10	Macrophage (Mac3)	Cx3cr1	0	3.50439	0.936	0.017	0
	10	Macrophage (Mac3)	Csf1r	0	3.4781	0.982	0.029	0
	10	Macrophage (Mac3)	Rgs1	0	3.42284	0.867	0.047	0
	10	Macrophage (Mac3)	Fcer1g	0	3.39262	0.997	0.083	0
	10	Macrophage (Mac3)	Trem2	0	3.31139	0.921	0.022	0
	10	Macrophage (Mac3)	Hexb	7.8456e-251	3.45555	0.994	0.367	1.71466e-246
	11	Non-sensory epithelium	Ly6d	0	4.73743	0.929	0.026	0
	11	Non-sensory epithelium	Reg3g	0	4.62991	0.439	0.026	0
	11	Non-sensory epithelium	Scgb1c1	0	4.13079	0.826	0.009	0
	11	Non-sensory epithelium	Krt5	0	4.08791	0.889	0.009	0
	11	Non-sensory epithelium	Aqp3	0	4.05128	0.916	0.026	0
	11	Non-sensory epithelium	Krt15	0	3.72042	0.767	0.007	0
	11	Non-sensory epithelium	Ccn2	0	3.54481	0.592	0.034	0
	11	Non-sensory epithelium	Fxyd3	0	3.43501	0.954	0.085	0
	11	Non-sensory epithelium	Krt17	0	3.37098	0.87	0.074	0
	11	Non-sensory epithelium	Cbr2	0	3.28645	0.985	0.23	0
	11	Non-sensory epithelium	Cyp2f2	0	3.27896	0.811	0.035	0
	11	Non-sensory epithelium	Slc6a6	0	3.14103	0.994	0.328	0
	11	Non-sensory epithelium	Krt14	0	3.05401	0.777	0.026	0
	11	Non-sensory epithelium	Sult1e1	0	2.96232	0.75	0.084	0
	11	Non-sensory epithelium	Sgk1	0	2.88683	0.931	0.16	0
	11	Non-sensory epithelium	Sfn	0	2.77623	0.924	0.099	0
	11	Non-sensory epithelium	Mt1	3.39075e-237	2.98752	0.987	0.562	7.41047e-233
	11	Non-sensory epithelium	Fos	2.41361e-228	2.98219	0.956	0.633	5.27494e-224
	11	Non-sensory epithelium	Gclm	2.77211e-224	2.78194	0.96	0.566	6.05844e-220
	11	Non-sensory epithelium	Ltf	3.68568e-69	3.77661	0.214	0.039	8.05505e-65
	12	Immature neurons	Gap43	0	3.58055	0.948	0.326	0
	12	Immature neurons	Sox11	0	2.76906	0.956	0.176	0
	12	Immature neurons	Bfsp2	0	2.66223	0.785	0.149	0
	12	Immature neurons	Dpysl3	0	2.58512	0.983	0.413	0
	12	Immature neurons	Ina	0	2.25898	0.875	0.067	0
	12	Immature neurons	Stmn2	2.14647e-304	3.61706	0.996	0.56	4.69112e-300
	12	Immature neurons	Stmn1	8.11359e-292	3.37811	0.994	0.635	1.77322e-287
	12	Immature neurons	Tubb2b	4.92568e-285	2.67694	0.992	0.631	1.07651e-280
	12	Immature neurons	Tubb5	4.46405e-284	3.48249	0.994	0.689	9.75618e-280
	12	Immature neurons	Tmsb10	3.26337e-268	2.85044	0.998	0.822	7.1321e-264
	12	Immature neurons	Tubb3	4.91466e-260	2.29297	0.994	0.567	1.0741e-255
	12	Immature neurons	Tuba1a	1.82369e-259	2.10028	0.998	0.755	3.98567e-255
	12	Immature neurons	Ptma	1.88294e-250	1.92395	0.994	0.933	4.11515e-246
	12	Immature neurons	Rtn1	4.2943e-246	2.2159	0.965	0.639	9.38519e-242
	12	Immature neurons	Basp1	2.35578e-245	2.17265	0.975	0.622	5.14856e-241
	12	Immature neurons	Ly6h	1.0644e-236	2.01043	0.94	0.449	2.32625e-232
	12	Immature neurons	Cdkn1c	4.56892e-195	2.06055	0.904	0.41	9.98538e-191
	12	Immature neurons	Tex15	3.69832e-118	2.1063	0.373	0.078	8.08267e-114
	12	Immature neurons	Lmo4	2.45804e-112	1.90856	0.927	0.663	5.37206e-108
	12	Immature neurons	Crabp1	2.3235e-62	2.75149	0.494	0.214	5.07802e-58
	13	Cells from glandular tissue	Obp2a	1.77093e-285	3.91445	0.321	0.027	3.87037e-281
	13	Cells from glandular tissue	Lcn3	8.42018e-175	3.17516	0.181	0.013	1.84023e-170
	13	Cells from glandular tissue	Wfdc18	2.7617e-133	3.07618	0.234	0.035	6.0357e-129
	13	Cells from glandular tissue	Obp2b	1.03093e-114	3.18454	0.13	0.01	2.25309e-110
	13	Cells from glandular tissue	Lcn4	1.14434e-96	2.67796	0.105	0.008	2.50096e-92
	13	Cells from glandular tissue	Rbm4b	6.27048e-79	0.84176	0.145	0.604	1.37041e-74
	13	Cells from glandular tissue	Reg3g	1.03806e-75	0.70205	0.179	0.035	2.26867e-71
	13	Cells from glandular tissue	Vmn1r37	2.9725e-72	0.807514	0.203	0.047	6.49639e-68
	13	Cells from glandular tissue	Cspp1	5.78082e-69	0.601173	0.146	0.573	1.2634e-64
	13	Cells from glandular tissue	Tnrc6c	2.4743e-65	0.596142	0.233	0.736	5.40759e-61
	13	Cells from glandular tissue	Adgrl3	5.57013e-55	0.588596	0.14	0.51	1.21735e-50
	13	Cells from glandular tissue	Ahi1	4.78321e-50	0.802249	0.194	0.599	1.04537e-45
	13	Cells from glandular tissue	Fam160a2	2.77404e-48	0.588888	0.029	0.272	6.06267e-44
	13	Cells from glandular tissue	P2ry14	9.74364e-48	1.10093	0.105	0.418	2.12947e-43
	13	Cells from glandular tissue	Enox1	4.64062e-43	0.628931	0.099	0.386	1.01421e-38
	13	Cells from glandular tissue	Cyb5a	1.10191e-15	0.595545	0.391	0.803	2.40823e-11
	13	Cells from glandular tissue	Lars2	3.55177e-14	0.76913	0.151	0.321	7.7624e-10
	13	Cells from glandular tissue	Epha5	2.14794e-08	0.742335	0.33	0.552	0.000469433
	13	Cells from glandular tissue	Nupr1	2.3539e-06	0.601308	0.254	0.194	0.0514445
	13	Cells from glandular tissue	Pigr	0.000287277	0.629525	0.097	0.153	1
	14	Gnao1 neurons	Gm36028	0	3.8737	0.972	0.454	0
	14	Gnao1 neurons	Cnpy1	0	2.55533	0.871	0.093	0
	14	Gnao1 neurons	Stbd1	0	2.4473	0.979	0.594	0
	14	Gnao1 neurons	Calr4	0	2.42709	0.966	0.545	0
	14	Gnao1 neurons	Gnao1	0	2.39059	0.855	0.123	0
	14	Gnao1 neurons	Vmn2r7	0	2.35572	0.568	0.058	0
	14	Gnao1 neurons	Vmn2r2	0	2.35532	0.464	0.02	0
	14	Gnao1 neurons	Apmap	0	2.35123	0.912	0.541	0
	14	Gnao1 neurons	Agpat5	0	2.28917	0.863	0.37	0
	14	Gnao1 neurons	Vmn2r6	0	2.16258	0.446	0.035	0
	14	Gnao1 neurons	Vmn2r4	0	2.15513	0.281	0.012	0
	14	Gnao1 neurons	H2-M10.3	0	2.15114	0.349	0.03	0
	14	Gnao1 neurons	Sdf2l1	0	2.06166	0.872	0.564	0
	14	Gnao1 neurons	Fetub	0	2.05345	0.98	0.591	0
	14	Gnao1 neurons	Manf	0	2.04145	0.936	0.755	0
	14	Gnao1 neurons	Dnajc3	0	2.02759	0.891	0.604	0
	14	Gnao1 neurons	H2-M10.5	1.76036e-302	3.77067	0.304	0.025	3.84728e-298
	14	Gnao1 neurons	H2-M10.6	1.94276e-280	2.20862	0.235	0.012	4.2459e-276
	14	Gnao1 neurons	H2-M10.4	6.29925e-146	2.90715	0.153	0.013	1.3767e-141
	14	Gnao1 neurons	H2-M10.1	1.18309e-108	2.40376	0.115	0.01	2.58564e-104
	15	Sustentacular cells	Ppic	0	4.69223	0.967	0.136	0
	15	Sustentacular cells	Cyp2a5	0	3.8386	0.871	0.04	0
	15	Sustentacular cells	Wfdc2	0	3.32891	0.947	0.118	0
	15	Sustentacular cells	Sftpd	0	3.32535	0.862	0.038	0
	15	Sustentacular cells	Pam	0	3.2161	0.879	0.129	0
	15	Sustentacular cells	Sprr1a	0	3.10161	0.791	0.078	0
	15	Sustentacular cells	Por	0	3.05956	0.925	0.617	0
	15	Sustentacular cells	Pglyrp1	0	3.04019	0.797	0.065	0
	15	Sustentacular cells	A2ml1	0	3.02794	0.88	0.205	0
	15	Sustentacular cells	Ifitm1	0	2.88913	0.873	0.587	0
	15	Sustentacular cells	Tmem213	0	2.87827	0.795	0.041	0
	15	Sustentacular cells	Nupr1	0	2.8475	0.817	0.096	0
	15	Sustentacular cells	Prdx6	0	2.75674	0.919	0.711	0
	15	Sustentacular cells	Plat	0	2.75367	0.801	0.101	0
	15	Sustentacular cells	Igfbp2	0	2.72728	0.855	0.079	0
	15	Sustentacular cells	Slc4a11	0	2.70635	0.807	0.098	0
	15	Sustentacular cells	Ces1d	0	2.69313	0.803	0.063	0
	15	Sustentacular cells	Sox2	0	2.68307	0.789	0.082	0
	15	Sustentacular cells	Agr2	0	2.56954	0.73	0.041	0
	15	Sustentacular cells	Krt23	0	2.54913	0.749	0.059	0
	16	Gnai2 neiurons	Gng13	0	2.45912	0.985	0.326	0
	16	Gnai2 neiurons	Nsg1	0	2.37842	0.988	0.407	0
	16	Gnai2 neiurons	Gnai2	0	2.10934	0.992	0.667	0
	16	Gnai2 neiurons	Cartpt	0	1.75071	0.989	0.45	0
	16	Gnai2 neiurons	Pcp4l1	0	1.74599	0.827	0.255	0
	16	Gnai2 neiurons	Cystm1	0	1.68802	0.984	0.543	0
	16	Gnai2 neiurons	Gng2	0	1.67469	0.982	0.355	0
	16	Gnai2 neiurons	Prxl2a	0	1.59728	0.985	0.508	0
	16	Gnai2 neiurons	Rtp1	0	1.58285	0.966	0.18	0
	16	Gnai2 neiurons	Fam241a	0	1.57328	0.972	0.341	0
	16	Gnai2 neiurons	Stmn4	0	1.5463	0.962	0.327	0
	16	Gnai2 neiurons	Epha5	0	1.54306	0.971	0.306	0
	16	Gnai2 neiurons	Gnb1	0	1.45479	0.994	0.804	0
	16	Gnai2 neiurons	Plekhb1	0	1.44585	0.973	0.291	0
	16	Gnai2 neiurons	Omp	0	1.43703	0.983	0.38	0
	16	Gnai2 neiurons	Eef1a2	0	1.43404	0.981	0.366	0
	16	Gnai2 neiurons	Car2	0	1.42976	0.97	0.366	0
	16	Gnai2 neiurons	Chga	0	1.42384	0.993	0.511	0
	16	Gnai2 neiurons	S100z	0	1.40806	0.979	0.418	0
	16	Gnai2 neiurons	S100a5	6.09529e-122	1.69811	0.189	0.04	1.33213e-117
	17	Endothelial Cell	Ccl21a	0	7.94093	1	0.001	0
	17	Endothelial Cell	Mmrn1	0	4.62982	1	0.001	0
	17	Endothelial Cell	Gpihbp1	0	3.61164	0.923	0.001	0
	17	Endothelial Cell	Lyve1	0	3.31539	0.462	0	0
	17	Endothelial Cell	Flt4	0	3.24327	0.923	0.001	0
	17	Endothelial Cell	Gm525	0	3.08172	0.923	0.002	0
	17	Endothelial Cell	Ecscr	4.48794e-272	3.36632	0.923	0.008	9.80839e-268
	17	Endothelial Cell	Cavin2	6.51632e-194	3.37769	0.846	0.009	1.42414e-189
	17	Endothelial Cell	Egfl7	2.60044e-191	4.35517	1	0.014	5.68326e-187
	17	Endothelial Cell	Aqp1	6.68381e-143	4.13917	1	0.019	1.46075e-138
	17	Endothelial Cell	Plvap	8.38909e-98	3.6028	0.923	0.024	1.83344e-93
	17	Endothelial Cell	Cldn5	1.95935e-83	3.78497	1	0.034	4.28215e-79
	17	Endothelial Cell	Ramp2	1.00005e-57	3.27645	0.846	0.036	2.18561e-53
	17	Endothelial Cell	Pard6g	1.05244e-46	3.17909	0.923	0.055	2.3001e-42
	17	Endothelial Cell	Igfbp7	4.50174e-44	3.66058	1	0.065	9.83855e-40
	17	Endothelial Cell	Ltbp4	1.208e-38	3.76837	1	0.081	2.64008e-34
	17	Endothelial Cell	Cavin3	2.37334e-35	3.88856	1	0.09	5.18693e-31
	17	Endothelial Cell	Gng11	3.04957e-29	5.1338	1	0.115	6.66484e-25
	17	Endothelial Cell	Tm4sf1	6.09354e-28	3.12037	0.923	0.09	1.33174e-23
	17	Endothelial Cell	Selenop	3.51396e-20	3.39121	1	0.16	7.67976e-16
	18	Solitiary chemosensory neurons	Gnat3	0	5.0494	1	0.001	0
	18	Solitiary chemosensory neurons	Gnb3	0	4.83649	1	0.002	0
	18	Solitiary chemosensory neurons	Rgs21	0	3.89799	1	0	0
	18	Solitiary chemosensory neurons	Avil	0	3.04013	1	0.003	0
	18	Solitiary chemosensory neurons	Trpm5	0	2.8568	1	0	0
	18	Solitiary chemosensory neurons	Slitrk6	0	2.6165	1	0.005	0
	18	Solitiary chemosensory neurons	Lipc	1.09498e-132	3.03138	1	0.012	2.39309e-128
	18	Solitiary chemosensory neurons	Ovol3	3.95747e-104	3.52112	1	0.016	8.64904e-100
	18	Solitiary chemosensory neurons	Atp2a3	7.86247e-100	3.98871	1	0.017	1.71834e-95
	18	Solitiary chemosensory neurons	Lrmp	1.91647e-91	4.80262	1	0.019	4.18844e-87
	18	Solitiary chemosensory neurons	Ltc4s	6.70919e-72	4.03773	1	0.024	1.46629e-67
	18	Solitiary chemosensory neurons	Cadps2	1.35167e-30	2.88504	1	0.063	2.95408e-26
	18	Solitiary chemosensory neurons	Kctd12	8.42471e-23	3.10475	1	0.084	1.84122e-18
	18	Solitiary chemosensory neurons	Bex4	2.77658e-22	2.9948	1	0.087	6.06822e-18
	18	Solitiary chemosensory neurons	Krt19	1.86441e-20	4.45249	1	0.1	4.07466e-16
	18	Solitiary chemosensory neurons	Anxa4	1.87739e-15	4.27	1	0.146	4.10304e-11
	18	Solitiary chemosensory neurons	Cap1	2.76296e-09	3.55409	1	0.296	6.03846e-05
	18	Solitiary chemosensory neurons	Cited2	7.27864e-09	2.77845	1	0.31	0.000159075
	18	Solitiary chemosensory neurons	Plac8	1.36272e-07	3.0589	1	0.443	0.00297822
	18	Solitiary chemosensory neurons	Krt8	1.47632e-07	2.73586	1	0.387	0.00322649
