# Supplementary material for: Single-cell transcriptomics of vomeronasal neuroepithelium reveals a differential endoplasmic reticulum environment amongst neuronal subtypes
Source: eLife. 2024 Dec 13;13:RP98250. doi: 10.7554/eLife.98250 (PMC11643622; doi:10.7554/eLife.98250)
Supplement: Supplementary file 3. [file elife-98250-supp3.xlsx]

## Sheet: top30markers_macrophage_compari
Supplementary file 3. List of top 30 highly expressed genes in three macrophage clusters (corresponding to Figure 2B, 2C) selected based on log2Fold change comparison of each cluster with other two clusters.
Genes commmon to all or two macrophage clusters(such as C1qa, C1qb, C1qc, H2-Aa) will not show up in this table. Please refer to supplementary file 2 for major markers
cluster	gene	p_val	avg_log2FC	Fraction of cell expressing in the cluster	Fraction of cell expressing in other clusters	p_val_adj
10-Mac3	Ccl3	1.71736e-110	3.98074	0.918	0.143	3.75328e-106
10-Mac3	Cd14	2.21859e-110	3.45072	0.958	0.176	4.84873e-106
10-Mac3	Tmcc3	8.68412e-92	3.21495	0.809	0.117	1.89791e-87
10-Mac3	Cx3cr1	4.69132e-90	2.58605	0.936	0.217	1.02529e-85
10-Mac3	Mafb	9.49474e-88	2.61623	0.915	0.172	2.07508e-83
10-Mac3	Ccl4	8.26906e-84	3.2575	0.897	0.249	1.8072e-79
10-Mac3	Klf6	4.71526e-82	2.58555	0.933	0.329	1.03052e-77
10-Mac3	C3ar1	7.00825e-82	2.14425	0.803	0.088	1.53165e-77
10-Mac3	Tlr2	4.55677e-81	3.26698	0.755	0.1	9.95882e-77
10-Mac3	Atf3	4.63983e-79	2.62334	0.939	0.313	1.01403e-74
10-Mac3	Nfkbiz	5.69013e-76	3.53511	0.773	0.16	1.24358e-71
10-Mac3	Ets2	1.4076e-75	4.19564	0.636	0.051	3.0763e-71
10-Mac3	Abca1	5.12093e-75	2.5306	0.694	0.063	1.11918e-70
10-Mac3	Gpr65	4.49357e-74	2.35625	0.873	0.235	9.82069e-70
10-Mac3	Rgs1	7.34467e-73	2.51571	0.867	0.231	1.60518e-68
10-Mac3	Ubc	9.20184e-73	1.72437	0.991	0.593	2.01106e-68
10-Mac3	Jun	1.76419e-71	2.63846	0.921	0.354	3.85564e-67
10-Mac3	Ifi207	2.24853e-71	2.06292	0.9	0.307	4.91416e-67
10-Mac3	Tgfbr1	6.10523e-71	2.33405	0.797	0.176	1.3343e-66
10-Mac3	Cebpb	1.12455e-70	1.6202	0.927	0.278	2.45771e-66
10-Mac3	Rilpl2	3.97048e-68	2.80367	0.788	0.225	8.67749e-64
10-Mac3	Adgre1	2.13722e-67	1.50009	0.852	0.149	4.6709e-63
10-Mac3	Cebpa	2.52094e-67	2.46801	0.724	0.125	5.50952e-63
10-Mac3	Fyb	4.6339e-67	1.77841	0.93	0.311	1.01274e-62
10-Mac3	Itgb5	4.97337e-67	1.54557	0.803	0.139	1.08693e-62
10-Mac3	Il1b	7.24682e-67	2.7153	0.821	0.239	1.58379e-62
10-Mac3	Lair1	8.34335e-67	1.76591	0.845	0.164	1.82344e-62
10-Mac3	Axl	1.86529e-66	1.60407	0.815	0.174	4.07659e-62
10-Mac3	Ier3	2.56082e-65	3.13036	0.761	0.2	5.59668e-61
10-Mac3	Mertk	1.29183e-64	5.44024	0.5	0.006	2.8233e-60
8-Mac2	Itm2b	3.39665e-33	1.00484	0.989	0.984	7.42337e-29
8-Mac2	Ifi27l2a	1.06226e-11	1.06733	0.797	0.878	2.32157e-07
8-Mac2	Ndufaf8	6.61134e-10	1.00012	0.125	0.38	1.44491e-05
8-Mac2	Stx4a	9.26627e-10	1.04546	0.103	0.336	2.02514e-05
8-Mac2	Echs1	1.29257e-09	1.06945	0.096	0.318	2.82491e-05
8-Mac2	Selenot	7.74604e-09	1.01275	0.122	0.356	0.00016929
8-Mac2	Naa38	1.1458e-08	1.00178	0.125	0.354	0.000250414
8-Mac2	Dmac1	1.35932e-08	1.00035	0.081	0.276	0.00029708
8-Mac2	Aplp2	2.02187e-08	1.08341	0.177	0.445	0.00044188
8-Mac2	Snapc5	2.45529e-08	1.02011	0.148	0.392	0.000536603
8-Mac2	Elof1	2.8361e-08	1.02002	0.129	0.356	0.00061983
8-Mac2	Dynll2	3.1719e-08	1.11096	0.111	0.319	0.000693219
8-Mac2	Tsnax	4.81884e-08	1.12726	0.133	0.307	0.00105316
8-Mac2	Fundc2	5.18738e-08	1.04334	0.118	0.33	0.0011337
8-Mac2	Slc48a1	1.0441e-07	1.02777	0.085	0.265	0.00228188
8-Mac2	Timm17b	1.45444e-07	1.02145	0.077	0.246	0.00317868
8-Mac2	Cuedc2	2.29433e-07	1.14498	0.17	0.418	0.00501426
8-Mac2	Slirp	2.63314e-07	1.06343	0.225	0.529	0.00575472
8-Mac2	Dynlrb1	3.43801e-07	1.01518	0.232	0.54	0.00751378
8-Mac2	Psmc3	4.92994e-07	1.13729	0.17	0.412	0.0107744
8-Mac2	Ptpmt1	5.65998e-07	1.04644	0.125	0.325	0.0123699
8-Mac2	Dynlt1f	7.1158e-07	1.05546	0.063	0.212	0.0155516
8-Mac2	Casp6	7.3149e-07	1.1046	0.044	0.175	0.0159867
8-Mac2	Hsbp1	7.54249e-07	1.14546	0.221	0.52	0.0164841
8-Mac2	Pfdn1	8.29259e-07	1.10912	0.155	0.38	0.0181235
8-Mac2	Faim	1.08258e-06	1.45215	0.107	0.288	0.0236598
8-Mac2	4921524J17Rik	1.1744e-06	1.04665	0.048	0.179	0.0256666
8-Mac2	Sap30l	1.28047e-06	1.04052	0.077	0.232	0.0279847
8-Mac2	Rnaseh2c	1.28896e-06	1.19564	0.122	0.318	0.0281703
8-Mac2	Cox20	1.52214e-06	1.16608	0.148	0.361	0.0332663
11-Mac1	Lsp1	2.97232e-119	4.55354	0.936	0.128	6.49601e-115
11-Mac1	Crip1	9.4699e-116	5.15975	0.931	0.128	2.06965e-111
11-Mac1	S100a11	8.64001e-111	4.50985	0.904	0.14	1.88827e-106
11-Mac1	Tmsb10	2.08961e-100	3.88145	0.986	0.398	4.56684e-96
11-Mac1	Napsa	5.27228e-100	3.79128	0.867	0.103	1.15226e-95
11-Mac1	Plac8	1.76658e-98	6.96433	0.674	0.013	3.86086e-94
11-Mac1	Cytip	2.35309e-94	3.89194	0.844	0.125	5.14267e-90
11-Mac1	Flt3	3.57217e-85	6.22012	0.573	0.007	7.80697e-81
11-Mac1	S100a6	2.65903e-82	3.95874	0.853	0.183	5.81131e-78
11-Mac1	Klrd1	3.59664e-82	9.65128	0.537	0.003	7.86045e-78
11-Mac1	Itgb7	1.73202e-78	6.87339	0.532	0.007	3.78533e-74
11-Mac1	Rpsa	2.79858e-73	1.37095	1	0.922	6.1163e-69
11-Mac1	Vim	2.02745e-72	3.52305	0.826	0.196	4.431e-68
11-Mac1	Traf1	3.14484e-71	4.97741	0.606	0.05	6.87304e-67
11-Mac1	Anxa2	3.26631e-70	3.81186	0.592	0.043	7.13853e-66
11-Mac1	Cbfa2t3	4.35084e-70	3.95611	0.619	0.055	9.50875e-66
11-Mac1	S100a4	5.48909e-69	4.25837	0.601	0.055	1.19964e-64
11-Mac1	Cnn2	7.29811e-67	3.39019	0.647	0.083	1.595e-62
11-Mac1	Rplp0	1.14228e-64	1.34137	1	0.87	2.49645e-60
11-Mac1	Jaml	8.79761e-64	5.67927	0.468	0.013	1.92272e-59
11-Mac1	4930523C07Rik	4.31471e-62	4.71985	0.482	0.022	9.4298e-58
11-Mac1	H2-Oa	5.00061e-62	3.93648	0.541	0.048	1.09288e-57
11-Mac1	Rps11	4.03719e-59	1.09771	1	0.94	8.82327e-55
11-Mac1	Klrk1	4.55416e-59	4.73331	0.491	0.032	9.95312e-55
11-Mac1	Rps19	5.70243e-58	1.20704	0.995	0.857	1.24627e-53
11-Mac1	Actg1	1.46578e-57	1.71648	0.986	0.772	3.20347e-53
11-Mac1	P2ry10	2.17168e-57	5.26231	0.436	0.015	4.74621e-53
11-Mac1	Plp2	5.22833e-57	5.75691	0.417	0.01	1.14265e-52
11-Mac1	Bri3bp	5.46463e-57	3.22307	0.537	0.053	1.19429e-52
11-Mac1	Bhlhe40	5.29332e-56	4.23742	0.532	0.058	1.15685e-51
